# Supplementary material for: Telomerase RNA component knockout exacerbates Staphylococcus aureus pneumonia by extensive inflammation and dysfunction of T cells
Source: eLife. 2024 Nov 28;13:RP100433. doi: 10.7554/eLife.100433 (PMC11604217; doi:10.7554/eLife.100433)
Supplement: Figure 1—figure supplement 1—source data 1. [file elife-100433-fig1-figsupp1-data1.xlsx]

## Sheet: Calculation
Reference sample length (Mb)									relative telomere length to the target sample	Total telomere length of the target sample per diploid cell (± 0.32 Mb)	Average telomere length on each chromosome end (80 chromosome ends in one mouse diploid cell) [kb per chromosome end] ±3 kb	Mean telomere length per diploid cell (± 0.32 Mb)	Mean telomere length per chromosome end [kb per chromosome end] ±3 kb
5.88	Sample	Cq(Tel)	Mean Cq(Tel)	∆Cq(Tel)	Cq(SCR)	Mean Cq(SCR)	∆Cq(SCR)	∆∆Cq	2^(-∆∆Cq)
±0.15	ctrl_Tel	6.85	6.825	0	15.66	17.085	0	0	1	5.88	73.5
		6.8			18.51
	Tercko/ko #1	7.36	7.46	0.635	19.01	18.52	1.435	-0.8	1.7411	10.2377	127.971	12.9196	161.495
		7.56			18.03
	Tercko/ko #2	7.78	7.77	0.945	18.5	18.83	1.745	-0.8	1.7411	10.2377	127.971
		7.76			19.16
	Tercko/ko #3	6.78	6.79	-0.035	17.94	18.365	1.28	-1.315	2.48802	14.6296	182.87
		6.8			18.79
	Tercko/ko #4	6.64	6.635	-0.19	18.52	18.39	1.305	-1.495	2.81864	16.5736	207.17
		6.63			18.26
	Old #1	6.7	6.74	-0.085	19.48	17.785	0.7	-0.785	1.72309	10.1318	126.647	26.6898	333.622
		6.78			16.09
	Old #2	5.08	5.525	-1.3	17.88	17.59	0.505	-1.805	3.49429	20.5464	256.83
		5.97			17.3
	Old #3	5.13	5.145	-1.68	17.85	18.04	0.955	-2.635	6.21175	36.5251	456.564
		5.16			18.23
	Old #4	5.24	5.195	-1.63	19.02	18.205	1.12	-2.75	6.72717	39.5558	494.447
		5.15			17.39
	Young #1	4.36	4.375	-2.45	18.04	17.945	0.86	-3.31	9.91766	58.3159	728.948	36.6187	457.734
		4.39			17.85
	Young #2	4.33	4.365	-2.46	16.58	17.48	0.395	-2.855	7.23504	42.542	531.775
		4.4			18.38
	Young #3	5.78	6.225	-0.6	16.8	17.515	0.43	-1.03	2.04202	12.0071	150.089
		6.67			18.23
	Young #4	6.12	6.06	-0.765	18.51	18.835	1.75	-2.515	5.71598	33.6099	420.124
		6			19.16
