# Supplementary material for: Telomerase RNA component knockout exacerbates Staphylococcus aureus pneumonia by extensive inflammation and dysfunction of T cells
Source: eLife. 2024 Nov 28;13:RP100433. doi: 10.7554/eLife.100433 (PMC11604217; doi:10.7554/eLife.100433)
Supplement: Figure 1—figure supplement 1—source data 2. [file elife-100433-fig1-figsupp1-data2.xlsx]

## Sheet: diff_stat
compare	all	up	down	threshold
Tercko/ko_SavsTercko/ko_mock	2091	1526	565	DESeq2 pvalue<=0.05 |log2FoldChange|>=0.0
Young_SavsYoung_mock	746	495	251	DESeq2 pvalue<=0.05 |log2FoldChange|>=0.0
Old_SavsOld_mock	632	406	226	DESeq2 pvalue<=0.05 |log2FoldChange|>=0.0
Tercko/ko_mockvsYoung_mock	815	110	705	DESeq2 pvalue<=0.05 |log2FoldChange|>=0.0
Old_mockvsYoung_mock	2878	736	2142	DESeq2 pvalue<=0.05 |log2FoldChange|>=0.0
Tercko/ko_mockvsOld_mock	3275	1676	1599	DESeq2 pvalue<=0.05 |log2FoldChange|>=0.0
Tercko/ko_SavsOld_Sa	4582	2465	2117	DESeq2 pvalue<=0.05 |log2FoldChange|>=0.0
Tercko/ko_SavsYoung_Sa	2784	1125	1659	DESeq2 pvalue<=0.05 |log2FoldChange|>=0.0
Old_SavsYoung_Sa	3121	636	2485	DESeq2 pvalue<=0.05 |log2FoldChange|>=0.0
