# Supplementary material for: Telomerase RNA component knockout exacerbates Staphylococcus aureus pneumonia by extensive inflammation and dysfunction of T cells
Source: eLife. 2024 Nov 28;13:RP100433. doi: 10.7554/eLife.100433 (PMC11604217; doi:10.7554/eLife.100433)
Supplement: Figure 1—source data 1. [file elife-100433-fig1-data1.xlsx]

## Sheet: Overview_paper
			Weight				Score
			d0 (Infection)		d1 (Section)		d0 (Infection)	d1 (Section)	lung (mg)		CFU
Group	Genotype	Condition	Total (g)	Rel. Weight (%)	Total (g)	Rel. Weight (%)			Total (g)	Rel. Weight (%)	BAL	Kidney	Liver
Tercko/ko	Tercko/ko	S.aureus	13.9	1.02963	13.1	0.942446	0	30	0.191	0.0145802	4890000	60	50
			Dead					40
			Dead					40
			19.2	0.969697	19.2	1	0	0	0.198	0.0103125	8500	0	0
			16.5	1.01852	15.5	0.939394	0	30	0.215	0.013871	360000	160	300
	Tercko/ko	mock	14.6	1.04286	14.7	1.00685	0	0	0.206	0.0140136	NA	NA	NA
			18.9	1.02162	18.4	0.973545	0	0	0.198	0.0107609	NA	NA	NA
			21.7	1.085	22	1.01382	0	0	0.289	0.0131364	NA	NA	NA
Young	Wildtype	S.aureus	17.2	1	15.9	0.924419	0	5	0.244	0.0153459	27000	0	0
			19.3	1	19	0.984456	0	0	0.256	0.0134737	1360	0	0
			18.7	1	18.7	1	0	0	0.275	0.0147059	826.667	0	0
			19.3	1	19.5	1.01036	0	0	0.305	0.015641	1840	0	0
			18.1	1	16.8	0.928177	0	5	0.264	0.0157143	1813.33	0	0
	Wildtype	mock	18.95	101.175	19.21	101.372	0	0	0.207	0.0104125	NA	NA	NA
			19.36	95.9841	20.02	103.409	0	0	0.239	0.0117157	NA	NA	NA
			18.6	99.1471	18.73	100.699	0	0	0.22	0.0113344	NA	NA	NA
			18.73	99.153	19.25	102.776	0	0	0.18	0.00934094	NA	NA	NA
			18.73	97.1473	19.21	102.563	0	0	0.252	0.0131318	NA	NA	NA
Old	Wildtype	S.aureus	26.6	1	26.5	0.996241	0	0	0.485	0.0183019	1700	0	0
			24.5	1	26.1	1.06531	0	0	0.366	0.014023	240	0	0
			23.5	1	25.3	1.0766	0	0	0.31	0.012253	2100	0	0
			25.5	1	25.7	1.00784	0	0	0.309	0.0120233	560	0	0
			28.2	1	27.3	0.968085	0	0	0.377	0.0138095	1046.67	0	0
	Wildtype	mock	31.1	1	30.9	0.993569	0	0	0.315	0.0101942	NA	NA	NA
			28.5	1	29.2	1.02456	0	0	0.33	0.0113014	NA	NA	NA
			27.12	1	28.6	1.05457	0	0	0.325	0.0113636	NA	NA	NA
			29.62	1	30.9	1.04321	0	0	0.335	0.0108414	NA	NA	NA
			28.08	1	29.8	1.06125	0	0	0.327	0.0109732	NA	NA	NA
