# Supplementary material for: Telomerase RNA component knockout exacerbates Staphylococcus aureus pneumonia by extensive inflammation and dysfunction of T cells
Source: eLife. 2024 Nov 28;13:RP100433. doi: 10.7554/eLife.100433 (PMC11604217; doi:10.7554/eLife.100433)
Supplement: Figure 2—figure supplement 1—source data 1. — List of relevant differentially expressed genes (DEGs). [file elife-100433-fig2-figsupp1-data1.xlsx]

## Sheet: Tabelle1
gene_name	Gene Number	ENSG	Young S. aureus vs Young mock	Tercko/ko mock vs Old mock	Old mock vs Young mock	Tercko/ko S. aureus vs Young S. aureus	Tercko/ko S. aureus vs Old S. aureus	Old S. aureus vs Young S. aureus	Tercko/ko S. aureus vs Tercko/ko mock	Old S. aureus vs Old mock
CHUK	1	ENSMUSG00000025199	0	-1.36265	0	0	0	0	0	0
NFKBIB	2	ENSMUSG00000030595	0	0	0	0	0	0	1.47999	0
NFKBIA	3	ENSMUSG00000021025	0	0	0	3.2031	3.56647	0	3.27058	0
NFKB1	4	ENSMUSG00000028163	0	0	0	0	0.705672	0	0	0
IL1B	5	ENSMUSG00000027398	0	0	0	5.50744	5.3779	0	5.40638	0
IL18	6	ENSMUSG00000039217	0	0	0	0	-3.74692	0	0	0
IL6	7	ENSMUSG00000025746	0	0	0	0	6.14441	0	0	0
TNF	8	ENSMUSG00000024401	0	0	0	3.60886	6.24119	0	0	0
CXCL1	9	ENSMUSG00000029380	0	0	0	9.83291	9.45782	0	9.44527	0
CXCL2	10	ENSMUSG00000058427	0	0	0	10.6869	12.2304	0	14.1947	0
CXCL3	11	ENSMUSG00000029379	0	0	0	13.5644	13.062	0	10.4217	0
CCL2	12	ENSMUSG00000035385	0	0	0	3.44154	5.23331	0	4.96491	0
CCL12	13	ENSMUSG00000035352	0	0	3.23033	5.00585	2.27409	0	3.12064	0
CAMP	14	ENSMUSG00000038357	0	0	0	6.30329	7.48527	0	10.2714	0
NOD2	15	ENSMUSG00000055994	0	0	0	0	3.27153	-2.36424	0	0
TAB2	16	ENSMUSG00000015755	0	0	0	0.906468	1.04958	0	0	0
MAPK9	17	ENSMUSG00000020366	0	0.63171	0	0	0	0	0	0
MAPK10	18	ENSMUSG00000046709	2.71088	4.35345	0	0	0	-2.55118	0	0
MAPK12	19	ENSMUSG00000022610	0	0	0.851226	0	-1.88249	1.23474	0	0
JUN	20	ENSMUSG00000052684	0	1.07796	-1.05635	0	1.14893	0	0	0
GABARAPL1	21	ENSMUSG00000030161	0	0	0	0	0	0.756067	0	0
RBCK1	22	ENSMUSG00000027466	0	0	0	-1.04601	0	0	-1.09698	0
XIAP	23	ENSMUSG00000025860	0	0.844799	0	0	0	0	0	0
ERBIN	24	ENSMUSG00000021709	0	0	0	1.52229	0	0	0.855812	0
BIRC2	25	ENSMUSG00000057367	0	0	0	0	0	0	1.47418	0
BIRC3	26	ENSMUSG00000032000	0	0	0	2.7744	2.70429	0	2.78603	0
TRAF6	27	ENSMUSG00000027164	0	0	0	2.29975	1.75961	0	1.98322	0
TNFAIP3	28	ENSMUSG00000019850	0	0	0	4.59605	4.99685	0	4.48589	0
TBK1	29	ENSMUSG00000020115	0	0	0	1.47881	0	0	0	0
IKBKE	30	ENSMUSG00000042349	1.91241	-1.28753	1.28213	0	0	0	0	0
TANK	31	ENSMUSG00000064289	0	0	0	0	0	0	1.32777	0
IFNA13	32	ENSMUSG00000063376	0	0	-6.155	0	0	0	0	0
IFNA14	33	ENSMUSG00000095896	0	0	-6.64572	0	0	0	0	0
ANTXR1	34	ENSMUSG00000033420	0	1.35367	-1.18185	0	0	0	0	0
NLRP1A	35	ENSMUSG00000069830	0	6.56705	0	0	0	0	0	0
CASP1	36	ENSMUSG00000025888	0	0	0	0	-2.39445	0	0	0
BCL2L1	37	ENSMUSG00000007659	0	0	0	1.68131	1.68644	0	1.42064	0
NLRP3	38	ENSMUSG00000032691	0	0	0	6.22614	5.23191	0	5.17841	0
P2RX7	39	ENSMUSG00000029468	0	0	0	-2.04874	-1.7202	0	0	0
TRPM2	40	ENSMUSG00000009292	0	0	0	0	0	-3.25732	0	0
GPRC6A	41	ENSMUSG00000019905	0	6.65149	-5.14709	0	0	0	0	0
PLCB3	42	ENSMUSG00000024960	0	-0.92133	0.885851	0	-1.80243	1.07144	0	0
PLCB4	43	ENSMUSG00000039943	0	0	0	0	0	0	1.00427	0
ITPR1	44	ENSMUSG00000030102	0	0	0	0	-1.0463	0	0	0
ITPR3	45	ENSMUSG00000042644	0	0	0	-2.34942	-2.15549	0	0	0
VDAC2	46	ENSMUSG00000021771	0	0	0	0	0	0	0.926571	0
MCU	47	ENSMUSG00000009647	0	-1.03976	0	0	0	0	0	0
OAS1A	48	ENSMUSG00000052776	0	0	1.8013	0	0	0	0	0
OAS2	49	ENSMUSG00000032690	0	0	2.49934	0	0	0	0	-1.15347
MFN1	50	ENSMUSG00000027668	0	0	0	0	-0.937678	0	0	0
RIPK1	51	ENSMUSG00000021408	0	0	0	1.46344	1.39039	0	1.20242	0
NAMPT	52	ENSMUSG00000020572	0	0	0	1.23645	1.16665	0	1.03653	0
CYBA	53	ENSMUSG00000006519	1.06322	0	0	0	0	0	0	0
TXNIP	54	ENSMUSG00000038393	-0.647664	0	0	1.46212	0	0.732021	1.21713	0
TXN1	55	ENSMUSG00000028367	0	0	0	0	0.872716	0	0	0
NEK7	56	ENSMUSG00000026393	0	0	0	1.17744	0	0	0	0
HSP90AA1	57	ENSMUSG00000021270	0	0	0	0	0	0	0	-0.819827
GPSM3	58	ENSMUSG00000034786	1.21787	0	0	0	1.9223	-2.0561	0	0
IRGM1	59	ENSMUSG00000046879	0	0	0	1.64018	1.61478	0	1.69585	0
MEFV	60	ENSMUSG00000022534	0	0	0	0	4.28034	0	0	0
CASP8	61	ENSMUSG00000026029	0	0.857977	0	0	0	0	0	0
NLRP12	62	ENSMUSG00000078817	0	0	-7.08931	0	4.34625	0	0	0
NAIP6	63	ENSMUSG00000078942	0	0	0	-7.05929	-5.69134	0	0	0
NAIP2	64	ENSMUSG00000078945	0	-2.6089	0	0	0	0	0	0
NLRC4	65	ENSMUSG00000039193	0	0	0	0	0	-2.01025	0	0
PRKCD	66	ENSMUSG00000021948	0	0	0.894455	0	0	0	0	0
GBP2	67	ENSMUSG00000028270	0	0	0	1.93399	1.55048	0	1.60159	0
GBP5	68	ENSMUSG00000105504	0	0	0	3.50922	2.59341	0	2.92203	0
AIM2	69	ENSMUSG00000037860	2.5456	0	0	0	0	-1.94859	0	0
IFI204	70	ENSMUSG00000073489	0	0	0	0	1.86949	0	0	0
TRP53BP1	71	ENSMUSG00000043909	0	-0.926612	0	-2.30081	-1.9862	0	0	0
RHOA	72	ENSMUSG00000007815	0	0	0	0.861959	0	0	0	0
GBP3	73	ENSMUSG00000028268	0	0	0	2.31268	1.74274	0	1.86219	0
CASP4	74	ENSMUSG00000033538	0	0	0	1.61016	0	0	1.79853	0
JAK1	75	ENSMUSG00000028530	0	0	0	0	0.997436	0	0.842329	0
TYK2	76	ENSMUSG00000032175	0	0	0	-2.41231	0	0	0	0
MYD88	77	ENSMUSG00000032508	0	0	0	1.61538	2.10234	0	2.21374	0
TLR2	78	ENSMUSG00000027995	0	0	0	3.09042	3.8782	0	3.19763	0
NFKBIZ	79	ENSMUSG00000035356	0	0	0	2.94143	3.41014	0	4.05972	0
