# Supplementary material for: Telomerase RNA component knockout exacerbates Staphylococcus aureus pneumonia by extensive inflammation and dysfunction of T cells
Source: eLife. 2024 Nov 28;13:RP100433. doi: 10.7554/eLife.100433 (PMC11604217; doi:10.7554/eLife.100433)
Supplement: Figure 2—figure supplement 1—source data 2. — List of relevant differentially expressed genes (DEGs). [file elife-100433-fig2-figsupp1-data2.xlsx]

## Sheet: Tabelle1
gene_name	Gene Number	ENSG	Tercko/ko mock vs Young mock	Young S. aureus vs Young mock	Tercko/ko mock vs Old mock	Old mock vs Young mock	Tercko/ko S. aureus vs Young S. aureus	Tercko/ko S. aureus vs Old S. aureus	Old S. aureus vs Young S. aureus	Tercko/ko S. aureus vs Tercko/ko mock	Old S. aureus vs Old mock
CD14	1	ENSMUSG00000051439	0	0	-1.03326	0.917424	3.65321	4.14327	0	4.50856	0
CD68		ENSMUSG00000018774	0	2.14477	0	0	0	0	0	0	0
Ly6c1	2	ENSMUSG00000079018	0	0	1.0232	0	0.924884	1.45013	0	0	0
MARCO	3	ENSMUSG00000026390	2.3326	2.53888	1.83734	0	0	4.06552	-3.88805	0	-1.87272
NOS2	4	ENSMUSG00000020826	0	0	2.23542	0	0	0	-2.66199	0	0
PPARG	5	ENSMUSG00000000440	0	0	-1.90292	0	0	0	0	0	0
TLR2	6	ENSMUSG00000027995	0	0	0	0	3.09042	3.8782	0	3.19763	0
CD200R1	7	ENSMUSG00000022667	0	0	0	0	2.13576	2.47518	0	2.2134	0
CD80	8	ENSMUSG00000075122	0	0	0	0	0	3.00744	-1.65618	2.16129	0
CLEC7A	9	ENSMUSG00000079293	0	0	0	0	0	1.74184	0	0	0
ITGAM	10	ENSMUSG00000030786	0	0	0	0	2.20746	2.48175	0	0	0
PDCD1LG2	11	ENSMUSG00000016498	0	0	7.02486	-6.8957	0	0	0	0	0
Retnla	12	ENSMUSG00000061100	0	0	0	0	0	1.65783	-2.02248	0	-1.2164
TNF	13	ENSMUSG00000024401	0	0	0	0	3.60886	6.24119	0	0	0
CCL22	14	ENSMUSG00000031779	0	0	0	0	0	4.16629	-3.04615	3.08443	0
CD36	15	ENSMUSG00000002944	0	0	0.736119	-0.871851	0	0	0	0	0
IL1B	16	ENSMUSG00000027398	0	0	0	0	5.50744	5.3779	0	5.40638	0
IL6	17	ENSMUSG00000025746	0	0	0	0	0	6.14441	0	0	0
LGALS3	18	ENSMUSG00000050335	0	0	0	0	0	1.00134	0	0.923422	0
CCL2	19	ENSMUSG00000035385	0	0	0	0	3.44154	5.23331	0	4.96491	0
CD63	20	ENSMUSG00000025351	0	0	0	0	0	0	0	0.996976	0
CSF1	21	ENSMUSG00000014599	0	0	-1.49974	1.25763	2.21798	1.90261	0	2.10613	-1.3871
CXCL2	22	ENSMUSG00000058427	0	0	0	0	10.6869	12.2304	0	14.1947	0
IRF4	23	ENSMUSG00000021356	0	1.66684	0	0	-3.38473	0	0	0	0
PTPRC	24	ENSMUSG00000026395	0	2.47292	0	0	-1.94556	0	0	0	0
STAT6	25	ENSMUSG00000002147	0	0	0	0	0	-1.27861	0	0	0
TIMD4	26	ENSMUSG00000055546	0	0	0	0	0	0	-3.83361	0	0
Chil3	27	ENSMUSG00000040809	0	0	0	0	0	2.54071	-1.87528	0	0
IL1R1	28	ENSMUSG00000026072	0	0	0	0	1.35781	1.18547	0	1.26192	0
ITGB2		ENSMUSG00000000290	0	1.8532	0	0	0	0	0	0	0
