# Supplementary material for: Telomerase RNA component knockout exacerbates Staphylococcus aureus pneumonia by extensive inflammation and dysfunction of T cells
Source: eLife. 2024 Nov 28;13:RP100433. doi: 10.7554/eLife.100433 (PMC11604217; doi:10.7554/eLife.100433)
Supplement: Figure 2—figure supplement 1—source data 3. — List of relevant differentially expressed genes (DEGs). [file elife-100433-fig2-figsupp1-data3.xlsx]

## Sheet: Tabelle1
gene_name	Gene number	ENSB	Young S. aureus vs Young mock	Tercko/ko S. aureus vs Young S. aureus	Tercko/ko S. aureus vs Tercko/ko mock	Tercko/ko S. aureus vs Old S. aureus	Tercko/ko mock vs Young mock	Tercko/ko mock vs Old mock	Old S. aureus vs Young S. aureus	Old S. aureus vs Old mock	Old mock vs Young mock
CXCL1	1	ENSMUSG00000029380	0	9.83291	9.44527	9.45782	0	0	0	0	0
CXCL2	2	ENSMUSG00000058427	0	10.6869	14.1947	12.2304	0	0	0	0	0
CXCL3	3	ENSMUSG00000029379	0	13.5644	10.4217	13.062	0	0	0	0	0
CXCL5	4	ENSMUSG00000029371	0	4.04562	0	4.83889	0	0	0	0	0
PPBP	5	ENSMUSG00000029372	0	0	-1.04177	-2.00488	0	0	1.7811	0	0
CXCL9	6	ENSMUSG00000029417	0	0	7.84874	0	0	0	0	0	0
CXCL10	7	ENSMUSG00000034855	4.90857	6.36287	7.54401	0	0	0	0	0	5.9166
CXCL11	8	ENSMUSG00000060183	0	0	7.2774	0	0	0	0	0	0
CXCL12	9	ENSMUSG00000061353	0	0	-1.52139	0	0	0.87915	0	0	0
CXCL13	10	ENSMUSG00000023078	0	0	3.06919	0	0	0	0	0	0
CXCL16	11	ENSMUSG00000018920	0	1.88082	1.74055	2.13667	0	0	0	0	0
CXCL15	12	ENSMUSG00000029375	0	0	0	1.41998	0	0.921235	0	0	-0.731271
CCL2	13	ENSMUSG00000035385	0	3.44154	4.96491	5.23331	0	0	0	0	0
CCL12	14	ENSMUSG00000035352	0	5.00585	3.12064	2.27409	0	0	0	0	3.23033
CCL3	15	ENSMUSG00000000982	0	7.5349	7.30692	8.40364	0	4.34831	0	0	0
CCL4	16	ENSMUSG00000018930	0	8.33303	5.345	5.49179	0	5.46803	0	5.29884	-5.11759
CCL6	17	ENSMUSG00000018927	0	0	0	1.97807	0	0.928117	0	0	0
CCL7	18	ENSMUSG00000035373	0	3.43777	2.56923	2.47556	0	0	0	0	0
CCL8	19	ENSMUSG00000009185	0	0	0	-3.4971	0	0	2.66433	0	0
CCL9	20	ENSMUSG00000019122	0	0	1.88158	2.68515	0	0	-1.22074	0	0
CCL11	21	ENSMUSG00000020676	0	0	0	0	0	2.19873	0	0	0
CCL17	22	ENSMUSG00000031780	0	0	2.8985	2.73108	0	0	0	0	0
CCL20	23	ENSMUSG00000026166	0	7.4037	10.3006	5.07546	0	-5.37698	0	0	0
CCL21A	24	ENSMUSG00000095320	0	0	0	0	0	0	0	-1.51959	0
CCL22	25	ENSMUSG00000031779	0	0	3.08443	4.16629	0	0	-3.04615	0	0
CCL24	26		0	0	0	0	0	0	0	0	0
CCL25	27	ENSMUSG00000023235	0	0	-3.25084	-2.5929	0	0	0	0	0
CCL28	28	ENSMUSG00000074715	0	0	-6.03471	0	0	4.28493	0	0	0
CXCR2	29	ENSMUSG00000026180	0	0	3.07228	5.13236	0	0	-3.72838	0	0
CXCR1	30	ENSMUSG00000048480	0	-7.26356	0	0	0	6.63516	0	0	-6.42517
CXCR4	31	ENSMUSG00000045382	1.04365	0	0	0	0	1.71609	-1.34563	0	0
CXCR5	32	ENSMUSG00000047880	0	0	0	0	0	0	-3.26626	0	0
CXCR6	33	ENSMUSG00000048521	0	0	0	-2.4299	0	-1.90842	0	0	1.99576
CCR8	34	ENSMUSG00000042262	0	0	0	0	0	6.73333	0	0	0
CCR9	35	ENSMUSG00000029530	2.1804	0	0	2.69795	0	0	-3.08835	0	0
CCR4	36	ENSMUSG00000047898	0	0	0	0	0	0	0	0	-7.00378
CCR1	37	ENSMUSG00000025804	0	4.42439	5.03347	3.36722	0	0	0	0	0
JAK2	38	ENSMUSG00000024789	0	1.79615	1.47222	0	0	0	0	0	0
STAT3	39	ENSMUSG00000004040	0	1.07613	1.11741	1.12139	0	0	0	0	0
STAT5B	40	ENSMUSG00000020919	0	0	0	0	0	1.00056	0	0	0
GNAI3	41	ENSMUSG00000000001	0	1.33705	1.00883	1.24477	0	0	0	0	0
GNAI2	42	ENSMUSG00000032562	0	0	0	0	0	0.765833	0	0	0
ADCY4	43	ENSMUSG00000022220	0	0	-2.03341	0	0	1.75979	0	0	0
ADCY7	44	ENSMUSG00000031659	1.52806	-1.9132	0	-1.02073	0	0	0	0	0
ADCY8	45	ENSMUSG00000022376	0	0	0	0	0	2.83562	0	0	0
PRKACB	46	ENSMUSG00000005034	0	0	0	0	0	0.911787	0	0	0
LYN	47	ENSMUSG00000042228	0	0	0	0	0	0.955625	0	0	0
HCK	48	ENSMUSG00000003283	0	0	0	0	0	1.21802	0	1.24438	0
FGR	49	ENSMUSG00000028874	0	0	1.9229	2.63606	0	0	-2.08952	0	0
SHC2	50	ENSMUSG00000020312	0	-4.08088	-4.0358	0	0	0	0	0	0
SHC3	51	ENSMUSG00000021448	0	0	0	4.69852	0	0	-4.67693	0	0
SHC4	52	ENSMUSG00000035109	0	-6.56694	0	0	0	0	0	0	0
GRB2	53	ENSMUSG00000059923	0	0	0	0.793137	0	0	0	0	0
SOS2	54	ENSMUSG00000034801	0	0	0	0.8387	0	0	0	0	0
KRAS	55	ENSMUSG00000030265	0	1.1641	0	0	0	0	0	0	0
NRAS	56	ENSMUSG00000027852	0	0	0	1.02645	0	0.763103	0	0	0
MAP2K1	57	ENSMUSG00000004936	0	0	0	0.763173	0	0.733725	0	0	0
PIK3CD	58	ENSMUSG00000039936	2.33936	-1.59645	0	0	1.00098	0	-1.71731	0	0
PIK3R2	59	ENSMUSG00000031834	0	0	0	0	0	-0.763504	0	0	1.05333
PIK3R1	60	ENSMUSG00000041417	0	0	0	0	0	0.663277	0	0	0
PIK3R3	61	ENSMUSG00000028698	0	0	-2.1207	0	1.12738	0	0	0	0
PIK3R5	62	ENSMUSG00000020901	2.5979	0	0	0	0	0	0	0	0
PRKCZ	63	ENSMUSG00000029053	0	0	0	-2.02876	0	-1.40794	1.25688	0	1.16921
AKT3	64	ENSMUSG00000019699	0	0	0	0	0	1.32011	0	0	0
CHUK	65	ENSMUSG00000025199	0	0	0	0	0	-1.36265	0	0	0
NFKBIA	66	ENSMUSG00000021025	0	3.2031	3.27058	3.56647	0	0	0	0	0
NFKBIB	67	ENSMUSG00000030595	0	0	1.47999	0	0	0	0	0	0
NFKB1	68	ENSMUSG00000028163	0	0	0	0.705672	0	0	0	0	0
ITK	69	ENSMUSG00000020395	2.68584	-3.27714	0	0	0	0	-2.66101	0	0
VAV1	70	ENSMUSG00000034116	1.70341	0	0	0	0	0	0	0	0
VAV3	71	ENSMUSG00000033721	0	0	0	0	0	0	0	2.34829	-2.56072
RAC1	72	ENSMUSG00000001847	0	1.07721	0	0	0	0.717905	0	0	0
RAC2	73	ENSMUSG00000033220	0	0	0	0	0	0	-1.46261	0	0
RAC3	74	ENSMUSG00000018012	0	0	0	-2.18584	0	-1.52265	1.70875	0	0
CDC42	75	ENSMUSG00000006699	0	0	0	0.761852	0	0	0	0	0
RHOA	76	ENSMUSG00000007815	0	0.861959	0	0	0	0	0	0	0
ROCK2	77	ENSMUSG00000020580	0	1.2971	0	1.17438	0	0	0	0	0
GNB1	78	ENSMUSG00000029064	0	0	0	0	0	0.695007	0	0	0
GNB4	79	ENSMUSG00000027669	0	0	0	0	0	0.739647	0	0	0
GNB5	80	ENSMUSG00000032192	0	0	0	-1.99268	0	-1.05449	0	0	0
GNG2	81	ENSMUSG00000043004	0	0	0	0	0	1.50807	0	0	0
GNG3	82	ENSMUSG00000071658	0	0	0	3.77378	0	0	-3.28425	0	0
GNG8	83	ENSMUSG00000063594	0	-3.66841	0	0	0	0	0	0	0
GNG10	84	ENSMUSG00000038607	0	0	0	0	0	0	-6.82425	0	0
GNG12	85	ENSMUSG00000036402	0	1.79155	1.26458	1.70082	0	0.604324	0	0	0
GNG13	86	ENSMUSG00000025739	0	0	0	0	0	0	-4.61132	0	-6.13822
GNGT2	87	ENSMUSG00000038811	0	0	0	0	0	2.39041	0	1.45619	-1.98572
PREX1	88	ENSMUSG00000039621	0	0	0	0	0	0.991715	0	0	0
ELMO1	89	ENSMUSG00000041112	0	0	0	0	0	1.8696	0	0	-1.15745
DOCK2	90	ENSMUSG00000020143	1.62437	-2.11315	0	0	0	0	-1.61142	0	0
PTK2	91	ENSMUSG00000022607	0	0	0	0	0	1.04845	0	0	-0.887543
BCAR1	92	ENSMUSG00000031955	0	0	0	1.59251	0.853155	0.792613	0	0	0
CRK	93	ENSMUSG00000017776	0	0	0	0	0	0.769488	0	0	0
GNAQ	94	ENSMUSG00000024639	0	0	0	0	0	0.732295	0	0	0
PLCB3	95	ENSMUSG00000024960	0	0	0	-1.80243	0	-0.92133	1.07144	0	0.885851
PLCB4	96	ENSMUSG00000039943	0	0	1.00427	0	0	0	0	0	0
RASGRP2	97	ENSMUSG00000032946	0	0	0	0	0	1.04981	0	0	0
RAP1A	98	ENSMUSG00000068798	0	1.36339	0.818234	1.38502	0	0.771862	0	0	0
RAP1B	99	ENSMUSG00000052681	0	1.77935	1.53887	1.82674	0	0	0	0	0
TIAM1	100	ENSMUSG00000002489	0	0	0	0	0	-1.61872	0	0	0.882198
PRKCD	101	ENSMUSG00000021948	0	0	0	0	0	0	0	0	0.894455
NCF1	102	ENSMUSG00000015950	1.02117	0	0	1.67068	0	0	-1.17713	0	0
GRK3	103	ENSMUSG00000042249	0	-0.961329	0	0	0	0	0	0	0
GRK4	104	ENSMUSG00000052783	0	0	0	-3.22688	0	0	0	0	0
GRK5	105	ENSMUSG00000003228	0	0	0	1.2285	0	1.41444	0	0	0
GRK6	106	ENSMUSG00000074886	1.44653	0	0	0	0	0	-1.19813	0	0
ARRB1	107	ENSMUSG00000018909	0	0	0	0	0	0.886974	0	0	0
ARRB2	108	ENSMUSG00000060216	0	0	0	0	0	0	-1.11372	0	0
