# Supplementary material for: Telomerase RNA component knockout exacerbates Staphylococcus aureus pneumonia by extensive inflammation and dysfunction of T cells
Source: eLife. 2024 Nov 28;13:RP100433. doi: 10.7554/eLife.100433 (PMC11604217; doi:10.7554/eLife.100433)
Supplement: Figure 2—figure supplement 1—source data 4. — List of relevant differentially expressed genes (DEGs). [file elife-100433-fig2-figsupp1-data4.xlsx]

## Sheet: Tabelle2
gene_name	Gene Number	ENSG	Tercko/ko mock vs Young mock	Young S. aureus vs Young mock	Tercko/ko mock vs Old mock	Old mock vs Young mock	Tercko/ko S. aureus vs Young S. aureus	Tercko/ko S. aureus vs Old S. aureus	Old S. aureus vs Young S. aureus	Tercko/ko S. aureus vs Tercko/ko mock	Old S. aureus vs Old mock
CD2	1	ENSMUSG00000027863	0	0	0	0	-2.44756	0	0	0	0
CD4	2	ENSMUSG00000023274	0	2.61297	0	0	-4.02978	0	0	0	0
CD5	3	ENSMUSG00000024669	0	6.38178	0	0	-8.83841	0	-3.73077	0	0
CD27	4	ENSMUSG00000030336	0	1.95718	0	0	-2.1845	0	-2.04313	0	0
CD28	5	ENSMUSG00000026012	0	0	0	0	0	-6.16513	0	0	0
CD44	6	ENSMUSG00000005087	0	0	0	0	0	1.53424	0	1.44857	0
TNFRSF9	7	ENSMUSG00000028965	0	0	0	0	5.28963	6.98319	0	6.90275	0
CTLA4	8	ENSMUSG00000026011	0	0	0	0	0	0	0	0	4.18695
BTLA	9	ENSMUSG00000052013	0	2.52585	0	0	0	0	-2.13395	0	0
PDCD1	10	ENSMUSG00000026285	-5.09941	0	0	0	-7.02822	-5.27938	0	0	0
ENTPD1	11	ENSMUSG00000048120	0	0	0	0	1.92052	2.48512	0	1.59992	0
IL1R1	12	ENSMUSG00000026072	0	0	0	0	1.35781	1.18547	0	1.26192	0
CCR4	13	ENSMUSG00000047898	0	0	0	-7.00378	0	0	0	0	0
IL21R	14	ENSMUSG00000030745	0	3.65435	0	0	0	0	-2.29211	0	0
AHR	15	ENSMUSG00000019256	0	-1.34462	0.644637	-1.07792	0	0	0	0	0
IRF4	16	ENSMUSG00000021356	0	1.66684	0	0	-3.38473	0	0	0	0
RORA	17	ENSMUSG00000032238	0	0	1.00137	0	0	0	0	0	0
RORC	18	ENSMUSG00000028150	0	0	0	0	0	-1.42849	2.07261	0	0.889116
CD247	19	ENSMUSG00000005763	0	2.42353	0	0	-8.85749	-6.958	-1.88668	-7.37186	0
LCK	20	ENSMUSG00000000409	0	3.04102	0	0	-1.97555	0	-2.44285	0	0
STAT3	21	ENSMUSG00000004040	0	0	0	0	1.07613	1.12139	0	1.11741	0
