# Supplementary material for: Telomerase RNA component knockout exacerbates Staphylococcus aureus pneumonia by extensive inflammation and dysfunction of T cells
Source: eLife. 2024 Nov 28;13:RP100433. doi: 10.7554/eLife.100433 (PMC11604217; doi:10.7554/eLife.100433)
Supplement: Figure 2—figure supplement 1—source data 5. — List of relevant differentially expressed genes (DEGs). [file elife-100433-fig2-figsupp1-data5.xlsx]

## Sheet: Tabelle1
gene_name	Gene Number	ENSG	Tercko/ko mock vs Young mock	Young S. aureus vs Young mock	Tercko/ko mock vs Old mock	Old mock vs Young mock	Tercko/ko S. aureus vs Young S. aureus	Tercko/ko S. aureus vs Old S. aureus	Old S. aureus vs Young S. aureus	Tercko/ko S. aureus vs Tercko/ko mock	Old S. aureus vs Old mock
CD3D	1	ENSMUSG00000032094	0	2.81391	0	0	0	0	-1.90957	0	0
CD3E	2	ENSMUSG00000032093	0	0	0	0	0	2.36705	-2.68387	0	0
CD3G	3	ENSMUSG00000002033	0	0	0	0	-2.60375	0	0	0	1.14051
CD247	4	ENSMUSG00000005763	0	2.42353	0	0	-8.85749	-6.958	-1.88668	-7.37186	0
CD4	5	ENSMUSG00000023274	0	2.42353	0	0	-4.02978	0	0	0	0
CD8B1	6	ENSMUSG00000053044	0	2.93188	0	0	0	0	-4.24124	0	0
PTPRC	7	ENSMUSG00000026395	0	2.47292	0	0	-1.94556	0	0	0	0
LCK	8	ENSMUSG00000000409	0	3.04102	0	0	-1.97555	0	-2.44285	0	0
FYN	9	ENSMUSG00000019843	0	0	0.885852	0	0	0	0	0	0
LCP2	10	ENSMUSG00000002699	0	0	0	0	0	0	0	1.59996	0
LAT	11	ENSMUSG00000030742	0	2.7879	-2.72745	2.57034	-3.17528	-2.63439	0	0	0
ITK	12	ENSMUSG00000020395	0	2.68584	0	0	-3.27714	0	-2.66101	0	0
NCK1	13	ENSMUSG00000032475	0	-0.854624	0.978142	-0.831398	0	0	0	0	0
VAV1	14	ENSMUSG00000034116	0	1.70341	0	0	0	0	0	0	0
VAV3	15	ENSMUSG00000033721	0	0	0	-2.56072	0	0	0	0	2.34829
GRB2	16	ENSMUSG00000059923	0	0	0	0	0	0.793137	0	0	0
PAK3	17	ENSMUSG00000031284	0	0	7.07049	-6.98511	0	0	0	0	6.64671
PAK6	18	ENSMUSG00000074923	0	0	-2.32209	1.55941	0	0	1.28613	0	0
RHOA	19	ENSMUSG00000007815	0	0	0	0	0.861959	0	0	0	0
CDC42	20	ENSMUSG00000006699	0	0	0	0	0	0.761852	0	0	0
MAPK12	21	ENSMUSG00000022610	0	0	0	0.851226	0	-1.88249	1.23474	0	0
PPP3CC	22	ENSMUSG00000022092	0	0	0	0	0	-1.49227	0	0	0
PPP3R1	23	ENSMUSG00000033953	0	0	0	0	1.33454	0.989911	0	1.21414	0
NFATC1	24	ENSMUSG00000033016	1.02015	1.46604	1.30147	0	0	0.955491	-0.932064	0	0
SOS2	25	ENSMUSG00000034801	0	0	0	0	0	0.8387	0	0	0
RASGRP1	26	ENSMUSG00000027347	0	2.1116	0	0	0	0	0	0	0
KRAS	27	ENSMUSG00000030265	0	0	0	0	1.1641	0	0	0	0
NRAS	28	ENSMUSG00000027852	0	0	0.763103	0	0	1.02645	0	0	0
MAP2K1	29	ENSMUSG00000004936	0	0	0.733725	0	0	0.763173	0	0	0
FOS	30	ENSMUSG00000021250	-1.02324	-1.76888	0	0	0	0	1.8385	0	0
JUN	31	ENSMUSG00000052684	0	0	1.07796	-1.05635	0	1.14893	0	0	0
CARD11	32	ENSMUSG00000036526	0	2.21389	0	0	-2.81374	0	-1.60663	0	0
BCL10	33	ENSMUSG00000028191	0	0	0	0	1.31464	1.78159	0	1.64588	0
MALT1	34	ENSMUSG00000032688	0	0	0	0	2.70112	2.51863	0	2.93727	0
MAPK9	35	ENSMUSG00000020366	0	0	0.63171	0	0	0	0	0	0
MAPK10	36	ENSMUSG00000046709	0	2.71088	4.35345	0	0	0	-2.55118	0	0
CHUK	37	ENSMUSG00000025199	0	0	-1.36265	0	0	0	0	0	0
NFKB1	38	ENSMUSG00000028163	0	0	0	0	0	0.705672	0	0	0
NFKBIA	39	ENSMUSG00000021025	0	0	0	0	3.2031	3.56647	0	3.27058	0
NFKBIB	40	ENSMUSG00000030595	0	0	0	0	0	0	0	1.47999	0
NFKBIE	41	ENSMUSG00000023947	0	0	0	0	0	2.93199	0	3.07434	0
CD28	42	ENSMUSG00000026012	0	0	0	0	0	-6.16513	0	0	0
PIK3R2	43	ENSMUSG00000031834	0	0	-0.763504	1.05333	0	0	0	0	0
PIK3R1	44	ENSMUSG00000041417	0	0	0.663277	0	0	0	0	0	0
PIK3R3	45	ENSMUSG00000028698	1.12738	0	0	0	0	0	0	-2.1207	0
PIK3CD	46	ENSMUSG00000039936	1.00098	2.33936	0	0	-1.59645	0	-1.71731	0	0
AKT3	47	ENSMUSG00000019699	0	0	1.32011	0	0	0	0	0	0
MAP3K8	48	ENSMUSG00000024235	0	0	0	0	3.49066	3.51132	0	3.73813	0
PDCD1	49	ENSMUSG00000026285	-5.09941	0	0	0	-7.02822	0	0	0	0
CTLA4	50	ENSMUSG00000026011	0	0	0	0	0	0	0	0	4.18695
PTPN6	51	ENSMUSG00000004266	0	2.27022	0	0	0	0	-1.90109	0	0
TNF	52	ENSMUSG00000024401	0	0	0	0	3.60886	6.24119	0	0	0
CDK4	53	ENSMUSG00000006728	0	0	0	0	0	-1.08189	0	0	0
