# Supplementary material for: Telomerase RNA component knockout exacerbates Staphylococcus aureus pneumonia by extensive inflammation and dysfunction of T cells
Source: eLife. 2024 Nov 28;13:RP100433. doi: 10.7554/eLife.100433 (PMC11604217; doi:10.7554/eLife.100433)
Supplement: Figure 2—source data 1. — Table of cytokine concentrations measured. [file elife-100433-fig2-data1.xlsx]

## Sheet: Tabelle1
			IL-1α			TNF-α (A7)			IL-1β (B2)			IL-6 (B4)			IL-17A (B6)			GM-CSF (B9)
Group	Genotype	Condition	Replicate 1	Replicate 2	Mean	Replicate 1	Replicate 2	Mean	Replicate 1	Replicate 2	Mean	Replicate 1	Replicate 2	Mean	Replicate 1	Replicate 2	Mean	Replicate 1	Replicate 2	Mean
Tercko/ko	Tercko/ko	S.aureus	3105.5	5775.67	4440.59	213.38	376.02	294.7	245.83	313.34	279.585	2729.43	15000	8864.72	160.6	165.7	163.15	173.44	185.76	179.6
			45.69	97.12	71.405	2.59	4.44	3.515	62.91	62.91	62.91	90.77	90.77	90.77	11.89	11.89	11.89	6.09	6.09	6.09
			3848.61	2331.11	3089.86	445.92	334.46	390.19	255.7	241.24	248.47	1139.88	965.48	1052.68	116.54	95.76	106.15	92.24	85.15	88.695
	Tercko/ko	mock	41.72	32.23	36.975	2.59	2.59	2.59	62.91	62.91	62.91	90.77	90.77	90.77	11.89	11.89	11.89	6.09	6.09	6.09
			41	49.05	45.025	2.59	2.59	2.59	62.91	62.91	62.91	90.77	90.77	90.77	11.89	11.89	11.89	6.09	6.09	6.09
			40.2	81.21	60.705	2.59	2.59	2.59	62.91	62.91	62.91	90.77	90.77	90.77	11.89	11.89	11.89	6.09	6.09	6.09
Young	Wildtype	S.aureus	52.87	57.06	54.965	2.59	2.59	2.59	62.91	62.91	62.91	90.77	90.77	90.77	11.89	11.89	11.89	6.09	6.09	6.09
			1472	1636.75	1554.38	52.05	48.69	50.37	72.09	63.22	67.655	90.77	90.77	90.77	11.89	11.89	11.89	6.09	6.09	6.09
			42.08	28.94	35.51	2.59	2.59	2.59	62.91	62.91	62.91	90.77	90.77	90.77	11.89	11.89	11.89	6.09	6.09	6.09
	Wildtype	mock	92.33	57.95	75.14	2.59	2.59	2.59	62.91	62.91	62.91	90.77	90.77	90.77	11.89	11.89	11.89	6.09	6.09	6.09
			63.22	35.67	49.445	2.59	2.59	2.59	62.91	62.91	62.91	90.77	90.77	90.77	11.89	11.89	11.89	6.09	6.09	6.09
			104.89	48.07	76.48	2.59	2.59	2.59	62.91	62.91	62.91	90.77	90.77	90.77	11.89	11.89	11.89	6.09	6.09	6.09
Old	Wildtype	S.aureus	74.09	91.95	83.02	2.76	2.76	2.76	62.91	62.91	62.91	90.77	90.77	90.77	11.89	11.89	11.89	6.09	6.09	6.09
			127.91	155.39	141.65	2.76	2.85	2.805	62.91	62.91	62.91	90.77	90.77	90.77	11.89	11.89	11.89	6.09	6.09	6.09
			81.65	74.65	78.15	2.76	2.76	2.76	62.91	62.91	62.91	90.77	90.77	90.77	11.89	11.89	11.89	6.09	6.09	6.09
			63.61	104.03	83.82	2.76	2.76	2.76	62.91	62.91	62.91	90.77	90.77	90.77	11.89	11.89	11.89	6.09	6.09	6.09
			193.57	138.44	166.005	2.76	2.76	2.76	62.91	62.91	62.91	90.77	90.77	90.77	11.89	11.89	11.89	6.09	6.09	6.09
	Wildtype	mock	90.41	79.42	84.915	2.76	2.76	2.76	62.91	62.91	62.91	90.77	90.77	90.77	11.89	11.89	11.89	6.09	6.09	6.09
			20.79	64.91	42.85	2.76	2.76	2.76	62.91	62.91	62.91	90.77	90.77	90.77	17.36	30.65	24.005	6.09	6.09	6.09
			113.29	97.03	105.16	12.25	6.83	9.54	62.91	62.91	62.91	90.77	90.77	90.77	11.89	11.89	11.89	6.09	6.09	6.09
			67.05	90.29	78.67	2.76	3.46	3.11	62.91	62.91	62.91	90.77	90.77	90.77	11.89	11.89	11.89	6.09	6.09	6.09
			86.99	78.34	82.665	2.76	2.76	2.76	62.91	62.91	62.91	90.77	90.77	90.77	11.89	11.89	11.89	6.09	6.09	6.09
