# Supplementary material for: Telomerase RNA component knockout exacerbates Staphylococcus aureus pneumonia by extensive inflammation and dysfunction of T cells
Source: eLife. 2024 Nov 28;13:RP100433. doi: 10.7554/eLife.100433 (PMC11604217; doi:10.7554/eLife.100433)
Supplement: Figure 2—source data 2. — Table of fragments per kilobase of transcript per million fragments mapped (fpkms) for all genes measured across the different mice cohorts. [file elife-100433-fig2-data2.xlsx]

## Sheet: heatmap_group
gene_id	Tercko/ko S. aureus	Tercko/ko mock	Young S. aureus	Young mock	Old S. aureus	Old mock	gene_name	gene_chr	gene_start	gene_end	gene_strand	gene_length	gene_biotype	gene_description	tf_family
ENSMUSG00000056071	3091.73	44.4075	81.494	58.1483	110.27	28.5372	S100a9	3	90692632	90695721	-	522	protein_coding	S100 calcium binding protein A9 (calgranulin B) [Source:MGI Symbol;Acc:MGI:1338947]	-
ENSMUSG00000092303	5.16115	0	2.35911	0.896129	0	0	Vmn1r-ps29	6	89997612	90004589	+	785	unprocessed_pseudogene	vomeronasal 1 receptor, pseudogene 29 [Source:MGI Symbol;Acc:MGI:3852367]	-
ENSMUSG00000031535	2.92499	0	0.547172	0.572218	0	0.0839931	Dkk4	8	22624043	22627547	+	1315	protein_coding	dickkopf WNT signaling pathway inhibitor 4 [Source:MGI Symbol;Acc:MGI:2385299]	-
ENSMUSG00000037953	1.33932	0	0.0558118	0.322177	0	0.120186	A4gnt	9	99612502	99622367	+	2757	protein_coding	alpha-1,4-N-acetylglucosaminyltransferase [Source:MGI Symbol;Acc:MGI:2143261]	-
ENSMUSG00000097311	0.657002	0	0.380144	0.166097	0.00757207	0.0665868	Gm26871	3	118430324	118530022	+	5308	processed_transcript	predicted gene, 26871 [Source:MGI Symbol;Acc:MGI:5477365]	-
ENSMUSG00000028965	57.5751	0.466659	1.41911	0.770233	0.435093	0.348089	Tnfrsf9	4	150914562	150946102	+	2722	protein_coding	tumor necrosis factor receptor superfamily, member 9 [Source:MGI Symbol;Acc:MGI:1101059]	-
ENSMUSG00000056054	1630.27	37.8324	36.4341	29.5266	52.2736	17.2058	S100a8	3	90668978	90670035	+	694	protein_coding	S100 calcium binding protein A8 (calgranulin A) [Source:MGI Symbol;Acc:MGI:88244]	-
ENSMUSG00000079597	22.5378	0.0779139	0.165277	0.400337	0.241387	0	Gm5483	16	36184212	36188111	+	1862	protein_coding	predicted gene 5483 [Source:MGI Symbol;Acc:MGI:3645124]	-
ENSMUSG00000022651	368.648	8.07134	10.5105	8.92074	9.38237	10.0407	Retnlg	16	48872621	48874496	+	593	protein_coding	resistin like gamma [Source:MGI Symbol;Acc:MGI:2667763]	-
ENSMUSG00000113216	3.65808	0.0028461	0.123884	0.653336	0.0383165	0.0201657	Gm40841	13	28394453	28420066	-	4254	lincRNA	predicted gene, 40841 [Source:MGI Symbol;Acc:MGI:5623726]	-
ENSMUSG00000044103	33.0733	0.398569	0.473051	0.178606	1.52196	0.684999	Il1f9	2	24186476	24193568	+	1648	protein_coding	interleukin 1 family, member 9 [Source:MGI Symbol;Acc:MGI:2449929]	-
ENSMUSG00000085329	7.61934	0.00710522	0.86258	0.618858	0.0239141	0.0839054	2810404F17Rik	16	95806029	95808317	-	1704	lincRNA	RIKEN cDNA 2810404F17 gene [Source:MGI Symbol;Acc:MGI:1917218]	-
ENSMUSG00000029417	8.48668	0.0281005	1.41007	0.262303	1.73842	0.49279	Cxcl9	5	92321347	92328079	-	3016	protein_coding	chemokine (C-X-C motif) ligand 9 [Source:MGI Symbol;Acc:MGI:1352449]	-
ENSMUSG00000033508	14.2045	0.0547842	0.961846	0.16837	0.27075	0.0369683	Asprv1	6	86628164	86629710	+	1547	protein_coding	aspartic peptidase, retroviral-like 1 [Source:MGI Symbol;Acc:MGI:1915105]	-
ENSMUSG00000052270	31.7461	0.249067	0.716788	0.271017	1.11044	0.308896	Fpr2	17	17887824	17893952	+	1296	protein_coding	formyl peptide receptor 2 [Source:MGI Symbol;Acc:MGI:1278319]	-
ENSMUSG00000059657	77.5666	1.25029	2.57067	5.8494	2.14988	1.23711	Stfa2l1	16	36156811	36161953	+	419	protein_coding	stefin A2 like 1 [Source:MGI Symbol;Acc:MGI:3524944]	-
ENSMUSG00000106874	41.9816	0.698012	1.63193	1.54198	2.91122	7.4933	Gm20186	6	18845910	18848207	-	1050	lincRNA	predicted gene, 20186 [Source:MGI Symbol;Acc:MGI:5012371]	-
ENSMUSG00000031762	46.675	0.0823626	0.61493	1.91949	0	0.67623	Mt2	8	94172664	94173568	+	588	protein_coding	metallothionein 2 [Source:MGI Symbol;Acc:MGI:97172]	-
ENSMUSG00000051439	329.564	14.0508	25.6193	15.5224	17.5479	30.1587	Cd14	18	36725074	36726736	-	1572	protein_coding	CD14 antigen [Source:MGI Symbol;Acc:MGI:88318]	-
ENSMUSG00000051748	102.234	3.44479	12.4539	4.90707	3.77324	1.39238	Wfdc21	11	83746940	83752642	+	434	protein_coding	WAP four-disulfide core domain 21 [Source:MGI Symbol;Acc:MGI:1913357]	-
ENSMUSG00000085183	10.2063	0	0.204703	0.154713	0	0	Wincr1	4	89050308	89084614	+	761	lincRNA	WNT induced non-coding RNA 1 [Source:MGI Symbol;Acc:MGI:3649757]	-
ENSMUSG00000019850	33.6606	1.45534	1.33138	1.17484	1.00062	0.988295	Tnfaip3	10	19000910	19015657	-	7226	protein_coding	tumor necrosis factor, alpha-induced protein 3 [Source:MGI Symbol;Acc:MGI:1196377]	-
ENSMUSG00000011179	285.37	23.8172	26.2941	31.8844	55.5602	61.8884	Odc1	12	17544794	17551505	+	3405	protein_coding	ornithine decarboxylase, structural 1 [Source:MGI Symbol;Acc:MGI:97402]	-
ENSMUSG00000033213	65.1095	2.18313	3.10307	1.66388	1.18812	0.881512	AA467197	2	122636986	122641191	+	1203	protein_coding	expressed sequence AA467197 [Source:MGI Symbol;Acc:MGI:3034182]	-
ENSMUSG00000030787	175.516	13.2569	6.02544	13.4995	13.7097	10.372	Lyve1	7	110850607	110863239	-	2919	protein_coding	lymphatic vessel endothelial hyaluronan receptor 1 [Source:MGI Symbol;Acc:MGI:2136348]	-
ENSMUSG00000020651	14.6375	0.287754	1.00792	0.0654788	0.0393209	0.11037	Slc26a4	12	31519827	31559969	-	3109	protein_coding	solute carrier family 26, member 4 [Source:MGI Symbol;Acc:MGI:1346029]	-
ENSMUSG00000084989	0	1.08307	1.83019	1.30158	5.69253	5.65013	Crocc2	1	93168725	93231072	+	7132	protein_coding	ciliary rootlet coiled-coil, rootletin family member 2 [Source:MGI Symbol;Acc:MGI:3045962]	-
ENSMUSG00000026822	1601.7	12.676	43.489	11.9799	9.76358	17.2528	Lcn2	2	32384633	32388252	-	2623	protein_coding	lipocalin 2 [Source:MGI Symbol;Acc:MGI:96757]	-
ENSMUSG00000038301	9.94427	1.28916	1.85371	1.88743	2.06531	2.60625	Snx10	6	51523901	51590679	+	9300	protein_coding	sorting nexin 10 [Source:MGI Symbol;Acc:MGI:1919232]	-
ENSMUSG00000021109	66.7671	5.9162	6.04255	6.26513	6.69233	5.23665	Hif1a	12	73901375	73947530	+	5896	protein_coding	hypoxia inducible factor 1, alpha subunit [Source:MGI Symbol;Acc:MGI:106918]	-
ENSMUSG00000025172	8.9934	0.12088	2.56094	1.97064	0.768086	0.336271	Ankrd2	19	42036038	42045110	+	1100	protein_coding	ankyrin repeat domain 2 (stretch responsive muscle) [Source:MGI Symbol;Acc:MGI:1861447]	-
ENSMUSG00000031765	3884.75	44.3738	90.2338	66.2858	108.841	83.2679	Mt1	8	94179082	94180327	+	1246	protein_coding	metallothionein 1 [Source:MGI Symbol;Acc:MGI:97171]	-
ENSMUSG00000054855	72.9504	3.93167	2.29485	2.98746	1.54401	1.08473	Rnd1	15	98663421	98677461	-	2967	protein_coding	Rho family GTPase 1 [Source:MGI Symbol;Acc:MGI:2444878]	-
ENSMUSG00000006818	90.0047	8.11278	8.70841	9.1696	12.8974	11.4022	Sod2	17	13006846	13040063	+	10008	protein_coding	superoxide dismutase 2, mitochondrial [Source:MGI Symbol;Acc:MGI:98352]	-
ENSMUSG00000103513	8.49316	0.0255159	0.273585	0.369074	0.0572527	0	Gm34780	3	65494087	65495035	-	949	TEC	predicted gene, 34780 [Source:MGI Symbol;Acc:MGI:5593939]	-
ENSMUSG00000032511	0.0107663	1.11802	1.00886	1.18658	7.1201	6.50518	Scn5a	9	119483408	119579016	-	8764	protein_coding	sodium channel, voltage-gated, type V, alpha [Source:MGI Symbol;Acc:MGI:98251]	-
ENSMUSG00000026166	43.896	0.0255608	0.236773	0.489494	1.24972	1.46555	Ccl20	1	83116766	83119167	+	1421	protein_coding	chemokine (C-C motif) ligand 20 [Source:MGI Symbol;Acc:MGI:1329031]	-
ENSMUSG00000064524	48.7032	0	0	13.8721	0.261215	0	Gm26441	X	151261918	151262021	-	104	snRNA	predicted gene, 26441 [Source:MGI Symbol;Acc:MGI:5456218]	-
ENSMUSG00000021025	463.365	46.591	49.2491	43.5718	37.1339	34.9398	Nfkbia	12	55489410	55492647	-	1610	protein_coding	nuclear factor of kappa light polypeptide gene enhancer in B cells inhibitor, alpha [Source:MGI Symbol;Acc:MGI:104741]	-
ENSMUSG00000054072	30.9076	8.95652	10.1527	11.6881	11.2337	9.21564	Iigp1	18	60376029	60392627	+	3121	protein_coding	interferon inducible GTPase 1 [Source:MGI Symbol;Acc:MGI:1926259]	-
ENSMUSG00000066196	0	3.2772	4.82649	3.4709	17.6848	11.2705	Spag8	4	43651335	43653594	-	1662	protein_coding	sperm associated antigen 8 [Source:MGI Symbol;Acc:MGI:3056295]	-
ENSMUSG00000031273	0.00788959	1.05194	1.51673	0.962434	3.07618	2.81985	Col4a6	X	141165403	141474076	-	7973	protein_coding	collagen, type IV, alpha 6 [Source:MGI Symbol;Acc:MGI:2152695]	-
ENSMUSG00000105703	34.1444	0.0313911	1.77276	1.05892	1.44559	1.00799	Gm43305	14	54292443	54297456	-	5014	processed_transcript	predicted gene 43305 [Source:MGI Symbol;Acc:MGI:5663442]	-
ENSMUSG00000058755	27.1116	0.950704	2.84651	0.725917	0.381734	0.119565	Osm	11	4236420	4241026	+	2272	protein_coding	oncostatin M [Source:MGI Symbol;Acc:MGI:104749]	-
ENSMUSG00000000982	318.593	1.95196	1.64714	0.9725	0.896458	0.0933256	Ccl3	11	83647844	83649355	-	766	protein_coding	chemokine (C-C motif) ligand 3 [Source:MGI Symbol;Acc:MGI:98260]	-
ENSMUSG00000081941	4.19078	0	0.27881	0.452396	0.0832277	0.436709	Gm11218	4	64856926	64858139	-	1214	processed_pseudogene	predicted gene 11218 [Source:MGI Symbol;Acc:MGI:3651636]	-
ENSMUSG00000026475	8.45433	0.16622	0.510872	0.186231	1.61793	0.911718	Rgs16	1	153740349	153745468	+	2339	protein_coding	regulator of G-protein signaling 16 [Source:MGI Symbol;Acc:MGI:108407]	-
ENSMUSG00000016496	13.4684	1.95652	3.40937	3.17792	4.92165	4.28056	Cd274	19	29367455	29388095	+	3622	protein_coding	CD274 antigen [Source:MGI Symbol;Acc:MGI:1926446]	-
ENSMUSG00000022199	0	1.28115	1.16425	0.908303	2.23766	1.55689	Slc22a17	14	54906304	54913132	-	4517	protein_coding	solute carrier family 22 (organic cation transporter), member 17 [Source:MGI Symbol;Acc:MGI:1926225]	-
ENSMUSG00000024647	1.58674	0	0.949478	0.200007	0.0679605	0.0494039	Cbln2	18	86711110	86718283	+	2894	protein_coding	cerebellin 2 precursor protein [Source:MGI Symbol;Acc:MGI:88282]	-
ENSMUSG00000035105	6.0479	0.133281	2.32806	0.382555	0.664256	1.41824	Egln3	12	54178981	54203860	-	2662	protein_coding	egl-9 family hypoxia-inducible factor 3 [Source:MGI Symbol;Acc:MGI:1932288]	-
ENSMUSG00000105199	1.68425	0	0.0328935	0.111266	0.0567362	0	Gm43581	3	104642994	104645857	+	2864	sense_intronic	predicted gene 43581 [Source:MGI Symbol;Acc:MGI:5663718]	-
ENSMUSG00000026073	32.871	1.13179	1.15081	0.581046	0.183928	0.199379	Il1r2	1	40074079	40125231	+	1908	protein_coding	interleukin 1 receptor, type II [Source:MGI Symbol;Acc:MGI:96546]	-
ENSMUSG00000114467	3.40467	0	0.221673	1.0464	0.333886	0.945198	Gm48430	14	10017223	10018671	-	1449	TEC	predicted gene, 48430 [Source:MGI Symbol;Acc:MGI:6097931]	-
ENSMUSG00000024222	12.2344	1.1411	2.58227	1.46545	1.29951	1.31476	Fkbp5	17	28399094	28517527	-	9468	protein_coding	FK506 binding protein 5 [Source:MGI Symbol;Acc:MGI:104670]	-
ENSMUSG00000033831	2.74561	0.00317777	0.010597	0	0	0.121358	Fgb	3	83040141	83049863	-	3810	protein_coding	fibrinogen beta chain [Source:MGI Symbol;Acc:MGI:99501]	-
ENSMUSG00000026773	23.2294	2.8506	3.18387	3.17223	5.26907	2.25784	Pfkfb3	2	11471433	11554077	-	7561	protein_coding	6-phosphofructo-2-kinase/fructose-2,6-biphosphatase 3 [Source:MGI Symbol;Acc:MGI:2181202]	-
ENSMUSG00000017064	4.66923	0	0.0253688	0.517001	0.0378817	0.78018	Prl5a1	13	28142484	28151611	+	1061	protein_coding	prolactin family 5, subfamily a, member 1 [Source:MGI Symbol;Acc:MGI:106332]	-
ENSMUSG00000097815	111.54	1.80663	3.16178	1.34749	3.44331	10.3285	Gm26809	6	18844220	18847360	+	2981	lincRNA	predicted gene, 26809 [Source:MGI Symbol;Acc:MGI:5477303]	-
ENSMUSG00000069816	1.82179	0	0.0266287	0.411627	0.0107505	0.0961583	Olfr23	11	73936677	73942658	+	2527	protein_coding	olfactory receptor 23 [Source:MGI Symbol;Acc:MGI:109312]	-
ENSMUSG00000048096	0.0796653	3.45028	5.14109	2.01652	2.61449	3.14981	Lmod1	1	135324807	135368065	+	3948	protein_coding	leiomodin 1 (smooth muscle) [Source:MGI Symbol;Acc:MGI:2135671]	-
ENSMUSG00000023067	85.2998	14.9414	14.0668	13.8625	6.0237	14.7973	Cdkn1a	17	29090976	29100727	+	3553	protein_coding	cyclin-dependent kinase inhibitor 1A (P21) [Source:MGI Symbol;Acc:MGI:104556]	-
ENSMUSG00000096630	0.669832	0	0.0653283	0.0503484	0.0516605	0.0328601	Vmn2r26	6	124024568	124065806	+	8067	protein_coding	vomeronasal 2, receptor 26 [Source:MGI Symbol;Acc:MGI:2678394]	-
ENSMUSG00000087684	7.48928	0.188904	1.28384	1.12152	0.289443	0.703921	1200007C13Rik	2	167827693	167833646	-	2455	lincRNA	RIKEN cDNA 1200007C13 gene [Source:MGI Symbol;Acc:MGI:1921369]	-
ENSMUSG00000032691	6.64377	0.174853	0.0782048	0.0071336	0.17277	0.182573	Nlrp3	11	59541568	59566956	+	4057	protein_coding	NLR family, pyrin domain containing 3 [Source:MGI Symbol;Acc:MGI:2653833]	-
ENSMUSG00000027399	22.6167	0.61707	0.76876	0.709001	0.30427	0.549709	Il1a	2	129299610	129309972	-	1974	protein_coding	interleukin 1 alpha [Source:MGI Symbol;Acc:MGI:96542]	-
ENSMUSG00000085375	5.24864	0	0.0834873	1.04864	0.260179	0.0177388	Gm12506	4	55605149	55636901	+	806	lincRNA	predicted gene 12506 [Source:MGI Symbol;Acc:MGI:3651170]	-
ENSMUSG00000001156	24.3562	2.77	3.05536	2.08803	2.58621	2.54243	Mxd1	6	86647042	86669161	-	7072	protein_coding	MAX dimerization protein 1 [Source:MGI Symbol;Acc:MGI:96908]	bHLH
ENSMUSG00000102297	4.44504	0	1.36836	0.703026	0	0.258113	5730585A16Rik	15	103058280	103059306	-	1027	TEC	RIKEN cDNA 5730585A16 gene [Source:MGI Symbol;Acc:MGI:1924346]	-
ENSMUSG00000109113	2.72627	0	0.466656	1.08499	0	0.506927	Gm32916	7	120593151	120629769	+	1638	lincRNA	predicted gene, 32916 [Source:MGI Symbol;Acc:MGI:5592075]	-
ENSMUSG00000042677	14.4206	0.414386	2.22387	0.870285	1.40654	1.35643	Zc3h12a	4	125118423	125127840	-	2882	protein_coding	zinc finger CCCH type containing 12A [Source:MGI Symbol;Acc:MGI:2385891]	-
ENSMUSG00000024011	2.39478	8.75351	8.24705	6.78069	3.14038	3.17644	Pi16	17	29318877	29329413	+	3987	protein_coding	peptidase inhibitor 16 [Source:MGI Symbol;Acc:MGI:1921366]	-
ENSMUSG00000021281	22.5845	2.29261	2.68911	2.01047	1.02518	2.50869	Tnfaip2	12	111442469	111455018	+	4984	protein_coding	tumor necrosis factor, alpha-induced protein 2 [Source:MGI Symbol;Acc:MGI:104960]	-
ENSMUSG00000025804	13.7609	0.398676	0.614403	0.503702	1.26994	0.855033	Ccr1	9	123962124	123968692	-	2833	protein_coding	chemokine (C-C motif) receptor 1 [Source:MGI Symbol;Acc:MGI:104618]	-
ENSMUSG00000046879	16.6804	5.04423	5.24697	6.29449	5.25727	5.68703	Irgm1	11	48861968	48871683	-	5810	protein_coding	immunity-related GTPase family M member 1 [Source:MGI Symbol;Acc:MGI:107567]	-
ENSMUSG00000028268	36.6568	9.85886	7.23254	11.1392	10.5373	9.79619	Gbp3	3	142560026	142573209	+	3265	protein_coding	guanylate binding protein 3 [Source:MGI Symbol;Acc:MGI:1926263]	-
ENSMUSG00000035356	27.5093	1.60086	3.45904	1.82071	2.44862	2.43542	Nfkbiz	16	55811375	55838899	-	5018	protein_coding	nuclear factor of kappa light polypeptide gene enhancer in B cells inhibitor, zeta [Source:MGI Symbol;Acc:MGI:1931595]	-
ENSMUSG00000084954	10.9192	0	0.501372	0.0599474	0.584667	1.89759	Gm16351	8	45547377	45605140	-	491	antisense	predicted gene 16351 [Source:MGI Symbol;Acc:MGI:3840153]	-
ENSMUSG00000030693	5.72405	0	0.156832	0.341928	0.547115	1.45934	Klk10	7	43781035	43785410	+	1373	protein_coding	kallikrein related-peptidase 10 [Source:MGI Symbol;Acc:MGI:1916790]	-
ENSMUSG00000103055	1.35383	0	0.0081614	0.199549	0.0533731	0	Gm38269	1	145323394	145326691	-	3298	TEC	predicted gene, 38269 [Source:MGI Symbol;Acc:MGI:5611497]	-
ENSMUSG00000046610	2.45789	0.0168578	0.029982	0.10587	0.0915094	0	Oacyl	18	65698268	65751601	+	3591	protein_coding	O-acyltransferase like [Source:MGI Symbol;Acc:MGI:2442915]	-
ENSMUSG00000094800	1.17835	14.9569	6.83866	11.7565	6.80242	7.24521	Gm9780	14	26027282	26042711	-	1402	protein_coding	predicted gene 9780 [Source:MGI Symbol;Acc:MGI:3710532]	-
ENSMUSG00000062391	1.10898	0	0	0.108888	0	0	4932435O22Rik	11	114413401	114448860	-	3496	lincRNA	RIKEN cDNA 4932435O22 gene [Source:MGI Symbol;Acc:MGI:2442791]	-
ENSMUSG00000032776	1.41959	0.0437864	0.239398	0.059339	0.151998	0.20439	Mctp2	7	72077830	72306608	-	12351	protein_coding	multiple C2 domains, transmembrane 2 [Source:MGI Symbol;Acc:MGI:2685335]	-
ENSMUSG00000022454	1.33146	0.0103703	0.0230546	0.0495778	0	0.0756837	Nell2	15	95075230	95528559	-	4670	protein_coding	NEL-like 2 [Source:MGI Symbol;Acc:MGI:1858510]	-
ENSMUSG00000054967	0	1.48959	2.32432	1.42584	0.442576	0.981207	Zfp647	15	76910371	76925448	-	2669	protein_coding	zinc finger protein 647 [Source:MGI Symbol;Acc:MGI:3052806]	zf-C2H2
ENSMUSG00000049015	0.939714	0	0.231056	0.143384	0.00370013	0	Olfr1467	19	13362236	13368054	+	3671	protein_coding	olfactory receptor 1467 [Source:MGI Symbol;Acc:MGI:3031301]	-
ENSMUSG00000022586	23.9416	1.68091	8.52115	1.1054	3.19728	3.9571	Ly6i	15	74979534	74983430	-	1156	protein_coding	lymphocyte antigen 6 complex, locus I [Source:MGI Symbol;Acc:MGI:1888480]	-
ENSMUSG00000117270	1.96948	0	1.50689	0.819148	0	0.0440374	AC144797.1	16	96097204	96114862	+	1948	lincRNA	novel transcript	-
ENSMUSG00000020227	11.4525	1.57282	4.73864	3.11096	1.43441	1.08941	Irak3	10	120141648	120202130	-	3676	protein_coding	interleukin-1 receptor-associated kinase 3 [Source:MGI Symbol;Acc:MGI:1921164]	-
ENSMUSG00000031411	3.66213	0.016015	0.465754	0.646401	0.0567733	0.170747	Prame	X	135613002	135627705	-	2268	protein_coding	preferentially expressed antigen in melanoma [Source:MGI Symbol;Acc:MGI:1923079]	-
ENSMUSG00000071637	86.9027	13.8945	18.343	21.2257	13.6572	11.887	Cebpd	16	15887286	15891031	+	3746	protein_coding	CCAAT/enhancer binding protein (C/EBP), delta [Source:MGI Symbol;Acc:MGI:103573]	-
ENSMUSG00000024772	108.975	27.7454	28.1169	24.9737	19.806	20.0835	Ehd1	19	6276725	6300096	+	3705	protein_coding	EH-domain containing 1 [Source:MGI Symbol;Acc:MGI:1341878]	-
ENSMUSG00000035385	33.9942	1.04817	3.14776	0.771467	0.87289	0.790266	Ccl2	11	82035571	82037453	+	1138	protein_coding	chemokine (C-C motif) ligand 2 [Source:MGI Symbol;Acc:MGI:98259]	-
ENSMUSG00000027737	3.1067	0.147704	0.159206	0.0874512	0.0680164	0.199739	Slc7a11	3	49892526	50443614	-	13922	protein_coding	solute carrier family 7 (cationic amino acid transporter, y+ system), member 11 [Source:MGI Symbol;Acc:MGI:1347355]	-
ENSMUSG00000090113	0	1.78401	1.39856	1.67078	6.17721	7.21277	Nhlrc4	17	25942233	25944961	-	2318	protein_coding	NHL repeat containing 4 [Source:MGI Symbol;Acc:MGI:3687200]	-
ENSMUSG00000032758	9.80079	0	0	0.040935	0	0	Kap	6	133849851	133853762	-	707	protein_coding	kidney androgen regulated protein [Source:MGI Symbol;Acc:MGI:96653]	-
ENSMUSG00000027398	134.818	3.07486	2.9622	0.909152	3.09041	1.95125	Il1b	2	129364570	129371139	-	1907	protein_coding	interleukin 1 beta [Source:MGI Symbol;Acc:MGI:96543]	-
ENSMUSG00000113910	5.74478	0	0.7168	2.13806	0	0	Gm48286	12	111616870	111637388	+	644	sense_overlapping	predicted gene, 48286 [Source:MGI Symbol;Acc:MGI:6097722]	-
ENSMUSG00000037443	195.174	20.2953	45.929	22.288	27.6155	29.0188	Cep85	4	134129858	134187112	-	5269	protein_coding	centrosomal protein 85 [Source:MGI Symbol;Acc:MGI:1917262]	-
ENSMUSG00000083345	3.74079	0	0.111815	0.508936	0.0829367	0	Gm6491	X	117525212	117526905	+	990	processed_pseudogene	predicted gene 6491 [Source:MGI Symbol;Acc:MGI:3644773]	-
ENSMUSG00000004951	621.311	114.257	76.6792	76.6473	56.4801	80.2216	Hspb1	5	135887919	135889563	+	1031	protein_coding	heat shock protein 1 [Source:MGI Symbol;Acc:MGI:96240]	-
ENSMUSG00000028793	40.9763	5.98922	9.72994	6.86192	7.5797	7.49014	Rnf19b	4	129058271	129085886	+	2872	protein_coding	ring finger protein 19B [Source:MGI Symbol;Acc:MGI:1922484]	-
ENSMUSG00000003469	1.38678	0.00416059	0.570019	0.427651	0.160942	0.947181	Phyhip	14	70457476	70468832	+	2910	protein_coding	phytanoyl-CoA hydroxylase interacting protein [Source:MGI Symbol;Acc:MGI:1860417]	-
ENSMUSG00000041565	1.95258	0.0646135	0.639907	0.323115	0.0628042	0.0544988	L3mbtl4	17	68273797	68780086	+	6080	protein_coding	L3MBTL4 histone methyl-lysine binding protein [Source:MGI Symbol;Acc:MGI:2444889]	zf-C2HC
ENSMUSG00000105504	11.0897	1.42222	0.936591	1.1898	1.75605	2.13848	Gbp5	3	142493978	142522344	+	6637	protein_coding	guanylate binding protein 5 [Source:MGI Symbol;Acc:MGI:2429943]	-
ENSMUSG00000087689	3.50648	0	0	0	0	0	Gm15845	16	36367070	36387406	+	996	antisense	predicted gene 15845 [Source:MGI Symbol;Acc:MGI:3801825]	-
ENSMUSG00000032000	36.3823	5.12248	5.11185	4.39044	5.30941	5.10058	Birc3	9	7848699	7873186	-	5009	protein_coding	baculoviral IAP repeat-containing 3 [Source:MGI Symbol;Acc:MGI:1197007]	-
ENSMUSG00000097994	15.376	1.54533	3.19722	3.55201	3.06377	1.61379	Gm26982	6	113714971	113716121	+	1151	antisense	predicted gene, 26982 [Source:MGI Symbol;Acc:MGI:5504097]	-
ENSMUSG00000022876	8.96829	1.20186	2.05887	0.896376	1.06123	0.43978	Samsn1	16	75858793	76022281	-	4935	protein_coding	SAM domain, SH3 domain and nuclear localization signals, 1 [Source:MGI Symbol;Acc:MGI:1914992]	-
ENSMUSG00000024403	0	1.48372	1.02737	1.57615	1.16978	0.979618	Atp6v1g2	17	35233660	35238767	+	2510	protein_coding	ATPase, H+ transporting, lysosomal V1 subunit G2 [Source:MGI Symbol;Acc:MGI:1913487]	-
ENSMUSG00000028270	51.8735	16.7256	13.3377	18.5696	17.0929	20.019	Gbp2	3	142620602	142638008	+	2516	protein_coding	guanylate binding protein 2 [Source:MGI Symbol;Acc:MGI:102772]	-
ENSMUSG00000087006	248.684	32.3146	19.1858	23.9743	14.1338	21.4601	Gm13889	2	93955810	93957201	-	1392	protein_coding	predicted gene 13889 [Source:MGI Symbol;Acc:MGI:3652053]	-
ENSMUSG00000015568	42.8281	10.9507	11.5087	8.7718	6.23536	7.84657	Lpl	8	68880491	68907448	+	10478	protein_coding	lipoprotein lipase [Source:MGI Symbol;Acc:MGI:96820]	-
ENSMUSG00000031779	25.3945	2.91281	11.5448	4.77016	1.36282	2.82445	Ccl22	8	94745590	94751699	+	2325	protein_coding	chemokine (C-C motif) ligand 22 [Source:MGI Symbol;Acc:MGI:1306779]	-
ENSMUSG00000058427	489.792	0.0234184	0.287188	0.0839681	0.0988429	0.223729	Cxcl2	5	90903871	90905938	+	2068	protein_coding	chemokine (C-X-C motif) ligand 2 [Source:MGI Symbol;Acc:MGI:1340094]	-
ENSMUSG00000029401	9.4778	2.34647	4.69275	3.01414	3.93155	4.98696	Rilpl2	5	124463265	124478366	-	3925	protein_coding	Rab interacting lysosomal protein-like 2 [Source:MGI Symbol;Acc:MGI:1933112]	-
ENSMUSG00000023903	0.891597	0.00684931	0.557572	0.218299	0.152323	0.246852	Mmp25	17	23628311	23645277	-	5303	protein_coding	matrix metallopeptidase 25 [Source:MGI Symbol;Acc:MGI:2443938]	-
ENSMUSG00000051341	18.0594	1.55269	1.10621	1.10628	1.32146	0.596003	Zfp52	17	21535539	21562601	+	3164	protein_coding	zinc finger protein 52 [Source:MGI Symbol;Acc:MGI:99199]	zf-C2H2
ENSMUSG00000102483	2.81199	0.00821112	0.535005	0.662508	0.0276362	0.0339377	Catspere1	1	177808550	177962233	+	2949	unprocessed_pseudogene	cation channel sperm associated auxiliary subunit epsilon 1 [Source:MGI Symbol;Acc:MGI:3647531]	-
ENSMUSG00000084946	3.22139	0.0222834	0.98288	0.270514	0	0.633828	Dlx1as	2	71516454	71537891	-	1630	antisense	distal-less homeobox 1, antisense [Source:MGI Symbol;Acc:MGI:1195983]	-
ENSMUSG00000110038	8.19755	0.0244592	0	1.4228	0.0823224	0	Gm45570	8	25594454	25595106	-	495	sense_intronic	predicted gene 45570 [Source:MGI Symbol;Acc:MGI:5791406]	-
ENSMUSG00000108080	5.10295	0.0343248	0.133995	0.611424	0.311357	0.21994	Gm10209	6	56797591	56799197	+	1607	TEC	predicted gene 10209 [Source:MGI Symbol;Acc:MGI:3641874]	-
ENSMUSG00000020250	35.0282	5.39683	6.03675	5.36857	12.8541	13.7473	Txnrd1	10	82833951	82897712	+	7086	protein_coding	thioredoxin reductase 1 [Source:MGI Symbol;Acc:MGI:1354175]	-
ENSMUSG00000078489	7.51158	0	0.234565	0.0641268	0.088779	1.49193	Gm17106	16	32985854	33108601	-	459	processed_transcript	predicted gene 17106 [Source:MGI Symbol;Acc:MGI:4937933]	-
ENSMUSG00000024235	11.5598	0.837293	0.984918	0.874127	0.966781	1.797	Map3k8	18	4331327	4353015	-	4504	protein_coding	mitogen-activated protein kinase kinase kinase 8 [Source:MGI Symbol;Acc:MGI:1346878]	-
ENSMUSG00000031504	40.8119	4.81153	2.86009	3.88371	4.53266	4.32929	Rab20	8	11453518	11478710	-	1392	protein_coding	RAB20, member RAS oncogene family [Source:MGI Symbol;Acc:MGI:102789]	-
ENSMUSG00000045835	1.93145	0	0.602699	0.435998	0	0	Hdgfl1	13	26768173	26770165	-	1993	protein_coding	hepatoma derived growth factor-like 1 [Source:MGI Symbol;Acc:MGI:1194493]	-
ENSMUSG00000107131	5.1763	0	2.02594	1.04167	0	0.0628	Gm43763	5	37807306	37808078	+	683	lincRNA	predicted gene 43763 [Source:MGI Symbol;Acc:MGI:5663900]	-
ENSMUSG00000071073	0	1.22694	2.11683	1.85796	2.76652	5.22483	Lrrc73	17	46253531	46257315	+	2898	protein_coding	leucine rich repeat containing 73 [Source:MGI Symbol;Acc:MGI:2684934]	-
ENSMUSG00000102448	1.00608	0.00330801	0.0257396	0.184565	0	0.198118	Gm37101	1	138567697	138571356	-	3660	TEC	predicted gene, 37101 [Source:MGI Symbol;Acc:MGI:5610329]	-
ENSMUSG00000037411	21.7641	2.01454	0.595052	2.18322	1.88827	1.42449	Serpine1	5	137061504	137072268	-	3876	protein_coding	serine (or cysteine) peptidase inhibitor, clade E, member 1 [Source:MGI Symbol;Acc:MGI:97608]	-
ENSMUSG00000030103	29.4215	5.7533	8.31599	5.12481	11.8676	9.59644	Bhlhe40	6	108660629	108666925	+	4705	protein_coding	basic helix-loop-helix family, member e40 [Source:MGI Symbol;Acc:MGI:1097714]	bHLH
ENSMUSG00000069011	9.04198	0.648374	3.24464	1.23637	3.1359	1.0307	Gm10254	3	54810384	54811250	-	867	processed_pseudogene	predicted gene 10254 [Source:MGI Symbol;Acc:MGI:3708673]	-
ENSMUSG00000029368	12.2383	0.867703	0.897408	0.633386	0.193981	0.733352	Alb	5	90460897	90476602	+	2342	protein_coding	albumin [Source:MGI Symbol;Acc:MGI:87991]	-
ENSMUSG00000059108	98.1118	5.3429	2.77338	3.41641	3.96558	3.88469	Ifitm6	7	141015699	141017924	-	905	protein_coding	interferon induced transmembrane protein 6 [Source:MGI Symbol;Acc:MGI:2686976]	-
ENSMUSG00000096352	35.3473	0	15.0451	0	0	0	Gm25708	1	144979484	144979585	-	102	miRNA	predicted gene, 25708 [Source:MGI Symbol;Acc:MGI:5455485]	-
ENSMUSG00000061878	30.7584	3.65489	2.84652	3.83439	5.81298	3.57993	Sphk1	11	116530925	116536674	+	4774	protein_coding	sphingosine kinase 1 [Source:MGI Symbol;Acc:MGI:1316649]	-
ENSMUSG00000032508	42.4537	8.91337	13.6279	12.7854	9.38137	11.0536	Myd88	9	119335934	119341411	-	2576	protein_coding	myeloid differentiation primary response gene 88 [Source:MGI Symbol;Acc:MGI:108005]	-
ENSMUSG00000015312	157.184	29.8711	22.1467	36.9481	30.9048	25.4535	Gadd45b	10	80930073	80932204	+	1589	protein_coding	growth arrest and DNA-damage-inducible 45 beta [Source:MGI Symbol;Acc:MGI:107776]	-
ENSMUSG00000020400	41.8004	5.23623	7.80353	3.60018	4.33741	5.43536	Tnip1	11	54910785	54962917	-	3539	protein_coding	TNFAIP3 interacting protein 1 [Source:MGI Symbol;Acc:MGI:1926194]	-
ENSMUSG00000097603	1.41005	0	0.498548	0.253471	0.00930568	0.252821	A430010J10Rik	6	67115673	67168426	+	4379	processed_transcript	RIKEN cDNA A430010J10 gene [Source:MGI Symbol;Acc:MGI:2442501]	-
ENSMUSG00000007035	0	0.614856	0.980464	0.431685	0.49297	0.385206	Msh5	17	35028605	35046745	-	5526	protein_coding	mutS homolog 5 [Source:MGI Symbol;Acc:MGI:1329021]	-
ENSMUSG00000089792	5.16226	0	0.0230054	1.49383	0.864825	0	Gm16571	6	131585110	131590261	+	585	transcribed_unprocessed_pseudogene	predicted gene 16571 [Source:MGI Symbol;Acc:MGI:4414991]	-
ENSMUSG00000025243	0.393273	0	0.0910037	0.119101	0.00865214	0.0491583	Slc6a20b	9	123590800	123632565	-	8538	protein_coding	solute carrier family 6 (neurotransmitter transporter), member 20B [Source:MGI Symbol;Acc:MGI:1336891]	-
ENSMUSG00000021010	3.09364	0.104645	0.343089	0.325143	0.0337329	0.0698707	Npas3	12	53248677	54072175	+	6007	protein_coding	neuronal PAS domain protein 3 [Source:MGI Symbol;Acc:MGI:1351610]	-
ENSMUSG00000107981	8.46115	0	0	0.064833	0	0	Gm6064	6	107093662	107094115	-	454	processed_pseudogene	predicted gene 6064 [Source:MGI Symbol;Acc:MGI:3645396]	-
ENSMUSG00000084386	12.7808	0	0	0	0	0.590805	Gm13852	6	32610119	32610360	+	242	processed_pseudogene	predicted gene 13852 [Source:MGI Symbol;Acc:MGI:3651754]	-
ENSMUSG00000080985	3.71711	0	0.403384	0.336497	0.117078	0	Gm13559	2	58740639	58741501	+	863	processed_pseudogene	predicted gene 13559 [Source:MGI Symbol;Acc:MGI:3651672]	-
ENSMUSG00000102981	2.07633	0.0105281	0	0.0251661	0.0701423	0	Gm38322	1	193493587	193495886	+	2300	TEC	predicted gene, 38322 [Source:MGI Symbol;Acc:MGI:5611550]	-
ENSMUSG00000036438	697.253	171.857	136.607	187.824	186.828	187.859	Calm2	17	87433412	87446935	-	1467	protein_coding	calmodulin 2 [Source:MGI Symbol;Acc:MGI:103250]	-
ENSMUSG00000097851	1.84725	0.00592914	0.166499	0.427388	0.147235	0	Platr30	3	96345287	96358480	+	2042	lincRNA	pluripotency associated transcript 30 [Source:MGI Symbol;Acc:MGI:4937214]	-
ENSMUSG00000026468	0.768829	0.00632786	0.907517	0.111439	0.0199689	0.044824	Lhx4	1	155698031	155751684	-	5740	protein_coding	LIM homeobox protein 4 [Source:MGI Symbol;Acc:MGI:101776]	Homeobox
ENSMUSG00000107021	2.24303	0	0.598579	0.442164	0	0	Gm42853	5	116456098	116457484	-	1387	TEC	predicted gene 42853 [Source:MGI Symbol;Acc:MGI:5662990]	-
ENSMUSG00000112136	11.6806	0	4.44814	1.02332	0.0409293	0	Gm40692	10	75034345	75035027	+	491	processed_pseudogene	predicted gene, 40692 [Source:MGI Symbol;Acc:MGI:5623577]	-
ENSMUSG00000037405	71.3976	7.71224	4.25175	5.26268	5.32416	4.10233	Icam1	9	21015985	21028817	+	4360	protein_coding	intercellular adhesion molecule 1 [Source:MGI Symbol;Acc:MGI:96392]	-
ENSMUSG00000030699	0	1.85738	2.22634	0.75592	0.471579	0.509369	Tbx6	7	126781483	126785560	+	1804	protein_coding	T-box 6 [Source:MGI Symbol;Acc:MGI:102539]	T-box
ENSMUSG00000110666	3.6469	0.0126911	4.73207	2.85761	0.294914	0.0231553	Gm9172	8	124765261	124766214	+	954	processed_pseudogene	predicted gene 9172 [Source:MGI Symbol;Acc:MGI:3647102]	-
ENSMUSG00000053113	33.8609	4.63355	3.75817	3.67609	3.90197	3.12279	Socs3	11	117966079	117970047	-	2891	protein_coding	suppressor of cytokine signaling 3 [Source:MGI Symbol;Acc:MGI:1201791]	-
ENSMUSG00000005763	0	0.675414	1.88098	0.347254	0.498867	0.468922	Cd247	1	165788681	165877277	+	5329	protein_coding	CD247 antigen [Source:MGI Symbol;Acc:MGI:88334]	-
ENSMUSG00000067869	16.934	1.01717	1.78686	6.95895	5.23773	3.9455	Tcea1-ps1	15	90882615	90883518	+	904	processed_pseudogene	transcription elongation factor A (SII) 1, pseudogene 1 [Source:MGI Symbol;Acc:MGI:1861432]	-
ENSMUSG00000025491	145.762	32.1243	92.353	30.8191	24.732	26.1592	Ifitm1	7	140967221	140969825	+	1094	protein_coding	interferon induced transmembrane protein 1 [Source:MGI Symbol;Acc:MGI:1915963]	-
ENSMUSG00000078722	1.79437	0.00361628	0.260873	0.061541	0	0	Gm12394	4	42781928	42856771	-	3348	protein_coding	predicted gene 12394 [Source:MGI Symbol;Acc:MGI:3649790]	-
ENSMUSG00000002233	285.904	69.6168	78.2438	70.1585	40.13	49.6161	Rhoc	3	104788375	104794459	+	1618	protein_coding	ras homolog family member C [Source:MGI Symbol;Acc:MGI:106028]	-
ENSMUSG00000035783	38.2767	129.385	211.213	124.431	165.686	150.856	Acta2	19	34241090	34255336	-	1781	protein_coding	actin, alpha 2, smooth muscle, aorta [Source:MGI Symbol;Acc:MGI:87909]	-
ENSMUSG00000022500	57.3741	13.0688	13.9419	12.3269	8.20244	11.8533	Litaf	16	10959275	11066157	-	5156	protein_coding	LPS-induced TN factor [Source:MGI Symbol;Acc:MGI:1929512]	zf-LITAF-like
ENSMUSG00000014498	0	0.39484	0.662035	0.214643	0.312247	0.327097	Ankrd52	10	128377115	128408704	+	8401	protein_coding	ankyrin repeat domain 52 [Source:MGI Symbol;Acc:MGI:2444029]	-
ENSMUSG00000069792	83.1696	4.40122	9.06712	1.91617	11.6537	7.08232	Wfdc17	11	83703991	83706268	+	533	protein_coding	WAP four-disulfide core domain 17 [Source:MGI Symbol;Acc:MGI:3649773]	-
ENSMUSG00000032487	9.83987	1.13625	1.21242	1.61139	3.61471	2.40878	Ptgs2	1	150100031	150108227	+	4580	protein_coding	prostaglandin-endoperoxide synthase 2 [Source:MGI Symbol;Acc:MGI:97798]	-
ENSMUSG00000022018	275.67	56.0541	46.638	56.0701	93.6906	51.6793	Rgcc	14	79288756	79301645	-	918	protein_coding	regulator of cell cycle [Source:MGI Symbol;Acc:MGI:1913464]	-
ENSMUSG00000048572	39.6242	7.24551	4.19043	5.89601	5.41316	3.42124	Tmem252	19	24674008	24679661	+	2462	protein_coding	transmembrane protein 252 [Source:MGI Symbol;Acc:MGI:3583948]	-
ENSMUSG00000042622	61.3492	10.4369	8.10397	9.09155	10.7258	10.6534	Maff	15	79346621	79359076	+	2594	protein_coding	v-maf musculoaponeurotic fibrosarcoma oncogene family, protein F (avian) [Source:MGI Symbol;Acc:MGI:96910]	TF_bZIP
ENSMUSG00000031167	54.076	13.7911	14.9854	13.106	26.0198	16.4412	Rbm3	X	8138975	8145880	-	4698	protein_coding	RNA binding motif (RNP1, RRM) protein 3 [Source:MGI Symbol;Acc:MGI:1099460]	-
ENSMUSG00000027115	1.52628	0.0793617	0.302136	0.202083	0.0975088	0.171704	Kif18a	2	109280738	109341747	+	9832	protein_coding	kinesin family member 18A [Source:MGI Symbol;Acc:MGI:2446977]	-
ENSMUSG00000025140	0	0.985708	1.03241	0.661468	0.691785	0.508057	Pycr1	11	120635712	120643769	-	3935	protein_coding	pyrroline-5-carboxylate reductase 1 [Source:MGI Symbol;Acc:MGI:2384795]	-
ENSMUSG00000036053	17.6515	4.03522	3.19037	3.15189	2.28679	1.78984	Fmnl2	2	52857860	53133804	+	5636	protein_coding	formin-like 2 [Source:MGI Symbol;Acc:MGI:1918659]	-
ENSMUSG00000054453	1.69965	0.00526176	0.677777	0.150931	0.147976	0.192005	Sytl5	X	9885622	9994543	+	2301	protein_coding	synaptotagmin-like 5 [Source:MGI Symbol;Acc:MGI:2668451]	-
ENSMUSG00000045594	0.0627364	2.28519	3.46312	3.48159	3.53799	3.52876	Glb1	9	114401076	114474898	+	3008	protein_coding	galactosidase, beta 1 [Source:MGI Symbol;Acc:MGI:88151]	-
ENSMUSG00000078578	25.2204	6.72422	6.96086	7.35882	7.34376	7.07652	Ube2d3	3	135438149	135468198	+	24499	protein_coding	ubiquitin-conjugating enzyme E2D 3 [Source:MGI Symbol;Acc:MGI:1913355]	-
ENSMUSG00000024659	243.392	52.8499	59.5794	58.9328	73.1645	85.0895	Anxa1	19	20373428	20390944	-	2608	protein_coding	annexin A1 [Source:MGI Symbol;Acc:MGI:96819]	-
ENSMUSG00000046223	54.4515	5.19919	5.52302	5.07266	3.01975	2.01073	Plaur	7	24462484	24475968	+	2617	protein_coding	plasminogen activator, urokinase receptor [Source:MGI Symbol;Acc:MGI:97612]	-
ENSMUSG00000020077	160.711	31.5427	29.178	28.8034	24.5004	21.3017	Srgn	10	62493833	62527451	-	2196	protein_coding	serglycin [Source:MGI Symbol;Acc:MGI:97756]	-
ENSMUSG00000021091	53.6607	10.4717	8.02386	10.0391	8.39204	7.81762	Serpina3n	12	104406729	104414329	+	2064	protein_coding	serine (or cysteine) peptidase inhibitor, clade A, member 3N [Source:MGI Symbol;Acc:MGI:105045]	-
ENSMUSG00000012428	29.5413	3.90831	4.20333	3.79621	2.73715	4.62713	Steap4	5	7960457	7982213	+	3155	protein_coding	STEAP family member 4 [Source:MGI Symbol;Acc:MGI:1923560]	-
ENSMUSG00000029915	6.80829	0.62836	0.449514	0.369628	0.448168	0.40346	Clec5a	6	40574894	40585821	-	3840	protein_coding	C-type lectin domain family 5, member a [Source:MGI Symbol;Acc:MGI:1345151]	-
ENSMUSG00000025383	4.68963	0.0628683	1.58284	1.02123	0.00604504	0.0190888	Il23a	10	128296139	128298752	-	2247	protein_coding	interleukin 23, alpha subunit p19 [Source:MGI Symbol;Acc:MGI:1932410]	-
ENSMUSG00000020407	23.6511	3.10215	4.67915	2.94229	1.2153	2.13364	Upp1	11	9118103	9136170	+	1961	protein_coding	uridine phosphorylase 1 [Source:MGI Symbol;Acc:MGI:1097668]	-
ENSMUSG00000028633	32.553	4.62185	4.65691	4.70934	4.17695	3.31671	Ctps	4	120539868	120570276	-	3316	protein_coding	cytidine 5'-triphosphate synthase [Source:MGI Symbol;Acc:MGI:1858304]	-
ENSMUSG00000023947	10.8331	1.24416	3.98044	1.82411	1.35775	1.97318	Nfkbie	17	45555703	45563169	+	3045	protein_coding	nuclear factor of kappa light polypeptide gene enhancer in B cells inhibitor, epsilon [Source:MGI Symbol;Acc:MGI:1194908]	-
ENSMUSG00000027199	0.0419218	2.02749	2.87892	0.966157	1.79504	1.31772	Gatm	2	122594467	122611303	-	3001	protein_coding	glycine amidinotransferase (L-arginine:glycine amidinotransferase) [Source:MGI Symbol;Acc:MGI:1914342]	-
ENSMUSG00000104104	4.14007	0.0953546	0.322408	0.23563	0.0669706	0.0489262	Gm37877	1	99847984	99850692	+	2709	TEC	predicted gene, 37877 [Source:MGI Symbol;Acc:MGI:5611105]	-
ENSMUSG00000072620	101.117	22.5923	28.398	14.6803	17.309	14.1601	Slfn2	11	83065112	83070678	+	1664	protein_coding	schlafen 2 [Source:MGI Symbol;Acc:MGI:1313258]	-
ENSMUSG00000025900	0.00766433	0.416389	0.661102	0.495917	1.65918	1.62284	Rp1	1	3999557	4409241	-	12311	protein_coding	retinitis pigmentosa 1 (human) [Source:MGI Symbol;Acc:MGI:1341105]	-
ENSMUSG00000029420	0.625782	0.0208171	0.196812	0.190597	0.053855	0.0750028	Rimbp2	5	128757791	128953486	-	7935	protein_coding	RIMS binding protein 2 [Source:MGI Symbol;Acc:MGI:2443235]	-
ENSMUSG00000044676	0.0103409	0.732628	0.419439	1.03496	1.45053	2.23652	Zfp612	8	110079746	110092741	+	6083	protein_coding	zinc finger protein 612 [Source:MGI Symbol;Acc:MGI:2443465]	zf-C2H2
ENSMUSG00000046101	0.900259	0.00204654	0.0318482	0.263934	0.0365478	0	Mcmdc2	1	9908638	9942085	+	5916	protein_coding	minichromosome maintenance domain containing 2 [Source:MGI Symbol;Acc:MGI:3045334]	-
ENSMUSG00000078671	4.6907	1.31498	1.52199	1.88081	2.10501	1.53022	Chd2	7	73426638	73541830	-	14300	protein_coding	chromodomain helicase DNA binding protein 2 [Source:MGI Symbol;Acc:MGI:2448567]	-
ENSMUSG00000108522	1.71252	0	0.727846	0.196385	0	0	Gm44664	7	122362000	122363785	+	1786	TEC	predicted gene 44664 [Source:MGI Symbol;Acc:MGI:5753240]	-
ENSMUSG00000024737	8.06591	0.712879	1.32774	0.621746	0.638959	0.318567	Slc15a3	19	10839727	10859362	+	5491	protein_coding	solute carrier family 15, member 3 [Source:MGI Symbol;Acc:MGI:1929691]	-
ENSMUSG00000038895	0.308452	2.26126	3.76568	1.46307	2.33345	2.99532	Zfp653	9	22055411	22071376	-	4938	protein_coding	zinc finger protein 653 [Source:MGI Symbol;Acc:MGI:2442362]	zf-C2H2
ENSMUSG00000112144	4.19534	0	0	0	0	0.600449	Gm47861	6	129238276	129248328	+	699	lincRNA	predicted gene, 47861 [Source:MGI Symbol;Acc:MGI:6097076]	-
ENSMUSG00000025420	0	0.74098	1.09675	0.843972	2.42387	2.79556	Katnal2	18	76977148	77047308	-	4061	protein_coding	katanin p60 subunit A-like 2 [Source:MGI Symbol;Acc:MGI:1924234]	-
ENSMUSG00000099875	16.4917	1.09893	4.37508	2.50914	3.22387	5.67866	Rbm3-ps	1	150265535	150265999	-	465	processed_pseudogene	RNA binding motif (RNP1, RRM) protein 3 [Source:MGI Symbol;Acc:MGI:3642874]	-
ENSMUSG00000038068	19.7698	4.17573	3.11737	4.38651	3.80947	3.48727	Rnf144b	13	47122656	47247991	+	4936	protein_coding	ring finger protein 144B [Source:MGI Symbol;Acc:MGI:2384986]	-
ENSMUSG00000089929	29.4856	3.44256	10.4463	2.95811	4.11288	4.25254	Bcl2a1b	9	89199209	89207827	+	817	protein_coding	B cell leukemia/lymphoma 2 related protein A1b [Source:MGI Symbol;Acc:MGI:1278326]	-
ENSMUSG00000017009	156.231	34.8291	39.5171	38.0102	39.9105	49.6696	Sdc4	2	164424247	164443887	-	2547	protein_coding	syndecan 4 [Source:MGI Symbol;Acc:MGI:1349164]	-
ENSMUSG00000020089	12.1359	3.54934	5.40033	3.38809	4.22694	5.74679	Ppa1	10	61648552	61674168	+	2902	protein_coding	pyrophosphatase (inorganic) 1 [Source:MGI Symbol;Acc:MGI:97831]	-
ENSMUSG00000030116	2.97313	12.5681	10.1729	12.092	5.57279	7.39168	Mfap5	6	122505845	122529290	+	3589	protein_coding	microfibrillar associated protein 5 [Source:MGI Symbol;Acc:MGI:1354387]	-
ENSMUSG00000022126	26.2118	0.00461582	0.485329	0.255365	0.218772	0.1937	Acod1	14	103046977	103056573	+	2623	protein_coding	aconitate decarboxylase 1 [Source:MGI Symbol;Acc:MGI:103206]	-
ENSMUSG00000046688	31.5982	4.03907	2.68351	2.73168	4.20925	3.89624	Tifa	3	127789805	127832164	+	3199	protein_coding	TRAF-interacting protein with forkhead-associated domain [Source:MGI Symbol;Acc:MGI:2182965]	-
ENSMUSG00000044786	76.0461	17.7461	17.9891	33.6328	20.6885	24.4896	Zfp36	7	28376784	28380253	-	3470	protein_coding	zinc finger protein 36 [Source:MGI Symbol;Acc:MGI:99180]	-
ENSMUSG00000020611	29.0589	7.60793	4.7018	8.1359	7.17974	7.07127	Gna13	11	109362831	109401369	+	6421	protein_coding	guanine nucleotide binding protein, alpha 13 [Source:MGI Symbol;Acc:MGI:95768]	-
ENSMUSG00000103744	13.8922	0	0	0	0	0	Gm38238	1	152292183	152292528	-	346	TEC	predicted gene, 38238 [Source:MGI Symbol;Acc:MGI:5611466]	-
ENSMUSG00000020255	0.453925	0.0900113	0.127801	0.110658	0.0913598	0.10273	D10Wsu102e	10	83360221	83488505	+	123179	protein_coding	DNA segment, Chr 10, Wayne State University 102, expressed [Source:MGI Symbol;Acc:MGI:106381]	-
ENSMUSG00000027998	17.3119	5.43381	7.04809	8.41214	6.67065	7.47853	Plrg1	3	83055522	83072355	+	2816	protein_coding	pleiotropic regulator 1 [Source:MGI Symbol;Acc:MGI:1858197]	-
ENSMUSG00000088340	21.8075	0	0	1.81773	0.576969	6.18518	Gm22338	2	61492766	61492894	+	129	snoRNA	predicted gene, 22338 [Source:MGI Symbol;Acc:MGI:5452115]	-
ENSMUSG00000032688	6.82092	0.864725	1.00715	0.603859	1.12905	0.869503	Malt1	18	65430962	65478823	+	11735	protein_coding	MALT1 paracaspase [Source:MGI Symbol;Acc:MGI:2445027]	-
ENSMUSG00000035694	0	0.902663	1.48063	0.973407	2.19602	1.91967	Caps2	10	112163621	112216555	+	3422	protein_coding	calcyphosphine 2 [Source:MGI Symbol;Acc:MGI:2441980]	-
ENSMUSG00000100550	0.721865	0	0.110403	0.310808	0.0332996	0.0191185	2310039L15Rik	10	95336276	95366202	+	4487	lincRNA	RIKEN cDNA 2310039L15 gene [Source:MGI Symbol;Acc:MGI:1916879]	-
ENSMUSG00000029790	0.0442183	1.40504	1.38779	0.910496	1.58029	1.73946	Cep41	6	30653457	30693749	-	4979	protein_coding	centrosomal protein 41 [Source:MGI Symbol;Acc:MGI:1891414]	-
ENSMUSG00000049288	47.3172	12.3256	14.1103	13.8659	9.04301	10.1969	Lix1l	3	96601149	96626171	+	3620	protein_coding	Lix1-like [Source:MGI Symbol;Acc:MGI:3036267]	-
ENSMUSG00000048520	0	0.572848	1.06059	0.876838	3.03176	2.67964	Fbxl13	5	21483847	21645634	-	5439	protein_coding	F-box and leucine-rich repeat protein 13 [Source:MGI Symbol;Acc:MGI:2443416]	-
ENSMUSG00000097124	0	1.46913	1.07327	1.61317	5.31522	4.75704	A530020G20Rik	3	121531619	121536206	+	3773	antisense	RIKEN cDNA A530020G20 gene [Source:MGI Symbol;Acc:MGI:2442825]	-
ENSMUSG00000041235	4.72693	1.65068	1.82871	1.33255	1.38771	1.49429	Chd7	4	8690406	8867659	+	13786	protein_coding	chromodomain helicase DNA binding protein 7 [Source:MGI Symbol;Acc:MGI:2444748]	-
ENSMUSG00000027995	14.2986	1.50839	1.62895	0.685047	0.916982	1.05461	Tlr2	3	83836272	83841767	-	3014	protein_coding	toll-like receptor 2 [Source:MGI Symbol;Acc:MGI:1346060]	-
ENSMUSG00000050930	0	0.811656	1.18504	1.31061	0.821115	0.801941	Map10	8	125669818	125673359	+	3542	protein_coding	microtubule-associated protein 10 [Source:MGI Symbol;Acc:MGI:1921643]	-
ENSMUSG00000029380	96.8698	0.133299	0.0984542	0.257994	0.130426	0.486551	Cxcl1	5	90891241	90893115	+	1875	protein_coding	chemokine (C-X-C motif) ligand 1 [Source:MGI Symbol;Acc:MGI:108068]	-
ENSMUSG00000049971	0	0.694134	1.13044	0.745527	0.654005	0.441112	Glt1d1	5	127632262	127709374	+	4378	protein_coding	glycosyltransferase 1 domain containing 1 [Source:MGI Symbol;Acc:MGI:2442755]	-
ENSMUSG00000091635	0.432881	0	0.040713	0.10416	0.0140632	0	Vmn2r13	5	109152940	109192199	-	5716	protein_coding	vomeronasal 2, receptor 13 [Source:MGI Symbol;Acc:MGI:3761379]	-
ENSMUSG00000029675	5.0124	23.6069	12.9812	13.2242	3.30443	12.0855	Eln	5	134702593	134747323	-	8098	protein_coding	elastin [Source:MGI Symbol;Acc:MGI:95317]	-
ENSMUSG00000024521	38.2582	9.04957	4.89106	6.69041	9.65285	4.2931	Pmaip1	18	66458604	66465550	+	2646	protein_coding	phorbol-12-myristate-13-acetate-induced protein 1 [Source:MGI Symbol;Acc:MGI:1930146]	-
ENSMUSG00000024360	74.1694	19.5811	20.837	21.299	23.5838	22.0791	Etf1	18	34902785	34932007	-	3709	protein_coding	eukaryotic translation termination factor 1 [Source:MGI Symbol;Acc:MGI:2385071]	-
ENSMUSG00000106710	0.586305	0	0	0.125572	0.0375005	0.0807132	Gm43166	5	131130021	131134711	-	4379	sense_intronic	predicted gene 43166 [Source:MGI Symbol;Acc:MGI:5663303]	-
ENSMUSG00000005413	53.3229	10.9684	24.5755	12.7881	11.8095	12.8698	Hmox1	8	75093621	75100589	+	1751	protein_coding	heme oxygenase 1 [Source:MGI Symbol;Acc:MGI:96163]	-
ENSMUSG00000104508	1.982	0.00861117	0.268096	0.0617518	0	0.101689	Gm37735	1	68639424	68640829	-	1406	TEC	predicted gene, 37735 [Source:MGI Symbol;Acc:MGI:5610963]	-
ENSMUSG00000005686	8.71167	1.50185	1.15845	0.980888	1.44795	1.39192	Ampd3	7	110768206	110812405	+	5627	protein_coding	adenosine monophosphate deaminase 3 [Source:MGI Symbol;Acc:MGI:1096344]	-
ENSMUSG00000110901	2.56969	0	0.950975	0.10362	0.0932541	0.22414	Gm48393	9	26719838	26731861	-	1293	lincRNA	predicted gene, 48393 [Source:MGI Symbol;Acc:MGI:6097876]	-
ENSMUSG00000111424	1.93287	0.0260372	0.0926152	0.624492	0.0376151	0	Gm48478	9	22228978	22231302	+	2325	TEC	predicted gene, 48478 [Source:MGI Symbol;Acc:MGI:6097993]	-
ENSMUSG00000029762	26.4806	6.59902	13.3938	7.38003	18.1499	20.2896	Akr1b8	6	34354119	34368463	+	1499	protein_coding	aldo-keto reductase family 1, member B8 [Source:MGI Symbol;Acc:MGI:107673]	-
ENSMUSG00000020010	14.5834	2.46332	6.38905	2.04398	4.43854	3.16829	Vnn3	10	23851462	23869843	+	1811	protein_coding	vanin 3 [Source:MGI Symbol;Acc:MGI:1347055]	-
ENSMUSG00000048997	0	0.629853	0.602956	0.710022	0.8884	0.594638	Atxn7l2	3	108202222	108210934	-	4946	protein_coding	ataxin 7-like 2 [Source:MGI Symbol;Acc:MGI:1919772]	-
ENSMUSG00000108311	1.04726	0	0.0342883	0.117634	0.0256003	0.187602	Gm44737	7	73630617	73638088	+	2355	lincRNA	predicted gene 44737 [Source:MGI Symbol;Acc:MGI:5753313]	-
ENSMUSG00000050370	22.7575	1.04914	3.28731	1.1904	2.55952	3.06421	Ch25h	19	34473786	34475135	-	1350	protein_coding	cholesterol 25-hydroxylase [Source:MGI Symbol;Acc:MGI:1333869]	-
ENSMUSG00000012819	0.262952	0.0035738	0.203558	0.195959	0.0669337	0.0543778	Cdh23	10	60302748	60696490	-	16939	protein_coding	cadherin 23 (otocadherin) [Source:MGI Symbol;Acc:MGI:1890219]	-
ENSMUSG00000111020	4.2771	0	0.581914	0.431203	0.026686	0.238696	Gm1715	9	52679863	52798774	+	1018	lincRNA	predicted gene 1715 [Source:MGI Symbol;Acc:MGI:2686561]	-
ENSMUSG00000034595	14.2322	3.8117	6.9912	3.64133	2.94026	1.63936	Ppp1r18	17	35865593	35875596	+	4317	protein_coding	protein phosphatase 1, regulatory subunit 18 [Source:MGI Symbol;Acc:MGI:1923698]	-
ENSMUSG00000110467	4.78637	0	0.124844	0.397255	0.0504015	0	Gm45781	8	123727772	123735142	-	539	lincRNA	predicted gene 45781 [Source:MGI Symbol;Acc:MGI:5804896]	-
ENSMUSG00000037982	1.04126	0	0.225799	0.133246	0.0237468	0	Gm9725	8	81013576	81061195	+	2860	antisense	predicted gene 9725 [Source:MGI Symbol;Acc:MGI:3646552]	-
ENSMUSG00000114174	7.80595	0	0	0.0916953	0	0	Cycs-ps3	13	94053843	94054388	+	321	processed_pseudogene	cytochrome c, pseudogene 3 [Source:MGI Symbol;Acc:MGI:109498]	-
ENSMUSG00000082117	1.08663	0	0.847471	0.0396996	0	0	Gm4994	X	131847887	131850073	-	2187	processed_pseudogene	predicted gene 4994 [Source:MGI Symbol;Acc:MGI:3645787]	-
ENSMUSG00000108122	1.8953	0	0.620087	0.113866	0.026721	0.0656278	Gm44116	6	100660939	100662463	-	1525	TEC	predicted gene, 44116 [Source:MGI Symbol;Acc:MGI:5690508]	-
ENSMUSG00000067656	2.16141	0	0.0187614	0.244822	0	0	Slc22a27	19	7864388	7966027	-	2152	protein_coding	solute carrier family 22, member 27 [Source:MGI Symbol;Acc:MGI:3042283]	-
ENSMUSG00000116946	10.8327	1.1647	0.648514	0.475287	1.31305	0.322909	AC130815.2	16	31233590	31248313	+	4634	lincRNA	novel transcript	-
ENSMUSG00000035021	7.51364	2.23261	4.60034	2.59897	1.48814	1.24466	Baz1a	12	54892989	55014348	-	7159	protein_coding	bromodomain adjacent to zinc finger domain 1A [Source:MGI Symbol;Acc:MGI:1309478]	-
ENSMUSG00000035671	5.58066	0.639519	1.29756	1.06675	1.5681	2.41523	Zswim4	8	84210678	84237055	-	4625	protein_coding	zinc finger SWIM-type containing 4 [Source:MGI Symbol;Acc:MGI:2443726]	-
ENSMUSG00000031780	62.1066	8.06644	20.4884	13.5739	8.95877	20.4325	Ccl17	8	94810453	94812036	+	514	protein_coding	chemokine (C-C motif) ligand 17 [Source:MGI Symbol;Acc:MGI:1329039]	-
ENSMUSG00000092260	0	1.23193	2.06248	1.24011	3.01607	1.34877	Zfp963	8	69741639	69749970	-	2299	protein_coding	zinc finger protein 963 [Source:MGI Symbol;Acc:MGI:4867078]	zf-C2H2
ENSMUSG00000103808	1.79836	0	0.0561458	0.146909	0.0340005	0	Gm37060	1	157404325	157406721	-	2397	TEC	predicted gene, 37060 [Source:MGI Symbol;Acc:MGI:5610288]	-
ENSMUSG00000047799	3.15536	0.0183351	0.958305	0.757784	0.0850062	0.263041	Oog4	4	143437164	143450324	-	1981	protein_coding	oogenesin 4 [Source:MGI Symbol;Acc:MGI:2684051]	-
ENSMUSG00000097176	4.35905	0	0	0.672819	0	0	Gm26830	11	95669952	95672719	+	993	lincRNA	predicted gene, 26830 [Source:MGI Symbol;Acc:MGI:5477324]	-
ENSMUSG00000030413	31.0841	5.1787	32.4977	5.35109	6.94176	6.74518	Pglyrp1	7	18871331	18890459	+	1837	protein_coding	peptidoglycan recognition protein 1 [Source:MGI Symbol;Acc:MGI:1345092]	-
ENSMUSG00000092467	1.53863	0	0.0353232	0.0189902	0.00891286	0	Gm18360	7	85516723	85519417	+	1524	unprocessed_pseudogene	predicted gene, 18360 [Source:MGI Symbol;Acc:MGI:5010545]	-
ENSMUSG00000102786	3.03206	0.027769	0.17646	0.0999448	0.0257488	0.202662	Gm38252	3	51884276	51886891	-	2616	TEC	predicted gene, 38252 [Source:MGI Symbol;Acc:MGI:5611480]	-
ENSMUSG00000034675	14.1901	2.47321	2.10737	1.30358	0.887779	1.52349	Dbn1	13	55473429	55488111	-	4514	protein_coding	drebrin 1 [Source:MGI Symbol;Acc:MGI:1931838]	-
ENSMUSG00000115575	5.00952	0.0727894	3.01723	0.696965	0.237903	0.671784	Gm49024	14	34661707	34662704	+	998	lincRNA	predicted gene, 49024 [Source:MGI Symbol;Acc:MGI:6118390]	-
ENSMUSG00000029134	4.04967	0.798716	1.12582	0.603296	1.1274	0.89813	Plb1	5	32232708	32366520	+	11660	protein_coding	phospholipase B1 [Source:MGI Symbol;Acc:MGI:1922406]	-
ENSMUSG00000082945	5.38272	0	0	0.339625	0	0.0733204	Gm11540	11	94607402	94609036	+	780	unprocessed_pseudogene	predicted gene 11540 [Source:MGI Symbol;Acc:MGI:3651617]	-
ENSMUSG00000071204	2.86726	0	0	0.0805663	0.0466798	0	Gm10319	6	122136628	122152016	+	1443	transcribed_unprocessed_pseudogene	predicted pseudogene 10319 [Source:MGI Symbol;Acc:MGI:3643520]	-
ENSMUSG00000111360	1.63532	0	0.461971	0.0230056	0.00539873	0.149258	Gm38642	9	120193089	120280327	+	2516	lincRNA	predicted gene, 38642 [Source:MGI Symbol;Acc:MGI:5621527]	-
ENSMUSG00000056529	4.17001	0.36944	1.35878	0.815043	0.750675	0.562393	Ptafr	4	132564067	132582683	+	3637	protein_coding	platelet-activating factor receptor [Source:MGI Symbol;Acc:MGI:106066]	-
ENSMUSG00000047989	31.5567	10.2091	9.31734	8.84505	9.67744	10.2908	Ino80c	18	24104757	24121953	-	2828	protein_coding	INO80 complex subunit C [Source:MGI Symbol;Acc:MGI:2443014]	-
ENSMUSG00000085315	2.5429	0	0	0.118265	0	0.296599	A430018G15Rik	2	52425012	52434885	+	1713	processed_transcript	RIKEN cDNA A430018G15 gene [Source:MGI Symbol;Acc:MGI:3040796]	-
ENSMUSG00000030790	29.3889	2.985	2.94221	4.49078	0.704362	0.956855	Adm	7	110627661	110629820	+	1619	protein_coding	adrenomedullin [Source:MGI Symbol;Acc:MGI:108058]	-
ENSMUSG00000036962	0	0.919275	1.43718	1.29356	4.73777	4.60496	Cfap221	1	119923341	119997234	-	2915	protein_coding	cilia and flagella associated protein 221 [Source:MGI Symbol;Acc:MGI:2684947]	-
ENSMUSG00000096794	0.970491	0	0.0994404	0.104996	0	0.0897772	Olfr905	9	38471107	38477013	+	4429	protein_coding	olfactory receptor 905 [Source:MGI Symbol;Acc:MGI:3030739]	-
ENSMUSG00000086548	2.40421	0	0.15864	0.260386	0.107464	0	Gm12972	4	130786069	130787855	+	1006	lincRNA	predicted gene 12972 [Source:MGI Symbol;Acc:MGI:3650043]	-
ENSMUSG00000024299	2.02213	15.3746	7.42735	6.17159	8.25814	7.64551	Adamts10	17	33524204	33553782	+	5453	protein_coding	a disintegrin-like and metallopeptidase (reprolysin type) with thrombospondin type 1 motif, 10 [Source:MGI Symbol;Acc:MGI:2449112]	-
ENSMUSG00000057531	17.6478	5.84303	5.78192	7.79426	5.86382	7.15694	Dtnbp1	13	44922075	45002147	-	3728	protein_coding	dystrobrevin binding protein 1 [Source:MGI Symbol;Acc:MGI:2137586]	-
ENSMUSG00000024404	87.0291	20.5725	14.9296	21.0179	21.8997	15.5994	Riok3	18	12128850	12157367	+	3661	protein_coding	RIO kinase 3 [Source:MGI Symbol;Acc:MGI:1914128]	-
ENSMUSG00000043126	1.519	0.0144049	0.37179	0.165464	0.0298874	0.144405	D830039M14Rik	10	61473576	61476937	-	3362	antisense	RIKEN cDNA D830039M14 gene [Source:MGI Symbol;Acc:MGI:2445111]	-
ENSMUSG00000038059	55.2387	12.6361	10.1576	17.3292	13.5378	14.7501	Smim3	18	60474193	60501983	-	1984	protein_coding	small integral membrane protein 3 [Source:MGI Symbol;Acc:MGI:1917088]	-
ENSMUSG00000101449	2.70047	0	0.783773	0.116673	0.0452471	0	Gm17791	7	41325815	41327315	-	1501	processed_pseudogene	predicted gene, 17791 [Source:MGI Symbol;Acc:MGI:5009973]	-
ENSMUSG00000036478	76.1675	20.8631	30.328	23.1132	22.3702	25.206	Btg1	10	96617006	96622809	+	5276	protein_coding	B cell translocation gene 1, anti-proliferative [Source:MGI Symbol;Acc:MGI:88215]	-
ENSMUSG00000085067	1.30369	0	0.0631663	0.149842	0.0164994	0.0586924	Gm15631	6	105673064	105677581	-	2436	lincRNA	predicted gene 15631 [Source:MGI Symbol;Acc:MGI:3783075]	-
ENSMUSG00000039021	0.0443123	1.45336	2.35523	2.34936	8.59023	7.68433	Ttc16	2	32757026	32775633	-	6388	protein_coding	tetratricopeptide repeat domain 16 [Source:MGI Symbol;Acc:MGI:2443048]	-
ENSMUSG00000038357	43.1157	0.0159727	0.525252	0.840627	0.214302	0	Camp	9	109847379	109849617	-	758	protein_coding	cathelicidin antimicrobial peptide [Source:MGI Symbol;Acc:MGI:108443]	-
ENSMUSG00000087644	1.3662	0	0.00739459	0.2136	0.129842	0	Gm14703	X	7651106	7657258	-	1820	antisense	predicted gene 14703 [Source:MGI Symbol;Acc:MGI:3705165]	-
ENSMUSG00000038587	71.7763	16.7888	11.172	19.9981	9.38753	6.68083	Akap12	10	4266380	4359470	+	6461	protein_coding	A kinase (PRKA) anchor protein (gravin) 12 [Source:MGI Symbol;Acc:MGI:1932576]	-
ENSMUSG00000001506	3.19712	14.9069	9.26303	7.87331	3.70175	3.20533	Col1a1	11	94936224	94953042	+	6563	protein_coding	collagen, type I, alpha 1 [Source:MGI Symbol;Acc:MGI:88467]	-
ENSMUSG00000030587	30.2437	7.66129	9.17553	8.22733	8.46357	5.20784	2200002D01Rik	7	29246561	29248466	-	1564	protein_coding	RIKEN cDNA 2200002D01 gene [Source:MGI Symbol;Acc:MGI:1919525]	-
ENSMUSG00000066626	4.5996	0	0.128786	0.093889	0	0	Gm5121	9	57334128	57334754	+	627	processed_pseudogene	predicted gene 5121 [Source:MGI Symbol;Acc:MGI:3647258]	-
ENSMUSG00000029098	0.713795	2.13106	1.78515	1.21814	1.28613	1.19827	Acox3	5	35583040	35615352	+	11521	protein_coding	acyl-Coenzyme A oxidase 3, pristanoyl [Source:MGI Symbol;Acc:MGI:1933156]	-
ENSMUSG00000073929	1.55706	0.0291851	0.829393	0.108494	0.0106329	0.240642	Trim30e-ps1	7	104532959	104535361	-	1890	transcribed_unprocessed_pseudogene	tripartite motif-containing 30E, pseudogene 1 [Source:MGI Symbol;Acc:MGI:4821258]	-
ENSMUSG00000032484	168.287	0.713425	0.0660793	0.118417	0.457728	0.0585003	Ngp	9	110419747	110423012	+	1222	protein_coding	neutrophilic granule protein [Source:MGI Symbol;Acc:MGI:105983]	-
ENSMUSG00000098713	4.70464	0	0.0158518	0.542769	0.0946821	0	Rps2-ps5	14	69158671	69159519	+	849	processed_pseudogene	ribosomal protein S2, pseudogene 5 [Source:MGI Symbol;Acc:MGI:3647821]	-
ENSMUSG00000067526	3.32852	0.113491	0.0185374	0.372043	0.119192	0.114553	Olfr1425	19	12073234	12077731	-	2178	protein_coding	olfactory receptor 1425 [Source:MGI Symbol;Acc:MGI:3031259]	-
ENSMUSG00000111422	0.888387	0.00435201	0.228819	0.759383	0.0337772	0.248193	1700027J07Rik	10	43745809	43765836	+	2782	lincRNA	RIKEN cDNA 1700027J07 gene [Source:MGI Symbol;Acc:MGI:1916693]	-
ENSMUSG00000022951	43.4302	10.5997	9.48397	7.95477	9.17114	9.46343	Rcan1	16	92391953	92470867	-	3085	protein_coding	regulator of calcineurin 1 [Source:MGI Symbol;Acc:MGI:1890564]	-
ENSMUSG00000038067	59.3971	0.0257055	0.0380981	0.0819279	0.0815135	0.0910667	Csf3	11	98701263	98703629	+	1413	protein_coding	colony stimulating factor 3 (granulocyte) [Source:MGI Symbol;Acc:MGI:1339751]	-
ENSMUSG00000043953	21.1254	3.46346	2.80624	3.69584	1.51646	2.61106	Ccrl2	9	111054486	111057519	-	2598	protein_coding	chemokine (C-C motif) receptor-like 2 [Source:MGI Symbol;Acc:MGI:1920904]	-
ENSMUSG00000021675	0	1.06867	0.556502	0.720592	1.69357	1.8745	F2rl2	13	95696853	95702739	+	2502	protein_coding	coagulation factor II (thrombin) receptor-like 2 [Source:MGI Symbol;Acc:MGI:1298208]	-
ENSMUSG00000115454	5.61129	0.0266681	0.0741088	0.226916	0.0149595	0.948808	Gm49086	14	52020076	52021908	+	908	antisense	predicted gene, 49086 [Source:MGI Symbol;Acc:MGI:6118474]	-
ENSMUSG00000038037	4.62948	0.730232	1.87173	1.04793	1.39255	0.246251	Socs1	16	10782240	10785536	-	2908	protein_coding	suppressor of cytokine signaling 1 [Source:MGI Symbol;Acc:MGI:1354910]	-
ENSMUSG00000052726	0.539261	0.00877977	0.0956417	0.160431	0.052867	0.108939	Kcnt2	1	140246158	140612067	+	6895	protein_coding	potassium channel, subfamily T, member 2 [Source:MGI Symbol;Acc:MGI:3036273]	-
ENSMUSG00000083226	8.77806	0.22134	2.41917	0.211634	0.430999	1.13076	Gm7831	16	90915180	90915726	+	547	processed_pseudogene	predicted gene 7831 [Source:MGI Symbol;Acc:MGI:3643841]	-
ENSMUSG00000078864	0.0250812	2.59886	2.00461	0.658806	0.94832	2.23207	Gm14322	2	177759288	177770472	+	1254	protein_coding	predicted gene 14322 [Source:MGI Symbol;Acc:MGI:3652185]	zf-C2H2
ENSMUSG00000027233	0.958994	0	0.0442339	0.118903	0	0	Patl2	2	122120108	122186189	-	2434	protein_coding	protein associated with topoisomerase II homolog 2 (yeast) [Source:MGI Symbol;Acc:MGI:1914828]	-
ENSMUSG00000060913	1.6062	0.00455333	0.0151841	0	0.592901	0.573841	Trim55	3	19644474	19692421	+	2659	protein_coding	tripartite motif-containing 55 [Source:MGI Symbol;Acc:MGI:3036269]	-
ENSMUSG00000058624	15.2805	2.95046	3.95868	1.82371	2.64248	2.84276	Gda	19	21391307	21473445	-	6135	protein_coding	guanine deaminase [Source:MGI Symbol;Acc:MGI:95678]	-
ENSMUSG00000117341	5.29335	0	0.628961	0	0	0	AC134446.1	17	9705342	9726361	-	792	lincRNA	novel transcript	-
ENSMUSG00000041594	0	0.315878	0.672482	0.449229	0.534287	0.589318	Tmtc4	14	122918971	122984035	-	8280	protein_coding	transmembrane and tetratricopeptide repeat containing 4 [Source:MGI Symbol;Acc:MGI:1921050]	-
ENSMUSG00000064246	495.712	144.263	235.953	111.839	64.2438	101.976	Chil1	1	134182176	134190181	+	2804	protein_coding	chitinase-like 1 [Source:MGI Symbol;Acc:MGI:1340899]	-
ENSMUSG00000113313	1.12321	0.0163202	0.136343	0.221473	0	0.142355	Gm32036	13	20445286	20473490	-	2638	antisense	predicted gene, 32036 [Source:MGI Symbol;Acc:MGI:5591195]	-
ENSMUSG00000105637	1.48262	0	0.0941301	0.587791	0.0157031	0.0595882	Gm42480	5	57793159	57795753	+	2595	TEC	predicted gene 42480 [Source:MGI Symbol;Acc:MGI:5662617]	-
ENSMUSG00000001672	0	0.858097	0.762316	1.1378	1.87	1.8697	Marveld3	8	109947914	109962203	-	3284	protein_coding	MARVEL (membrane-associating) domain containing 3 [Source:MGI Symbol;Acc:MGI:1920858]	-
ENSMUSG00000081476	6.21424	0.0742426	0.895525	0.309357	1.04543	0.119744	Itpa-ps1	2	94384502	94385098	-	597	processed_pseudogene	inosine triphosphatase (nucleoside triphosphate pyrophosphatase) pseudogene 1 [Source:MGI Symbol;Acc:MGI:3613363]	-
ENSMUSG00000027613	44.5396	11.5807	13.4131	12.2721	14.7017	12.8258	Eif6	2	155819832	155826925	-	2702	protein_coding	eukaryotic translation initiation factor 6 [Source:MGI Symbol;Acc:MGI:1196288]	-
ENSMUSG00000115044	1.24559	0.00970136	0.157579	0.362224	0.0161028	0.0973526	Gm48978	16	94218021	94223012	-	4992	TEC	predicted gene, 48978 [Source:MGI Symbol;Acc:MGI:6118322]	-
ENSMUSG00000085201	5.46877	0.0151152	0	0.217402	0	0	Nr6a1os	2	38823257	38852370	+	801	antisense	nuclear receptor subfamily 6, group A, member 1, opposite strand [Source:MGI Symbol;Acc:MGI:3649430]	-
ENSMUSG00000064941	29.9787	0.14765	4.4095	7.08211	0	0	Gm23238	19	18732741	18732904	+	164	snRNA	predicted gene, 23238 [Source:MGI Symbol;Acc:MGI:5453015]	-
ENSMUSG00000026473	209.934	62.7738	63.2193	69.1164	101.511	74.5464	Glul	1	153899944	153909723	+	3323	protein_coding	glutamate-ammonia ligase (glutamine synthetase) [Source:MGI Symbol;Acc:MGI:95739]	-
ENSMUSG00000033196	0.321892	0	0.0366454	0.301429	0	0.0180296	Myh2	11	67171027	67197517	+	7137	protein_coding	myosin, heavy polypeptide 2, skeletal muscle, adult [Source:MGI Symbol;Acc:MGI:1339710]	-
ENSMUSG00000004609	5.21189	0.764273	0.744096	0.641033	1.00235	0.663691	Cd33	7	43524216	43544428	-	7771	protein_coding	CD33 antigen [Source:MGI Symbol;Acc:MGI:99440]	-
ENSMUSG00000026981	32.0748	0.431791	0.952812	0.488681	0.508315	0.322375	Il1rn	2	24336853	24351494	+	5535	protein_coding	interleukin 1 receptor antagonist [Source:MGI Symbol;Acc:MGI:96547]	-
ENSMUSG00000038085	8.95039	1.46591	3.35797	1.02014	1.56599	2.61903	Cnbd2	2	156312299	156375638	+	3879	protein_coding	cyclic nucleotide binding domain containing 2 [Source:MGI Symbol;Acc:MGI:1918123]	-
ENSMUSG00000031089	35.2639	6.61974	4.76383	3.51059	8.0579	5.31347	Slc6a14	X	21714896	21742355	+	3434	protein_coding	solute carrier family 6 (neurotransmitter transporter), member 14 [Source:MGI Symbol;Acc:MGI:1890216]	-
ENSMUSG00000024803	23.5594	4.01033	3.91707	5.74085	9.81272	2.84577	Ankrd1	19	36111965	36119844	-	1765	protein_coding	ankyrin repeat domain 1 (cardiac muscle) [Source:MGI Symbol;Acc:MGI:1097717]	-
ENSMUSG00000097817	2.16123	0.0192791	0.503757	0.508892	0.0865172	0.304922	Gm26810	7	30193954	30200889	+	1256	antisense	predicted gene, 26810 [Source:MGI Symbol;Acc:MGI:5477304]	-
ENSMUSG00000110123	2.58936	0	0.997261	0.2879	0.0668305	0	Gm18562	13	13323364	13350427	+	915	unprocessed_pseudogene	predicted gene, 18562 [Source:MGI Symbol;Acc:MGI:5010747]	-
ENSMUSG00000031844	1.13118	0	0.2299	0.0601684	0.010445	0.114814	Hsd17b2	8	117701904	117759027	+	1924	protein_coding	hydroxysteroid (17-beta) dehydrogenase 2 [Source:MGI Symbol;Acc:MGI:1096386]	-
ENSMUSG00000102633	2.75839	0.0172961	0.316278	0.124033	0.0832907	0	Gm38224	1	21234722	21236821	+	2100	TEC	predicted gene, 38224 [Source:MGI Symbol;Acc:MGI:5611452]	-
ENSMUSG00000097453	0.0554706	3.10234	2.99181	3.75214	5.55877	6.52782	Gm26894	5	28466374	28480973	+	1134	lincRNA	predicted gene, 26894 [Source:MGI Symbol;Acc:MGI:5477388]	-
ENSMUSG00000019539	6.76572	23.1371	17.1652	15.3227	11.612	14.2592	Rcn3	7	45082913	45092221	-	1717	protein_coding	reticulocalbin 3, EF-hand calcium binding domain [Source:MGI Symbol;Acc:MGI:1277122]	-
ENSMUSG00000105659	3.11125	0	0.379933	0.403832	0	0	4930509H03Rik	3	104510099	104511313	-	1215	sense_intronic	RIKEN cDNA 4930509H03 gene [Source:MGI Symbol;Acc:MGI:1922357]	-
ENSMUSG00000052681	222.064	74.3897	63.5918	69.0857	59.8557	61.0994	Rap1b	10	117813871	117846035	-	2884	protein_coding	RAS related protein 1b [Source:MGI Symbol;Acc:MGI:894315]	-
ENSMUSG00000024014	36.1038	8.0643	9.52124	6.56188	5.23569	4.9548	Pim1	17	29490812	29496111	+	2638	protein_coding	proviral integration site 1 [Source:MGI Symbol;Acc:MGI:97584]	-
ENSMUSG00000097195	17.7509	3.76642	4.10417	5.15392	6.44122	3.89335	Snhg5	9	88521050	88522929	-	1730	processed_transcript	small nucleolar RNA host gene 5 [Source:MGI Symbol;Acc:MGI:1919905]	-
ENSMUSG00000117008	1.88563	0	0.0201068	0.261847	0	0	AC115970.1	10	96047628	96096005	-	2008	unitary_pseudogene	pleckstrin homology domain containing, family G (with RhoGef domain) member 7 pseudogene	-
ENSMUSG00000099974	46.9903	6.74381	7.94354	5.78667	6.00634	7.20844	Bcl2a1d	9	88723285	88731914	-	863	protein_coding	B cell leukemia/lymphoma 2 related protein A1d [Source:MGI Symbol;Acc:MGI:1278325]	-
ENSMUSG00000115531	5.67842	0	1.02128	1.24987	0.0296405	1.87461	Gm35419	14	62113120	62171126	-	678	lincRNA	predicted gene, 35419 [Source:MGI Symbol;Acc:MGI:5594578]	-
ENSMUSG00000021453	97.3439	17.3394	19.4455	19.162	10.9291	13.2903	Gadd45g	13	51846678	51848468	+	1173	protein_coding	growth arrest and DNA-damage-inducible 45 gamma [Source:MGI Symbol;Acc:MGI:1346325]	-
ENSMUSG00000029135	15.7294	3.9941	3.74362	5.49038	5.14663	5.12254	Fosl2	5	32135801	32157842	+	9680	protein_coding	fos-like antigen 2 [Source:MGI Symbol;Acc:MGI:102858]	TF_bZIP
ENSMUSG00000007659	51.4783	18.7623	15.8454	19.3973	15.3165	19.3549	Bcl2l1	2	152780668	152831728	-	4586	protein_coding	BCL2-like 1 [Source:MGI Symbol;Acc:MGI:88139]	-
ENSMUSG00000063626	0	0.305858	0.223499	0.240326	0.00948538	0.113	Unc5d	8	28646717	29219636	-	9220	protein_coding	unc-5 netrin receptor D [Source:MGI Symbol;Acc:MGI:2389364]	-
ENSMUSG00000020733	55.5634	15.1439	25.9064	21.7046	47.6337	60.13	Slc9a3r1	11	115163341	115181181	+	1925	protein_coding	solute carrier family 9 (sodium/hydrogen exchanger), member 3 regulator 1 [Source:MGI Symbol;Acc:MGI:1349482]	-
ENSMUSG00000028577	11.6121	3.34083	4.70313	3.93833	4.58424	4.62845	Plaa	4	94567514	94603244	-	6441	protein_coding	phospholipase A2, activating protein [Source:MGI Symbol;Acc:MGI:104810]	-
ENSMUSG00000031461	0.24735	0	0.258887	0.0588431	0	0.0474092	Myom2	8	15057653	15133541	+	8853	protein_coding	myomesin 2 [Source:MGI Symbol;Acc:MGI:1328358]	-
ENSMUSG00000022836	4.96394	14.1905	12.8047	10.6208	9.50167	8.11525	Mylk	16	34745210	35002420	+	11263	protein_coding	myosin, light polypeptide kinase [Source:MGI Symbol;Acc:MGI:894806]	-
ENSMUSG00000089844	4.01078	0.0604232	0.226681	0.346108	0.353378	0.0802728	A530032D15Rik	1	85083069	85109853	-	1603	protein_coding	RIKEN cDNA A530032D15Rik gene [Source:MGI Symbol;Acc:MGI:3037746]	-
ENSMUSG00000096822	0.414841	0.0047325	0.194712	0.156586	0.00523681	0	Olfr344	2	36566662	36576178	+	7675	protein_coding	olfactory receptor 344 [Source:MGI Symbol;Acc:MGI:3030178]	-
ENSMUSG00000027356	0	0.450355	0.982677	1.11026	2.22044	2.79968	Fermt1	2	132904389	132945906	-	5699	protein_coding	fermitin family member 1 [Source:MGI Symbol;Acc:MGI:2443583]	-
ENSMUSG00000084522	29.7347	0	0.640864	1.72268	0	0	Gm25819	11	68996002	68996085	+	84	snRNA	predicted gene, 25819 [Source:MGI Symbol;Acc:MGI:5455596]	-
ENSMUSG00000024402	0	2.12354	3.96943	1.3237	0.448877	0	Lta	17	35203165	35205351	-	1383	protein_coding	lymphotoxin A [Source:MGI Symbol;Acc:MGI:104797]	-
ENSMUSG00000026640	2.92935	0.696439	0.676047	0.635414	0.68831	0.448586	Plxna2	1	194618218	194816869	+	17174	protein_coding	plexin A2 [Source:MGI Symbol;Acc:MGI:107684]	-
ENSMUSG00000055095	4.32988	0	0.285062	0.547377	0.102707	0	Spink6	18	44071393	44083610	+	587	protein_coding	serine peptidase inhibitor, Kazal type 6 [Source:MGI Symbol;Acc:MGI:3648654]	-
ENSMUSG00000000204	5.05397	0.174096	0.0475313	0.309875	0.215316	0.0901708	Slfn4	11	83175186	83190216	+	3964	protein_coding	schlafen 4 [Source:MGI Symbol;Acc:MGI:1329010]	-
ENSMUSG00000079644	0.565308	0	0.903224	0.38548	0.0250019	0.0348517	Gm1110	9	26879567	26923111	-	3803	protein_coding	predicted gene 1110 [Source:MGI Symbol;Acc:MGI:2685956]	-
ENSMUSG00000042265	11.1978	0.0727408	0.792326	0.320336	0.20073	0	Trem1	17	48232768	48246924	+	2996	protein_coding	triggering receptor expressed on myeloid cells 1 [Source:MGI Symbol;Acc:MGI:1930005]	-
ENSMUSG00000097076	2.72108	0	1.05631	1.47375	0.0301293	0	Platr7	10	84547417	84553338	-	1334	lincRNA	pluripotency associated transcript 7 [Source:MGI Symbol;Acc:MGI:3045387]	-
ENSMUSG00000047945	64.4412	13.2731	21.4829	8.78479	8.53698	11.9331	Marcksl1	4	129513581	129515985	+	1605	protein_coding	MARCKS-like 1 [Source:MGI Symbol;Acc:MGI:97143]	-
ENSMUSG00000101258	4.76237	0	1.77167	0.115996	0.771886	0	Gm29477	11	95375525	95384507	-	499	antisense	predicted gene 29477 [Source:MGI Symbol;Acc:MGI:5580183]	-
ENSMUSG00000033107	8.81281	1.24054	0.416661	1.68564	0.867928	0.749401	Rnf125	18	20944625	20983848	+	1334	protein_coding	ring finger protein 125 [Source:MGI Symbol;Acc:MGI:1914914]	-
ENSMUSG00000066366	1.96014	0	0.0661154	0.226825	0	0	Serpina1a	12	103853589	103863562	-	1832	protein_coding	serine (or cysteine) peptidase inhibitor, clade A, member 1A [Source:MGI Symbol;Acc:MGI:891971]	-
ENSMUSG00000052212	6.26731	0.563403	4.09097	1.76993	5.50178	5.12864	Cd177	7	24743983	24760311	-	2840	protein_coding	CD177 antigen [Source:MGI Symbol;Acc:MGI:1916141]	-
ENSMUSG00000001627	33.5506	11.4122	9.86321	14.6789	10.718	11.3312	Ifrd1	12	40201567	40248504	-	5858	protein_coding	interferon-related developmental regulator 1 [Source:MGI Symbol;Acc:MGI:1316717]	-
ENSMUSG00000078920	24.6499	6.87811	9.84361	12.8165	9.38456	12.4216	Ifi47	11	49076587	49096974	+	2473	protein_coding	interferon gamma inducible protein 47 [Source:MGI Symbol;Acc:MGI:99448]	-
ENSMUSG00000097625	2.53702	0	0	0	0.0576781	0.428578	Gm26561	17	70878078	71393284	+	1413	lincRNA	predicted gene, 26561 [Source:MGI Symbol;Acc:MGI:5477055]	-
ENSMUSG00000037095	144.891	27.1284	40.1941	12.9562	11.6404	15.2919	Lrg1	17	56119678	56122001	-	1408	protein_coding	leucine-rich alpha-2-glycoprotein 1 [Source:MGI Symbol;Acc:MGI:1924155]	-
ENSMUSG00000032369	67.0697	17.1431	12.4841	24.3087	17.2899	20.9959	Plscr1	9	92249750	92272278	+	2462	protein_coding	phospholipid scramblase 1 [Source:MGI Symbol;Acc:MGI:893575]	-
ENSMUSG00000018920	42.7292	12.4645	11.2977	8.67685	9.28565	9.98177	Cxcl16	11	70453983	70459984	-	3021	protein_coding	chemokine (C-X-C motif) ligand 16 [Source:MGI Symbol;Acc:MGI:1932682]	-
ENSMUSG00000065096	65.4475	2.10013	5.61594	9.94163	0	0	Gm23680	10	12363410	12363573	+	164	snRNA	predicted gene, 23680 [Source:MGI Symbol;Acc:MGI:5453457]	-
ENSMUSG00000047992	3.12711	0.191039	0.97577	1.23131	0.307795	0.420913	Fam69c	18	84720019	84740436	+	2662	protein_coding	family with sequence similarity 69, member C [Source:MGI Symbol;Acc:MGI:3041188]	-
ENSMUSG00000024598	0.676476	0.0196397	0.299702	0.177633	0.0211997	0.0316176	Fbn2	18	58008623	58209926	-	10480	protein_coding	fibrillin 2 [Source:MGI Symbol;Acc:MGI:95490]	-
ENSMUSG00000061540	4.90398	0.0156223	0.121557	0.224059	0	0.0737934	Orm2	4	63362449	63365878	+	775	protein_coding	orosomucoid 2 [Source:MGI Symbol;Acc:MGI:97444]	-
ENSMUSG00000001305	9.08171	2.17249	4.38848	3.29945	2.1993	3.52287	Rrp15	1	186720978	186749358	-	3239	protein_coding	ribosomal RNA processing 15 homolog (S. cerevisiae) [Source:MGI Symbol;Acc:MGI:1914473]	-
ENSMUSG00000108812	3.30889	0.0165853	0.8035	0.37663	0.091891	0.242084	C130083A15Rik	7	73527266	73528725	-	1460	TEC	RIKEN cDNA C130083A15 gene [Source:MGI Symbol;Acc:MGI:3028079]	-
ENSMUSG00000076617	7.63917	21.3143	83.804	12.2198	264.432	83.133	Ighm	12	113418558	113422730	-	1886	IG_C_gene	immunoglobulin heavy constant mu [Source:MGI Symbol;Acc:MGI:96448]	-
ENSMUSG00000077348	28.0845	0	0	11.2968	0	0	Gm24665	2	130086041	130086169	+	129	snoRNA	predicted gene, 24665 [Source:MGI Symbol;Acc:MGI:5454442]	-
ENSMUSG00000056952	16.4652	4.15192	5.41748	5.16475	5.38165	2.11365	Tatdn2	6	113697050	113711069	+	3548	protein_coding	TatD DNase domain containing 2 [Source:MGI Symbol;Acc:MGI:3576210]	-
ENSMUSG00000055862	0.123605	2.97684	4.1415	2.55504	5.09239	3.5233	Izumo4	10	80702184	80705373	+	2799	protein_coding	IZUMO family member 4 [Source:MGI Symbol;Acc:MGI:1918814]	-
ENSMUSG00000030474	6.81939	0.766942	0.822957	0.474902	0.755666	1.03576	Siglece	7	43651070	43660161	-	1849	protein_coding	sialic acid binding Ig-like lectin E [Source:MGI Symbol;Acc:MGI:1932475]	-
ENSMUSG00000097327	0	0.86357	2.08645	0.741408	0.6702	0.280057	E030030I06Rik	10	22113050	22149270	-	2789	protein_coding	RIKEN cDNA E030030I06 gene [Source:MGI Symbol;Acc:MGI:2442914]	-
ENSMUSG00000025287	32.7053	9.99538	13.4472	10.858	7.0971	6.92447	Acot9	X	155262443	155297654	+	2273	protein_coding	acyl-CoA thioesterase 9 [Source:MGI Symbol;Acc:MGI:1928939]	-
ENSMUSG00000115052	3.80953	0.0397395	0.252527	1.31341	0	0.821736	Gm9287	14	96967825	96969754	+	914	processed_pseudogene	predicted gene 9287 [Source:MGI Symbol;Acc:MGI:3648945]	-
ENSMUSG00000024379	15.4913	1.36707	1.78719	1.50157	1.43419	1.89509	Tslp	18	32815383	32819799	+	1133	protein_coding	thymic stromal lymphopoietin [Source:MGI Symbol;Acc:MGI:1855696]	-
ENSMUSG00000087485	3.00699	0	0.425395	0.0754078	0.210352	0.134306	Gm13383	2	6255946	6257266	-	1171	lincRNA	predicted gene 13383 [Source:MGI Symbol;Acc:MGI:3650825]	-
ENSMUSG00000004451	30.8743	11.2797	9.45882	10.8392	8.92408	8.38509	Ralb	1	119470305	119504794	-	4930	protein_coding	v-ral simian leukemia viral oncogene B [Source:MGI Symbol;Acc:MGI:1927244]	-
ENSMUSG00000102389	1.42525	0.00781368	0.261254	0.261054	0.0194543	0.122447	D630023O14Rik	1	164575455	164578553	+	3099	TEC	RIKEN cDNA D630023O14 gene [Source:MGI Symbol;Acc:MGI:2444249]	-
ENSMUSG00000056501	135.741	48.122	62.2712	72.2884	49.5722	65.513	Cebpb	2	167688915	167690418	+	1504	protein_coding	CCAAT/enhancer binding protein (C/EBP), beta [Source:MGI Symbol;Acc:MGI:88373]	C/EBP
ENSMUSG00000040479	2.02746	7.49208	10.2135	5.12882	5.13638	4.8527	Dgkz	2	91932824	91975864	-	6270	protein_coding	diacylglycerol kinase zeta [Source:MGI Symbol;Acc:MGI:1278339]	-
ENSMUSG00000044433	0	0.379414	0.61017	0.702816	1.05117	0.769389	Camsap3	8	3587293	3609075	+	6119	protein_coding	calmodulin regulated spectrin-associated protein family, member 3 [Source:MGI Symbol;Acc:MGI:1916947]	-
ENSMUSG00000028255	10.0331	0.00320553	2.02052	0.202488	0.0215778	0	Clca1	3	145003817	145032776	-	3777	protein_coding	chloride channel accessory 1 [Source:MGI Symbol;Acc:MGI:1346342]	-
ENSMUSG00000012443	0.0195799	0.835988	1.4682	0.332969	0.510835	0.621611	Kif11	19	37376403	37421859	+	4819	protein_coding	kinesin family member 11 [Source:MGI Symbol;Acc:MGI:1098231]	-
ENSMUSG00000106943	0	1.73394	1.07808	1.50439	1.44788	2.15948	Dancr	5	74093060	74095406	+	2347	processed_transcript	differentiation antagonizing non-protein coding RNA [Source:MGI Symbol;Acc:MGI:1917286]	-
ENSMUSG00000040026	602.32	0.807498	19.0496	1.13302	1.98038	6.82043	Saa3	7	46711998	46715700	-	2606	protein_coding	serum amyloid A 3 [Source:MGI Symbol;Acc:MGI:98223]	-
ENSMUSG00000022372	3.59192	0.68115	0.910615	0.636013	1.08851	0.611917	Sla	15	66780819	66831829	-	9186	protein_coding	src-like adaptor [Source:MGI Symbol;Acc:MGI:104295]	-
ENSMUSG00000086507	2.58417	0.0123042	0.027354	0.0299128	0.0828244	0	Adap2os	11	80158861	80177629	-	984	antisense	ArfGAP with dual PH domains 2, opposite strand [Source:MGI Symbol;Acc:MGI:3650197]	-
ENSMUSG00000020848	1.00793	0.00555254	0.202025	0.265566	0.624743	0.206545	Doc2b	11	75768966	75796049	-	4361	protein_coding	double C2, beta [Source:MGI Symbol;Acc:MGI:1100497]	-
ENSMUSG00000000794	0	0.221796	0.545613	0.243177	0.0954096	0.0994	Kcnn3	3	89520164	89675132	+	10451	protein_coding	potassium intermediate/small conductance calcium-activated channel, subfamily N, member 3 [Source:MGI Symbol;Acc:MGI:2153183]	-
ENSMUSG00000070729	46.6272	9.31991	4.96928	8.94868	11.5342	15.122	Gm12966	4	129899093	129899902	+	810	processed_pseudogene	predicted gene 12966 [Source:MGI Symbol;Acc:MGI:3652043]	-
ENSMUSG00000022218	4.35636	0.301647	4.81509	1.6957	1.44865	0.628856	Tgm1	14	55700009	55713926	-	3162	protein_coding	transglutaminase 1, K polypeptide [Source:MGI Symbol;Acc:MGI:98730]	-
ENSMUSG00000082292	5.55081	0.581565	2.12844	2.57301	2.76403	0.97538	Gm12250	11	58187739	58189012	+	1274	processed_pseudogene	predicted gene 12250 [Source:MGI Symbol;Acc:MGI:3649299]	-
ENSMUSG00000028480	43.4796	11.2616	16.0796	11.8047	6.19208	6.90928	Glipr2	4	43957401	43979118	+	2320	protein_coding	GLI pathogenesis-related 2 [Source:MGI Symbol;Acc:MGI:1917770]	-
ENSMUSG00000110864	1.75244	0	0.914852	0.457299	0.0224516	0	Gm31374	9	46337931	46384755	+	1210	lincRNA	predicted gene, 31374 [Source:MGI Symbol;Acc:MGI:5590533]	-
ENSMUSG00000070605	0.992037	0.0336898	0.607624	0.275697	0.116183	0.0888337	Zfp992	4	146449023	146470292	+	4550	protein_coding	zinc finger protein 992 [Source:MGI Symbol;Acc:MGI:3700963]	zf-C2H2
ENSMUSG00000020990	0.01541	1.3626	2.49883	1.0501	2.45309	3.47966	Cdkl1	12	69746848	69791267	-	2041	protein_coding	cyclin-dependent kinase-like 1 (CDC2-related kinase) [Source:MGI Symbol;Acc:MGI:1918341]	-
ENSMUSG00000024661	10579.9	2846.55	3034.07	2785.39	2901.34	2664.45	Fth1	19	9982703	9985092	+	866	protein_coding	ferritin heavy polypeptide 1 [Source:MGI Symbol;Acc:MGI:95588]	-
ENSMUSG00000108676	1.88171	0	0.681225	0.677746	0	0.256162	1700123J17Rik	7	126224247	126248238	-	1805	lincRNA	RIKEN cDNA 1700123J17 gene [Source:MGI Symbol;Acc:MGI:1923978]	-
ENSMUSG00000029838	0.0723012	1.39297	1.1728	0.685045	0.317929	0.318018	Ptn	6	36714929	36810220	-	3433	protein_coding	pleiotrophin [Source:MGI Symbol;Acc:MGI:97804]	-
ENSMUSG00000029797	0	0.145965	0.702059	0.0882258	0.164565	0.22211	Sspo	6	48448229	48501250	+	15863	protein_coding	SCO-spondin [Source:MGI Symbol;Acc:MGI:2674311]	-
ENSMUSG00000082154	3.09929	0	0.839724	0.95644	0.0183528	0	Gm16464	7	104501055	104502149	-	1095	processed_pseudogene	predicted gene 16464 [Source:MGI Symbol;Acc:MGI:3643716]	-
ENSMUSG00000031298	0	0.448989	0.925604	0.453161	0.355425	0.302325	Adgrg2	X	160390690	160498070	+	5278	protein_coding	adhesion G protein-coupled receptor G2 [Source:MGI Symbol;Acc:MGI:2446854]	-
ENSMUSG00000021986	0.193348	0	0.193373	0.0678729	0.0172899	0	Amer2	14	60373259	60388197	+	10660	protein_coding	APC membrane recruitment 2 [Source:MGI Symbol;Acc:MGI:1919375]	-
ENSMUSG00000002289	13.1048	2.63924	3.88367	5.04174	1.43052	1.35618	Angptl4	17	33773750	33781575	-	3286	protein_coding	angiopoietin-like 4 [Source:MGI Symbol;Acc:MGI:1888999]	-
ENSMUSG00000109008	0	3.1424	0.731558	1.85335	2.07093	2.02229	Gm44899	7	80980846	80993415	-	807	lincRNA	predicted gene 44899 [Source:MGI Symbol;Acc:MGI:5753475]	-
ENSMUSG00000115630	5.75604	0	3.63428	0.0783897	0	0	Rpl19-ps5	14	120713078	120713666	+	589	processed_pseudogene	ribosomal protein L19, pseudogene 5 [Source:MGI Symbol;Acc:MGI:3644768]	-
ENSMUSG00000075297	4.73983	0.0499064	1.90962	0.335246	0	0	H60b	10	22158586	22288849	+	1213	protein_coding	histocompatibility 60b [Source:MGI Symbol;Acc:MGI:3649078]	-
ENSMUSG00000037263	0.603343	0.00579435	1.44568	0.667193	0.0455776	0	Aldh3b3	19	3958645	3972103	+	4179	protein_coding	aldehyde dehydrogenase 3 family, member B3 [Source:MGI Symbol;Acc:MGI:1920708]	-
ENSMUSG00000028766	6.5729	1.35124	3.52113	1.38105	2.56625	3.17752	Alpl	4	137741733	137796384	-	4033	protein_coding	alkaline phosphatase, liver/bone/kidney [Source:MGI Symbol;Acc:MGI:87983]	-
ENSMUSG00000113669	1.40939	0.104417	0.150348	0.231315	0.129291	0.263036	Gm36723	12	25303940	25471979	+	6803	lincRNA	predicted gene, 36723 [Source:MGI Symbol;Acc:MGI:5595882]	-
ENSMUSG00000085148	35.8615	7.19624	7.37862	12.7612	23.4477	19.6908	Mir22hg	11	75461539	75466676	+	1924	processed_transcript	Mir22 host gene (non-protein coding) [Source:MGI Symbol;Acc:MGI:1914348]	-
ENSMUSG00000025219	2.53624	0	2.04882	0.128992	0	0	Fgf8	19	45736798	45742915	-	1350	protein_coding	fibroblast growth factor 8 [Source:MGI Symbol;Acc:MGI:99604]	-
ENSMUSG00000052563	0	1.12081	0.739042	0.847747	1.06523	1.41594	D930048N14Rik	11	51650954	51657681	+	3429	protein_coding	RIKEN cDNA D930048N14 gene [Source:MGI Symbol;Acc:MGI:2144709]	-
ENSMUSG00000112167	13.9189	0	4.66872	0.588172	0.173034	1.26632	Gm47053	12	76492355	76492511	+	157	processed_pseudogene	predicted gene, 47053 [Source:MGI Symbol;Acc:MGI:6095761]	-
ENSMUSG00000026170	0.231583	4.63788	3.28912	3.282	2.93556	1.97275	Cyp27a1	1	74713574	74737892	+	2173	protein_coding	cytochrome P450, family 27, subfamily a, polypeptide 1 [Source:MGI Symbol;Acc:MGI:88594]	-
ENSMUSG00000060183	1.08751	0.00319117	0.182156	0.00775809	0.118947	0	Cxcl11	5	92359544	92365485	-	3794	polymorphic_pseudogene	chemokine (C-X-C motif) ligand 11 [Source:MGI Symbol;Acc:MGI:1860203]	-
ENSMUSG00000067818	38.1068	126.581	165.795	115.585	138.376	112.115	Myl9	2	156775420	156781658	+	1162	protein_coding	myosin, light polypeptide 9, regulatory [Source:MGI Symbol;Acc:MGI:2138915]	-
ENSMUSG00000022550	0.0779154	2.08484	4.07629	2.81063	4.82016	5.0526	Adck5	15	76576358	76595816	+	3633	protein_coding	aarF domain containing kinase 5 [Source:MGI Symbol;Acc:MGI:2679274]	-
ENSMUSG00000004939	1.86491	0	0.14518	0.632027	0.395601	0.24329	Nmrk2	10	81198170	81202051	-	1854	protein_coding	nicotinamide riboside kinase 2 [Source:MGI Symbol;Acc:MGI:1916814]	-
ENSMUSG00000074589	0.864231	0.00813116	0.0516699	0.19569	0.0315542	0	4930449A18Rik	3	59777809	59846817	+	2978	transcribed_unprocessed_pseudogene	RIKEN cDNA 4930449A18 gene [Source:MGI Symbol;Acc:MGI:1921922]	-
ENSMUSG00000034121	0.0311096	1.17757	1.67407	0.901856	3.121	4.10902	Mks1	11	87853215	87863803	+	4044	protein_coding	Meckel syndrome, type 1 [Source:MGI Symbol;Acc:MGI:3584243]	-
ENSMUSG00000002833	1.3835	5.58135	5.76091	4.32114	7.37637	5.82911	Hdgfl2	17	56079634	56100607	+	4876	protein_coding	HDGF like 2 [Source:MGI Symbol;Acc:MGI:1194492]	-
ENSMUSG00000093402	9.17406	0.368694	2.82367	0.606468	1.83935	0.958977	Gm18588	3	68902267	68902758	-	492	processed_pseudogene	predicted gene, 18588 [Source:MGI Symbol;Acc:MGI:5010773]	-
ENSMUSG00000074782	0	0.388426	0.0159268	0.0244641	0.294377	0.0986459	4833422C13Rik	13	91701665	91741872	-	5915	antisense	RIKEN cDNA 4833422C13 gene [Source:MGI Symbol;Acc:MGI:3603826]	-
ENSMUSG00000042354	5.97039	1.64273	2.3818	2.3535	2.45621	2.07424	Gnl3	14	31012433	31019152	-	6101	protein_coding	guanine nucleotide binding protein-like 3 (nucleolar) [Source:MGI Symbol;Acc:MGI:1353651]	-
ENSMUSG00000029754	4.27666	0.358271	1.34735	1.10535	0.119869	0.0930113	Dlx6	6	6863334	6868568	+	2375	protein_coding	distal-less homeobox 6 [Source:MGI Symbol;Acc:MGI:101927]	Homeobox
ENSMUSG00000105065	0.988138	0	0.285911	0.330925	0.0287144	0.14844	Gm42513	3	58079716	58081834	+	2119	TEC	predicted gene 42513 [Source:MGI Symbol;Acc:MGI:5662650]	-
ENSMUSG00000032657	0.276203	2.81216	4.23017	2.01807	2.2514	1.75397	Fam189b	3	89183143	89189295	+	3649	protein_coding	family with sequence similarity 189, member B [Source:MGI Symbol;Acc:MGI:1915771]	-
ENSMUSG00000064512	17.2694	0	0	0	0	0	Gm22456	11	94919709	94919833	+	125	snRNA	predicted gene, 22456 [Source:MGI Symbol;Acc:MGI:5452233]	-
ENSMUSG00000038599	0.0136034	0.926037	1.74191	0.727463	0.0625348	0	Capn8	1	182565007	182632352	+	3770	protein_coding	calpain 8 [Source:MGI Symbol;Acc:MGI:2181366]	-
ENSMUSG00000115334	1.69429	0	0.116687	0.122028	0	0	Gm17923	14	80214930	80216352	+	1423	processed_pseudogene	predicted gene, 17923 [Source:MGI Symbol;Acc:MGI:5010108]	-
ENSMUSG00000020263	1.5002	6.4499	11.5557	8.84804	26.9132	21.9354	Appl2	10	83600033	83648738	-	5949	protein_coding	adaptor protein, phosphotyrosine interaction, PH domain and leucine zipper containing 2 [Source:MGI Symbol;Acc:MGI:2384914]	-
ENSMUSG00000010067	5.93453	1.07537	1.02288	0.635252	1.14385	0.501049	Rassf1	9	107551555	107562267	+	5845	protein_coding	Ras association (RalGDS/AF-6) domain family member 1 [Source:MGI Symbol;Acc:MGI:1928386]	-
ENSMUSG00000097090	2.00535	0	0.0932564	0.142711	0.0164645	0	Gm26724	17	27201032	27203071	+	1650	lincRNA	predicted gene, 26724 [Source:MGI Symbol;Acc:MGI:5477218]	-
ENSMUSG00000114430	0.840135	0	0.013921	0.0449046	0	0.0628374	Gm40264	5	9034780	9061316	+	3867	lincRNA	predicted gene, 40264 [Source:MGI Symbol;Acc:MGI:5623149]	-
ENSMUSG00000062515	7.90949	2.13958	37.3927	3.17956	0.706456	1.23572	Fabp4	3	10204088	10208576	-	4489	protein_coding	fatty acid binding protein 4, adipocyte [Source:MGI Symbol;Acc:MGI:88038]	-
ENSMUSG00000050966	0.822758	0	0.55516	0.37698	0	0	Lin28a	4	134003330	134018841	-	3996	protein_coding	lin-28 homolog A (C. elegans) [Source:MGI Symbol;Acc:MGI:1890546]	CSD
ENSMUSG00000016559	480.272	149.502	133.533	149.85	185.948	190.489	H3f3b	11	116021912	116027962	-	2976	protein_coding	H3 histone, family 3B [Source:MGI Symbol;Acc:MGI:1101768]	-
ENSMUSG00000104830	3.20727	0.166746	0.438139	0.272938	0.0821716	0.171093	5830487J09Rik	5	123366472	123368919	+	2243	processed_transcript	RIKEN cDNA 5830487J09 gene [Source:MGI Symbol;Acc:MGI:1923368]	-
ENSMUSG00000097343	0	0.939943	1.83653	0.646845	1.50583	1.70041	9030407P20Rik	7	120673436	120677570	-	2398	processed_transcript	RIKEN cDNA 9030407P20 gene [Source:MGI Symbol;Acc:MGI:1918818]	-
ENSMUSG00000021243	35.7065	11.0398	18.404	12.0456	16.0353	14.3844	Fcf1	12	84970897	84983303	+	1117	protein_coding	FCF1 rRNA processing protein [Source:MGI Symbol;Acc:MGI:1920986]	-
ENSMUSG00000042406	174.383	66.7458	68.1533	85.7839	58.7653	59.4479	Atf4	15	80255184	80257541	+	2358	protein_coding	activating transcription factor 4 [Source:MGI Symbol;Acc:MGI:88096]	TF_bZIP
ENSMUSG00000111761	0	0.950609	0.74687	0.403167	0.605545	0.356269	9230112J17Rik	9	60523967	60545882	-	2448	lincRNA	RIKEN cDNA 9230112J17 gene [Source:MGI Symbol;Acc:MGI:1924999]	-
ENSMUSG00000078763	12.0223	1.06816	4.75769	0.0155263	1.70319	0.446191	Slfn1	11	83116849	83122670	+	1864	protein_coding	schlafen 1 [Source:MGI Symbol;Acc:MGI:1313259]	-
ENSMUSG00000001918	8.03765	21.2801	35.3634	23.5733	43.2067	45.1303	Slc1a5	7	16781340	16798274	+	4173	protein_coding	solute carrier family 1 (neutral amino acid transporter), member 5 [Source:MGI Symbol;Acc:MGI:105305]	-
ENSMUSG00000029313	9.76343	2.96288	3.0721	3.18991	3.8509	2.92437	Aff1	5	103692374	103855322	+	9458	protein_coding	AF4/FMR2 family, member 1 [Source:MGI Symbol;Acc:MGI:1100819]	AF-4
ENSMUSG00000017144	13.7771	2.96401	2.74061	3.35917	2.22947	2.07016	Rnd3	2	51130438	51149111	-	4432	protein_coding	Rho family GTPase 3 [Source:MGI Symbol;Acc:MGI:1921444]	-
ENSMUSG00000112225	2.49396	0	1.99558	0.837006	0	0.223384	Gm48854	10	14327411	14336615	+	890	lincRNA	predicted gene, 48854 [Source:MGI Symbol;Acc:MGI:6098592]	-
ENSMUSG00000032021	1.24118	0.0376716	0.503339	0.153349	0.0393835	0	Crtam	9	40969691	41004628	-	5131	protein_coding	cytotoxic and regulatory T cell molecule [Source:MGI Symbol;Acc:MGI:1859822]	-
ENSMUSG00000021775	11.9963	5.34072	7.96173	6.11392	25.1436	16.1722	Nr1d2	14	18204054	18239127	-	5409	protein_coding	nuclear receptor subfamily 1, group D, member 2 [Source:MGI Symbol;Acc:MGI:2449205]	THR-like
ENSMUSG00000021024	134.006	44.1142	50.6065	49.3309	50.2306	51.1688	Psma6	12	55384222	55418454	+	1234	protein_coding	proteasome (prosome, macropain) subunit, alpha type 6 [Source:MGI Symbol;Acc:MGI:1347006]	-
ENSMUSG00000005800	4.96285	0.337268	0.260915	0.202885	0.164581	0.258302	Mmp8	9	7558456	7568485	+	2425	protein_coding	matrix metallopeptidase 8 [Source:MGI Symbol;Acc:MGI:1202395]	-
ENSMUSG00000036760	0.392536	0.002953	0.040357	0.144331	0.0136455	0.0341231	Kcnk9	15	72501089	72546340	-	12300	protein_coding	potassium channel, subfamily K, member 9 [Source:MGI Symbol;Acc:MGI:3521816]	-
ENSMUSG00000001865	0.269528	5.42684	3.98594	5.35155	2.22189	3.7329	Cpa3	3	20215620	20242181	-	1517	protein_coding	carboxypeptidase A3, mast cell [Source:MGI Symbol;Acc:MGI:88479]	-
ENSMUSG00000070713	42.0706	11.4113	10.4802	14.2992	10.5843	8.93903	Gm10282	8	72304110	72305260	-	1151	protein_coding	predicted pseudogene 10282 [Source:MGI Symbol;Acc:MGI:3704312]	-
ENSMUSG00000061613	110.096	38.4115	31.9174	37.5815	51.4081	43.4077	U2af1	17	31647082	31658754	-	974	protein_coding	U2 small nuclear ribonucleoprotein auxiliary factor (U2AF) 1 [Source:MGI Symbol;Acc:MGI:98884]	-
ENSMUSG00000026701	405.604	136.27	136.439	180.55	230.489	195.45	Prdx6	1	161240112	161251219	-	4804	protein_coding	peroxiredoxin 6 [Source:MGI Symbol;Acc:MGI:894320]	-
ENSMUSG00000017057	13.6506	3.77444	10.4	9.27129	9.39381	10.8276	Il13ra1	X	36112110	36171259	+	3712	protein_coding	interleukin 13 receptor, alpha 1 [Source:MGI Symbol;Acc:MGI:105052]	-
ENSMUSG00000037143	0.00889643	0.33451	0.625153	0.563816	1.39026	1.27093	Cfap61	2	145934784	146215039	+	10606	protein_coding	cilia and flagella associated protein 61 [Source:MGI Symbol;Acc:MGI:1926024]	-
ENSMUSG00000109413	1.35816	0	0.00825147	0.736027	0.058297	0.270879	Gm45165	8	23696005	23697635	+	1631	TEC	predicted gene 45165 [Source:MGI Symbol;Acc:MGI:5753741]	-
ENSMUSG00000048965	0	0.588464	0.447392	0.115557	0.222465	0.43606	Mrgpre	7	143778363	143784500	-	3761	protein_coding	MAS-related GPR, member E [Source:MGI Symbol;Acc:MGI:2441884]	-
ENSMUSG00000105390	3.88677	0	0.0985945	1.15067	0.0165851	0.404582	Gm8458	5	146070906	146071724	+	819	processed_pseudogene	predicted gene 8458 [Source:MGI Symbol;Acc:MGI:3647455]	-
ENSMUSG00000092616	3.37679	0	0	1.05304	0	0	Vmn1r-ps74	7	21092110	21092679	+	570	unprocessed_pseudogene	vomeronasal 1 receptor, pseudogene 74 [Source:MGI Symbol;Acc:MGI:3780015]	-
ENSMUSG00000028191	20.0539	6.24227	7.84934	6.43106	5.57239	4.56453	Bcl10	3	145922804	145934356	+	4564	protein_coding	B cell leukemia/lymphoma 10 [Source:MGI Symbol;Acc:MGI:1337994]	-
ENSMUSG00000104728	3.66349	0.0355313	0	0.0424666	0.160343	0	Gm42462	5	43752909	43754271	-	1363	TEC	predicted gene 42462 [Source:MGI Symbol;Acc:MGI:5662599]	-
ENSMUSG00000066363	42.6498	0.707167	1.06226	0.925196	2.95802	1.62884	Serpina3f	12	104214544	104221129	+	2290	protein_coding	serine (or cysteine) peptidase inhibitor, clade A, member 3F [Source:MGI Symbol;Acc:MGI:2182838]	-
ENSMUSG00000115065	11.4322	0	0.868638	0	0	0	Gm49109	14	44306134	44306443	-	310	processed_pseudogene	predicted gene, 49109 [Source:MGI Symbol;Acc:MGI:6118509]	-
ENSMUSG00000028121	7.63834	1.53866	2.56364	1.88236	2.31561	2.69955	Bcar3	3	122294136	122530191	+	5604	protein_coding	breast cancer anti-estrogen resistance 3 [Source:MGI Symbol;Acc:MGI:1352501]	-
ENSMUSG00000049038	0.161568	3.83853	1.32809	1.37058	1.4277	0.881333	Mterf2	10	85119433	85128027	-	1752	protein_coding	mitochondrial transcription termination factor 2 [Source:MGI Symbol;Acc:MGI:1921488]	-
ENSMUSG00000108513	0.826441	0.00805811	0.125439	0.242907	0.0493514	0.0661603	Gm30075	7	73202775	73238531	-	3005	lincRNA	predicted gene, 30075 [Source:MGI Symbol;Acc:MGI:5589234]	-
ENSMUSG00000040488	3.42376	13.9	7.11574	9.25435	10.2661	14.6715	Ltbp4	7	27305136	27337692	-	6463	protein_coding	latent transforming growth factor beta binding protein 4 [Source:MGI Symbol;Acc:MGI:1321395]	-
ENSMUSG00000008393	115.593	43.6343	35.551	36.5476	23.3687	26.4972	Carhsp1	16	8658580	8672155	-	2858	protein_coding	calcium regulated heat stable protein 1 [Source:MGI Symbol;Acc:MGI:1196368]	CSD
ENSMUSG00000026879	134.335	337.034	196.664	285.625	330.084	300.979	Gsn	2	35256380	35307892	+	3157	protein_coding	gelsolin [Source:MGI Symbol;Acc:MGI:95851]	-
ENSMUSG00000083836	3.05242	0.0114544	0.338214	0.110921	0.305255	0.135265	Ldha-ps2	4	119334389	119335445	-	1057	processed_pseudogene	lactate dehydrogenase A, pseudogene 2 [Source:MGI Symbol;Acc:MGI:96761]	-
ENSMUSG00000112539	9.84382	0	0.212274	0	1.42457	0	Gm40787	10	121488986	121490147	+	317	lincRNA	predicted gene, 40787 [Source:MGI Symbol;Acc:MGI:5623672]	-
ENSMUSG00000027298	0.214682	1.96548	2.09468	2.04112	3.27882	2.9843	Tyro3	2	119797733	119818104	+	6198	protein_coding	TYRO3 protein tyrosine kinase 3 [Source:MGI Symbol;Acc:MGI:104294]	-
ENSMUSG00000043091	65.2177	18.8222	19.9246	13.2377	14.9475	19.2797	Tuba1c	15	99029891	99038110	+	2287	protein_coding	tubulin, alpha 1C [Source:MGI Symbol;Acc:MGI:1095409]	-
ENSMUSG00000026582	1.91301	0.0207886	0.317978	0.35466	0.188367	0.0441886	Sele	1	164048234	164057677	+	2912	protein_coding	selectin, endothelial cell [Source:MGI Symbol;Acc:MGI:98278]	-
ENSMUSG00000027048	0.754042	0.0117638	0.220049	0.11248	0.00263956	0	Abcb11	2	69238282	69342616	-	5146	protein_coding	ATP-binding cassette, sub-family B (MDR/TAP), member 11 [Source:MGI Symbol;Acc:MGI:1351619]	-
ENSMUSG00000030895	18.3447	2.66828	2.55602	3.59347	0.874878	3.55706	Hpx	7	105591613	105600137	-	1499	protein_coding	hemopexin [Source:MGI Symbol;Acc:MGI:105112]	-
ENSMUSG00000045502	10.674	0.73096	2.102	0.479851	1.69704	1.34335	Hcar2	5	123863570	123865499	-	1930	protein_coding	hydroxycarboxylic acid receptor 2 [Source:MGI Symbol;Acc:MGI:1933383]	-
ENSMUSG00000035296	0.0411458	1.1908	1.8593	0.425313	0.567376	1.06715	Sgcg	14	61219115	61258490	-	3822	protein_coding	sarcoglycan, gamma (dystrophin-associated glycoprotein) [Source:MGI Symbol;Acc:MGI:1346524]	-
ENSMUSG00000018126	0.0115293	0.953254	1.6177	0.902658	0.442675	0.665985	Baiap2l2	15	79258195	79285537	-	2728	protein_coding	BAI1-associated protein 2-like 2 [Source:MGI Symbol;Acc:MGI:2652819]	-
ENSMUSG00000102329	1.93856	0.00718534	0.973491	0.623007	0.4135	0	Gm10851	2	11521706	11530836	+	1685	antisense	predicted gene 10851 [Source:MGI Symbol;Acc:MGI:3641824]	-
ENSMUSG00000030218	580.721	1241.39	838.392	1161.15	670.421	724.813	Mgp	6	136872435	136875823	-	1187	protein_coding	matrix Gla protein [Source:MGI Symbol;Acc:MGI:96976]	-
ENSMUSG00000104467	3.03669	0.0349518	0.348695	0.237636	0.109152	0.280307	Gm37660	9	71840005	71841736	-	1732	TEC	predicted gene, 37660 [Source:MGI Symbol;Acc:MGI:5610888]	-
ENSMUSG00000112375	7.78666	0.262387	0.187497	1.30303	0.928355	0.412438	Gm38560	10	82845733	82859008	-	646	bidirectional_promoter_lncRNA	predicted gene, 38560 [Source:MGI Symbol;Acc:MGI:5621445]	-
ENSMUSG00000059920	12.0625	5.27577	5.72465	5.02295	5.18741	6.12098	4930453N24Rik	16	64751751	64771161	-	5948	protein_coding	RIKEN cDNA 4930453N24 gene [Source:MGI Symbol;Acc:MGI:1914859]	-
ENSMUSG00000049028	0.449902	0	0.0834946	0.183562	0.0268019	0.0653814	Olfr873	9	20298532	20303599	+	5068	protein_coding	olfactory receptor 873 [Source:MGI Symbol;Acc:MGI:3030707]	-
ENSMUSG00000078139	2.61567	0.175361	0.116729	0.258493	0.0634074	0.726573	AK157302	13	21495223	21497146	+	1924	protein_coding	cDNA sequence AK157302 [Source:MGI Symbol;Acc:MGI:3574096]	-
ENSMUSG00000052837	64.6121	17.2143	17.6198	34.1138	24.1106	31.315	Junb	8	84974484	84978718	-	2301	protein_coding	jun B proto-oncogene [Source:MGI Symbol;Acc:MGI:96647]	TF_bZIP
ENSMUSG00000024953	151.444	50.3714	71.4421	66.2491	105.956	116.079	Prdx5	19	6906697	6910106	-	2139	protein_coding	peroxiredoxin 5 [Source:MGI Symbol;Acc:MGI:1859821]	-
ENSMUSG00000030930	6.80216	1.79438	1.97557	1.27574	1.36361	1.52754	Chst15	7	132235780	132317228	-	6754	protein_coding	carbohydrate (N-acetylgalactosamine 4-sulfate 6-O) sulfotransferase 15 [Source:MGI Symbol;Acc:MGI:1924840]	-
ENSMUSG00000113559	1.32899	0	0	0.202241	0	0	Gm40987	13	65976343	65982791	-	1656	lincRNA	predicted gene, 40987 [Source:MGI Symbol;Acc:MGI:5623872]	-
ENSMUSG00000031584	50.373	16.2388	19.7679	17.7687	25.9628	29.7859	Gsr	8	33652523	33698163	+	2754	protein_coding	glutathione reductase [Source:MGI Symbol;Acc:MGI:95804]	-
ENSMUSG00000045392	5.68016	0.855932	0.518961	1.54629	0.704251	0.986922	Olfr1033	2	86020633	86045171	+	4261	protein_coding	olfactory receptor 1033 [Source:MGI Symbol;Acc:MGI:3030867]	-
ENSMUSG00000020427	44.6658	12.0131	8.9871	12.0026	5.57842	7.14996	Igfbp3	11	7206086	7213923	-	3130	protein_coding	insulin-like growth factor binding protein 3 [Source:MGI Symbol;Acc:MGI:96438]	-
ENSMUSG00000073924	0.755017	0	0	0.0707431	0.00491231	0	Olfr656	7	104613955	104621603	+	4091	protein_coding	olfactory receptor 656 [Source:MGI Symbol;Acc:MGI:3030490]	-
ENSMUSG00000057176	0.110164	2.26664	3.50487	3.34152	7.54318	8.29399	Ccdc189	7	127582383	127588595	-	3426	protein_coding	coiled-coil domain containing 189 [Source:MGI Symbol;Acc:MGI:2685012]	-
ENSMUSG00000088071	17.968	0	0.129405	0	0	4.46052	Gm22818	15	86212554	86212657	-	104	snRNA	predicted gene, 22818 [Source:MGI Symbol;Acc:MGI:5452595]	-
ENSMUSG00000033208	0.0345585	1.64591	3.04219	1.28554	4.48641	6.13336	S100b	10	76253853	76261159	+	1484	protein_coding	S100 protein, beta polypeptide, neural [Source:MGI Symbol;Acc:MGI:98217]	-
ENSMUSG00000094162	75.6415	7.15219	37.6119	2.52391	7.50329	5.45862	Ccl19-ps3	4	42132559	42134171	+	324	unprocessed_pseudogene	chemokine (C-C motif) ligand 19, pseudogene 3 [Source:MGI Symbol;Acc:MGI:1891391]	-
ENSMUSG00000050702	1.42593	0.0188783	0.0139898	0.169101	0.0208901	0.0371556	4930563M21Rik	9	55962589	56010550	-	1924	protein_coding	RIKEN cDNA 4930563M21 gene [Source:MGI Symbol;Acc:MGI:1922508]	-
ENSMUSG00000097307	3.17496	0	0.203118	0.336145	0	0	Gm26834	16	29811058	29837814	+	950	lincRNA	predicted gene, 26834 [Source:MGI Symbol;Acc:MGI:5477328]	-
ENSMUSG00000027164	8.66821	2.12914	1.70762	2.38454	2.43166	2.72593	Traf6	2	101678429	101701669	+	7883	protein_coding	TNF receptor-associated factor 6 [Source:MGI Symbol;Acc:MGI:108072]	-
ENSMUSG00000095562	0.274762	5.66873	2.21277	5.27382	3.87005	2.9545	Gm21887	X	170009659	170019281	+	759	protein_coding	predicted gene, 21887 [Source:MGI Symbol;Acc:MGI:5434051]	-
ENSMUSG00000041438	8.9562	2.5581	2.79108	2.47539	2.90447	2.63549	Utp4	8	106893636	106923088	+	3451	protein_coding	UTP4 small subunit processome component [Source:MGI Symbol;Acc:MGI:1096573]	-
ENSMUSG00000054932	1.1556	0.035948	0.0639342	0.399794	0.505469	0.375824	Afp	5	90490737	90508907	+	3368	protein_coding	alpha fetoprotein [Source:MGI Symbol;Acc:MGI:87951]	-
ENSMUSG00000032515	16.6482	3.46606	7.29662	4.93238	5.54004	4.44866	Csrnp1	9	119971163	119984658	-	3473	protein_coding	cysteine-serine-rich nuclear protein 1 [Source:MGI Symbol;Acc:MGI:2387989]	-
ENSMUSG00000059498	22.4133	6.44231	9.36084	5.47847	3.75963	5.44794	Fcgr3	1	171051174	171064935	-	1736	protein_coding	Fc receptor, IgG, low affinity III [Source:MGI Symbol;Acc:MGI:95500]	-
ENSMUSG00000018930	85.7627	2.03956	0.203911	1.65686	1.85268	0.0433257	Ccl4	11	83662584	83664683	+	660	protein_coding	chemokine (C-C motif) ligand 4 [Source:MGI Symbol;Acc:MGI:98261]	-
ENSMUSG00000035941	8.24882	2.85858	2.88906	3.81415	3.86312	3.20924	Ibtk	9	85687360	85749334	-	8628	protein_coding	inhibitor of Bruton agammaglobulinemia tyrosine kinase [Source:MGI Symbol;Acc:MGI:1918677]	-
ENSMUSG00000026341	90.4471	33.7192	37.848	34.494	29.937	30.6402	Actr3	1	125392905	125435727	-	4631	protein_coding	ARP3 actin-related protein 3 [Source:MGI Symbol;Acc:MGI:1921367]	-
ENSMUSG00000024778	43.0128	9.75975	10.3612	8.89214	14.8048	11.7849	Fas	19	34290659	34327770	+	1801	protein_coding	Fas (TNF receptor superfamily member 6) [Source:MGI Symbol;Acc:MGI:95484]	-
ENSMUSG00000096847	0.903793	0.00750608	0.287479	0.209327	0.0406443	0.032501	Tmem151b	17	45541952	45549677	-	4839	protein_coding	transmembrane protein 151B [Source:MGI Symbol;Acc:MGI:2685169]	-
ENSMUSG00000018932	26.8949	9.47509	12.3232	11.6066	18.7202	13.7533	Map2k3	11	60932033	60952811	+	3314	protein_coding	mitogen-activated protein kinase kinase 3 [Source:MGI Symbol;Acc:MGI:1346868]	-
ENSMUSG00000024539	26.7011	7.10309	6.17411	8.19825	4.73456	7.13092	Ptpn2	18	67665511	67724595	-	3125	protein_coding	protein tyrosine phosphatase, non-receptor type 2 [Source:MGI Symbol;Acc:MGI:97806]	-
ENSMUSG00000001056	58.6845	20.9487	29.5548	26.3396	28.546	25.0897	Nhp2	11	51619735	51623714	+	1146	protein_coding	NHP2 ribonucleoprotein [Source:MGI Symbol;Acc:MGI:1098547]	-
ENSMUSG00000045613	0.10743	1.16611	2.20349	1.11055	1.34385	1.45221	Chrm2	6	36388084	36528414	+	6053	protein_coding	cholinergic receptor, muscarinic 2, cardiac [Source:MGI Symbol;Acc:MGI:88397]	-
ENSMUSG00000022148	4.40217	0.830119	2.74007	1.08464	1.5005	1.12349	Fyb	15	6522853	6663313	+	5384	protein_coding	FYN binding protein [Source:MGI Symbol;Acc:MGI:1346327]	-
ENSMUSG00000037361	30.8341	12.0913	15.4668	15.1378	12.6451	16.2505	Sf3b6	12	4817544	4827659	+	2854	protein_coding	splicing factor 3B, subunit 6 [Source:MGI Symbol;Acc:MGI:1913305]	-
ENSMUSG00000040554	0.726079	0.00767013	0.422914	0.129591	0.108392	0.174522	Aipl1	11	72027963	72037509	-	3157	protein_coding	aryl hydrocarbon receptor-interacting protein-like 1 [Source:MGI Symbol;Acc:MGI:2148800]	-
ENSMUSG00000049130	13.7425	1.77206	2.27076	1.69323	0.962882	0.965343	C5ar1	7	16246743	16259540	-	2570	protein_coding	complement component 5a receptor 1 [Source:MGI Symbol;Acc:MGI:88232]	-
ENSMUSG00000099608	1.27007	0	0.352983	0.0969223	0	0	4933411E06Rik	1	50107470	50108962	+	1493	lincRNA	RIKEN cDNA 4933411E06 gene [Source:MGI Symbol;Acc:MGI:1918431]	-
ENSMUSG00000074115	13.3352	0	0.261377	0.0116792	0.0219261	0	Saa1	7	46740497	46742980	-	2478	protein_coding	serum amyloid A 1 [Source:MGI Symbol;Acc:MGI:98221]	-
ENSMUSG00000036466	1.03722	0.182694	0.68697	0.255005	0.165519	0.392614	Megf11	9	64385626	64709205	+	11181	protein_coding	multiple EGF-like-domains 11 [Source:MGI Symbol;Acc:MGI:1920951]	-
ENSMUSG00000028381	21.9195	6.72369	5.71105	5.97341	5.36707	4.94809	Ugcg	4	59189257	59222833	+	5212	protein_coding	UDP-glucose ceramide glucosyltransferase [Source:MGI Symbol;Acc:MGI:1332243]	-
ENSMUSG00000026358	1.51399	0.0771832	0.558222	0.379018	0.314483	0.176985	Rgs1	1	144242296	144249242	-	6947	protein_coding	regulator of G-protein signaling 1 [Source:MGI Symbol;Acc:MGI:1354694]	-
ENSMUSG00000107612	6.4149	0	0.404929	0	0	0	Gm44163	6	76455391	76455865	-	475	processed_pseudogene	predicted gene, 44163 [Source:MGI Symbol;Acc:MGI:5690555]	-
ENSMUSG00000090411	0.216163	0	0.19091	0	0	0	Vmn1r174	7	23752270	23762403	+	9058	protein_coding	vomeronasal 1 receptor 174 [Source:MGI Symbol;Acc:MGI:3033491]	-
ENSMUSG00000041220	2.3419	0.457423	2.36068	0.423711	0.70525	0.66379	Elovl6	3	129532355	129638495	+	6431	protein_coding	ELOVL family member 6, elongation of long chain fatty acids (yeast) [Source:MGI Symbol;Acc:MGI:2156528]	-
ENSMUSG00000033715	41.2871	13.3818	12.546	17.985	40.2675	28.2194	Akr1c14	13	4049011	4090688	+	3239	protein_coding	aldo-keto reductase family 1, member C14 [Source:MGI Symbol;Acc:MGI:2145458]	-
ENSMUSG00000025283	127.277	46.7767	53.1467	51.7036	69.6387	56.2043	Sat1	X	155213132	155216449	-	2774	protein_coding	spermidine/spermine N1-acetyl transferase 1 [Source:MGI Symbol;Acc:MGI:98233]	-
ENSMUSG00000103223	1.33098	0	0.349095	0.314149	0.0122869	0.0299731	Gm37730	2	11365241	11367451	-	2211	TEC	predicted gene, 37730 [Source:MGI Symbol;Acc:MGI:5610958]	-
ENSMUSG00000019832	12.355	3.22441	3.90688	3.79267	2.54636	3.15663	Rab32	10	10545002	10558265	-	2339	protein_coding	RAB32, member RAS oncogene family [Source:MGI Symbol;Acc:MGI:1915094]	-
ENSMUSG00000039774	0	0.904834	3.18073	0.785965	3.6516	4.11873	Galnt12	4	47091909	47123070	+	2288	protein_coding	polypeptide N-acetylgalactosaminyltransferase 12 [Source:MGI Symbol;Acc:MGI:2444664]	-
ENSMUSG00000029379	60.0791	0.0415345	0	0.158185	0.00388313	0.0490479	Cxcl3	5	90786103	90789600	+	3498	protein_coding	chemokine (C-X-C motif) ligand 3 [Source:MGI Symbol;Acc:MGI:3037818]	-
ENSMUSG00000089746	4.73235	0	0.0422548	0.458204	0.0639711	0	Gm3513	3	79551314	79552193	-	637	sense_intronic	predicted gene 3513 [Source:MGI Symbol;Acc:MGI:3781690]	-
ENSMUSG00000069670	0.746941	0.0102822	0.0485751	0.104877	0.082143	0.16137	Nkain2	10	31689310	32890462	-	4710	protein_coding	Na+/K+ transporting ATPase interacting 2 [Source:MGI Symbol;Acc:MGI:1923447]	-
ENSMUSG00000023078	10.4409	1.20517	9.37078	1.31636	7.1065	3.19685	Cxcl13	5	95956951	95961068	+	1150	protein_coding	chemokine (C-X-C motif) ligand 13 [Source:MGI Symbol;Acc:MGI:1888499]	-
ENSMUSG00000068742	6.12589	2.39223	3.97014	3.72959	9.50685	9.01667	Cry2	2	92403646	92434043	-	6320	protein_coding	cryptochrome 2 (photolyase-like) [Source:MGI Symbol;Acc:MGI:1270859]	-
ENSMUSG00000026656	6.12656	1.31272	1.85199	1.00231	0.935328	1.06594	Fcgr2b	1	170958617	170976547	-	5790	protein_coding	Fc receptor, IgG, low affinity IIb [Source:MGI Symbol;Acc:MGI:95499]	-
ENSMUSG00000018566	0.0271293	0.949209	1.99225	0.65119	1.47645	0.430403	Slc2a4	11	69942539	69948188	-	3478	protein_coding	solute carrier family 2 (facilitated glucose transporter), member 4 [Source:MGI Symbol;Acc:MGI:95758]	-
ENSMUSG00000110301	2.38679	0	0.983292	0.0439499	0.0103137	0	Gm35363	7	101525376	101538330	-	1317	lincRNA	predicted gene, 35363 [Source:MGI Symbol;Acc:MGI:5594522]	-
ENSMUSG00000001473	67.6139	15.73	18.5225	15.9934	7.93514	7.03897	Tubb6	18	67390717	67402748	+	1757	protein_coding	tubulin, beta 6 class V [Source:MGI Symbol;Acc:MGI:1915201]	-
ENSMUSG00000026976	0.481598	0	0.358713	0.239399	0.0257265	0.0109339	Pax8	2	24420560	24475599	-	6061	protein_coding	paired box 8 [Source:MGI Symbol;Acc:MGI:97492]	PAX
ENSMUSG00000036908	3.31445	10.1974	15.9149	5.18253	11.8512	11.4045	Unc93b1	19	3935186	3949340	+	2841	protein_coding	unc-93 homolog B1, TLR signaling regulator [Source:MGI Symbol;Acc:MGI:1859307]	-
ENSMUSG00000021758	1.39223	0.0401702	0.302408	0.26968	0.0868641	0.220774	Ddx4	13	112598333	112652475	-	3014	protein_coding	DEAD (Asp-Glu-Ala-Asp) box polypeptide 4 [Source:MGI Symbol;Acc:MGI:102670]	-
ENSMUSG00000085024	17.4486	2.26946	5.11585	3.27212	3.0667	4.11751	C230035I16Rik	13	23427975	23431022	-	917	lincRNA	RIKEN cDNA C230035I16 gene [Source:MGI Symbol;Acc:MGI:2444850]	-
ENSMUSG00000083708	0	4.19519	2.3502	3.65398	3.00379	1.36067	Gm13123	4	144247777	144248268	+	492	processed_pseudogene	predicted gene 13123 [Source:MGI Symbol;Acc:MGI:3651473]	-
ENSMUSG00000087138	0.0318339	1.4711	1.6444	1.52289	2.18111	2.97858	Gm15545	7	44986900	44994597	+	1976	antisense	predicted gene 15545 [Source:MGI Symbol;Acc:MGI:3782994]	-
ENSMUSG00000037098	0.825227	3.78631	2.9213	2.58311	2.95182	2.72157	Rab11fip3	17	25989036	26069409	-	6789	protein_coding	RAB11 family interacting protein 3 (class II) [Source:MGI Symbol;Acc:MGI:2444431]	-
ENSMUSG00000020614	0.306081	3.08758	2.02842	2.28842	1.04109	1.53047	Fam20a	11	109669749	109722279	-	3634	protein_coding	family with sequence similarity 20, member A [Source:MGI Symbol;Acc:MGI:2388266]	-
ENSMUSG00000039232	16.2287	4.00937	2.89988	5.31985	5.25985	5.18457	Stx11	10	12938209	12964298	-	4209	protein_coding	syntaxin 11 [Source:MGI Symbol;Acc:MGI:1921982]	-
ENSMUSG00000048534	5.40029	0.540524	1.4606	0.686746	1.86375	1.16135	Jaml	9	45079183	45108534	+	3108	protein_coding	junction adhesion molecule like [Source:MGI Symbol;Acc:MGI:2685484]	-
ENSMUSG00000110588	1.08268	0	0.207687	0.0108597	0.0377041	0.0482842	Gm45774	8	94170748	94173412	-	2665	antisense	predicted gene 45774 [Source:MGI Symbol;Acc:MGI:5804889]	-
ENSMUSG00000052387	0.402658	0.00901176	0.345681	0.176289	0.173794	0.250206	Trpm3	19	22139119	22989884	+	8061	protein_coding	transient receptor potential cation channel, subfamily M, member 3 [Source:MGI Symbol;Acc:MGI:2443101]	-
ENSMUSG00000036989	4.50188	11.5357	10.1209	12.2315	9.92396	13.5982	Trim3	7	105604463	105633571	-	4569	protein_coding	tripartite motif-containing 3 [Source:MGI Symbol;Acc:MGI:1860040]	-
ENSMUSG00000075389	0	1.12228	1.59083	1.18863	1.19311	1.11498	2810410L24Rik	11	120185400	120189852	-	3028	processed_transcript	RIKEN cDNA 2810410L24 gene [Source:MGI Symbol;Acc:MGI:1923627]	-
ENSMUSG00000026683	0.0148802	0.544561	0.137047	0.374141	0.177408	0.227415	Nuf2	1	169497934	169531464	-	6341	protein_coding	NUF2, NDC80 kinetochore complex component [Source:MGI Symbol;Acc:MGI:1914227]	-
ENSMUSG00000026628	13.3778	2.48824	5.67823	3.84259	4.82274	3.78657	Atf3	1	191170296	191218039	-	2154	protein_coding	activating transcription factor 3 [Source:MGI Symbol;Acc:MGI:109384]	TF_bZIP
ENSMUSG00000021367	23.7272	4.41135	1.29659	5.32857	3.00205	3.67414	Edn1	13	42301476	42307990	+	2139	protein_coding	endothelin 1 [Source:MGI Symbol;Acc:MGI:95283]	-
ENSMUSG00000030427	2.97771	0.336027	0.179701	0.405332	0.0851151	0.00937539	Lilra6	7	3908280	3915503	-	3050	protein_coding	leukocyte immunoglobulin-like receptor, subfamily A (with TM domain), member 6 [Source:MGI Symbol;Acc:MGI:1195969]	-
ENSMUSG00000105597	2.69896	0	0.324437	0.215776	0	0.106598	4633401B06Rik	3	121787500	121788572	-	1073	TEC	RIKEN cDNA 4633401B06 gene [Source:MGI Symbol;Acc:MGI:1918078]	-
ENSMUSG00000113960	2.75444	0	0.345004	0	0.0362864	0	4933412O06Rik	13	15781664	15802630	-	1123	lincRNA	RIKEN cDNA 4933412O06 gene [Source:MGI Symbol;Acc:MGI:1918321]	-
ENSMUSG00000039960	18.7146	5.69716	4.9044	5.85521	4.54537	5.98233	Rhou	8	123653929	123663884	+	3806	protein_coding	ras homolog family member U [Source:MGI Symbol;Acc:MGI:1916831]	-
ENSMUSG00000024190	84.8018	24.4029	23.6546	32.7944	26.4235	19.6769	Dusp1	17	26505590	26508519	-	2697	protein_coding	dual specificity phosphatase 1 [Source:MGI Symbol;Acc:MGI:105120]	-
ENSMUSG00000050445	0	1.07363	0.286017	0.119491	0.239604	0.352532	Cyp8b1	9	121914356	121916305	-	1950	protein_coding	cytochrome P450, family 8, subfamily b, polypeptide 1 [Source:MGI Symbol;Acc:MGI:1338044]	-
ENSMUSG00000019970	37.5816	12.9782	10.732	10.563	4.80457	5.53576	Sgk1	10	21882184	21999903	+	4903	protein_coding	serum/glucocorticoid regulated kinase 1 [Source:MGI Symbol;Acc:MGI:1340062]	-
ENSMUSG00000041481	19.5384	3.88111	8.78268	2.7499	8.60087	7.09523	Serpina3g	12	104236245	104241939	+	2105	protein_coding	serine (or cysteine) peptidase inhibitor, clade A, member 3G [Source:MGI Symbol;Acc:MGI:105046]	-
ENSMUSG00000034640	14.7426	3.68374	2.81446	3.0467	4.29961	4.46894	Tiparp	3	65528410	65555518	+	4358	protein_coding	TCDD-inducible poly(ADP-ribose) polymerase [Source:MGI Symbol;Acc:MGI:2159210]	-
ENSMUSG00000056476	0.371935	0.0123321	0.0685493	0.229059	0.0777152	0.0951134	Med12l	3	59005825	59318682	+	12763	protein_coding	mediator complex subunit 12-like [Source:MGI Symbol;Acc:MGI:2139916]	-
ENSMUSG00000105762	0.833929	0	0.0785983	0.00844746	0.00792948	0	Gm43605	5	51510868	51514293	-	3426	TEC	predicted gene 43605 [Source:MGI Symbol;Acc:MGI:5663742]	-
ENSMUSG00000093818	189.869	3.79006	24.8912	103.935	0.799011	2.59885	Ighd3-1	12	113525313	113525329	-	17	IG_D_gene	immunoglobulin heavy diversity 3-1 [Source:MGI Symbol;Acc:MGI:4439891]	-
ENSMUSG00000021125	12.3126	1.31597	0.871378	0.796968	0.514523	1.87674	Arg2	12	79130777	79156301	+	1428	protein_coding	arginase type II [Source:MGI Symbol;Acc:MGI:1330806]	-
ENSMUSG00000028952	10.5769	2.50946	3.90792	2.10117	2.96939	2.11958	Zbtb48	4	152019774	152027671	-	3199	protein_coding	zinc finger and BTB domain containing 48 [Source:MGI Symbol;Acc:MGI:2140248]	ZBTB
ENSMUSG00000020120	35.3011	9.66116	7.11571	11.4106	17.1313	14.2632	Plek	11	16971206	17052381	-	4486	protein_coding	pleckstrin [Source:MGI Symbol;Acc:MGI:1860485]	-
ENSMUSG00000069662	117.931	42.9986	36.9766	43.736	24.0706	26.5531	Marcks	10	37133375	37138920	-	4048	protein_coding	myristoylated alanine rich protein kinase C substrate [Source:MGI Symbol;Acc:MGI:96907]	-
ENSMUSG00000108268	1.57233	0.00627647	0.0767442	0.634477	0.0208359	0	Gm44187	6	88040539	88042467	-	1929	TEC	predicted gene, 44187 [Source:MGI Symbol;Acc:MGI:5690579]	-
ENSMUSG00000005054	196.794	87.7402	95.8528	80.5006	79.6298	100.98	Cstb	10	78425669	78427622	+	603	protein_coding	cystatin B [Source:MGI Symbol;Acc:MGI:109514]	-
ENSMUSG00000002741	35.3523	13.4755	15.2335	18.1535	13.5169	13.601	Ykt6	11	5955693	5967780	+	2984	protein_coding	YKT6 v-SNARE homolog (S. cerevisiae) [Source:MGI Symbol;Acc:MGI:1927550]	-
ENSMUSG00000098854	2.65595	0.133475	0.502484	0.170782	0.0308289	0	Gm5118	8	87093307	87100987	+	2203	lincRNA	predicted gene 5118 [Source:MGI Symbol;Acc:MGI:3645880]	-
ENSMUSG00000085393	10.8456	0	0	0.107989	0	1.15396	Gm11280	13	21940374	21945197	-	268	bidirectional_promoter_lncRNA	predicted gene 11280 [Source:MGI Symbol;Acc:MGI:3705200]	-
ENSMUSG00000022613	1.74016	0	0	0	0	0	Miox	15	89334398	89337015	+	1651	protein_coding	myo-inositol oxygenase [Source:MGI Symbol;Acc:MGI:1891725]	-
ENSMUSG00000065836	21.0582	0	0	0	0.27719	0.394413	Gm23502	14	21812711	21812855	+	145	snRNA	predicted gene, 23502 [Source:MGI Symbol;Acc:MGI:5453279]	-
ENSMUSG00000027401	0.695419	0	0.00976407	0.18281	0	0.0865132	Tgm3	2	130012349	130050399	+	4135	protein_coding	transglutaminase 3, E polypeptide [Source:MGI Symbol;Acc:MGI:98732]	-
ENSMUSG00000027907	1548.54	648.877	674.727	704.68	711.668	824.947	S100a11	3	93520488	93526287	+	511	protein_coding	S100 calcium binding protein A11 [Source:MGI Symbol;Acc:MGI:1338798]	-
ENSMUSG00000015879	0.331951	0	0.44713	0.103606	0.0442525	0	Fam184b	5	45529705	45639614	-	8598	protein_coding	family with sequence similarity 184, member B [Source:MGI Symbol;Acc:MGI:2442958]	-
ENSMUSG00000077642	21.3551	0	0	0.885239	0	0	Gm24984	10	72527550	72527682	+	133	snoRNA	predicted gene, 24984 [Source:MGI Symbol;Acc:MGI:5454761]	-
ENSMUSG00000061115	17.6666	0	1.05725	3.25316	0.352566	0	Gm17113	7	29183036	29183383	+	171	processed_pseudogene	predicted gene 17113 [Source:MGI Symbol;Acc:MGI:4937940]	-
ENSMUSG00000010435	1.91863	0	1.19532	0.655314	0.061582	0.293332	Spaca7	8	12573029	12600744	+	979	protein_coding	sperm acrosome associated 7 [Source:MGI Symbol;Acc:MGI:1925884]	-
ENSMUSG00000108077	2.69574	0.0978469	0	0.668666	0.027404	0	6330415B21Rik	6	77380260	77382459	-	2200	TEC	RIKEN cDNA 6330415B21 gene [Source:MGI Symbol;Acc:MGI:1918003]	-
ENSMUSG00000027506	19.2547	6.35731	6.59431	7.66645	7.86116	8.53402	Tpd52	3	8925593	9004723	-	7487	protein_coding	tumor protein D52 [Source:MGI Symbol;Acc:MGI:107749]	-
ENSMUSG00000020130	15.1024	5.8844	5.71302	7.90684	6.18618	5.32152	Tbc1d15	10	115197872	115251467	-	4261	protein_coding	TBC1 domain family, member 15 [Source:MGI Symbol;Acc:MGI:1913937]	-
ENSMUSG00000030717	248.024	99.6475	87.5239	100.046	96.0359	135.897	Nupr1	7	126623249	126630861	-	2514	protein_coding	nuclear protein transcription regulator 1 [Source:MGI Symbol;Acc:MGI:1891834]	-
ENSMUSG00000056258	0.216984	0.00164636	0.0375159	0.124707	0.0201282	0	Kcnq3	15	65986387	66286642	-	14708	protein_coding	potassium voltage-gated channel, subfamily Q, member 3 [Source:MGI Symbol;Acc:MGI:1336181]	-
ENSMUSG00000026043	4.17322	16.9213	12.5066	10.2661	4.25502	7.32381	Col3a1	1	45311538	45349706	+	9816	protein_coding	collagen, type III, alpha 1 [Source:MGI Symbol;Acc:MGI:88453]	-
ENSMUSG00000065765	27.4119	0	0	1.42884	0	1.28681	Gm23851	6	124964285	124964387	+	103	snRNA	predicted gene, 23851 [Source:MGI Symbol;Acc:MGI:5453628]	-
ENSMUSG00000075256	0.687909	0.0137479	0.886323	0.284429	0.139644	0.0415621	Cerkl	2	79330543	79456785	-	5284	protein_coding	ceramide kinase-like [Source:MGI Symbol;Acc:MGI:3037816]	-
ENSMUSG00000030069	1.59659	0	1.12365	1.20461	0.0671684	0.149803	Prok2	6	99711299	99726392	-	1917	protein_coding	prokineticin 2 [Source:MGI Symbol;Acc:MGI:1354178]	-
ENSMUSG00000104284	0.844145	0	0.0321389	0.052718	0	0	Gm10862	2	4091140	4094489	+	3350	sense_intronic	predicted gene 10862 [Source:MGI Symbol;Acc:MGI:3641622]	-
ENSMUSG00000047787	0.965894	0.0515888	0.593648	0.632836	0.0162284	0.0993689	Flrt1	19	7092014	7105729	-	5859	protein_coding	fibronectin leucine rich transmembrane protein 1 [Source:MGI Symbol;Acc:MGI:3026647]	-
ENSMUSG00000117269	5.14603	0.0755133	0.879732	0.303918	0	0	AC151275.1	17	46407004	46407484	-	481	processed_pseudogene	ISG15 ubiquitin-like modifier (Isg15) pseudogene	-
ENSMUSG00000025784	48.7893	155.665	71.5329	149.296	58.1952	57.6036	Clec3b	9	123150946	123157432	+	992	protein_coding	C-type lectin domain family 3, member b [Source:MGI Symbol;Acc:MGI:104540]	-
ENSMUSG00000114778	2.39566	0	0.140923	0.340928	0.267549	0.205854	Gm9634	13	77553610	77554373	-	764	processed_pseudogene	predicted gene 9634 [Source:MGI Symbol;Acc:MGI:3780041]	-
ENSMUSG00000025145	2.60849	11.4001	17.855	18.0006	42.1985	36.4843	Lrrc45	11	120713925	120721128	+	3293	protein_coding	leucine rich repeat containing 45 [Source:MGI Symbol;Acc:MGI:2387183]	-
ENSMUSG00000086277	2.42996	0	0.275239	1.12725	0	0	4930558K02Rik	1	161942086	161979636	-	1167	protein_coding	RIKEN cDNA 4930558K02 gene [Source:MGI Symbol;Acc:MGI:1922618]	-
ENSMUSG00000060583	0.662405	0	0	0.22867	0	0	Olfr881	9	37991825	37996408	+	4237	protein_coding	olfactory receptor 881 [Source:MGI Symbol;Acc:MGI:3030715]	-
ENSMUSG00000016528	80.3264	30.7379	27.8165	26.9477	30.1206	30.1161	Mapkapk2	1	131053700	131097826	-	3041	protein_coding	MAP kinase-activated protein kinase 2 [Source:MGI Symbol;Acc:MGI:109298]	-
ENSMUSG00000044258	228.455	71.9354	37.4903	64.1251	62.2772	55.7123	Ctla2a	13	60934155	60936625	-	2108	protein_coding	cytotoxic T lymphocyte-associated protein 2 alpha [Source:MGI Symbol;Acc:MGI:88554]	-
ENSMUSG00000026202	17.5432	5.81196	8.19501	5.67587	9.40808	8.93722	Tuba4a	1	75214228	75219865	-	3701	protein_coding	tubulin, alpha 4A [Source:MGI Symbol;Acc:MGI:1095410]	-
ENSMUSG00000038379	0	0.443219	0.228971	0.0949383	0.085747	0.0610382	Ttk	9	83834689	83872389	+	4919	protein_coding	Ttk protein kinase [Source:MGI Symbol;Acc:MGI:1194921]	-
ENSMUSG00000066554	5.09837	0.306549	3.03584	0.443693	0.196926	1.88939	Gm10167	5	148182899	148184377	-	1479	processed_pseudogene	predicted pseudogene 10167 [Source:MGI Symbol;Acc:MGI:3704263]	-
ENSMUSG00000015837	136.246	55.7792	51.7895	59.3219	63.6781	62.8779	Sqstm1	11	50199366	50210827	-	3356	protein_coding	sequestosome 1 [Source:MGI Symbol;Acc:MGI:107931]	-
ENSMUSG00000030525	0	0.525465	1.44203	0.962028	0.0179672	0.0793423	Chrna7	7	63098692	63212569	-	4505	protein_coding	cholinergic receptor, nicotinic, alpha polypeptide 7 [Source:MGI Symbol;Acc:MGI:99779]	-
ENSMUSG00000049723	0	0.44239	0.34581	0.0974079	0.141563	0.32912	Mmp12	9	7344381	7369499	+	7237	protein_coding	matrix metallopeptidase 12 [Source:MGI Symbol;Acc:MGI:97005]	-
ENSMUSG00000039199	3.70115	14.8132	17.7057	17.8084	45.9931	49.7569	Zdhhc1	8	105472423	105496902	-	4219	protein_coding	zinc finger, DHHC domain containing 1 [Source:MGI Symbol;Acc:MGI:1918046]	-
ENSMUSG00000092505	10.9855	0	0	0.113494	0	0	Gm19246	7	42488801	42489055	+	255	processed_pseudogene	predicted gene, 19246 [Source:MGI Symbol;Acc:MGI:5011431]	-
ENSMUSG00000018470	0	0.771332	0.990328	0.27489	0.0824828	0.31768	Kcnab3	11	69326258	69333042	+	2865	protein_coding	potassium voltage-gated channel, shaker-related subfamily, beta member 3 [Source:MGI Symbol;Acc:MGI:1336208]	-
ENSMUSG00000026558	7.31892	1.76904	1.97389	1.18354	0.990328	0.812642	Uck2	1	167222883	167285320	-	5464	protein_coding	uridine-cytidine kinase 2 [Source:MGI Symbol;Acc:MGI:1931744]	-
ENSMUSG00000032377	4.51543	12.1595	6.90796	11.6943	6.98701	7.61579	Plscr4	9	92457373	92492456	+	3590	protein_coding	phospholipid scramblase 4 [Source:MGI Symbol;Acc:MGI:2143267]	-
ENSMUSG00000051351	9.90485	3.17588	1.42964	2.77876	2.15021	2.22347	Zfp46	4	136284683	136293942	+	5212	protein_coding	zinc finger protein 46 [Source:MGI Symbol;Acc:MGI:99192]	zf-C2H2
ENSMUSG00000039032	1.71142	0	0.652328	0.278973	0.220537	0	Tsga13	6	30896981	30915573	-	1674	protein_coding	testis specific gene A13 [Source:MGI Symbol;Acc:MGI:1891413]	-
ENSMUSG00000113450	0.023936	1.11037	0.814198	0.523783	0.641483	0.371447	Gm49359	13	62453016	62466832	-	2628	protein_coding	predicted gene, 49359 [Source:MGI Symbol;Acc:MGI:6121568]	-
ENSMUSG00000025492	1406.77	606.446	516.221	579.877	427.33	577.889	Ifitm3	7	141009586	141010770	-	678	protein_coding	interferon induced transmembrane protein 3 [Source:MGI Symbol;Acc:MGI:1913391]	-
ENSMUSG00000107470	4.64213	0.474652	1.93634	2.2011	1.53392	0.506069	Gm3375	7	3181093	3181888	+	796	processed_pseudogene	predicted gene 3375 [Source:MGI Symbol;Acc:MGI:3781553]	-
ENSMUSG00000021371	7.76304	3.00283	4.21717	3.0431	4.09008	3.44888	Mcur1	13	43538393	43560191	-	7076	protein_coding	mitochondrial calcium uniporter regulator 1 [Source:MGI Symbol;Acc:MGI:1923387]	-
ENSMUSG00000057465	10.3128	0	0.0106896	0	0	0	Saa2	7	46751790	46754313	+	2518	protein_coding	serum amyloid A 2 [Source:MGI Symbol;Acc:MGI:98222]	-
ENSMUSG00000026604	4.84098	1.94196	1.61253	2.65342	2.85121	2.96616	Ptpn14	1	189728268	189876695	+	13413	protein_coding	protein tyrosine phosphatase, non-receptor type 14 [Source:MGI Symbol;Acc:MGI:102467]	-
ENSMUSG00000034459	22.3714	8.81251	8.43263	8.7862	10.0404	12.2881	Ifit1	19	34640871	34650009	+	2656	protein_coding	interferon-induced protein with tetratricopeptide repeats 1 [Source:MGI Symbol;Acc:MGI:99450]	-
ENSMUSG00000034858	0.696298	2.4433	3.26806	2.26189	4.99933	3.47827	Fam214a	9	74952884	75032468	+	6637	protein_coding	family with sequence similarity 214, member A [Source:MGI Symbol;Acc:MGI:2387648]	-
ENSMUSG00000111030	3.20627	0.0133194	0.258364	0.455064	0	0	Gm47234	9	44634195	44635103	+	909	TEC	predicted gene, 47234 [Source:MGI Symbol;Acc:MGI:6096052]	-
ENSMUSG00000060843	0.884644	0.0150776	0.541817	0.309102	0.0582368	0.103212	Ctnna3	10	63430098	65003667	+	7227	protein_coding	catenin (cadherin associated protein), alpha 3 [Source:MGI Symbol;Acc:MGI:2661445]	-
ENSMUSG00000025716	0.36939	0	0.089109	0.16107	0.00171008	0	Myo3a	2	22227503	22618252	+	7943	protein_coding	myosin IIIA [Source:MGI Symbol;Acc:MGI:2183924]	-
ENSMUSG00000040596	3.80135	0.931421	0.680232	1.4544	1.10873	0.811203	Pogk	1	166384622	166409863	-	9586	protein_coding	pogo transposable element with KRAB domain [Source:MGI Symbol;Acc:MGI:1918842]	-
ENSMUSG00000026135	0.00553974	0.267953	0.791141	0.298268	0.167734	0.0660364	Zfp142	1	74565127	74588246	-	11355	protein_coding	zinc finger protein 142 [Source:MGI Symbol;Acc:MGI:1924514]	zf-C2H2
ENSMUSG00000022306	0.0164911	0.427393	0.192339	0.296123	0.223311	0.181681	Zfpm2	15	40655035	41104592	+	9536	protein_coding	zinc finger protein, multitype 2 [Source:MGI Symbol;Acc:MGI:1334444]	zf-C2H2
ENSMUSG00000023802	1.52724	0	0.586843	0.0807506	0	0.063828	Nox3	17	3635240	3696261	-	1792	protein_coding	NADPH oxidase 3 [Source:MGI Symbol;Acc:MGI:2681162]	-
ENSMUSG00000106734	1.23432	4.7435	4.368	4.83277	8.86139	12.7195	Gm20559	6	3333194	3346128	-	4690	processed_transcript	predicted gene, 20559 [Source:MGI Symbol;Acc:MGI:5295666]	-
ENSMUSG00000038545	0.563888	2.40383	2.47525	2.61809	2.43282	2.60079	Cul7	17	46650337	46664364	+	7410	protein_coding	cullin 7 [Source:MGI Symbol;Acc:MGI:1913765]	-
ENSMUSG00000062961	0.594401	0.00419301	0.00233042	0.170645	0	0	Ccdc177	12	80754043	80760687	-	5775	protein_coding	coiled-coil domain containing 177 [Source:MGI Symbol;Acc:MGI:2686414]	-
ENSMUSG00000041754	6.62288	0.658846	0.348304	1.02772	0.776137	0.143838	Trem3	17	48247777	48258841	+	994	protein_coding	triggering receptor expressed on myeloid cells 3 [Source:MGI Symbol;Acc:MGI:1930003]	-
ENSMUSG00000112021	1.69578	0.0285045	0.568762	0.153307	0.0479689	0	Gm30346	10	78591713	78593411	+	1699	TEC	predicted gene, 30346 [Source:MGI Symbol;Acc:MGI:5589505]	-
ENSMUSG00000060703	50.4267	10.5929	8.76452	8.67147	7.41164	6.14783	Cd302	2	60251993	60284488	-	1354	protein_coding	CD302 antigen [Source:MGI Symbol;Acc:MGI:1913455]	-
ENSMUSG00000030452	2.83472	0.551043	0.923017	0.495566	1.12808	1.12795	Nipa2	7	55931287	55962476	-	7068	protein_coding	non imprinted in Prader-Willi/Angelman syndrome 2 homolog (human) [Source:MGI Symbol;Acc:MGI:1913918]	-
ENSMUSG00000097007	1.32248	0.0650373	0.274154	0.470715	0.00553007	0.0118031	4930432B10Rik	10	11244790	11281221	-	3634	bidirectional_promoter_lncRNA	RIKEN cDNA 4930432B10 gene [Source:MGI Symbol;Acc:MGI:1921869]	-
ENSMUSG00000038459	20.1892	8.03126	6.27719	7.31551	5.47755	5.88659	Abhd17c	7	84109356	84151893	-	4606	protein_coding	abhydrolase domain containing 17C [Source:MGI Symbol;Acc:MGI:1917428]	-
ENSMUSG00000033036	0.0514125	2.90457	1.2399	2.44622	1.57155	1.95944	Gm7879	5	43913144	43913917	+	774	protein_coding	predicted pseudogene 7879 [Source:MGI Symbol;Acc:MGI:3645078]	-
ENSMUSG00000074896	67.3991	25.4887	15.966	26.3705	34.4919	33.5784	Ifit3	19	34583531	34588731	+	1745	protein_coding	interferon-induced protein with tetratricopeptide repeats 3 [Source:MGI Symbol;Acc:MGI:1101055]	-
ENSMUSG00000018395	2.22551	6.28273	4.86995	3.99581	6.92643	9.26347	Kif3a	11	53567379	53601967	+	3586	protein_coding	kinesin family member 3A [Source:MGI Symbol;Acc:MGI:107689]	-
ENSMUSG00000045871	0	0.451716	0.684282	0.220865	0.140372	0.101161	Slitrk6	14	110748580	110755149	-	4240	protein_coding	SLIT and NTRK-like family, member 6 [Source:MGI Symbol;Acc:MGI:2443198]	-
ENSMUSG00000006342	0.173969	3.02176	2.89243	3.81428	11.9051	10.0507	Susd2	10	75636706	75644008	-	3435	protein_coding	sushi domain containing 2 [Source:MGI Symbol;Acc:MGI:1918983]	-
ENSMUSG00000034911	3.04743	13.803	6.67718	6.53069	4.43867	3.17163	Ushbp1	8	71384272	71395802	-	6461	protein_coding	USH1 protein network component harmonin binding protein 1 [Source:MGI Symbol;Acc:MGI:1922920]	-
ENSMUSG00000027016	0.834107	0.104826	0.329704	0.318012	0.0820507	0.0173872	Zfp385b	2	77410634	77819639	-	8223	protein_coding	zinc finger protein 385B [Source:MGI Symbol;Acc:MGI:2444734]	-
ENSMUSG00000031980	2.07251	0.0192078	0.463731	0.613488	0.00718307	0.0226824	Agt	8	124556534	124569706	-	1891	protein_coding	angiotensinogen (serpin peptidase inhibitor, clade A, member 8) [Source:MGI Symbol;Acc:MGI:87963]	-
ENSMUSG00000021591	13.5576	4.22855	3.471	3.9977	2.91248	3.83247	Glrx	13	75839868	75850154	+	5494	protein_coding	glutaredoxin [Source:MGI Symbol;Acc:MGI:2135625]	-
ENSMUSG00000020075	18.666	6.34699	7.75673	6.68486	6.23757	4.87751	Ddx21	10	62580251	62602281	-	5177	protein_coding	DEAD (Asp-Glu-Ala-Asp) box polypeptide 21 [Source:MGI Symbol;Acc:MGI:1860494]	-
ENSMUSG00000044719	0	1.73446	2.69337	2.00547	1.47164	1.79023	E230025N22Rik	18	36684923	36695925	-	2016	protein_coding	Riken cDNA E230025N22 gene [Source:MGI Symbol;Acc:MGI:3687212]	-
ENSMUSG00000029661	6.13368	19.8428	16.1622	13.1969	6.08514	5.07903	Col1a2	6	4504814	4541544	+	12426	protein_coding	collagen, type I, alpha 2 [Source:MGI Symbol;Acc:MGI:88468]	-
ENSMUSG00000113776	0.58085	0	0.0411438	0.0533881	0.0124578	0.0218549	Gm19327	12	84184536	84187806	-	3271	TEC	predicted gene, 19327 [Source:MGI Symbol;Acc:MGI:5011512]	-
ENSMUSG00000077483	30.3101	0.210562	16.8452	1.78307	1.06303	1.80928	Gm25273	9	37172880	37172994	-	115	snoRNA	predicted gene, 25273 [Source:MGI Symbol;Acc:MGI:5455050]	-
ENSMUSG00000028001	9.28689	0.0965366	0.0383405	0.0868623	0.0066765	0.261141	Fga	3	83026076	83033627	+	3010	protein_coding	fibrinogen alpha chain [Source:MGI Symbol;Acc:MGI:1316726]	-
ENSMUSG00000017002	112.532	5.83688	13.955	4.67631	6.94078	11.8398	Slpi	2	164354070	164389095	-	1180	protein_coding	secretory leukocyte peptidase inhibitor [Source:MGI Symbol;Acc:MGI:109297]	-
ENSMUSG00000091361	4.80138	0	1.09503	1.10302	0.171011	0.789978	Gm5277	3	78891867	78892422	-	556	processed_pseudogene	predicted gene 5277 [Source:MGI Symbol;Acc:MGI:3646590]	-
ENSMUSG00000042834	17.6502	40.8065	20.4228	26.671	8.83858	4.86834	Nrep	18	33437019	33464029	-	2513	protein_coding	neuronal regeneration related protein [Source:MGI Symbol;Acc:MGI:99444]	-
ENSMUSG00000043411	1.25779	3.70073	4.18154	3.47011	4.17959	4.04857	Usp48	4	137593755	137658537	+	9686	protein_coding	ubiquitin specific peptidase 48 [Source:MGI Symbol;Acc:MGI:2158502]	-
ENSMUSG00000092657	22.9056	0	4.30845	0.231528	0.964621	0	Gm25240	1	53443271	53443395	-	125	miRNA	predicted gene, 25240 [Source:MGI Symbol;Acc:MGI:5455017]	-
ENSMUSG00000097472	1.48772	0.0277531	0.254509	0.299097	0.0616341	0.155637	Gm26586	8	72137389	72140820	-	1745	antisense	predicted gene, 26586 [Source:MGI Symbol;Acc:MGI:5477080]	-
ENSMUSG00000081665	0.77725	0	0.763073	0.133754	0.0830085	0.118983	Gm15922	7	3731630	3739889	-	3462	polymorphic_pseudogene	predicted gene 15922 [Source:MGI Symbol;Acc:MGI:3802148]	-
ENSMUSG00000085773	1.65794	0	0	0.108206	0	0	Gm16233	3	144947561	144954878	+	1623	antisense	predicted gene 16233 [Source:MGI Symbol;Acc:MGI:3802088]	-
ENSMUSG00000107809	0.628775	0.0116613	0.111153	0.0496122	0.00967795	0	Gm44209	6	82318831	82322983	-	4153	TEC	predicted gene, 44209 [Source:MGI Symbol;Acc:MGI:5690601]	-
ENSMUSG00000101958	3.08837	0.44252	0.541735	0.570776	0.0839146	0.292137	Gm19085	1	91487729	91490009	-	2162	processed_pseudogene	predicted gene, 19085 [Source:MGI Symbol;Acc:MGI:5011270]	-
ENSMUSG00000061353	4.85483	13.867	9.98802	13.9093	8.56587	7.92419	Cxcl12	6	117168535	117181367	+	8176	protein_coding	chemokine (C-X-C motif) ligand 12 [Source:MGI Symbol;Acc:MGI:103556]	-
ENSMUSG00000071719	0.00804601	0.552929	0.365784	0.411366	0.456814	0.68887	Tmem28	X	99821021	99848790	+	3909	protein_coding	transmembrane protein 28 [Source:MGI Symbol;Acc:MGI:3648377]	-
ENSMUSG00000106317	9.25279	1.98276	1.07637	2.40135	0.905192	1.08359	Gm43848	3	105725901	105727147	-	1247	lincRNA	predicted gene 43848 [Source:MGI Symbol;Acc:MGI:5663985]	-
ENSMUSG00000019923	20.8535	7.0182	4.60598	8.9132	6.12714	6.62693	Zwint	10	72654845	72674964	+	4434	protein_coding	ZW10 interactor [Source:MGI Symbol;Acc:MGI:1289227]	-
ENSMUSG00000040621	0.050586	1.42227	2.00447	1.14319	2.14658	2.45236	Gemin8	X	166170454	166190512	+	2487	protein_coding	gem nuclear organelle associated protein 8 [Source:MGI Symbol;Acc:MGI:2384300]	-
ENSMUSG00000024359	58.8959	25.3262	25.7941	30.1981	31.777	35.2859	Hspa9	18	34937414	34954357	-	3932	protein_coding	heat shock protein 9 [Source:MGI Symbol;Acc:MGI:96245]	-
ENSMUSG00000035085	0.0599083	2.61478	5.11713	1.05537	0.83307	0.367649	1700020L24Rik	11	83437677	83441233	+	1050	protein_coding	RIKEN cDNA 1700020L24 gene [Source:MGI Symbol;Acc:MGI:1913580]	-
ENSMUSG00000083059	1.76301	0	0	0	0	0	Olfr268-ps1	2	111844262	111851838	-	945	unprocessed_pseudogene	olfactory receptor 268, pseudogene 1 [Source:MGI Symbol;Acc:MGI:3030102]	-
ENSMUSG00000061244	4.89531	2.02961	1.83207	2.44412	1.72364	1.52909	Exoc5	14	49004090	49066653	-	17988	protein_coding	exocyst complex component 5 [Source:MGI Symbol;Acc:MGI:2145645]	-
ENSMUSG00000114555	0.785039	0	0	0.191191	0.0178001	0	Gm48706	13	35798750	35802136	+	3387	TEC	predicted gene, 48706 [Source:MGI Symbol;Acc:MGI:6098347]	-
ENSMUSG00000113255	1.13507	0.0370028	0.13049	0.312742	0.161779	0.0706222	Tes3-ps	13	49493318	49496589	+	3272	protein_coding	testis derived transcript 3, pseudogene [Source:MGI Symbol;Acc:MGI:3582925]	-
ENSMUSG00000044641	17.2461	5.96091	2.171	6.78283	7.9172	7.33744	Pard6b	2	168081004	168101203	+	3399	protein_coding	par-6 family cell polarity regulator beta [Source:MGI Symbol;Acc:MGI:2135605]	-
ENSMUSG00000022938	2.06685	0.0133561	0.51601	0.113646	0.530891	0.180634	Fam3b	16	97470965	97514816	-	1813	protein_coding	family with sequence similarity 3, member B [Source:MGI Symbol;Acc:MGI:1270150]	-
ENSMUSG00000026094	11.5326	4.56722	9.54744	5.50019	5.68097	5.00266	Stk17b	1	53755506	53785224	-	5185	protein_coding	serine/threonine kinase 17b (apoptosis-inducing) [Source:MGI Symbol;Acc:MGI:2138162]	-
ENSMUSG00000103786	0.950812	0	0.0401967	0.0907242	0.0699974	0.0348597	Gm37525	2	3351134	3354004	-	2871	sense_intronic	predicted gene, 37525 [Source:MGI Symbol;Acc:MGI:5610753]	-
ENSMUSG00000015305	19.1473	6.75679	4.09809	7.53835	3.08469	3.47491	Sash1	10	8722219	8886070	-	8568	protein_coding	SAM and SH3 domain containing 1 [Source:MGI Symbol;Acc:MGI:1917347]	-
ENSMUSG00000071177	1.92587	0	0.057926	0	0	0.41461	Serpina1d	12	103763594	103773592	-	1394	protein_coding	serine (or cysteine) peptidase inhibitor, clade A, member 1D [Source:MGI Symbol;Acc:MGI:891968]	-
ENSMUSG00000005225	3.45408	1.10388	1.45266	1.41566	1.10527	0.911871	Plekha8	6	54595111	54645839	+	7005	protein_coding	pleckstrin homology domain containing, family A (phosphoinositide binding specific) member 8 [Source:MGI Symbol;Acc:MGI:2681164]	-
ENSMUSG00000018068	1.40124	0.274473	0.680906	0.521759	0.352364	0.645238	Ints2	11	86210681	86257575	-	10609	protein_coding	integrator complex subunit 2 [Source:MGI Symbol;Acc:MGI:1917672]	-
ENSMUSG00000116788	5.73562	0	0.490042	0.124986	0	0	CT025753.1	16	57768778	57769248	-	471	processed_pseudogene	glyceraldehyde-3-phosphate dehydrogenase, spermatogenic (Gapdhs) pseudogene	-
ENSMUSG00000065141	12.8047	0	0	0.449377	0	4.38431	Gm22652	2	80850288	80850418	+	131	snoRNA	predicted gene, 22652 [Source:MGI Symbol;Acc:MGI:5452429]	-
ENSMUSG00000050896	1.56889	0.0241181	0.160854	0.0781785	0.0761099	0.0949368	Rtn4rl2	2	84871924	84886710	-	1506	protein_coding	reticulon 4 receptor-like 2 [Source:MGI Symbol;Acc:MGI:2669796]	-
ENSMUSG00000023828	0	0.42274	1.08789	0.491214	0.503798	0.296344	Slc22a3	17	12418960	12507704	-	4513	protein_coding	solute carrier family 22 (organic cation transporter), member 3 [Source:MGI Symbol;Acc:MGI:1333817]	-
ENSMUSG00000088688	29.4093	0	0	0	0	0	Gm24000	11	6546147	6546235	-	89	snoRNA	predicted gene, 24000 [Source:MGI Symbol;Acc:MGI:5453777]	-
ENSMUSG00000029061	0.289281	2.99948	4.62234	3.35728	6.77411	4.84093	Mmp23	4	155650655	155653384	-	2340	protein_coding	matrix metallopeptidase 23 [Source:MGI Symbol;Acc:MGI:1347361]	-
ENSMUSG00000066306	2.4596	6.77741	6.96765	5.67765	7.70308	8.53535	Numa1	7	101934111	102014964	+	7919	protein_coding	nuclear mitotic apparatus protein 1 [Source:MGI Symbol;Acc:MGI:2443665]	-
ENSMUSG00000015134	4.02486	0.502908	0.367378	0.363856	0.277981	0.114578	Aldh1a3	7	66390890	66427517	-	4617	protein_coding	aldehyde dehydrogenase family 1, subfamily A3 [Source:MGI Symbol;Acc:MGI:1861722]	-
ENSMUSG00000033191	2.61659	12.4948	4.95631	4.8124	5.10546	3.89631	Tie1	4	118471191	118490061	-	4917	protein_coding	tyrosine kinase with immunoglobulin-like and EGF-like domains 1 [Source:MGI Symbol;Acc:MGI:99906]	-
ENSMUSG00000018830	3.31845	15.1708	27.4752	10.2008	18.1219	17.7921	Myh11	16	14194535	14291372	-	7599	protein_coding	myosin, heavy polypeptide 11, smooth muscle [Source:MGI Symbol;Acc:MGI:102643]	-
ENSMUSG00000074627	0.60719	0.0174961	0.493167	0.150383	0.0546441	0.0413222	Mroh8	2	157208550	157279549	-	4844	protein_coding	maestro heat-like repeat family member 8 [Source:MGI Symbol;Acc:MGI:3603828]	-
ENSMUSG00000023235	0.120037	1.13736	0.721462	0.666471	0.716121	0.552904	Ccl25	8	4325210	4360020	+	7445	protein_coding	chemokine (C-C motif) ligand 25 [Source:MGI Symbol;Acc:MGI:1099448]	-
ENSMUSG00000035342	3.89612	11.3028	7.76946	7.50783	10.8283	10.5327	Lzts2	19	45015176	45027104	+	2921	protein_coding	leucine zipper, putative tumor suppressor 2 [Source:MGI Symbol;Acc:MGI:2385095]	-
ENSMUSG00000114104	1.11627	0	0.039098	0	0.0434608	0.238864	Gm47585	13	63273600	63275911	+	2312	TEC	predicted gene, 47585 [Source:MGI Symbol;Acc:MGI:6096625]	-
ENSMUSG00000109695	3.79719	0.5285	1.80683	1.59813	1.00494	1.25884	Gm31166	19	5512528	5550368	+	1565	transcribed_processed_pseudogene	predicted gene, 31166 [Source:MGI Symbol;Acc:MGI:5590325]	-
ENSMUSG00000081321	1.01477	0	0	0.0922555	0.0308709	0	Gm15304	8	21460958	21463597	+	2640	processed_pseudogene	predicted gene 15304 [Source:MGI Symbol;Acc:MGI:3705536]	-
ENSMUSG00000073491	0.238317	1.90638	1.78671	1.14735	0.978287	0.339933	Ifi213	1	173566283	173599274	-	6840	protein_coding	interferon activated gene 213 [Source:MGI Symbol;Acc:MGI:3695276]	-
ENSMUSG00000073896	0.598509	0	0.344101	0.163492	0	0	Olfr716	7	107138327	107150581	+	4274	protein_coding	olfactory receptor 716 [Source:MGI Symbol;Acc:MGI:3030550]	-
ENSMUSG00000024423	3.13009	8.36753	5.91477	7.95784	10.4058	7.22225	Impact	18	12972252	12992948	+	3432	protein_coding	impact, RWD domain protein [Source:MGI Symbol;Acc:MGI:1098233]	-
ENSMUSG00000031736	1.54224	5.54117	5.62861	3.99093	6.25632	5.16681	Crnde	8	92326033	92356120	-	2017	processed_transcript	colorectal neoplasia differentially expressed (non-protein coding) [Source:MGI Symbol;Acc:MGI:1918546]	-
ENSMUSG00000083789	2.39996	0.138954	1.52752	0.59186	0.0631862	0.337504	Gm6092	X	95209773	95211801	-	2029	processed_pseudogene	predicted gene 6092 [Source:MGI Symbol;Acc:MGI:3643525]	-
ENSMUSG00000005087	30.8207	11.0118	14.2093	9.36162	10.1664	10.4012	Cd44	2	102811141	102901665	-	6776	protein_coding	CD44 antigen [Source:MGI Symbol;Acc:MGI:88338]	-
ENSMUSG00000031681	11.8508	3.97707	3.40482	3.42478	2.97201	4.04392	Smad1	8	79338395	79399518	-	6262	protein_coding	SMAD family member 1 [Source:MGI Symbol;Acc:MGI:109452]	MH1
ENSMUSG00000020241	2.6183	6.73518	4.47266	4.30354	3.57895	4.44814	Col6a2	10	76595762	76623630	-	8326	protein_coding	collagen, type VI, alpha 2 [Source:MGI Symbol;Acc:MGI:88460]	-
ENSMUSG00000021991	0.612785	0.0391872	0.190572	0.188587	0.028594	0.0278735	Cacna2d3	14	28904943	29721864	-	8720	protein_coding	calcium channel, voltage-dependent, alpha2/delta subunit 3 [Source:MGI Symbol;Acc:MGI:1338890]	-
ENSMUSG00000033581	4.06915	1.12599	1.19799	1.43524	1.53063	1.60051	Igf2bp2	16	22059009	22163299	-	7402	protein_coding	insulin-like growth factor 2 mRNA binding protein 2 [Source:MGI Symbol;Acc:MGI:1890358]	-
ENSMUSG00000111980	5.78345	0	0	1.08688	0.183557	0	Gm20304	10	33463905	33464348	+	444	processed_pseudogene	predicted gene, 20304 [Source:MGI Symbol;Acc:MGI:5012489]	-
ENSMUSG00000028214	41.9597	11.6555	6.32514	16.2063	5.5411	3.75168	Gem	4	11704457	11714752	+	2104	protein_coding	GTP binding protein (gene overexpressed in skeletal muscle) [Source:MGI Symbol;Acc:MGI:99844]	-
ENSMUSG00000022300	4.50046	2.10852	2.01824	2.8814	2.2617	2.28584	Dcaf13	15	39112865	39146856	+	10825	protein_coding	DDB1 and CUL4 associated factor 13 [Source:MGI Symbol;Acc:MGI:2684929]	-
ENSMUSG00000094849	7.24324	0.233278	0	1.07144	0	0	Vmn2r-ps18	4	147126130	147126509	+	380	unprocessed_pseudogene	vomeronasal 2, receptor, pseudogene 18 [Source:MGI Symbol;Acc:MGI:3761373]	-
ENSMUSG00000107208	1.94798	0.0273003	0.491363	0.129402	0.0172266	0.0271987	D130004A15Rik	5	69168672	69170248	-	1577	TEC	RIKEN cDNA D130004A15 gene [Source:MGI Symbol;Acc:MGI:2140783]	-
ENSMUSG00000024319	1.36146	5.08763	4.59343	4.31383	5.24427	4.38577	Vps52	17	33955812	33966984	+	3876	protein_coding	VPS52 GARP complex subunit [Source:MGI Symbol;Acc:MGI:1330304]	-
ENSMUSG00000098561	9.99386	0	7.02265	4.66337	0.351541	0	Gtpbp4-ps5	7	15319972	15320260	-	289	unprocessed_pseudogene	GTP binding protein 4, pseudogene 5 [Source:MGI Symbol;Acc:MGI:5520997]	-
ENSMUSG00000040666	0.160264	3.25083	6.91216	5.3942	3.07544	3.23955	Sh3bgr	16	96200450	96228935	+	1570	protein_coding	SH3-binding domain glutamic acid-rich protein [Source:MGI Symbol;Acc:MGI:1354740]	-
ENSMUSG00000023094	2.87933	10.3904	5.60299	11.2967	9.33852	8.02832	Msrb2	2	19371440	19394976	+	1377	protein_coding	methionine sulfoxide reductase B2 [Source:MGI Symbol;Acc:MGI:1923717]	-
ENSMUSG00000040711	4.99225	1.56213	1.55344	1.8921	0.791741	0.862794	Sh3pxd2b	11	32347820	32428173	+	9709	protein_coding	SH3 and PX domains 2B [Source:MGI Symbol;Acc:MGI:2442062]	-
ENSMUSG00000036863	0.662849	2.62236	1.43054	2.79276	2.40277	2.60334	Syde2	3	145987870	146021720	+	5751	protein_coding	synapse defective 1, Rho GTPase, homolog 2 (C. elegans) [Source:MGI Symbol;Acc:MGI:3036264]	-
ENSMUSG00000017493	28.341	70.8046	55.9453	61.771	27.7643	31.1673	Igfbp4	11	99041244	99054392	+	4416	protein_coding	insulin-like growth factor binding protein 4 [Source:MGI Symbol;Acc:MGI:96439]	-
ENSMUSG00000086046	1.68771	0.0113258	0.75565	0.162438	0.126022	0	1700095A21Rik	4	146519039	146546873	-	1069	antisense	RIKEN cDNA 1700095A21 gene [Source:MGI Symbol;Acc:MGI:1914774]	-
ENSMUSG00000029524	0.314106	2.19841	5.48601	2.71889	2.69876	3.31613	Sirt4	5	115478010	115484725	-	2398	protein_coding	sirtuin 4 [Source:MGI Symbol;Acc:MGI:1922637]	-
ENSMUSG00000115636	7.29833	0	0.443438	0	0	0	Gm49120	14	48590599	48596402	+	347	lincRNA	predicted gene, 49120 [Source:MGI Symbol;Acc:MGI:6118522]	-
ENSMUSG00000049583	0.239231	0.00472618	0.00394012	0.0625205	0.00927904	0	Grm5	7	87584168	88134907	+	10247	protein_coding	glutamate receptor, metabotropic 5 [Source:MGI Symbol;Acc:MGI:1351342]	-
ENSMUSG00000114356	2.2559	0	0.231195	1.02978	0	0.410791	Gm47265	X	72229990	72231507	+	1123	unprocessed_pseudogene	predicted gene, 47265 [Source:MGI Symbol;Acc:MGI:6096100]	-
ENSMUSG00000026234	45.3448	19.1806	15.8818	19.13	22.6878	17.7054	Ncl	1	86344719	86359400	-	10188	protein_coding	nucleolin [Source:MGI Symbol;Acc:MGI:97286]	-
ENSMUSG00000004040	21.133	9.51199	9.84526	9.91561	9.29279	11.6159	Stat3	11	100885098	100939540	-	9527	protein_coding	signal transducer and activator of transcription 3 [Source:MGI Symbol;Acc:MGI:103038]	STAT
ENSMUSG00000086948	4.88813	0.0664392	0	0.499654	0	0	Gm14697	X	49332409	49447972	-	648	antisense	predicted gene 14697 [Source:MGI Symbol;Acc:MGI:3705281]	-
ENSMUSG00000079012	11.0763	0	0.00782906	0.363946	0.0670033	0.12476	Serpina3m	12	104338486	104394257	+	1719	protein_coding	serine (or cysteine) peptidase inhibitor, clade A, member 3M [Source:MGI Symbol;Acc:MGI:98378]	-
ENSMUSG00000006585	0	0.581986	1.58709	0.540552	1.05044	0.177674	Cdt1	8	122568015	122573554	+	3140	protein_coding	chromatin licensing and DNA replication factor 1 [Source:MGI Symbol;Acc:MGI:1914427]	-
ENSMUSG00000115432	0.369618	0	0.0645222	0.0630236	0.0136468	0	D130009I18Rik	14	104612791	104966783	+	7363	lincRNA	RIKEN cDNA D130009I18 gene [Source:MGI Symbol;Acc:MGI:2443663]	-
ENSMUSG00000054555	0	0.174125	0.385166	0.283428	0.0879233	0.0338066	Adam12	7	133883199	134232146	-	10573	protein_coding	a disintegrin and metallopeptidase domain 12 (meltrin alpha) [Source:MGI Symbol;Acc:MGI:105378]	-
ENSMUSG00000074272	7.42009	1.61097	1.37242	1.53673	1.01028	1.30454	Ceacam1	7	25461707	25477603	-	5806	protein_coding	carcinoembryonic antigen-related cell adhesion molecule 1 [Source:MGI Symbol;Acc:MGI:1347245]	-
ENSMUSG00000107320	0.36146	0	0.0307439	0.0123962	0.03552	0	Gm42549	6	28219167	28226170	-	7004	TEC	predicted gene 42549 [Source:MGI Symbol;Acc:MGI:5662686]	-
ENSMUSG00000006442	12.7698	3.72037	8.88717	3.24899	4.69817	3.73537	Srm	4	148591503	148594993	+	1599	protein_coding	spermidine synthase [Source:MGI Symbol;Acc:MGI:102690]	-
ENSMUSG00000096982	1.4151	0	0.297071	0.0815699	0	0	Redrum	18	54422295	54452840	+	1774	lincRNA	Redrum, erythroid developmental long intergenic non-protein coding transcript [Source:MGI Symbol;Acc:MGI:1924683]	-
ENSMUSG00000046711	18.1982	4.95323	5.78293	6.88514	8.74902	10.7091	Hmga1	17	27556497	27563674	+	2125	protein_coding	high mobility group AT-hook 1 [Source:MGI Symbol;Acc:MGI:96160]	HMGI/HMGY
ENSMUSG00000030826	2.14446	7.05369	7.44013	5.37684	8.36828	8.51642	Bcat2	7	45570153	45589711	+	3900	protein_coding	branched chain aminotransferase 2, mitochondrial [Source:MGI Symbol;Acc:MGI:1276534]	-
ENSMUSG00000104248	1.11526	0.0362193	0.288076	0	0.011271	0.111504	Gm38152	1	176370155	176373720	-	3566	TEC	predicted gene, 38152 [Source:MGI Symbol;Acc:MGI:5611380]	-
ENSMUSG00000083205	5.8914	0.0921876	2.02204	0.110182	0.208394	0.108864	Gm7821	X	133030204	133030991	-	788	processed_pseudogene	predicted gene 7821 [Source:MGI Symbol;Acc:MGI:3646509]	-
ENSMUSG00000112193	0.796276	0	0	0.294717	0	0	Gm48206	10	105340249	105342314	+	2066	TEC	predicted gene, 48206 [Source:MGI Symbol;Acc:MGI:6097597]	-
ENSMUSG00000023443	2.49044	0.136233	0.550125	0.379076	0.0273717	0.333208	Esx1	X	137115397	137122083	-	1985	protein_coding	extraembryonic, spermatogenesis, homeobox 1 [Source:MGI Symbol;Acc:MGI:1096388]	Homeobox
ENSMUSG00000018776	0	1.23836	1.32377	1.00502	2.19244	1.96872	Slc35g3	11	69759890	69761968	-	1618	protein_coding	solute carrier family 35, member G3 [Source:MGI Symbol;Acc:MGI:1927128]	-
ENSMUSG00000026832	8.96493	3.5769	5.77994	4.4903	4.8017	4.69362	Cytip	2	58129137	58195532	-	6744	protein_coding	cytohesin 1 interacting protein [Source:MGI Symbol;Acc:MGI:2183535]	-
ENSMUSG00000067229	1.3243	0.0311082	0.0484106	0.253748	0	0.0367355	Cyp2c66	19	39113898	39187072	+	1946	protein_coding	cytochrome P450, family 2, subfamily c, polypeptide 66 [Source:MGI Symbol;Acc:MGI:1917138]	-
ENSMUSG00000000766	0.689066	0.0593621	0.197209	0.0829451	0.0125023	0.0247371	Oprm1	10	6758506	7038198	+	8037	protein_coding	opioid receptor, mu 1 [Source:MGI Symbol;Acc:MGI:97441]	-
ENSMUSG00000026090	1.11849	3.52978	5.61135	3.96889	10.7815	10.3159	2010300C02Rik	1	37611677	37720085	-	5075	protein_coding	RIKEN cDNA 2010300C02 gene [Source:MGI Symbol;Acc:MGI:1919347]	-
ENSMUSG00000097672	2.91849	0	0	0.101905	0	0	Gm26609	9	62804478	62808234	+	852	lincRNA	predicted gene, 26609 [Source:MGI Symbol;Acc:MGI:5477103]	-
ENSMUSG00000009995	1.35437	5.05726	4.6214	4.67983	8.04748	6.58597	Taz	X	74281912	74290151	+	5364	protein_coding	tafazzin [Source:MGI Symbol;Acc:MGI:109626]	-
ENSMUSG00000037242	147.651	65.1476	39.4616	60.1769	41.244	40.9338	Clic4	4	135213969	135272814	-	6572	protein_coding	chloride intracellular channel 4 (mitochondrial) [Source:MGI Symbol;Acc:MGI:1352754]	-
ENSMUSG00000084145	0.0268511	1.55167	0.00908107	0.19728	0.100854	0.0876958	Gm12263	11	59474284	59475765	-	1482	processed_pseudogene	predicted gene 12263 [Source:MGI Symbol;Acc:MGI:3650086]	-
ENSMUSG00000101550	4.49107	0	0.185374	0.805425	0.221446	0	Gm29385	9	101435683	101436045	-	363	processed_pseudogene	predicted gene 29385 [Source:MGI Symbol;Acc:MGI:5580091]	-
ENSMUSG00000037032	3.92634	9.29111	5.65648	5.66171	8.40077	6.58417	Apbb1	7	105558483	105581653	-	4408	protein_coding	amyloid beta (A4) precursor protein-binding, family B, member 1 [Source:MGI Symbol;Acc:MGI:107765]	-
ENSMUSG00000032298	0.184912	3.17288	3.28844	1.99496	2.8612	4.66639	Neil1	9	57142800	57148305	-	1871	protein_coding	nei endonuclease VIII-like 1 (E. coli) [Source:MGI Symbol;Acc:MGI:1920024]	-
ENSMUSG00000017204	0.906781	0	0.475196	0.664686	0.0516045	0.0524486	Gsdma	11	98664351	98677708	+	2726	protein_coding	gasdermin A [Source:MGI Symbol;Acc:MGI:1889509]	-
ENSMUSG00000001131	64.8088	17.5055	16.049	8.95042	5.99957	9.34208	Timp1	X	20870166	20874735	+	888	protein_coding	tissue inhibitor of metalloproteinase 1 [Source:MGI Symbol;Acc:MGI:98752]	-
ENSMUSG00000021136	0.0719722	1.36927	0.946873	1.25203	1.10989	0.632556	Smoc1	12	81026808	81186414	+	3496	protein_coding	SPARC related modular calcium binding 1 [Source:MGI Symbol;Acc:MGI:1929878]	-
ENSMUSG00000033597	0	0.29284	0.624552	0.263148	0.117516	0.0648622	Caskin1	17	24488783	24508905	+	6172	protein_coding	CASK interacting protein 1 [Source:MGI Symbol;Acc:MGI:2442952]	-
ENSMUSG00000039385	0.890544	0.135781	0.215282	0.246113	0.139906	0.158504	Cdh6	15	13028701	13173675	-	9024	protein_coding	cadherin 6 [Source:MGI Symbol;Acc:MGI:107435]	-
ENSMUSG00000111825	0.88418	0.0183834	0.293462	0.379223	0.0102276	0.461539	Gm10646	9	67102300	67109601	+	3293	lincRNA	predicted gene 10646 [Source:MGI Symbol;Acc:MGI:3642039]	-
ENSMUSG00000103715	0.0697896	2.29785	1.76174	2.36718	1.18316	0.796759	4933431K14Rik	9	85749078	85750429	+	1352	TEC	RIKEN cDNA 4933431K14 gene [Source:MGI Symbol;Acc:MGI:1918545]	-
ENSMUSG00000060288	6.13592	1.35048	1.7148	0.837622	2.33689	2.20878	Ppih	4	119300010	119320546	-	1894	protein_coding	peptidyl prolyl isomerase H [Source:MGI Symbol;Acc:MGI:106499]	-
ENSMUSG00000055320	9.72684	4.11772	2.55273	4.4997	5.09675	3.88284	Tead1	7	112679318	112906807	+	13570	protein_coding	TEA domain family member 1 [Source:MGI Symbol;Acc:MGI:101876]	TEA
ENSMUSG00000115920	1.8011	0	0.550478	0.401608	0.0148203	0	Gm18283	15	76933705	76935060	-	1356	processed_pseudogene	predicted gene, 18283 [Source:MGI Symbol;Acc:MGI:5010468]	-
ENSMUSG00000093087	28.596	0.448419	0	0	0	5.18165	Mir3473d	8	111016450	111016530	-	81	miRNA	microRNA 3473d [Source:MGI Symbol;Acc:MGI:4950390]	-
ENSMUSG00000079297	3.49111	0.297962	0.414547	0.631499	0.65382	0.471476	Gm2223	X	33505661	33507010	+	1350	processed_pseudogene	predicted pseudogene 2223 [Source:MGI Symbol;Acc:MGI:3780393]	-
ENSMUSG00000028967	56.4301	16.3898	13.3486	16.8272	18.6929	12.411	Errfi1	4	150853919	150868892	+	3582	protein_coding	ERBB receptor feedback inhibitor 1 [Source:MGI Symbol;Acc:MGI:1921405]	-
ENSMUSG00000112254	1.91869	0.144947	0.00913656	0.267922	0.0483181	0.082482	Gm47690	12	75505800	75508745	-	2946	TEC	predicted gene, 47690 [Source:MGI Symbol;Acc:MGI:6096796]	-
ENSMUSG00000074813	6.65507	1.45198	0.579333	0.816604	0.754539	0.483222	Gm14005	2	128178319	128502765	-	4070	lincRNA	predicted gene 14005 [Source:MGI Symbol;Acc:MGI:3652191]	-
ENSMUSG00000001622	0.374521	0	0.1853	0.0354458	0.0854247	0	Csn3	5	87925579	87932665	+	4152	protein_coding	casein kappa [Source:MGI Symbol;Acc:MGI:107461]	-
ENSMUSG00000099960	1.12309	0	0.0418215	0.0548804	0	0	Gm28590	1	122205145	122252180	+	1609	lincRNA	predicted gene 28590 [Source:MGI Symbol;Acc:MGI:5579296]	-
ENSMUSG00000062729	0.852934	4.68711	5.9261	3.57542	8.56406	8.6543	Ppox	1	171275990	171281186	-	4515	protein_coding	protoporphyrinogen oxidase [Source:MGI Symbol;Acc:MGI:104968]	-
ENSMUSG00000030224	45.149	20.3524	25.4001	21.8482	18.8644	17.8779	Strap	6	137735078	137751932	+	3090	protein_coding	serine/threonine kinase receptor associated protein [Source:MGI Symbol;Acc:MGI:1329037]	-
ENSMUSG00000037580	6.5691	1.57617	2.97012	1.87797	2.33391	2.95516	Gch1	14	47153895	47189413	-	6251	protein_coding	GTP cyclohydrolase 1 [Source:MGI Symbol;Acc:MGI:95675]	-
ENSMUSG00000100851	1.82866	0	0.266585	0	0	0	Gm28928	1	124505757	124846039	-	1443	lincRNA	predicted gene 28928 [Source:MGI Symbol;Acc:MGI:5579634]	-
ENSMUSG00000029097	0.0481587	0.684706	1.08323	0.515294	0.532106	0.727514	Trmt44	5	35556203	35575070	-	5154	protein_coding	tRNA methyltransferase 44 [Source:MGI Symbol;Acc:MGI:1926140]	-
ENSMUSG00000050737	18.1674	3.9525	4.14018	3.05002	2.24684	3.32373	Ptges	2	30889471	30929863	-	3931	protein_coding	prostaglandin E synthase [Source:MGI Symbol;Acc:MGI:1927593]	-
ENSMUSG00000025240	2.49374	0.492006	1.65872	1.155	1.31982	1.39586	Sacm1l	9	123529759	123592600	+	3738	protein_coding	SAC1 suppressor of actin mutations 1-like (yeast) [Source:MGI Symbol;Acc:MGI:1933169]	-
ENSMUSG00000105939	1.49369	0	0.0250462	0	0	0.0709552	Gm43322	3	126974256	126975867	-	1612	TEC	predicted gene 43322 [Source:MGI Symbol;Acc:MGI:5663459]	-
ENSMUSG00000024091	66.2504	29.4477	30.7543	33.5605	36.2952	41.338	Vapa	17	65578327	65613555	-	3492	protein_coding	vesicle-associated membrane protein, associated protein A [Source:MGI Symbol;Acc:MGI:1353561]	-
ENSMUSG00000028678	0	0.400491	1.07478	0.286475	0.275716	0.0976893	Kif2c	4	117159639	117182639	-	4363	protein_coding	kinesin family member 2C [Source:MGI Symbol;Acc:MGI:1921054]	-
ENSMUSG00000021506	1.0104	0	0.359849	0.135286	0.0456079	0	Pitx1	13	55825051	55836192	-	2656	protein_coding	paired-like homeodomain transcription factor 1 [Source:MGI Symbol;Acc:MGI:107374]	Homeobox
ENSMUSG00000058126	24.5784	6.51295	5.36343	6.61168	8.45443	4.72201	Tpm3-rs7	14	113314608	113316754	+	2147	protein_coding	tropomyosin 3, related sequence 7 [Source:MGI Symbol;Acc:MGI:99705]	-
ENSMUSG00000038048	0.612305	0	0.0195717	0.639985	0.00511225	0.157088	Cntnap5c	17	57769570	58410355	+	3931	protein_coding	contactin associated protein-like 5C [Source:MGI Symbol;Acc:MGI:3646013]	-
ENSMUSG00000053641	4.89213	1.49869	1.57994	1.72077	1.21551	1.019	Dennd4a	9	64811340	64919667	+	16643	protein_coding	DENN/MADD domain containing 4A [Source:MGI Symbol;Acc:MGI:2142979]	-
ENSMUSG00000020175	0.122242	1.74232	2.84392	2.6371	7.97602	8.2702	Rab36	10	75037058	75054748	+	6175	protein_coding	RAB36, member RAS oncogene family [Source:MGI Symbol;Acc:MGI:1924127]	-
ENSMUSG00000040896	0	0.195142	0.372664	0.142808	0.480698	0.382236	Kcnd3	3	105452330	105674002	+	9587	protein_coding	potassium voltage-gated channel, Shal-related family, member 3 [Source:MGI Symbol;Acc:MGI:1928743]	-
ENSMUSG00000037966	52.608	14.4539	12.2984	9.53525	11.5825	13.7881	Ninj1	13	49187485	49196244	+	1570	protein_coding	ninjurin 1 [Source:MGI Symbol;Acc:MGI:1196617]	-
ENSMUSG00000031538	10.1422	2.53387	2.02218	2.32393	1.58573	2.20253	Plat	8	22757727	22782844	+	6241	protein_coding	plasminogen activator, tissue [Source:MGI Symbol;Acc:MGI:97610]	-
ENSMUSG00000015652	6.77965	0.775801	4.11396	1.976	2.3856	4.06119	Steap1	5	5736317	5749326	-	1377	protein_coding	six transmembrane epithelial antigen of the prostate 1 [Source:MGI Symbol;Acc:MGI:1917608]	-
ENSMUSG00000096415	22.2882	0	0.503108	2.16842	0.380837	1.6516	Gm24722	17	84391429	84391535	+	107	snRNA	predicted gene, 24722 [Source:MGI Symbol;Acc:MGI:5454499]	-
ENSMUSG00000030609	4.47878	1.71801	1.84456	1.62551	2.04698	2.23771	Aen	7	78895854	78911209	+	5801	protein_coding	apoptosis enhancing nuclease [Source:MGI Symbol;Acc:MGI:1915298]	-
ENSMUSG00000102971	1.26576	0	0	0.303047	0.0142232	0	A730062M13Rik	9	72869652	72871561	+	1910	TEC	RIKEN cDNA A730062M13 gene [Source:MGI Symbol;Acc:MGI:3029302]	-
ENSMUSG00000079168	0	0.531356	1.08986	0.838798	0.0896866	0.366906	Cd209g	8	4134098	4137707	+	3610	protein_coding	CD209g antigen [Source:MGI Symbol;Acc:MGI:1917442]	-
ENSMUSG00000044313	3.69393	0.0100615	0.212497	0.136287	0.699602	0.129966	Mab21l3	3	101813076	101848959	-	3610	protein_coding	mab-21-like 3 (C. elegans) [Source:MGI Symbol;Acc:MGI:2446273]	-
ENSMUSG00000032355	0.308648	0.00135793	0.236099	0.134383	0.0828809	0.00160358	Mlip	9	77102081	77352969	-	8916	protein_coding	muscular LMNA-interacting protein [Source:MGI Symbol;Acc:MGI:1916892]	-
ENSMUSG00000038489	62.0529	28.6183	34.1256	34.0492	30.3753	34.5809	Polr2l	7	141471860	141475132	-	1650	protein_coding	polymerase (RNA) II (DNA directed) polypeptide L [Source:MGI Symbol;Acc:MGI:1913741]	-
ENSMUSG00000002007	0	0.634251	2.86191	0.322664	0.852074	0.118119	Srpk3	X	73774405	73778925	+	2784	protein_coding	serine/arginine-rich protein specific kinase 3 [Source:MGI Symbol;Acc:MGI:1891338]	-
ENSMUSG00000021795	337.829	127.989	145.096	98.9154	104.783	80.9166	Sftpd	14	41172214	41185149	-	2417	protein_coding	surfactant associated protein D [Source:MGI Symbol;Acc:MGI:109515]	-
ENSMUSG00000068735	10.5507	3.38872	6.10065	3.40828	4.54977	4.94708	Trp53i11	2	93187548	93201759	+	3690	protein_coding	transformation related protein 53 inducible protein 11 [Source:MGI Symbol;Acc:MGI:2670995]	-
ENSMUSG00000048126	0.731599	3.05446	2.63843	2.03947	1.72258	1.25116	Col6a3	1	90765923	90843971	-	11963	protein_coding	collagen, type VI, alpha 3 [Source:MGI Symbol;Acc:MGI:88461]	-
ENSMUSG00000115277	2.60127	0	0.676487	1.46019	0.11584	0	Gm19016	14	35548132	35549126	-	816	processed_pseudogene	predicted gene, 19016 [Source:MGI Symbol;Acc:MGI:5011201]	-
ENSMUSG00000014243	13.7656	3.07303	6.73871	6.94768	8.58198	3.92307	Zswim7	11	62267224	62281375	-	732	protein_coding	zinc finger SWIM-type containing 7 [Source:MGI Symbol;Acc:MGI:1916997]	-
ENSMUSG00000102123	3.87202	0.257264	0.301464	0.539755	0.096628	0	Gm4319	1	72107155	72122001	-	2048	lincRNA	predicted gene 4319 [Source:MGI Symbol;Acc:MGI:3782500]	-
ENSMUSG00000052825	15.8701	4.12466	4.88094	4.84154	4.95223	7.34652	Gm9892	8	52196065	52197056	-	992	processed_pseudogene	predicted gene 9892 [Source:MGI Symbol;Acc:MGI:3701610]	-
ENSMUSG00000047227	0	1.14912	1.81752	1.03405	1.18867	1.16614	Gm527	12	64917906	64924592	+	1520	protein_coding	predicted gene 527 [Source:MGI Symbol;Acc:MGI:2685373]	-
ENSMUSG00000097471	0.713532	0.0118854	0.112576	0.384573	0.10713	0.00701774	5830432E09Rik	7	135635931	135652314	-	6112	antisense	RIKEN cDNA 5830432E09 gene [Source:MGI Symbol;Acc:MGI:1915015]	-
ENSMUSG00000079659	18.1441	6.49391	4.93644	7.19897	4.98744	4.52789	Tmem243	5	9100668	9160986	+	6841	protein_coding	transmembrane protein 243, mitochondrial [Source:MGI Symbol;Acc:MGI:3606159]	-
ENSMUSG00000094606	0.576938	0	0.00328008	0	0.0066211	0	Vmn2r50	7	10035836	10053296	-	4103	protein_coding	vomeronasal 2, receptor 50 [Source:MGI Symbol;Acc:MGI:3643086]	-
ENSMUSG00000023046	40.9874	98.9827	57.9798	80.2868	102.522	200.827	Igfbp6	15	102144362	102149511	+	1112	protein_coding	insulin-like growth factor binding protein 6 [Source:MGI Symbol;Acc:MGI:96441]	-
ENSMUSG00000080059	0.221492	6.86036	3.00522	6.66012	6.81001	11.5996	Rps19-ps3	4	147821777	147822202	-	426	processed_pseudogene	ribosomal protein S19, pseudogene 3 [Source:MGI Symbol;Acc:MGI:3701125]	-
ENSMUSG00000023505	0.0329224	1.10998	0.768204	0.915794	1.1337	0.139682	Cdca3	6	124829547	124833701	+	2866	protein_coding	cell division cycle associated 3 [Source:MGI Symbol;Acc:MGI:1315198]	-
ENSMUSG00000093105	18.9367	0	0	0	0	0	Gm25535	6	117935469	117935593	-	125	miRNA	predicted gene, 25535 [Source:MGI Symbol;Acc:MGI:5455312]	-
ENSMUSG00000019122	14.5905	3.85473	5.2341	3.78676	2.15918	2.84949	Ccl9	11	83572919	83578636	-	3045	protein_coding	chemokine (C-C motif) ligand 9 [Source:MGI Symbol;Acc:MGI:104533]	-
ENSMUSG00000014418	1.34871	3.42946	3.17289	3.3567	3.58772	3.22238	Hps5	7	46760466	46796064	-	6497	protein_coding	HPS5, biogenesis of lysosomal organelles complex 2 subunit 2 [Source:MGI Symbol;Acc:MGI:2180307]	-
ENSMUSG00000022753	0.608753	0	0.274379	0.295405	0.0238015	0	Tmem30c	16	57266139	57292865	-	3948	protein_coding	transmembrane protein 30C [Source:MGI Symbol;Acc:MGI:1918277]	-
ENSMUSG00000037613	2.21403	0.0611171	0.551918	0.549502	0.4418	0.290968	Tnfrsf23	7	143665809	143685872	-	3962	protein_coding	tumor necrosis factor receptor superfamily, member 23 [Source:MGI Symbol;Acc:MGI:1930269]	-
ENSMUSG00000100813	1.28264	0.0193161	0.272435	0.672575	0.148583	0.258185	Gm28874	4	132265708	132268841	+	3134	lincRNA	predicted gene 28874 [Source:MGI Symbol;Acc:MGI:5579580]	-
ENSMUSG00000039285	13.8734	6.06556	5.83088	8.28982	7.10052	6.77162	Azi2	9	118040499	118069794	+	6439	protein_coding	5-azacytidine induced gene 2 [Source:MGI Symbol;Acc:MGI:1351332]	-
ENSMUSG00000107059	2.10956	0	0.109285	0.123328	0.114183	0	Gm43629	6	22804626	22805329	-	704	processed_pseudogene	predicted gene 43629 [Source:MGI Symbol;Acc:MGI:5663766]	-
ENSMUSG00000048234	10.7685	1.24147	2.05698	1.80714	2.4392	1.65872	Rnf149	1	39551296	39577405	-	2838	protein_coding	ring finger protein 149 [Source:MGI Symbol;Acc:MGI:2677438]	-
ENSMUSG00000107276	1.54794	0.0426313	0.58022	0.4887	0.248319	0.0503432	Gm42858	5	38134394	38136097	-	1704	TEC	predicted gene 42858 [Source:MGI Symbol;Acc:MGI:5662995]	-
ENSMUSG00000108248	2.59136	0	0	0.414811	0	0	Gm34391	6	135171199	135172105	-	907	processed_pseudogene	predicted gene, 34391 [Source:MGI Symbol;Acc:MGI:5593550]	-
ENSMUSG00000052560	9.41473	3.82491	2.37776	3.55692	3.41353	3.33027	Cpne8	15	90487482	90679432	-	4164	protein_coding	copine VIII [Source:MGI Symbol;Acc:MGI:1914121]	-
ENSMUSG00000113418	7.35515	0	0	1.18589	0	0	Gm47172	13	28285569	28309898	+	321	unprocessed_pseudogene	predicted gene, 47172 [Source:MGI Symbol;Acc:MGI:6095953]	-
ENSMUSG00000020044	9.29391	2.87588	1.90539	3.57149	3.80896	2.27648	Timp3	10	86300372	86349506	+	8144	protein_coding	tissue inhibitor of metalloproteinase 3 [Source:MGI Symbol;Acc:MGI:98754]	-
ENSMUSG00000028792	29.2794	11.0383	13.4113	11.1474	11.8737	12.1005	Ak2	4	128991958	129011529	+	2140	protein_coding	adenylate kinase 2 [Source:MGI Symbol;Acc:MGI:87978]	-
ENSMUSG00000090779	3.1833	0	0	0.275629	0.0546837	0	Gm17110	14	34501715	34502684	+	735	antisense	predicted gene 17110 [Source:MGI Symbol;Acc:MGI:4937937]	-
ENSMUSG00000032198	1.62949	6.60262	3.6024	4.10917	2.90443	2.65333	Dock6	9	21799860	21852635	-	8782	protein_coding	dedicator of cytokinesis 6 [Source:MGI Symbol;Acc:MGI:1914789]	-
ENSMUSG00000097657	1.14273	0.0125943	0.00466649	0.500821	0.0819571	0.0129737	Gm7389	8	3994626	3997509	+	2884	processed_pseudogene	predicted gene 7389 [Source:MGI Symbol;Acc:MGI:3645153]	-
ENSMUSG00000114713	4.47908	0.0515448	0.369295	0.517121	0.0651993	0.848263	Gm9633	13	118047320	118047944	+	625	processed_pseudogene	predicted gene 9633 [Source:MGI Symbol;Acc:MGI:3780040]	-
ENSMUSG00000110781	2.14433	0	0.865949	0.0682928	0	0	Gm31992	10	40164110	40169759	+	862	lincRNA	predicted gene, 31992 [Source:MGI Symbol;Acc:MGI:5591151]	-
ENSMUSG00000028669	15.8186	5.87666	7.74291	8.14267	11.1994	9.75341	Pithd1	4	135975460	135987264	-	2477	protein_coding	PITH (C-terminal proteasome-interacting domain of thioredoxin-like) domain containing 1 [Source:MGI Symbol;Acc:MGI:1913443]	-
ENSMUSG00000040940	3.75238	9.31179	20.3557	5.88568	7.7824	7.85366	Arhgef1	7	24902912	24926594	+	7732	protein_coding	Rho guanine nucleotide exchange factor (GEF) 1 [Source:MGI Symbol;Acc:MGI:1353510]	-
ENSMUSG00000102935	1.56062	0.0308466	0.0980083	0.352903	0.00865172	0	Gm38355	12	85100778	85102347	-	1570	TEC	predicted gene, 38355 [Source:MGI Symbol;Acc:MGI:5611583]	-
ENSMUSG00000077356	11.5595	0	0	8.61408	0.514515	0	Gm26288	7	58148096	58148227	-	132	snoRNA	predicted gene, 26288 [Source:MGI Symbol;Acc:MGI:5456065]	-
ENSMUSG00000032501	8.44482	2.77707	3.31183	3.9048	4.08875	3.7097	Trib1	15	59648350	59657099	+	6248	protein_coding	tribbles pseudokinase 1 [Source:MGI Symbol;Acc:MGI:2443397]	-
ENSMUSG00000113584	1.40605	0	0.0241618	0.121237	0	0	Gm46355	12	70909474	70912151	-	1671	lincRNA	predicted gene, 46355 [Source:MGI Symbol;Acc:MGI:5825992]	-
ENSMUSG00000102575	3.18181	0	0	0.110673	0.115275	0	Gm37241	16	77486046	77486568	+	523	TEC	predicted gene, 37241 [Source:MGI Symbol;Acc:MGI:5610469]	-
ENSMUSG00000086633	3.39483	0	0	0	0	0	Gm16081	1	130269950	130281258	-	684	lincRNA	predicted gene 16081 [Source:MGI Symbol;Acc:MGI:3801800]	-
ENSMUSG00000002900	1.45748	3.98663	2.70601	4.7381	3.38133	2.87384	Lamb1	12	31265234	31329644	+	9917	protein_coding	laminin B1 [Source:MGI Symbol;Acc:MGI:96743]	-
ENSMUSG00000107296	5.04565	0	0	1.70607	0.54152	0.566415	Gm43500	5	135122410	135123293	-	312	antisense	predicted gene 43500 [Source:MGI Symbol;Acc:MGI:5663637]	-
ENSMUSG00000037621	2.03011	5.91463	2.47948	3.88303	3.78591	2.82424	Atoh8	6	72206177	72235577	-	2507	protein_coding	atonal bHLH transcription factor 8 [Source:MGI Symbol;Acc:MGI:1918343]	bHLH
ENSMUSG00000076913	43.3414	0	0.441251	0.965055	0.329447	4.70774	Traj16	14	54203134	54203194	+	61	TR_J_gene	T cell receptor alpha joining 16 [Source:MGI Symbol;Acc:MGI:4439580]	-
ENSMUSG00000023068	27.189	10.2824	6.97897	8.95624	9.26159	7.59888	Nus1	10	52417547	52440183	+	4867	protein_coding	NUS1 dehydrodolichyl diphosphate synthase subunit [Source:MGI Symbol;Acc:MGI:1196365]	-
ENSMUSG00000044465	0.292924	1.05403	1.09177	1.0727	1.1907	1.32534	Fam160a2	7	105371211	105400054	-	11834	protein_coding	family with sequence similarity 160, member A2 [Source:MGI Symbol;Acc:MGI:1921599]	-
ENSMUSG00000106951	0	0.430274	0.380051	0.541255	0.657803	0.708573	5930430L01Rik	5	148990056	148995223	-	3994	lincRNA	RIKEN cDNA 5930430L01 gene [Source:MGI Symbol;Acc:MGI:2443110]	-
ENSMUSG00000059179	10.9317	2.6354	3.61393	5.78136	7.23553	4.00396	Gm8991	5	16729996	16731070	-	1075	processed_pseudogene	predicted pseudogene 8991 [Source:MGI Symbol;Acc:MGI:3644227]	-
ENSMUSG00000034958	0.657443	0	0.586563	0.2897	0.0050291	0.0608251	Atcay	10	81204508	81230833	-	3996	protein_coding	ataxia, cerebellar, Cayman type [Source:MGI Symbol;Acc:MGI:2448730]	-
ENSMUSG00000113701	2.86895	0.133255	0.760238	0.230848	0	0	B230303A05Rik	13	15813548	16023423	-	3776	transcribed_processed_pseudogene	RIKEN cDNA B230303A05 gene [Source:MGI Symbol;Acc:MGI:3646895]	-
ENSMUSG00000085069	0	0.523306	0.357544	0.723058	1.27417	0.956638	Gm13111	4	154637576	154644724	+	3542	antisense	predicted gene 13111 [Source:MGI Symbol;Acc:MGI:3651882]	-
ENSMUSG00000115025	3.9182	0	0.431128	2.16909	0.354875	0	Gm4240	14	70302207	70302939	+	571	processed_pseudogene	predicted gene 4240 [Source:MGI Symbol;Acc:MGI:3782417]	-
ENSMUSG00000108108	1.96486	0.00981143	0.249389	0	0.0814273	0	Gm44270	6	146762581	146763814	+	1234	TEC	predicted gene, 44270 [Source:MGI Symbol;Acc:MGI:5690662]	-
ENSMUSG00000085496	1.67814	0	0.114846	0.222221	0.0372909	0.437913	4930517E11Rik	2	124123636	124129956	-	1457	lincRNA	RIKEN cDNA 4930517E11 gene [Source:MGI Symbol;Acc:MGI:1921952]	-
ENSMUSG00000068008	1.26036	0	0.00718534	0.0927101	0	0	Bpifb3	2	153918230	153932996	+	1873	protein_coding	BPI fold containing family B, member 3 [Source:MGI Symbol;Acc:MGI:2675077]	-
ENSMUSG00000093503	1.52808	0	0.378998	0.37699	0	0	Vmn2r-ps4	3	64328660	64332853	+	1015	unprocessed_pseudogene	vomeronasal 2, receptor, pseudogene 4 [Source:MGI Symbol;Acc:MGI:3757669]	-
ENSMUSG00000022822	0.902286	3.51386	3.00931	2.842	3.48071	4.99437	Abcc5	16	20331303	20426394	-	10681	protein_coding	ATP-binding cassette, sub-family C (CFTR/MRP), member 5 [Source:MGI Symbol;Acc:MGI:1351644]	-
ENSMUSG00000056777	4.77101	0	0.0796444	0.422498	0	0	Rpl21-ps13	7	139719399	139719881	+	483	processed_pseudogene	ribosomal protein L21-ps13 [Source:MGI Symbol;Acc:MGI:3649022]	-
ENSMUSG00000053886	15.158	6.62971	7.69544	6.07876	6.9946	8.90348	Sh2d4a	8	68276567	68347699	+	2723	protein_coding	SH2 domain containing 4A [Source:MGI Symbol;Acc:MGI:1919531]	-
ENSMUSG00000072844	3.54773	0.285873	1.13747	0.636676	0.573716	0.0759035	G530011O06Rik	X	169975043	169978917	-	2380	processed_transcript	RIKEN cDNA G530011O06 gene [Source:MGI Symbol;Acc:MGI:3603513]	-
ENSMUSG00000097017	0.470711	0.00620569	0.207031	0.0964206	0.0931327	0.12255	Gm26707	7	25816654	25820654	+	3902	lincRNA	predicted gene, 26707 [Source:MGI Symbol;Acc:MGI:5477201]	-
ENSMUSG00000114457	1.84932	0	0.998724	0.139251	0	0	Gm36346	13	48107617	48237251	-	1247	lincRNA	predicted gene, 36346 [Source:MGI Symbol;Acc:MGI:5595505]	-
ENSMUSG00000035373	17.7068	2.913	1.66762	3.00797	3.04744	2.68738	Ccl7	11	82045712	82047525	+	801	protein_coding	chemokine (C-C motif) ligand 7 [Source:MGI Symbol;Acc:MGI:99512]	-
ENSMUSG00000109722	0.783209	0	0	0	0	0	Gm10578	7	137234683	137242609	+	2914	antisense	predicted gene 10578 [Source:MGI Symbol;Acc:MGI:3642555]	-
ENSMUSG00000106536	0.865999	0.00735559	1.00782	0.14126	0.041092	0	Gm42508	3	97262355	97265646	+	3292	TEC	predicted gene 42508 [Source:MGI Symbol;Acc:MGI:5662645]	-
ENSMUSG00000038467	168.493	62.652	50.0166	55.5381	62.8196	66.346	Chmp4b	2	154651705	154694785	+	2027	protein_coding	charged multivesicular body protein 4B [Source:MGI Symbol;Acc:MGI:1922858]	-
ENSMUSG00000019726	2.1566	0.602389	1.07262	0.77269	1.10479	0.862274	Lyst	13	13590397	13778803	+	17459	protein_coding	lysosomal trafficking regulator [Source:MGI Symbol;Acc:MGI:107448]	-
ENSMUSG00000056494	0.483453	0	0.0735375	0.0990885	0.00577026	0	Cngb3	4	19280850	19510623	+	4708	protein_coding	cyclic nucleotide gated channel beta 3 [Source:MGI Symbol;Acc:MGI:1353562]	-
ENSMUSG00000028962	1.17431	4.04508	3.88759	3.1097	4.99032	5.30727	Slc4a2	5	24423837	24440950	+	8322	protein_coding	solute carrier family 4 (anion exchanger), member 2 [Source:MGI Symbol;Acc:MGI:109351]	-
ENSMUSG00000036854	16.9817	3.93125	7.35387	3.81055	5.01195	3.62016	Hspb6	7	30552178	30555443	+	2299	protein_coding	heat shock protein, alpha-crystallin-related, B6 [Source:MGI Symbol;Acc:MGI:2685325]	-
ENSMUSG00000033538	11.2744	3.15538	3.57207	2.77319	5.07087	5.19414	Casp4	9	5308828	5336783	+	3710	protein_coding	caspase 4, apoptosis-related cysteine peptidase [Source:MGI Symbol;Acc:MGI:107700]	-
ENSMUSG00000097585	1.05985	0.0796121	0.394144	0.344075	0.123319	0.0430935	E230029C05Rik	7	89980723	90049069	+	5972	processed_transcript	RIKEN cDNA E230029C05 gene [Source:MGI Symbol;Acc:MGI:2442580]	-
ENSMUSG00000066487	5.77516	0.847094	3.09028	1.87354	1.74014	1.73901	Gm5786	12	59081019	59081900	+	882	processed_pseudogene	predicted pseudogene 5786 [Source:MGI Symbol;Acc:MGI:3645003]	-
ENSMUSG00000099639	1.05961	0	0.836547	0.292237	0	0	1700084F23Rik	13	70004050	70028348	-	2105	lincRNA	RIKEN cDNA 1700084F23 gene [Source:MGI Symbol;Acc:MGI:1921530]	-
ENSMUSG00000026749	4.86195	1.51705	1.65796	1.27716	0.80577	0.898291	Nek6	2	38511643	38594606	+	10714	protein_coding	NIMA (never in mitosis gene a)-related expressed kinase 6 [Source:MGI Symbol;Acc:MGI:1891638]	-
ENSMUSG00000014599	8.38615	1.89578	1.72245	2.27219	2.13434	5.65155	Csf1	3	107741048	107760469	-	5281	protein_coding	colony stimulating factor 1 (macrophage) [Source:MGI Symbol;Acc:MGI:1339753]	-
ENSMUSG00000027566	44.1627	22.6595	28.7843	23.1877	26.7528	32.2252	Psma7	2	180036374	180042433	-	3071	protein_coding	proteasome (prosome, macropain) subunit, alpha type 7 [Source:MGI Symbol;Acc:MGI:1347070]	-
ENSMUSG00000051166	0.887777	0.180399	0.389134	0.515738	0.474847	1.04591	Eml5	12	98786805	98901484	-	12031	protein_coding	echinoderm microtubule associated protein like 5 [Source:MGI Symbol;Acc:MGI:2442513]	-
ENSMUSG00000114696	1.17137	0	0.224083	0.472293	0	0	Gm47479	13	114118441	114120416	-	1976	TEC	predicted gene, 47479 [Source:MGI Symbol;Acc:MGI:6096452]	-
ENSMUSG00000079278	1.24226	0.00488789	0.681217	0.312966	0	0.0461767	Tmem233	5	116038755	116083244	-	2477	protein_coding	transmembrane protein 233 [Source:MGI Symbol;Acc:MGI:3651514]	-
ENSMUSG00000040435	24.5574	10.2318	8.9175	9.34715	8.74042	9.71563	Ppp1r15a	7	45522916	45526268	-	2937	protein_coding	protein phosphatase 1, regulatory subunit 15A [Source:MGI Symbol;Acc:MGI:1927072]	-
ENSMUSG00000047284	0.955867	3.04413	2.91197	2.81751	3.26793	4.06478	Neurl4	11	69901072	69913820	+	5889	protein_coding	neuralized E3 ubiquitin protein ligase 4 [Source:MGI Symbol;Acc:MGI:1921092]	-
ENSMUSG00000031662	4.92999	1.30467	2.43199	1.11628	0.866742	0.910014	Snx20	8	88626563	88636128	-	6439	protein_coding	sorting nexin 20 [Source:MGI Symbol;Acc:MGI:1918857]	-
ENSMUSG00000005125	13.0956	4.84156	3.61931	4.00997	4.07875	4.64343	Ndrg1	15	66929318	66969640	-	6596	protein_coding	N-myc downstream regulated gene 1 [Source:MGI Symbol;Acc:MGI:1341799]	-
ENSMUSG00000097246	1.14671	0.0304913	0.355267	0.0539106	0.0419978	0.130305	Gm26890	7	19597293	19602294	-	3221	lincRNA	predicted gene, 26890 [Source:MGI Symbol;Acc:MGI:5477384]	-
ENSMUSG00000106026	2.32059	0	0	0	0	0	Gm43131	5	11900483	11916836	-	969	lincRNA	predicted gene 43131 [Source:MGI Symbol;Acc:MGI:5663268]	-
ENSMUSG00000105283	0	3.49555	0.641032	1.25396	0.962107	0.948658	Gm33370	5	96910341	96922175	-	489	lincRNA	predicted gene, 33370 [Source:MGI Symbol;Acc:MGI:5592529]	-
ENSMUSG00000024590	17.2119	4.54127	3.23056	3.07998	3.99442	5.48449	Lmnb1	18	56707813	56753424	+	2962	protein_coding	lamin B1 [Source:MGI Symbol;Acc:MGI:96795]	-
ENSMUSG00000064293	0	0.217157	0.544041	0.165212	0.0295137	0.0381287	Cntn4	6	105677660	106699310	+	8486	protein_coding	contactin 4 [Source:MGI Symbol;Acc:MGI:1095737]	-
ENSMUSG00000044949	7.28964	1.5526	2.96942	3.28951	0.412233	1.18791	Ubtd2	11	32455370	32516687	+	1012	protein_coding	ubiquitin domain containing 2 [Source:MGI Symbol;Acc:MGI:2444752]	-
ENSMUSG00000097566	2.80225	0.378118	0.671755	0.487636	0.0615382	0.367142	A930024N18Rik	17	15375000	15379475	+	3955	lincRNA	RIKEN cDNA A930024N18 gene [Source:MGI Symbol;Acc:MGI:4360907]	-
ENSMUSG00000116597	0.519933	0.00445777	0.386916	0.422809	0.0763474	0.00263208	AC126055.1	16	31617735	31638979	+	5432	lincRNA	novel transcript	-
ENSMUSG00000027175	1.31671	0.302438	0.538581	0.601252	0.408207	0.326463	Tcp11l1	2	104657288	104712169	-	6877	protein_coding	t-complex 11 like 1 [Source:MGI Symbol;Acc:MGI:2444263]	-
ENSMUSG00000080831	11.9207	0.13553	0	0	0	0	Gm12529	4	59532747	59533014	+	268	processed_pseudogene	predicted gene 12529 [Source:MGI Symbol;Acc:MGI:3651544]	-
ENSMUSG00000009580	2.27491	0.0263967	0.335479	0.170412	0	0.274836	Odam	5	87885029	87894174	+	1376	protein_coding	odontogenic, ameloblast asssociated [Source:MGI Symbol;Acc:MGI:1916842]	-
ENSMUSG00000111264	2.89346	0.185097	0.21895	0.231259	0.0736616	0	E030022I16Rik	9	44618253	44621018	+	2766	TEC	RIKEN cDNA E030022I16 gene [Source:MGI Symbol;Acc:MGI:2444690]	-
ENSMUSG00000028698	1.01877	4.44854	1.86256	2.06179	2.43127	1.99074	Pik3r3	4	116221618	116303056	+	5300	protein_coding	phosphoinositide-3-kinase regulatory subunit 3 [Source:MGI Symbol;Acc:MGI:109277]	-
ENSMUSG00000082383	9.65145	1.01098	4.45969	1.68061	0.674002	0.613616	Gm9670	X	103506812	103507589	+	540	processed_pseudogene	predicted gene 9670 [Source:MGI Symbol;Acc:MGI:3780078]	-
ENSMUSG00000036402	42.9548	17.4021	12.2387	18.2659	12.629	12.0475	Gng12	6	66896397	67021350	+	4727	protein_coding	guanine nucleotide binding protein (G protein), gamma 12 [Source:MGI Symbol;Acc:MGI:1336171]	-
ENSMUSG00000071036	5.3884	0.43262	0.848821	0.246123	0.198602	0.999808	Gm10309	17	86497732	86505232	-	2005	protein_coding	predicted gene 10309 [Source:MGI Symbol;Acc:MGI:3641941]	-
ENSMUSG00000026858	0.050331	0.903053	1.22878	1.28631	0.943086	1.41997	Miga2	2	30364233	30385521	+	6249	protein_coding	mitoguardin 2 [Source:MGI Symbol;Acc:MGI:1922035]	-
ENSMUSG00000020644	74.1381	31.1169	26.945	27.8442	23.114	26.3827	Id2	12	25093799	25097140	-	2438	protein_coding	inhibitor of DNA binding 2 [Source:MGI Symbol;Acc:MGI:96397]	bHLH
ENSMUSG00000016458	4.54542	0.437386	0.78627	0.666373	0.258085	1.89153	Wt1	2	105126529	105173616	+	6195	protein_coding	Wilms tumor 1 homolog [Source:MGI Symbol;Acc:MGI:98968]	zf-C2H2
ENSMUSG00000091806	6.87138	0	0.23528	0.442523	0.892233	0.524678	Gm5258	1	86323267	86323593	+	327	processed_pseudogene	predicted gene 5258 [Source:MGI Symbol;Acc:MGI:3647794]	-
ENSMUSG00000043024	2.70755	0.453886	0.445837	0.876567	0.794629	0.895767	Gm16433	6	108563605	108565588	-	1984	processed_pseudogene	predicted gene 16433 [Source:MGI Symbol;Acc:MGI:3645626]	-
ENSMUSG00000019577	9.19798	1.73608	3.60254	1.86591	2.75108	4.07256	Pdk4	6	5483351	5496309	-	3511	protein_coding	pyruvate dehydrogenase kinase, isoenzyme 4 [Source:MGI Symbol;Acc:MGI:1351481]	-
ENSMUSG00000033953	33.6235	14.1348	13.0996	17.9202	16.1863	16.2765	Ppp3r1	11	17159263	17200375	+	3228	protein_coding	protein phosphatase 3, regulatory subunit B, alpha isoform (calcineurin B, type I) [Source:MGI Symbol;Acc:MGI:107172]	-
ENSMUSG00000069920	0	0.708357	1.57541	1.1366	0.749781	0.908301	B3gnt9	8	105252638	105255153	-	2516	protein_coding	UDP-GlcNAc:betaGal beta-1,3-N-acetylglucosaminyltransferase 9 [Source:MGI Symbol;Acc:MGI:2142841]	-
ENSMUSG00000029534	0.0748636	0.689722	1.09884	0.550139	0.458518	0.593619	St7	6	17692933	17943025	+	9042	protein_coding	suppression of tumorigenicity 7 [Source:MGI Symbol;Acc:MGI:1927450]	-
ENSMUSG00000002983	12.7178	4.01551	6.94081	2.59495	2.27692	3.07338	Relb	7	19606217	19629438	-	3885	protein_coding	avian reticuloendotheliosis viral (v-rel) oncogene related B [Source:MGI Symbol;Acc:MGI:103289]	RHD
ENSMUSG00000024050	0.83431	2.03392	2.28006	1.8679	1.43887	1.27769	Wiz	17	32354055	32389401	-	9204	protein_coding	widely-interspaced zinc finger motifs [Source:MGI Symbol;Acc:MGI:1332638]	zf-C2H2
ENSMUSG00000087620	0.495754	0.00559315	0.0473893	0.0133697	0	0.0714342	5330434G04Rik	X	105348282	105391776	-	6494	lincRNA	RIKEN cDNA 5330434G04 gene [Source:MGI Symbol;Acc:MGI:1925519]	-
ENSMUSG00000101925	0	1.80951	2.59801	0.80861	0.148727	0	Gm28156	11	101339660	101347939	-	1136	antisense	predicted gene 28156 [Source:MGI Symbol;Acc:MGI:5578862]	-
ENSMUSG00000057182	0.158212	0.841213	0.266305	0.49312	0.242559	0.216238	Scn3a	2	65457118	65567627	-	12459	protein_coding	sodium channel, voltage-gated, type III, alpha [Source:MGI Symbol;Acc:MGI:98249]	-
ENSMUSG00000031386	1.70657	4.48718	3.91636	3.64852	4.24849	4.9018	Hcfc1	X	73942792	73966357	-	8360	protein_coding	host cell factor C1 [Source:MGI Symbol;Acc:MGI:105942]	-
ENSMUSG00000084342	2.07494	0.0108977	0.74728	0.157629	0.269066	0.516962	Gm11224	4	69954166	69955276	-	1111	processed_pseudogene	predicted gene 11224 [Source:MGI Symbol;Acc:MGI:3651640]	-
ENSMUSG00000041872	1.28353	0.0212921	0.21083	0.0286261	0.0803369	0.0141419	Il17f	1	20777146	20790617	-	2022	protein_coding	interleukin 17F [Source:MGI Symbol;Acc:MGI:2676631]	-
ENSMUSG00000098893	0	2.12137	0.368177	0.512657	0.516448	0.368924	Gm17828	9	72292542	72293340	-	799	processed_pseudogene	predicted gene, 17828 [Source:MGI Symbol;Acc:MGI:5010013]	-
ENSMUSG00000053291	1.36446	0.0430209	0.341158	0.148411	0.213798	0.335745	Rab4b	7	27168424	27178896	-	1970	protein_coding	RAB4B, member RAS oncogene family [Source:MGI Symbol;Acc:MGI:105071]	-
ENSMUSG00000025509	35.7099	13.2476	16.8305	13.6739	18.1765	14.8367	Pnpla2	7	141455198	141460743	+	3020	protein_coding	patatin-like phospholipase domain containing 2 [Source:MGI Symbol;Acc:MGI:1914103]	-
ENSMUSG00000031711	7.88699	3.25902	3.47537	3.25954	3.94041	3.36361	Zfp330	8	82763607	82774160	-	5686	protein_coding	zinc finger protein 330 [Source:MGI Symbol;Acc:MGI:1353574]	-
ENSMUSG00000026082	1.39952	0.253463	0.701056	0.535594	0.588509	0.276023	Rev1	1	38052786	38129801	-	6168	protein_coding	REV1, DNA directed polymerase [Source:MGI Symbol;Acc:MGI:1929074]	-
ENSMUSG00000090602	4.28131	0.358341	1.94347	1.29696	1.28414	0.343778	Gm5611	9	17030045	17030896	+	852	processed_pseudogene	predicted gene 5611 [Source:MGI Symbol;Acc:MGI:3647121]	-
ENSMUSG00000033327	0.306892	1.34401	1.29428	0.751053	1.49812	1.1813	Tnxb	17	34670535	34719815	+	12209	protein_coding	tenascin XB [Source:MGI Symbol;Acc:MGI:1932137]	-
ENSMUSG00000041773	10.9823	3.09468	1.16999	1.88911	1.22742	1.69507	Enc1	13	97241105	97253034	+	4737	protein_coding	ectodermal-neural cortex 1 [Source:MGI Symbol;Acc:MGI:109610]	-
ENSMUSG00000096842	450.481	103.412	174.088	141.217	64.6024	151.162	Gm10736	13	111593534	111593611	-	78	processed_pseudogene	predicted gene 10736 [Source:MGI Symbol;Acc:MGI:3704412]	-
ENSMUSG00000022858	14.209	5.9332	7.61176	7.5959	7.18097	7.6242	Tra2b	16	22244549	22266005	-	9235	protein_coding	transformer 2 beta [Source:MGI Symbol;Acc:MGI:106016]	-
ENSMUSG00000027650	0.726837	2.99635	1.6457	2.17284	1.91633	2.16852	Tti1	2	157981803	158028433	-	4129	protein_coding	TELO2 interacting protein 1 [Source:MGI Symbol;Acc:MGI:1922675]	-
ENSMUSG00000039286	5.07165	2.32179	2.29265	2.1203	1.19272	1.38699	Fndc3b	3	27416162	27711307	-	11485	protein_coding	fibronectin type III domain containing 3B [Source:MGI Symbol;Acc:MGI:1919257]	-
ENSMUSG00000050010	0.112765	1.28292	1.2258	0.833844	0.389008	0.329141	Shisa3	5	67607882	67623552	+	4754	protein_coding	shisa family member 3 [Source:MGI Symbol;Acc:MGI:3041225]	-
ENSMUSG00000108194	2.01138	0.0238646	0.0618969	0.182017	0.0132039	0.261251	1700097M23Rik	6	81893818	81895339	-	1522	TEC	RIKEN cDNA 1700097M23 gene [Source:MGI Symbol;Acc:MGI:1920811]	-
ENSMUSG00000097282	1.22962	0.01464	0.010849	0.30349	0.0273744	0	5031415H12Rik	17	70745329	70755582	-	2481	antisense	RIKEN cDNA 5031415H12 gene [Source:MGI Symbol;Acc:MGI:1923234]	-
ENSMUSG00000029205	1.30914	0.0240065	0.184943	0.41305	0.652367	0.57205	Chrna9	5	65934921	65977326	+	3026	protein_coding	cholinergic receptor, nicotinic, alpha polypeptide 9 [Source:MGI Symbol;Acc:MGI:1202403]	-
ENSMUSG00000051373	0	0.79673	0.375636	0.768614	1.45837	1.73608	Plpp7	2	32095528	32110820	+	2078	protein_coding	phospholipid phosphatase 7 (inactive) [Source:MGI Symbol;Acc:MGI:2445183]	-
ENSMUSG00000111163	0.938341	0.0629947	0.192359	0.177148	0.0698672	0.00225904	Gm46136	9	122935812	122942819	+	6329	transcribed_unprocessed_pseudogene	predicted gene, 46136 [Source:MGI Symbol;Acc:MGI:5825773]	-
ENSMUSG00000115754	0.958244	0	0	0	0	0	Gm48972	14	106241684	106267934	-	2306	lincRNA	predicted gene, 48972 [Source:MGI Symbol;Acc:MGI:6118313]	-
ENSMUSG00000107857	2.93398	0	0	0.0391624	0	0	Gm19596	6	86147152	86148194	+	739	unprocessed_pseudogene	predicted gene, 19596 [Source:MGI Symbol;Acc:MGI:5011781]	-
ENSMUSG00000104159	1.89821	0.0496514	0.248209	0.344551	0.074371	0.285303	Gm38099	17	31532291	31535460	-	3170	TEC	predicted gene, 38099 [Source:MGI Symbol;Acc:MGI:5611327]	-
ENSMUSG00000058057	2.26145	0.0366444	0.122199	0.178173	0.516441	0.328018	Mettl7a3	15	100334929	100340375	+	1652	protein_coding	methyltransferase like 7A3 [Source:MGI Symbol;Acc:MGI:3710670]	-
ENSMUSG00000035673	8.25104	2.59068	3.60444	2.17832	2.11533	2.1149	Sbno2	10	80056992	80105571	-	10715	protein_coding	strawberry notch 2 [Source:MGI Symbol;Acc:MGI:2448490]	-
ENSMUSG00000023999	0.0209156	0.527013	0.904316	0.584402	2.35778	2.62432	Kif6	17	49615136	49909847	+	6015	protein_coding	kinesin family member 6 [Source:MGI Symbol;Acc:MGI:1098238]	-
ENSMUSG00000030530	4.57933	1.2701	2.51127	1.6068	1.2124	1.29963	Furin	7	80388585	80405436	-	9178	protein_coding	furin (paired basic amino acid cleaving enzyme) [Source:MGI Symbol;Acc:MGI:97513]	-
ENSMUSG00000047714	123.602	52.3311	38.9937	51.3691	40.3237	37.1545	Ppp1r2	16	31251537	31275277	-	4440	protein_coding	protein phosphatase 1, regulatory inhibitor subunit 2 [Source:MGI Symbol;Acc:MGI:1914099]	-
ENSMUSG00000028464	11.0103	29.7709	49.9832	19.1493	31.4016	30.8033	Tpm2	4	43514711	43523765	-	2909	protein_coding	tropomyosin 2, beta [Source:MGI Symbol;Acc:MGI:98810]	-
ENSMUSG00000058869	4.59018	0	0	0.180131	0.112724	0	Gm4832	17	88125512	88131113	+	482	transcribed_processed_pseudogene	predicted gene 4832 [Source:MGI Symbol;Acc:MGI:3648524]	-
ENSMUSG00000056222	0.260472	0	0.350401	0.0331177	0.0399016	0.0447394	Spock1	13	57421195	57908332	-	8365	protein_coding	sparc/osteonectin, cwcv and kazal-like domains proteoglycan 1 [Source:MGI Symbol;Acc:MGI:105371]	-
ENSMUSG00000110829	5.76415	0	0.0712071	0.229691	0.265824	0	Gm47638	9	23876783	23877160	+	378	processed_pseudogene	predicted gene, 47638 [Source:MGI Symbol;Acc:MGI:6096712]	-
ENSMUSG00000115829	1.58868	0.00849039	0	0.324724	0.123439	0.110289	Gm48960	15	35368453	35373147	-	1426	antisense	predicted gene, 48960 [Source:MGI Symbol;Acc:MGI:6118292]	-
ENSMUSG00000093897	19.1918	0.576538	0.427243	0.918762	0	0	Gm26268	16	10965724	10965849	+	126	miRNA	predicted gene, 26268 [Source:MGI Symbol;Acc:MGI:5456045]	-
ENSMUSG00000021360	8.84298	3.40679	2.56043	3.35913	2.67695	4.26554	Gcnt2	13	40859754	40960892	+	7051	protein_coding	glucosaminyl (N-acetyl) transferase 2, I-branching enzyme [Source:MGI Symbol;Acc:MGI:1100870]	-
ENSMUSG00000035352	24.0751	2.66455	0.651605	0.761861	4.7586	7.67082	Ccl12	11	82101845	82103400	+	537	protein_coding	chemokine (C-C motif) ligand 12 [Source:MGI Symbol;Acc:MGI:108224]	-
ENSMUSG00000037820	77.9476	37.1775	33.3515	34.9878	32.4693	33.6602	Tgm2	2	158116402	158146436	-	4608	protein_coding	transglutaminase 2, C polypeptide [Source:MGI Symbol;Acc:MGI:98731]	-
ENSMUSG00000027940	151.246	65.479	45.0751	50.8497	57.4222	54.8148	Tpm3	3	90072649	90100902	+	6085	protein_coding	tropomyosin 3, gamma [Source:MGI Symbol;Acc:MGI:1890149]	-
ENSMUSG00000064120	7.59389	2.12064	2.50004	2.23117	3.5353	2.74327	Mocs1	17	49428362	49455435	+	3110	protein_coding	molybdenum cofactor synthesis 1 [Source:MGI Symbol;Acc:MGI:1928904]	-
ENSMUSG00000046607	0.478962	0.025555	0.104329	0.35933	0.372803	0.255433	Hrk	5	118164648	118189478	+	5677	protein_coding	harakiri, BCL2 interacting protein (contains only BH3 domain) [Source:MGI Symbol;Acc:MGI:1201608]	-
ENSMUSG00000020869	26.9293	10.6991	10.5953	10.4391	10.3464	12.6419	Lrrc59	11	94629767	94645216	+	3073	protein_coding	leucine rich repeat containing 59 [Source:MGI Symbol;Acc:MGI:2138133]	-
ENSMUSG00000063888	27.8619	12.4712	12.2552	13.6782	11.818	11.6928	Rpl7l1	17	46773907	46782672	-	3495	protein_coding	ribosomal protein L7-like 1 [Source:MGI Symbol;Acc:MGI:1913479]	-
ENSMUSG00000053830	1.65777	0.0197832	0.0806316	0.61518	0.0551974	0.244914	Gm9923	10	72309321	72311156	+	1836	processed_pseudogene	predicted pseudogene 9923 [Source:MGI Symbol;Acc:MGI:3704365]	-
ENSMUSG00000085227	0.0704672	1.95415	0.969414	0.966623	1.13586	1.44308	6330418K02Rik	5	138264043	138266661	+	1339	antisense	RIKEN cDNA 6330418K02 gene [Source:MGI Symbol;Acc:MGI:3697416]	-
ENSMUSG00000025981	9.59016	3.65878	4.79292	5.43253	6.40206	4.5619	Coq10b	1	55052770	55072702	+	4805	protein_coding	coenzyme Q10B [Source:MGI Symbol;Acc:MGI:1915126]	-
ENSMUSG00000038393	195.259	81.8131	69.3758	106.456	113.366	98.3729	Txnip	3	96557957	96561883	+	3123	protein_coding	thioredoxin interacting protein [Source:MGI Symbol;Acc:MGI:1889549]	-
ENSMUSG00000062270	32.0908	13.4037	10.1586	14.1874	14.1484	12.466	Morf4l1	9	90091665	90114774	-	9754	protein_coding	mortality factor 4 like 1 [Source:MGI Symbol;Acc:MGI:1096551]	-
ENSMUSG00000110737	0	0.234868	0.0587607	0.449313	0.212018	0.143372	4930444F02Rik	10	18796806	18831930	-	6871	lincRNA	RIKEN cDNA 4930444F02 gene [Source:MGI Symbol;Acc:MGI:1921218]	-
ENSMUSG00000060950	4.92458	1.47792	4.16194	1.82081	1.64054	1.91366	Trmt61a	12	111678105	111683902	+	2433	protein_coding	tRNA methyltransferase 61A [Source:MGI Symbol;Acc:MGI:2443487]	-
ENSMUSG00000004473	0.348526	4.15427	2.16571	2.18928	1.27628	0.468706	Clec11a	7	44302687	44306902	-	2978	protein_coding	C-type lectin domain family 11, member a [Source:MGI Symbol;Acc:MGI:1298219]	-
ENSMUSG00000028525	10.7491	2.63661	1.74402	2.27861	1.72091	1.58158	Pde4b	4	102087543	102607259	+	10560	protein_coding	phosphodiesterase 4B, cAMP specific [Source:MGI Symbol;Acc:MGI:99557]	-
ENSMUSG00000031432	19.3371	8.81555	8.95864	12.4534	12.9828	17.2727	Prps1	X	140456613	140476140	+	1993	protein_coding	phosphoribosyl pyrophosphate synthetase 1 [Source:MGI Symbol;Acc:MGI:97775]	-
ENSMUSG00000018899	35.4568	16.7003	17.3149	16.7652	12.8414	14.6473	Irf1	11	53770014	53778374	+	3976	protein_coding	interferon regulatory factor 1 [Source:MGI Symbol;Acc:MGI:96590]	IRF
ENSMUSG00000035395	0.615792	0.00289441	0	0.105196	0	0	Pet2	X	89403848	89409689	-	4183	protein_coding	plasmacytoma expressed transcript 2 [Source:MGI Symbol;Acc:MGI:101758]	-
ENSMUSG00000058728	0	1.55082	0.353829	0.903466	0.239714	0.241647	Cd300c	11	114956116	114969157	-	1065	protein_coding	CD300C molecule [Source:MGI Symbol;Acc:MGI:3032626]	-
ENSMUSG00000115871	0.727862	0	0.00456673	0.10903	0	0	Gm49507	16	3448993	3507196	-	2947	lincRNA	predicted gene, 49507 [Source:MGI Symbol;Acc:MGI:6155196]	-
ENSMUSG00000001025	494.568	263.567	255.507	202.34	186.375	191.024	S100a6	3	90612882	90624181	+	1367	protein_coding	S100 calcium binding protein A6 (calcyclin) [Source:MGI Symbol;Acc:MGI:1339467]	-
ENSMUSG00000032860	4.8733	0.606722	1.00079	0.353313	0.623719	0.112865	P2ry2	7	100996568	101012866	-	3927	protein_coding	purinergic receptor P2Y, G-protein coupled 2 [Source:MGI Symbol;Acc:MGI:105107]	-
ENSMUSG00000026674	4.02394	9.68075	5.29357	8.4483	4.2886	4.10052	Ddr2	1	169972307	170110762	-	9264	protein_coding	discoidin domain receptor family, member 2 [Source:MGI Symbol;Acc:MGI:1345277]	-
ENSMUSG00000074656	17.729	7.00557	8.01786	6.94376	6.82614	5.35008	Eif2s2	2	154871410	154892935	-	6755	protein_coding	eukaryotic translation initiation factor 2, subunit 2 (beta) [Source:MGI Symbol;Acc:MGI:1914454]	-
ENSMUSG00000038843	2.0249	0.414448	1.31969	0.534118	0.572308	1.31597	Gcnt1	19	17326141	17356667	-	5571	protein_coding	glucosaminyl (N-acetyl) transferase 1, core 2 [Source:MGI Symbol;Acc:MGI:95676]	-
ENSMUSG00000085760	8.82617	0.126778	0.931874	2.07096	0.372631	0.486563	Gm14302	2	164459896	164460955	-	382	antisense	predicted gene 14302 [Source:MGI Symbol;Acc:MGI:3701953]	-
ENSMUSG00000061981	28.7674	12.0554	9.55811	12.4953	15.5286	11.2727	Flot2	11	78037931	78060434	+	2740	protein_coding	flotillin 2 [Source:MGI Symbol;Acc:MGI:103309]	-
ENSMUSG00000106681	3.21257	0.0172223	0	0.0411679	0	0	Gm43004	5	65859317	65860019	+	703	TEC	predicted gene 43004 [Source:MGI Symbol;Acc:MGI:5663141]	-
ENSMUSG00000048120	14.8118	4.75715	3.81382	3.78654	2.5269	2.56885	Entpd1	19	40612366	40741602	+	5580	protein_coding	ectonucleoside triphosphate diphosphohydrolase 1 [Source:MGI Symbol;Acc:MGI:102805]	-
ENSMUSG00000097834	0.883152	0	0.240027	0.289675	0	0	Gm26911	6	101198569	101220141	+	2404	antisense	predicted gene, 26911 [Source:MGI Symbol;Acc:MGI:5477405]	-
ENSMUSG00000107606	0.539131	0	0	0.0890666	0	0.022438	Gm43873	6	46045143	46049080	+	3938	TEC	predicted gene, 43873 [Source:MGI Symbol;Acc:MGI:5690265]	-
ENSMUSG00000033777	2.71237	0.310142	0.153218	0.286313	0.378938	0.605239	Tlr13	X	106143204	106160493	+	4304	protein_coding	toll-like receptor 13 [Source:MGI Symbol;Acc:MGI:3045213]	-
ENSMUSG00000025511	13.8218	3.29699	4.5444	3.13702	8.42839	6.54777	Tspan4	7	141475240	141493427	+	2178	protein_coding	tetraspanin 4 [Source:MGI Symbol;Acc:MGI:1928097]	-
ENSMUSG00000021108	8.08928	3.59487	3.06517	3.99651	1.86974	1.49936	Prkch	12	73584796	73778185	+	7530	protein_coding	protein kinase C, eta [Source:MGI Symbol;Acc:MGI:97600]	-
ENSMUSG00000028874	5.2892	1.35868	3.65489	1.51844	0.813819	0.576292	Fgr	4	132974095	133001910	+	3863	protein_coding	FGR proto-oncogene, Src family tyrosine kinase [Source:MGI Symbol;Acc:MGI:95527]	-
ENSMUSG00000028332	0	0.70383	0.220424	0.0230514	0	0	Hemgn	4	46393989	46413506	-	2511	protein_coding	hemogen [Source:MGI Symbol;Acc:MGI:2136910]	-
ENSMUSG00000065373	19.4292	0	0	1.8586	0.872315	0	Gm22740	5	113044144	113044252	+	109	snRNA	predicted gene, 22740 [Source:MGI Symbol;Acc:MGI:5452517]	-
ENSMUSG00000000902	1.68651	5.0137	5.02321	4.83094	4.37215	4.8761	Smarcb1	10	75896769	75921617	-	7930	protein_coding	SWI/SNF related, matrix associated, actin dependent regulator of chromatin, subfamily b, member 1 [Source:MGI Symbol;Acc:MGI:1328366]	-
ENSMUSG00000026958	0.593608	3.9928	3.99965	2.58232	2.81884	3.4837	Dpp7	2	25352276	25356359	-	3337	protein_coding	dipeptidylpeptidase 7 [Source:MGI Symbol;Acc:MGI:1933213]	-
ENSMUSG00000031144	0.0784636	1.13899	1.07921	0.406849	0.652493	0.670311	Syp	X	7638471	7653256	+	5211	protein_coding	synaptophysin [Source:MGI Symbol;Acc:MGI:98467]	-
ENSMUSG00000028399	0.439362	1.17118	0.650998	0.743664	0.557351	0.718382	Ptprd	4	75941238	78211961	-	22822	protein_coding	protein tyrosine phosphatase, receptor type, D [Source:MGI Symbol;Acc:MGI:97812]	-
ENSMUSG00000040451	6.27783	2.26105	2.03436	2.01497	1.9645	2.10167	Sgms1	19	32122727	32389714	-	10299	protein_coding	sphingomyelin synthase 1 [Source:MGI Symbol;Acc:MGI:2444110]	-
ENSMUSG00000027823	7.19589	3.0606	3.14149	3.79783	3.08837	3.19522	Gmps	3	63976106	64022579	+	8105	protein_coding	guanine monophosphate synthetase [Source:MGI Symbol;Acc:MGI:2448526]	-
ENSMUSG00000036905	8.89698	22.4481	23.2444	11.7826	20.2186	20.1514	C1qb	4	136880129	136886187	-	1088	protein_coding	complement component 1, q subcomponent, beta polypeptide [Source:MGI Symbol;Acc:MGI:88224]	-
ENSMUSG00000085560	0.322948	0	0.0158294	0.0380935	0.0579445	0.0978912	C230038L03Rik	7	96906826	96951886	-	4251	processed_transcript	RIKEN cDNA C230038L03 gene [Source:MGI Symbol;Acc:MGI:3697433]	-
ENSMUSG00000077411	16.072	0	0.205468	2.7775	0	0	Gm23749	2	108079912	108080042	-	131	snoRNA	predicted gene, 23749 [Source:MGI Symbol;Acc:MGI:5453526]	-
ENSMUSG00000084417	21.267	0	0	1.46167	0	0	Gm23463	2	157726000	157726098	+	99	snRNA	predicted gene, 23463 [Source:MGI Symbol;Acc:MGI:5453240]	-
ENSMUSG00000041992	13.0145	5.70442	3.1483	6.06079	4.5397	3.53976	Rapgef5	12	117516479	117759737	+	12785	protein_coding	Rap guanine nucleotide exchange factor (GEF) 5 [Source:MGI Symbol;Acc:MGI:2444365]	-
ENSMUSG00000055271	0	1.96295	0	0.290687	0	0.243235	9330161L09Rik	12	103406822	103407820	-	999	protein_coding	RIKEN cDNA 9330161L09 gene [Source:MGI Symbol;Acc:MGI:1924475]	-
ENSMUSG00000087330	3.09295	0	1.34388	0.681968	0.120028	0	Bloodlinc	11	102375549	102377020	-	679	lincRNA	Bloodlinc, erythroid developmental long intergenic non-protein coding transcript [Source:MGI Symbol;Acc:MGI:3650929]	-
ENSMUSG00000047155	0.50158	0	0.0128571	0.062209	0.0194648	0	Cyp4x1	4	115106323	115134281	-	4187	protein_coding	cytochrome P450, family 4, subfamily x, polypeptide 1 [Source:MGI Symbol;Acc:MGI:1932403]	-
ENSMUSG00000032119	1.66597	0.38084	0.959464	1.20575	0.896774	0.579045	Hinfp	9	44292440	44305671	-	8303	protein_coding	histone H4 transcription factor [Source:MGI Symbol;Acc:MGI:2429620]	zf-C2H2
ENSMUSG00000054499	5.54552	1.27709	3.78873	2.39842	3.0228	2.77414	Dedd2	7	25199915	25220615	-	5981	protein_coding	death effector domain-containing DNA binding protein 2 [Source:MGI Symbol;Acc:MGI:1914629]	-
ENSMUSG00000101553	4.45151	0.0716408	4.41984	0.970409	0.0267913	0	1700049E22Rik	6	100527400	100533426	+	507	lincRNA	RIKEN cDNA 1700049E22 gene [Source:MGI Symbol;Acc:MGI:1920645]	-
ENSMUSG00000105909	0.682566	0	0.047616	0.114768	0	0	Gm43189	3	98286988	98290056	+	3069	sense_intronic	predicted gene 43189 [Source:MGI Symbol;Acc:MGI:5663326]	-
ENSMUSG00000070319	47.4926	24.3939	32.8345	24.7711	28.8221	28.8006	Eif3g	9	20894349	20898623	-	1984	protein_coding	eukaryotic translation initiation factor 3, subunit G [Source:MGI Symbol;Acc:MGI:1858258]	-
ENSMUSG00000024053	2.76667	0.767787	1.9355	0.973261	0.468652	0.3125	Emilin2	17	71252172	71311978	-	5505	protein_coding	elastin microfibril interfacer 2 [Source:MGI Symbol;Acc:MGI:2389136]	-
ENSMUSG00000108916	3.25652	0	0	0.270056	0	0	Gm18944	7	108203145	108203787	+	643	processed_pseudogene	predicted gene, 18944 [Source:MGI Symbol;Acc:MGI:5011129]	-
ENSMUSG00000028972	0.773156	0	0.130247	0.448159	0	0.304105	Car6	4	150187015	150201332	-	1816	protein_coding	carbonic anhydrase 6 [Source:MGI Symbol;Acc:MGI:1333786]	-
ENSMUSG00000108298	0.0859389	1.99965	0.726001	0.55714	1.61473	0.615479	Gm44226	6	48754230	48755986	-	1195	lincRNA	predicted gene, 44226 [Source:MGI Symbol;Acc:MGI:5690618]	-
ENSMUSG00000015776	4.4377	10.0184	5.14109	8.7963	6.53218	6.67384	Med22	2	26905262	26910677	-	3614	protein_coding	mediator complex subunit 22 [Source:MGI Symbol;Acc:MGI:98446]	-
ENSMUSG00000091498	85.8748	28.2249	27.6562	38.9695	61.7098	43.2267	Mpc1-ps	12	110858565	110858894	-	330	processed_pseudogene	mitochondrial pyruvate carrier 1, pseudogene [Source:MGI Symbol;Acc:MGI:3781628]	-
ENSMUSG00000065907	10.9909	0	1.00702	1.07874	0	0.449135	Gm26108	X	110622832	110623022	-	191	snRNA	predicted gene, 26108 [Source:MGI Symbol;Acc:MGI:5455885]	-
ENSMUSG00000027848	4.11308	10.8262	8.18927	6.92136	6.5877	5.39385	Olfml3	3	103722222	103738001	-	6161	protein_coding	olfactomedin-like 3 [Source:MGI Symbol;Acc:MGI:1914877]	-
ENSMUSG00000059796	60.3623	28.9011	33.5579	30.7445	34.1429	29.3389	Eif4a1	11	69666936	69672423	-	4334	protein_coding	eukaryotic translation initiation factor 4A1 [Source:MGI Symbol;Acc:MGI:95303]	-
ENSMUSG00000079110	0.0187847	0.518161	0.607649	0.664492	0.524692	0.245757	Capn3	2	120456019	120504913	+	5023	protein_coding	calpain 3 [Source:MGI Symbol;Acc:MGI:107437]	-
ENSMUSG00000084902	0.138507	2.08745	4.6482	3.51378	14.8772	14.5976	Gm281	14	13814618	13914478	-	2952	protein_coding	predicted gene 281 [Source:MGI Symbol;Acc:MGI:2685127]	-
ENSMUSG00000050440	24.9359	0	4.93526	2.33662	0.147046	0.139488	Hamp	7	30942368	30944032	-	410	protein_coding	hepcidin antimicrobial peptide [Source:MGI Symbol;Acc:MGI:1933533]	-
ENSMUSG00000047798	9.76105	0.274274	0.823339	0.281993	0.413836	0.0805257	Cd300lf	11	115116214	115133992	-	5149	protein_coding	CD300 molecule like family member F [Source:MGI Symbol;Acc:MGI:2442359]	-
ENSMUSG00000034035	2.98015	15.5009	30.1558	25.8451	76.3065	72.6942	Ccdc17	4	116596654	116600266	+	2634	protein_coding	coiled-coil domain containing 17 [Source:MGI Symbol;Acc:MGI:1915667]	-
ENSMUSG00000111849	5.45879	0.219283	1.71432	0.618884	0	0	Gm47186	9	44419938	44423391	-	589	lincRNA	predicted gene, 47186 [Source:MGI Symbol;Acc:MGI:6095975]	-
ENSMUSG00000000078	50.3048	23.2046	15.3838	29.58	23.0662	23.3974	Klf6	13	5861482	5870394	+	4391	protein_coding	Kruppel-like factor 6 [Source:MGI Symbol;Acc:MGI:1346318]	zf-C2H2
ENSMUSG00000098689	17.41	0	3.45929	0.689864	0.157002	0	Mir6345	1	93352158	93352285	+	128	miRNA	microRNA 6345 [Source:MGI Symbol;Acc:MGI:5531201]	-
ENSMUSG00000021996	54.7782	21.0346	20.1812	22.1878	22.3973	19.776	Esd	14	74732297	74750765	+	3366	protein_coding	esterase D/formylglutathione hydrolase [Source:MGI Symbol;Acc:MGI:95421]	-
ENSMUSG00000087131	1.88637	0.0326695	0.444563	0.249895	0.0474972	0.0154317	Gm16152	1	38384949	38393974	+	1853	antisense	predicted gene 16152 [Source:MGI Symbol;Acc:MGI:3802058]	-
ENSMUSG00000077171	16.186	0	9.51304	0	0	0	Gm25761	5	20114320	20114447	-	128	snoRNA	predicted gene, 25761 [Source:MGI Symbol;Acc:MGI:5455538]	-
ENSMUSG00000014074	12.9125	6.29711	7.3582	8.27722	4.1788	4.72282	Rnf168	16	32277459	32301434	+	4462	protein_coding	ring finger protein 168 [Source:MGI Symbol;Acc:MGI:1917488]	-
ENSMUSG00000024990	11.3219	26.8041	18.1726	29.1623	30.8202	30.4811	Rbp4	19	38116620	38125321	-	1297	protein_coding	retinol binding protein 4, plasma [Source:MGI Symbol;Acc:MGI:97879]	-
ENSMUSG00000115035	2.342	0	0.0305173	0.131252	0	0	Gm9614	15	3053108	3053989	+	882	processed_pseudogene	predicted gene 9614 [Source:MGI Symbol;Acc:MGI:3780022]	-
ENSMUSG00000116767	2.12821	0	0.570016	0.718376	0.0413929	0	AC173485.1	17	4634978	4637471	+	971	lincRNA	novel transcript	-
ENSMUSG00000022698	37.31	16.3721	13.7944	16.4115	14.9835	12.4589	Naa50	16	44139830	44163366	+	4648	protein_coding	N(alpha)-acetyltransferase 50, NatE catalytic subunit [Source:MGI Symbol;Acc:MGI:1919367]	-
ENSMUSG00000032083	4.88337	0.137138	0.342355	0	0	0.406895	Apoa1	9	46228580	46230466	+	1236	protein_coding	apolipoprotein A-I [Source:MGI Symbol;Acc:MGI:88049]	-
ENSMUSG00000087165	1.50927	8.83337	16.2012	6.77617	10.405	5.39695	2010001A14Rik	11	57795499	57801417	-	714	processed_transcript	RIKEN cDNA 2010001A14 gene [Source:MGI Symbol;Acc:MGI:1923766]	-
ENSMUSG00000053897	27.4084	9.09444	4.22404	5.54321	5.39626	6.32247	Slc39a8	3	135825279	135888572	+	7664	protein_coding	solute carrier family 39 (metal ion transporter), member 8 [Source:MGI Symbol;Acc:MGI:1914797]	-
ENSMUSG00000021771	51.762	26.6228	33.5125	30.1646	31.2524	31.3579	Vdac2	14	21825238	21845879	+	4769	protein_coding	voltage-dependent anion channel 2 [Source:MGI Symbol;Acc:MGI:106915]	-
ENSMUSG00000064347	354.779	91.9357	156.997	139.359	88.3066	50.5511	mt-Ta	MT	5018	5086	-	69	Mt_tRNA	mitochondrially encoded tRNA alanine [Source:MGI Symbol;Acc:MGI:102491]	-
ENSMUSG00000075330	0	1.4903	0.786071	0.800281	1.8539	0.966108	A930003A15Rik	16	19876567	19884274	-	1126	lincRNA	RIKEN cDNA A930003A15 gene [Source:MGI Symbol;Acc:MGI:1915412]	-
ENSMUSG00000067860	0.4428	0	0.0414618	0.068625	0	0	Zic3	X	58022700	58041736	+	4639	protein_coding	zinc finger protein of the cerebellum 3 [Source:MGI Symbol;Acc:MGI:106676]	zf-C2H2
ENSMUSG00000030600	1.05276	0.0494302	0.206092	0.396284	0.080811	0.363739	Lrfn1	7	28451980	28468242	+	3919	protein_coding	leucine rich repeat and fibronectin type III domain containing 1 [Source:MGI Symbol;Acc:MGI:2136810]	-
ENSMUSG00000029229	6.72141	2.47589	2.34878	3.05443	2.204	2.22311	Chic2	5	74997988	75044774	-	9750	protein_coding	cysteine-rich hydrophobic domain 2 [Source:MGI Symbol;Acc:MGI:1921527]	-
ENSMUSG00000027787	4.61473	1.30592	1.86713	1.62747	1.18614	1.15601	Nmd3	3	69721985	69756373	+	10155	protein_coding	NMD3 ribosome export adaptor [Source:MGI Symbol;Acc:MGI:2140103]	-
ENSMUSG00000002274	0	1.1829	0.919993	0.952682	0.798022	0.246473	Metrn	17	25794571	25797136	-	1434	protein_coding	meteorin, glial cell differentiation regulator [Source:MGI Symbol;Acc:MGI:1917333]	-
ENSMUSG00000082969	2.62687	0	0.240324	1.00202	0	0	Gm12630	4	86817794	86818577	-	784	processed_pseudogene	predicted gene 12630 [Source:MGI Symbol;Acc:MGI:3650968]	-
ENSMUSG00000057367	23.549	8.25553	10.8027	9.73851	9.24884	8.0452	Birc2	9	7818227	7837064	-	4580	protein_coding	baculoviral IAP repeat-containing 2 [Source:MGI Symbol;Acc:MGI:1197009]	-
ENSMUSG00000111875	7.28415	0.427758	2.0647	4.87208	1.29117	0.745743	Gm5425	10	84308886	84309344	+	459	processed_pseudogene	predicted gene 5425 [Source:MGI Symbol;Acc:MGI:3643901]	-
ENSMUSG00000088910	21.8596	0	0	1.14308	0.195109	0	Gm22608	11	68908020	68908122	+	103	snRNA	predicted gene, 22608 [Source:MGI Symbol;Acc:MGI:5452385]	-
ENSMUSG00000089210	14.2339	0	1.86998	6.67723	0.377311	0	Gm23386	11	19693155	19693298	-	144	scaRNA	predicted gene, 23386 [Source:MGI Symbol;Acc:MGI:5453163]	-
ENSMUSG00000063684	12.9729	3.84623	4.02506	7.88319	5.4587	6.28426	Gm13910	2	108948806	108950233	+	1428	processed_pseudogene	predicted gene 13910 [Source:MGI Symbol;Acc:MGI:3651143]	-
ENSMUSG00000005682	0.95943	3.41672	3.62583	2.47532	4.02288	3.05556	Pan2	10	128303335	128321358	+	8472	protein_coding	PAN2 poly(A) specific ribonuclease subunit [Source:MGI Symbol;Acc:MGI:1918984]	-
ENSMUSG00000015094	4.34649	10.714	10.7949	9.78497	11.5341	12.7633	Npdc1	2	25399351	25409494	+	3906	protein_coding	neural proliferation, differentiation and control 1 [Source:MGI Symbol;Acc:MGI:1099802]	-
ENSMUSG00000023951	7.89879	37.1681	11.9882	14.7382	25.8469	14.8828	Vegfa	17	46016993	46032369	-	4285	protein_coding	vascular endothelial growth factor A [Source:MGI Symbol;Acc:MGI:103178]	-
ENSMUSG00000103375	1.28666	0	0	0	0	0	Gm37181	1	66690630	66692356	-	1727	TEC	predicted gene, 37181 [Source:MGI Symbol;Acc:MGI:5610409]	-
ENSMUSG00000079434	0.0242871	0.869544	0.694164	0.214403	1.12567	0.694408	Neu2	1	87509889	87597845	+	2590	protein_coding	neuraminidase 2 [Source:MGI Symbol;Acc:MGI:1344417]	-
ENSMUSG00000041674	0.25063	0	0.303628	0.156542	0.028465	0	BC006965	11	112663927	112781976	-	5769	processed_transcript	cDNA sequence BC006965 [Source:MGI Symbol;Acc:MGI:2384955]	-
ENSMUSG00000049988	8.90702	1.30695	1.66699	0.741662	0.403905	0.548136	Lrrc25	8	70616155	70621483	+	2039	protein_coding	leucine rich repeat containing 25 [Source:MGI Symbol;Acc:MGI:2445284]	-
ENSMUSG00000042608	12.0728	5.68315	8.3394	7.48252	8.25228	8.04254	Stk40	4	126103957	126141029	+	4117	protein_coding	serine/threonine kinase 40 [Source:MGI Symbol;Acc:MGI:1921428]	-
ENSMUSG00000001416	22.3655	10.595	10.698	10.4195	10.9802	12.3883	Cct3	3	88297116	88321767	+	6370	protein_coding	chaperonin containing Tcp1, subunit 3 (gamma) [Source:MGI Symbol;Acc:MGI:104708]	-
ENSMUSG00000049649	0.749077	0	0	0	0.0321917	0	Gpr3	4	133209340	133212536	-	2734	protein_coding	G-protein coupled receptor 3 [Source:MGI Symbol;Acc:MGI:101908]	-
ENSMUSG00000046727	62.2918	32.2205	27.5207	28.2526	39.9873	38.0134	Cystm1	18	36345619	36402980	+	2840	protein_coding	cysteine-rich transmembrane module containing 1 [Source:MGI Symbol;Acc:MGI:1913310]	-
ENSMUSG00000106959	0.515089	0	0	0.478409	0.0306579	0	Gm42548	6	28233081	28237013	-	3933	TEC	predicted gene 42548 [Source:MGI Symbol;Acc:MGI:5662685]	-
ENSMUSG00000009687	22.4274	8.9974	13.4176	9.65108	8.10594	7.74795	Fxyd5	7	31032722	31042481	-	4192	protein_coding	FXYD domain-containing ion transport regulator 5 [Source:MGI Symbol;Acc:MGI:1201785]	-
ENSMUSG00000024785	7.96417	1.65952	2.29626	1.2009	1.98389	1.47579	Rcl1	19	29101375	29143843	+	1803	protein_coding	RNA terminal phosphate cyclase-like 1 [Source:MGI Symbol;Acc:MGI:1913275]	-
ENSMUSG00000029397	17.4711	8.04143	10.3848	12.1011	9.95191	11.2613	Rchy1	5	91948904	91963068	-	3773	protein_coding	ring finger and CHY zinc finger domain containing 1 [Source:MGI Symbol;Acc:MGI:1915348]	-
ENSMUSG00000052911	3.00234	9.50086	6.269	6.06114	7.20041	7.10551	Lamb2	9	108479736	108490530	+	6082	protein_coding	laminin, beta 2 [Source:MGI Symbol;Acc:MGI:99916]	-
ENSMUSG00000116599	3.59614	0	0	0.0522401	0	0	AC109255.1	16	84598878	84601206	-	554	processed_pseudogene	transmembrane protein 126A (Tmem126a) pseudogene	-
ENSMUSG00000029552	4.78629	1.63846	2.47441	1.93798	2.72542	2.17599	Tes	6	17065149	17105828	+	6835	protein_coding	testis derived transcript [Source:MGI Symbol;Acc:MGI:105081]	-
ENSMUSG00000041359	1.24125	0.0233348	1.44619	1.06973	0.0220865	0.0852424	Tcl1	12	105216750	105222793	-	1845	protein_coding	T cell lymphoma breakpoint 1 [Source:MGI Symbol;Acc:MGI:1097166]	-
ENSMUSG00000026480	7.49894	2.78617	3.16046	2.48752	2.115	2.55892	Ncf2	1	152800194	152836991	+	8478	protein_coding	neutrophil cytosolic factor 2 [Source:MGI Symbol;Acc:MGI:97284]	-
ENSMUSG00000030302	0.0330808	0.376896	0.370394	0.555335	1.12416	0.628362	Atp2b2	6	113743831	114042613	-	12612	protein_coding	ATPase, Ca++ transporting, plasma membrane 2 [Source:MGI Symbol;Acc:MGI:105368]	-
ENSMUSG00000027832	9.56043	0.123338	0.381271	0.370939	0.0828386	0.297977	Ptx3	3	66219910	66225805	+	2682	protein_coding	pentraxin related gene [Source:MGI Symbol;Acc:MGI:104641]	-
ENSMUSG00000023249	3.1786	7.49028	6.5912	3.88917	5.80812	5.02349	Parp3	9	106470322	106476949	-	3699	protein_coding	poly (ADP-ribose) polymerase family, member 3 [Source:MGI Symbol;Acc:MGI:1891258]	-
ENSMUSG00000028108	6.98627	19.0013	14.4917	9.42926	13.8386	15.6263	Ecm1	3	95734147	95739569	-	2521	protein_coding	extracellular matrix protein 1 [Source:MGI Symbol;Acc:MGI:103060]	-
ENSMUSG00000023074	12.8639	3.41192	3.31167	5.56347	6.14934	4.77394	Mospd1	X	53344598	53370502	-	2085	protein_coding	motile sperm domain containing 1 [Source:MGI Symbol;Acc:MGI:1917630]	-
ENSMUSG00000059022	0	0.294857	0.206084	0.319818	0.95426	1.61345	Kcp	6	29473162	29507952	-	7807	protein_coding	kielin/chordin-like protein [Source:MGI Symbol;Acc:MGI:2141640]	-
ENSMUSG00000114209	5.25471	0.393437	3.0184	0.573385	0.643166	0.598735	Gm48433	14	65326331	65337604	+	701	lincRNA	predicted gene, 48433 [Source:MGI Symbol;Acc:MGI:6097935]	-
ENSMUSG00000032051	29.0007	13.6485	10.4442	15.0566	14.6039	15.9144	Fdx1	9	51943306	51963556	-	3104	protein_coding	ferredoxin 1 [Source:MGI Symbol;Acc:MGI:103224]	-
ENSMUSG00000085912	0.920121	0.0593821	0.696081	0.322206	0.147848	0.0114931	Trp53cor1	17	29057430	29079179	-	3732	lincRNA	tumor protein p53 pathway corepressor 1 [Source:MGI Symbol;Acc:MGI:3801771]	-
ENSMUSG00000052135	0.0601374	1.31966	0.630336	0.74679	1.58817	1.03308	Foxo6	4	120267079	120287349	-	2615	protein_coding	forkhead box O6 [Source:MGI Symbol;Acc:MGI:2676586]	Fork
ENSMUSG00000066772	0.470584	0	0.579157	0.136662	0.0062978	0.020768	Obox3	7	15479825	15639902	-	3191	protein_coding	oocyte specific homeobox 3 [Source:MGI Symbol;Acc:MGI:2149032]	Homeobox
ENSMUSG00000023806	0.902998	5.05906	3.48222	3.28149	8.41121	9.65898	Rsph3b	17	6904413	6948682	-	3114	protein_coding	radial spoke 3B homolog (Chlamydomonas) [Source:MGI Symbol;Acc:MGI:3630308]	-
ENSMUSG00000102250	0.502888	0	0	0.336712	0	0	Gm38260	1	25672245	25676239	-	3995	TEC	predicted gene, 38260 [Source:MGI Symbol;Acc:MGI:5611488]	-
ENSMUSG00000082237	10.4637	0	0	0.301469	0	0	Olfr1172-ps1	2	88264173	88264364	-	192	unprocessed_pseudogene	olfactory receptor 1172, pseudogene 1 [Source:MGI Symbol;Acc:MGI:3031006]	-
ENSMUSG00000068614	13.0057	42.6951	68.3404	38.5702	67.2187	47.1177	Actc1	2	114047282	114053548	-	1618	protein_coding	actin, alpha, cardiac muscle 1 [Source:MGI Symbol;Acc:MGI:87905]	-
ENSMUSG00000041842	1.22955	3.65283	3.01387	4.96732	10.551	12.2527	Fhdc1	3	84442198	84480429	-	6270	protein_coding	FH2 domain containing 1 [Source:MGI Symbol;Acc:MGI:2684972]	-
ENSMUSG00000023914	0.409189	0.00350733	0.0662771	0.117374	0.131767	0	Mep1a	17	43474324	43502812	-	3452	protein_coding	meprin 1 alpha [Source:MGI Symbol;Acc:MGI:96963]	-
ENSMUSG00000070345	0.485732	0	0.889291	0.20881	0.0394936	0.179751	Hsf5	11	87617164	87659542	+	4158	protein_coding	heat shock transcription factor family member 5 [Source:MGI Symbol;Acc:MGI:2685585]	HSF
ENSMUSG00000051062	1.34376	0	0	0.134788	0.0267415	0	Fbll1	11	35797382	35798884	-	1503	protein_coding	fibrillarin-like 1 [Source:MGI Symbol;Acc:MGI:3034689]	-
ENSMUSG00000021224	4.59118	11.4352	6.38732	9.55542	8.27117	8.11388	Numb	12	83794034	83921934	-	3917	protein_coding	NUMB endocytic adaptor protein [Source:MGI Symbol;Acc:MGI:107423]	-
ENSMUSG00000024121	8.25589	2.548	2.18487	2.52739	3.00934	1.97874	Atp6v0c	17	24163866	24169702	-	3384	protein_coding	ATPase, H+ transporting, lysosomal V0 subunit C [Source:MGI Symbol;Acc:MGI:88116]	-
ENSMUSG00000037601	15.5651	7.97656	13.1804	9.54805	7.90037	8.6952	Nme1	11	93956979	93968521	-	3342	protein_coding	NME/NM23 nucleoside diphosphate kinase 1 [Source:MGI Symbol;Acc:MGI:97355]	-
ENSMUSG00000040013	1.09039	0	1.63923	0.759715	0	0	Fkbp6	5	135291704	135350044	-	1753	protein_coding	FK506 binding protein 6 [Source:MGI Symbol;Acc:MGI:2137612]	-
ENSMUSG00000027466	7.87917	16.6848	16.3143	11.2652	11.8214	15.2145	Rbck1	2	152316334	152332653	-	4601	protein_coding	RanBP-type and C3HC4-type zinc finger containing 1 [Source:MGI Symbol;Acc:MGI:1344372]	-
ENSMUSG00000109143	0	4.10429	5.27543	1.87928	0.393643	1.62831	Gm10046	7	27765673	27770972	+	632	transcribed_unprocessed_pseudogene	predicted gene 10046 [Source:MGI Symbol;Acc:MGI:3797981]	-
ENSMUSG00000019139	1.78651	7.29921	8.28699	7.14145	9.83317	12.3646	Isyna1	8	70594373	70597290	+	2436	protein_coding	myo-inositol 1-phosphate synthase A1 [Source:MGI Symbol;Acc:MGI:1919030]	-
ENSMUSG00000071770	0.871568	0	0	0.050376	0	0	Rhox4e	X	37557412	37562283	+	2298	protein_coding	reproductive homeobox 4E [Source:MGI Symbol;Acc:MGI:3613390]	Homeobox
ENSMUSG00000088144	40.0907	1.06742	0	6.68047	0	0	Gm24559	18	74906314	74906434	-	121	snoRNA	predicted gene, 24559 [Source:MGI Symbol;Acc:MGI:5454336]	-
ENSMUSG00000039375	0.477606	0.00552761	0.0260453	0.10382	0.00826857	0.0903797	Wdr17	8	54629055	54887184	-	6571	protein_coding	WD repeat domain 17 [Source:MGI Symbol;Acc:MGI:1924662]	-
ENSMUSG00000105928	0	1.14207	0.0284327	0.846339	0.138113	0.373355	Gm9256	12	115892884	115894303	+	1420	processed_pseudogene	predicted gene 9256 [Source:MGI Symbol;Acc:MGI:3648981]	-
ENSMUSG00000038241	0.568283	1.43424	1.15229	1.01654	1.52951	0.980962	Cep250	2	155956458	155998900	+	10373	protein_coding	centrosomal protein 250 [Source:MGI Symbol;Acc:MGI:108084]	-
ENSMUSG00000020473	2.03561	6.03904	5.92631	5.36422	17.5486	23.1548	Aebp1	11	5861947	5872088	+	4058	protein_coding	AE binding protein 1 [Source:MGI Symbol;Acc:MGI:1197012]	-
ENSMUSG00000053749	0.757823	0.0271084	0.0489661	0.161998	0.097374	0.230953	Gm9920	15	55099917	55113677	-	3573	processed_transcript	predicted gene 9920 [Source:MGI Symbol;Acc:MGI:3642228]	-
ENSMUSG00000028599	9.77459	3.25495	5.51516	2.30386	2.38738	2.0044	Tnfrsf1b	4	145213463	145246870	-	3818	protein_coding	tumor necrosis factor receptor superfamily, member 1b [Source:MGI Symbol;Acc:MGI:1314883]	-
ENSMUSG00000026185	4.70179	11.2048	20.6298	11.5093	34.2218	66.3422	Igfbp5	1	72857932	72874884	-	6006	protein_coding	insulin-like growth factor binding protein 5 [Source:MGI Symbol;Acc:MGI:96440]	-
ENSMUSG00000050732	295.312	136.225	118.442	154.709	167.278	129.49	Vamp8	6	72385223	72390703	-	2311	protein_coding	vesicle-associated membrane protein 8 [Source:MGI Symbol;Acc:MGI:1336882]	-
ENSMUSG00000022119	1.07471	2.55284	2.83176	3.07643	3.13978	3.07728	Rbm26	14	105106751	105177327	-	7649	protein_coding	RNA binding motif protein 26 [Source:MGI Symbol;Acc:MGI:1921463]	-
ENSMUSG00000028932	17.4119	8.9761	11.364	11.5449	9.84877	9.79441	Psmc2	5	21785283	21803787	+	5031	protein_coding	proteasome (prosome, macropain) 26S subunit, ATPase 2 [Source:MGI Symbol;Acc:MGI:109555]	-
ENSMUSG00000018076	2.97115	1.06336	0.75152	1.19056	0.901032	0.745867	Med13l	5	118560679	118765438	+	15427	protein_coding	mediator complex subunit 13-like [Source:MGI Symbol;Acc:MGI:2670178]	-
ENSMUSG00000053094	18.933	7.67057	8.4618	10.3672	11.2405	9.57569	Tmem248	5	130217081	130243765	+	4086	protein_coding	transmembrane protein 248 [Source:MGI Symbol;Acc:MGI:1918917]	-
ENSMUSG00000115084	0.578408	0	0.0752135	0.0670125	0	0	Gm49246	15	36499977	36503431	-	3455	TEC	predicted gene, 49246 [Source:MGI Symbol;Acc:MGI:6118714]	-
ENSMUSG00000015869	3.91181	10.2867	11.5854	11.7922	9.7677	13.1081	Prpsap1	11	116470845	116494202	-	3407	protein_coding	phosphoribosyl pyrophosphate synthetase-associated protein 1 [Source:MGI Symbol;Acc:MGI:1915013]	-
ENSMUSG00000060376	0	0.800494	1.01832	0.493398	1.73415	0.303714	Bckdha	7	25629946	25658981	-	1899	protein_coding	branched chain ketoacid dehydrogenase E1, alpha polypeptide [Source:MGI Symbol;Acc:MGI:107701]	-
ENSMUSG00000029777	30.4787	13.4698	13.9245	16.4066	12.9288	12.3534	Gars	6	55038007	55079500	+	3119	protein_coding	glycyl-tRNA synthetase [Source:MGI Symbol;Acc:MGI:2449057]	-
ENSMUSG00000025237	1.46814	3.30418	2.84903	2.19755	2.40118	2.20132	Parp6	9	59617284	59650285	+	7763	protein_coding	poly (ADP-ribose) polymerase family, member 6 [Source:MGI Symbol;Acc:MGI:1914537]	-
ENSMUSG00000003541	155.472	52.8007	29.8971	46.8562	50.3246	46.4424	Ier3	17	35821684	35822923	+	1131	protein_coding	immediate early response 3 [Source:MGI Symbol;Acc:MGI:104814]	-
ENSMUSG00000083579	6.29123	0	1.53609	1.84927	0.918133	0	Gm15538	16	3926428	3926740	+	313	processed_pseudogene	predicted gene 15538 [Source:MGI Symbol;Acc:MGI:3782986]	-
ENSMUSG00000114617	0.451252	0	0.0400472	0.1861	0	0.0470106	Gm48766	13	36252359	36256920	+	4562	TEC	predicted gene, 48766 [Source:MGI Symbol;Acc:MGI:6098453]	-
ENSMUSG00000106807	2.30363	0.199864	2.05103	0.679811	0.109285	0.10002	Gm10441	5	53519260	53522731	-	1546	antisense	predicted gene 10441 [Source:MGI Symbol;Acc:MGI:3641801]	-
ENSMUSG00000066621	1.76403	5.00137	4.70053	3.41957	3.00574	2.99447	Tecpr1	5	144194442	144223615	-	12772	protein_coding	tectonin beta-propeller repeat containing 1 [Source:MGI Symbol;Acc:MGI:1917631]	-
ENSMUSG00000027236	9.05782	4.33503	6.20298	5.62225	4.90982	4.58183	Eif3j1	2	122028546	122056598	+	5830	protein_coding	eukaryotic translation initiation factor 3, subunit J1 [Source:MGI Symbol;Acc:MGI:1925905]	-
ENSMUSG00000029596	0	1.07049	0.858232	0.310311	0.992816	0.368908	Sdsl	5	120458186	120472810	-	1497	protein_coding	serine dehydratase-like [Source:MGI Symbol;Acc:MGI:2182607]	-
ENSMUSG00000081455	3.29639	0	1.46532	0.185121	0.127267	0.104199	Hmgb1-ps3	11	63846183	63846818	-	636	processed_pseudogene	high mobility group box 1, pseudogene 3 [Source:MGI Symbol;Acc:MGI:3768539]	-
ENSMUSG00000049892	8.65959	1.69579	1.51617	1.66071	2.82269	3.54531	Rasd1	11	59963181	59964944	-	1611	protein_coding	RAS, dexamethasone-induced 1 [Source:MGI Symbol;Acc:MGI:1270848]	-
ENSMUSG00000108368	1.46064	0.0290692	0.0615738	0.0700783	0.00804172	0.160196	Gm45053	6	72603004	72605502	-	2499	TEC	predicted gene 45053 [Source:MGI Symbol;Acc:MGI:5753629]	-
ENSMUSG00000116066	2.27486	0	0.0640102	0.384305	0.0885006	0	Gm49477	15	103135881	103140669	+	841	lincRNA	predicted gene, 49477 [Source:MGI Symbol;Acc:MGI:6155147]	-
ENSMUSG00000041308	6.96596	2.31654	2.08043	2.21301	2.18874	1.54186	Sntb2	8	106935750	107019714	+	10350	protein_coding	syntrophin, basic 2 [Source:MGI Symbol;Acc:MGI:101771]	-
ENSMUSG00000022537	1.0781	3.67693	1.99027	1.80425	2.01536	2.20594	Tmem44	16	30511855	30550842	-	8893	protein_coding	transmembrane protein 44 [Source:MGI Symbol;Acc:MGI:1924489]	-
ENSMUSG00000026885	0.0312643	0.742269	0.700309	0.6249	1.0253	0.602309	Ttll11	2	35751241	35979913	-	4024	protein_coding	tubulin tyrosine ligase-like family, member 11 [Source:MGI Symbol;Acc:MGI:1921660]	-
ENSMUSG00000030041	3.91796	0.491098	0.813212	0.75141	1.2306	0.30376	M1ap	6	82946902	83030309	+	2212	protein_coding	meiosis 1 associated protein [Source:MGI Symbol;Acc:MGI:1315200]	-
ENSMUSG00000038181	0	0.403317	0.527802	0.400649	0.828387	0.853093	Chpf2	5	24586741	24594556	+	5588	protein_coding	chondroitin polymerizing factor 2 [Source:MGI Symbol;Acc:MGI:1917522]	-
ENSMUSG00000053146	0.677218	0	0.115278	0.154349	0.0122114	0	Olfr352	2	36868460	36872785	+	3337	protein_coding	olfactory receptor 352 [Source:MGI Symbol;Acc:MGI:3030186]	-
ENSMUSG00000024935	4.53454	1.31205	1.17735	0.922156	1.53562	1.21056	Slc1a1	19	28835049	28913960	+	6170	protein_coding	solute carrier family 1 (neuronal/epithelial high affinity glutamate transporter, system Xag), member 1 [Source:MGI Symbol;Acc:MGI:105083]	-
ENSMUSG00000058207	6.52269	0.0353154	0	0	0	0	Serpina3k	12	104338486	104346144	+	2057	protein_coding	serine (or cysteine) peptidase inhibitor, clade A, member 3K [Source:MGI Symbol;Acc:MGI:98377]	-
ENSMUSG00000022220	2.07555	8.45161	4.52252	4.63361	2.48125	2.60657	Adcy4	14	55769057	55784095	-	4672	protein_coding	adenylate cyclase 4 [Source:MGI Symbol;Acc:MGI:99674]	-
ENSMUSG00000104291	20.3453	7.89303	10.7206	9.15757	6.84121	9.97212	A130071D04Rik	1	138161820	138167683	-	5864	TEC	RIKEN cDNA A130071D04 gene [Source:MGI Symbol;Acc:MGI:2444749]	-
ENSMUSG00000075225	0.168111	1.11559	3.161	2.56755	6.3552	6.80724	Ccdc162	10	41538846	41716634	-	10197	protein_coding	coiled-coil domain containing 162 [Source:MGI Symbol;Acc:MGI:1923223]	-
ENSMUSG00000054364	88.1909	35.4801	27.2612	37.8086	25.1502	29.9928	Rhob	12	8497661	8500009	-	2349	protein_coding	ras homolog family member B [Source:MGI Symbol;Acc:MGI:107949]	-
ENSMUSG00000071379	51.0823	26.6194	22.496	34.0748	21.9133	21.991	Hpcal1	12	17690856	17791933	+	1695	protein_coding	hippocalcin-like 1 [Source:MGI Symbol;Acc:MGI:1855689]	-
ENSMUSG00000022676	1.12656	3.9499	1.72883	3.27452	2.52534	1.65779	Snai2	16	14705852	14709385	+	2021	protein_coding	snail family zinc finger 2 [Source:MGI Symbol;Acc:MGI:1096393]	zf-C2H2
ENSMUSG00000022584	6.70089	1.43937	2.95714	0.651507	1.24759	0.600874	Ly6c2	15	75108158	75111970	-	2740	protein_coding	lymphocyte antigen 6 complex, locus C2 [Source:MGI Symbol;Acc:MGI:3712069]	-
ENSMUSG00000071510	1.05736	0	0.781989	0.511602	0	0.0843137	Olfr172	16	58759544	58763176	-	1834	protein_coding	olfactory receptor 172 [Source:MGI Symbol;Acc:MGI:3030006]	-
ENSMUSG00000090500	2.32762	0	0.631355	0.195878	0	0	Gm17057	15	99819020	99834570	+	591	antisense	predicted gene 17057 [Source:MGI Symbol;Acc:MGI:4937884]	-
ENSMUSG00000089760	0	1.58533	0.908802	3.29409	0.103821	0	D030046N08Rik	18	84719004	84720775	-	1570	processed_transcript	RIKEN cDNA D030046N08 gene [Source:MGI Symbol;Acc:MGI:3645234]	-
ENSMUSG00000002885	8.15655	27.9781	12.5732	14.0074	14.4881	12.949	Adgre5	8	83723251	83741326	-	3757	protein_coding	adhesion G protein-coupled receptor E5 [Source:MGI Symbol;Acc:MGI:1347095]	-
ENSMUSG00000026254	6.84234	2.9497	3.3512	2.89905	3.39181	3.25593	Eif4e2	1	87213914	87240488	+	7497	protein_coding	eukaryotic translation initiation factor 4E member 2 [Source:MGI Symbol;Acc:MGI:1914440]	-
ENSMUSG00000112020	2.49089	0	0	0	0.141683	0	Gm48532	12	5235156	5235964	-	809	TEC	predicted gene, 48532 [Source:MGI Symbol;Acc:MGI:6098073]	-
ENSMUSG00000109893	2.19693	0.0282881	0.07337	0.467469	0	0.550534	Gm9655	8	82747616	82757987	+	1284	processed_pseudogene	predicted gene 9655 [Source:MGI Symbol;Acc:MGI:3780063]	-
ENSMUSG00000047881	13.55	5.02992	3.77735	4.88632	4.01459	2.75837	Rell1	5	63908897	63968897	-	3856	protein_coding	RELT-like 1 [Source:MGI Symbol;Acc:MGI:2140767]	-
ENSMUSG00000049086	0.671911	8.41304	6.48868	6.14101	5.21287	8.26797	Bmyc	2	25706739	25707721	+	983	protein_coding	brain expressed myelocytomatosis oncogene [Source:MGI Symbol;Acc:MGI:88184]	-
ENSMUSG00000111343	5.29682	0.319307	0.268017	0.813644	0.0889241	0.266692	Gm47175	9	56504825	56506661	-	1837	TEC	predicted gene, 47175 [Source:MGI Symbol;Acc:MGI:6095958]	-
ENSMUSG00000112964	0	0.316095	0.192651	0.284312	0.37922	0.308991	E430024I08Rik	13	74434781	74463429	-	4631	lincRNA	RIKEN cDNA E430024I08 gene [Source:MGI Symbol;Acc:MGI:3649010]	-
ENSMUSG00000095596	15.4887	0	10.2746	7.15358	0	0	Gm24303	6	29150554	29150679	-	126	miRNA	predicted gene, 24303 [Source:MGI Symbol;Acc:MGI:5454080]	-
ENSMUSG00000117258	6.76874	0	3.51419	1.19439	0	0	AC154766.3	17	23642237	23643144	+	315	processed_pseudogene	mitochondrial ribosomal protein L36 (Mrpl36) pseudogene	-
ENSMUSG00000022111	7.20172	1.82928	3.00056	2.31041	1.5411	1.92238	Uchl3	14	101653967	101696125	+	3831	protein_coding	ubiquitin carboxyl-terminal esterase L3 (ubiquitin thiolesterase) [Source:MGI Symbol;Acc:MGI:1355274]	-
ENSMUSG00000113299	2.13953	0.0150776	0	0.0360411	0	0	Gm35618	13	69680589	69697676	-	1606	lincRNA	predicted gene, 35618 [Source:MGI Symbol;Acc:MGI:5594777]	-
ENSMUSG00000029212	0.62157	0.0908823	0.219133	0.0504435	0.0353225	0.0399829	Gabrb1	5	71658113	72149037	+	13838	protein_coding	gamma-aminobutyric acid (GABA) A receptor, subunit beta 1 [Source:MGI Symbol;Acc:MGI:95619]	-
ENSMUSG00000032368	0.537213	0.0340047	0.0260038	0.0926312	0.00477189	0	Zic1	9	91358058	91365810	-	5693	protein_coding	zinc finger protein of the cerebellum 1 [Source:MGI Symbol;Acc:MGI:106683]	zf-C2H2
ENSMUSG00000013584	0.493482	4.10784	6.95968	3.83672	6.51995	30.6248	Aldh1a2	9	71215789	71296243	+	2264	protein_coding	aldehyde dehydrogenase family 1, subfamily A2 [Source:MGI Symbol;Acc:MGI:107928]	-
ENSMUSG00000022094	2.36722	0.491594	0.781357	0.357362	0.413462	0.585413	Slc39a14	14	70303469	70351425	-	10550	protein_coding	solute carrier family 39 (zinc transporter), member 14 [Source:MGI Symbol;Acc:MGI:2384851]	-
ENSMUSG00000036112	18.4147	9.12768	11.1256	10.0248	11.0891	9.94579	Metap2	10	93858489	93897093	-	7654	protein_coding	methionine aminopeptidase 2 [Source:MGI Symbol;Acc:MGI:1929701]	-
ENSMUSG00000095298	6.92913	0	5.50131	2.08591	6.05567	0.044128	Gm12407	4	41791989	41793601	-	324	unprocessed_pseudogene	predicted gene 12407 [Source:MGI Symbol;Acc:MGI:3693096]	-
ENSMUSG00000055775	0.164353	0	1.18534	0.0437265	0.00170712	0.00850173	Myh8	11	67277124	67308634	+	11772	protein_coding	myosin, heavy polypeptide 8, skeletal muscle, perinatal [Source:MGI Symbol;Acc:MGI:1339712]	-
ENSMUSG00000038175	18.821	7.78328	6.10148	7.4673	7.6533	5.61255	Mylip	13	45389742	45412022	+	3233	protein_coding	myosin regulatory light chain interacting protein [Source:MGI Symbol;Acc:MGI:2388271]	-
ENSMUSG00000103751	3.8192	0.219237	1.15053	0.489087	0.012792	0.0637061	Gm37283	1	130473743	130475313	+	1571	TEC	predicted gene, 37283 [Source:MGI Symbol;Acc:MGI:5610511]	-
ENSMUSG00000014867	36.3528	18.0453	21.2892	16.5625	21.328	25.3643	Surf4	2	26920040	26933928	-	3281	protein_coding	surfeit gene 4 [Source:MGI Symbol;Acc:MGI:98445]	-
ENSMUSG00000032902	6.27634	2.33656	3.82832	1.34176	4.08018	7.61323	Slc16a1	3	104638668	104658462	+	4426	protein_coding	solute carrier family 16 (monocarboxylic acid transporters), member 1 [Source:MGI Symbol;Acc:MGI:106013]	-
ENSMUSG00000029447	48.2072	24.3593	21.2077	23.564	19.6707	22.8859	Cct6a	5	129786998	129846371	+	3620	processed_transcript	chaperonin containing Tcp1, subunit 6a (zeta) [Source:MGI Symbol;Acc:MGI:107943]	-
ENSMUSG00000000001	45.1341	21.8902	17.6245	20.1148	18.2693	19.0475	Gnai3	3	108107280	108146146	-	3262	protein_coding	guanine nucleotide binding protein (G protein), alpha inhibiting 3 [Source:MGI Symbol;Acc:MGI:95773]	-
ENSMUSG00000020593	2.20248	0.904838	1.71292	1.40384	2.02972	1.45335	Lpin1	12	16535669	16610966	-	9665	protein_coding	lipin 1 [Source:MGI Symbol;Acc:MGI:1891340]	-
ENSMUSG00000026774	1.12129	0.0241663	0.200049	0.346599	0.0471683	0	4931423N10Rik	2	23207476	23267129	+	2004	protein_coding	RIKEN cDNA 4931423N10 gene [Source:MGI Symbol;Acc:MGI:1918231]	-
ENSMUSG00000038240	1.47703	0.279606	0.582677	1.17839	0.742513	1.12349	Pdss2	10	43221486	43464882	+	5963	protein_coding	prenyl (solanesyl) diphosphate synthase, subunit 2 [Source:MGI Symbol;Acc:MGI:1918615]	-
ENSMUSG00000024604	9.40515	3.43443	4.95581	3.99687	3.95225	3.336	Rbm22	18	60560736	60572810	+	5338	protein_coding	RNA binding motif protein 22 [Source:MGI Symbol;Acc:MGI:1914060]	-
ENSMUSG00000085939	30.7978	9.50662	13.4561	9.95408	14.5542	9.60994	Cd63-ps	18	50134726	50135600	+	875	transcribed_processed_pseudogene	CD63 antigen, pseudogene [Source:MGI Symbol;Acc:MGI:105972]	-
ENSMUSG00000109619	2.49734	0	0	0	0	0	Gm45672	7	133319985	133333201	-	768	lincRNA	predicted gene 45672 [Source:MGI Symbol;Acc:MGI:5791508]	-
ENSMUSG00000007682	13.9363	2.45469	0.838744	1.47224	0.0996334	0.159352	Dio2	12	90724552	90738438	-	5815	protein_coding	deiodinase, iodothyronine, type II [Source:MGI Symbol;Acc:MGI:1338833]	-
ENSMUSG00000040747	29.5378	7.8789	18.916	6.28248	8.93814	4.78245	Cd53	3	106759921	106790149	-	1742	protein_coding	CD53 antigen [Source:MGI Symbol;Acc:MGI:88341]	-
ENSMUSG00000044442	2.73593	0.998178	1.64946	1.42702	1.28575	1.81458	N6amt1	16	87354185	87368742	+	6135	protein_coding	N-6 adenine-specific DNA methyltransferase 1 (putative) [Source:MGI Symbol;Acc:MGI:1915018]	-
ENSMUSG00000057280	0.506525	0	0.45132	0.15355	0.0266105	0.0643517	Musk	4	58285960	58374303	+	3776	protein_coding	muscle, skeletal, receptor tyrosine kinase [Source:MGI Symbol;Acc:MGI:103581]	-
ENSMUSG00000022037	73.7479	24.7358	56.5322	26.2884	33.787	51.7093	Clu	14	65968483	65981547	+	3437	protein_coding	clusterin [Source:MGI Symbol;Acc:MGI:88423]	-
ENSMUSG00000117175	0.578945	0	0	0.17181	0.174276	0	AC161258.2	17	51882727	51965257	+	3293	lincRNA	novel transcript	-
ENSMUSG00000041936	1.30149	5.48278	3.47689	2.19553	4.62075	4.44553	Agrn	4	156165290	156197488	-	9285	protein_coding	agrin [Source:MGI Symbol;Acc:MGI:87961]	-
ENSMUSG00000061482	2.08012	0.0212782	1.32885	0.279746	0.0716161	0.116468	Hist1h4d	13	23581598	23582735	+	1138	protein_coding	histone cluster 1, H4d [Source:MGI Symbol;Acc:MGI:2448423]	-
ENSMUSG00000001029	14.0291	40.3405	15.4607	29.8091	14.047	14.2731	Icam2	11	106377656	106388075	-	1904	protein_coding	intercellular adhesion molecule 2 [Source:MGI Symbol;Acc:MGI:96394]	-
ENSMUSG00000026121	6.04466	1.36201	0.746922	1.05656	1.21506	1.57733	Sema4c	1	36548639	36558349	-	4593	protein_coding	sema domain, immunoglobulin domain (Ig), transmembrane domain (TM) and short cytoplasmic domain, (semaphorin) 4C [Source:MGI Symbol;Acc:MGI:109252]	-
ENSMUSG00000031701	50.4995	22.5634	23.5415	23.8963	29.5492	26.3613	Dnaja2	8	85537633	85555344	-	2975	protein_coding	DnaJ heat shock protein family (Hsp40) member A2 [Source:MGI Symbol;Acc:MGI:1931882]	-
ENSMUSG00000085396	1.39855	5.58395	6.36843	5.14174	12.4155	11.6949	Firre	X	50555744	50635321	-	8247	processed_transcript	functional intergenic repeating RNA element [Source:MGI Symbol;Acc:MGI:2147989]	-
ENSMUSG00000026020	4.6822	1.66699	1.69703	1.74862	1.58518	1.39644	Nop58	1	59684971	59719044	+	10758	protein_coding	NOP58 ribonucleoprotein [Source:MGI Symbol;Acc:MGI:1933184]	-
ENSMUSG00000034765	7.06246	1.58661	2.8604	2.23216	1.91257	2.40228	Dusp5	19	53529109	53542431	+	2473	protein_coding	dual specificity phosphatase 5 [Source:MGI Symbol;Acc:MGI:2685183]	-
ENSMUSG00000043088	0.046259	0.980178	1.46494	1.74688	2.50581	2.43274	Il17re	6	113458484	113470758	+	5868	protein_coding	interleukin 17 receptor E [Source:MGI Symbol;Acc:MGI:1889371]	-
ENSMUSG00000106404	1.50616	0	0	0.273165	0	0	Gm42919	5	48802728	48804011	-	1284	TEC	predicted gene 42919 [Source:MGI Symbol;Acc:MGI:5663056]	-
ENSMUSG00000006673	8.93516	3.65743	3.77548	3.74578	3.27538	2.88343	Qrich1	9	108516806	108560163	+	7918	protein_coding	glutamine-rich 1 [Source:MGI Symbol;Acc:MGI:1916482]	-
ENSMUSG00000108365	1.34251	0.0332348	0.639264	0.315551	0.0268443	0	Gm44951	7	80036705	80038728	+	2024	TEC	predicted gene 44951 [Source:MGI Symbol;Acc:MGI:5753527]	-
ENSMUSG00000033526	0.623431	1.49765	1.83384	1.01233	1.41047	1.66354	Ppip5k1	2	121310561	121355396	-	12486	protein_coding	diphosphoinositol pentakisphosphate kinase 1 [Source:MGI Symbol;Acc:MGI:2443281]	-
ENSMUSG00000008384	40.9036	16.2006	13.7239	16.7545	14.1815	15.3223	Sertad1	7	27486910	27490316	+	1344	protein_coding	SERTA domain containing 1 [Source:MGI Symbol;Acc:MGI:1913438]	-
ENSMUSG00000029125	5.62848	2.03874	2.53376	2.69123	3.66001	2.10957	Stx18	5	38038742	38137765	+	4593	protein_coding	syntaxin 18 [Source:MGI Symbol;Acc:MGI:1918366]	-
ENSMUSG00000027351	15.1147	6.21118	5.32302	7.00976	3.75212	3.92861	Spred1	2	117121374	117182279	+	6784	protein_coding	sprouty protein with EVH-1 domain 1, related sequence [Source:MGI Symbol;Acc:MGI:2150016]	-
ENSMUSG00000112023	13.4495	0.848672	0.219933	0.289602	1.69489	0.670153	Lilr4b	10	51480632	51486703	+	5439	protein_coding	leukocyte immunoglobulin-like receptor, subfamily B, member 4B [Source:MGI Symbol;Acc:MGI:102702]	-
ENSMUSG00000106464	0	0.707934	0.142895	0.498356	0.412382	1.06169	C130083M11Rik	5	52199984	52216434	-	2072	lincRNA	RIKEN cDNA C130083M11 gene [Source:MGI Symbol;Acc:MGI:3041216]	-
ENSMUSG00000030579	115.001	42.0403	42.3796	22.1626	26.7472	19.3101	Tyrobp	7	30413760	30417585	+	667	protein_coding	TYRO protein tyrosine kinase binding protein [Source:MGI Symbol;Acc:MGI:1277211]	-
ENSMUSG00000110685	0.518197	0.0100531	0.160643	0.323591	0.0374412	0.125526	Gm5373	8	71824641	71857281	-	3613	transcribed_unprocessed_pseudogene	predicted gene 5373 [Source:MGI Symbol;Acc:MGI:3779485]	-
ENSMUSG00000023349	8.23267	1.52128	3.0464	0.882287	0.357338	1.35735	Clec4n	6	123229843	123247021	+	1420	protein_coding	C-type lectin domain family 4, member n [Source:MGI Symbol;Acc:MGI:1861231]	-
ENSMUSG00000113570	0.726412	0	0.046301	0.110631	0	0	Gm5953	12	19288562	19291177	+	2616	TEC	predicted gene 5953 [Source:MGI Symbol;Acc:MGI:3647171]	-
ENSMUSG00000103030	0	0.808222	0.21549	0.357656	0.150498	0.039848	E330011M16Rik	1	55051319	55053112	-	1794	TEC	RIKEN cDNA E330011M16 gene [Source:MGI Symbol;Acc:MGI:3704186]	-
ENSMUSG00000053702	12.3393	7.18193	4.94981	9.4796	10.9057	8.54717	Nebl	2	17343909	17731464	-	15235	protein_coding	nebulette [Source:MGI Symbol;Acc:MGI:1921353]	-
ENSMUSG00000046822	0.981348	3.29494	5.15486	2.53448	2.57058	1.81991	Slc39a3	10	81028538	81037426	-	4016	protein_coding	solute carrier family 39 (zinc transporter), member 3 [Source:MGI Symbol;Acc:MGI:2147269]	-
ENSMUSG00000107390	0.631302	0.00853027	0.181626	0.0407811	0	0	Gm43323	5	66080209	66084466	-	4258	TEC	predicted gene 43323 [Source:MGI Symbol;Acc:MGI:5663460]	-
ENSMUSG00000027360	19.5618	8.02196	6.73493	12.0056	22.0678	26.5348	Hdc	2	126593667	126619299	-	6389	protein_coding	histidine decarboxylase [Source:MGI Symbol;Acc:MGI:96062]	-
ENSMUSG00000102871	0.604248	0.00371504	0.141644	0.053282	0	0	Gm37143	1	9286922	9290180	+	3259	TEC	predicted gene, 37143 [Source:MGI Symbol;Acc:MGI:5610371]	-
ENSMUSG00000037296	6.58013	2.65939	4.12582	3.61361	2.89749	3.02769	Lsm1	8	25785288	25803975	+	3093	protein_coding	LSM1 homolog, mRNA degradation associated [Source:MGI Symbol;Acc:MGI:1914457]	-
ENSMUSG00000020893	6.71247	2.52014	4.91876	3.79485	12.0153	4.91713	Per1	11	69095217	69109960	+	5631	protein_coding	period circadian clock 1 [Source:MGI Symbol;Acc:MGI:1098283]	-
ENSMUSG00000030142	12.8121	0.160141	0.259109	0.365639	0.152393	0.0633524	Clec4e	6	123281789	123289870	-	4965	protein_coding	C-type lectin domain family 4, member e [Source:MGI Symbol;Acc:MGI:1861232]	-
ENSMUSG00000110539	1.86654	0	0	0.228663	0.241729	0.373651	Gm45864	8	47773555	47777802	+	1019	lincRNA	predicted gene 45864 [Source:MGI Symbol;Acc:MGI:5804979]	-
ENSMUSG00000000739	1.22527	3.51787	3.13571	3.55487	2.37824	2.25754	Sult5a1	8	123140192	123158315	-	4419	protein_coding	sulfotransferase family 5A, member 1 [Source:MGI Symbol;Acc:MGI:1931463]	-
ENSMUSG00000086715	3.11988	0	0.800078	0.384598	0.157019	0	B230112J18Rik	5	116312360	116318281	+	602	lincRNA	RIKEN cDNA B230112J18 gene [Source:MGI Symbol;Acc:MGI:1925096]	-
ENSMUSG00000084243	6.56807	0.139969	1.28964	0.564282	0.0774423	0	Gm13784	5	114237176	114237925	-	519	processed_pseudogene	predicted gene 13784 [Source:MGI Symbol;Acc:MGI:3649548]	-
ENSMUSG00000060073	33.7608	17.2327	20.9204	18.7239	21.502	19.2008	Psma3	12	70974621	70996347	+	3894	protein_coding	proteasome (prosome, macropain) subunit, alpha type 3 [Source:MGI Symbol;Acc:MGI:104883]	-
ENSMUSG00000061286	0.992785	2.73699	3.73086	2.1626	2.59559	2.80648	Exosc5	7	25659164	25671368	+	6268	protein_coding	exosome component 5 [Source:MGI Symbol;Acc:MGI:107889]	-
ENSMUSG00000083161	0	0.491482	1.92236	0.449244	0.496864	0.6331	Gm11427	11	83224454	83260960	+	2958	transcribed_unprocessed_pseudogene	predicted gene 11427 [Source:MGI Symbol;Acc:MGI:3651774]	-
ENSMUSG00000015291	11.5704	22.042	20.9742	21.1624	23.3032	24.3164	Gdi1	X	74304998	74311862	+	4296	protein_coding	guanosine diphosphate (GDP) dissociation inhibitor 1 [Source:MGI Symbol;Acc:MGI:99846]	-
ENSMUSG00000029223	8.32812	1.54166	2.82211	2.95786	2.9265	2.5361	Uchl1	5	66676091	66687234	+	1632	protein_coding	ubiquitin carboxy-terminal hydrolase L1 [Source:MGI Symbol;Acc:MGI:103149]	-
ENSMUSG00000027317	0	2.5224	7.71035	5.39838	4.77928	7.9421	Ppp1r14d	2	119218119	119229906	-	852	protein_coding	protein phosphatase 1, regulatory inhibitor subunit 14D [Source:MGI Symbol;Acc:MGI:1919362]	-
ENSMUSG00000067344	20.8136	5.3473	16.9945	8.72287	7.45604	6.37694	Rps25-ps1	6	145266400	145266777	+	378	processed_pseudogene	ribosomal protein S25, pseudogene 1 [Source:MGI Symbol;Acc:MGI:3642902]	-
ENSMUSG00000016257	37.0743	17.1151	18.3497	14.3001	13.247	13.3532	Prelid3b	2	174465067	174473081	-	1860	protein_coding	PRELI domain containing 3B [Source:MGI Symbol;Acc:MGI:1913640]	-
ENSMUSG00000097779	3.42008	0.249837	1.70684	1.04071	0.802968	1.29052	4833407H14Rik	19	53460631	53462723	+	1485	lincRNA	RIKEN cDNA 4833407H14 gene [Source:MGI Symbol;Acc:MGI:1921149]	-
ENSMUSG00000078906	0.941021	0	0	0.0288114	0	0	Gm14444	2	175010241	175019248	+	2009	protein_coding	predicted gene 14444 [Source:MGI Symbol;Acc:MGI:3652325]	zf-C2H2
ENSMUSG00000115548	1.84335	0	0.810234	0.379625	0	0	5430440P10Rik	14	105427559	105437716	+	1016	lincRNA	RIKEN cDNA 5430440P10 gene [Source:MGI Symbol;Acc:MGI:1918612]	-
ENSMUSG00000036376	8.46881	3.46736	2.71656	3.80778	3.30037	2.50079	Abt1	13	23418361	23423866	-	4456	protein_coding	activator of basal transcription 1 [Source:MGI Symbol;Acc:MGI:1353636]	-
ENSMUSG00000111471	3.10966	0	0	0.464036	0	0	Gm47350	9	65054882	65094355	-	597	antisense	predicted gene, 47350 [Source:MGI Symbol;Acc:MGI:6096250]	-
ENSMUSG00000002393	1.17561	3.59802	4.53341	5.44373	4.3328	5.93766	Nr2f6	8	71374123	71381960	-	2983	protein_coding	nuclear receptor subfamily 2, group F, member 6 [Source:MGI Symbol;Acc:MGI:1352453]	RXR-like
ENSMUSG00000062444	0	0.243914	0.0192473	0.482887	0.11696	0.00908786	Ap3b2	7	81460399	81493925	-	6293	protein_coding	adaptor-related protein complex 3, beta 2 subunit [Source:MGI Symbol;Acc:MGI:1100869]	-
ENSMUSG00000031428	0	0.301731	0.549765	0.410493	0.274878	0.13195	Zcchc18	X	136993155	136998472	+	4876	protein_coding	zinc finger, CCHC domain containing 18 [Source:MGI Symbol;Acc:MGI:1914245]	-
ENSMUSG00000022582	2.73458	0.102822	0	0.124986	0.114765	0	Ly6g	15	75155240	75159126	+	942	protein_coding	lymphocyte antigen 6 complex, locus G [Source:MGI Symbol;Acc:MGI:109440]	-
ENSMUSG00000000628	3.59267	1.11196	2.17111	1.22958	1.6598	1.64338	Hk2	6	82725025	82774454	-	5969	protein_coding	hexokinase 2 [Source:MGI Symbol;Acc:MGI:1315197]	-
ENSMUSG00000028826	1.69856	3.94152	3.09803	3.24592	5.31595	4.45774	Maco1	4	134802759	134853345	-	6744	protein_coding	macoilin 1 [Source:MGI Symbol;Acc:MGI:1913396]	-
ENSMUSG00000112547	2.37953	0.202513	0.125378	0.546915	0.00963388	0.454772	Gm47096	12	44220387	44269118	-	2086	lincRNA	predicted gene, 47096 [Source:MGI Symbol;Acc:MGI:6095829]	-
ENSMUSG00000022270	15.4262	5.86858	6.41761	8.16542	13.6571	15.0908	Retreg1	15	25843180	25973687	+	4142	protein_coding	reticulophagy regulator 1 [Source:MGI Symbol;Acc:MGI:1913520]	-
ENSMUSG00000032998	3.87104	1.78382	1.92337	2.43906	2.32305	2.38611	Foxj3	4	119537004	119629119	+	10973	protein_coding	forkhead box J3 [Source:MGI Symbol;Acc:MGI:2443432]	Fork
ENSMUSG00000104895	2.61472	0	1.1602	0.222136	0.100492	0	Gm8454	5	146017031	146017841	-	811	processed_pseudogene	predicted gene 8454 [Source:MGI Symbol;Acc:MGI:3644804]	-
ENSMUSG00000074715	0	0.293553	0.39894	0.0782808	0.0263517	0.0147579	Ccl28	13	119623819	119654359	+	4844	protein_coding	chemokine (C-C motif) ligand 28 [Source:MGI Symbol;Acc:MGI:1861731]	-
ENSMUSG00000074250	1.38643	0	0.874334	0.109258	0.169774	0	Gm10653	9	62841477	62868000	-	1347	transcribed_processed_pseudogene	predicted gene 10653 [Source:MGI Symbol;Acc:MGI:3642572]	-
ENSMUSG00000019173	93.1404	49.0009	51.7282	54.4627	48.8871	44.5425	Rab5c	11	100715009	100738215	-	2194	protein_coding	RAB5C, member RAS oncogene family [Source:MGI Symbol;Acc:MGI:105306]	-
ENSMUSG00000002111	15.5612	4.60152	3.81542	4.71386	2.70305	2.62062	Spi1	2	91082390	91115756	+	2695	protein_coding	spleen focus forming virus (SFFV) proviral integration oncogene [Source:MGI Symbol;Acc:MGI:98282]	ETS
ENSMUSG00000109097	0	0.424521	0.181105	0.278144	0.0300482	0.0342045	Gm29683	7	70178868	70337852	-	3344	lincRNA	predicted gene, 29683 [Source:MGI Symbol;Acc:MGI:5588842]	-
ENSMUSG00000043065	0.226481	2.36057	2.8105	1.50081	3.63371	2.85408	Spice1	16	44347121	44388497	+	5416	protein_coding	spindle and centriole associated protein 1 [Source:MGI Symbol;Acc:MGI:1196252]	-
ENSMUSG00000100277	0.367871	0	0	0.0723665	0.0193271	0	1810053B23Rik	16	93342504	93366668	-	5199	processed_transcript	RIKEN cDNA 1810053B23 gene [Source:MGI Symbol;Acc:MGI:1917107]	-
ENSMUSG00000029068	3.30835	12.5767	18.2732	12.2349	21.2788	20.9461	Ccnl2	4	155812489	155824543	+	5278	protein_coding	cyclin L2 [Source:MGI Symbol;Acc:MGI:1927119]	-
ENSMUSG00000112749	3.20776	0	0	0	0	0	Gm48428	10	96336090	96345824	-	580	lincRNA	predicted gene, 48428 [Source:MGI Symbol;Acc:MGI:6097928]	-
ENSMUSG00000095620	12.0589	0.675012	0.0210613	0.867477	2.24316	3.47114	2010005H15Rik	16	36221468	36257444	+	639	protein_coding	RIKEN cDNA 2010005H15 gene [Source:MGI Symbol;Acc:MGI:1924020]	-
ENSMUSG00000039886	22.0712	8.54481	8.88262	6.20341	7.32349	5.77392	Tmem120a	5	135735485	135744448	-	1730	protein_coding	transmembrane protein 120A [Source:MGI Symbol;Acc:MGI:2686991]	-
ENSMUSG00000064057	172.98	36.3646	1873.55	106.812	7.54241	8.63096	Scgb3a1	11	49663610	49665118	+	598	protein_coding	secretoglobin, family 3A, member 1 [Source:MGI Symbol;Acc:MGI:1915912]	-
ENSMUSG00000018263	10.0018	2.88332	2.07371	2.73253	1.14051	0.799549	Tbx5	5	119832668	119885219	+	4675	protein_coding	T-box 5 [Source:MGI Symbol;Acc:MGI:102541]	T-box
ENSMUSG00000056412	10.5974	1.24813	8.46199	3.31496	2.67324	4.30022	Gm12396	4	40775259	40775564	-	306	processed_pseudogene	predicted gene 12396 [Source:MGI Symbol;Acc:MGI:3649201]	-
ENSMUSG00000059623	1.93583	0.139315	0	0.139655	0.107915	0.493374	Olfr39	9	20282351	20287578	+	2028	protein_coding	olfactory receptor 39 [Source:MGI Symbol;Acc:MGI:1313142]	-
ENSMUSG00000097157	0.808384	0.0162776	0.340294	0.0869053	0	0	Gm26512	12	90738201	90869235	+	3719	bidirectional_promoter_lncRNA	predicted gene, 26512 [Source:MGI Symbol;Acc:MGI:5477006]	-
ENSMUSG00000035678	6.91744	0.810008	0.555976	1.17579	0.681402	0.715272	Tnfsf9	17	57105325	57107757	+	1290	protein_coding	tumor necrosis factor (ligand) superfamily, member 9 [Source:MGI Symbol;Acc:MGI:1101058]	-
ENSMUSG00000105942	0.506866	0	0.0201933	0.214952	0	0	Gm43175	5	51907122	51910931	-	3810	TEC	predicted gene 43175 [Source:MGI Symbol;Acc:MGI:5663312]	-
ENSMUSG00000064329	0.289875	0.00217249	0.0831901	0.117641	0.0152628	0.0198189	Scn1a	2	66270778	66440840	-	11146	protein_coding	sodium channel, voltage-gated, type I, alpha [Source:MGI Symbol;Acc:MGI:98246]	-
ENSMUSG00000029390	82.403	43.1249	47.1974	54.1497	49.2898	52.9071	Tmed2	5	124540695	124550506	+	2527	protein_coding	transmembrane p24 trafficking protein 2 [Source:MGI Symbol;Acc:MGI:1929269]	-
ENSMUSG00000026826	0.538568	2.77597	2.01744	4.03314	5.60569	6.20108	Nr4a2	2	57106830	57124003	-	4059	protein_coding	nuclear receptor subfamily 4, group A, member 2 [Source:MGI Symbol;Acc:MGI:1352456]	NGFIB-like
ENSMUSG00000106135	1.74948	0	0	0.0716362	0	0	Gm6543	5	21598740	21599547	+	808	processed_pseudogene	predicted gene 6543 [Source:MGI Symbol;Acc:MGI:3644322]	-
ENSMUSG00000087458	1.94286	0	0	0	0	0	Gm13999	2	120024807	120027453	-	969	antisense	predicted gene 13999 [Source:MGI Symbol;Acc:MGI:3651905]	-
ENSMUSG00000114936	1.11101	0.0155222	0.155286	0.192134	0.104248	0.0183301	Gm47061	13	40723110	40725449	+	2340	antisense	predicted gene, 47061 [Source:MGI Symbol;Acc:MGI:6095771]	-
ENSMUSG00000007564	50.287	29.135	33.8101	31.8885	32.5736	36.7533	Ppp2r1a	17	20945311	20965916	+	3411	protein_coding	protein phosphatase 2, regulatory subunit A, alpha [Source:MGI Symbol;Acc:MGI:1926334]	-
ENSMUSG00000112343	2.02623	7.49868	4.03377	7.91063	12.4918	11.1709	Sfta3-ps	12	56488321	56529427	-	8017	processed_transcript	surfactant associated 3, pseudogene [Source:MGI Symbol;Acc:MGI:2144804]	-
ENSMUSG00000028078	0.0149019	0.281329	0.614132	0.206521	0.0925831	0.0519654	Dclk2	3	86786151	86920852	-	10553	protein_coding	doublecortin-like kinase 2 [Source:MGI Symbol;Acc:MGI:1918012]	-
ENSMUSG00000090681	0	5.65982	4.38826	2.35599	0	0	Gm3221	14	43593005	43595276	-	440	unprocessed_pseudogene	predicted gene 3221 [Source:MGI Symbol;Acc:MGI:3781400]	-
ENSMUSG00000089999	47.3148	11.7496	8.43752	9.46444	11.1405	12.031	Gm6485	3	104752727	104753165	-	439	transcribed_processed_pseudogene	predicted gene 6485 [Source:MGI Symbol;Acc:MGI:3644007]	-
ENSMUSG00000041809	0.299134	3.4286	7.7089	6.67253	18.8477	18.8218	Efhc1	1	20951626	20990841	+	2208	protein_coding	EF-hand domain (C-terminal) containing 1 [Source:MGI Symbol;Acc:MGI:1919127]	-
ENSMUSG00000033554	2.65203	0.70142	1.18908	0.596996	0.667719	0.712976	Dph5	3	115887837	115934361	+	8027	protein_coding	diphthamide biosynthesis 5 [Source:MGI Symbol;Acc:MGI:1916990]	-
ENSMUSG00000021922	26.2006	10.4264	15.6085	8.34788	5.30755	7.14872	Itih4	14	30886476	30902353	+	3690	protein_coding	inter alpha-trypsin inhibitor, heavy chain 4 [Source:MGI Symbol;Acc:MGI:109536]	-
ENSMUSG00000086944	2.23715	0.0341051	0.0947757	0.83762	0	0	Gm15859	16	4729869	4730809	+	710	antisense	predicted gene 15859 [Source:MGI Symbol;Acc:MGI:3801904]	-
ENSMUSG00000036223	1.47899	0.0362902	0.0756359	0.292018	0.120681	0.0964236	Ska1	18	74195299	74207818	-	2669	protein_coding	spindle and kinetochore associated complex subunit 1 [Source:MGI Symbol;Acc:MGI:1913718]	-
ENSMUSG00000041629	16.4479	7.68583	9.87935	9.83475	8.57757	7.95238	Fam104a	11	113661319	113684155	-	2619	protein_coding	family with sequence similarity 104, member A [Source:MGI Symbol;Acc:MGI:106351]	-
ENSMUSG00000000420	23.4272	10.0692	7.06738	7.98869	8.65628	6.81567	Galnt1	18	24205344	24286818	+	5519	protein_coding	polypeptide N-acetylgalactosaminyltransferase 1 [Source:MGI Symbol;Acc:MGI:894693]	-
ENSMUSG00000114238	7.74614	0.0315294	3.72417	3.16076	0.141492	0	Rps17-ps1	13	41234694	41235077	-	384	processed_pseudogene	ribosomal protein S17, pseudogene 1 [Source:MGI Symbol;Acc:MGI:3647979]	-
ENSMUSG00000108372	0.63024	0.013184	0.154286	0.301695	0.0967035	0.0481093	Gm45124	7	44386400	44389154	+	2755	TEC	predicted gene 45124 [Source:MGI Symbol;Acc:MGI:5753700]	-
ENSMUSG00000034391	2.66483	0.252334	0.693948	0.690598	0.260692	0.228033	Fbxo15	18	84934782	84981472	+	3359	protein_coding	F-box protein 15 [Source:MGI Symbol;Acc:MGI:1354755]	-
ENSMUSG00000036430	18.6434	7.38015	10.4388	10.0801	9.49549	9.48289	Tbcc	17	46890684	46891847	+	1164	protein_coding	tubulin-specific chaperone C [Source:MGI Symbol;Acc:MGI:1919976]	-
ENSMUSG00000115725	0.4732	0.00716939	0.0243567	0.0991249	0	0.0032702	4930572G02Rik	14	48537991	48571888	+	6755	lincRNA	RIKEN cDNA 4930572G02 gene [Source:MGI Symbol;Acc:MGI:1923193]	-
ENSMUSG00000031875	4.62856	11.1186	9.88413	8.15009	4.74502	5.07592	Cmtm3	8	104339410	104347672	+	2986	protein_coding	CKLF-like MARVEL transmembrane domain containing 3 [Source:MGI Symbol;Acc:MGI:2447162]	-
ENSMUSG00000030595	13.75	4.79914	5.51371	5.28568	6.63953	5.65633	Nfkbib	7	28758251	28767512	-	2169	protein_coding	nuclear factor of kappa light polypeptide gene enhancer in B cells inhibitor, beta [Source:MGI Symbol;Acc:MGI:104752]	-
ENSMUSG00000108644	2.48085	0	0.103132	0.310359	0.109248	0.266504	Gm44920	7	3591646	3604150	-	746	lincRNA	predicted gene 44920 [Source:MGI Symbol;Acc:MGI:5753496]	-
ENSMUSG00000021365	15.5953	7.62551	6.14477	11.0313	6.01609	5.67726	Nedd9	13	41309581	41487362	-	6376	protein_coding	neural precursor cell expressed, developmentally down-regulated gene 9 [Source:MGI Symbol;Acc:MGI:97302]	-
ENSMUSG00000107012	0.498931	0	0	0.144264	0	0	4930528J11Rik	6	29912023	29915633	-	3611	TEC	RIKEN cDNA 4930528J11 gene [Source:MGI Symbol;Acc:MGI:1922474]	-
ENSMUSG00000022146	7.21915	2.33405	2.43773	2.00342	1.84271	2.44598	Osmr	15	6813577	6874969	-	12113	protein_coding	oncostatin M receptor [Source:MGI Symbol;Acc:MGI:1330819]	-
ENSMUSG00000082440	3.98013	0	0	0.504419	0	0	Gm4914	X	114948913	114949371	+	459	processed_pseudogene	predicted gene 4914 [Source:MGI Symbol;Acc:MGI:3646569]	-
ENSMUSG00000039361	18.0557	8.14779	7.37682	7.36851	5.83562	6.08174	Picalm	7	90130213	90213465	+	15732	protein_coding	phosphatidylinositol binding clathrin assembly protein [Source:MGI Symbol;Acc:MGI:2385902]	-
ENSMUSG00000028098	20.8608	10.9915	11.7974	9.96669	9.67161	6.50153	Rnf115	3	96727664	96791638	+	2893	protein_coding	ring finger protein 115 [Source:MGI Symbol;Acc:MGI:1915095]	-
ENSMUSG00000114665	0.781757	0	0.314691	0.280343	0	0	Gm30918	13	37541357	37549725	+	2372	lincRNA	predicted gene, 30918 [Source:MGI Symbol;Acc:MGI:5590077]	-
ENSMUSG00000043505	7.41616	2.59217	3.73447	3.23613	2.00888	1.36751	Gimap5	6	48746197	48754210	+	4149	protein_coding	GTPase, IMAP family member 5 [Source:MGI Symbol;Acc:MGI:2442232]	-
ENSMUSG00000109226	0.548308	0.00348211	0.305886	0.0929539	0	0	Gm45039	7	93604840	93608316	-	3477	TEC	predicted gene 45039 [Source:MGI Symbol;Acc:MGI:5753615]	-
ENSMUSG00000085471	0	0.315394	0.0593983	0.0888723	0.0305192	0	4933423P22Rik	2	90479236	90488425	+	5536	antisense	RIKEN cDNA 4933423P22 gene [Source:MGI Symbol;Acc:MGI:1918408]	-
ENSMUSG00000085643	3.0968	0.062125	1.59736	0.337654	0	0	Gm12519	4	55969023	55993739	-	693	lincRNA	predicted gene 12519 [Source:MGI Symbol;Acc:MGI:3652272]	-
ENSMUSG00000078915	2.04673	0.0192179	0.151941	2.49271	0.0215606	0.141476	Hsp25-ps1	13	45078498	45079127	-	630	processed_pseudogene	heat shock protein 25, pseudogene 1 [Source:MGI Symbol;Acc:MGI:96241]	-
ENSMUSG00000021493	20.652	8.03905	9.61735	6.27409	3.71422	5.7152	Pdlim7	13	55495795	55513676	-	4849	protein_coding	PDZ and LIM domain 7 [Source:MGI Symbol;Acc:MGI:1914649]	-
ENSMUSG00000022687	0.939827	3.82695	5.00854	6.09574	14.2483	16.5675	Boc	16	44485049	44558897	-	4451	protein_coding	biregional cell adhesion molecule-related/down-regulated by oncogenes (Cdon) binding protein [Source:MGI Symbol;Acc:MGI:2151153]	-
ENSMUSG00000044566	1.07918	0.0770381	0.479263	0.569152	0.294192	0.416289	Cage1	13	38006052	38037069	-	4523	protein_coding	cancer antigen 1 [Source:MGI Symbol;Acc:MGI:1918463]	-
ENSMUSG00000052949	0.99388	0.289167	0.982299	0.458131	0.306903	0.389836	Rnf157	11	116336353	116413032	-	9537	protein_coding	ring finger protein 157 [Source:MGI Symbol;Acc:MGI:2442484]	-
ENSMUSG00000063558	0.738329	2.01685	2.222	2.09828	6.29168	4.95169	Aox1	1	58029931	58106413	+	8690	protein_coding	aldehyde oxidase 1 [Source:MGI Symbol;Acc:MGI:88035]	-
ENSMUSG00000087033	3.09266	0	0	0	0	0	Gm14155	2	151829067	151832108	+	587	lincRNA	predicted gene 14155 [Source:MGI Symbol;Acc:MGI:3651338]	-
ENSMUSG00000051359	3.3224	7.99782	5.74458	8.62116	4.63741	4.49537	Ncald	15	37366175	37792570	-	8581	protein_coding	neurocalcin delta [Source:MGI Symbol;Acc:MGI:1196326]	-
ENSMUSG00000109198	0.705204	0.028713	0.459771	0.418075	0.119564	0	D7Bwg0826e	7	44894305	44898099	-	3795	TEC	DNA segment, Chr 7, Brigham & Women's Genetics 0826 expressed [Source:MGI Symbol;Acc:MGI:106455]	-
ENSMUSG00000047237	0.743753	0	0	0.106401	0.032837	0	Fbxw21	9	109139447	109162041	-	2448	protein_coding	F-box and WD-40 domain protein 21 [Source:MGI Symbol;Acc:MGI:2443323]	-
ENSMUSG00000086630	3.16095	0	0.116824	0.0502448	0	0	Gm14397	2	165159412	165163969	+	576	antisense	predicted gene 14397 [Source:MGI Symbol;Acc:MGI:3649371]	-
ENSMUSG00000030203	8.78981	3.32368	2.29549	3.46044	2.91504	2.71861	Dusp16	6	134715468	134792625	-	7798	protein_coding	dual specificity phosphatase 16 [Source:MGI Symbol;Acc:MGI:1917936]	-
ENSMUSG00000097231	0.362171	0	0.0351021	0.316322	0.0340052	0	Gm26852	7	19382220	19392718	-	5751	antisense	predicted gene, 26852 [Source:MGI Symbol;Acc:MGI:5477346]	-
ENSMUSG00000047515	0	0.36435	0.225923	0.166626	0.0543545	0.0979399	BC049715	6	136827626	136840662	+	6462	protein_coding	cDNA sequence BC049715 [Source:MGI Symbol;Acc:MGI:3605234]	-
ENSMUSG00000082762	2.78288	0.226455	0.486892	0.430198	0.272374	0.163986	Gm12366	4	35202103	35202975	-	873	processed_pseudogene	predicted gene 12366 [Source:MGI Symbol;Acc:MGI:3649557]	-
ENSMUSG00000037096	13.2661	2.14535	5.4166	1.10305	1.37714	2.98745	Gm9762	3	78966356	78966799	-	444	processed_pseudogene	predicted pseudogene 9762 [Source:MGI Symbol;Acc:MGI:3704220]	-
ENSMUSG00000116716	0	2.0143	1.20265	1.74106	2.10103	0.429538	AC154691.1	16	95297356	95301661	-	699	antisense	novel transcript, antisense to Kcnj15	-
ENSMUSG00000021149	7.08326	2.97682	3.14351	3.80102	4.16629	4.51112	Gtpbp4	13	8966331	8996083	-	9566	protein_coding	GTP binding protein 4 [Source:MGI Symbol;Acc:MGI:1916487]	-
ENSMUSG00000027485	18.0015	3.13438	107.4	8.50678	0.74211	0.257434	Bpifb1	2	154190818	154220369	+	3617	protein_coding	BPI fold containing family B, member 1 [Source:MGI Symbol;Acc:MGI:2137431]	-
ENSMUSG00000037376	5.32706	1.54748	1.8665	1.90233	1.6645	1.79463	Trmt6	2	132804207	132816055	-	5384	protein_coding	tRNA methyltransferase 6 [Source:MGI Symbol;Acc:MGI:1914176]	-
ENSMUSG00000114626	1.61228	0	0	0.126601	0	0	Gm48266	14	12769408	12770550	-	1143	TEC	predicted gene, 48266 [Source:MGI Symbol;Acc:MGI:6097688]	-
ENSMUSG00000028047	1.27101	5.19042	2.24122	2.68437	2.8572	2.21936	Thbs3	3	89215180	89226837	+	4823	protein_coding	thrombospondin 3 [Source:MGI Symbol;Acc:MGI:98739]	-
ENSMUSG00000027574	1.40943	9.96434	5.40359	9.95776	10.2839	38.9187	Nkain4	2	180934772	180954699	-	1239	protein_coding	Na+/K+ transporting ATPase interacting 4 [Source:MGI Symbol;Acc:MGI:1915372]	-
ENSMUSG00000104544	2.51953	0	1.4269	0	0	0.47957	Gm32754	3	140904998	140917459	-	737	lincRNA	predicted gene, 32754 [Source:MGI Symbol;Acc:MGI:5591913]	-
ENSMUSG00000097750	2.29507	0.652378	2.24063	1.19438	0.406564	0.486788	Gm4673	7	30956909	30961619	+	4452	antisense	predicted gene 4673 [Source:MGI Symbol;Acc:MGI:3782854]	-
ENSMUSG00000017737	6.44028	0.869044	1.05462	1.14245	0.745457	0.731112	Mmp9	2	164940780	164955850	+	3539	protein_coding	matrix metallopeptidase 9 [Source:MGI Symbol;Acc:MGI:97011]	-
ENSMUSG00000001134	7.80298	2.50662	2.34526	3.24592	3.38711	3.29382	Uxt	X	20941722	20962017	-	1639	protein_coding	ubiquitously expressed prefoldin like chaperone [Source:MGI Symbol;Acc:MGI:1277988]	-
ENSMUSG00000087351	3.3608	0	0	0.215576	0.6116	0	Gm11464	2	165980726	165992517	-	537	lincRNA	predicted gene 11464 [Source:MGI Symbol;Acc:MGI:3650572]	-
ENSMUSG00000100632	1.08579	0	0.843916	0.03427	0.108944	0.392366	9430060I03Rik	1	92933526	92950590	-	1689	antisense	RIKEN cDNA 9430060I03 gene [Source:MGI Symbol;Acc:MGI:3702484]	-
ENSMUSG00000081851	1.59332	0	0.577048	0.204582	0	0	Gm13323	2	17796834	17797984	-	1151	processed_pseudogene	predicted gene 13323 [Source:MGI Symbol;Acc:MGI:3650423]	-
ENSMUSG00000068566	12.5445	26.3933	16.2314	17.2368	13.2167	12.9769	Myadm	7	3289080	3300442	+	4480	protein_coding	myeloid-associated differentiation marker [Source:MGI Symbol;Acc:MGI:1355332]	-
ENSMUSG00000053581	11.2131	3.91367	7.09947	5.17836	4.38867	2.85262	Zfand2a	5	139471211	139484549	-	3407	protein_coding	zinc finger, AN1-type domain 2A [Source:MGI Symbol;Acc:MGI:2140729]	-
ENSMUSG00000008475	145.62	76.6042	88.7403	80.9227	66.8026	66.4593	Arpc5	1	152766542	152775597	+	2276	protein_coding	actin related protein 2/3 complex, subunit 5 [Source:MGI Symbol;Acc:MGI:1915021]	-
ENSMUSG00000097971	67.7749	250.91	851.776	476.479	48.6031	39.0511	Gm26917	17	39843013	39846341	+	3329	lincRNA	predicted gene, 26917 [Source:MGI Symbol;Acc:MGI:5504032]	-
ENSMUSG00000087660	1.41439	0	0	0.0901967	0.0138746	0.0511146	B230398E01Rik	3	94959034	94962048	-	1958	antisense	RIKEN cDNA B230398E01 gene [Source:MGI Symbol;Acc:MGI:1925930]	-
ENSMUSG00000030144	33.5923	1.64286	2.10962	1.05757	0.647146	1.2239	Clec4d	6	123262111	123275265	+	1599	protein_coding	C-type lectin domain family 4, member d [Source:MGI Symbol;Acc:MGI:1298389]	-
ENSMUSG00000115020	0.171851	0	0.169813	0	0.0275528	0	Vmn1r218	13	23133155	23146112	+	10430	protein_coding	vomeronasal 1 receptor 218 [Source:MGI Symbol;Acc:MGI:2159691]	-
ENSMUSG00000075199	0.651547	0	0.00978419	0	0	0	Olfr52	2	86179412	86185683	-	2751	protein_coding	olfactory receptor 52 [Source:MGI Symbol;Acc:MGI:1333748]	-
ENSMUSG00000053965	4.40923	10.1008	5.76601	9.42631	4.54952	4.45628	Pde5a	3	122728947	122859374	+	9831	protein_coding	phosphodiesterase 5A, cGMP-specific [Source:MGI Symbol;Acc:MGI:2651499]	-
ENSMUSG00000028005	6.43325	14.8921	5.81856	13.0299	6.8479	4.24202	Gucy1b1	3	82032006	82074689	-	3927	protein_coding	guanylate cyclase 1, soluble, beta 1 [Source:MGI Symbol;Acc:MGI:1860604]	-
ENSMUSG00000087528	0.453987	0.0148586	0.287643	0.029699	0.0813337	0.306433	9830144P21Rik	2	129205958	129230579	-	4889	processed_transcript	RIKEN cDNA 9830144P21 gene [Source:MGI Symbol;Acc:MGI:3041171]	-
ENSMUSG00000022378	6.07756	2.83572	3.66094	3.111	2.67917	2.31411	Fam49b	15	63929097	64060478	-	11412	protein_coding	family with sequence similarity 49, member B [Source:MGI Symbol;Acc:MGI:1923520]	-
ENSMUSG00000029196	4.38	1.78223	1.77109	2.52235	2.71223	2.98169	Tada2b	5	36473670	36484285	-	3791	protein_coding	transcriptional adaptor 2B [Source:MGI Symbol;Acc:MGI:3035274]	MYB
ENSMUSG00000035836	0.700263	0	0	0.495018	0.0312418	0	Ugt2b1	5	86916638	86926530	-	2573	protein_coding	UDP glucuronosyltransferase 2 family, polypeptide B1 [Source:MGI Symbol;Acc:MGI:1919023]	-
ENSMUSG00000020572	26.2471	12.4776	10.9273	13.292	11.1904	11.9847	Nampt	12	32819545	32853349	+	5054	protein_coding	nicotinamide phosphoribosyltransferase [Source:MGI Symbol;Acc:MGI:1929865]	-
ENSMUSG00000020312	0.034779	0.603515	0.646714	0.710776	0.28351	0.170301	Shc2	10	79618051	79637918	-	5426	protein_coding	SHC (Src homology 2 domain containing) transforming protein 2 [Source:MGI Symbol;Acc:MGI:106180]	-
ENSMUSG00000026074	29.3115	12.854	8.08494	8.38858	6.83429	6.10133	Map4k4	1	39900913	40026310	+	9579	protein_coding	mitogen-activated protein kinase kinase kinase kinase 4 [Source:MGI Symbol;Acc:MGI:1349394]	-
ENSMUSG00000085655	3.68931	0.215297	0.883019	0.454095	0.751931	0.966998	Gm15952	3	35933045	35990840	+	956	antisense	predicted gene 15952 [Source:MGI Symbol;Acc:MGI:3802149]	-
ENSMUSG00000108169	1.25356	0.0363606	0	0	0	0.0810306	Gm43958	6	141442360	141445903	+	3544	TEC	predicted gene, 43958 [Source:MGI Symbol;Acc:MGI:5690350]	-
ENSMUSG00000021000	4.47878	2.21458	1.66776	2.08737	2.49703	2.14401	Mia2	12	59095799	59191583	+	11239	protein_coding	melanoma inhibitory activity 2 [Source:MGI Symbol;Acc:MGI:2159614]	-
ENSMUSG00000068141	23.466	9.12766	16.948	9.41043	8.96979	8.50166	Gm10232	17	3044014	3044733	-	720	processed_pseudogene	predicted pseudogene 10232 [Source:MGI Symbol;Acc:MGI:3641637]	-
ENSMUSG00000078238	51.6314	17.5983	27.2527	27.7696	39.2109	32.4449	Gm12854	4	116067268	116067564	+	297	processed_pseudogene	predicted gene 12854 [Source:MGI Symbol;Acc:MGI:3650410]	-
ENSMUSG00000051223	56.0361	30.1251	24.7764	30.0073	27.3759	23.5495	Bzw1	1	58392898	58407353	+	4033	protein_coding	basic leucine zipper and W2 domains 1 [Source:MGI Symbol;Acc:MGI:1914132]	-
ENSMUSG00000077427	9.35177	0	0	0	0	0	Gm24278	9	39537826	39537952	-	127	snoRNA	predicted gene, 24278 [Source:MGI Symbol;Acc:MGI:5454055]	-
ENSMUSG00000114865	0.928226	0.0361258	0.0229465	0.0616816	0.297753	0	Gm29776	14	54692598	54698833	-	2346	protein_coding	predicted gene, 29776 [Source:MGI Symbol;Acc:MGI:5588935]	-
ENSMUSG00000027660	9.14609	3.97928	3.70118	4.32639	3.11044	3.34571	Skil	3	31095058	31122577	+	9694	protein_coding	SKI-like [Source:MGI Symbol;Acc:MGI:106203]	-
ENSMUSG00000021585	7.36944	3.28076	2.89707	3.61677	3.43364	3.7469	Cast	13	74692368	74808810	-	11470	protein_coding	calpastatin [Source:MGI Symbol;Acc:MGI:1098236]	-
ENSMUSG00000092574	0	1.64431	0.98965	0.490942	0.555628	0.0196087	2810047C21Rik1	7	8086326	8093041	-	1179	transcribed_unprocessed_pseudogene	RIKEN cDNA 2810047C21 gene 1 [Source:MGI Symbol;Acc:MGI:1919966]	-
ENSMUSG00000060591	466.714	209.427	146.656	171.192	118.247	122.904	Ifitm2	7	140954837	140955987	-	655	protein_coding	interferon induced transmembrane protein 2 [Source:MGI Symbol;Acc:MGI:1933382]	-
ENSMUSG00000113167	0.703085	0	0.142747	0.0114256	0.0536249	0.259086	Gm48482	12	14128116	14130648	-	2533	TEC	predicted gene, 48482 [Source:MGI Symbol;Acc:MGI:6098000]	-
ENSMUSG00000028402	0.69382	2.15618	1.43438	1.48329	1.15599	1.29507	Mpdz	4	81278500	81442815	-	12437	protein_coding	multiple PDZ domain protein [Source:MGI Symbol;Acc:MGI:1343489]	-
ENSMUSG00000028494	41.9043	21.924	23.3687	21.6912	15.8358	18.7676	Plin2	4	86648386	86670060	-	3512	protein_coding	perilipin 2 [Source:MGI Symbol;Acc:MGI:87920]	-
ENSMUSG00000084320	1.80783	0	0.311169	0	0.0406396	0.245695	Gm14125	2	150305528	150306516	+	989	transcribed_processed_pseudogene	predicted gene 14125 [Source:MGI Symbol;Acc:MGI:3650328]	-
ENSMUSG00000105625	2.19126	0	0	0.401426	0	0	Gm31230	5	87097182	87100395	-	785	unprocessed_pseudogene	predicted gene, 31230 [Source:MGI Symbol;Acc:MGI:5590389]	-
ENSMUSG00000022247	18.7605	8.81263	6.9051	10.488	8.40111	6.79558	Brix1	15	10474779	10485947	-	2731	protein_coding	BRX1, biogenesis of ribosomes [Source:MGI Symbol;Acc:MGI:1915082]	-
ENSMUSG00000022338	12.7928	5.81211	6.54365	6.69179	6.97303	7.47236	Eny2	15	44428042	44438256	+	5763	protein_coding	ENY2 transcription and export complex 2 subunit [Source:MGI Symbol;Acc:MGI:1919286]	-
ENSMUSG00000029578	3.87464	1.70731	2.79668	2.26692	2.62306	2.2547	Wipi2	5	142627698	142670588	+	10543	protein_coding	WD repeat domain, phosphoinositide interacting 2 [Source:MGI Symbol;Acc:MGI:1923831]	-
ENSMUSG00000010362	6.75471	16.2605	15.1161	14.6928	15.9308	19.1792	Rdm1	11	101627195	101636100	+	1575	protein_coding	RAD52 motif 1 [Source:MGI Symbol;Acc:MGI:1913849]	-
ENSMUSG00000104117	0.648752	0	0	0.0632753	0.0209674	0	Gm20743	1	164863133	164936775	+	4171	processed_transcript	predicted gene, 20743 [Source:MGI Symbol;Acc:MGI:5434099]	-
ENSMUSG00000082908	54.0637	15.0606	12.2027	17.3658	23.8061	17.1706	Gm13736	2	87526145	87526397	+	253	processed_pseudogene	predicted gene 13736 [Source:MGI Symbol;Acc:MGI:3650137]	-
ENSMUSG00000070695	0.170808	0	0.117032	0.0610424	0.0062052	0.0383475	Cntnap5a	1	115684756	116587323	+	10945	protein_coding	contactin associated protein-like 5A [Source:MGI Symbol;Acc:MGI:3643623]	-
ENSMUSG00000028800	11.4996	20.3838	20.2491	17.191	16.7997	18.5921	Hdac1	4	129516104	129542713	-	3445	protein_coding	histone deacetylase 1 [Source:MGI Symbol;Acc:MGI:108086]	-
ENSMUSG00000056498	2.9379	0.781349	1.9334	0.66887	3.07519	2.52706	Tmem154	3	84666192	84704575	+	4738	protein_coding	transmembrane protein 154 [Source:MGI Symbol;Acc:MGI:2444725]	-
ENSMUSG00000037197	45.6227	21.2302	20.7441	22.4615	21.1597	23.3646	Rbm17	2	11585437	11604153	-	2405	protein_coding	RNA binding motif protein 17 [Source:MGI Symbol;Acc:MGI:1924188]	-
ENSMUSG00000046329	2.32163	6.05445	7.6114	7.12002	7.35193	8.50896	Slc25a23	17	57043711	57059863	-	5294	protein_coding	solute carrier family 25 (mitochondrial carrier; phosphate carrier), member 23 [Source:MGI Symbol;Acc:MGI:1914222]	-
ENSMUSG00000116056	1.69098	0.0356097	0.493181	0.915381	0.317147	0.46247	Gm4544	15	102657111	102660468	+	1360	lincRNA	predicted gene 4544 [Source:MGI Symbol;Acc:MGI:3782728]	-
ENSMUSG00000056418	0.0667484	1.22024	1.7703	1.73273	0.654015	0.869683	BC043934	9	96435783	96438138	-	2356	lincRNA	cDNA sequence BC043934 [Source:MGI Symbol;Acc:MGI:2679715]	-
ENSMUSG00000028031	0	0.369789	0.627878	0.395758	0.345327	0.621365	Dkk2	3	132085292	132180304	+	3705	protein_coding	dickkopf WNT signaling pathway inhibitor 2 [Source:MGI Symbol;Acc:MGI:1890663]	-
ENSMUSG00000029131	15.884	8.52696	7.37123	10.9839	13.3089	10.6527	Dnajb6	5	29735688	29818134	+	6062	protein_coding	DnaJ heat shock protein family (Hsp40) member B6 [Source:MGI Symbol;Acc:MGI:1344381]	-
ENSMUSG00000030560	34.9716	15.348	14.1198	11.7364	10.432	11.3782	Ctsc	7	88278085	88310888	+	5808	protein_coding	cathepsin C [Source:MGI Symbol;Acc:MGI:109553]	-
ENSMUSG00000049303	1.5152	0.17391	1.76297	0.765774	0.0919929	0.0206499	Syt12	19	4445908	4477447	-	5539	protein_coding	synaptotagmin XII [Source:MGI Symbol;Acc:MGI:2159601]	-
ENSMUSG00000071398	2.01921	6.76278	13.6255	13.0908	31.4798	38.0379	2410004P03Rik	12	17003319	17011727	-	3537	protein_coding	RIKEN cDNA 2410004P03 gene [Source:MGI Symbol;Acc:MGI:1920917]	-
ENSMUSG00000109808	1.53874	0	0.641123	0	0.446065	0	5430402P08Rik	7	111366298	111395608	+	1143	lincRNA	RIKEN cDNA 5430402P08 gene [Source:MGI Symbol;Acc:MGI:1918577]	-
ENSMUSG00000052794	0.0529492	1.07984	2.23512	1.62239	2.95442	2.78551	1700030K09Rik	8	72443880	72461001	+	2970	protein_coding	RIKEN cDNA 1700030K09 gene [Source:MGI Symbol;Acc:MGI:1919504]	-
ENSMUSG00000097812	9.79803	0.496374	3.07176	0.949562	0.151862	0	Gm26812	8	121850194	121860621	+	805	lincRNA	predicted gene, 26812 [Source:MGI Symbol;Acc:MGI:5477306]	-
ENSMUSG00000082474	3.71264	0.0549084	2.19122	0.200233	0.351052	0.633662	Gm8213	6	116195418	116195858	-	441	processed_pseudogene	predicted pseudogene 8213 [Source:MGI Symbol;Acc:MGI:3643597]	-
ENSMUSG00000031467	2.8608	1.27163	2.13077	1.63235	1.45495	1.29616	Agpat5	8	18846277	18891361	+	10783	protein_coding	1-acylglycerol-3-phosphate O-acyltransferase 5 (lysophosphatidic acid acyltransferase, epsilon) [Source:MGI Symbol;Acc:MGI:1196345]	-
ENSMUSG00000031452	1.4066	0.0426013	0.0189418	1.04411	0.144239	0	1700029H14Rik	8	13550733	13562461	-	1421	protein_coding	RIKEN cDNA 1700029H14 gene [Source:MGI Symbol;Acc:MGI:1913751]	-
ENSMUSG00000028007	7.14808	2.94428	3.22038	3.49113	1.50306	1.93804	Snx7	3	117781647	117868936	-	6147	protein_coding	sorting nexin 7 [Source:MGI Symbol;Acc:MGI:1923811]	-
ENSMUSG00000024972	0.0567109	1.02596	1.64434	0.974705	2.05522	2.12836	Lgals12	19	7596660	7607193	-	2773	protein_coding	lectin, galactose binding, soluble 12 [Source:MGI Symbol;Acc:MGI:1929094]	-
ENSMUSG00000035472	0.356883	0	0.378556	0.0415819	0.0329988	0.0381501	Slc25a21	12	56712634	57197472	-	4872	protein_coding	solute carrier family 25 (mitochondrial oxodicarboxylate carrier), member 21 [Source:MGI Symbol;Acc:MGI:2445059]	-
ENSMUSG00000101061	0.524347	0	0.379316	0.11346	0.108941	0	Platr1	1	134435628	134439597	+	3316	lincRNA	pluripotency associated transcript 1 [Source:MGI Symbol;Acc:MGI:5580349]	-
ENSMUSG00000106310	0.601249	0	0.160396	0.27273	0.00471966	0	Gm43523	5	14242462	14245339	+	2878	TEC	predicted gene 43523 [Source:MGI Symbol;Acc:MGI:5663660]	-
ENSMUSG00000061414	0.43662	1.76075	2.20975	1.97995	3.80536	2.25612	Cracr2a	6	127561338	127674248	+	7824	protein_coding	calcium release activated channel regulator 2A [Source:MGI Symbol;Acc:MGI:2685919]	-
ENSMUSG00000028776	14.3313	4.6864	5.15675	5.49176	4.37721	4.17526	Tinagl1	4	130164454	130175122	-	4358	protein_coding	tubulointerstitial nephritis antigen-like 1 [Source:MGI Symbol;Acc:MGI:2137617]	-
ENSMUSG00000072941	19.0312	44.7115	22.5697	31.5565	20.9407	20.8747	Sod3	5	52363791	52371418	+	3738	protein_coding	superoxide dismutase 3, extracellular [Source:MGI Symbol;Acc:MGI:103181]	-
ENSMUSG00000046932	0.25623	0	0.252816	0.279907	0.0058761	0.0083611	Vmn1r193	13	22213672	22223160	-	6840	protein_coding	vomeronasal 1 receptor 193 [Source:MGI Symbol;Acc:MGI:2159695]	-
ENSMUSG00000036782	1.21625	4.83514	3.37752	3.33696	1.92771	2.63305	Klhl13	X	23219271	23365082	-	4253	protein_coding	kelch-like 13 [Source:MGI Symbol;Acc:MGI:1914705]	-
ENSMUSG00000090030	1.04516	0	0.480982	0	0	0	A430072P03Rik	5	107725157	107728801	+	1667	processed_transcript	RIKEN cDNA A430072P03 gene [Source:MGI Symbol;Acc:MGI:3041214]	-
ENSMUSG00000031932	0.621148	0.0142579	0.142638	0.266315	0.0278288	0.0520279	Gpr83	9	14860210	14870789	+	5095	protein_coding	G protein-coupled receptor 83 [Source:MGI Symbol;Acc:MGI:95712]	-
ENSMUSG00000073535	2.49564	0.241506	0.725569	0.0400284	0.163205	0.265669	Gm5532	1	155520173	155527143	-	2206	lincRNA	predicted gene 5532 [Source:MGI Symbol;Acc:MGI:3646828]	-
ENSMUSG00000039824	0	1.12903	0.578915	0.952257	0.412345	1.25664	Myl6b	10	128494157	128498685	-	1847	protein_coding	myosin, light polypeptide 6B [Source:MGI Symbol;Acc:MGI:1917789]	-
ENSMUSG00000096345	2.14493	0	0	0.0465664	0.0327833	0	Esp16	17	39536142	39540847	+	1243	protein_coding	exocrine gland secreted peptide 16 [Source:MGI Symbol;Acc:MGI:3782529]	-
ENSMUSG00000075023	0.627608	0	0.0384381	0.197724	0	0.0663574	Accsl	2	93855361	93869157	-	2801	protein_coding	1-aminocyclopropane-1-carboxylate synthase (non-functional)-like [Source:MGI Symbol;Acc:MGI:3584519]	-
ENSMUSG00000113953	7.66505	0	0	0.23434	0.164978	0	Gm48201	12	12949289	12949535	-	247	processed_pseudogene	predicted gene, 48201 [Source:MGI Symbol;Acc:MGI:6097588]	-
ENSMUSG00000090467	15.3696	2.59137	11.5297	1.8946	0.686068	4.19642	Gm4613	7	25828602	25828877	-	276	processed_pseudogene	predicted gene 4613 [Source:MGI Symbol;Acc:MGI:3782796]	-
ENSMUSG00000116962	2.49001	0.0440666	3.96974	0.973211	0.789284	0.341704	CT010569.1	16	62601383	62602481	+	1099	processed_pseudogene	NSA2 ribosome biogenesis homolog (Nsa2) pseudogene	-
ENSMUSG00000030591	51.5418	25.0807	26.4402	25.3097	21.0796	23.7599	Psmd8	7	29174188	29180701	-	3057	protein_coding	proteasome (prosome, macropain) 26S subunit, non-ATPase, 8 [Source:MGI Symbol;Acc:MGI:1888669]	-
ENSMUSG00000064905	12.3052	0	0	6.10642	0.281067	1.59972	Gm25403	8	65367301	65367443	+	143	misc_RNA	predicted gene, 25403 [Source:MGI Symbol;Acc:MGI:5455180]	-
ENSMUSG00000041202	0.140222	1.95883	3.81308	1.71794	1.91856	1.4708	Pla2g2d	4	138775735	138782046	+	2243	protein_coding	phospholipase A2, group IID [Source:MGI Symbol;Acc:MGI:1341796]	-
ENSMUSG00000034681	25.6732	12.9626	14.3234	13.0457	13.395	14.1095	Rnps1	17	24414675	24425895	+	1920	protein_coding	ribonucleic acid binding protein S1 [Source:MGI Symbol;Acc:MGI:97960]	-
ENSMUSG00000102459	2.56789	0.667776	1.3883	0.869057	0.444202	0.620957	Gm38352	1	153889741	153892297	-	2557	TEC	predicted gene, 38352 [Source:MGI Symbol;Acc:MGI:5611580]	-
ENSMUSG00000109982	0.854654	0	0	0.170996	0	0	Gm45520	8	14065788	14067818	-	2031	TEC	predicted gene 45520 [Source:MGI Symbol;Acc:MGI:5791356]	-
ENSMUSG00000035967	0.636377	4.12316	4.48695	2.8121	7.02332	6.00306	Ints6l	X	56454857	56507843	+	7173	protein_coding	integrator complex subunit 6 like [Source:MGI Symbol;Acc:MGI:2442593]	-
ENSMUSG00000025432	0	0.612109	2.30378	0.880839	0.400966	0.4451	Avil	10	127000709	127020994	+	3398	protein_coding	advillin [Source:MGI Symbol;Acc:MGI:1333798]	-
ENSMUSG00000033177	1.0943	0.0365136	0.0661381	0.112214	0	0.0545052	Tmprss7	16	45656315	45693658	-	2837	protein_coding	transmembrane serine protease 7 [Source:MGI Symbol;Acc:MGI:2686594]	-
ENSMUSG00000106539	1.50923	0	0	0.465207	0.0845586	0.137517	Gm43670	5	49425017	49426783	+	1767	TEC	predicted gene 43670 [Source:MGI Symbol;Acc:MGI:5663807]	-
ENSMUSG00000079705	3.04778	0	0.189767	0.264604	0.0620946	0	Ssxb1	X	8413305	8422157	+	875	protein_coding	synovial sarcoma, X member B1 [Source:MGI Symbol;Acc:MGI:1915235]	-
ENSMUSG00000110872	8.15538	0	0	0.705987	0	0	Gm48255	9	24952973	24953299	+	327	processed_pseudogene	predicted gene, 48255 [Source:MGI Symbol;Acc:MGI:6097670]	-
ENSMUSG00000021413	2.60252	5.44794	4.91567	5.20119	6.14341	6.23413	Prpf4b	13	34875302	34906064	+	8430	protein_coding	pre-mRNA processing factor 4B [Source:MGI Symbol;Acc:MGI:109584]	-
ENSMUSG00000051007	1.86738	5.38261	6.19658	4.91636	6.94101	8.07461	Gatd1	7	141407794	141414136	-	3633	protein_coding	glutamine amidotransferase like class 1 domain containing 1 [Source:MGI Symbol;Acc:MGI:2387178]	-
ENSMUSG00000021252	2.18485	5.73553	5.263	4.90852	4.37185	4.84936	Erg28	12	85815448	85824550	-	4235	protein_coding	ergosterol biosynthesis 28 [Source:MGI Symbol;Acc:MGI:1915571]	-
ENSMUSG00000028980	20.3789	8.20498	6.71989	6.68253	7.15531	7.73996	H6pd	4	149979475	150009023	-	5236	protein_coding	hexose-6-phosphate dehydrogenase (glucose 1-dehydrogenase) [Source:MGI Symbol;Acc:MGI:2140356]	-
ENSMUSG00000098072	3.88854	0.194356	0.339042	0.24376	0	0	Gm26995	5	117935725	117939518	-	1306	antisense	predicted gene, 26995 [Source:MGI Symbol;Acc:MGI:5504110]	-
ENSMUSG00000057835	0.0623426	1.24532	1.66642	2.31126	1.62085	0.953757	Zfp119a	17	55864892	55878930	-	2018	protein_coding	zinc finger protein 119a [Source:MGI Symbol;Acc:MGI:1345189]	zf-C2H2
ENSMUSG00000081000	3.86308	0	0	1.03361	0	0.443776	Gm11200	11	79212796	79213243	+	448	processed_pseudogene	predicted gene 11200 [Source:MGI Symbol;Acc:MGI:3649950]	-
ENSMUSG00000045362	3.57629	0.677487	1.43957	0.975856	0.218051	0.298439	Tnfrsf26	7	143607659	143628722	-	3218	protein_coding	tumor necrosis factor receptor superfamily, member 26 [Source:MGI Symbol;Acc:MGI:2651928]	-
ENSMUSG00000044505	0.945599	0.0465027	0.110767	0.111971	0.137117	0.119813	Lingo4	3	94398517	94404501	+	3645	protein_coding	leucine rich repeat and Ig domain containing 4 [Source:MGI Symbol;Acc:MGI:2444651]	-
ENSMUSG00000112869	5.43759	0	0.111455	0.304702	0.0832144	0	Gm48108	10	88670495	88671269	-	483	processed_pseudogene	predicted gene, 48108 [Source:MGI Symbol;Acc:MGI:6097461]	-
ENSMUSG00000021081	0.541385	0	0	0.0636066	0	0	Serpina1f	12	103688044	103695529	-	3185	protein_coding	serine (or cysteine) peptidase inhibitor, clade A, member 1F [Source:MGI Symbol;Acc:MGI:1915598]	-
ENSMUSG00000026072	7.99958	3.24845	3.04702	4.57893	3.35082	4.16809	Il1r1	1	40225080	40317257	+	6363	protein_coding	interleukin 1 receptor, type I [Source:MGI Symbol;Acc:MGI:96545]	-
ENSMUSG00000028249	64.6403	34.9953	32.4534	37.282	30.1046	30.5826	Sdcbp	4	6365650	6408423	+	6904	protein_coding	syndecan binding protein [Source:MGI Symbol;Acc:MGI:1337026]	-
ENSMUSG00000115204	1.02954	0	0.658009	0.329364	0.0439714	0	Gm36642	15	25528879	25593091	-	1680	lincRNA	predicted gene, 36642 [Source:MGI Symbol;Acc:MGI:5595801]	-
ENSMUSG00000043670	0.0310891	0.976894	2.42153	1.72603	0.0447552	0.0376869	Diras1	10	81019589	81025662	-	3035	protein_coding	DIRAS family, GTP-binding RAS-like 1 [Source:MGI Symbol;Acc:MGI:2183442]	-
ENSMUSG00000103680	6.98282	0.384892	0.529019	0.172885	0.0726952	0	Gm37072	1	161001009	161001845	-	837	TEC	predicted gene, 37072 [Source:MGI Symbol;Acc:MGI:5610300]	-
ENSMUSG00000081434	0.0330377	1.75162	0.224185	0.395203	0.284776	0.448894	Gm14165	2	152353615	152354566	+	952	processed_pseudogene	predicted gene 14165 [Source:MGI Symbol;Acc:MGI:3650537]	-
ENSMUSG00000006205	2.14746	5.74789	4.35442	3.57162	3.6737	7.92897	Htra1	7	130936111	130985660	+	2879	protein_coding	HtrA serine peptidase 1 [Source:MGI Symbol;Acc:MGI:1929076]	-
ENSMUSG00000027361	6.11589	2.28954	2.58364	2.24731	2.37605	2.26407	Gabpb1	2	126627442	126676337	-	7752	protein_coding	GA repeat binding protein, beta 1 [Source:MGI Symbol;Acc:MGI:95611]	-
ENSMUSG00000024948	4.41714	10.1477	10.2569	5.02505	5.64022	5.76432	Map4k2	19	6341135	6355615	+	6646	protein_coding	mitogen-activated protein kinase kinase kinase kinase 2 [Source:MGI Symbol;Acc:MGI:1346883]	-
ENSMUSG00000085816	2.34532	0.0157442	0.0525025	0	0	0	Gm13052	4	142307765	142346475	-	769	lincRNA	predicted gene 13052 [Source:MGI Symbol;Acc:MGI:3651990]	-
ENSMUSG00000108393	0.563152	6.0622	3.00595	5.13178	5.68707	4.5857	Gm32633	7	64001885	64020959	+	720	lincRNA	predicted gene, 32633 [Source:MGI Symbol;Acc:MGI:5591792]	-
ENSMUSG00000096977	0.609952	0	0.343319	0.0806566	0.0277669	0	Gm10827	10	18235053	18246019	+	2895	lincRNA	predicted gene 10827 [Source:MGI Symbol;Acc:MGI:3642321]	-
ENSMUSG00000102466	0.836481	0	0	0.0139432	0	0	Gm38200	3	51557542	51559652	-	2111	TEC	predicted gene, 38200 [Source:MGI Symbol;Acc:MGI:5611428]	-
ENSMUSG00000070531	0	1.3507	1.06872	1.88311	0.020423	0	Wfdc6b	2	164613522	164618212	+	984	protein_coding	WAP four-disulfide core domain 6B [Source:MGI Symbol;Acc:MGI:3575430]	-
ENSMUSG00000100197	5.81221	0	3.59947	0.703427	0	0	Gm28638	2	66125317	66175250	+	288	lincRNA	predicted gene 28638 [Source:MGI Symbol;Acc:MGI:5579344]	-
ENSMUSG00000010914	4.82507	1.71426	2.89189	2.47666	2.65695	1.64957	Pdhx	2	103021075	103073513	-	3930	protein_coding	pyruvate dehydrogenase complex, component X [Source:MGI Symbol;Acc:MGI:1351627]	-
ENSMUSG00000024498	10.4052	4.51839	5.38076	6.23457	5.36689	4.8194	Tcerg1	18	42511510	42575551	+	4246	protein_coding	transcription elongation regulator 1 (CA150) [Source:MGI Symbol;Acc:MGI:1926421]	-
ENSMUSG00000034706	0.503881	2.96173	4.98051	5.17162	12.3028	13.322	Dnaic2	11	114727408	114757889	+	4568	protein_coding	dynein, axonemal, intermediate chain 2 [Source:MGI Symbol;Acc:MGI:2685574]	-
ENSMUSG00000109653	4.40533	0	1.78711	0	0.0698365	1.02217	Gm45608	8	84302963	84303733	-	389	processed_pseudogene	predicted gene 45608 [Source:MGI Symbol;Acc:MGI:5791444]	-
ENSMUSG00000087925	16.2619	0	0	1.40163	0	0	Gm23232	9	114602088	114602192	-	105	snRNA	predicted gene, 23232 [Source:MGI Symbol;Acc:MGI:5453009]	-
ENSMUSG00000061669	4.82345	0	0	0.246656	0	0	Rpl34-ps2	13	116153781	116154134	+	354	processed_pseudogene	ribosomal protein L34, pseudogene 2 [Source:MGI Symbol;Acc:MGI:3648994]	-
ENSMUSG00000036151	0.0165449	1.16589	1.74182	1.7544	5.08045	5.63806	Tm6sf2	8	70072924	70080066	+	1901	protein_coding	transmembrane 6 superfamily member 2 [Source:MGI Symbol;Acc:MGI:1933210]	-
ENSMUSG00000030739	8.44947	17.6769	15.1768	13.1285	36.4154	25.0027	Myh14	7	44605803	44670843	-	7273	protein_coding	myosin, heavy polypeptide 14 [Source:MGI Symbol;Acc:MGI:1919210]	-
ENSMUSG00000030748	15.8393	4.98363	4.60293	3.27569	2.52708	2.38441	Il4ra	7	125552120	125579474	+	6002	protein_coding	interleukin 4 receptor, alpha [Source:MGI Symbol;Acc:MGI:105367]	-
ENSMUSG00000024789	17.7754	6.21807	4.93721	4.99202	6.38865	4.97015	Jak2	19	29251828	29313080	+	5030	protein_coding	Janus kinase 2 [Source:MGI Symbol;Acc:MGI:96629]	-
ENSMUSG00000060890	0	0.640424	1.93299	0.432425	0.00853345	0	Arr3	X	100605497	100618493	+	2355	protein_coding	arrestin 3, retinal [Source:MGI Symbol;Acc:MGI:2159617]	-
ENSMUSG00000033685	65.3513	32.407	33.8775	26.2494	38.9946	41.4748	Ucp2	7	100493337	100502020	+	6989	protein_coding	uncoupling protein 2 (mitochondrial, proton carrier) [Source:MGI Symbol;Acc:MGI:109354]	-
ENSMUSG00000064310	0.431753	0	0.368277	0.139501	0	0.106478	Zpld1	16	55225175	55297986	-	2697	protein_coding	zona pellucida like domain containing 1 [Source:MGI Symbol;Acc:MGI:2443415]	-
ENSMUSG00000000253	2.15	6.20125	8.24192	6.71347	8.88176	11.064	Gmpr	13	45507444	45553800	+	2323	protein_coding	guanosine monophosphate reductase [Source:MGI Symbol;Acc:MGI:1913605]	-
ENSMUSG00000051732	0.774503	0.0213302	1.12957	0.0796749	0	0	Pabpc2	18	39773497	39776082	+	2586	protein_coding	poly(A) binding protein, cytoplasmic 2 [Source:MGI Symbol;Acc:MGI:1349723]	-
ENSMUSG00000094588	0.405611	0	0.040137	0.0485937	0	0	Olfr898	9	38348411	38352919	+	4169	protein_coding	olfactory receptor 898 [Source:MGI Symbol;Acc:MGI:3030732]	-
ENSMUSG00000027702	0.166324	2.29707	4.60506	3.72656	10.9617	12.2888	Lrrc34	3	30624267	30647869	-	1891	protein_coding	leucine rich repeat containing 34 [Source:MGI Symbol;Acc:MGI:1919077]	-
ENSMUSG00000026616	0	0.165116	1.8885	0.198247	0.148724	0.0229126	Cr2	1	195136811	195176716	-	8112	protein_coding	complement receptor 2 [Source:MGI Symbol;Acc:MGI:88489]	-
ENSMUSG00000065954	18.1976	10.1188	7.89691	10.1371	7.1853	5.53438	Tacc1	8	25154552	25256588	-	11920	protein_coding	transforming, acidic coiled-coil containing protein 1 [Source:MGI Symbol;Acc:MGI:2443510]	-
ENSMUSG00000055065	10.323	30.5191	29.621	25.6344	31.7252	30.7359	Ddx17	15	79527736	79546741	-	7643	protein_coding	DEAD (Asp-Glu-Ala-Asp) box polypeptide 17 [Source:MGI Symbol;Acc:MGI:1914290]	-
ENSMUSG00000102901	4.81963	0	0	1.07955	0	0	Ighv5-1	12	113572927	113573402	-	353	IG_V_pseudogene	immunoglobulin heavy variable V5-1 [Source:MGI Symbol;Acc:MGI:5009886]	-
ENSMUSG00000104161	0.813824	0	0.312865	0.155087	0	0	Gm20089	3	51980941	51990075	+	2084	antisense	predicted gene, 20089 [Source:MGI Symbol;Acc:MGI:5012274]	-
ENSMUSG00000040328	1.72719	0.379271	0.0487467	0.256578	0.350485	0.569033	Olfr56	11	48978889	49135387	+	4537	protein_coding	olfactory receptor 56 [Source:MGI Symbol;Acc:MGI:1333785]	-
ENSMUSG00000111982	2.95727	0.061148	0.303037	0.11793	0.17724	0.0446266	Gm35135	12	52475739	52480609	-	990	lincRNA	predicted gene, 35135 [Source:MGI Symbol;Acc:MGI:5594294]	-
ENSMUSG00000097247	1.09135	0.0244985	0.302769	0.264101	0.0206588	0	1500012K07Rik	7	75308696	75331419	+	2630	processed_transcript	RIKEN cDNA 1500012K07 gene [Source:MGI Symbol;Acc:MGI:1916204]	-
ENSMUSG00000025429	2.72825	0.0781116	1.1992	0.518656	0.214215	0	Pstpip2	18	77794545	77882007	+	1395	protein_coding	proline-serine-threonine phosphatase-interacting protein 2 [Source:MGI Symbol;Acc:MGI:1335088]	-
ENSMUSG00000104331	0.375996	0	0.144076	0.0101722	0	0	Gm38284	1	147515726	147520264	+	4539	TEC	predicted gene, 38284 [Source:MGI Symbol;Acc:MGI:5611512]	-
ENSMUSG00000078612	0	0.735333	0.167369	0.175344	0.287948	0.0667236	Fyb2	4	104913456	105016863	+	3136	protein_coding	FYN binding protein 2 [Source:MGI Symbol;Acc:MGI:2685466]	-
ENSMUSG00000032089	6.58479	1.69443	6.04377	2.0196	2.26954	1.49488	Il10ra	9	45253837	45269149	-	3498	protein_coding	interleukin 10 receptor, alpha [Source:MGI Symbol;Acc:MGI:96538]	-
ENSMUSG00000064289	5.69711	2.20934	2.72192	2.8912	2.86919	1.97681	Tank	2	61578585	61654171	+	6096	protein_coding	TRAF family member-associated Nf-kappa B activator [Source:MGI Symbol;Acc:MGI:107676]	-
ENSMUSG00000112657	1.98695	0.163938	2.92076	1.18237	0.356101	0.0484895	BC106175	12	8478874	8482157	-	2064	transcribed_processed_pseudogene	cDNA sequence BC106175 [Source:MGI Symbol;Acc:MGI:3628444]	-
ENSMUSG00000093553	0	0.483473	0.0747149	0.60726	0.187392	0.0505033	Gm20633	3	96243550	96246380	-	2831	antisense	predicted gene 20633 [Source:MGI Symbol;Acc:MGI:5313080]	-
ENSMUSG00000084873	1.45248	0	0.0809339	0.937611	0	0	C030047K22Rik	15	18697684	18818774	-	1164	lincRNA	RIKEN cDNA C030047K22 gene [Source:MGI Symbol;Acc:MGI:1924868]	-
ENSMUSG00000024283	9.96325	5.25212	5.46926	6.50421	5.86256	5.89818	Wac	18	7868832	7973547	+	5962	protein_coding	WW domain containing adaptor with coiled-coil [Source:MGI Symbol;Acc:MGI:2387357]	-
ENSMUSG00000079620	0.0829299	0.871187	2.29178	1.13053	2.55592	3.11936	Muc4	16	32735886	32782391	+	11757	protein_coding	mucin 4 [Source:MGI Symbol;Acc:MGI:2153525]	-
ENSMUSG00000033855	2.44088	0.727265	0.482817	2.08143	1.4082	1.17332	Ston1	17	88597684	88662586	+	4521	protein_coding	stonin 1 [Source:MGI Symbol;Acc:MGI:1924307]	-
ENSMUSG00000089828	1.31706	0	0	0.397097	0.0785624	0	Gm16300	15	47699709	47703827	-	1279	processed_pseudogene	predicted gene 16300 [Source:MGI Symbol;Acc:MGI:3826587]	-
ENSMUSG00000007036	3.04352	8.20828	9.04756	7.61176	13.628	13.6254	Abhd16a	17	35089263	35102987	+	3220	protein_coding	abhydrolase domain containing 16A [Source:MGI Symbol;Acc:MGI:99476]	-
ENSMUSG00000026277	6.99195	13.1927	10.7983	11.0402	13.5757	13.75	Stk25	1	93619751	93658659	-	5812	protein_coding	serine/threonine kinase 25 (yeast) [Source:MGI Symbol;Acc:MGI:1891699]	-
ENSMUSG00000106018	0.531729	0	0.0211739	0	0	0	Gm43527	3	157000417	157003594	+	3178	TEC	predicted gene 43527 [Source:MGI Symbol;Acc:MGI:5663664]	-
ENSMUSG00000060063	37.3089	13.782	7.57662	8.94957	10.6872	8.52145	Alox5ap	5	149264767	149288153	+	1420	protein_coding	arachidonate 5-lipoxygenase activating protein [Source:MGI Symbol;Acc:MGI:107505]	-
ENSMUSG00000040841	0.397463	4.1009	3.77208	4.03168	4.10341	3.79214	Six5	7	19094594	19098549	+	3007	protein_coding	sine oculis-related homeobox 5 [Source:MGI Symbol;Acc:MGI:106220]	Homeobox
ENSMUSG00000001285	3.35756	8.81001	6.60465	8.20828	9.73535	11.4779	Myg1	15	102331709	102338139	+	2823	protein_coding	melanocyte proliferating gene 1 [Source:MGI Symbol;Acc:MGI:1929864]	-
ENSMUSG00000037035	8.91421	2.64264	3.5334	3.28147	5.38004	6.4062	Inhbb	1	119415465	119422248	-	4255	protein_coding	inhibin beta-B [Source:MGI Symbol;Acc:MGI:96571]	-
ENSMUSG00000018168	0.0234338	0.363506	0.83505	0.16346	0.366953	0.371743	Ikzf3	11	98464902	98546031	-	8754	protein_coding	IKAROS family zinc finger 3 [Source:MGI Symbol;Acc:MGI:1342542]	zf-C2H2
ENSMUSG00000022895	26.2455	13.0477	11.581	15.5853	9.59909	7.62761	Ets2	16	95702075	95721051	+	5780	protein_coding	E26 avian leukemia oncogene 2, 3' domain [Source:MGI Symbol;Acc:MGI:95456]	ETS
ENSMUSG00000028811	5.70356	2.67031	2.65571	2.88451	3.73124	3.33462	Yars	4	129189760	129219607	+	5943	protein_coding	tyrosyl-tRNA synthetase [Source:MGI Symbol;Acc:MGI:2147627]	-
ENSMUSG00000117100	1.91919	0	0.0608507	0.0872374	0.0409441	0	CT009580.1	17	58680347	58836041	-	1327	lincRNA	novel transcript	-
ENSMUSG00000098437	26.2554	0	0	0.303445	0	0	Mir195b	2	56785811	56785907	+	97	miRNA	microRNA 195b [Source:MGI Symbol;Acc:MGI:5530873]	-
ENSMUSG00000030541	10.1071	34.3777	34.9024	34	50.1249	47.2739	Idh2	7	80094846	80115392	-	2588	protein_coding	isocitrate dehydrogenase 2 (NADP+), mitochondrial [Source:MGI Symbol;Acc:MGI:96414]	-
ENSMUSG00000090254	0	0.589329	0.991754	0.627247	0.113268	0.108179	Gm1965	6	89140994	89147388	+	2451	lincRNA	predicted gene 1965 [Source:MGI Symbol;Acc:MGI:3584270]	-
ENSMUSG00000086373	1.21502	0	0.824925	0.0410802	0	0	Gm11978	11	6650148	6660233	-	1409	transcribed_processed_pseudogene	predicted gene 11978 [Source:MGI Symbol;Acc:MGI:3650695]	-
ENSMUSG00000106153	0.6942	0	0.580722	0.109948	0	0	Gm43677	5	111158311	111160688	+	2378	TEC	predicted gene 43677 [Source:MGI Symbol;Acc:MGI:5663814]	-
ENSMUSG00000039943	7.74651	3.76971	4.70052	3.03397	4.11595	3.68935	Plcb4	2	135659011	136014593	+	8970	protein_coding	phospholipase C, beta 4 [Source:MGI Symbol;Acc:MGI:107464]	-
ENSMUSG00000057561	41.2095	17.2649	11.7108	14.8302	17.7301	18.2509	Eif1a	18	46597704	46610225	+	2879	protein_coding	eukaryotic translation initiation factor 1A [Source:MGI Symbol;Acc:MGI:95298]	-
ENSMUSG00000100837	1.10227	0	0.733221	0.241578	0.0394302	0	1700063D05Rik	9	41192446	41217990	+	1529	lincRNA	RIKEN cDNA 1700063D05 gene [Source:MGI Symbol;Acc:MGI:1925750]	-
ENSMUSG00000053873	3.19199	0	0	0.164438	0	0	Aym1	5	113357294	113357821	+	528	protein_coding	activator of yeast meiotic promoters 1 [Source:MGI Symbol;Acc:MGI:1891321]	-
ENSMUSG00000067367	22.1465	9.02229	8.65628	7.85222	7.70775	5.86345	Lyar	5	38220470	38234306	+	2401	protein_coding	Ly1 antibody reactive clone [Source:MGI Symbol;Acc:MGI:107470]	-
ENSMUSG00000081487	2.52154	0	3.90962	0.337997	0.0198295	0.0834889	Gm13689	2	80549712	80550396	-	685	processed_pseudogene	predicted gene 13689 [Source:MGI Symbol;Acc:MGI:3652061]	-
ENSMUSG00000004568	1.45365	3.08558	2.82779	2.73605	2.98312	1.90573	Arhgef18	8	3393006	3456601	+	8395	protein_coding	rho/rac guanine nucleotide exchange factor (GEF) 18 [Source:MGI Symbol;Acc:MGI:2142567]	-
ENSMUSG00000029442	1.11369	3.23638	4.44669	3.80528	11.633	11.4784	Wdr66	5	123252102	123327484	+	8961	protein_coding	WD repeat domain 66 [Source:MGI Symbol;Acc:MGI:1918495]	-
ENSMUSG00000034709	18.1503	7.04673	6.96735	4.89028	5.83714	4.4511	Ppp1r21	17	88530118	88588367	+	4255	protein_coding	protein phosphatase 1, regulatory subunit 21 [Source:MGI Symbol;Acc:MGI:1921075]	-
ENSMUSG00000084844	0	0.307779	0.187676	0.267413	0.146652	0.412375	Hoxb3os	11	96343072	96354691	-	4201	antisense	homeobox B3 and homeobox B2, opposite strand [Source:MGI Symbol;Acc:MGI:103211]	-
ENSMUSG00000009772	4.47455	0.908391	1.83156	1.42987	1.4945	0.848474	Nuak2	1	132316126	132333488	+	3920	protein_coding	NUAK family, SNF1-like kinase, 2 [Source:MGI Symbol;Acc:MGI:1921387]	-
ENSMUSG00000025059	5.01384	1.61577	1.06258	1.42604	1.46811	1.84016	Gk	X	85701937	85776819	-	7743	protein_coding	glycerol kinase [Source:MGI Symbol;Acc:MGI:106594]	-
ENSMUSG00000069515	237.13	110.332	118.574	93.3694	17.159	19.2296	Lyz1	10	117287797	117292868	-	1263	protein_coding	lysozyme 1 [Source:MGI Symbol;Acc:MGI:96902]	-
ENSMUSG00000025082	0.572177	0.00897059	0.0808949	0.0786246	0	0	Vwa2	19	56874249	56912078	+	4049	protein_coding	von Willebrand factor A domain containing 2 [Source:MGI Symbol;Acc:MGI:2684334]	-
ENSMUSG00000000787	79.4466	37.6204	27.4483	39.7649	40.4678	32.6276	Ddx3x	X	13280970	13294052	+	5277	protein_coding	DEAD/H (Asp-Glu-Ala-Asp/His) box polypeptide 3, X-linked [Source:MGI Symbol;Acc:MGI:103064]	-
ENSMUSG00000051427	0.977447	3.33919	3.37671	4.25486	10.0826	12.4176	Ccdc157	11	4141123	4160293	-	5589	protein_coding	coiled-coil domain containing 157 [Source:MGI Symbol;Acc:MGI:3041210]	-
ENSMUSG00000022667	2.49539	0.523411	0.548368	0.661994	0.423023	0.688215	Cd200r1	16	44765736	44794978	+	3348	protein_coding	CD200 receptor 1 [Source:MGI Symbol;Acc:MGI:1889024]	-
ENSMUSG00000069299	0.197555	0	0	0	0	0	Vmn1r188	13	22084440	22095916	+	8473	protein_coding	vomeronasal 1 receptor 188 [Source:MGI Symbol;Acc:MGI:2182259]	-
ENSMUSG00000112716	0.915049	0.00629605	0.0940142	0.152038	0.0282542	0	4930471E19Rik	10	120632672	120699203	-	1923	lincRNA	RIKEN cDNA 4930471E19 gene [Source:MGI Symbol;Acc:MGI:1922162]	-
ENSMUSG00000075705	87.9988	38.1518	62.077	31.3568	34.0663	36.3452	Msrb1	17	24736642	24742778	+	1258	protein_coding	methionine sulfoxide reductase B1 [Source:MGI Symbol;Acc:MGI:1351642]	-
ENSMUSG00000020224	49.0687	21.1513	17.5456	17.8382	22.0533	17.1041	Llph	10	120227070	120232582	+	2181	protein_coding	LLP homolog, long-term synaptic facilitation (Aplysia) [Source:MGI Symbol;Acc:MGI:1913475]	-
ENSMUSG00000096349	10.3844	0	0.469125	0.17647	0.662595	0	Gm22513	12	54696782	54696945	+	164	snRNA	predicted gene, 22513 [Source:MGI Symbol;Acc:MGI:5452290]	-
ENSMUSG00000078921	8.18396	3.52875	5.44554	5.86285	3.68423	6.44754	Tgtp2	11	49057194	49064206	-	2938	protein_coding	T cell specific GTPase 2 [Source:MGI Symbol;Acc:MGI:3710083]	-
ENSMUSG00000021546	79.833	45.8656	44.9142	48.6046	45.6858	49.3561	Hnrnpk	13	58391142	58403343	-	6466	protein_coding	heterogeneous nuclear ribonucleoprotein K [Source:MGI Symbol;Acc:MGI:99894]	-
ENSMUSG00000027775	3.07801	8.81029	9.44954	7.59677	10.9728	10.8163	Mfsd1	3	67582741	67604237	+	3042	protein_coding	major facilitator superfamily domain containing 1 [Source:MGI Symbol;Acc:MGI:1914118]	-
ENSMUSG00000086828	2.32926	0.0159938	0.965518	0.498308	0.789285	0.151096	Gm15579	7	143600134	143601299	+	757	antisense	predicted gene 15579 [Source:MGI Symbol;Acc:MGI:3783027]	-
ENSMUSG00000044702	0.543927	0.040638	0.442563	0.2034	0.177628	0.109034	Palb2	7	122107262	122132985	-	7342	protein_coding	partner and localizer of BRCA2 [Source:MGI Symbol;Acc:MGI:3040695]	-
ENSMUSG00000015342	0.00619619	0.286616	0.731999	0.236715	0.359919	0.668228	Xk	X	9272756	9313250	+	5076	protein_coding	X-linked Kx blood group [Source:MGI Symbol;Acc:MGI:103569]	-
ENSMUSG00000050241	0	0.385336	0.11228	0.099679	0.246078	0.275901	Klre1	6	129577905	129585827	+	3494	protein_coding	killer cell lectin-like receptor family E member 1 [Source:MGI Symbol;Acc:MGI:2662547]	-
ENSMUSG00000016918	0.349444	1.00176	1.3574	1.26691	1.55016	4.00391	Sulf1	1	12692277	12861192	+	11294	protein_coding	sulfatase 1 [Source:MGI Symbol;Acc:MGI:2138563]	-
ENSMUSG00000082193	4.32487	0.538586	0.253783	0.430879	0.931353	0.135424	Rpl5-ps1	1	14865072	14865965	+	894	processed_pseudogene	ribosomal protein L5, pseudogene 1 [Source:MGI Symbol;Acc:MGI:3647110]	-
ENSMUSG00000046650	0.329475	0	0.020473	0.0667482	0.0097085	0.00751609	Olfr1440	19	12387279	12401584	+	7609	protein_coding	olfactory receptor 1440 [Source:MGI Symbol;Acc:MGI:3031274]	-
ENSMUSG00000026840	0.657865	1.92329	1.95784	1.90692	1.25592	0.766259	Lamc3	2	31887291	31946539	+	6091	protein_coding	laminin gamma 3 [Source:MGI Symbol;Acc:MGI:1344394]	-
ENSMUSG00000035051	1.25131	3.7112	3.21692	2.23613	3.29882	3.06409	Dhx57	17	80238304	80290476	-	5077	protein_coding	DEAH (Asp-Glu-Ala-Asp/His) box polypeptide 57 [Source:MGI Symbol;Acc:MGI:2147067]	-
ENSMUSG00000071324	0.0784826	0.838711	1.23079	1.0775	2.61368	2.38906	Armc2	10	41914990	42018442	-	7188	protein_coding	armadillo repeat containing 2 [Source:MGI Symbol;Acc:MGI:1916449]	-
ENSMUSG00000066258	2.57052	6.00572	7.05226	4.8573	4.80929	3.86915	Trim12a	7	104299894	104315466	-	5781	protein_coding	tripartite motif-containing 12A [Source:MGI Symbol;Acc:MGI:1923931]	-
ENSMUSG00000114359	4.70288	0.0329003	1.64114	1.97012	0.816996	0.621629	Gm47816	13	55253225	55254401	-	368	processed_pseudogene	predicted gene, 47816 [Source:MGI Symbol;Acc:MGI:6097003]	-
ENSMUSG00000057948	2.92344	6.21268	6.47977	5.54585	7.02518	6.54707	Unc13d	11	116062095	116077961	-	4679	protein_coding	unc-13 homolog D [Source:MGI Symbol;Acc:MGI:1917700]	-
ENSMUSG00000108602	2.1288	0	0	0	0	0	Klk1b10-ps	7	43987793	43992085	+	783	unprocessed_pseudogene	kallikrein 1-related peptidase b10, pseudogene [Source:MGI Symbol;Acc:MGI:892026]	-
ENSMUSG00000022204	34.4564	18.1857	22.4634	23.8136	18.6016	23.0243	Ngdn	14	55015454	55024137	+	1483	protein_coding	neuroguidin, EIF4E binding protein [Source:MGI Symbol;Acc:MGI:1916216]	-
ENSMUSG00000015478	0.657456	6.47251	2.99269	6.24714	6.50729	7.85438	Rnf5	17	34601091	34603690	-	1483	protein_coding	ring finger protein 5 [Source:MGI Symbol;Acc:MGI:1860076]	-
ENSMUSG00000028850	5.50795	1.11793	2.22875	1.06364	1.67929	2.04594	Gpatch3	4	133574745	133584243	+	2086	protein_coding	G patch domain containing 3 [Source:MGI Symbol;Acc:MGI:2442492]	-
ENSMUSG00000050587	1.34194	0.174493	0.559871	0.584561	0.121242	0.0820281	Lrrc4c	2	96318169	97631666	+	4626	protein_coding	leucine rich repeat containing 4C [Source:MGI Symbol;Acc:MGI:2442636]	-
ENSMUSG00000084196	9.56758	1.16808	1.80208	1.86743	0.446105	0.375766	Gm12874	4	122592984	122594068	+	913	processed_pseudogene	predicted gene 12874 [Source:MGI Symbol;Acc:MGI:3651901]	-
ENSMUSG00000111898	2.9069	0	0	0.20168	0	0	Gm48608	12	6005667	6006240	+	574	processed_pseudogene	predicted gene, 48608 [Source:MGI Symbol;Acc:MGI:6098194]	-
ENSMUSG00000102037	24.3082	7.56346	11.6242	5.42367	3.21919	4.93457	Bcl2a1a	9	88956900	88962419	+	819	protein_coding	B cell leukemia/lymphoma 2 related protein A1a [Source:MGI Symbol;Acc:MGI:102687]	-
ENSMUSG00000102365	0.969892	0.0497065	0.479288	0.071503	0	0	Gm37045	1	138960441	138962903	-	2463	TEC	predicted gene, 37045 [Source:MGI Symbol;Acc:MGI:5610273]	-
ENSMUSG00000021098	0.231841	0.00404859	0.850191	0.193965	0.0777243	0.0332405	4930447C04Rik	12	72881109	72940774	-	5981	protein_coding	RIKEN cDNA 4930447C04 gene [Source:MGI Symbol;Acc:MGI:1923051]	-
ENSMUSG00000079003	3.56114	9.61681	12.6818	6.20953	5.4126	9.58836	Samd1	8	83997672	84000409	+	2393	protein_coding	sterile alpha motif domain containing 1 [Source:MGI Symbol;Acc:MGI:2142433]	-
ENSMUSG00000024286	38.6244	18.1043	15.2266	13.8999	12.0786	10.3982	Ccny	18	9314044	9450150	-	4017	protein_coding	cyclin Y [Source:MGI Symbol;Acc:MGI:1915224]	-
ENSMUSG00000104710	1.42491	0	0.764747	1.0586	0	0.0123467	Gm31243	3	135904344	136167184	+	1158	antisense	predicted gene, 31243 [Source:MGI Symbol;Acc:MGI:5590402]	-
ENSMUSG00000090136	70.2456	27.0197	41.5027	29.4849	20.8351	24.7703	Gm10177	9	37252922	37253365	+	444	transcribed_processed_pseudogene	predicted gene 10177 [Source:MGI Symbol;Acc:MGI:3704330]	-
ENSMUSG00000002028	1.0737	2.18321	2.58253	1.72685	1.94148	2.29231	Kmt2a	9	44803355	44881296	-	16670	protein_coding	lysine (K)-specific methyltransferase 2A [Source:MGI Symbol;Acc:MGI:96995]	-
ENSMUSG00000041556	0.0976766	1.90515	1.63737	2.22688	3.91879	7.8197	Fbxo2	4	148160621	148166424	+	1288	protein_coding	F-box protein 2 [Source:MGI Symbol;Acc:MGI:2446216]	-
ENSMUSG00000003379	1.07136	8.33817	44.7812	6.05504	5.35336	1.83228	Cd79a	7	24897381	24902197	+	1457	protein_coding	CD79A antigen (immunoglobulin-associated alpha) [Source:MGI Symbol;Acc:MGI:101774]	-
ENSMUSG00000041313	1.77128	0.629896	0.47513	0.717545	0.490564	0.564245	Slc7a1	5	148327410	148399904	-	11530	protein_coding	solute carrier family 7 (cationic amino acid transporter, y+ system), member 1 [Source:MGI Symbol;Acc:MGI:88117]	-
ENSMUSG00000108543	0.945816	0	0.038408	0.165188	0	0	Gm44735	7	126938886	126940637	+	1752	TEC	predicted gene 44735 [Source:MGI Symbol;Acc:MGI:5753311]	-
ENSMUSG00000074643	1.20507	0.062687	0.109852	0.227045	0.0222945	0.0735196	Cpne1	2	156071842	156111965	-	4507	protein_coding	copine I [Source:MGI Symbol;Acc:MGI:2386621]	-
ENSMUSG00000099724	0.51839	0	0	0.0917016	0	0	4930554C24Rik	9	84774398	84857691	+	3156	lincRNA	RIKEN cDNA 4930554C24 gene [Source:MGI Symbol;Acc:MGI:1922503]	-
ENSMUSG00000035864	0.520748	0.0459481	0.064563	0.0591249	0.0332957	0	Syt1	10	108497650	109010982	-	8338	protein_coding	synaptotagmin I [Source:MGI Symbol;Acc:MGI:99667]	-
ENSMUSG00000021697	0	0.390222	0.348263	0.278365	0.105785	0	Depdc1b	13	108316332	108407782	+	3350	protein_coding	DEP domain containing 1B [Source:MGI Symbol;Acc:MGI:2145425]	-
ENSMUSG00000092518	0.593184	0	0.443204	0.21148	0	0.0416836	Fam71e2	7	4753226	4771302	-	2744	protein_coding	family with sequence similarity 71, member E2 [Source:MGI Symbol;Acc:MGI:3045311]	-
ENSMUSG00000087685	2.33478	0	1.9782	0.734751	0	0	1700122E12Rik	8	84847188	84848415	+	709	processed_transcript	RIKEN cDNA 1700122E12 gene [Source:MGI Symbol;Acc:MGI:1920869]	-
ENSMUSG00000071561	2.09539	0	0.0851782	0.109903	0	0	BC100530	16	36359382	36367748	-	790	protein_coding	cDNA sequence BC100530 [Source:MGI Symbol;Acc:MGI:3696883]	-
ENSMUSG00000033021	3.96802	9.46956	11.5278	9.89706	12.4336	12.3464	Gmppa	1	75435930	75443179	+	2395	protein_coding	GDP-mannose pyrophosphorylase A [Source:MGI Symbol;Acc:MGI:1916330]	-
ENSMUSG00000091401	0	1.3857	0.0597522	0.633834	0.025089	0	Gm9252	7	41666517	41668118	-	1602	processed_pseudogene	predicted gene 9252 [Source:MGI Symbol;Acc:MGI:3645130]	-
ENSMUSG00000030199	6.30324	2.06357	3.29367	2.54674	1.73799	1.86049	Etv6	6	134035700	134270158	+	5983	protein_coding	ets variant 6 [Source:MGI Symbol;Acc:MGI:109336]	ETS
ENSMUSG00000029607	1.18733	0.0259702	0.0346413	0.285561	0.0610661	0.0184009	Ankrd61	5	143890741	143897685	-	2331	protein_coding	ankyrin repeat domain 61 [Source:MGI Symbol;Acc:MGI:1913979]	-
ENSMUSG00000023307	31.2244	14.4507	14.3159	16.5418	20.0136	19.0831	March5	19	37207543	37222139	+	2396	protein_coding	membrane-associated ring finger (C3HC4) 5 [Source:MGI Symbol;Acc:MGI:1915207]	-
ENSMUSG00000090957	1.97302	0.0885734	0.13096	0.749578	0.158641	0.117606	Gm7535	17	17911040	17912816	-	1777	processed_pseudogene	predicted gene 7535 [Source:MGI Symbol;Acc:MGI:3644434]	-
ENSMUSG00000092277	0	0.796103	0.323507	0.146166	0.357728	0.244419	Gm19684	17	36121678	36129692	+	1611	protein_coding	predicted gene, 19684 [Source:MGI Symbol;Acc:MGI:5011869]	-
ENSMUSG00000064394	23.0578	0	0	2.20069	3.45311	0	Gm23622	14	75651423	75651529	-	107	snRNA	predicted gene, 23622 [Source:MGI Symbol;Acc:MGI:5453399]	-
ENSMUSG00000104210	0.660912	0	0.0618295	0.0155055	0	0	Gm37984	1	180473355	180477087	-	3733	TEC	predicted gene, 37984 [Source:MGI Symbol;Acc:MGI:5611212]	-
ENSMUSG00000102930	0.834793	0.0100351	0.0223094	0	0.0112583	0.0183093	Gm38115	1	36913601	36916539	-	2413	sense_intronic	predicted gene, 38115 [Source:MGI Symbol;Acc:MGI:5611343]	-
ENSMUSG00000034343	6.51652	3.14843	3.70362	3.4739	2.80756	3.86235	Ube2f	1	91250304	91290337	+	8842	protein_coding	ubiquitin-conjugating enzyme E2F (putative) [Source:MGI Symbol;Acc:MGI:1915171]	-
ENSMUSG00000041920	1.05581	0.225571	1.20063	0.505304	0.392225	0.460615	Slc16a6	11	109450855	109473598	-	4883	protein_coding	solute carrier family 16 (monocarboxylic acid transporters), member 6 [Source:MGI Symbol;Acc:MGI:2144585]	-
ENSMUSG00000029438	0.398014	1.24064	1.6326	0.782697	2.276	2.11089	Bcl7a	5	123343834	123374992	+	9490	protein_coding	B cell CLL/lymphoma 7A [Source:MGI Symbol;Acc:MGI:1924295]	-
ENSMUSG00000032575	25.4506	13.4886	15.8991	17.9559	15.1462	18.575	Manf	9	106838312	106891979	-	3524	protein_coding	mesencephalic astrocyte-derived neurotrophic factor [Source:MGI Symbol;Acc:MGI:1922090]	-
ENSMUSG00000056008	0	1.20965	0.836619	0.689249	0.144454	0	Gm11541	11	94694498	94704499	-	1681	protein_coding	predicted gene 11541 [Source:MGI Symbol;Acc:MGI:3650066]	-
ENSMUSG00000112820	0.744837	0	0	0.290422	0	0	Gm48298	10	105806538	105808867	-	2330	TEC	predicted gene, 48298 [Source:MGI Symbol;Acc:MGI:6097740]	-
ENSMUSG00000030365	0	0.598776	1.60265	0.671001	0.744739	0.29157	Clec2i	6	128887588	128898167	+	3110	protein_coding	C-type lectin domain family 2, member i [Source:MGI Symbol;Acc:MGI:2136650]	-
ENSMUSG00000028989	0	0.713832	0.424272	0.0677722	0.330219	1.1519	Angptl7	4	148495183	148500460	-	2157	protein_coding	angiopoietin-like 7 [Source:MGI Symbol;Acc:MGI:3605801]	-
ENSMUSG00000102051	7.13109	0.470334	0.16626	0.675411	0.340431	0.215	I830127L07Rik	15	75131377	75135128	-	798	transcribed_unprocessed_pseudogene	RIKEN cDNA I830127L07 gene [Source:MGI Symbol;Acc:MGI:3612406]	-
ENSMUSG00000025351	96.5001	47.3121	48.8547	42.8201	49.6438	48.5174	Cd63	10	128900989	128912822	+	3682	protein_coding	CD63 antigen [Source:MGI Symbol;Acc:MGI:99529]	-
ENSMUSG00000021133	12.8022	5.02798	4.48143	4.59461	4.34876	4.72807	Susd6	12	80790510	80880835	+	7615	protein_coding	sushi domain containing 6 [Source:MGI Symbol;Acc:MGI:2444661]	-
ENSMUSG00000049252	0.0687342	0	0.0838121	0.0535629	0	0.00300696	Lrp1b	2	40595246	42653624	-	23774	protein_coding	low density lipoprotein-related protein 1B (deleted in tumors) [Source:MGI Symbol;Acc:MGI:2151136]	-
ENSMUSG00000024530	0	0.646971	1.33662	0.414698	0.124733	0.598831	Prelid3a	18	67464849	67480581	+	2167	protein_coding	PRELI domain containing 3A [Source:MGI Symbol;Acc:MGI:2442865]	-
ENSMUSG00000043496	0.365661	2.07054	0.606027	1.4085	1.29501	0.569251	Tril	6	53815468	53820830	-	5363	protein_coding	TLR4 interactor with leucine-rich repeats [Source:MGI Symbol;Acc:MGI:1914123]	-
ENSMUSG00000031605	6.80907	3.11907	2.64865	2.58459	2.13379	1.94642	Klhl2	8	64739675	64850017	-	9247	protein_coding	kelch-like 2, Mayven [Source:MGI Symbol;Acc:MGI:1924363]	-
ENSMUSG00000046768	24.4938	11.8199	8.95522	12.4219	6.19168	7.81475	Rhoj	12	75308322	75401456	+	6484	protein_coding	ras homolog family member J [Source:MGI Symbol;Acc:MGI:1931551]	-
ENSMUSG00000078954	6.2427	1.302	0.955388	1.17052	2.1946	1.81453	Arhgap8	15	84720052	84772207	+	3546	protein_coding	Rho GTPase activating protein 8 [Source:MGI Symbol;Acc:MGI:1920417]	-
ENSMUSG00000042286	1.24846	3.45118	1.81605	1.97831	1.7642	1.48943	Stab1	14	31139013	31168641	-	10288	protein_coding	stabilin 1 [Source:MGI Symbol;Acc:MGI:2178742]	-
ENSMUSG00000056220	0.852963	2.13232	2.10933	2.17573	3.20343	4.12034	Pla2g4a	1	149829618	149961290	-	6391	protein_coding	phospholipase A2, group IVA (cytosolic, calcium-dependent) [Source:MGI Symbol;Acc:MGI:1195256]	-
ENSMUSG00000042962	0.244571	4.85289	0.639944	1.79213	1.10216	0.411048	Gm5436	12	84258331	84258973	-	643	processed_pseudogene	predicted pseudogene 5436 [Source:MGI Symbol;Acc:MGI:3643291]	-
ENSMUSG00000030760	2.66143	1.18838	1.55645	1.21916	1.39571	1.47854	Acer3	7	98206389	98321208	-	15324	protein_coding	alkaline ceramidase 3 [Source:MGI Symbol;Acc:MGI:1913440]	-
ENSMUSG00000103722	0.758838	0	0.0746753	0.666991	0.0125615	0.0749051	2700078F05Rik	1	181950132	181953375	-	3244	TEC	RIKEN cDNA 2700078F05 gene [Source:MGI Symbol;Acc:MGI:1919876]	-
ENSMUSG00000055239	20.2963	9.72376	11.0271	10.0529	8.45678	10.4157	Kcmf1	6	72841114	72899979	-	6325	protein_coding	potassium channel modulatory factor 1 [Source:MGI Symbol;Acc:MGI:1921537]	-
ENSMUSG00000086822	0.00522803	0.351592	0.404629	0.491352	1.3829	1.56471	5330413P13Rik	2	131820006	131847683	-	6016	lincRNA	RIKEN cDNA 5330413P13 gene [Source:MGI Symbol;Acc:MGI:3041161]	-
ENSMUSG00000065852	12.1452	0	0	0.212802	0	0	Gm22353	15	38058285	38058420	+	136	snoRNA	predicted gene, 22353 [Source:MGI Symbol;Acc:MGI:5452130]	-
ENSMUSG00000011034	2.50944	0.522222	1.16698	0.700335	1.09099	0.641566	Slc5a1	5	33104219	33162870	+	4104	protein_coding	solute carrier family 5 (sodium/glucose cotransporter), member 1 [Source:MGI Symbol;Acc:MGI:107678]	-
ENSMUSG00000059824	1.58807	0.357052	3.51366	0.707526	18.3323	6.50183	Dbp	7	45705088	45710203	+	2993	protein_coding	D site albumin promoter binding protein [Source:MGI Symbol;Acc:MGI:94866]	TF_bZIP
ENSMUSG00000045518	0.0131708	0.438434	1.71368	0.648291	0	0	Onecut3	10	80494835	80517276	+	4776	protein_coding	one cut domain, family member 3 [Source:MGI Symbol;Acc:MGI:1891409]	CUT
ENSMUSG00000071068	2.40482	0.667963	2.34624	2.07658	1.68989	1.89451	Treml2	17	48299498	48312533	+	4917	protein_coding	triggering receptor expressed on myeloid cells-like 2 [Source:MGI Symbol;Acc:MGI:2147038]	-
ENSMUSG00000030346	0.643569	0.0301865	0.0363507	0.295658	0.0688017	0.181772	Rad51ap1	6	126923050	126939587	-	4813	protein_coding	RAD51 associated protein 1 [Source:MGI Symbol;Acc:MGI:1098224]	-
ENSMUSG00000066361	7.30001	1.6992	0.74655	1.82324	0.439916	0.760273	Serpina3c	12	104146382	104153870	-	2213	protein_coding	serine (or cysteine) peptidase inhibitor, clade A, member 3C [Source:MGI Symbol;Acc:MGI:102848]	-
ENSMUSG00000097335	0.46824	0.00338287	0.0827268	0.0323454	0.0265667	0.0279638	Gm26563	11	80017354	80029868	-	3579	lincRNA	predicted gene, 26563 [Source:MGI Symbol;Acc:MGI:5477057]	-
ENSMUSG00000015627	0.345519	3.36322	1.2619	2.50546	2.54899	4.52726	Gata5	2	180325133	180334699	-	3277	protein_coding	GATA binding protein 5 [Source:MGI Symbol;Acc:MGI:109497]	zf-GATA
ENSMUSG00000033857	0.163812	1.61134	2.3607	1.46078	3.18406	2.62405	Engase	11	118476829	118489209	+	5184	protein_coding	endo-beta-N-acetylglucosaminidase [Source:MGI Symbol;Acc:MGI:2443788]	-
ENSMUSG00000022663	20.6564	11.3839	12.0661	12.8356	13.8777	11.4509	Atg3	16	45158785	45188538	+	3154	protein_coding	autophagy related 3 [Source:MGI Symbol;Acc:MGI:1915091]	-
ENSMUSG00000004677	2.88708	5.84436	7.1259	4.14255	6.02018	5.55672	Myo9b	8	71272714	71360713	+	7496	protein_coding	myosin IXb [Source:MGI Symbol;Acc:MGI:106624]	-
ENSMUSG00000034160	3.32233	9.518	13.1567	10.8992	15.3756	18.3676	Ogt	X	101640060	101684351	+	8045	protein_coding	O-linked N-acetylglucosamine (GlcNAc) transferase (UDP-N-acetylglucosamine:polypeptide-N-acetylglucosaminyl transferase) [Source:MGI Symbol;Acc:MGI:1339639]	-
ENSMUSG00000106107	1.26005	0.020417	0.789461	0.686012	0.0454987	0	Gm43190	3	98447198	98448976	-	1779	sense_intronic	predicted gene 43190 [Source:MGI Symbol;Acc:MGI:5663327]	-
ENSMUSG00000115919	0.682618	0	0	0.0325546	0	0	Gm31583	16	24085083	24090089	-	3556	lincRNA	predicted gene, 31583 [Source:MGI Symbol;Acc:MGI:5590742]	-
ENSMUSG00000097924	1.76213	0.406299	1.27329	0.826344	1.1097	1.19948	A730020E08Rik	6	61172293	61180810	-	3895	bidirectional_promoter_lncRNA	RIKEN cDNA A730020E08 gene [Source:MGI Symbol;Acc:MGI:2444999]	-
ENSMUSG00000019373	6.47884	2.32361	2.63174	2.76563	3.08335	2.69609	Cops3	11	59817795	59839838	-	3454	protein_coding	COP9 signalosome subunit 3 [Source:MGI Symbol;Acc:MGI:1349409]	-
ENSMUSG00000022615	0.914716	5.16541	11.2969	8.11074	22.4037	22.5198	Tymp	15	89371931	89377039	-	2037	protein_coding	thymidine phosphorylase [Source:MGI Symbol;Acc:MGI:1920212]	-
ENSMUSG00000056035	0.59411	0.00475449	0.445571	0.0231174	0	0.0168437	Cyp3a11	5	145854426	145879964	-	5093	protein_coding	cytochrome P450, family 3, subfamily a, polypeptide 11 [Source:MGI Symbol;Acc:MGI:88609]	-
ENSMUSG00000089811	3.68551	0.029494	0.0327848	0.176255	0	0	Gm16138	15	37331989	37332809	-	821	processed_pseudogene	predicted gene 16138 [Source:MGI Symbol;Acc:MGI:3801879]	-
ENSMUSG00000017466	31.7463	62.6637	38.4921	61.3565	35.4524	49.4504	Timp2	11	118301069	118355740	-	3896	protein_coding	tissue inhibitor of metalloproteinase 2 [Source:MGI Symbol;Acc:MGI:98753]	-
ENSMUSG00000033352	12.9765	6.33885	5.07971	6.46468	5.0253	6.83499	Map2k4	11	65688243	65788297	-	4664	protein_coding	mitogen-activated protein kinase kinase 4 [Source:MGI Symbol;Acc:MGI:1346869]	-
ENSMUSG00000027304	10.5031	5.42025	5.91507	6.94595	4.51111	4.48035	Rtf1	2	119675068	119735407	+	5731	protein_coding	RTF1, Paf1/RNA polymerase II complex component [Source:MGI Symbol;Acc:MGI:1309480]	-
ENSMUSG00000116763	0.794415	0.00561824	0.160656	0.0402891	0.10258	0.0464419	AC034116.3	16	91138455	91159089	-	2155	lincRNA	novel transcript	-
ENSMUSG00000082000	3.22695	0	2.24535	0.405986	0.0816625	0.200566	Gm12488	3	100955441	100955939	+	499	processed_pseudogene	predicted gene 12488 [Source:MGI Symbol;Acc:MGI:3650947]	-
ENSMUSG00000072966	0	0.290056	0.329958	0.407316	0.458202	0.135402	Gprasp2	X	135839034	135844730	+	4540	protein_coding	G protein-coupled receptor associated sorting protein 2 [Source:MGI Symbol;Acc:MGI:2442071]	-
ENSMUSG00000036281	0.122975	1.00625	1.60175	0.745059	2.83506	2.19133	Snapc4	2	26362765	26380653	-	6622	protein_coding	small nuclear RNA activating complex, polypeptide 4 [Source:MGI Symbol;Acc:MGI:2443935]	MYB
ENSMUSG00000107207	0.765375	0	0.163927	0.0970895	0.0190306	0.33717	Gm42897	5	130896502	130898613	-	2112	TEC	predicted gene 42897 [Source:MGI Symbol;Acc:MGI:5663034]	-
ENSMUSG00000089645	0.817639	0	0.528153	0.102472	0	0.0072319	Gm5766	16	4229230	4231206	+	1977	transcribed_processed_pseudogene	predicted gene 5766 [Source:MGI Symbol;Acc:MGI:3643508]	-
ENSMUSG00000054568	0.634822	0	0.30342	0.674809	0	0.0748538	Usp17la	7	104857009	104862667	+	2656	protein_coding	ubiquitin specific peptidase 17-like A [Source:MGI Symbol;Acc:MGI:107699]	-
ENSMUSG00000037447	2.28913	0.916305	1.09065	0.633268	0.852614	0.639132	Arid5a	1	36307733	36324029	+	12540	protein_coding	AT rich interactive domain 5A (MRF1-like) [Source:MGI Symbol;Acc:MGI:2443039]	ARID
ENSMUSG00000074346	1.17978	0	0.0568637	0.427805	0.128864	0	Kcnd3os	3	105441595	105452955	-	1353	antisense	potassium voltage-gated channel, Shal-related family, member 3, opposite strand [Source:MGI Symbol;Acc:MGI:1925885]	-
ENSMUSG00000028389	2.58849	0.830458	1.16758	1.42518	1.79527	0.518738	Zfp37	4	62189540	62231047	-	4086	protein_coding	zinc finger protein 37 [Source:MGI Symbol;Acc:MGI:99181]	zf-C2H2
ENSMUSG00000055022	1.47389	0.223773	0.225983	0.362536	0.0911079	0.0409235	Cntn1	15	92051165	92341967	+	9433	protein_coding	contactin 1 [Source:MGI Symbol;Acc:MGI:105980]	-
ENSMUSG00000101904	1.03434	0.0126844	0.0957022	0.323798	0.0603345	0	Gm29427	1	130670209	130715799	-	1909	protein_coding	predicted gene 29427 [Source:MGI Symbol;Acc:MGI:5580133]	-
ENSMUSG00000074158	0.138527	1.4025	1.39737	1.1366	1.94355	2.65048	Zfp976	7	42609526	42642588	-	4995	protein_coding	zinc finger protein 976 [Source:MGI Symbol;Acc:MGI:3036263]	zf-C2H2
ENSMUSG00000029364	12.5731	5.65706	5.06212	4.86129	5.29374	4.47986	Wsb2	5	117357304	117378601	+	5857	protein_coding	WD repeat and SOCS box-containing 2 [Source:MGI Symbol;Acc:MGI:2144041]	-
ENSMUSG00000029173	0.97973	2.37805	1.78798	2.15284	3.55541	3.20082	Sepsecs	5	52640087	52669708	-	6982	protein_coding	Sep (O-phosphoserine) tRNA:Sec (selenocysteine) tRNA synthase [Source:MGI Symbol;Acc:MGI:1098791]	-
ENSMUSG00000047996	0.197812	1.15995	0.581832	0.920727	0.44413	0.388349	Prrg1	X	78449613	78583896	-	11614	protein_coding	proline rich Gla (G-carboxyglutamic acid) 1 [Source:MGI Symbol;Acc:MGI:1917364]	-
ENSMUSG00000026365	3.01216	7.33272	7.02287	7.92315	7.54913	13.7856	Cfh	1	140084708	140183764	-	8383	protein_coding	complement component factor h [Source:MGI Symbol;Acc:MGI:88385]	-
ENSMUSG00000041506	7.52295	3.07755	4.70175	2.91419	3.46251	3.89775	Rrp9	9	106475963	106485424	+	2933	protein_coding	RRP9, small subunit (SSU) processome component, homolog (yeast) [Source:MGI Symbol;Acc:MGI:2384313]	-
ENSMUSG00000052331	2.10571	3.95319	2.63614	3.24772	4.37999	4.02055	Ankrd44	1	54645340	54926387	-	14175	protein_coding	ankyrin repeat domain 44 [Source:MGI Symbol;Acc:MGI:3045243]	-
ENSMUSG00000071042	4.39903	11.7049	7.03351	12.9265	6.0488	4.76093	Rasgrp3	17	75435905	75529043	+	4921	protein_coding	RAS, guanyl releasing protein 3 [Source:MGI Symbol;Acc:MGI:3028579]	-
ENSMUSG00000116825	1.80468	0	0	0.199006	0.0228367	0.050205	AC083895.1	16	18681337	18682216	-	880	processed_pseudogene	ribosomal protein S2 (Rps2) pseudogene	-
ENSMUSG00000029815	4.35998	1.33558	2.46524	2.49909	2.67301	1.95179	Malsu1	6	49073795	49086751	+	3777	protein_coding	mitochondrial assembly of ribosomal large subunit 1 [Source:MGI Symbol;Acc:MGI:1922843]	-
ENSMUSG00000068299	0	0.563965	0.418784	0.659501	1.38977	0.964343	Nat8f4	6	85899051	85904884	-	3223	protein_coding	N-acetyltransferase 8 (GCN5-related) family member 4 [Source:MGI Symbol;Acc:MGI:1922791]	-
ENSMUSG00000043557	0	0.131663	0.352824	0.46468	0.0858278	0.306726	Mdga1	17	29827956	29970087	-	9395	protein_coding	MAM domain containing glycosylphosphatidylinositol anchor 1 [Source:MGI Symbol;Acc:MGI:1922012]	-
ENSMUSG00000100183	2.9116	0.0476665	0.0353232	0.302963	0.105492	0	Gm28512	1	153750682	153751547	+	762	sense_intronic	predicted gene 28512 [Source:MGI Symbol;Acc:MGI:5579218]	-
ENSMUSG00000113601	1.42868	0.0554533	0.372928	0.55436	0	0.320392	Gm48735	13	62681192	62682501	-	1310	TEC	predicted gene, 48735 [Source:MGI Symbol;Acc:MGI:6098399]	-
ENSMUSG00000097526	0	0.709665	0	0.164671	0	0	Gm26847	10	128230590	128232790	-	2109	lincRNA	predicted gene, 26847 [Source:MGI Symbol;Acc:MGI:5477341]	-
ENSMUSG00000007946	1.17327	0	0	0.0853298	0	0	Phox2a	7	101818313	101822726	+	2035	protein_coding	paired-like homeobox 2a [Source:MGI Symbol;Acc:MGI:106633]	Homeobox
ENSMUSG00000106680	0	2.07455	0.190792	0.825131	0.623766	0	Gm43852	5	32713072	32713988	-	917	TEC	predicted gene 43852 [Source:MGI Symbol;Acc:MGI:5663989]	-
ENSMUSG00000061390	0	3.69124	5.71973	0.811681	0.69453	0.943884	Uba52-ps	9	72174580	72174958	-	379	processed_pseudogene	ubitquitin A-52 residue ribosomal protein fusion product 1, pseudogene [Source:MGI Symbol;Acc:MGI:3644625]	-
ENSMUSG00000038836	0.028067	0.355427	0.235762	0.365689	0.800548	0.87523	Agbl3	6	34780432	34859459	+	11206	protein_coding	ATP/GTP binding protein-like 3 [Source:MGI Symbol;Acc:MGI:1923473]	-
ENSMUSG00000015468	0.755851	2.70668	1.33125	1.45376	1.48632	0.849124	Notch4	17	34564268	34588503	+	8061	protein_coding	notch 4 [Source:MGI Symbol;Acc:MGI:107471]	-
ENSMUSG00000105479	2.1726	0	0.0169926	0	0	0	Gm43132	5	11828046	11844359	-	792	lincRNA	predicted gene 43132 [Source:MGI Symbol;Acc:MGI:5663269]	-
ENSMUSG00000040632	0.281961	0	0.0659232	0.00508719	0	0	Nrl	14	55518978	55524981	-	5689	protein_coding	neural retina leucine zipper gene [Source:MGI Symbol;Acc:MGI:102567]	TF_bZIP
ENSMUSG00000083678	7.82845	1.99168	6.56553	3.56194	3.11124	4.70164	Gm12989	4	135715868	135716598	-	731	processed_pseudogene	predicted gene 12989 [Source:MGI Symbol;Acc:MGI:3652245]	-
ENSMUSG00000037266	14.834	50.2092	51.9851	49.9901	76.0433	88.2768	Rsrp1	4	134923592	134927671	+	3349	protein_coding	arginine/serine rich protein 1 [Source:MGI Symbol;Acc:MGI:106498]	-
ENSMUSG00000110447	0.473732	0	0.918434	0.451076	0.0338839	0	Gm31518	8	95593422	95621509	+	3207	lincRNA	predicted gene, 31518 [Source:MGI Symbol;Acc:MGI:5590677]	-
ENSMUSG00000026174	7.68735	3.80783	5.41856	4.82866	5.35134	5.66825	Cnot9	1	74506058	74530842	+	3826	protein_coding	CCR4-NOT transcription complex, subunit 9 [Source:MGI Symbol;Acc:MGI:1928902]	-
ENSMUSG00000084235	10.832	1.70458	5.76066	3.29984	1.89126	1.35797	Gm15421	5	22528321	22529244	-	489	transcribed_processed_pseudogene	predicted gene 15421 [Source:MGI Symbol;Acc:MGI:3705475]	-
ENSMUSG00000116762	0	1.40775	0.429109	0.588172	0.178691	0.382764	AC161376.1	16	31508387	31511777	+	995	lincRNA	novel transcript	-
ENSMUSG00000099025	0.719724	0	0	0.152625	0.0602967	0	Gm27162	9	32904937	32928966	-	2478	lincRNA	predicted gene 27162 [Source:MGI Symbol;Acc:MGI:5521005]	-
ENSMUSG00000032079	0.627259	0	0	0.0573771	0	0	Apoa5	9	46268633	46271919	+	2522	protein_coding	apolipoprotein A-V [Source:MGI Symbol;Acc:MGI:1913363]	-
ENSMUSG00000113108	3.93519	0	0	0.28797	0	0	Gm47832	12	38936413	38937049	-	402	processed_pseudogene	predicted gene, 47832 [Source:MGI Symbol;Acc:MGI:6097030]	-
ENSMUSG00000111758	0.857469	0.0447943	0.476055	0.225479	0.0179999	0	Gm30373	9	43924751	43970253	-	6037	lincRNA	predicted gene, 30373 [Source:MGI Symbol;Acc:MGI:5589532]	-
ENSMUSG00000102478	1.1852	0	0	0.254673	0.0409185	0.0148555	BC085271	1	183205071	183206557	-	1487	transcribed_processed_pseudogene	cDNA sequence BC085271 [Source:MGI Symbol;Acc:MGI:3612444]	-
ENSMUSG00000039485	1.03998	3.42706	2.19451	3.88751	4.71673	3.59758	Tspyl4	10	34297442	34301320	+	3879	protein_coding	TSPY-like 4 [Source:MGI Symbol;Acc:MGI:106393]	-
ENSMUSG00000015396	7.18827	2.08621	6.66262	2.57863	3.18354	3.0206	Cd83	13	43784775	43803132	+	2572	protein_coding	CD83 antigen [Source:MGI Symbol;Acc:MGI:1328316]	-
ENSMUSG00000024518	0	1.20432	0.207438	0.0867017	0	0.185298	Rax	18	65934639	65939089	-	1669	protein_coding	retina and anterior neural fold homeobox [Source:MGI Symbol;Acc:MGI:109632]	Homeobox
ENSMUSG00000002797	3.09886	1.1342	1.01513	1.31902	0.805423	0.946609	Ggct	6	54982580	54992950	-	7745	protein_coding	gamma-glutamyl cyclotransferase [Source:MGI Symbol;Acc:MGI:95700]	-
ENSMUSG00000026180	4.28541	0.49172	1.61386	0.39023	0.11068	0.581797	Cxcr2	1	74153989	74161246	+	3048	protein_coding	chemokine (C-X-C motif) receptor 2 [Source:MGI Symbol;Acc:MGI:105303]	-
ENSMUSG00000068749	42.2606	22.9688	21.8429	28.9638	26.7603	31.847	Psma5	3	108256926	108279974	+	1321	protein_coding	proteasome (prosome, macropain) subunit, alpha type 5 [Source:MGI Symbol;Acc:MGI:1347009]	-
ENSMUSG00000032698	8.79258	22.4259	15.5109	18.1544	13.8333	8.7324	Lmo2	2	103957986	103981878	+	2166	protein_coding	LIM domain only 2 [Source:MGI Symbol;Acc:MGI:102811]	-
ENSMUSG00000002486	0.444253	1.32981	1.38496	1.42811	2.14264	1.74245	Tchp	5	114707760	114722327	+	7397	protein_coding	trichoplein, keratin filament binding [Source:MGI Symbol;Acc:MGI:1925082]	-
ENSMUSG00000062098	2.48462	4.9489	3.58819	5.18945	3.93715	3.70206	Btbd3	2	138256565	138589292	+	5776	protein_coding	BTB (POZ) domain containing 3 [Source:MGI Symbol;Acc:MGI:2385155]	-
ENSMUSG00000075391	6.81371	0.665964	6.05141	0.576271	0.590213	1.73191	Gm13443	2	35340409	35340963	+	555	processed_pseudogene	predicted gene 13443 [Source:MGI Symbol;Acc:MGI:3649615]	-
ENSMUSG00000041769	9.28344	4.30078	3.46711	4.15824	3.43424	3.87743	Ppp2r2d	7	138846079	138883057	+	5903	protein_coding	protein phosphatase 2, regulatory subunit B, delta [Source:MGI Symbol;Acc:MGI:1289252]	-
ENSMUSG00000026068	2.6195	0.419313	0.383577	0.249481	0.722055	0.343753	Il18rap	1	40515362	40551705	+	6752	protein_coding	interleukin 18 receptor accessory protein [Source:MGI Symbol;Acc:MGI:1338888]	-
ENSMUSG00000085142	2.50381	0	0	0.331025	0	0	Gm12702	4	100052520	100065984	+	612	lincRNA	predicted gene 12702 [Source:MGI Symbol;Acc:MGI:3650874]	-
ENSMUSG00000082432	0.90783	0	0.0315549	0.0508928	0.0318481	0	Gm11231	4	71678013	71679718	+	1706	processed_pseudogene	predicted gene 11231 [Source:MGI Symbol;Acc:MGI:3650253]	-
ENSMUSG00000085085	1.49208	0.0239986	1.73562	0.0291716	1.01377	0.11336	1700086P04Rik	4	129050097	129057983	-	1009	lincRNA	RIKEN cDNA 1700086P04 gene [Source:MGI Symbol;Acc:MGI:1914599]	-
ENSMUSG00000031149	1.71066	9.76335	8.77992	10.5999	6.15661	9.1765	Praf2	X	7728439	7731064	+	1339	protein_coding	PRA1 domain family 2 [Source:MGI Symbol;Acc:MGI:1859607]	-
ENSMUSG00000037408	0	0.378613	1.91595	0.854485	1.0778	0.522286	Cnnm4	1	36471620	36508764	+	4829	protein_coding	cyclin M4 [Source:MGI Symbol;Acc:MGI:2151060]	-
ENSMUSG00000113018	3.72884	0.0276422	0.0614527	0.632487	0	0	Gm9318	12	24776246	24776683	-	438	processed_pseudogene	predicted gene 9318 [Source:MGI Symbol;Acc:MGI:3646781]	-
ENSMUSG00000072812	0.0498499	0.357717	0.405659	0.296981	0.398914	0.780698	Ahnak2	12	112772194	112802657	-	14163	protein_coding	AHNAK nucleoprotein 2 [Source:MGI Symbol;Acc:MGI:2144831]	-
ENSMUSG00000105377	0	3.64805	0.103524	0	1.07342	0	Gm43148	5	96936813	96937332	+	520	TEC	predicted gene 43148 [Source:MGI Symbol;Acc:MGI:5663285]	-
ENSMUSG00000023781	1.02965	0.0133856	0.730398	0.143985	0.0930886	0.0711317	Hes7	11	69120404	69124055	+	1809	protein_coding	hes family bHLH transcription factor 7 [Source:MGI Symbol;Acc:MGI:2135679]	bHLH
ENSMUSG00000018821	55.7857	25.1767	29.5317	28.2523	40.3569	37.4134	Avpi1	19	42123273	42129059	-	1236	protein_coding	arginine vasopressin-induced 1 [Source:MGI Symbol;Acc:MGI:1916784]	-
ENSMUSG00000039191	6.73807	3.29159	3.16155	2.83857	2.74839	2.90325	Rbpj	5	53466152	53657362	+	12750	protein_coding	recombination signal binding protein for immunoglobulin kappa J region [Source:MGI Symbol;Acc:MGI:96522]	CSL
ENSMUSG00000004837	113.775	63.4055	42.561	46.0071	36.0095	24.4844	Grap	11	61653265	61672784	+	1793	protein_coding	GRB2-related adaptor protein [Source:MGI Symbol;Acc:MGI:1918770]	-
ENSMUSG00000022491	0.736667	0	156.829	0.0678411	0	0	Glycam1	15	103562759	103565081	-	2133	protein_coding	glycosylation dependent cell adhesion molecule 1 [Source:MGI Symbol;Acc:MGI:95759]	-
ENSMUSG00000058569	23.8448	12.8517	12.6623	11.4088	15.9189	17.1058	Tmed9	13	55573732	55597697	+	3439	protein_coding	transmembrane p24 trafficking protein 9 [Source:MGI Symbol;Acc:MGI:1914761]	-
ENSMUSG00000080845	8.05718	0.597626	0.841163	0.317686	0.946313	1.19243	Gm9115	X	102724402	102725749	-	1348	processed_pseudogene	predicted gene 9115 [Source:MGI Symbol;Acc:MGI:3648181]	-
ENSMUSG00000109419	0.397547	0	0.116737	0.431585	0.0252022	0	Gm45163	8	24220510	24230146	+	3987	lincRNA	predicted gene 45163 [Source:MGI Symbol;Acc:MGI:5753739]	-
ENSMUSG00000105509	0	0.338022	0.0682266	0.118251	0.0183954	0.257995	C130013H08Rik	3	110250015	110253706	+	3692	antisense	RIKEN cDNA C130013H08 gene [Source:MGI Symbol;Acc:MGI:3697343]	-
ENSMUSG00000029670	6.24769	2.71102	2.79434	3.27789	2.36095	2.75397	Ing3	6	21949571	21976038	+	4796	protein_coding	inhibitor of growth family, member 3 [Source:MGI Symbol;Acc:MGI:1919027]	-
ENSMUSG00000071568	0	2.67565	0	0.113941	0.107553	0.0869692	Gm5874	6	18824552	18825059	+	508	processed_pseudogene	predicted gene 5874 [Source:MGI Symbol;Acc:MGI:3648027]	-
ENSMUSG00000027333	12.5572	4.35443	5.85451	4.10755	6.46713	6.58407	Smox	2	131491496	131525922	+	3894	protein_coding	spermine oxidase [Source:MGI Symbol;Acc:MGI:2445356]	-
ENSMUSG00000026457	38.6337	22.7562	22.8841	22.9267	21.705	18.2906	Adipor1	1	134415378	134433351	+	5025	protein_coding	adiponectin receptor 1 [Source:MGI Symbol;Acc:MGI:1919924]	-
ENSMUSG00000085665	0	0.406316	0.216717	0.336501	0.522208	0.686085	Gm12059	11	23067998	23075574	+	3105	processed_transcript	predicted gene 12059 [Source:MGI Symbol;Acc:MGI:3649372]	-
ENSMUSG00000085156	9.32941	2.76483	4.7776	4.25622	4.13833	3.93621	Snhg15	11	6525591	6528760	-	1359	processed_transcript	small nucleolar RNA host gene 15 [Source:MGI Symbol;Acc:MGI:3650059]	-
ENSMUSG00000025050	0.404766	3.85986	2.94826	3.45091	4.41842	3.80868	Pcgf6	19	47033619	47050845	-	2098	protein_coding	polycomb group ring finger 6 [Source:MGI Symbol;Acc:MGI:1918291]	-
ENSMUSG00000023104	2.20214	4.83085	6.16911	5.25305	11.5849	11.5721	Rfc2	5	134581366	134601805	+	6303	protein_coding	replication factor C (activator 1) 2 [Source:MGI Symbol;Acc:MGI:1341868]	-
ENSMUSG00000032194	10.2054	20.5896	11.4987	16.8056	14.7336	12.8272	Kank2	9	21766784	21798744	-	5235	protein_coding	KN motif and ankyrin repeat domains 2 [Source:MGI Symbol;Acc:MGI:2384568]	-
ENSMUSG00000034793	1.47193	5.16558	8.10092	5.80463	11.0588	12.6678	G6pc3	11	102189620	102194081	+	2226	protein_coding	glucose 6 phosphatase, catalytic, 3 [Source:MGI Symbol;Acc:MGI:1915651]	-
ENSMUSG00000045967	0.193571	0	0	0.0426289	0	0	Gpr158	2	21367542	21830547	+	8170	protein_coding	G protein-coupled receptor 158 [Source:MGI Symbol;Acc:MGI:2441697]	-
ENSMUSG00000108414	11.3667	3.15614	5.32167	4.7337	4.67918	3.95863	Snhg1	19	8723475	8726443	+	2969	processed_transcript	small nucleolar RNA host gene 1 [Source:MGI Symbol;Acc:MGI:3763743]	-
ENSMUSG00000078427	27.8224	14.2257	17.5968	14.3191	16.1665	13.1635	Sarnp	10	128817333	128877629	+	1360	protein_coding	SAP domain containing ribonucleoprotein [Source:MGI Symbol;Acc:MGI:1913368]	-
ENSMUSG00000040687	1.33106	3.65918	3.31561	3.16046	2.35395	2.31831	Madd	2	91137360	91183837	-	9086	protein_coding	MAP-kinase activating death domain [Source:MGI Symbol;Acc:MGI:2444672]	-
ENSMUSG00000105717	1.09366	0.0830646	0.188081	0.076241	0.0143442	0.0236512	Gm43465	3	101084592	101087393	-	2802	sense_intronic	predicted gene 43465 [Source:MGI Symbol;Acc:MGI:5663602]	-
ENSMUSG00000046865	13.5439	6.40852	9.88645	6.50719	6.76038	8.44912	Fbl	7	28169710	28179269	+	4209	protein_coding	fibrillarin [Source:MGI Symbol;Acc:MGI:95486]	-
ENSMUSG00000059434	0.640508	0.0250874	1.00767	0.314916	0.0689343	0.0857519	Gckr	5	31297443	31327314	+	4335	protein_coding	glucokinase regulatory protein [Source:MGI Symbol;Acc:MGI:1096345]	-
ENSMUSG00000053111	0.47438	3.2412	4.85096	5.90256	18.5506	26.947	Fank1	7	133776861	133881532	+	2299	protein_coding	fibronectin type 3 and ankyrin repeat domains 1 [Source:MGI Symbol;Acc:MGI:1914180]	-
ENSMUSG00000024742	0.97403	0	1.05121	0.324869	0.186453	0	Fen1	19	10199132	10204169	-	2422	protein_coding	flap structure specific endonuclease 1 [Source:MGI Symbol;Acc:MGI:102779]	-
ENSMUSG00000081135	1.85464	0	0.272181	0.626279	0	0	Gm14800	X	97161655	97162926	-	1272	processed_pseudogene	predicted gene 14800 [Source:MGI Symbol;Acc:MGI:3705352]	-
ENSMUSG00000034795	8.41792	2.3949	1.95259	2.51276	3.75087	3.29124	Ccdc122	14	77036772	77112257	+	1985	protein_coding	coiled-coil domain containing 122 [Source:MGI Symbol;Acc:MGI:1918358]	-
ENSMUSG00000117187	17.8935	2.56169	1.5003	1.32244	1.90614	1.06818	CT033749.1	17	74438285	74438639	-	355	processed_pseudogene	elongin B (Elob) pseudogene	-
ENSMUSG00000042808	17.7355	6.70886	16.4893	12.9382	22.3624	25.0408	Gpx2	12	76792333	76795554	-	3222	protein_coding	glutathione peroxidase 2 [Source:MGI Symbol;Acc:MGI:106609]	-
ENSMUSG00000004207	48.5352	89.7661	109.898	73.1786	97.2867	110.501	Psap	10	60277627	60302597	+	2744	protein_coding	prosaposin [Source:MGI Symbol;Acc:MGI:97783]	-
ENSMUSG00000058594	1.75137	4.56054	4.0289	3.55488	5.15188	4.54344	Fbxo18	2	11742573	11777582	-	5115	protein_coding	F-box protein 18 [Source:MGI Symbol;Acc:MGI:1354699]	-
ENSMUSG00000026430	9.16969	3.43816	4.99448	2.67085	2.9657	1.43716	Rassf5	1	131176410	131245258	-	3997	protein_coding	Ras association (RalGDS/AF-6) domain family member 5 [Source:MGI Symbol;Acc:MGI:1926375]	-
ENSMUSG00000027999	13.2791	5.48163	5.77923	7.22811	6.64606	7.38914	Pla2g12a	3	129878606	129895825	+	3682	protein_coding	phospholipase A2, group XIIA [Source:MGI Symbol;Acc:MGI:1913600]	-
ENSMUSG00000059654	1.71864	0	0.625395	0	0	0	Reg1	6	78422711	78428667	+	904	protein_coding	regenerating islet-derived 1 [Source:MGI Symbol;Acc:MGI:97895]	-
ENSMUSG00000036813	0	0.656422	1.3113	1.34403	3.768	4.18553	Entpd8	2	25080304	25085716	+	2715	protein_coding	ectonucleoside triphosphate diphosphohydrolase 8 [Source:MGI Symbol;Acc:MGI:1919340]	-
ENSMUSG00000008140	8.00597	18.9692	19.6197	15.2867	13.448	16.7469	Emc10	7	44489937	44496529	-	2917	protein_coding	ER membrane protein complex subunit 10 [Source:MGI Symbol;Acc:MGI:1916933]	-
ENSMUSG00000078796	0.315052	0	0.321913	0.32004	0	0	Zfp541	7	16061814	16096334	+	4879	protein_coding	zinc finger protein 541 [Source:MGI Symbol;Acc:MGI:3647699]	zf-C2H2
ENSMUSG00000028266	22.1643	12.2594	16.4082	13.2294	11.8473	14.6129	Lmo4	3	144188530	144205220	-	3530	protein_coding	LIM domain only 4 [Source:MGI Symbol;Acc:MGI:109360]	-
ENSMUSG00000104891	1.48346	0.0575169	0.127868	0.25245	0.24808	0.0751112	2510017J16Rik	5	3585112	3586374	+	1263	antisense	RIKEN cDNA 2510017J16 gene [Source:MGI Symbol;Acc:MGI:1913824]	-
ENSMUSG00000002781	0.143571	0.780526	1.30655	0.630241	0.777294	0.990268	Tmem143	7	45896941	45917413	+	7518	protein_coding	transmembrane protein 143 [Source:MGI Symbol;Acc:MGI:1917459]	-
ENSMUSG00000025173	17.3567	8.58256	8.66259	10.6205	9.06058	7.41548	Wdr45b	11	121327224	121354445	-	4562	protein_coding	WD repeat domain 45B [Source:MGI Symbol;Acc:MGI:1914090]	-
ENSMUSG00000044066	1.04302	2.64174	3.31726	2.34724	2.00817	1.13723	Cep68	11	20227037	20249429	-	5865	protein_coding	centrosomal protein 68 [Source:MGI Symbol;Acc:MGI:2667663]	-
ENSMUSG00000024697	1.74924	5.01142	4.04106	2.86175	3.66725	2.03692	Gna14	19	16435667	16610818	+	3383	protein_coding	guanine nucleotide binding protein, alpha 14 [Source:MGI Symbol;Acc:MGI:95769]	-
ENSMUSG00000032555	0.714388	2.05447	1.57407	1.26145	1.10842	1.6897	Topbp1	9	103305215	103350428	+	11226	protein_coding	topoisomerase (DNA) II binding protein 1 [Source:MGI Symbol;Acc:MGI:1920018]	-
ENSMUSG00000031740	4.88033	11.2061	8.74451	7.68614	6.14588	4.13875	Mmp2	8	92827291	92853420	+	3371	protein_coding	matrix metallopeptidase 2 [Source:MGI Symbol;Acc:MGI:97009]	-
ENSMUSG00000050017	12.6466	5.26349	2.53628	7.84811	6.96516	4.80873	Pitpnb	5	111330763	111388359	+	3377	protein_coding	phosphatidylinositol transfer protein, beta [Source:MGI Symbol;Acc:MGI:1927542]	-
ENSMUSG00000111611	1.0002	0.127076	0.440144	0.456544	0.026686	0.0767832	Olfr157	4	43830542	43840201	-	6617	protein_coding	olfactory receptor 157 [Source:MGI Symbol;Acc:MGI:1352684]	-
ENSMUSG00000044820	3.59391	0.173186	3.32917	2.69308	0.729049	0.544116	AY074887	9	54950230	54950998	-	769	protein_coding	cDNA sequence AY074887 [Source:MGI Symbol;Acc:MGI:3575512]	-
ENSMUSG00000026672	8.58033	3.63896	3.17168	2.77584	2.72462	1.45977	Optn	2	5020642	5064051	-	3753	protein_coding	optineurin [Source:MGI Symbol;Acc:MGI:1918898]	-
ENSMUSG00000022748	1.88494	6.84913	7.8964	8.37815	6.81297	7.45623	Cmss1	16	57302000	57606864	-	1997	protein_coding	cms small ribosomal subunit 1 [Source:MGI Symbol;Acc:MGI:1913747]	-
ENSMUSG00000038011	0.309575	1.72013	3.10214	2.17345	8.01504	8.78203	Dnah10	5	124725085	124834308	+	16086	protein_coding	dynein, axonemal, heavy chain 10 [Source:MGI Symbol;Acc:MGI:1860299]	-
ENSMUSG00000072778	0.344484	0	0	0.00645141	0	0	Vmn2r27	6	124189756	124231856	-	4486	protein_coding	vomeronasal 2, receptor27 [Source:MGI Symbol;Acc:MGI:3761517]	-
ENSMUSG00000074731	2.61656	0.212997	0.185703	0.151991	0.0868425	0	Zfp345	2	150470991	150485091	-	2734	protein_coding	zinc finger protein 345 [Source:MGI Symbol;Acc:MGI:3652219]	zf-C2H2
ENSMUSG00000087190	5.58699	0.617686	1.44011	1.37116	0.363794	0.612602	D430001F17Rik	16	91931237	91962915	+	1871	antisense	RIKEN cDNA D430001F17 gene [Source:MGI Symbol;Acc:MGI:2441973]	-
ENSMUSG00000110747	3.33228	0.16732	2.1843	0.906114	0.115896	0.49406	Gm35657	9	41159424	41188862	+	989	lincRNA	predicted gene, 35657 [Source:MGI Symbol;Acc:MGI:5594816]	-
ENSMUSG00000106047	1.22959	0	0.0934904	0.15515	0	0	Gm42942	3	156703900	156705227	+	1328	TEC	predicted gene 42942 [Source:MGI Symbol;Acc:MGI:5663079]	-
ENSMUSG00000112068	2.36165	0	0.0421225	0.365416	0.0637709	0.0691399	Gm9182	10	128615401	128616039	+	639	processed_pseudogene	predicted gene 9182 [Source:MGI Symbol;Acc:MGI:3644174]	-
ENSMUSG00000116819	5.5796	0.0280262	2.56243	0.87091	0.0930383	0	AC140457.1	12	21373765	21374196	+	432	bidirectional_promoter_lncRNA	novel transcript, bidirectional to Adam17	-
ENSMUSG00000004668	0.181164	0.0132917	0.0441102	0.101389	0.0218251	0.0065196	Abca13	11	9191942	9684259	+	19737	protein_coding	ATP-binding cassette, sub-family A (ABC1), member 13 [Source:MGI Symbol;Acc:MGI:2388707]	-
ENSMUSG00000067541	1.79193	0	0	0.358475	0	0	A630073D07Rik	6	132625111	132651526	-	1288	protein_coding	RIKEN cDNA A630073D07 gene [Source:MGI Symbol;Acc:MGI:2686534]	-
ENSMUSG00000032580	2.04164	4.58844	5.12902	4.21101	5.77509	6.28272	Rbm5	9	107740371	107770996	-	15434	protein_coding	RNA binding motif protein 5 [Source:MGI Symbol;Acc:MGI:1933204]	-
ENSMUSG00000030741	0.993438	6.21484	6.98634	6.43438	10.402	14.4496	Spns1	7	126370060	126377450	-	3707	protein_coding	spinster homolog 1 [Source:MGI Symbol;Acc:MGI:1920908]	-
ENSMUSG00000107304	1.41168	0.0570595	0.276704	0.205171	0.132509	0.0168453	Gm43775	5	66069501	66072895	-	3395	TEC	predicted gene 43775 [Source:MGI Symbol;Acc:MGI:5663912]	-
ENSMUSG00000086680	6.40069	0.228081	1.65537	2.63823	3.45033	0.650905	Gm11592	11	97280128	97282897	+	637	antisense	predicted gene 11592 [Source:MGI Symbol;Acc:MGI:3650504]	-
ENSMUSG00000045065	0.603244	0.00447424	0.535674	0.171122	0	0	9930022D16Rik	11	109413917	109420405	+	2706	protein_coding	RIKEN cDNA 9930022D16 gene [Source:MGI Symbol;Acc:MGI:2444178]	-
ENSMUSG00000081382	2.58245	0.0461231	0.869041	0.584077	0.487917	0.801413	Rpl18-ps1	1	60900898	60901422	+	525	processed_pseudogene	ribosomal protein L18, pseudogene 1 [Source:MGI Symbol;Acc:MGI:98018]	-
ENSMUSG00000030451	0.401479	1.12977	1.39158	1.23651	1.60984	1.04078	Herc2	7	56050196	56231800	+	16175	protein_coding	HECT and RLD domain containing E3 ubiquitin protein ligase 2 [Source:MGI Symbol;Acc:MGI:103234]	-
ENSMUSG00000093759	0	5.78659	7.48442	5.791	2.50028	0.656278	Scarletltr	9	64080761	64086961	+	305	processed_transcript	Scarletltr, erythroid developmental long intergenic non-protein coding transcript [Source:MGI Symbol;Acc:MGI:1924064]	-
ENSMUSG00000031673	0.957389	3.52778	2.14575	2.86115	2.2844	2.09743	Cdh11	8	102632095	102785642	-	8904	protein_coding	cadherin 11 [Source:MGI Symbol;Acc:MGI:99217]	-
ENSMUSG00000026434	25.19	15.3869	17.1768	16.1329	13.0795	13.7907	Nucks1	1	131910534	131936321	+	6779	protein_coding	nuclear casein kinase and cyclin-dependent kinase substrate 1 [Source:MGI Symbol;Acc:MGI:1934811]	-
ENSMUSG00000065794	17.2462	0.358735	1.73794	4.29224	0	0	Gm25514	2	116968039	116968173	-	135	snRNA	predicted gene, 25514 [Source:MGI Symbol;Acc:MGI:5455291]	-
ENSMUSG00000082418	0.477553	0.00790552	1.43758	0.0192192	0.00656098	0.501031	Gm13126	4	144545506	144548568	-	3063	processed_pseudogene	predicted gene 13126 [Source:MGI Symbol;Acc:MGI:3651475]	-
ENSMUSG00000103284	5.69078	0.307028	0.847478	0.718627	0.0266076	0	3110080O07Rik	3	51829385	51830405	-	1021	TEC	RIKEN cDNA 3110080O07 gene [Source:MGI Symbol;Acc:MGI:1920491]	-
ENSMUSG00000021298	2.21451	0.53979	6.33157	0.541908	0.877219	1.79034	Gpr132	12	112850873	112868228	-	2715	protein_coding	G protein-coupled receptor 132 [Source:MGI Symbol;Acc:MGI:1890220]	-
ENSMUSG00000099107	19.1333	0	0	0	0	0	Gm27898	11	96199751	96199830	-	80	misc_RNA	predicted gene, 27898 [Source:MGI Symbol;Acc:MGI:5531280]	-
ENSMUSG00000098260	6.75464	0	1.00352	2.15121	0	0	Gm27522	6	30734418	30734647	+	230	misc_RNA	predicted gene, 27522 [Source:MGI Symbol;Acc:MGI:5530904]	-
ENSMUSG00000064147	3.41066	1.01481	2.29812	1.44752	0.416246	0.251725	Rab44	17	29114145	29148980	+	5065	protein_coding	RAB44, member RAS oncogene family [Source:MGI Symbol;Acc:MGI:3045302]	-
ENSMUSG00000044556	0	1.57867	0.91833	0.541291	1.03055	1.28003	Tex38	4	115779834	115781018	-	802	protein_coding	testis expressed 38 [Source:MGI Symbol;Acc:MGI:1922423]	-
ENSMUSG00000105746	0	1.15521	1.32968	2.14906	0.79433	1.44703	Gm43595	3	90468898	90470959	-	1071	unprocessed_pseudogene	predicted gene 43595 [Source:MGI Symbol;Acc:MGI:5663732]	-
ENSMUSG00000025337	109.499	53.6358	37.3122	53.0132	44.021	33.6357	Sbds	5	130245731	130255530	-	2033	protein_coding	SBDS ribosome maturation factor [Source:MGI Symbol;Acc:MGI:1913961]	-
ENSMUSG00000002679	14.8214	5.43081	7.89674	6.478	9.28611	7.24974	Med6	12	81573557	81595008	-	1447	protein_coding	mediator complex subunit 6 [Source:MGI Symbol;Acc:MGI:1917042]	-
ENSMUSG00000027456	6.65253	0.843363	2.0257	1.08566	3.19043	2.17541	Sdcbp2	2	151572622	151590005	+	1399	protein_coding	syndecan binding protein (syntenin) 2 [Source:MGI Symbol;Acc:MGI:2385156]	-
ENSMUSG00000091269	2.87801	0.0959568	0.35642	0.548173	0.151637	0.0270339	Gm6682	12	4782170	4783515	+	1346	processed_pseudogene	predicted gene 6682 [Source:MGI Symbol;Acc:MGI:3647156]	-
ENSMUSG00000078674	1.60135	0	1.07126	0.0944187	0.0146056	0	Mup18	4	61670177	61674136	-	930	protein_coding	major urinary protein 18 [Source:MGI Symbol;Acc:MGI:3705220]	-
ENSMUSG00000032267	0.547857	1.57572	1.41076	1.17862	1.71025	1.61716	Usp28	9	48985375	49042517	+	5832	protein_coding	ubiquitin specific peptidase 28 [Source:MGI Symbol;Acc:MGI:2442293]	-
ENSMUSG00000036893	1.79676	3.78145	2.70488	2.19571	2.34879	2.06331	Ehmt1	2	24789928	24919614	-	8116	protein_coding	euchromatic histone methyltransferase 1 [Source:MGI Symbol;Acc:MGI:1924933]	-
ENSMUSG00000102785	0.724798	0	0.0822339	0.199234	0.0585897	0.0138945	Gm2447	3	52739716	52776656	+	2058	lincRNA	predicted gene 2447 [Source:MGI Symbol;Acc:MGI:3780614]	-
ENSMUSG00000101188	34.5876	12.4608	11.8192	12.0752	9.6677	11.8167	Eif4a-ps4	1	60703932	60705149	+	1218	processed_pseudogene	eukaryotic translation initiation factor 4A, pseudogene 4 [Source:MGI Symbol;Acc:MGI:1195958]	-
ENSMUSG00000050777	16.1869	3.35794	1.49905	1.51844	2.00258	0.649286	Tmem37	1	120067377	120074074	-	1311	protein_coding	transmembrane protein 37 [Source:MGI Symbol;Acc:MGI:2157899]	-
ENSMUSG00000052428	3.39278	7.82995	6.92328	7.40706	10.6498	8.37005	Tmco1	1	167308378	167333978	+	4764	protein_coding	transmembrane and coiled-coil domains 1 [Source:MGI Symbol;Acc:MGI:1921173]	-
ENSMUSG00000050490	9.63747	1.9511	2.70183	3.51683	2.94972	1.39645	Gm8394	10	85313488	85314439	+	952	processed_pseudogene	predicted gene 8394 [Source:MGI Symbol;Acc:MGI:3647964]	-
ENSMUSG00000023015	0.39148	1.27857	1.83376	0.885124	0.416513	0.49688	Racgap1	15	99620496	99651656	-	7079	protein_coding	Rac GTPase-activating protein 1 [Source:MGI Symbol;Acc:MGI:1349423]	-
ENSMUSG00000052854	0.474499	0.0552168	0.0774242	0.0445922	0	0	Nrk	X	138914430	139010532	+	9210	protein_coding	Nik related kinase [Source:MGI Symbol;Acc:MGI:1351326]	-
ENSMUSG00000026835	1.12449	0	1.4132	0.605189	0	0	Fcnb	2	28076378	28084885	-	1339	protein_coding	ficolin B [Source:MGI Symbol;Acc:MGI:1341158]	-
ENSMUSG00000022052	10.4517	5.59823	4.76973	7.87106	5.77919	6.46931	Ppp2r2a	14	67014056	67072444	-	5381	protein_coding	protein phosphatase 2, regulatory subunit B, alpha [Source:MGI Symbol;Acc:MGI:1919228]	-
ENSMUSG00000112397	0	0.540026	0.717323	1.23582	0.246178	0.392014	Gm10824	10	22815749	22823330	+	2198	antisense	predicted gene 10824 [Source:MGI Symbol;Acc:MGI:3642049]	-
ENSMUSG00000109612	1.09259	0	0.230679	0.125467	0	0	Gm45253	8	46372106	46385888	-	2076	lincRNA	predicted gene 45253 [Source:MGI Symbol;Acc:MGI:5791089]	-
ENSMUSG00000027965	0.459339	0	0.0872045	0.0351653	0	0	Olfm3	3	114904078	115125722	+	4938	protein_coding	olfactomedin 3 [Source:MGI Symbol;Acc:MGI:2387329]	-
ENSMUSG00000036537	0.0325374	1.13714	0.8852	1.26399	2.8802	2.45803	Rnf113a1	X	37191245	37192467	+	1223	protein_coding	ring finger protein 113A1 [Source:MGI Symbol;Acc:MGI:1917192]	-
ENSMUSG00000048175	15.7155	7.87389	8.13565	10.5492	8.54184	5.82595	Asb8	15	98134637	98165625	-	2410	protein_coding	ankyrin repeat and SOCS box-containing 8 [Source:MGI Symbol;Acc:MGI:1925791]	-
ENSMUSG00000038756	0.23648	2.61704	5.55006	4.94238	17.2174	15.3139	Ttll6	11	96133786	96165451	+	3857	protein_coding	tubulin tyrosine ligase-like family, member 6 [Source:MGI Symbol;Acc:MGI:2683461]	-
ENSMUSG00000033577	2.82254	5.46183	3.1477	4.79758	4.02796	3.60169	Myo6	9	80165031	80311729	+	12078	protein_coding	myosin VI [Source:MGI Symbol;Acc:MGI:104785]	-
ENSMUSG00000104916	12.1543	0.734948	0.749591	2.26989	1.5465	1.61501	Gm42830	5	122377408	122377720	+	313	TEC	predicted gene 42830 [Source:MGI Symbol;Acc:MGI:5662967]	-
ENSMUSG00000001376	0.679148	1.82393	1.58054	1.57879	1.48314	1.62626	Vps50	6	3498382	3603531	+	10856	protein_coding	VPS50 EARP/GARPII complex subunit [Source:MGI Symbol;Acc:MGI:1920538]	-
ENSMUSG00000037731	6.14612	2.21117	4.20709	2.34222	2.18612	1.53323	Themis2	4	132781843	132796387	-	3079	protein_coding	thymocyte selection associated family member 2 [Source:MGI Symbol;Acc:MGI:2446213]	-
ENSMUSG00000106010	0.379162	0	0.117273	0.0701137	0	0	Gm42616	5	51875419	51879602	-	4184	TEC	predicted gene 42616 [Source:MGI Symbol;Acc:MGI:5662753]	-
ENSMUSG00000062093	5.48926	1.55119	0.971662	1.35444	1.19392	0.749841	Gm10110	14	89896228	89899447	-	3220	transcribed_processed_pseudogene	predicted gene 10110 [Source:MGI Symbol;Acc:MGI:3641718]	-
ENSMUSG00000099924	0.862491	0.0189409	0.0236835	0.0636626	0.0353652	0	Gm28320	1	51148309	51150581	+	2273	sense_intronic	predicted gene 28320 [Source:MGI Symbol;Acc:MGI:5579026]	-
ENSMUSG00000056209	33.4311	14.9358	15.0758	15.2153	15.4507	17.3592	Npm3	19	45747734	45749591	-	1187	protein_coding	nucleoplasmin 3 [Source:MGI Symbol;Acc:MGI:894653]	-
ENSMUSG00000020167	3.65777	9.53689	9.24301	6.87574	8.09091	9.11139	Tcf3	10	80409514	80433647	-	4039	protein_coding	transcription factor 3 [Source:MGI Symbol;Acc:MGI:98510]	bHLH
ENSMUSG00000113204	0.55457	2.17951	1.59314	1.68698	1.65612	1.26012	Gm46430	13	74579358	74617945	-	5899	lincRNA	predicted gene, 46430 [Source:MGI Symbol;Acc:MGI:5826067]	-
ENSMUSG00000028582	1.71606	3.6802	3.87469	3.20108	4.52066	3.19918	Cc2d1b	4	108619940	108634123	+	4771	protein_coding	coiled-coil and C2 domain containing 1B [Source:MGI Symbol;Acc:MGI:2443076]	-
ENSMUSG00000097640	3.02353	0.618546	1.23093	0.825382	0.538224	1.37409	Gm20033	5	64708207	64804117	-	3124	processed_transcript	predicted gene, 20033 [Source:MGI Symbol;Acc:MGI:5012218]	-
ENSMUSG00000110405	0.65177	0	0.028769	0.100251	0.0348436	0	Gm45534	8	57604818	57607156	-	2339	TEC	predicted gene 45534 [Source:MGI Symbol;Acc:MGI:5791370]	-
ENSMUSG00000110018	2.63212	0.320365	0.836548	0.976332	1.20542	0.907629	5430437J10Rik	15	5496266	5594984	+	2001	transcribed_processed_pseudogene	RIKEN cDNA 5430437J10 gene [Source:MGI Symbol;Acc:MGI:1918682]	-
ENSMUSG00000098227	1.51917	0	2.7312	0.0582901	0.206715	0	Gm4812	13	69345655	69346647	+	993	processed_pseudogene	predicted gene 4812 [Source:MGI Symbol;Acc:MGI:3779437]	-
ENSMUSG00000042686	1.58409	0.177362	0.574435	0.412706	0.331026	0.256375	Jph1	1	16964560	17097889	-	4998	protein_coding	junctophilin 1 [Source:MGI Symbol;Acc:MGI:1891495]	-
ENSMUSG00000028128	24.3713	8.44061	22.756	12.6393	28.4043	21.1019	F3	3	121723537	121735048	+	2527	protein_coding	coagulation factor III [Source:MGI Symbol;Acc:MGI:88381]	-
ENSMUSG00000025723	0	2.18008	2.83491	0.839399	2.60807	2.48622	Nmb	7	80902227	80905076	-	793	protein_coding	neuromedin B [Source:MGI Symbol;Acc:MGI:1915289]	-
ENSMUSG00000106732	0.729393	0.00547842	0.104439	0.183703	0	0.0129389	Gm43792	5	66429917	66432126	-	2210	TEC	predicted gene 43792 [Source:MGI Symbol;Acc:MGI:5663929]	-
ENSMUSG00000020935	2.70157	6.01077	5.58379	5.76582	3.97751	5.26212	Dcakd	11	102994047	103028333	-	2556	protein_coding	dephospho-CoA kinase domain containing [Source:MGI Symbol;Acc:MGI:1915337]	-
ENSMUSG00000026914	18.7288	7.61695	6.90233	6.7634	9.01174	8.68188	Psmd14	2	61711694	61800376	+	2820	protein_coding	proteasome (prosome, macropain) 26S subunit, non-ATPase, 14 [Source:MGI Symbol;Acc:MGI:1913284]	-
ENSMUSG00000041236	2.88714	6.21517	4.35048	6.3665	5.70471	4.65559	Vps41	13	18717286	18866811	+	6728	protein_coding	VPS41 HOPS complex subunit [Source:MGI Symbol;Acc:MGI:1929215]	-
ENSMUSG00000109108	1.88394	0.0329301	0.473274	0.292647	0.312305	0.320438	Gm36371	7	6156516	6157618	+	1103	bidirectional_promoter_lncRNA	predicted gene, 36371 [Source:MGI Symbol;Acc:MGI:5595530]	-
ENSMUSG00000097831	0	0.641832	0.715395	0.503809	0.178667	0	4930540M05Rik	6	119896159	119902653	-	2068	lincRNA	RIKEN cDNA 4930540M05 gene [Source:MGI Symbol;Acc:MGI:2148236]	-
ENSMUSG00000079014	4.18402	0.466217	0.730611	0.143809	0.256723	0.283542	Serpina3i	12	104263122	104269372	+	2224	protein_coding	serine (or cysteine) peptidase inhibitor, clade A, member 3I [Source:MGI Symbol;Acc:MGI:2182841]	-
ENSMUSG00000025439	15.3986	7.42428	6.67905	8.14244	5.98974	7.64288	Clns1a	7	97696634	97720796	+	3856	protein_coding	chloride channel, nucleotide-sensitive, 1A [Source:MGI Symbol;Acc:MGI:109638]	-
ENSMUSG00000035851	7.13971	4.14428	3.42756	4.34701	4.2887	4.20496	Ythdc1	5	86804221	86836659	+	13651	protein_coding	YTH domain containing 1 [Source:MGI Symbol;Acc:MGI:2443713]	-
ENSMUSG00000029819	3.9868	0	0.237776	0.971518	0	0	Npy	6	49822710	49829507	+	566	protein_coding	neuropeptide Y [Source:MGI Symbol;Acc:MGI:97374]	-
ENSMUSG00000028680	6.89484	1.62114	4.64069	2.0048	2.94292	1.6939	Plk3	4	117128655	117133963	-	2531	protein_coding	polo like kinase 3 [Source:MGI Symbol;Acc:MGI:109604]	-
ENSMUSG00000028469	1.70483	7.11898	3.77312	2.56794	5.96624	3.67226	Npr2	4	43631935	43651244	+	4667	protein_coding	natriuretic peptide receptor 2 [Source:MGI Symbol;Acc:MGI:97372]	-
ENSMUSG00000103439	5.21908	0.0873049	1.82939	0.159535	0.586778	0	Gm7019	12	115244185	115244553	-	369	processed_pseudogene	predicted pseudogene 7019 [Source:MGI Symbol;Acc:MGI:3645821]	-
ENSMUSG00000080268	33.6024	17.9433	23.8565	15.6705	20.0798	20.4716	Brms1	19	5041404	5049917	+	1338	protein_coding	breast cancer metastasis-suppressor 1 [Source:MGI Symbol;Acc:MGI:2388804]	-
ENSMUSG00000032827	0.793191	2.11619	1.2114	1.82793	2.10953	1.66946	Ppp1r9a	6	4902917	5165661	+	14531	protein_coding	protein phosphatase 1, regulatory subunit 9A [Source:MGI Symbol;Acc:MGI:2442401]	-
ENSMUSG00000062078	46.7043	24.7243	11.2488	19.424	16.9286	9.29361	Qk	17	10202601	10319854	-	14242	protein_coding	quaking [Source:MGI Symbol;Acc:MGI:97837]	-
ENSMUSG00000082920	3.15404	0.0771166	1.90178	0.368675	0.429747	0.0294505	Gm13864	6	34786679	34787463	+	785	processed_pseudogene	predicted gene 13864 [Source:MGI Symbol;Acc:MGI:3651491]	-
ENSMUSG00000015112	2.83101	0.652217	1.15287	1.09127	1.43286	2.59954	Slc25a13	6	6041218	6217173	-	3798	protein_coding	solute carrier family 25 (mitochondrial carrier, adenine nucleotide translocator), member 13 [Source:MGI Symbol;Acc:MGI:1354721]	-
ENSMUSG00000031997	0.293299	1.71603	0.964512	1.55994	0.340819	0.447847	Trpc6	9	8544142	8680741	+	5066	protein_coding	transient receptor potential cation channel, subfamily C, member 6 [Source:MGI Symbol;Acc:MGI:109523]	-
ENSMUSG00000022661	59.2612	30.9371	18.5889	29.5303	28.5314	27.1556	Cd200	16	45382135	45409053	-	3321	protein_coding	CD200 antigen [Source:MGI Symbol;Acc:MGI:1196990]	-
ENSMUSG00000028713	34.4326	80.2985	68.5497	90.2536	125.307	93.5556	Cyp4b1	4	115624725	115647723	-	2256	protein_coding	cytochrome P450, family 4, subfamily b, polypeptide 1 [Source:MGI Symbol;Acc:MGI:103225]	-
ENSMUSG00000024076	0.0389859	0.724346	1.04419	1.04057	0.858368	0.901566	Vit	17	78508064	78627408	+	3227	protein_coding	vitrin [Source:MGI Symbol;Acc:MGI:1921449]	-
ENSMUSG00000021408	4.52316	1.9155	1.58223	1.89105	1.64122	1.63946	Ripk1	13	34002363	34037147	+	8344	protein_coding	receptor (TNFRSF)-interacting serine-threonine kinase 1 [Source:MGI Symbol;Acc:MGI:108212]	-
ENSMUSG00000098481	0	15.7647	0	4.79986	0.117096	0	Gm27387	13	38086202	38086317	+	116	miRNA	predicted gene, 27387 [Source:MGI Symbol;Acc:MGI:5530769]	-
ENSMUSG00000027679	8.0398	4.11508	7.10362	4.93531	5.78008	5.77305	Dnajc19	3	34056020	34081321	-	4027	protein_coding	DnaJ heat shock protein family (Hsp40) member C19 [Source:MGI Symbol;Acc:MGI:1914963]	-
ENSMUSG00000082705	4.03466	0	0.107665	2.09559	0.0724437	0.589072	Gm15616	5	72047205	72047579	+	375	processed_pseudogene	predicted gene 15616 [Source:MGI Symbol;Acc:MGI:3783061]	-
ENSMUSG00000090843	1.04209	0.0861851	0.528259	0.642075	0.150734	0.335349	Heatr4	12	83954499	83984852	-	3038	protein_coding	HEAT repeat containing 4 [Source:MGI Symbol;Acc:MGI:4937307]	-
ENSMUSG00000064515	12.8555	0	0	0.247346	0	2.97011	n-R5s162	6	60250792	60250910	+	119	rRNA	nuclear encoded rRNA 5S 162 [Source:MGI Symbol;Acc:MGI:4422026]	-
ENSMUSG00000022280	11.272	4.71496	3.84709	4.42092	5.56769	4.79349	Rnf19a	15	36239933	36283147	-	4434	protein_coding	ring finger protein 19A [Source:MGI Symbol;Acc:MGI:1353623]	-
ENSMUSG00000095961	0.0852098	0	0.140493	0.0704738	0.00506691	0.0371384	Vmn2r102	17	19660328	19709533	+	17430	protein_coding	vomeronasal 2, receptor 102 [Source:MGI Symbol;Acc:MGI:3647786]	-
ENSMUSG00000027931	1.81057	7.812	5.11773	5.81485	8.29256	11.2325	Npr1	3	90450591	90465866	-	4783	protein_coding	natriuretic peptide receptor 1 [Source:MGI Symbol;Acc:MGI:97371]	-
ENSMUSG00000021363	0.431329	1.33082	1.54401	2.19248	4.27411	5.17226	Mak	13	41025008	41079706	-	7592	protein_coding	male germ cell-associated kinase [Source:MGI Symbol;Acc:MGI:96913]	-
ENSMUSG00000109250	0.873672	0	0	0.120731	0	0	Gm5053	7	108527397	108529074	-	1678	processed_pseudogene	predicted gene 5053 [Source:MGI Symbol;Acc:MGI:3645491]	-
ENSMUSG00000024910	0	1.41778	15.2914	1.74194	1.29647	2.92379	Ctsw	19	5465240	5468498	-	1232	protein_coding	cathepsin W [Source:MGI Symbol;Acc:MGI:1338045]	-
ENSMUSG00000104764	1.17901	0	0	0.207896	0.0159494	0	Gm43066	3	103601943	103603202	+	1260	sense_intronic	predicted gene 43066 [Source:MGI Symbol;Acc:MGI:5663203]	-
ENSMUSG00000028953	21.0489	11.0866	9.56659	13.1638	12.0553	9.56912	Abcf2	5	24565345	24577467	-	2569	protein_coding	ATP-binding cassette, sub-family F (GCN20), member 2 [Source:MGI Symbol;Acc:MGI:1351657]	-
ENSMUSG00000039159	29.9516	16.2889	14.495	19.6763	16.4294	13.3579	Ube2h	6	30211289	30304539	-	4780	protein_coding	ubiquitin-conjugating enzyme E2H [Source:MGI Symbol;Acc:MGI:104632]	-
ENSMUSG00000086377	0.653032	0.00342595	0.72044	0.182118	0.0422793	0.0750091	4930529C04Rik	3	91071662	91075195	+	3534	processed_pseudogene	RIKEN cDNA 4930529C04 gene [Source:MGI Symbol;Acc:MGI:1922392]	-
ENSMUSG00000107279	2.59971	0	1.22608	0.58445	0	0.24467	Gm43450	5	149868748	149871409	-	632	lincRNA	predicted gene 43450 [Source:MGI Symbol;Acc:MGI:5663587]	-
ENSMUSG00000083339	3.25224	0.0428577	0	0.307338	0.168287	0	Gm11693	11	113678530	113679331	+	565	processed_pseudogene	predicted gene 11693 [Source:MGI Symbol;Acc:MGI:3650932]	-
ENSMUSG00000022672	1.09551	0.440502	0.70423	0.411385	0.376135	0.27713	Prkdc	16	15637866	15842235	+	13187	protein_coding	protein kinase, DNA activated, catalytic polypeptide [Source:MGI Symbol;Acc:MGI:104779]	-
ENSMUSG00000037627	0.0444235	0.594465	1.31107	0.589558	2.37902	2.33684	Rgs22	15	36009479	36140400	-	5664	protein_coding	regulator of G-protein signalling 22 [Source:MGI Symbol;Acc:MGI:3613651]	-
ENSMUSG00000055978	1.32464	0.0949475	1.11995	0.189088	0.0939808	0.170832	Fut2	7	45648591	45666394	-	5431	protein_coding	fucosyltransferase 2 [Source:MGI Symbol;Acc:MGI:109374]	-
ENSMUSG00000106869	0.66385	0	1.82647	0.342584	0	0	Gm42473	5	115870144	115872434	+	2291	TEC	predicted gene 42473 [Source:MGI Symbol;Acc:MGI:5662610]	-
ENSMUSG00000083933	1.80077	0	0.128661	0.183356	0.212109	0.0268737	Gm15515	14	96231953	96232774	+	822	processed_pseudogene	predicted gene 15515 [Source:MGI Symbol;Acc:MGI:3782962]	-
ENSMUSG00000037525	0.189306	1.73514	1.62571	1.21111	1.8051	1.53905	Bcdin3d	15	99470079	99474730	-	4652	protein_coding	BCDIN3 domain containing [Source:MGI Symbol;Acc:MGI:1922534]	-
ENSMUSG00000099364	1.34184	0.120261	0.891664	1.34683	0.116074	0	5730419F03Rik	1	78595031	78609508	-	2092	lincRNA	RIKEN cDNA 5730419F03 gene [Source:MGI Symbol;Acc:MGI:1917787]	-
ENSMUSG00000027540	16.2618	7.17195	5.78925	5.31778	5.56434	4.1062	Ptpn1	2	167932057	167979385	+	5533	protein_coding	protein tyrosine phosphatase, non-receptor type 1 [Source:MGI Symbol;Acc:MGI:97805]	-
ENSMUSG00000068099	0	0.997737	1.96003	0.55083	0.0499382	0	1500009C09Rik	15	82252397	82260753	+	1904	protein_coding	RIKEN cDNA 1500009C09 gene [Source:MGI Symbol;Acc:MGI:1923755]	-
ENSMUSG00000081660	1.47297	0	0.0256346	0.175892	0.0574179	0	Gm11787	4	3496978	3516515	-	1050	unprocessed_pseudogene	predicted gene 11787 [Source:MGI Symbol;Acc:MGI:3702103]	-
ENSMUSG00000030662	18.7232	8.8409	8.10945	8.74733	10.1496	9.33149	Ipo5	14	120911224	120947999	+	6001	protein_coding	importin 5 [Source:MGI Symbol;Acc:MGI:1917822]	-
ENSMUSG00000042510	15.7775	6.6703	7.44568	9.47743	11.4108	7.93351	AA986860	1	130731976	130744622	+	3640	protein_coding	expressed sequence AA986860 [Source:MGI Symbol;Acc:MGI:2138143]	-
ENSMUSG00000109541	0	1.92922	2.70738	1.63158	0.0638991	0	Gm6112	7	82966589	82967217	-	629	processed_pseudogene	predicted gene 6112 [Source:MGI Symbol;Acc:MGI:3643615]	-
ENSMUSG00000106717	1.61706	0.355057	0.75146	0.810111	0.243319	0.243275	Gm42798	5	31210344	31214315	-	3972	TEC	predicted gene 42798 [Source:MGI Symbol;Acc:MGI:5662935]	-
ENSMUSG00000002240	1.12304	0	1.22166	0.673246	0.0353498	0.0691657	Prr27	5	87825686	87846387	+	1337	protein_coding	proline rich 27 [Source:MGI Symbol;Acc:MGI:1921029]	-
ENSMUSG00000106918	10.1533	4.97848	7.42226	5.55606	5.5444	5.99095	Mrpl33	5	31596935	31664384	+	7326	protein_coding	mitochondrial ribosomal protein L33 [Source:MGI Symbol;Acc:MGI:2137225]	-
ENSMUSG00000018848	16.6265	8.40429	8.2785	7.69284	8.36639	8.25891	Rars	11	35808381	35834506	-	3228	protein_coding	arginyl-tRNA synthetase [Source:MGI Symbol;Acc:MGI:1914297]	-
ENSMUSG00000022155	0	0.331628	0.381553	0.12763	0.036948	0.0410807	Mroh2b	15	4898737	4962205	+	5915	protein_coding	maestro heat-like repeat family member 2B [Source:MGI Symbol;Acc:MGI:1921905]	-
ENSMUSG00000103165	5.50989	0.418801	0.940926	0.086823	0.0401925	0	Gm37560	9	88731998	88732997	+	1000	TEC	predicted gene, 37560 [Source:MGI Symbol;Acc:MGI:5610788]	-
ENSMUSG00000112569	0.442118	0	0.203089	0.0602322	0.15087	0.110842	Gm33111	12	32073286	32080850	-	3388	lincRNA	predicted gene, 33111 [Source:MGI Symbol;Acc:MGI:5592270]	-
ENSMUSG00000109854	4.89747	0.0436299	1.59563	0	0	0	Gm45345	8	64838234	64839390	+	555	antisense	predicted gene 45345 [Source:MGI Symbol;Acc:MGI:5791181]	-
ENSMUSG00000095585	122.389	0.814915	16.8317	5.10549	1.94662	2.74001	CR974586.3	JH584293.1	41602	43114	-	312	protein_coding		-
ENSMUSG00000014778	3.31303	9.49207	6.67068	5.31248	6.37543	6.73885	Fhod1	8	105329163	105347953	-	4666	protein_coding	formin homology 2 domain containing 1 [Source:MGI Symbol;Acc:MGI:2679008]	-
ENSMUSG00000031328	10.643	25.8526	35.281	25.5987	32.139	32.7188	Flna	X	74223461	74249820	-	9400	protein_coding	filamin, alpha [Source:MGI Symbol;Acc:MGI:95556]	-
ENSMUSG00000026834	0.163222	0.00130298	0.141569	0.0716362	0.016661	0.00475467	Acvr1c	2	58267453	58357895	-	9292	protein_coding	activin A receptor, type IC [Source:MGI Symbol;Acc:MGI:2661081]	-
ENSMUSG00000002064	9.06411	18.4878	17.3776	17.8366	19.7951	17.0321	Sdf2	11	78245746	78255496	+	1515	protein_coding	stromal cell derived factor 2 [Source:MGI Symbol;Acc:MGI:108019]	-
ENSMUSG00000087170	0.660159	0	0	0.064342	0	0	1700001G01Rik	18	17019051	17137559	+	2249	lincRNA	RIKEN cDNA 1700001G01 gene [Source:MGI Symbol;Acc:MGI:1922683]	-
ENSMUSG00000082563	4.77867	0	0	0.31595	0	0	Gm15026	X	136890258	136890715	+	458	processed_pseudogene	predicted gene 15026 [Source:MGI Symbol;Acc:MGI:3705439]	-
ENSMUSG00000088875	18.1354	0.281565	8.15211	0	0	0	Gm25862	10	62923396	62923524	-	129	snoRNA	predicted gene, 25862 [Source:MGI Symbol;Acc:MGI:5455639]	-
ENSMUSG00000113318	0.934213	12.111	3.00849	1.83431	0.537948	1.61687	Gm18113	12	69369514	69370023	-	303	processed_pseudogene	predicted gene, 18113 [Source:MGI Symbol;Acc:MGI:5010298]	-
ENSMUSG00000081783	1.63959	0	1.77891	0.61467	0.0856347	0.229935	Gm15599	17	5110766	5112110	-	1345	processed_pseudogene	predicted gene 15599 [Source:MGI Symbol;Acc:MGI:3783046]	-
ENSMUSG00000097369	1.26303	0	1.00323	0.41439	0.0852566	0.0081887	Gm26545	12	80885549	80887674	-	1746	lincRNA	predicted gene, 26545 [Source:MGI Symbol;Acc:MGI:5477039]	-
ENSMUSG00000068879	1.28499	0	0.532663	0.180262	0	0	Gm5773	3	93773000	93774142	+	1143	protein_coding	predicted pseudogene 5773 [Source:MGI Symbol;Acc:MGI:3645792]	-
ENSMUSG00000041354	3.95251	12.2157	15.5994	7.46807	10.7335	9.64375	Rgl2	17	33929543	33937687	+	4625	protein_coding	ral guanine nucleotide dissociation stimulator-like 2 [Source:MGI Symbol;Acc:MGI:107483]	-
ENSMUSG00000027746	23.4496	12.1444	9.29253	11.3246	11.067	9.85185	Ufm1	3	53853376	53863830	-	5958	protein_coding	ubiquitin-fold modifier 1 [Source:MGI Symbol;Acc:MGI:1915140]	-
ENSMUSG00000022568	1.26133	3.41761	3.98049	3.13902	4.22297	3.95252	Scrib	15	76047158	76069784	-	6452	protein_coding	scribbled planar cell polarity [Source:MGI Symbol;Acc:MGI:2145950]	-
ENSMUSG00000086712	0	0.600792	0.24428	0.0488662	0.0286686	0.0482819	AI427809	4	53261356	53270232	-	2369	lincRNA	expressed sequence AI427809 [Source:MGI Symbol;Acc:MGI:2140270]	-
ENSMUSG00000054252	1.92063	6.00678	6.03876	7.4185	12.4568	9.607	Fgfr3	5	33721674	33737068	+	7158	protein_coding	fibroblast growth factor receptor 3 [Source:MGI Symbol;Acc:MGI:95524]	-
ENSMUSG00000004565	0.421339	2.26214	2.28616	1.76045	2.51375	2.78472	Pnpla6	8	3515384	3544267	+	9698	protein_coding	patatin-like phospholipase domain containing 6 [Source:MGI Symbol;Acc:MGI:1354723]	-
ENSMUSG00000035004	6.91219	1.64112	0.606961	0.958579	0.876618	0.784663	Igsf6	7	121064067	121074572	-	2175	protein_coding	immunoglobulin superfamily, member 6 [Source:MGI Symbol;Acc:MGI:1891393]	-
ENSMUSG00000032118	0.0689734	0.867673	0.967841	0.348264	0.328944	0.205983	Fez1	9	36821864	36878924	+	4104	protein_coding	fasciculation and elongation protein zeta 1 (zygin I) [Source:MGI Symbol;Acc:MGI:2670976]	-
ENSMUSG00000097279	1.09638	0	0.559556	0.238644	0.20433	0.0827968	Gm5106	5	8773577	8798523	-	1334	antisense	predicted gene 5106 [Source:MGI Symbol;Acc:MGI:3643983]	-
ENSMUSG00000028862	3.46683	1.20531	0.951798	1.27563	1.32479	1.3641	Map3k6	4	133240818	133252929	+	4604	protein_coding	mitogen-activated protein kinase kinase kinase 6 [Source:MGI Symbol;Acc:MGI:1855691]	-
ENSMUSG00000087651	4.42684	1.2071	1.04095	0.916234	0.795524	0.926804	1500009L16Rik	10	83722865	83762762	+	3465	protein_coding	RIKEN cDNA 1500009L16 gene [Source:MGI Symbol;Acc:MGI:1917034]	-
ENSMUSG00000030157	235.063	141.837	132.504	126.958	86.0844	68.8444	Clec2d	6	129180615	129186534	+	1213	protein_coding	C-type lectin domain family 2, member d [Source:MGI Symbol;Acc:MGI:2135589]	-
ENSMUSG00000083822	2.72895	0.0217366	0.162288	0.0828932	0.219477	0.0513374	Hmgb1-ps5	3	95530418	95530974	+	557	processed_pseudogene	high mobility group box 1, pseudogene 5 [Source:MGI Symbol;Acc:MGI:3776505]	-
ENSMUSG00000103696	1.32744	0.144104	0.349137	0.347301	0.108434	0.111004	Gm37531	1	59929688	59935102	+	5415	TEC	predicted gene, 37531 [Source:MGI Symbol;Acc:MGI:5610759]	-
ENSMUSG00000045027	1.84201	0.045757	0.091552	0.218753	0.568536	0.248558	Prss22	17	23993535	23998100	-	1323	protein_coding	protease, serine 22 [Source:MGI Symbol;Acc:MGI:1918085]	-
ENSMUSG00000048232	0.0335236	0.819643	0.984564	0.26718	0.96139	0.918695	Fbxo10	4	45034247	45084604	-	4691	protein_coding	F-box protein 10 [Source:MGI Symbol;Acc:MGI:2686937]	-
ENSMUSG00000037062	45.6622	25.1096	21.1432	23.706	21.8588	21.2596	Sh3glb1	3	144683678	144720335	-	7467	protein_coding	SH3-domain GRB2-like B1 (endophilin) [Source:MGI Symbol;Acc:MGI:1859730]	-
ENSMUSG00000026127	6.71133	3.44516	2.94502	3.04563	2.07825	2.64093	Imp4	1	34439851	34449356	+	8553	protein_coding	IMP4, U3 small nucleolar ribonucleoprotein [Source:MGI Symbol;Acc:MGI:106572]	-
ENSMUSG00000002625	5.65996	17.5801	17.2082	10.2763	20.8869	19.5802	Akap8l	17	32321425	32350581	-	2075	protein_coding	A kinase (PRKA) anchor protein 8-like [Source:MGI Symbol;Acc:MGI:1860606]	-
ENSMUSG00000050335	81.5317	42.0195	60.1533	37.03	39.0033	49.9912	Lgals3	14	47367751	47386160	+	1858	protein_coding	lectin, galactose binding, soluble 3 [Source:MGI Symbol;Acc:MGI:96778]	-
ENSMUSG00000021027	0.857503	2.16144	2.17469	2.06893	2.57087	2.57686	Ralgapa1	12	55602896	55821167	-	12315	protein_coding	Ral GTPase activating protein, alpha subunit 1 [Source:MGI Symbol;Acc:MGI:1931050]	-
ENSMUSG00000086006	4.0665	0.274313	0.0333329	0.127579	0.0373305	0.238989	Gm13293	2	11339488	11344111	+	1615	lincRNA	predicted gene 13293 [Source:MGI Symbol;Acc:MGI:3649469]	-
ENSMUSG00000053368	0.888063	0.0990697	0.32616	0.219231	0.106543	0.169915	Rxfp2	5	150018675	150082184	+	5690	protein_coding	relaxin/insulin-like family peptide receptor 2 [Source:MGI Symbol;Acc:MGI:2153463]	-
ENSMUSG00000032423	11.0287	5.77979	4.288	5.85009	5.73083	4.24167	Syncrip	9	88447009	88482574	-	12297	protein_coding	synaptotagmin binding, cytoplasmic RNA interacting protein [Source:MGI Symbol;Acc:MGI:1891690]	-
ENSMUSG00000037166	23.4919	58.3361	49.4192	56.7331	45.7912	41.2569	Ppp1r14a	7	29289308	29293801	+	1367	protein_coding	protein phosphatase 1, regulatory inhibitor subunit 14A [Source:MGI Symbol;Acc:MGI:1931139]	-
ENSMUSG00000108625	1.40327	0.0191571	0.82235	0.0915855	0.0691892	0	Gm44711	6	91938250	91939513	-	1264	TEC	predicted gene 44711 [Source:MGI Symbol;Acc:MGI:5753287]	-
ENSMUSG00000046275	3.89141	1.04012	1.7181	0.493063	0.819173	0.184998	Tusc5	11	76679808	76698664	+	3302	protein_coding	tumor suppressor candidate 5 [Source:MGI Symbol;Acc:MGI:3029307]	-
ENSMUSG00000030217	3.71171	10.3546	8.21184	9.80419	6.67254	3.94003	Art4	6	136848451	136857733	-	2517	protein_coding	ADP-ribosyltransferase 4 [Source:MGI Symbol;Acc:MGI:1202710]	-
ENSMUSG00000003382	4.04222	1.60494	2.3906	1.53118	1.9151	1.4865	Etv3	3	87525407	87540156	+	10274	protein_coding	ets variant 3 [Source:MGI Symbol;Acc:MGI:1350926]	ETS
ENSMUSG00000111291	0.0649832	1.04351	0.8309	0.520559	1.24668	1.40814	Gm48604	9	44290044	44292463	-	2420	lincRNA	predicted gene, 48604 [Source:MGI Symbol;Acc:MGI:6098186]	-
ENSMUSG00000081254	10.5331	0.557844	3.97145	4.96057	1.43352	7.27461	Gm12112	11	32910373	32910603	+	231	processed_pseudogene	predicted gene 12112 [Source:MGI Symbol;Acc:MGI:3650115]	-
ENSMUSG00000000563	52.6391	33.2738	37.5609	37.8999	38.1672	39.2589	Atp5f1	3	105942698	105960099	-	4105	protein_coding	ATP synthase, H+ transporting, mitochondrial F0 complex, subunit B1 [Source:MGI Symbol;Acc:MGI:1100495]	-
ENSMUSG00000070565	0.710202	2.15075	1.11935	2.21244	1.04006	1.1808	Rasal2	1	157135182	157412595	-	13740	protein_coding	RAS protein activator like 2 [Source:MGI Symbol;Acc:MGI:2443881]	-
ENSMUSG00000034855	42.329	0.220426	0.507081	0.0205025	3.2041	1.01759	Cxcl10	5	92346638	92348889	-	2252	protein_coding	chemokine (C-X-C motif) ligand 10 [Source:MGI Symbol;Acc:MGI:1352450]	-
ENSMUSG00000033632	0.474323	1.34662	0.680461	1.34608	1.33082	1.21347	AW554918	18	25168999	25467321	+	7014	protein_coding	expressed sequence AW554918 [Source:MGI Symbol;Acc:MGI:2147376]	-
ENSMUSG00000044037	1.71622	6.05477	7.57794	5.14883	7.08781	7.56671	Als2cl	9	110879870	110900530	+	5883	protein_coding	ALS2 C-terminal like [Source:MGI Symbol;Acc:MGI:2447532]	-
ENSMUSG00000006288	2.62721	6.08099	9.54632	8.24368	9.88548	9.76704	Ttc5	14	50765415	50785519	-	4065	protein_coding	tetratricopeptide repeat domain 5 [Source:MGI Symbol;Acc:MGI:2683584]	-
ENSMUSG00000031286	3.36652	1.00943	1.18612	1.94832	1.11746	1.25688	Glt28d2	3	85869849	85887516	-	2732	protein_coding	glycosyltransferase 28 domain containing 2 [Source:MGI Symbol;Acc:MGI:2443773]	-
ENSMUSG00000033059	3.37746	7.49201	8.30367	9.39137	9.5289	11.0808	Pygb	2	150786735	150831758	+	4809	protein_coding	brain glycogen phosphorylase [Source:MGI Symbol;Acc:MGI:97828]	-
ENSMUSG00000033444	5.10949	10.8443	5.30067	9.09148	7.10446	5.38028	Specc1l	10	75212073	75312743	+	13265	protein_coding	sperm antigen with calponin homology and coiled-coil domains 1-like [Source:MGI Symbol;Acc:MGI:1921642]	-
ENSMUSG00000029423	2.37859	0.160842	0.499185	0.535701	0.0201956	0.00328074	Piwil1	5	128702524	128755474	+	4358	protein_coding	piwi-like RNA-mediated gene silencing 1 [Source:MGI Symbol;Acc:MGI:1928897]	-
ENSMUSG00000041577	8.55504	20.9225	12.4306	21.8782	12.7243	14.511	Prelp	1	133910304	133921414	-	3615	protein_coding	proline arginine-rich end leucine-rich repeat [Source:MGI Symbol;Acc:MGI:2151110]	-
ENSMUSG00000043015	0.0799849	0.855479	1.34465	0.429858	1.40843	1.04799	Nemp2	1	52630703	52651919	+	7078	protein_coding	nuclear envelope integral membrane protein 2 [Source:MGI Symbol;Acc:MGI:2444113]	-
ENSMUSG00000060143	508.678	145.48	260.574	364.51	76.638	195.035	Gm10076	14	105681828	105682211	+	384	lincRNA	predicted gene 10076 [Source:MGI Symbol;Acc:MGI:3704451]	-
ENSMUSG00000098188	9.29933	4.47454	4.61063	4.46698	5.14335	4.80646	Sowahc	10	59221953	59226434	+	4482	protein_coding	sosondowah ankyrin repeat domain family member C [Source:MGI Symbol;Acc:MGI:3606051]	-
ENSMUSG00000023960	2.34706	6.18691	6.33532	5.90068	12.5569	13.092	Enpp5	17	44078813	44086567	+	4858	protein_coding	ectonucleotide pyrophosphatase/phosphodiesterase 5 [Source:MGI Symbol;Acc:MGI:1933830]	-
ENSMUSG00000090199	0.885388	0	0.384615	0.299944	0	0.163303	Gm16029	15	7397897	7411381	+	2427	antisense	predicted gene 16029 [Source:MGI Symbol;Acc:MGI:3801714]	-
ENSMUSG00000108286	1.46879	0	0	0	0	0	Gm44224	6	93079108	93080570	+	1463	TEC	predicted gene, 44224 [Source:MGI Symbol;Acc:MGI:5690616]	-
ENSMUSG00000036390	22.5682	10.2959	8.31818	8.21224	10.1069	6.86363	Gadd45a	6	67035096	67037457	-	1764	protein_coding	growth arrest and DNA-damage-inducible 45 alpha [Source:MGI Symbol;Acc:MGI:107799]	-
ENSMUSG00000023021	3.19599	7.94335	9.03985	7.09745	12.9399	11.095	Cers5	15	99734881	99772885	-	3542	protein_coding	ceramide synthase 5 [Source:MGI Symbol;Acc:MGI:1919199]	Homeobox
ENSMUSG00000107689	3.42759	0	1.66266	0	0.268482	0.13331	Gm44386	6	86513891	86516273	-	429	lincRNA	predicted gene, 44386 [Source:MGI Symbol;Acc:MGI:5690778]	-
ENSMUSG00000106170	7.57958	0	0	0.910336	0.210049	0	Gm43393	5	60025690	60025883	-	194	processed_pseudogene	predicted gene 43393 [Source:MGI Symbol;Acc:MGI:5663530]	-
ENSMUSG00000018865	0	0.763746	0.360236	0.255231	0.536894	0.496977	Sult4a1	15	84076097	84105754	-	2512	protein_coding	sulfotransferase family 4A, member 1 [Source:MGI Symbol;Acc:MGI:1888971]	-
ENSMUSG00000027470	0	0.393034	2.33169	1.13846	0.38935	0.101744	Mylk2	2	152911352	152923068	+	2951	protein_coding	myosin, light polypeptide kinase 2, skeletal muscle [Source:MGI Symbol;Acc:MGI:2139434]	-
ENSMUSG00000025261	1.93797	3.63128	3.8493	2.92393	4.03746	3.37104	Huwe1	X	151800807	151935417	+	23507	protein_coding	HECT, UBA and WWE domain containing 1 [Source:MGI Symbol;Acc:MGI:1926884]	-
ENSMUSG00000049100	0.280735	0.0278837	0.240844	0.0785421	0.0051296	0.026417	Pcdh10	3	45378398	45435623	+	15888	protein_coding	protocadherin 10 [Source:MGI Symbol;Acc:MGI:1338042]	-
ENSMUSG00000017417	0.754082	2.1291	1.62375	1.77836	0.560172	0.527106	Plxdc1	11	97923238	97986444	-	4836	protein_coding	plexin domain containing 1 [Source:MGI Symbol;Acc:MGI:1919574]	-
ENSMUSG00000036825	7.83716	3.83608	6.7652	4.75749	8.75511	8.25105	Ssx2ip	3	146404642	146440144	+	4200	protein_coding	synovial sarcoma, X 2 interacting protein [Source:MGI Symbol;Acc:MGI:2139150]	-
ENSMUSG00000075122	2.57583	0.561693	0.980121	0.591657	0.308304	0.212358	Cd80	16	38455561	38496335	+	3703	protein_coding	CD80 antigen [Source:MGI Symbol;Acc:MGI:101775]	-
ENSMUSG00000060227	8.48264	15.2525	7.94391	11.9991	6.98762	5.31475	Casc4	2	121866970	121936220	+	5858	protein_coding	cancer susceptibility candidate 4 [Source:MGI Symbol;Acc:MGI:2443129]	-
ENSMUSG00000026208	17.3375	41.3036	65.6285	33.891	42.9987	40.6503	Des	1	75360329	75368579	+	3754	protein_coding	desmin [Source:MGI Symbol;Acc:MGI:94885]	-
ENSMUSG00000105779	3.19613	0.196638	1.83415	0.397998	0.975573	0.612127	Gm6439	3	150515220	150516081	-	862	processed_pseudogene	predicted gene 6439 [Source:MGI Symbol;Acc:MGI:3647442]	-
ENSMUSG00000035910	0.159461	1.36093	1.42662	1.73691	2.62061	4.56819	Dcdc2a	13	25056004	25210706	+	8284	protein_coding	doublecortin domain containing 2a [Source:MGI Symbol;Acc:MGI:2652818]	-
ENSMUSG00000115917	5.25356	0	0	2.39672	0	0	Gm49406	15	81485972	81486381	-	410	processed_pseudogene	predicted gene, 49406 [Source:MGI Symbol;Acc:MGI:6155031]	-
ENSMUSG00000006304	146.281	72.2301	70.408	74.132	70.969	59.3188	Arpc2	1	74236084	74268209	+	2033	protein_coding	actin related protein 2/3 complex, subunit 2 [Source:MGI Symbol;Acc:MGI:1923959]	-
ENSMUSG00000068040	4.63905	2.10515	3.18464	2.23703	3.13779	3.43058	Tm9sf4	2	153161303	153210466	+	7281	protein_coding	transmembrane 9 superfamily protein member 4 [Source:MGI Symbol;Acc:MGI:2139220]	-
ENSMUSG00000040606	2.70126	1.1375	1.22781	0.988606	1.99263	1.94295	Kazn	4	142102390	142239401	-	10721	protein_coding	kazrin, periplakin interacting protein [Source:MGI Symbol;Acc:MGI:1918779]	-
ENSMUSG00000032469	7.25487	2.65552	2.06594	3.70241	3.7891	5.06803	Dbr1	9	99575799	99584501	+	2488	protein_coding	debranching RNA lariats 1 [Source:MGI Symbol;Acc:MGI:1931520]	-
ENSMUSG00000029553	1.09877	0.172995	0.274366	0.37197	0.187585	0.151693	Tfec	6	16833373	16898441	-	5594	protein_coding	transcription factor EC [Source:MGI Symbol;Acc:MGI:1333760]	bHLH
ENSMUSG00000032556	0	0.68062	0.603557	0.221574	0.296938	0.0252606	Bfsp2	9	103424924	103480420	-	1698	protein_coding	beaded filament structural protein 2, phakinin [Source:MGI Symbol;Acc:MGI:1333828]	-
ENSMUSG00000025357	2.92112	7.22112	17.2832	5.08961	5.84686	5.16526	Dgka	10	128720134	128744855	-	4762	protein_coding	diacylglycerol kinase, alpha [Source:MGI Symbol;Acc:MGI:102952]	-
ENSMUSG00000040659	52.5931	26.638	27.6589	21.3755	24.5744	23.1901	Efhd2	4	141858142	141874920	-	2381	protein_coding	EF hand domain containing 2 [Source:MGI Symbol;Acc:MGI:106504]	-
ENSMUSG00000040407	0.482835	1.01818	1.18888	1.07608	1.95015	2.25392	Akap9	5	3928054	4081310	+	21350	protein_coding	A kinase (PRKA) anchor protein (yotiao) 9 [Source:MGI Symbol;Acc:MGI:2178217]	-
ENSMUSG00000053286	1.03949	2.55935	3.87276	2.85827	3.05009	3.21976	Trmt1l	1	151428542	151458161	+	8211	protein_coding	tRNA methyltransferase 1 like [Source:MGI Symbol;Acc:MGI:1916185]	-
ENSMUSG00000073821	0	0.281163	0.435952	0.0646391	0.128516	0.290042	8030451A03Rik	4	63979854	64149924	+	4083	processed_transcript	RIKEN cDNA 8030451A03 gene [Source:MGI Symbol;Acc:MGI:1915353]	-
ENSMUSG00000033819	3.14736	10.0135	10.998	10.2349	17.6482	23.0039	Ppp1r16a	15	76671615	76694919	+	4119	protein_coding	protein phosphatase 1, regulatory subunit 16A [Source:MGI Symbol;Acc:MGI:1920312]	-
ENSMUSG00000035278	5.34391	14.8463	17.2787	12.2379	16.6823	20.4938	Plekhj1	10	80796099	80798626	-	1725	protein_coding	pleckstrin homology domain containing, family J member 1 [Source:MGI Symbol;Acc:MGI:1925920]	-
ENSMUSG00000007029	3.61244	6.77792	9.53755	5.00186	9.28717	8.8286	Vars	17	35000987	35016322	+	5608	protein_coding	valyl-tRNA synthetase [Source:MGI Symbol;Acc:MGI:90675]	-
ENSMUSG00000025779	6.10953	1.4579	2.33598	2.33322	1.24279	1.85804	Ly96	1	16688051	16709611	+	1021	protein_coding	lymphocyte antigen 96 [Source:MGI Symbol;Acc:MGI:1341909]	-
ENSMUSG00000076492	0	24.8182	0	0	0	0	Trbj2-1	6	41542754	41542803	+	50	TR_J_gene	T cell receptor beta joining 2-1 [Source:MGI Symbol;Acc:MGI:4439728]	-
ENSMUSG00000038146	0.957117	3.02199	3.94624	3.01579	2.07908	1.52816	Notch3	17	32120820	32166880	-	8044	protein_coding	notch 3 [Source:MGI Symbol;Acc:MGI:99460]	-
ENSMUSG00000101219	5.19617	0	0	0.3211	0.0730773	0	Gm20302	1	105574537	105574811	+	275	processed_pseudogene	predicted gene, 20302 [Source:MGI Symbol;Acc:MGI:5012487]	-
ENSMUSG00000024462	0.825885	2.78278	4.65988	2.29914	2.58639	2.90049	Gabbr1	17	37045966	37075067	+	7764	protein_coding	gamma-aminobutyric acid (GABA) B receptor, 1 [Source:MGI Symbol;Acc:MGI:1860139]	-
ENSMUSG00000109904	1.70895	0.0553161	0.261323	0.978548	1.98757	0.690161	Gm45819	7	110119990	110121740	+	1751	TEC	predicted gene 45819 [Source:MGI Symbol;Acc:MGI:5804934]	-
ENSMUSG00000091956	0.189612	3.78618	2.19316	4.52805	5.02783	4.93735	C2cd4b	9	67759437	67760930	+	1327	protein_coding	C2 calcium-dependent domain containing 4B [Source:MGI Symbol;Acc:MGI:1922947]	-
ENSMUSG00000034471	3.02959	6.92511	5.03476	4.38309	3.9315	3.8586	Caskin2	11	115799183	115813639	-	5177	protein_coding	CASK-interacting protein 2 [Source:MGI Symbol;Acc:MGI:2157062]	-
ENSMUSG00000033847	1.26178	0.142545	0.38136	0.604298	0.0594422	0.122429	Pla2g4c	7	13324655	13360672	+	3747	protein_coding	phospholipase A2, group IVC (cytosolic, calcium-independent) [Source:MGI Symbol;Acc:MGI:1196403]	-
ENSMUSG00000026389	0.176108	1.57128	1.02065	1.61395	0.743795	0.429804	Steap3	1	120190757	120272705	-	5715	protein_coding	STEAP family member 3 [Source:MGI Symbol;Acc:MGI:1915678]	-
ENSMUSG00000035829	0.160718	1.03333	1.15938	0.90442	0.77302	1.24391	Ppp1r26	2	28446800	28455508	+	5619	protein_coding	protein phosphatase 1, regulatory subunit 26 [Source:MGI Symbol;Acc:MGI:2685193]	-
ENSMUSG00000085891	0.594717	0.0184703	0.156874	0.154529	0.334788	0	Gm14634	X	12762278	12821492	+	2622	processed_transcript	predicted gene 14634 [Source:MGI Symbol;Acc:MGI:3705147]	-
ENSMUSG00000033214	0.224679	1.36178	1.78618	1.84351	0.231697	0.0217328	Slitrk5	14	111675097	111683141	+	5263	protein_coding	SLIT and NTRK-like family, member 5 [Source:MGI Symbol;Acc:MGI:2679448]	-
ENSMUSG00000067973	1.81345	0	0.0347158	0.958132	0	0	Gm6994	14	77479483	77506868	-	1163	antisense	predicted gene 6994 [Source:MGI Symbol;Acc:MGI:3647788]	-
ENSMUSG00000106759	2.83474	0	0.0723556	0	0.0540222	0	AC120011.1	5	151635991	151641268	+	744	unprocessed_pseudogene	vomeronasal 2, receptor 18 (Vmn2r18) pseudogene	-
ENSMUSG00000020684	4.97971	0.0452892	0.495336	0.522427	0.128024	0.164011	Rasl10b	11	83409137	83421039	+	4010	protein_coding	RAS-like, family 10, member B [Source:MGI Symbol;Acc:MGI:2685575]	-
ENSMUSG00000068323	0.75186	2.27952	2.46231	5.10309	7.66028	6.16827	Slc4a5	6	83219828	83304945	+	5804	protein_coding	solute carrier family 4, sodium bicarbonate cotransporter, member 5 [Source:MGI Symbol;Acc:MGI:2443220]	-
ENSMUSG00000050762	3.21169	0.181461	1.08161	0.678089	0.0862797	0.0528895	Prss27	17	24038144	24045954	+	1253	protein_coding	protease, serine 27 [Source:MGI Symbol;Acc:MGI:2450123]	-
ENSMUSG00000038740	1.20634	2.36745	2.12864	2.33057	2.82495	3.30196	Mvb12b	2	33729953	33887946	-	8741	protein_coding	multivesicular body subunit 12B [Source:MGI Symbol;Acc:MGI:1919793]	-
ENSMUSG00000101636	0	1.21671	0.00887741	0.211295	0	0	4930579H20Rik	10	27389866	27397225	+	1516	antisense	RIKEN cDNA 4930579H20 gene [Source:MGI Symbol;Acc:MGI:1923105]	-
ENSMUSG00000105906	1.80739	16.7097	13.9585	3.68788	22.7818	8.3555	Iglc1	16	19061618	19062071	-	454	IG_C_gene	immunoglobulin lambda constant 1 [Source:MGI Symbol;Acc:MGI:99546]	-
ENSMUSG00000030544	0	1.32266	0.306107	0.961484	2.21656	1.0406	Mesp1	7	79792241	79793788	-	1275	protein_coding	mesoderm posterior 1 [Source:MGI Symbol;Acc:MGI:107785]	bHLH
ENSMUSG00000110404	0	0.403663	0.867772	0.120274	0.0467097	0.106349	Rnf223	4	156130513	156133420	+	2908	protein_coding	ring finger 223 [Source:MGI Symbol;Acc:MGI:3588193]	-
ENSMUSG00000021314	0.752561	3.4566	2.97848	2.83345	1.60463	1.69444	Amph	13	18948205	19150921	+	4528	protein_coding	amphiphysin [Source:MGI Symbol;Acc:MGI:103574]	-
ENSMUSG00000062960	4.91443	12.8842	5.52098	13.2376	8.04382	6.68306	Kdr	5	75932827	75978458	-	9030	protein_coding	kinase insert domain protein receptor [Source:MGI Symbol;Acc:MGI:96683]	-
ENSMUSG00000090208	0	2.00071	0.464873	0.133388	0	0	Gm15851	1	133906531	133914822	+	662	antisense	predicted gene 15851 [Source:MGI Symbol;Acc:MGI:3801734]	-
ENSMUSG00000036599	0.742672	4.0483	2.52066	2.62836	3.16335	3.14163	Chst12	5	140505550	140525724	+	2362	protein_coding	carbohydrate sulfotransferase 12 [Source:MGI Symbol;Acc:MGI:1929064]	-
ENSMUSG00000091896	54.6461	33.9329	34.7024	39.1022	32.4289	38.6651	Ube2d2a	18	35771559	35807172	+	2483	protein_coding	ubiquitin-conjugating enzyme E2D 2A [Source:MGI Symbol;Acc:MGI:1930715]	-
ENSMUSG00000074149	0.581742	0	0.00546191	0.0477828	0	0.143443	Gm10634	9	88719629	88806264	+	2464	antisense	predicted gene 10634 [Source:MGI Symbol;Acc:MGI:3641833]	-
ENSMUSG00000110444	0.194366	0.686743	0.644892	0.473277	0.84397	0.537497	Gm10033	8	69366510	69395539	-	10690	transcribed_unprocessed_pseudogene	predicted gene 10033 [Source:MGI Symbol;Acc:MGI:3642803]	-
[truncated: 8,988 more rows]
