# Supplementary material for: Telomerase RNA component knockout exacerbates Staphylococcus aureus pneumonia by extensive inflammation and dysfunction of T cells
Source: eLife. 2024 Nov 28;13:RP100433. doi: 10.7554/eLife.100433 (PMC11604217; doi:10.7554/eLife.100433)
Supplement: Figure 2—source data 3. — List of relevant differentially expressed genes (DEGs). [file elife-100433-fig2-data3.xlsx]

## Sheet: Tabelle2
gene_name	Gene Number	ENSG	Tercko/ko mock vs Old mock	Tercko/ko S. aureus vs Young S. aureus	Tercko/ko S. aureus vs Old S. aureus	Tercko/ko S. aureus vs Tercko/ko mock
CHUK	1	ENSMUSG00000025199	-1.36265	0	0	0
NFKBIB	2	ENSMUSG00000030595	0	0	0	1.47999
NFKBIA	3	ENSMUSG00000021025	0	3.2031	3.56647	3.27058
NFKB1	4	ENSMUSG00000028163	0	0	0.705672	0
IL1B	5	ENSMUSG00000027398	0	5.50744	5.3779	5.40638
IL18	6	ENSMUSG00000039217	0	0	-3.74692	0
IL6	7	ENSMUSG00000025746	0	0	6.14441	0
TNF	8	ENSMUSG00000024401	0	3.60886	6.24119	0
CXCL1	9	ENSMUSG00000029380	0	9.83291	9.45782	9.44527
CXCL2	10	ENSMUSG00000058427	0	10.6869	12.2304	14.1947
CXCL3	11	ENSMUSG00000029379	0	13.5644	13.062	10.4217
CCL2	12	ENSMUSG00000035385	0	3.44154	5.23331	4.96491
CCL12	13	ENSMUSG00000035352	0	5.00585	2.27409	3.12064
CAMP	14	ENSMUSG00000038357	0	6.30329	7.48527	10.2714
NOD2	15	ENSMUSG00000055994	0	0	3.27153	0
TAB2	16	ENSMUSG00000015755	0	0.906468	1.04958	0
MAPK9	17	ENSMUSG00000020366	0.63171	0	0	0
MAPK10	18	ENSMUSG00000046709	4.35345	0	0	0
MAPK12	19	ENSMUSG00000022610	0	0	-1.88249	0
JUN	20	ENSMUSG00000052684	1.07796	0	1.14893	0
RBCK1	21	ENSMUSG00000027466	0	-1.04601	0	-1.09698
XIAP	22	ENSMUSG00000025860	0.844799	0	0	0
ERBIN	23	ENSMUSG00000021709	0	1.52229	0	0.855812
BIRC2	24	ENSMUSG00000057367	0	0	0	1.47418
BIRC3	25	ENSMUSG00000032000	0	2.7744	2.70429	2.78603
TRAF6	26	ENSMUSG00000027164	0	2.29975	1.75961	1.98322
TNFAIP3	27	ENSMUSG00000019850	0	4.59605	4.99685	4.48589
TBK1	28	ENSMUSG00000020115	0	1.47881	0	0
IKBKE	29	ENSMUSG00000042349	-1.28753	0	0	0
TANK	30	ENSMUSG00000064289	0	0	0	1.32777
ANTXR1	31	ENSMUSG00000033420	1.35367	0	0	0
NLRP1A	32	ENSMUSG00000069830	6.56705	0	0	0
CASP1	33	ENSMUSG00000025888	0	0	-2.39445	0
BCL2L1	34	ENSMUSG00000007659	0	1.68131	1.68644	1.42064
NLRP3	35	ENSMUSG00000032691	0	6.22614	5.23191	5.17841
P2RX7	36	ENSMUSG00000029468	0	-2.04874	-1.7202	0
GPRC6A	37	ENSMUSG00000019905	6.65149	0	0	0
PLCB3	38	ENSMUSG00000024960	-0.92133	0	-1.80243	0
PLCB4	39	ENSMUSG00000039943	0	0	0	1.00427
ITPR1	40	ENSMUSG00000030102	0	0	-1.0463	0
ITPR3	41	ENSMUSG00000042644	0	-2.34942	-2.15549	0
VDAC2	42	ENSMUSG00000021771	0	0	0	0.926571
MCU	43	ENSMUSG00000009647	-1.03976	0	0	0
MFN1	44	ENSMUSG00000027668	0	0	-0.937678	0
RIPK1	45	ENSMUSG00000021408	0	1.46344	1.39039	1.20242
NAMPT	46	ENSMUSG00000020572	0	1.23645	1.16665	1.03653
TXNIP	47	ENSMUSG00000038393	0	1.46212	0	1.21713
TXN1	48	ENSMUSG00000028367	0	0	0.872716	0
NEK7	49	ENSMUSG00000026393	0	1.17744	0	0
GPSM3	50	ENSMUSG00000034786	0	0	1.9223	0
IRGM1	51	ENSMUSG00000046879	0	1.64018	1.61478	1.69585
MEFV	52	ENSMUSG00000022534	0	0	4.28034	0
CASP8	53	ENSMUSG00000026029	0.857977	0	0	0
NLRP12	54	ENSMUSG00000078817	0	0	4.34625	0
NAIP6	55	ENSMUSG00000078942	0	-7.05929	-5.69134	0
NAIP2	56	ENSMUSG00000078945	-2.6089	0	0	0
GBP2	57	ENSMUSG00000028270	0	1.93399	1.55048	1.60159
GBP5	58	ENSMUSG00000105504	0	3.50922	2.59341	2.92203
IFI204	59	ENSMUSG00000073489	0	0	1.86949	0
TRP53BP1	60	ENSMUSG00000043909	-0.926612	-2.30081	-1.9862	0
RHOA	61	ENSMUSG00000007815	0	0.861959	0	0
GBP3	62	ENSMUSG00000028268	0	2.31268	1.74274	1.86219
CASP4	63	ENSMUSG00000033538	0	1.61016	0	1.79853
JAK1	64	ENSMUSG00000028530	0	0	0.997436	0.842329
TYK2	65	ENSMUSG00000032175	0	-2.41231	0	0
MYD88	66	ENSMUSG00000032508	0	1.61538	2.10234	2.21374
TLR2	67	ENSMUSG00000027995	0	3.09042	3.8782	3.19763
NFKBIZ	68	ENSMUSG00000035356	0	2.94143	3.41014	4.05972
