# Supplementary material for: Telomerase RNA component knockout exacerbates Staphylococcus aureus pneumonia by extensive inflammation and dysfunction of T cells
Source: eLife. 2024 Nov 28;13:RP100433. doi: 10.7554/eLife.100433 (PMC11604217; doi:10.7554/eLife.100433)
Supplement: Figure 2—source data 4. — List of relevant significantly enriched KEGG pathways. [file elife-100433-fig2-data4.xlsx]

## Sheet: Tabelle1
KEGG pathway	Gene ratio	padj value	Count
IL-17 signaling pathway	0.0341176	5.83607e-05	29
TNF signaling pathway	0.0388235	5.83607e-05	33
NF-kappa B signaling pathway	0.0317647	0.00201467	27
Hematopoietic cell lineage	0.0270588	0.029268	23
NOD-like receptor signaling pathway	0.04	0.0298408	34
