# Supplementary material for: Telomerase RNA component knockout exacerbates Staphylococcus aureus pneumonia by extensive inflammation and dysfunction of T cells
Source: eLife. 2024 Nov 28;13:RP100433. doi: 10.7554/eLife.100433 (PMC11604217; doi:10.7554/eLife.100433)
Supplement: Figure 3—source data 1. — List of relevant differentially expressed genes (DEGs). [file elife-100433-fig3-data1.xlsx]

## Sheet: Tabelle2
gene_name	Gene Number	ENSG	Tercko/ko mock vs Young mock	Tercko/ko mock vs Old mock	Tercko/ko S. aureus vs Young S. aureus	Tercko/ko S. aureus vs Old S. aureus	Tercko/ko S. aureus vs Tercko/ko mock
CD14	1	ENSMUSG00000051439	0	-1.03326	3.65321	4.14327	4.50856
Ly6c1	2	ENSMUSG00000079018	0	1.0232	0.924884	1.45013	0
MARCO	3	ENSMUSG00000026390	2.3326	1.83734	0	4.06552	0
NOS2	4	ENSMUSG00000020826	0	2.23542	0	0	0
PPARG	5	ENSMUSG00000000440	0	-1.90292	0	0	0
TLR2	6	ENSMUSG00000027995	0	0	3.09042	3.8782	3.19763
CD200R1	7	ENSMUSG00000022667	0	0	2.13576	2.47518	2.2134
CD80	8	ENSMUSG00000075122	0	0	0	3.00744	2.16129
CLEC7A	9	ENSMUSG00000079293	0	0	0	1.74184	0
ITGAM	10	ENSMUSG00000030786	0	0	2.20746	2.48175	0
PDCD1LG2	11	ENSMUSG00000016498	0	7.02486	0	0	0
Retnla	12	ENSMUSG00000061100	0	0	0	1.65783	0
TNF	13	ENSMUSG00000024401	0	0	3.60886	6.24119	0
CCL22	14	ENSMUSG00000031779	0	0	0	4.16629	3.08443
CD36	15	ENSMUSG00000002944	0	0.736119	0	0	0
IL1B	16	ENSMUSG00000027398	0	0	5.50744	5.3779	5.40638
IL6	17	ENSMUSG00000025746	0	0	0	6.14441	0
LGALS3	18	ENSMUSG00000050335	0	0	0	1.00134	0.923422
CCL2	19	ENSMUSG00000035385	0	0	3.44154	5.23331	4.96491
CD63	20	ENSMUSG00000025351	0	0	0	0	0.996976
CSF1	21	ENSMUSG00000014599	0	-1.49974	2.21798	1.90261	2.10613
CXCL2	22	ENSMUSG00000058427	0	0	10.6869	12.2304	14.1947
IRF4	23	ENSMUSG00000021356	0	0	-3.38473	0	0
PTPRC	24	ENSMUSG00000026395	0	0	-1.94556	0	0
STAT6	25	ENSMUSG00000002147	0	0	0	-1.27861	0
Chil3	27	ENSMUSG00000040809	0	0	0	2.54071	0
IL1R1	28	ENSMUSG00000026072	0	0	1.35781	1.18547	1.26192
