# Supplementary material for: Telomerase RNA component knockout exacerbates Staphylococcus aureus pneumonia by extensive inflammation and dysfunction of T cells
Source: eLife. 2024 Nov 28;13:RP100433. doi: 10.7554/eLife.100433 (PMC11604217; doi:10.7554/eLife.100433)
Supplement: Figure 3—source data 2. — List of relevant differentially expressed genes (DEGs). [file elife-100433-fig3-data2.xlsx]

## Sheet: Tabelle2
gene_name	Gene number	ENSB	Tercko/ko S. aureus vs Young S. aureus	Tercko/ko S. aureus vs Tercko/ko mock	Tercko/ko S. aureus vs Old S. aureus
CXCL1	1	ENSMUSG00000029380	9.83291	9.44527	9.45782
CXCL2	2	ENSMUSG00000058427	10.6869	14.1947	12.2304
CXCL3	3	ENSMUSG00000029379	13.5644	10.4217	13.062
CXCL5	4	ENSMUSG00000029371	4.04562	0	4.83889
PPBP	5	ENSMUSG00000029372	0	-1.04177	-2.00488
CXCL9	6	ENSMUSG00000029417	0	7.84874	0
CXCL10	7	ENSMUSG00000034855	6.36287	7.54401	0
CXCL11	8	ENSMUSG00000060183	0	7.2774	0
CXCL12	9	ENSMUSG00000061353	0	-1.52139	0
CXCL13	10	ENSMUSG00000023078	0	3.06919	0
CXCL16	11	ENSMUSG00000018920	1.88082	1.74055	2.13667
CXCL15	12	ENSMUSG00000029375	0	0	1.41998
CCL2	13	ENSMUSG00000035385	3.44154	4.96491	5.23331
CCL12	14	ENSMUSG00000035352	5.00585	3.12064	2.27409
CCL3	15	ENSMUSG00000000982	7.5349	7.30692	8.40364
CCL4	16	ENSMUSG00000018930	8.33303	5.345	5.49179
CCL6	17	ENSMUSG00000018927	0	0	1.97807
CCL7	18	ENSMUSG00000035373	3.43777	2.56923	2.47556
CCL8	19	ENSMUSG00000009185	0	0	-3.4971
CCL9	20	ENSMUSG00000019122	0	1.88158	2.68515
CCL17	21	ENSMUSG00000031780	0	2.8985	2.73108
CCL20	22	ENSMUSG00000026166	7.4037	10.3006	5.07546
CCL22	23	ENSMUSG00000031779	0	3.08443	4.16629
CCL25	24	ENSMUSG00000023235	0	-3.25084	-2.5929
CCL28	25	ENSMUSG00000074715	0	-6.03471	0
CXCR2	26	ENSMUSG00000026180	0	3.07228	5.13236
CXCR1	27	ENSMUSG00000048480	-7.26356	0	0
CXCR6	28	ENSMUSG00000048521	0	0	-2.4299
CCR9	29	ENSMUSG00000029530	0	0	2.69795
CCR1	30	ENSMUSG00000025804	4.42439	5.03347	3.36722
JAK2	31	ENSMUSG00000024789	1.79615	1.47222	0
STAT3	32	ENSMUSG00000004040	1.07613	1.11741	1.12139
GNAI3	33	ENSMUSG00000000001	1.33705	1.00883	1.24477
ADCY4	34	ENSMUSG00000022220	0	-2.03341	0
ADCY7	35	ENSMUSG00000031659	-1.9132	0	-1.02073
FGR	36	ENSMUSG00000028874	0	1.9229	2.63606
SHC2	37	ENSMUSG00000020312	-4.08088	-4.0358	0
SHC3	38	ENSMUSG00000021448	0	0	4.69852
SHC4	39	ENSMUSG00000035109	-6.56694	0	0
GRB2	40	ENSMUSG00000059923	0	0	0.793137
SOS2	41	ENSMUSG00000034801	0	0	0.8387
KRAS	42	ENSMUSG00000030265	1.1641	0	0
NRAS	43	ENSMUSG00000027852	0	0	1.02645
MAP2K1	44	ENSMUSG00000004936	0	0	0.763173
PIK3CD	45	ENSMUSG00000039936	-1.59645	0	0
PIK3R3	46	ENSMUSG00000028698	0	-2.1207	0
PRKCZ	47	ENSMUSG00000029053	0	0	-2.02876
NFKBIA	48	ENSMUSG00000021025	3.2031	3.27058	3.56647
NFKBIB	49	ENSMUSG00000030595	0	1.47999	0
NFKB1	50	ENSMUSG00000028163	0	0	0.705672
ITK	51	ENSMUSG00000020395	-3.27714	0	0
RAC1	52	ENSMUSG00000001847	1.07721	0	0
RAC3	53	ENSMUSG00000018012	0	0	-2.18584
CDC42	54	ENSMUSG00000006699	0	0	0.761852
RHOA	55	ENSMUSG00000007815	0.861959	0	0
ROCK2	56	ENSMUSG00000020580	1.2971	0	1.17438
GNB5	57	ENSMUSG00000032192	0	0	-1.99268
GNG3	58	ENSMUSG00000071658	0	0	3.77378
GNG8	59	ENSMUSG00000063594	-3.66841	0	0
GNG12	60	ENSMUSG00000036402	1.79155	1.26458	1.70082
DOCK2	61	ENSMUSG00000020143	-2.11315	0	0
BCAR1	62	ENSMUSG00000031955	0	0	1.59251
PLCB3	63	ENSMUSG00000024960	0	0	-1.80243
PLCB4	64	ENSMUSG00000039943	0	1.00427	0
RAP1A	65	ENSMUSG00000068798	1.36339	0.818234	1.38502
RAP1B	66	ENSMUSG00000052681	1.77935	1.53887	1.82674
NCF1	67	ENSMUSG00000015950	0	0	1.67068
GRK3	68	ENSMUSG00000042249	-0.961329	0	0
GRK4	69	ENSMUSG00000052783	0	0	-3.22688
GRK5	70	ENSMUSG00000003228	0	0	1.2285
