# Supplementary material for: Telomerase RNA component knockout exacerbates Staphylococcus aureus pneumonia by extensive inflammation and dysfunction of T cells
Source: eLife. 2024 Nov 28;13:RP100433. doi: 10.7554/eLife.100433 (PMC11604217; doi:10.7554/eLife.100433)
Supplement: Figure 4—figure supplement 1—source data 1. [file elife-100433-fig4-figsupp1-data1.xlsx]

## Sheet: Sheet0
	CD11c+	CD335+	F4/80+	CD19+	Ly-6G+
Young mice	0.0094	0.0026	0.0548	0.566	0.0121
	0.0066	0.0023	0.0462	0.542	0.0124
	0.0088	0.0121	0.0829	0.697	0.0204
Old mice	0.0168	0.0029	0.0354	0.649	0.0118
	0.0148	0.0014	0.045	0.617	0.0184
	0.0079	0.0011	0.0286	0.631	0.0346
Tercko/ko	0.0293	0.0017	0.0333	0.529	0.021
	0.0342	0.0024	0.058	0.648	0.0149
	0.0364	0.0019	0.045	0.6	0.0132
	0.0299	0.0011	0.0313	0.58	0.0102
	0.0238	0.00063	0.0236	0.533	0.0111
