# Supplementary material for: Telomerase RNA component knockout exacerbates Staphylococcus aureus pneumonia by extensive inflammation and dysfunction of T cells
Source: eLife. 2024 Nov 28;13:RP100433. doi: 10.7554/eLife.100433 (PMC11604217; doi:10.7554/eLife.100433)
Supplement: Figure 4—source data 1. — List of relevant differentially expressed genes (DEGs). [file elife-100433-fig4-data1.xlsx]

## Sheet: Tabelle3
gene_name	Gene Number	ENSG	Tercko/ko mock vs Young mock	Tercko/ko mock vs Old mock	Tercko/ko S. aureus vs Young S. aureus	Tercko/ko S. aureus vs Old S. aureus	Tercko/ko S. aureus vs Tercko/ko mock
CD2	1	ENSMUSG00000027863	0	0	-2.44756	0	0
CD4	2	ENSMUSG00000023274	0	0	-4.02978	0	0
CD5	3	ENSMUSG00000024669	0	0	-8.83841	0	0
CD27	4	ENSMUSG00000030336	0	0	-2.1845	0	0
CD28	5	ENSMUSG00000026012	0	0	0	-6.16513	0
CD44	6	ENSMUSG00000005087	0	0	0	1.53424	1.44857
TNFRSF9	7	ENSMUSG00000028965	0	0	5.28963	6.98319	6.90275
CTLA4	8	ENSMUSG00000026011	0	0	0	0	0
BTLA	9	ENSMUSG00000052013	0	0	0	0	0
PDCD1	10	ENSMUSG00000026285	-5.09941	0	-7.02822	-5.27938	0
ENTPD1	11	ENSMUSG00000048120	0	0	1.92052	2.48512	1.59992
IL1R1	12	ENSMUSG00000026072	0	0	1.35781	1.18547	1.26192
AHR	13	ENSMUSG00000019256	0	0.644637	0	0	0
IRF4	14	ENSMUSG00000021356	0	0	-3.38473	0	0
RORA	15	ENSMUSG00000032238	0	1.00137	0	0	0
RORC	16	ENSMUSG00000028150	0	0	0	-1.42849	0
CD247	17	ENSMUSG00000005763	0	0	-8.85749	-6.958	-7.37186
LCK	18	ENSMUSG00000000409	0	0	-1.97555	0	0
STAT3	19	ENSMUSG00000004040	0	0	1.07613	1.12139	1.11741
