# Supplementary material for: Telomerase RNA component knockout exacerbates Staphylococcus aureus pneumonia by extensive inflammation and dysfunction of T cells
Source: eLife. 2024 Nov 28;13:RP100433. doi: 10.7554/eLife.100433 (PMC11604217; doi:10.7554/eLife.100433)
Supplement: Figure 4—source data 2. — Percentages of live CD3+ cells. [file elife-100433-fig4-data2.xlsx]

## Sheet: Sheet0
	CD3+
Young mice	0.361
	0.389
	0.212
Old mice	0.276
	0.274
	0.234
Tercko/ko	0.395
	0.269
	0.263
	0.325
	0.402
