# Supplementary material for: Telomerase RNA component knockout exacerbates Staphylococcus aureus pneumonia by extensive inflammation and dysfunction of T cells
Source: eLife. 2024 Nov 28;13:RP100433. doi: 10.7554/eLife.100433 (PMC11604217; doi:10.7554/eLife.100433)
Supplement: Figure 4—source data 4. — Fragments per kilobase of transcript per million fragments mapped (fpkms) of the different mice cohorts for CD247, PDCD1, and CD4. [file elife-100433-fig4-data4.xlsx]

## Sheet: Tabelle1
mice	CD247	PDCD1	CD4
Young mock	0.285919	0	0.309184
Young mock	0.381114	0.503279	0.876018
Young mock	0.374729	1.52953	0.538337
Young S.aureus	0.965925	2.32292	1.35901
Young S.aureus	0.563056	0.179386	0.171733
Young S.aureus	4.11397	1.98734	9.18238
Old mock	0.507577	0	0.584846
Old mock	0.335768	0	0.115053
Old mock	0.563421	0.200016	1.19146
Old S.aureus	0.452534	0.156189	0.254194
Old S.aureus	0.554675	0.829581	1.49675
Old S.aureus	0.489393	0.316707	0.565966
Tercko/ko mock	0.572535	0.0376393	0.801748
Tercko/ko mock	0.217631	0	0.814975
Tercko/ko mock	1.23608	0	0
Tercko/ko S.aureus	0	0	0
Tercko/ko S.aureus	0	0	0.608444
Tercko/ko S.aureus	0	0	0.0296081
