# Supplementary material for: Telomerase RNA component knockout exacerbates Staphylococcus aureus pneumonia by extensive inflammation and dysfunction of T cells
Source: eLife. 2024 Nov 28;13:RP100433. doi: 10.7554/eLife.100433 (PMC11604217; doi:10.7554/eLife.100433)
Supplement: Figure 4—source data 5. [file elife-100433-fig4-data5.xlsx]

## Sheet: gene_fpkm
gene_id	TERC_Sa_1	TERC_Sa_2	TERC_Sa_3	TERC_mock_1	TERC_mock_2	TERC_mock_3	WT_mock_1	WT_mock_2	WT_mock_3	WT_Sa_1	WT_Sa_2	WT_Sa_3	old_mock_1	old_mock_2	old_mock_3	old_Sa_1	old_Sa_2	old_Sa_3	gene_name	gene_chr	gene_start	gene_end	gene_strand	gene_length	gene_biotype	gene_description	tf_family
ENSMUSG00000064351	201776	107402	115588	18282	147178	158493	170327	113317	13724.3	83123.6	128521	21419.3	20419.4	21610.2	9749.35	34474.6	200939	16789.3	mt-Co1	MT	5328	6872	+	1545	protein_coding	mitochondrially encoded cytochrome c oxidase I [Source:MGI Symbol;Acc:MGI:102504]	-
ENSMUSG00000024653	29687.8	53365.6	7308.76	74936.4	68273.6	59641.4	41443.5	50737.4	323559	65182	71159.7	67733	21485.3	19398.6	8034.49	284998	55950.5	214932	Scgb1a1	19	9083636	9087958	-	476	protein_coding	secretoglobin, family 1A, member 1 (uteroglobin) [Source:MGI Symbol;Acc:MGI:98919]	-
ENSMUSG00000064370	201429	96261.6	133261	14572.9	116759	140362	147644	95328.5	17726.2	110457	110818	17592.2	23971.1	24996.5	16478.3	26610.7	147126	13866.5	mt-Cytb	MT	14145	15288	+	1144	protein_coding	mitochondrially encoded cytochrome b [Source:MGI Symbol;Acc:MGI:102501]	-
ENSMUSG00000064341	158174	75905.6	114384	12679.6	92924.3	106524	116479	72287.2	15515.6	109269	92726.2	13217	21277.3	21332	13227.3	20499.4	108232	11141.8	mt-Nd1	MT	2751	3707	+	957	protein_coding	mitochondrially encoded NADH dehydrogenase 1 [Source:MGI Symbol;Acc:MGI:101787]	-
ENSMUSG00000064345	98932.2	56635	56496.6	9017.35	66154.2	78093.3	81056.8	54865.4	11373.7	74986.4	64300.3	8979.93	19321.8	16794.7	10929.3	14163.3	73738.5	7205.37	mt-Nd2	MT	3914	4951	+	1038	protein_coding	mitochondrially encoded NADH dehydrogenase 2 [Source:MGI Symbol;Acc:MGI:102500]	-
ENSMUSG00000064363	81129.3	47611.8	52930.8	7785.33	55551.7	66753	64568.4	47351	9673.21	58839.8	53391.3	8305.47	10998	11143.2	5617.01	12376.3	68848.8	6677.85	mt-Nd4	MT	10167	11544	+	1378	protein_coding	mitochondrially encoded NADH dehydrogenase 4 [Source:MGI Symbol;Acc:MGI:102498]	-
ENSMUSG00000064368	67045.8	29953.3	54888.7	5352.69	40930.6	46933.1	49637.1	29632.7	7284.44	47352.8	34750	6098.49	18295.3	11404.8	10464.3	10425.4	57705.8	6909.84	mt-Nd6	MT	13552	14070	-	519	protein_coding	mitochondrially encoded NADH dehydrogenase 6 [Source:MGI Symbol;Acc:MGI:102495]	-
ENSMUSG00000064367	39148.2	13480.7	21066.4	2533.45	18299.8	19539	22570.7	16370.1	1819.57	9333.43	15360	2999.68	10316.4	6606.89	5406.54	5052.26	32025.6	2378.73	mt-Nd5	MT	11742	13565	+	1824	protein_coding	mitochondrially encoded NADH dehydrogenase 5 [Source:MGI Symbol;Acc:MGI:102496]	-
ENSMUSG00000064337	16798.3	14051.7	17116.2	1856.72	16987	20917.1	19940.6	13106.4	3334.55	20607.6	14266	1971.2	9372.7	5857.07	4149.56	2748.66	16040.7	1506.45	mt-Rnr1	MT	70	1024	+	955	Mt_rRNA	mitochondrially encoded 12S rRNA [Source:MGI Symbol;Acc:MGI:102493]	-
ENSMUSG00000064339	26707.8	12934.5	18105.7	1891.61	16016.7	18393.1	18459.2	12565.6	2591.57	17776.2	13452.2	1742.61	7898.46	4688.87	4245.32	2673.63	17465.2	1434.35	mt-Rnr2	MT	1094	2675	+	1582	Mt_rRNA	mitochondrially encoded 16S rRNA [Source:MGI Symbol;Acc:MGI:102492]	-
ENSMUSG00000022097	14724.8	17710.7	5892.45	18172.6	6892.75	6440.03	7321.72	8133.83	4999.71	10450.3	18506.6	270.907	3407.02	1976.07	4035.08	2256.05	2652.37	4959.9	Sftpc	14	70520949	70524081	-	1034	protein_coding	surfactant associated protein C [Source:MGI Symbol;Acc:MGI:109517]	-
ENSMUSG00000064349	11112.5	6260.35	12679.6	1171.11	10678	11526.4	11276.3	5128.24	1697	20338.1	8020.63	968.987	8624.3	5328.76	3774.53	1615.92	10933.3	986.016	mt-Tc	MT	5192	5257	-	66	Mt_tRNA	mitochondrially encoded tRNA cysteine [Source:MGI Symbol;Acc:MGI:102490]	-
ENSMUSG00000064372	14182.2	7992.06	8761.06	1316.8	8962.16	11508.5	10884.8	6826.97	1455.26	9422.47	8963.68	1405.27	4500.89	3754.67	3029.36	2417.85	11505.4	1168.36	mt-Tp	MT	15356	15422	-	67	Mt_tRNA	mitochondrially encoded tRNA proline [Source:MGI Symbol;Acc:MGI:102478]	-
ENSMUSG00000076258	1608.72	3429.91	1788.6	1199.9	3408.06	3444.21	2780.01	4051.07	6810.28	46472.4	6715.75	4475.19	2344.72	1653.28	1170.89	484.426	1823.65	6073.83	Gm23935	16	11144125	11144181	+	57	miRNA	predicted gene, 23935 [Source:MGI Symbol;Acc:MGI:5453712]	-
ENSMUSG00000052305	3248.37	7030.84	4582.45	4054.57	9939.87	8583.45	6257.87	4901.25	1848.61	7141.91	6874.1	742.143	3583.75	1135.49	2758.18	858.566	6617.5	3055.16	Hbb-bs	7	103826534	103828096	-	768	protein_coding	hemoglobin, beta adult s chain [Source:MGI Symbol;Acc:MGI:5474852]	-
ENSMUSG00000024661	12540	2726.72	16472.9	1326.84	3416.67	3796.14	4117.37	2897.16	1341.65	4872.46	2941.49	1288.25	3625.57	2912.61	1455.17	2481.03	4144.95	2078.04	Fth1	19	9982703	9985092	+	866	protein_coding	ferritin heavy polypeptide 1 [Source:MGI Symbol;Acc:MGI:95588]	-
ENSMUSG00000069919	2742.28	5997.74	3871.32	2682.81	8649.27	6860.16	6381.91	3577.12	1478.45	6045.13	5205.58	581.849	3180.04	1993.01	2152.86	633.478	4572.27	2193.4	Hba-a1	11	32283511	32284465	+	812	protein_coding	hemoglobin alpha, adult chain 1 [Source:MGI Symbol;Acc:MGI:96015]	-
ENSMUSG00000064348	6351.37	3109.75	4997.14	570.919	5239.33	6285.08	5897.6	3007.26	742.276	8351.4	4362.63	456.629	3864.39	2472.55	1754.36	914.522	5726.12	414.957	mt-Tn	MT	5089	5159	-	71	Mt_tRNA	mitochondrially encoded tRNA asparagine [Source:MGI Symbol;Acc:MGI:102479]	-
ENSMUSG00000007892	3829.4	3921.9	3446.94	2002.65	4369.43	4349.44	4502.42	3696.67	2588.51	5884.47	4465.17	3290.15	3463.62	2969.69	1977.87	2444.17	3806.14	2584.94	Rplp1	9	61913284	61914542	-	499	protein_coding	ribosomal protein, large, P1 [Source:MGI Symbol;Acc:MGI:1927099]	-
ENSMUSG00000025150	1283.47	2078.31	686.592	1651.73	1795.35	1899.6	1331.39	1541.34	5688.58	1462.5	1951.18	3333.43	3644.08	5726.93	5268.04	10103.2	2313.61	6987.31	Cbr2	11	120729489	120732114	-	1327	protein_coding	carbonyl reductase 2 [Source:MGI Symbol;Acc:MGI:107200]	-
ENSMUSG00000049775	3590.38	3727.49	2987.81	2557.32	4126.47	3418.49	3662	2832.77	2086.16	4362.48	4105.16	2054.62	2057.25	2309.9	1863.99	1585.85	3286.36	2340.95	Tmsb4x	X	167207093	167209315	-	1371	protein_coding	thymosin, beta 4, X chromosome [Source:MGI Symbol;Acc:MGI:99510]	-
ENSMUSG00000064366	1835.42	2420.02	2103.44	376.52	3729.74	2832.38	4688.04	2588.14	1175.17	1157.64	2317.85	488.474	2090.44	1604.49	1339.33	448.345	3195.25	309.926	mt-Tl2	MT	11671	11741	+	71	Mt_tRNA	mitochondrially encoded tRNA leucine 2 [Source:MGI Symbol;Acc:MGI:102481]	-
ENSMUSG00000028081	1722.16	1835.93	1563.55	907.862	1960.23	1882.64	1957.21	1608.61	1152.52	1867.12	2052.01	1243.63	1581.7	1301.2	1402.59	992.575	1837.83	1188.08	Rps3a1	3	86137940	86142702	-	977	protein_coding	ribosomal protein S3A1 [Source:MGI Symbol;Acc:MGI:1202063]	-
ENSMUSG00000102070	2519.96	1702.7	3774.75	277.081	2007.01	2753.66	2172.5	3239.71	362.974	2547.5	2007.47	389.338	133.008	143.927	154.312	469.031	2967.62	241.027	Gm28661	1	24614885	24615565	-	681	unprocessed_pseudogene	predicted gene 28661 [Source:MGI Symbol;Acc:MGI:5579367]	-
ENSMUSG00000064354	2596.63	1575.77	3573.89	253.669	2112.8	2399.99	2312.22	1840.15	353.766	2492.63	2137.69	326.714	166.596	230.106	455.889	495.796	4039.82	321.648	mt-Co2	MT	7013	7696	+	684	protein_coding	mitochondrially encoded cytochrome c oxidase II [Source:MGI Symbol;Acc:MGI:102503]	-
ENSMUSG00000063457	1396.17	1858.8	1132.78	949.674	1908.54	1716.77	1902.93	1484.18	909.299	2148.32	1814.79	1359.34	1382.27	1147.95	1025.74	837.536	1536.19	922.816	Rps15	10	80292453	80294114	+	630	protein_coding	ribosomal protein S15 [Source:MGI Symbol;Acc:MGI:98117]	-
ENSMUSG00000038791	362.957	703.056	74.2054	692.923	740.883	789.184	513.606	676.016	2941.82	601.727	1214.64	3140.72	1479.09	2162	2061.86	3492.16	680.604	2235.76	Scgb3a2	18	43764289	43767399	+	880	protein_coding	secretoglobin, family 3A, member 2 [Source:MGI Symbol;Acc:MGI:2153470]	-
ENSMUSG00000037742	1513.86	1489.44	1227.22	738.881	1750.41	1685.01	1920.15	1651.22	674.524	1058.08	1468.18	1165.29	1634.22	1280.46	954.645	1020.17	2162.75	980.148	Eef1a1	9	78478449	78489151	-	2493	protein_coding	eukaryotic translation elongation factor 1 alpha 1 [Source:MGI Symbol;Acc:MGI:1096881]	-
ENSMUSG00000052974	43.5351	780.472	13.6181	860.444	948.567	867.303	281.202	541.938	2968.02	741.097	1067.2	1690.7	1118.12	2011.22	2937.49	3720.01	951.411	2225.45	Cyp2f2	7	27119909	27133660	+	2025	protein_coding	cytochrome P450, family 2, subfamily f, polypeptide 2 [Source:MGI Symbol;Acc:MGI:88608]	-
ENSMUSG00000064360	2252.11	1623.84	1724.49	254.253	1905.44	2085.83	2654.47	1880.74	513.952	1566.94	1815.3	232.501	394.212	810.672	422.392	392.743	2635.57	201.64	mt-Nd3	MT	9459	9806	+	348	protein_coding	mitochondrially encoded NADH dehydrogenase 3 [Source:MGI Symbol;Acc:MGI:102499]	-
ENSMUSG00000069917	1581.22	2830.38	1687.96	880.493	3713.86	1371.16	1124.94	952.397	489.958	934.785	1810.83	204.778	1523.54	797.532	1050.38	279.841	1533.7	488.201	Hba-a2	11	32296489	32297298	+	667	protein_coding	hemoglobin alpha, adult chain 2 [Source:MGI Symbol;Acc:MGI:96016]	-
ENSMUSG00000101249	986.294	973.857	1475.26	176.294	2190.26	2939.13	999.726	618.477	166.587	1085.37	7737.52	543.824	158.588	55.6296	96.9439	184.91	1123.47	114.132	Gm29216	1	24615706	24616197	-	492	unprocessed_pseudogene	predicted gene 29216 [Source:MGI Symbol;Acc:MGI:5579922]	-
ENSMUSG00000064357	1351.48	2304.3	1197.48	1450.64	1645.55	2803.54	2404.38	1583.48	161.662	1047.72	1253.35	106.657	120.991	108.407	89.438	302.683	2522.36	115.547	mt-Atp6	MT	7927	8607	+	681	protein_coding	mitochondrially encoded ATP synthase 6 [Source:MGI Symbol;Acc:MGI:99927]	-
ENSMUSG00000003477	525.797	1781.67	155.492	876.425	1275.98	1378.36	2350.16	1778.3	620.676	1101.92	1493.77	243.584	1390.2	1121.75	901.036	638.835	1900.6	899.241	Inmt	6	55170626	55175043	-	1600	protein_coding	indolethylamine N-methyltransferase [Source:MGI Symbol;Acc:MGI:102963]	-
ENSMUSG00000069516	2792.18	1931.92	1019.72	1464.63	921.373	962.305	1233.26	1698.08	436.622	1482.8	2209.53	762.206	780.57	377.934	542.739	393.985	670.273	653.294	Lyz2	10	117277331	117282321	-	1316	protein_coding	lysozyme 2 [Source:MGI Symbol;Acc:MGI:96897]	-
ENSMUSG00000060126	1304.98	1215.2	1141.73	690.132	1257.79	1277.9	1135.01	1087.79	731.831	1383.55	1586.77	825.793	1032.79	804.742	854.226	679.49	1073	722.295	Tpt1	14	75845093	75848525	+	2380	protein_coding	tumor protein, translationally-controlled 1 [Source:MGI Symbol;Acc:MGI:104890]	-
ENSMUSG00000034892	1429.76	1117.97	1175.71	587.021	1346.91	1367.25	1165.08	1139.4	597.989	1654.47	1141.89	1252.83	825.765	710.137	676.561	637.426	1239.61	632.06	Rps29	12	69157722	69159186	-	693	protein_coding	ribosomal protein S29 [Source:MGI Symbol;Acc:MGI:107681]	-
ENSMUSG00000064340	4131.5	1258.07	1496.23	176.767	1338.88	1415.57	1815.46	1163.24	97.2418	575.625	1240.22	134.043	866.486	508.074	495.836	217.844	1476.29	79.3259	mt-Tl1	MT	2676	2750	+	75	Mt_tRNA	mitochondrially encoded tRNA leucine 1 [Source:MGI Symbol;Acc:MGI:102482]	-
ENSMUSG00000038274	1147.96	1219.21	1185.3	691.275	1391.71	1140.23	1157.91	969.486	758.077	1440.62	1189.87	987.564	982.896	779.797	534.498	640.837	1194.28	788.942	Fau	19	6057888	6059524	+	815	protein_coding	Finkel-Biskis-Reilly murine sarcoma virus (FBR-MuSV) ubiquitously expressed (fox derived) [Source:MGI Symbol;Acc:MGI:102547]	-
ENSMUSG00000057863	1355.77	1033.48	979.039	727.007	1143.36	1105.09	1059.65	1109.66	611.615	1311.89	1199.85	1242.96	938.568	742.992	838.25	738.735	1179.52	750.622	Rpl36	17	56613416	56614243	+	383	protein_coding	ribosomal protein L36 [Source:MGI Symbol;Acc:MGI:1860603]	-
ENSMUSG00000017723	509.744	772.226	233.314	832.09	759.777	537.818	355.399	365.836	1772.1	758.567	1102.52	1280.05	733.834	1426.39	1819.09	2319.74	461.637	1645.6	Wfdc2	2	164562413	164568510	+	1140	protein_coding	WAP four-disulfide core domain 2 [Source:MGI Symbol;Acc:MGI:1914951]	-
ENSMUSG00000064369	4577.73	802.706	1212.83	216.879	1092.53	1446.94	1463.44	1183.77	76.7566	158.826	1333.01	200.702	710.646	378.414	33.568	279.6	1640.36	191.936	mt-Te	MT	14071	14139	-	69	Mt_tRNA	mitochondrially encoded tRNA glutamic acid [Source:MGI Symbol;Acc:MGI:102488]	-
ENSMUSG00000093674	1176.3	801.457	659.758	832.574	1254.34	1094.75	610.508	889.981	861.838	1034.52	1198.81	941.471	653.24	948.1	997.763	946.865	1111.61	879.291	Rpl41	10	128548114	128549305	-	1168	protein_coding	ribosomal protein L41 [Source:MGI Symbol;Acc:MGI:1915195]	-
ENSMUSG00000029580	1189.66	1067.32	1306.09	976.895	1009.21	944.747	899.337	931.973	767.99	1114.66	1176.66	872.097	677.741	575.384	817.598	522.953	738.23	742.406	Actb	5	142903115	142906754	-	2679	protein_coding	actin, beta [Source:MGI Symbol;Acc:MGI:87904]	-
ENSMUSG00000030218	573.292	797.054	371.817	1186.96	1167.49	1369.7	1240.8	1328.7	913.946	1057.4	1004.81	452.963	937.035	548.198	689.206	689.182	649.422	672.66	Mgp	6	136872435	136875823	-	1187	protein_coding	matrix Gla protein [Source:MGI Symbol;Acc:MGI:96976]	-
ENSMUSG00000027907	2114.22	727.147	1804.25	596.717	655.343	694.571	640.8	606.54	866.701	721.048	714.109	589.024	757.078	838.173	879.589	828.47	634.604	671.929	S100a11	3	93520488	93526287	+	511	protein_coding	S100 calcium binding protein A11 [Source:MGI Symbol;Acc:MGI:1338798]	-
ENSMUSG00000031722	868.808	562.432	454.699	648.389	646.015	914.077	281.687	448.881	1219.2	1165.73	1064.58	257.054	474.09	1483.29	1218.83	2076.81	348.394	957.844	Hp	8	109575128	109579172	-	1606	protein_coding	haptoglobin [Source:MGI Symbol;Acc:MGI:96211]	-
ENSMUSG00000057322	960.88	1175.61	848.434	641.866	993.747	782.334	784.064	896.222	627.304	1201.53	988.18	861.719	791.962	558.164	663.408	514.235	883.714	547.413	Rpl38	11	114668524	114672331	+	542	protein_coding	ribosomal protein L38 [Source:MGI Symbol;Acc:MGI:1914921]	-
ENSMUSG00000073940	492.64	1030.39	757.374	622.742	1936.23	1551.92	1166.24	818.965	273.19	1261.52	1250.9	123.076	672.15	337.669	470.596	135.843	1126.67	536.584	Hbb-bt	7	103812524	103813996	-	703	protein_coding	hemoglobin, beta adult t chain [Source:MGI Symbol;Acc:MGI:5474850]	-
ENSMUSG00000064358	896.045	895.054	1205.83	234.795	1610.2	1129.8	1059.35	1635.29	155.373	1560.49	959.008	134.358	175.159	115.213	217.909	274.606	1965.55	149.069	mt-Co3	MT	8607	9390	+	784	protein_coding	mitochondrially encoded cytochrome c oxidase III [Source:MGI Symbol;Acc:MGI:102502]	-
ENSMUSG00000100862	1550.8	1031.93	1479.39	143.305	1037.6	1234.81	1290.56	1077.99	130.619	1090.32	1193.54	125.351	159.682	159.225	141.709	267.298	1703.73	131.625	Gm10925	1	24613974	24614651	-	678	unprocessed_pseudogene	predicted gene 10925 [Source:MGI Symbol;Acc:MGI:3809095]	-
ENSMUSG00000067274	1298.26	762.409	1091.9	367.948	884.033	827.031	824.909	689.069	482.734	1018.39	914.682	759.4	666.887	589.125	519.363	477.041	746.315	515.13	Rplp0	5	115559467	115563727	+	1659	protein_coding	ribosomal protein, large, P0 [Source:MGI Symbol;Acc:MGI:1927636]	-
ENSMUSG00000024608	910.453	799.363	760.529	421.639	985.529	925.569	892.238	752.55	523.134	886.497	935.579	647.537	767.575	565.071	553.976	489.15	839.523	527.566	Rps14	18	60774510	60778546	+	1384	protein_coding	ribosomal protein S14 [Source:MGI Symbol;Acc:MGI:98107]	-
ENSMUSG00000039001	585.406	918.744	567.865	497.879	874.83	772.077	941.044	780.115	613.121	981.105	918.964	677.094	816.516	569.681	690.939	511.636	837.038	565.665	Rps21	2	180257377	180258445	+	810	protein_coding	ribosomal protein S21 [Source:MGI Symbol;Acc:MGI:1913731]	-
ENSMUSG00000075014	55.0146	218.733	26.9509	66.6452	85.6639	525.242	158.872	93.3867	5891.34	4424.36	841.93	45.7577	42.3491	237.469	37.7583	6.57696	47.9581	208.193	Gm10800	2	98666547	98667301	-	660	protein_coding	predicted gene 10800 [Source:MGI Symbol;Acc:MGI:3641657]	-
ENSMUSG00000031765	7042.11	66.4124	4545.73	37.9252	62.4402	32.7559	36.1294	47.0569	115.671	83.4226	91.1383	96.1404	92.6229	115.149	42.0318	134.513	66.6216	125.388	Mt1	8	94179082	94180327	+	1246	protein_coding	metallothionein 1 [Source:MGI Symbol;Acc:MGI:97171]	-
ENSMUSG00000049517	876.776	885.067	556.792	502.148	850.764	838.915	767.183	764.082	496.425	933.942	909.768	691.014	621.632	511.402	600.088	435.953	897.773	505.449	Rps23	13	90922958	90924950	+	1268	protein_coding	ribosomal protein S23 [Source:MGI Symbol;Acc:MGI:1913725]	-
ENSMUSG00000025492	2008.73	775.859	1435.73	461.578	712.732	645.027	809.228	684.019	246.383	810.391	512.343	225.93	978.654	379.736	375.277	328.298	614.352	339.339	Ifitm3	7	141009586	141010770	-	678	protein_coding	interferon induced transmembrane protein 3 [Source:MGI Symbol;Acc:MGI:1913391]	-
ENSMUSG00000056370	923.283	989.822	325.019	964.45	591.371	564.475	442.993	588.415	523.982	684.939	1051.9	95.7457	431.113	530.636	656.681	876.975	428.685	767.699	Sftpb	6	72304610	72314371	+	1968	protein_coding	surfactant associated protein B [Source:MGI Symbol;Acc:MGI:109516]	-
ENSMUSG00000046330	589.011	765.418	520.699	443.797	806.004	673.27	670.961	625.069	555.113	919.611	784.18	562.092	671.08	457.126	558.758	375.33	675.201	472.753	Rpl37a	1	72711290	72713813	+	1410	protein_coding	ribosomal protein L37a [Source:MGI Symbol;Acc:MGI:98068]	-
ENSMUSG00000090733	652.443	722.096	588.773	377.184	629.361	483.444	737.195	710.908	506.87	705.256	706.481	787.592	553.185	440.575	526.1	375.606	725.032	456.137	Rps27	3	90212522	90213651	-	1043	protein_coding	ribosomal protein S27 [Source:MGI Symbol;Acc:MGI:1888676]	-
ENSMUSG00000050708	586.484	570.569	743.719	337.035	631.52	691.38	764.725	599.008	359.732	933.945	566	326.129	498.793	761.716	442.624	556.007	760.565	533.181	Ftl1	7	45457944	45459884	-	1340	protein_coding	ferritin light polypeptide 1 [Source:MGI Symbol;Acc:MGI:95589]	-
ENSMUSG00000003970	673.835	692.774	595.494	362.391	702.127	733.7	675.45	632.673	386.264	724.296	671.369	565.005	599.911	506.075	429.713	457.734	650.696	424.707	Rpl8	15	76904078	76906314	+	1359	protein_coding	ribosomal protein L8 [Source:MGI Symbol;Acc:MGI:1350927]	-
ENSMUSG00000041571	462.817	749.716	293.584	445.091	779.475	837.42	758.819	594.603	344.461	875.35	700.112	305.716	676.691	584.91	445.767	375.331	626.682	413.309	Selenow	7	15917208	15922402	-	736	protein_coding	selenoprotein W [Source:MGI Symbol;Acc:MGI:1100878]	-
ENSMUSG00000056071	4173.82	134.303	4967.07	28.807	53.6925	50.7229	117.552	40.2606	16.6328	163.501	78.0419	2.93914	31.8878	27.6762	26.0477	28.5275	265.905	36.378	S100a9	3	90692632	90695721	-	522	protein_coding	S100 calcium binding protein A9 (calgranulin B) [Source:MGI Symbol;Acc:MGI:1338947]	-
ENSMUSG00000107176	612.144	684.803	521.264	352.056	682.237	746.245	544.235	593.485	316.093	831.799	686.699	602.944	527.465	416.58	452.145	410.905	665.593	394.972	Gm9794	6	66875321	66875743	-	423	processed_pseudogene	predicted pseudogene 9794 [Source:MGI Symbol;Acc:MGI:3642653]	-
ENSMUSG00000003429	570.24	615.002	506.088	363.135	767.25	747.324	641.651	571.261	374.293	718.508	692.028	658.127	562.384	437.539	415.238	336.293	702.089	352.896	Rps11	7	45122379	45124439	-	865	protein_coding	ribosomal protein S11 [Source:MGI Symbol;Acc:MGI:1351329]	-
ENSMUSG00000064346	714.16	460.511	331.413	79.6914	855.394	692.055	1337.6	682.697	129.587	1330.84	1030.03	95.814	360.237	417.406	338.658	97.1819	876.832	41.3578	mt-Tw	MT	4950	5016	+	67	Mt_tRNA	mitochondrially encoded tRNA tryptophan [Source:MGI Symbol;Acc:MGI:102471]	-
ENSMUSG00000018339	700.449	782.428	600.455	900.054	459.244	522.188	679.127	674.324	296.817	583.495	624.192	215.167	543.983	364.214	538.32	242.319	490.606	487.646	Gpx3	11	54902453	54910377	+	1813	protein_coding	glutathione peroxidase 3 [Source:MGI Symbol;Acc:MGI:105102]	-
ENSMUSG00000026238	340.648	717.993	278.117	391.094	655.041	747.031	631.464	638.593	493.799	734.826	708.768	307.503	631.366	512.35	483.699	419.3	565.007	444.204	Ptma	1	86526726	86530712	+	1462	protein_coding	prothymosin alpha [Source:MGI Symbol;Acc:MGI:97803]	-
ENSMUSG00000064350	1409.95	442.204	636.099	124.687	777.499	751.814	1265.24	648.431	98.4858	257.743	909.459	94.0062	260.861	286.843	306.009	129.576	1240.8	41.966	mt-Ty	MT	5260	5326	-	67	Mt_tRNA	mitochondrially encoded tRNA tyrosine [Source:MGI Symbol;Acc:MGI:102470]	-
ENSMUSG00000060802	774.997	456.637	480.851	648.05	591.229	460.313	657.3	600.663	214.029	391.945	363.525	927.673	888.481	359.633	315.259	335.374	740.111	444.929	B2m	2	122147686	122153083	+	860	protein_coding	beta-2 microglobulin [Source:MGI Symbol;Acc:MGI:88127]	-
ENSMUSG00000037563	614.931	582.977	506.563	329.91	685.915	625.793	641.697	554.995	336.319	676.512	652.32	626.506	475.028	407.517	364.145	352.066	598.294	360.92	Rps16	7	28350652	28353155	+	1266	protein_coding	ribosomal protein S16 [Source:MGI Symbol;Acc:MGI:98118]	-
ENSMUSG00000031320	545.046	554.1	382.22	282.091	655.549	700.113	670.153	576.809	294.059	594.446	552.683	494.123	602.133	424.075	395.42	332.346	637.326	389.632	Rps4x	X	102184941	102189394	-	1631	protein_coding	ribosomal protein S4, X-linked [Source:MGI Symbol;Acc:MGI:98158]	-
ENSMUSG00000017404	564.083	590.415	494.106	315.205	607.681	586.897	551.89	568.091	342.705	593.508	587.074	560.462	515.826	270.205	362.193	358.842	577.242	394.976	Rpl19	11	98026710	98030492	+	1022	protein_coding	ribosomal protein L19 [Source:MGI Symbol;Acc:MGI:98020]	-
ENSMUSG00000028495	612.798	504.082	541.65	232.749	606.752	617.287	630.128	506.042	314.337	520.961	586.338	495.796	503.246	401.175	359.718	347.516	591.188	346.654	Rps6	4	86854660	86857412	-	1586	protein_coding	ribosomal protein S6 [Source:MGI Symbol;Acc:MGI:98159]	-
ENSMUSG00000045128	574.278	569.226	490.563	296.444	614.614	579.762	618.099	502.446	322.379	618.637	571.848	485.677	411.868	387.791	368.717	304.772	598.807	346.36	Rpl18a	8	70894722	70897412	-	1739	protein_coding	ribosomal protein L18A [Source:MGI Symbol;Acc:MGI:1924058]	-
ENSMUSG00000021789	1016.3	795.919	408.229	620.52	369.724	344.978	351.275	481.156	371.214	684.445	924.126	85.9863	246.941	295.645	379.898	478.137	209.675	436.761	Sftpa1	14	41131782	41136452	+	2860	protein_coding	surfactant associated protein A1 [Source:MGI Symbol;Acc:MGI:109518]	-
ENSMUSG00000081895	526.709	520.401	425.465	217.67	585.277	601.108	691.076	526.474	220.421	544.51	612.997	369.117	520.856	396.31	407.439	323.713	653.308	317.186	Rpl17-ps10	7	72648757	72649311	-	555	processed_pseudogene	ribosomal protein L17, pseudogene 10 [Source:MGI Symbol;Acc:MGI:3642871]	-
ENSMUSG00000047675	501.23	569.359	347.765	315.891	574	532.57	526.131	538.308	373.45	623.201	622.691	446.294	414.006	419.317	419.729	343.15	514.265	370.264	Rps8	4	117153827	117156243	-	1726	protein_coding	ribosomal protein S8 [Source:MGI Symbol;Acc:MGI:98166]	-
ENSMUSG00000101111	537.41	604.092	732.898	80.6226	1081.75	930.168	627.119	558.911	90.9258	871.157	595.595	62.8563	94.0689	84.8906	97.179	151.222	721.978	67.3435	Gm28437	1	24613189	24613971	-	783	unprocessed_pseudogene	predicted gene 28437 [Source:MGI Symbol;Acc:MGI:5579143]	-
ENSMUSG00000000740	523.342	559.407	445.731	272.575	554.218	518.523	556.247	473.839	310.321	545.743	545.182	435.095	444.706	358.551	333.024	299.609	494.447	312.665	Rpl13	8	123102350	123105244	+	2595	protein_coding	ribosomal protein L13 [Source:MGI Symbol;Acc:MGI:105922]	-
ENSMUSG00000113948	377.441	527.78	283.635	303.379	597.783	474.353	526.655	419.437	406.944	491.866	756.981	440.779	503.08	326.347	428.076	263.167	452.329	345.565	Rpl17-ps3	12	67510756	67511311	+	556	processed_pseudogene	ribosomal protein L17, pseudogene 3 [Source:MGI Symbol;Acc:MGI:3642206]	-
ENSMUSG00000032399	498.053	510.376	395.435	280.205	512.366	540.893	555.784	522.336	262.546	333.415	457.479	485.318	404.593	396.303	330.872	338.603	647.838	300.028	Rpl4	9	64173375	64178666	+	2007	protein_coding	ribosomal protein L4 [Source:MGI Symbol;Acc:MGI:1915141]	-
ENSMUSG00000027483	82.454	0.366429	94.7312	12.2719	12.6985	87.1084	52.268	36.7499	16.9712	9.45762	51.1665	7265.13	2.02007	0.343149	2.30425	1.09261	17.4578	0.606628	Bpifa1	2	154142880	154149219	+	1545	protein_coding	BPI fold containing family A, member 1 [Source:MGI Symbol;Acc:MGI:1338036]	-
ENSMUSG00000019505	646.831	465.187	573.665	333.424	463.845	460.882	467.311	449.631	375.698	473.751	422.485	307.039	387.648	372.896	313.46	377.498	415.144	345.848	Ubb	11	62551171	62553213	+	1675	protein_coding	ubiquitin B [Source:MGI Symbol;Acc:MGI:98888]	-
ENSMUSG00000012848	449.053	506.277	366.332	257.689	547.273	493.69	587.848	457.758	302.328	527.439	526.842	445.237	413.615	316.257	360.801	281.278	473.182	303.859	Rps5	7	12922290	12926686	+	1734	protein_coding	ribosomal protein S5 [Source:MGI Symbol;Acc:MGI:1097682]	-
ENSMUSG00000060938	425.017	569.335	379.8	275.458	522.922	450.353	568.831	461.265	271.472	551.378	528.033	438.303	388.806	339.292	294.098	273.178	512.858	263.123	Rpl26	11	68901583	68906989	+	1444	protein_coding	ribosomal protein L26 [Source:MGI Symbol;Acc:MGI:106022]	-
ENSMUSG00000008682	350.2	419.567	291.326	215.596	463.884	477.563	480.314	444.309	274.087	448.154	488.208	312.199	463.668	382.129	293.875	308.668	502.422	295.37	Rpl10	X	74270812	74273135	+	2053	protein_coding	ribosomal protein L10 [Source:MGI Symbol;Acc:MGI:105943]	-
ENSMUSG00000058135	154.69	334.44	138.344	235.957	325.239	394.751	473.282	457.519	404.938	267.499	302.027	343.197	518.921	615.511	441.329	651.758	317.142	443.653	Gstm1	3	108012255	108017973	-	1473	protein_coding	glutathione S-transferase, mu 1 [Source:MGI Symbol;Acc:MGI:95860]	-
ENSMUSG00000061787	368.816	483.257	355.235	237.375	490.97	478.006	498.283	433.265	274.44	466.205	440.694	396.551	328.052	293.9	295.13	278.493	437.25	263.529	Rps17	7	81342732	81345254	-	1274	protein_coding	ribosomal protein S17 [Source:MGI Symbol;Acc:MGI:1309526]	-
ENSMUSG00000057841	621.648	319.614	489.172	151.134	462.358	445.279	455.243	407.402	212.865	442.099	391.513	515.98	420.24	290.2	208.405	276.527	483.052	216.908	Rpl32	6	115805505	115808747	-	963	protein_coding	ribosomal protein L32 [Source:MGI Symbol;Acc:MGI:98038]	-
ENSMUSG00000106106	391.811	186.301	505.743	55.2488	198.584	269.21	256.359	255.598	287.509	2691.41	543.001	220.52	272.502	156.405	77.2794	47.478	190.984	170.55	CT010467.1	17	39846353	39848827	-	2466	rRNA	18s RNA, related sequence 5	-
ENSMUSG00000025508	401.046	529.612	348.921	258.408	495.36	432.479	457.793	342.513	203.355	645.03	462.622	237.784	370.143	304.358	337.964	243.221	363.658	291.855	Rplp2	7	141447370	141451585	+	2072	protein_coding	ribosomal protein, large P2 [Source:MGI Symbol;Acc:MGI:1914436]	-
ENSMUSG00000035885	452.812	356.3	483.434	281.045	464.081	384.156	468.154	348.998	276.878	377.183	416.516	301.512	383.048	337.068	318.899	384.078	355.698	308.949	Cox8a	19	7215158	7217616	-	545	protein_coding	cytochrome c oxidase subunit 8A [Source:MGI Symbol;Acc:MGI:105959]	-
ENSMUSG00000064057	434.549	7.73148	76.6586	51.0815	14.3838	43.6286	49.1055	128.319	143.011	12.4951	346.986	5261.17	18.4408	3.43543	4.01668	13.3079	7.00246	2.31687	Scgb3a1	11	49663610	49665118	+	598	protein_coding	secretoglobin, family 3A, member 1 [Source:MGI Symbol;Acc:MGI:1915912]	-
ENSMUSG00000006333	339.004	380.864	333.904	223.692	449.74	467.57	422.244	325.9	205.043	475.62	373.578	336.795	404.558	302.264	297.033	259.347	399.418	286.637	Rps9	7	3703993	3706897	+	2522	protein_coding	ribosomal protein S9 [Source:MGI Symbol;Acc:MGI:1924096]	-
ENSMUSG00000032518	389.053	367.808	365.521	190.833	425.306	386.048	408.29	344.101	234.532	473.204	389.609	435.28	393.775	304.74	270.29	228.66	373.174	267.546	Rpsa	9	120127689	120132369	+	3170	protein_coding	ribosomal protein SA [Source:MGI Symbol;Acc:MGI:105381]	-
ENSMUSG00000028639	423.449	490.157	436.861	218.29	504.158	529.644	495.227	383.982	156.734	495.841	433.486	134.411	251.857	232.196	169.062	161.548	421.015	177.038	Ybx1	4	119277981	119294604	-	2531	protein_coding	Y box protein 1 [Source:MGI Symbol;Acc:MGI:99146]	CSD
ENSMUSG00000043716	344.412	404.672	275.458	215.836	455.105	398.097	388.686	392.613	245.347	369.045	423.137	329.877	389.162	284.32	289.153	239.54	404.135	252.823	Rpl7	1	16101295	16104662	-	2687	protein_coding	ribosomal protein L7 [Source:MGI Symbol;Acc:MGI:98073]	-
ENSMUSG00000025794	324.296	381.709	307.741	171.49	398.469	414.385	473.265	373.855	234.333	413.857	353.065	303.456	372.825	326.857	241.039	244.807	381.941	253.753	Rpl14	9	120571444	120574654	+	1651	protein_coding	ribosomal protein L14 [Source:MGI Symbol;Acc:MGI:1914365]	-
ENSMUSG00000050621	761.456	584.046	691.701	206.86	328.701	712.095	255.548	247.672	214.04	180.697	193.781	151.458	177.099	189.598	213.086	193.279	327.331	261.495	Rps27rt	9	114982366	114982739	-	374	protein_coding	ribosomal protein S27, retrogene [Source:MGI Symbol;Acc:MGI:3704345]	-
ENSMUSG00000030432	335.553	394.242	295.206	210.43	458.703	362.204	417.802	339.005	222.956	420.529	427.374	357.731	296.421	235.909	242.715	208.258	302.681	193.339	Rpl28	7	4792874	4795066	+	1840	protein_coding	ribosomal protein L28 [Source:MGI Symbol;Acc:MGI:101839]	-
ENSMUSG00000090841	493.618	364.099	379.566	286.438	352.076	338.315	298.674	308.962	250.689	343.449	406.289	264.86	280.209	178.891	291.028	242.101	292.889	277.294	Myl6	10	128490860	128494145	-	3187	protein_coding	myosin, light polypeptide 6, alkali, smooth muscle and non-muscle [Source:MGI Symbol;Acc:MGI:109318]	-
ENSMUSG00000079523	195.453	416.614	219.955	251.635	430.668	511.773	479.373	350.096	139.148	489.809	522.397	275.344	317.972	244.412	198.596	130.925	281.842	184.203	Tmsb10	6	72957347	72958748	-	1276	protein_coding	thymosin, beta 10 [Source:MGI Symbol;Acc:MGI:109146]	-
ENSMUSG00000059325	635.715	329.622	431.374	295.918	393.726	371.116	485.715	324.844	99.1936	292.223	275.875	48.4174	200.977	269.191	186.339	193.155	505.561	184.663	Hopx	5	77086988	77115121	-	1516	protein_coding	HOP homeobox [Source:MGI Symbol;Acc:MGI:1916782]	Homeobox
ENSMUSG00000024140	234.419	490.244	239.614	301.946	450.72	415.305	491.206	440.548	178.487	398.053	380.538	109.716	181.156	205.24	206.577	141.211	346.099	214.279	Epas1	17	86753907	86833410	+	5309	protein_coding	endothelial PAS domain protein 1 [Source:MGI Symbol;Acc:MGI:109169]	-
ENSMUSG00000056054	2046.88	92.86	2751.07	13.1366	59.6033	40.7573	55.8849	24.9385	7.75653	62.9251	44.3992	1.978	11.7925	19.8621	19.9629	14.2469	120.144	22.4299	S100a8	3	90668978	90670035	+	694	protein_coding	S100 calcium binding protein A8 (calgranulin A) [Source:MGI Symbol;Acc:MGI:88244]	-
ENSMUSG00000063316	360.931	360.58	279.201	204.373	321.169	329.836	313.846	292.233	250.514	374.387	351.252	281.122	261.7	247.986	256.6	221.36	288.686	215.986	Rpl27	11	101442298	101445529	+	1535	protein_coding	ribosomal protein L27 [Source:MGI Symbol;Acc:MGI:98036]	-
ENSMUSG00000097971	53.1489	107.932	42.2438	25.8803	88.1983	638.651	140.928	147.056	1141.45	2199.94	236.322	119.062	44.6469	54.5453	17.961	4.9803	70.8851	69.9439	Gm26917	17	39843013	39846341	+	3329	lincRNA	predicted gene, 26917 [Source:MGI Symbol;Acc:MGI:5504032]	-
ENSMUSG00000044533	489.139	266.155	482.934	136.376	323.581	338.704	361.576	285.946	166.909	403.772	303.016	261.375	276.135	240.421	166.859	210.286	288.991	187.114	Rps2	17	24718116	24721929	+	1830	protein_coding	ribosomal protein S2 [Source:MGI Symbol;Acc:MGI:105110]	-
ENSMUSG00000029375	375.269	546.881	111.634	522.919	263.676	276.168	311.283	367.45	263.653	479.792	675.338	13.591	192.383	141.358	255.076	111.479	89.4611	178.267	Cxcl15	5	90794534	90803067	+	2127	protein_coding	chemokine (C-X-C motif) ligand 15 [Source:MGI Symbol;Acc:MGI:1339941]	-
ENSMUSG00000071415	335.177	362.762	259.735	175.494	356.609	322.676	340.104	308.061	208.719	324.117	386.769	310.062	308.105	213.601	225.197	192.958	322.167	198.223	Rpl23	11	97777527	97782437	-	1770	protein_coding	ribosomal protein L23 [Source:MGI Symbol;Acc:MGI:1929455]	-
ENSMUSG00000062933	394.37	314.647	359.601	54.3346	384.614	377.984	373.707	364.203	109.149	334.802	352.102	224.284	104.034	304.845	238.359	280.404	369.734	173.144	Gm10123	9	96895658	96896147	+	490	processed_pseudogene	predicted pseudogene 10123 [Source:MGI Symbol;Acc:MGI:3704342]	-
ENSMUSG00000026822	3046.06	15.1444	1743.91	18.3756	8.32715	11.3253	12.1986	14.3075	9.43369	100.083	28.9062	1.47768	12.5332	26.7811	12.4442	8.27448	10.0482	10.9681	Lcn2	2	32384633	32388252	-	2623	protein_coding	lipocalin 2 [Source:MGI Symbol;Acc:MGI:96757]	-
ENSMUSG00000067288	286.796	331.533	260.369	194.908	388.698	276.754	294.722	286.199	224.115	408.649	392.329	322.168	274.818	210.174	226.416	187.62	298.396	195.342	Rps28	17	33819027	33824562	-	1464	protein_coding	ribosomal protein S28 [Source:MGI Symbol;Acc:MGI:1859516]	-
ENSMUSG00000023944	176.632	412.692	198.237	207.637	369.409	357.8	328.712	245.121	268.17	281.375	303.616	236.054	297.983	343.241	300.204	251.91	259.422	203.069	Hsp90ab1	17	45567775	45573271	-	2999	protein_coding	heat shock protein 90 alpha (cytosolic), class B member 1 [Source:MGI Symbol;Acc:MGI:96247]	-
ENSMUSG00000028416	399.063	293.139	469.732	141.33	376.198	332.421	462.468	225.109	109.092	198.664	240.648	105.231	201.281	309.148	203.079	202.855	567.965	167.529	Bag1	4	40936398	40948294	-	1349	protein_coding	BCL2-associated athanogene 1 [Source:MGI Symbol;Acc:MGI:108047]	-
ENSMUSG00000025362	261.572	323.217	212.007	157.897	353.223	328.332	331.215	301.281	220.544	392.638	314.747	328.958	282.679	209.971	196.683	194.533	285.807	196.833	Rps26	10	128624534	128626747	-	1544	protein_coding	ribosomal protein S26 [Source:MGI Symbol;Acc:MGI:1351628]	-
ENSMUSG00000031613	70.2995	439.261	161.088	290.446	427.3	318.635	442.292	490.045	115.764	320.449	332.843	30.8026	200.732	251.261	231.359	161.451	345.48	188.373	Hpgd	8	56294585	56321043	+	1683	protein_coding	hydroxyprostaglandin dehydrogenase 15 (NAD) [Source:MGI Symbol;Acc:MGI:108085]	-
ENSMUSG00000001025	571.186	316.405	596.113	255.529	258.337	276.834	277.029	191.785	138.206	285.812	256.389	224.319	260.884	144.321	167.867	101.966	265.783	191.377	S100a6	3	90612882	90624181	+	1367	protein_coding	S100 calcium binding protein A6 (calcyclin) [Source:MGI Symbol;Acc:MGI:1339467]	-
ENSMUSG00000014846	90.1647	221.184	61.8217	174.691	223.05	180.038	202.9	203.029	330.379	200.369	202.52	189.9	483.615	521.414	375.1	542.795	217.198	335.302	Tppp3	8	105467493	105471526	-	1848	protein_coding	tubulin polymerization-promoting protein family member 3 [Source:MGI Symbol;Acc:MGI:1915221]	-
ENSMUSG00000026879	142.987	169.075	90.9435	545.358	242.366	223.377	184.847	250.811	421.217	82.8388	197.727	309.427	236.561	296.948	369.429	443.983	202.55	343.719	Gsn	2	35256380	35307892	+	3157	protein_coding	gelsolin [Source:MGI Symbol;Acc:MGI:95851]	-
ENSMUSG00000083596	350.393	316.081	231.592	154.613	285.537	304.042	324.635	261.983	115.225	341.03	327.1	229.959	323.661	235.309	191.639	179.743	350.613	199.698	Rpl21-ps15	X	151215167	151215649	-	483	processed_pseudogene	ribosomal protein L21, pseudogene 15 [Source:MGI Symbol;Acc:MGI:3705426]	-
ENSMUSG00000035530	427.39	303.305	329.12	192.62	298.324	274.076	261.448	246.136	225.458	276.928	301.824	180.338	279.671	258.291	223.131	226.385	201.707	200.427	Eif1	11	100319885	100322096	+	2098	protein_coding	eukaryotic translation initiation factor 1 [Source:MGI Symbol;Acc:MGI:105125]	-
ENSMUSG00000036438	1062.3	206.334	823.127	136.919	189.538	189.115	227.742	200.02	135.709	95.6432	184.632	129.545	201.732	205.362	156.483	183.99	213.328	163.165	Calm2	17	87433412	87446935	-	1467	protein_coding	calmodulin 2 [Source:MGI Symbol;Acc:MGI:103250]	-
ENSMUSG00000041697	287.984	257.394	239.95	233.764	268.325	254.636	265.388	236.857	221.634	404.943	283.087	211.937	256.281	303.032	224.666	274.821	250.883	213.848	Cox6a1	5	115345642	115348981	-	702	protein_coding	cytochrome c oxidase subunit 6A1 [Source:MGI Symbol;Acc:MGI:103099]	-
ENSMUSG00000062997	311.304	316.521	226.447	170.341	335.654	297.552	298.906	283.052	177.074	310.148	331.242	272.894	253.616	229.037	186.017	173.579	310.433	169.533	Rpl35	2	39001580	39005624	-	1241	protein_coding	ribosomal protein L35 [Source:MGI Symbol;Acc:MGI:1913739]	-
ENSMUSG00000060143	94.957	806.199	624.879	29.6061	357.391	49.4432	873.652	181.894	37.9851	631.32	113.602	36.7996	495.425	56.9513	32.7278	23.7073	160.045	46.1616	Gm10076	14	105681828	105682211	+	384	lincRNA	predicted gene 10076 [Source:MGI Symbol;Acc:MGI:3704451]	-
ENSMUSG00000046364	261.175	327.761	207.86	166.932	342.478	301.896	325.165	286.363	177.934	346.517	346.214	272.229	243.971	179.174	202.618	170.174	282.329	177.762	Rpl27a	7	109519147	109522367	+	2774	protein_coding	ribosomal protein L27A [Source:MGI Symbol;Acc:MGI:1347076]	-
ENSMUSG00000099764	299.644	268.419	261.865	155.613	307.086	291.386	393.482	284.313	168.22	334.435	312.244	262.597	249.737	195.338	177.537	175.64	275.622	181.155	Rps10-ps2	16	20822145	20822640	-	496	processed_pseudogene	ribosomal protein S10, pseudogene 2 [Source:MGI Symbol;Acc:MGI:3645627]	-
ENSMUSG00000048758	281.201	288.011	274.595	157.287	324.873	325.074	320.453	281.69	162.388	336.81	274.163	264.155	258.329	187.924	172.065	167.106	266.557	168.21	Rpl29	9	106429454	106431568	+	1126	protein_coding	ribosomal protein L29 [Source:MGI Symbol;Acc:MGI:99687]	-
ENSMUSG00000041841	328.722	282.674	256.837	172.335	317.487	233.312	271.025	278.069	185.762	376.068	293.583	270.442	220.506	211.129	181.401	167.19	299.638	163.41	Rpl37	15	5116645	5119140	+	1684	protein_coding	ribosomal protein L37 [Source:MGI Symbol;Acc:MGI:1914531]	-
ENSMUSG00000027447	228.959	212.859	206.227	284.436	333.453	246.277	300.224	338.772	243.324	225.985	224.611	236.442	238.527	287.225	238.449	212.106	192.232	233.296	Cst3	2	148871722	148875692	-	1266	protein_coding	cystatin C [Source:MGI Symbol;Acc:MGI:102519]	-
ENSMUSG00000073702	347.792	249.457	232.582	156.477	343.554	299.814	298.198	311.928	146.69	263.655	322.953	295.18	215.037	182.344	132.781	171.943	344.213	150.2	Rpl31	1	39367842	39371911	+	1662	protein_coding	ribosomal protein L31 [Source:MGI Symbol;Acc:MGI:2149632]	-
ENSMUSG00000008668	280.224	287.612	235.07	145.696	282.762	283.878	295.157	280.328	185.671	317.893	335.234	298.619	228.059	168.802	170.864	160.125	291.661	178.801	Rps18	17	33951999	33956001	-	2491	protein_coding	ribosomal protein S18 [Source:MGI Symbol;Acc:MGI:98146]	-
ENSMUSG00000034994	193.29	263.821	187.617	207.256	304.942	274.286	294.739	247.082	110.827	236.031	228.761	231.74	300.605	227.641	217.224	254.613	350.623	211.753	Eef2	10	81176631	81182498	+	3324	protein_coding	eukaryotic translation elongation factor 2 [Source:MGI Symbol;Acc:MGI:95288]	-
ENSMUSG00000075706	229.889	269.548	187.933	208.767	257.817	222.505	234.125	206.312	217.46	306.279	316.426	157.376	250.349	269.003	238.595	226.118	246.751	227.479	Gpx4	10	80047166	80056439	+	1724	protein_coding	glutathione peroxidase 4 [Source:MGI Symbol;Acc:MGI:104767]	-
ENSMUSG00000071528	409.677	252.076	348.337	155.62	251.678	185.972	173.448	220.109	243.665	299.467	269.052	180.56	205.83	229.906	176.853	221.53	250.295	188.571	Usmg5	19	47083471	47090625	-	341	protein_coding	upregulated during skeletal muscle growth 5 [Source:MGI Symbol;Acc:MGI:1891435]	-
ENSMUSG00000076609	13.3032	45.5815	19.747	45.6755	55.4082	35.4456	50.2506	44.8152	15.8305	42.1357	15.4018	618.974	47.454	408.336	476.09	394.03	1360.1	514.042	Igkc	6	70726435	70726966	+	532	IG_C_gene	immunoglobulin kappa constant [Source:MGI Symbol;Acc:MGI:96495]	-
ENSMUSG00000028367	375.487	282.169	371.543	173.073	250.398	265.812	225.893	188.956	252.291	306.971	262.763	112.826	197.311	179.769	184.752	201.173	176.246	163.309	Txn1	4	57943373	57956411	-	1051	protein_coding	thioredoxin 1 [Source:MGI Symbol;Acc:MGI:98874]	-
ENSMUSG00000064365	153.854	283.067	269.111	36.3219	350.548	260.505	535.277	314.297	72.1073	256.104	217.117	54.745	438.47	225.769	162.846	72.5509	371.57	33.8429	mt-Ts2	MT	11613	11671	+	59	Mt_tRNA	mitochondrially encoded tRNA serine 2 [Source:MGI Symbol;Acc:MGI:102474]	-
ENSMUSG00000061477	238.379	264.523	250.964	141.989	292.146	274.148	279.71	261.402	164.124	265.92	261.851	296.647	195.298	169.047	168.632	152.053	275.294	144.191	Rps7	12	28630854	28635953	-	2015	protein_coding	ribosomal protein S7 [Source:MGI Symbol;Acc:MGI:1333818]	-
ENSMUSG00000068874	99.9749	182.36	144.957	134.853	170.885	181.378	134.797	190.901	373.343	165.096	181.967	236.918	217.374	257.21	333.534	437.167	229.687	383.24	Selenbp1	3	94933056	94944758	+	2273	protein_coding	selenium binding protein 1 [Source:MGI Symbol;Acc:MGI:96825]	-
ENSMUSG00000027712	321.389	274.093	218.404	196.674	274.657	274.669	352.561	257.851	127.083	214.542	235.68	93.995	230.002	232.152	162.518	152.164	258.659	153.115	Anxa5	3	36448923	36475894	-	1777	protein_coding	annexin A5 [Source:MGI Symbol;Acc:MGI:106008]	-
ENSMUSG00000080921	267.259	326.922	303.774	147.675	286.763	156.445	230.858	232.157	200.957	329.753	253.024	181.022	217.836	188.544	163.515	137.56	260.199	124.927	Rpl38-ps2	6	140746960	140747172	-	213	processed_pseudogene	ribosomal protein L38, pseudogene 2 [Source:MGI Symbol;Acc:MGI:3646625]	-
ENSMUSG00000064364	227.337	406.996	172.834	35.7798	336.099	258.316	572.665	325.533	149.025	151.176	210.14	30.7328	309.514	259.148	80.6634	52.1903	402.571	11.5559	mt-Th	MT	11546	11612	+	67	Mt_tRNA	mitochondrially encoded tRNA histidine [Source:MGI Symbol;Acc:MGI:102485]	-
ENSMUSG00000036751	275.113	228.959	210.601	173.76	301.406	220.918	180.969	202.672	231.405	289.642	220.051	162.581	218.843	235.317	211.494	206.413	196.918	191.086	Cox6b1	7	30616861	30626151	-	708	protein_coding	cytochrome c oxidase, subunit 6B1 [Source:MGI Symbol;Acc:MGI:107460]	-
ENSMUSG00000062825	327.852	184.487	315.023	149.237	224.418	266.139	265.981	220.158	202.489	190.097	205.931	201.887	236.614	186.844	182.704	182.295	192.341	221.072	Actg1	11	120345690	120348542	-	2658	protein_coding	actin, gamma, cytoplasmic 1 [Source:MGI Symbol;Acc:MGI:87906]	-
ENSMUSG00000061983	295.033	268.636	324.982	157.616	250.795	260.164	241.427	194.205	108.411	317.346	313.591	174.006	203.312	157.225	136.189	138.661	218.311	176.649	Rps12	10	23785183	23787275	-	2027	protein_coding	ribosomal protein S12 [Source:MGI Symbol;Acc:MGI:98105]	-
ENSMUSG00000075602	312.433	258.558	280.567	319.482	237.887	225.41	295.881	275.46	118.67	234.393	184.648	190.849	248.472	134.741	119.6	143.442	166.395	164.689	Ly6a	15	74994877	74998031	-	1205	protein_coding	lymphocyte antigen 6 complex, locus A [Source:MGI Symbol;Acc:MGI:107527]	-
ENSMUSG00000063856	250.267	250	248.287	167.696	291.214	262.797	234.446	191.618	143.339	240.945	262.043	167.298	238.438	176.507	170.885	176.097	243.16	183.868	Gpx1	9	108338903	108340343	+	1441	protein_coding	glutathione peroxidase 1 [Source:MGI Symbol;Acc:MGI:104887]	-
ENSMUSG00000031799	438.028	236.51	419.591	128.322	278.972	287.337	296.018	268.876	76.7732	172.452	185.863	70.7973	172.052	165.09	139.405	112.696	289.761	132.626	Tpm4	8	72134975	72153142	+	2203	protein_coding	tropomyosin 4 [Source:MGI Symbol;Acc:MGI:2449202]	-
ENSMUSG00000016559	846.303	138.775	455.737	130.703	171.372	146.431	161.042	158.624	129.884	137.59	151.003	112.007	241.44	175.898	154.13	193.548	184.866	179.43	H3f3b	11	116021912	116027962	-	2976	protein_coding	H3 histone, family 3B [Source:MGI Symbol;Acc:MGI:1101768]	-
ENSMUSG00000014294	194.201	285.541	181.574	171.577	275.24	186.06	203.655	207.171	183.664	249.649	309.091	186.767	236.926	238.551	197.14	179.812	204.981	177.033	Ndufa2	18	36742332	36744557	-	572	protein_coding	NADH:ubiquinone oxidoreductase subunit A2 [Source:MGI Symbol;Acc:MGI:1343103]	-
ENSMUSG00000079641	247.733	295.174	204.211	141.032	265.609	224.63	216.369	230.732	156.693	297.238	290.846	258.661	178.371	139.75	152.427	137.268	283.081	138.645	Rpl39	X	37082520	37085402	-	1434	protein_coding	ribosomal protein L39 [Source:MGI Symbol;Acc:MGI:1914498]	-
ENSMUSG00000026701	613.688	136.289	466.834	97.5943	154.043	157.173	164.926	150.412	226.311	142.266	142.719	124.334	168.986	191.349	226.016	211.325	244.527	235.616	Prdx6	1	161240112	161251219	-	4804	protein_coding	peroxiredoxin 6 [Source:MGI Symbol;Acc:MGI:894320]	-
ENSMUSG00000001289	201.534	291.934	187.12	144.141	269.14	219.587	254.473	212.078	145.058	259.551	277.501	148.87	257.92	189.066	176.462	146.613	253.567	161.654	Pfdn5	15	102326116	102331873	+	1394	protein_coding	prefoldin 5 [Source:MGI Symbol;Acc:MGI:1928753]	-
ENSMUSG00000006356	72.6392	284.955	90.2032	240.791	281.744	258.377	238.161	247.702	166.697	246.339	224.267	90.6357	252.444	262.683	201.261	233.17	197.856	197.108	Crip2	12	113140236	113145506	+	2099	protein_coding	cysteine rich protein 2 [Source:MGI Symbol;Acc:MGI:1915587]	-
ENSMUSG00000056201	325.421	217.411	331.768	163.094	258.326	226.822	280.619	224.057	116.735	230.799	213.749	168.907	183.496	149.545	140.576	130.899	203.681	144.632	Cfl1	19	5490455	5495201	+	2354	protein_coding	cofilin 1, non-muscle [Source:MGI Symbol;Acc:MGI:101757]	-
ENSMUSG00000060591	545.185	208.302	646.656	132.367	219.852	276.063	213.587	206.803	93.1856	210.663	150.467	78.838	128.758	127.583	112.372	86.4293	166.22	102.092	Ifitm2	7	140954837	140955987	-	655	protein_coding	interferon induced transmembrane protein 2 [Source:MGI Symbol;Acc:MGI:1933382]	-
ENSMUSG00000057036	302.511	267.553	170.735	56.4462	159.771	262.388	329.44	189.93	118.893	322.368	293.71	66.6542	257.429	162.84	154.567	149.636	279.609	149.048	Gm7536	3	24333068	24333511	+	444	processed_pseudogene	predicted gene 7536 [Source:MGI Symbol;Acc:MGI:3645137]	-
ENSMUSG00000065947	409.242	178.545	260.063	86.5856	323.782	273.536	325.533	466.785	33.9107	243.757	249.072	37.5197	134.742	74.9728	128.677	63.5367	362.433	20.855	mt-Nd4l	MT	9877	10173	+	297	protein_coding	mitochondrially encoded NADH dehydrogenase 4L [Source:MGI Symbol;Acc:MGI:102497]	-
ENSMUSG00000031818	227.407	188.894	211.495	163.542	217.673	185.737	191.061	161.451	190.002	196.898	199.464	194.449	243.014	219.933	232.615	246.523	181.086	216.761	Cox4i1	8	120668222	120674207	+	1550	protein_coding	cytochrome c oxidase subunit 4I1 [Source:MGI Symbol;Acc:MGI:88473]	-
ENSMUSG00000067038	184.688	211.44	263.651	110.73	283.092	237.661	314.602	207.708	125.489	259.825	278.467	195.906	196.134	199.885	119.734	105.566	199.7	114.577	Rps12-ps3	19	59322290	59322783	+	494	protein_coding	ribosomal protein S12, pseudogene 3 [Source:MGI Symbol;Acc:MGI:3704503]	-
ENSMUSG00000072940	155.32	275.878	164.858	134.218	270.15	246.015	218.325	259.021	157.935	235.627	226.963	198.796	190.894	165.676	167.689	180.005	210.547	137.19	Gm10443	6	86334031	86334240	+	210	processed_pseudogene	predicted pseudogene 10443 [Source:MGI Symbol;Acc:MGI:3704272]	-
ENSMUSG00000058546	302.804	243.297	210.43	127.448	213.033	180.394	234.019	258.34	84.9779	309.939	207.783	225.944	146.327	185.902	100.42	131.112	287.036	126.675	Rpl23a	11	78180932	78183584	-	847	protein_coding	ribosomal protein L23A [Source:MGI Symbol;Acc:MGI:3040672]	-
ENSMUSG00000062328	165.567	220.366	109.829	141.304	261.507	185.654	248.433	376.454	170.957	216.395	210.707	275.797	165.022	180.341	139.248	141.659	196.422	155.532	Rpl17	18	75000477	75003381	+	775	protein_coding	ribosomal protein L17 [Source:MGI Symbol;Acc:MGI:2448270]	-
ENSMUSG00000079435	201.916	244.64	149.026	129.815	252.157	217.11	260.709	217.955	146.576	242.698	277.669	191.309	189.88	129.498	183.777	131.834	212.388	156.375	Rpl36a	X	134585654	134588062	+	1655	protein_coding	ribosomal protein L36A [Source:MGI Symbol;Acc:MGI:1201789]	-
ENSMUSG00000020460	267.139	237.994	269.694	121.325	212.26	187.122	196.042	182.964	159.909	250.837	244.27	193.683	153.272	130.424	157.171	116.236	220.216	167.503	Rps27a	11	29545846	29548109	-	1972	protein_coding	ribosomal protein S27A [Source:MGI Symbol;Acc:MGI:1925544]	-
ENSMUSG00000064246	924.827	202.339	359.97	198.436	100.403	133.948	88.4735	154.183	92.861	414.7	278.675	14.4853	95.9456	90.3303	119.652	44.4211	53.5864	94.7239	Chil1	1	134182176	134190181	+	2804	protein_coding	chitinase-like 1 [Source:MGI Symbol;Acc:MGI:1340899]	-
ENSMUSG00000067870	183.974	308.777	220.126	81.1958	184.6	335.537	359.845	189.687	99.2263	237.647	161.2	132.766	266.231	206	137.415	88.3598	173.338	94.0043	Rpl31-ps8	15	90764279	90764656	-	378	processed_pseudogene	ribosomal protein L31, pseudogene 8 [Source:MGI Symbol;Acc:MGI:3647726]	-
ENSMUSG00000020267	212.256	217.927	133.755	146.454	196.84	195.959	216.667	174.985	175.837	156.715	262.572	131.68	241.075	212.871	216.282	200.018	186.013	176.877	Hint1	11	54866383	54870501	+	872	protein_coding	histidine triad nucleotide binding protein 1 [Source:MGI Symbol;Acc:MGI:1321133]	-
ENSMUSG00000062006	216.898	236.549	175.705	120.482	225.033	207.542	223.678	202.431	154.757	227.802	258.362	167.18	157.474	156.161	187.701	126.189	252.473	155.12	Rpl34	3	130726831	130730398	-	2643	protein_coding	ribosomal protein L34 [Source:MGI Symbol;Acc:MGI:1915686]	-
ENSMUSG00000100131	439.785	208.746	273.92	37.6073	239.961	303.138	313.555	245.151	18.6333	117.331	234.63	22.7221	82.9737	95.6989	236.594	65.244	468.602	24.3288	Gm28439	1	24611535	24612410	-	876	unprocessed_pseudogene	predicted gene 28439 [Source:MGI Symbol;Acc:MGI:5579145]	-
ENSMUSG00000047215	185.664	221.51	158.747	128.017	253.615	225.995	260.8	216.5	141.577	219.67	211.669	158.523	170.722	157.922	168.048	136.858	246.961	162.972	Rpl9	5	65388364	65391444	-	3081	protein_coding	ribosomal protein L9 [Source:MGI Symbol;Acc:MGI:1298373]	-
ENSMUSG00000023175	111.956	155.733	76.2083	241.999	176.777	154.648	112.553	127.537	218.733	207.878	204.535	200.693	214.72	244.405	271.778	350.333	116.1	222.326	Bsg	10	79704491	79711969	+	1814	protein_coding	basigin [Source:MGI Symbol;Acc:MGI:88208]	-
ENSMUSG00000015932	289.272	180.021	288.985	132.211	197.845	188.431	198.748	201.188	134.119	110.523	151.337	186.28	181.32	196.072	176.867	220.712	202.175	172.765	Dstn	2	143915320	143943324	+	1911	protein_coding	destrin [Source:MGI Symbol;Acc:MGI:1929270]	-
ENSMUSG00000030122	110.33	249.789	126.606	228.678	260.39	310.569	219.108	202.567	104.842	196.814	199.945	118.779	193.16	230.044	141.765	150.368	225.25	133.701	Ptms	6	124913681	124920103	-	1619	protein_coding	parathymosin [Source:MGI Symbol;Acc:MGI:1916452]	-
ENSMUSG00000059291	235.887	205.574	172.497	108.117	232.926	192.755	227.314	201.03	135.691	227.12	222.38	210.465	214.985	153.083	139.746	145.547	227.371	133.037	Rpl11	4	136028265	136053428	-	2697	protein_coding	ribosomal protein L11 [Source:MGI Symbol;Acc:MGI:1914275]	-
ENSMUSG00000019362	234.029	244.007	205.62	147.941	186.233	214.914	230.933	175.745	145.457	282.763	280.456	138.754	184.649	135.446	142.673	149.548	154.951	127.872	D8Ertd738e	8	84246238	84249719	-	616	protein_coding	DNA segment, Chr 8, ERATO Doi 738, expressed [Source:MGI Symbol;Acc:MGI:1289231]	-
ENSMUSG00000025290	214.894	263.399	167.983	127.278	238.48	238.496	200.908	201.405	131.747	274.124	261.838	197.994	164.077	95.9737	157.343	99.4245	212.657	133.485	Rps24	14	24487125	24496959	+	6256	protein_coding	ribosomal protein S24 [Source:MGI Symbol;Acc:MGI:98147]	-
ENSMUSG00000106037	218.776	216.8	232.204	118.624	221.784	213.521	176.946	187.834	129.733	245.709	256.826	243.18	169.381	106.493	144.421	126.328	239.915	130.611	Gm4332	3	119709516	119709861	+	346	processed_pseudogene	predicted gene 4332 [Source:MGI Symbol;Acc:MGI:3782515]	-
ENSMUSG00000069682	289.779	210.257	145.888	133.161	214.296	234.315	184.541	198.02	123.193	240.832	234.99	232.837	129.209	135.255	166.774	95.5127	243.994	144.067	Gm10275	10	29698746	29699380	-	635	transcribed_processed_pseudogene	predicted pseudogene 10275 [Source:MGI Symbol;Acc:MGI:3704354]	-
ENSMUSG00000024610	423.045	153.043	276.098	182.588	160.461	170.378	149.026	143.413	60.9609	178.882	183.174	386.278	207.084	150.072	117.178	115.361	132.595	142.103	Cd74	18	60803848	60812646	+	1410	protein_coding	CD74 antigen (invariant polypeptide of major histocompatibility complex, class II antigen-associated) [Source:MGI Symbol;Acc:MGI:96534]	-
ENSMUSG00000034467	31.269	112.175	7.08549	66.1764	118.375	58.5392	51.3202	77.0265	363.532	62.7151	139.897	161.57	378.713	390.472	363.043	484.913	172.337	268.17	Dynlrb2	8	116504974	116515915	+	556	protein_coding	dynein light chain roadblock-type 2 [Source:MGI Symbol;Acc:MGI:1922715]	-
ENSMUSG00000024248	179.609	241.03	117.506	111.246	301.904	238.159	225.705	208.4	94.4683	152.148	191.972	149.776	230.017	173.91	119.254	125.203	273.166	129.39	Cox7a2l	17	83501919	83514333	-	1147	protein_coding	cytochrome c oxidase subunit 7A2 like [Source:MGI Symbol;Acc:MGI:106015]	-
ENSMUSG00000096842	116.377	583.069	651.998	24.2146	193.293	92.7287	277.029	114.341	32.2804	438.531	65.1001	18.6344	393.906	34.8345	24.7456	16.2316	134.214	43.3617	Gm10736	13	111593534	111593611	-	78	processed_pseudogene	predicted gene 10736 [Source:MGI Symbol;Acc:MGI:3704412]	-
ENSMUSG00000023004	177.322	183.276	181.585	127.485	159.325	218.225	213.054	193.889	144.288	243.534	231.117	114.384	224.713	174.212	192.638	179.741	146.874	148.524	Tuba1b	15	98931425	98934565	-	1875	protein_coding	tubulin, alpha 1B [Source:MGI Symbol;Acc:MGI:107804]	-
ENSMUSG00000022108	156.332	184.118	107.014	277.785	173.978	128.071	186.325	209.67	186.676	134.016	174.543	187.774	183.392	172.832	217.979	195.1	128.616	210.788	Itm2b	14	73362226	73385289	-	2732	protein_coding	integral membrane protein 2B [Source:MGI Symbol;Acc:MGI:1309517]	-
ENSMUSG00000072235	198.398	145.223	136.264	141.077	169.172	175.076	125.839	178.27	156.31	168.164	189.973	125.244	178.987	286.805	204.661	312.579	125.415	178.774	Tuba1a	15	98949837	98953703	-	1803	protein_coding	tubulin, alpha 1A [Source:MGI Symbol;Acc:MGI:98869]	-
ENSMUSG00000084319	208.104	184.711	247.04	105.746	174.485	220.738	246.07	188.515	122.623	272.584	218.802	133.881	150.739	109.046	178.347	110.704	160.418	124.683	Tpt1-ps3	6	99877816	99878334	-	519	processed_pseudogene	tumor protein, translationally-controlled, pseudogene 3 [Source:MGI Symbol;Acc:MGI:2664997]	-
ENSMUSG00000061100	422.008	149.961	119.978	173.181	112.458	114.064	16.4183	63.0943	409.184	501.464	308.453	59.3147	59.0509	152.898	278.479	86.3569	27.3463	96.3296	Retnla	16	48842551	48844461	+	599	protein_coding	resistin like alpha [Source:MGI Symbol;Acc:MGI:1888504]	-
ENSMUSG00000028234	191.338	217.804	174.535	113.016	215.37	209.882	191.408	172.558	115.168	234.255	243.199	203.396	176.416	121.187	121.634	113.603	200.62	118.144	Rps20	4	3831334	3835665	-	4080	protein_coding	ribosomal protein S20 [Source:MGI Symbol;Acc:MGI:1914677]	-
ENSMUSG00000059534	176.511	230.072	155.562	140.747	180.385	194.621	152.508	147.121	182.566	248.216	208.48	164.609	142.037	183.946	163.417	166.414	150.999	138.088	Uqcr10	11	4701973	4704342	-	584	protein_coding	ubiquinol-cytochrome c reductase, complex III subunit X [Source:MGI Symbol;Acc:MGI:1913402]	-
ENSMUSG00000039105	273.142	192.618	289.877	159.336	184.182	162.955	156.332	163.457	137.54	192.818	218.812	83.4168	162.116	138.205	169.453	136.832	149.095	124.259	Atp6v1g1	4	63544772	63550750	+	1135	protein_coding	ATPase, H+ transporting, lysosomal V1 subunit G1 [Source:MGI Symbol;Acc:MGI:1913540]	-
ENSMUSG00000029614	174.728	210.858	164.508	112.922	203.358	193.243	204.816	191.65	124.539	221.994	211.771	188.474	163.781	136.931	133.595	121.672	197.999	128.387	Rpl6	5	121204481	121209241	+	3140	protein_coding	ribosomal protein L6 [Source:MGI Symbol;Acc:MGI:108057]	-
ENSMUSG00000056973	89.3641	128.529	33.9646	109.87	136.953	128.177	65.7784	88.0416	261.349	100.861	146.631	139.41	129.197	254.005	312.975	431.387	154.354	370.565	Ces1d	8	93166068	93197838	-	2369	protein_coding	carboxylesterase 1D [Source:MGI Symbol;Acc:MGI:2148202]	-
ENSMUSG00000004951	1017.89	134.166	711.879	83.3184	104.989	154.463	96.4631	70.4879	62.9909	75.0507	80.8169	74.1699	99.0222	82.9828	58.6599	54.9675	60.0873	54.3855	Hspb1	5	135887919	135889563	+	1031	protein_coding	heat shock protein 1 [Source:MGI Symbol;Acc:MGI:96240]	-
ENSMUSG00000060036	121.194	197.3	120.47	102.25	202.151	185.499	209.539	193.709	123.603	214.107	183.993	187.096	199.352	144.543	153.278	141.085	245.701	149.33	Rpl3	15	80077791	80091868	-	3175	protein_coding	ribosomal protein L3 [Source:MGI Symbol;Acc:MGI:1351605]	-
ENSMUSG00000047139	166.676	83.5668	287.483	59.6355	107.098	121.649	108.235	92.5123	199.861	72.2106	92.6817	240.291	268.042	310.598	182.293	334.159	139.439	185.79	Cd24a	10	43578284	43584265	+	2580	protein_coding	CD24a antigen [Source:MGI Symbol;Acc:MGI:88323]	-
ENSMUSG00000064359	228.519	124.882	382.718	28.8439	312.68	305.8	344.25	250.623	80.439	53.7207	212.141	45.7181	93.8344	39.9572	105.339	77.1342	316.958	25.1689	mt-Tg	MT	9391	9458	+	68	Mt_tRNA	mitochondrially encoded tRNA glycine [Source:MGI Symbol;Acc:MGI:102486]	-
ENSMUSG00000021660	287.891	166.736	226.815	112.37	161.059	177.434	182.96	155.329	153.775	178.268	202.672	130.758	185.414	130.407	153.91	123.316	157.652	137.011	Btf3	13	98309896	98317006	-	1739	protein_coding	basic transcription factor 3 [Source:MGI Symbol;Acc:MGI:1202875]	-
ENSMUSG00000044080	127.695	156.081	91.6851	93.1076	136.753	149.257	170.648	143.651	199.918	121.304	168.451	128.163	273.626	249.804	206.242	277.12	142.86	186.72	S100a1	3	90511034	90514392	-	694	protein_coding	S100 calcium binding protein A1 [Source:MGI Symbol;Acc:MGI:1338917]	-
ENSMUSG00000050732	395.388	156.946	333.602	89.1466	182.043	137.485	213.376	137.517	113.234	134.647	155.305	65.3748	109.931	158.493	120.047	115.412	278.191	108.231	Vamp8	6	72385223	72390703	-	2311	protein_coding	vesicle-associated membrane protein 8 [Source:MGI Symbol;Acc:MGI:1336882]	-
ENSMUSG00000101939	239.032	282.246	307.273	28.9522	231.391	259.813	259.765	194.778	49.0739	325.353	207.729	26.5652	123.433	30.35	68.5036	46.3088	282.735	27.1664	Gm28438	1	24612775	24613119	-	345	unprocessed_pseudogene	predicted gene 28438 [Source:MGI Symbol;Acc:MGI:5579144]	-
ENSMUSG00000076281	83.6752	59.593	75.3978	17.8423	67.8221	90.6371	0	61.9667	74.6374	1838.16	251.056	45.3327	111.943	72.0838	14.2975	11.6347	34.5715	78.6395	Gm24270	9	56223715	56223771	-	57	miRNA	predicted gene, 24270 [Source:MGI Symbol;Acc:MGI:5454047]	-
ENSMUSG00000008540	63.9722	96.9804	24.4334	120.622	97.5587	102.21	68.1908	91.3293	360.835	99.8914	146.076	132.014	210.617	260.078	331.846	361.763	114.901	295.591	Mgst1	6	138140316	138156755	+	2013	protein_coding	microsomal glutathione S-transferase 1 [Source:MGI Symbol;Acc:MGI:1913850]	-
ENSMUSG00000083061	171.539	257.038	172.552	14.2991	246.337	284.667	302.105	38.5689	94.5573	177.974	338.587	124.372	117.586	133.112	28.8415	119.538	205.622	145.2	Gm12191	11	49678710	49679057	-	348	processed_pseudogene	predicted gene 12191 [Source:MGI Symbol;Acc:MGI:3651293]	-
ENSMUSG00000026421	259.334	138.639	204.765	97.1555	154.111	243.261	255.431	193.986	70.577	182.599	143.843	119.74	218.138	162.424	78.5703	142.246	182.978	118.27	Csrp1	1	135720061	135752232	+	1956	protein_coding	cysteine and glycine-rich protein 1 [Source:MGI Symbol;Acc:MGI:88549]	-
ENSMUSG00000059070	186.087	163.203	180.65	98.4995	212.225	170.943	176.612	144.761	145.299	207.691	180.743	154.947	178.751	129.246	143	137.696	175.526	135.271	Rpl18	7	45715457	45720836	+	4043	protein_coding	ribosomal protein L18 [Source:MGI Symbol;Acc:MGI:98003]	-
ENSMUSG00000064361	117.653	195.649	266.849	26.7073	203.242	442.556	195.55	207.771	76.6086	163.604	234.204	56.9992	12.2393	91.6093	126.785	28.3712	412.951	25.7681	mt-Tr	MT	9808	9875	+	68	Mt_tRNA	mitochondrially encoded tRNA arginine [Source:MGI Symbol;Acc:MGI:102476]	-
ENSMUSG00000009927	253.908	157.89	230.774	86.8972	174.581	160.451	175.833	186.515	98.5027	193.01	198.946	159.067	129.511	132.27	99.4607	110.429	220.784	104.062	Rps25	9	44407139	44410427	+	2691	protein_coding	ribosomal protein S25 [Source:MGI Symbol;Acc:MGI:1922867]	-
ENSMUSG00000058558	170.849	184.354	133.846	91.8703	201.404	190.145	205.581	178.97	95.306	185.319	169.221	169.367	169.267	142.685	131.5	119.286	207.803	125.409	Rpl5	5	107900502	107909005	+	3920	protein_coding	ribosomal protein L5 [Source:MGI Symbol;Acc:MGI:102854]	-
ENSMUSG00000061232	207.833	105.68	115.443	261.328	74.3007	81.6151	83.8098	73.608	102.969	105.243	97.3507	448.779	356.486	108.782	159.695	154.051	135.203	192.717	H2-K1	17	33996017	34000333	-	2608	protein_coding	histocompatibility 2, K1, K region [Source:MGI Symbol;Acc:MGI:95904]	-
ENSMUSG00000081051	176.744	157.082	181.88	100.484	196.205	189.237	205.816	167.459	109.714	195.127	194.732	160.433	162.614	134.912	129.727	96.7346	187.177	101.989	Gm15427	1	95498621	95499151	+	531	processed_pseudogene	predicted pseudogene 15427 [Source:MGI Symbol;Acc:MGI:3642341]	-
ENSMUSG00000015656	242.64	278.547	240.619	118.027	203.989	183.301	109.82	130.391	160.262	137.631	163.971	189.763	122.167	139.536	149.65	81.7915	119.209	74.5354	Hspa8	9	40800984	40810087	+	4301	protein_coding	heat shock protein 8 [Source:MGI Symbol;Acc:MGI:105384]	-
ENSMUSG00000037805	162.778	170.935	144.474	110.878	183.752	178.993	199.652	175.588	120.645	175.676	193.402	211.92	151.95	139.111	103.252	125.215	170.075	126.339	Rpl10a	17	28328471	28331033	+	2431	protein_coding	ribosomal protein L10A [Source:MGI Symbol;Acc:MGI:1343877]	-
ENSMUSG00000040952	199.436	192.497	163.106	120.913	194.469	179.525	198.621	167.049	89.7882	203.118	179.623	135.782	123.849	120.122	114.688	96.7967	211.726	114.064	Rps19	7	24884371	24889806	+	4685	protein_coding	ribosomal protein S19 [Source:MGI Symbol;Acc:MGI:1333780]	-
ENSMUSG00000035242	117.646	163.075	122.32	124.045	205.27	187.223	179.668	122.961	129.114	198.567	162.64	105.245	205.98	179.174	145.143	154.87	132.839	147.976	Oaz1	10	80826656	80829290	+	2558	protein_coding	ornithine decarboxylase antizyme 1 [Source:MGI Symbol;Acc:MGI:109433]	-
ENSMUSG00000030744	157.63	170.673	137.781	91.9998	205.905	191.821	207.571	183.795	97.6106	165.786	166.659	162.579	164.038	125.017	120.564	103.955	215.442	112.586	Rps3	7	99477896	99483738	-	4483	protein_coding	ribosomal protein S3 [Source:MGI Symbol;Acc:MGI:1350917]	-
ENSMUSG00000095597	179.851	179.87	144.503	92.897	227.438	201.97	166.601	169.687	100.693	145.641	173.019	181.964	176.319	109.637	116.291	109.279	193.16	105.661	Gm6472	X	152909505	152910155	-	651	transcribed_processed_pseudogene	predicted pseudogene 6472 [Source:MGI Symbol;Acc:MGI:3648396]	-
ENSMUSG00000063882	158.208	180.778	121.31	114.28	166.416	161.317	152.96	129.063	153.432	177.858	217.095	142.926	169.493	137.309	139.53	133.688	153.229	130.353	Uqcrh	4	116066965	116075071	-	1237	protein_coding	ubiquinol-cytochrome c reductase hinge protein [Source:MGI Symbol;Acc:MGI:1913826]	-
ENSMUSG00000004044	93.0761	267.81	94.785	181.792	193.859	200.524	184.776	184.064	96.9649	214.235	204.395	56.5377	161.566	102.408	124.863	76.5922	151.694	117.534	Cavin1	11	100956733	100970887	-	3587	protein_coding	caveolae associated 1 [Source:MGI Symbol;Acc:MGI:1277968]	-
ENSMUSG00000068240	238.413	172.798	189.255	92.6065	225.125	168.623	190.732	145.594	74.2475	187.131	201.5	111.991	121.648	141.219	85.87	106.462	172.034	80.2864	Gm11808	4	3973092	3973595	-	504	protein_coding	predicted gene 11808 [Source:MGI Symbol;Acc:MGI:3649356]	-
ENSMUSG00000074457	185.824	237.727	210.484	133.225	166.815	178.84	203.189	185.506	105.562	232.793	217.535	43.6703	145.96	95.246	97.0318	60.1769	113.412	87.5473	S100a16	3	90537254	90543151	+	1617	protein_coding	S100 calcium binding protein A16 [Source:MGI Symbol;Acc:MGI:1915110]	-
ENSMUSG00000070493	156.499	171.828	183.989	102.899	152.147	158.245	160.675	149.791	136.606	180.535	184.627	87.6351	165.824	149.101	151.248	138.008	141.725	115.406	Chchd2	5	129881156	129887470	-	2269	protein_coding	coiled-coil-helix-coiled-coil-helix domain containing 2 [Source:MGI Symbol;Acc:MGI:1261428]	-
ENSMUSG00000021795	644.635	177.312	191.541	162.149	104.684	117.134	58.5693	108.104	130.073	176.488	220.162	38.6372	61.1491	79.596	102.005	120.802	49.8351	143.711	Sftpd	14	41172214	41185149	-	2417	protein_coding	surfactant associated protein D [Source:MGI Symbol;Acc:MGI:109515]	-
ENSMUSG00000046721	171.996	178.452	161.428	56.7912	176.717	160.805	164.181	167.545	61.0288	157.654	157.643	114.879	188.1	187.851	106.213	110.329	232.554	121.5	Rpl14-ps1	7	45324965	45325617	+	653	processed_pseudogene	ribosomal protein L14, pseudogene 1 [Source:MGI Symbol;Acc:MGI:3710579]	-
ENSMUSG00000090862	222.749	139.096	149.325	78.3263	182.554	162.899	177.634	147.663	106.666	187.519	176.474	171.73	165.001	104.319	132.088	98.6442	147.509	116.979	Rps13	7	116331505	116334195	-	2691	protein_coding	ribosomal protein S13 [Source:MGI Symbol;Acc:MGI:1915302]	-
ENSMUSG00000016427	153.854	140.745	130.492	127.257	156.157	152.585	139.837	134.456	144.222	185.068	224.199	147.14	117.855	144.562	144.544	145.614	142.267	122.151	Ndufa1	X	37187588	37191163	-	419	protein_coding	NADH:ubiquinone oxidoreductase subunit A1 [Source:MGI Symbol;Acc:MGI:1929511]	-
ENSMUSG00000000346	255.504	167.693	265.641	101.601	160.866	152.985	173.096	166.283	94.1581	159.976	155.279	67.7038	132.302	116.111	108.547	96.3789	167.117	107.649	Dazap2	15	100615349	100620761	+	2900	protein_coding	DAZ associated protein 2 [Source:MGI Symbol;Acc:MGI:1344344]	-
ENSMUSG00000054986	200.552	87.001	129.671	62.2587	145.699	147.158	170.606	109.236	73.3193	49.0861	70.3455	159.932	146.833	213.594	109.85	270.39	338.073	164.272	Sec14l3	11	4064841	4077736	+	2784	protein_coding	SEC14-like lipid binding 3 [Source:MGI Symbol;Acc:MGI:3617848]	-
ENSMUSG00000064347	325.547	254.35	484.44	16.8449	126.061	132.902	196.731	143.332	78.0149	127.542	331.162	12.2879	81.4178	31.6946	38.541	30.5813	223.118	11.2209	mt-Ta	MT	5018	5086	-	69	Mt_tRNA	mitochondrially encoded tRNA alanine [Source:MGI Symbol;Acc:MGI:102491]	-
ENSMUSG00000042312	175.157	200.456	151.771	128.066	173.558	146.138	177.454	171.542	95.2018	172.316	217.252	71.8835	158.112	128.741	145.534	94.1854	125.572	96.9441	S100a13	3	90514435	90524581	+	715	protein_coding	S100 calcium binding protein A13 [Source:MGI Symbol;Acc:MGI:109581]	-
ENSMUSG00000028692	194.304	150.9	162.921	106.549	162.577	180.351	202.534	154.289	103.146	169.427	140.542	97.0895	163.705	132.493	114.702	120.621	146.45	121.211	Akr1a1	4	116636510	116651680	-	2750	protein_coding	aldo-keto reductase family 1, member A1 (aldehyde reductase) [Source:MGI Symbol;Acc:MGI:1929955]	-
ENSMUSG00000060419	178.973	173.52	165.67	85.9042	242.383	144.387	163.328	169.797	85.6418	149.855	188.939	164.244	108.359	111.653	127.899	109.231	149.134	104.6	Rps16-ps2	5	129128077	129128517	-	441	processed_pseudogene	ribosomal protein S16, pseudogene 2 [Source:MGI Symbol;Acc:MGI:3704259]	-
ENSMUSG00000032060	224.904	157.897	146.823	116.26	193.881	177.537	247.06	153.918	61.5804	133.263	132.649	44.0324	112.967	140.069	82.4497	76.3087	257.647	81.5543	Cryab	9	50751325	50756636	+	1479	protein_coding	crystallin, alpha B [Source:MGI Symbol;Acc:MGI:88516]	-
ENSMUSG00000015452	193.019	141.511	202.795	561.59	142.826	109.914	131.139	94.1592	65.9385	114.627	143.542	11.7295	47.0363	70.604	126.073	77.6912	146.056	155.347	Ager	17	34597862	34600936	+	2141	protein_coding	advanced glycosylation end product-specific receptor [Source:MGI Symbol;Acc:MGI:893592]	-
ENSMUSG00000048076	173.961	139.704	197.785	115.225	152.071	147.459	177.636	154.794	101.868	127.575	154.297	86.9143	147.178	147.419	107.796	126.609	154.703	105.629	Arf1	11	59211412	59228270	-	2089	protein_coding	ADP-ribosylation factor 1 [Source:MGI Symbol;Acc:MGI:99431]	-
ENSMUSG00000041959	269.626	183.262	252.057	103.332	167.297	193.311	135.772	165.677	71.6362	159.744	205.101	81.2819	136.022	85.0253	78.8485	46.6094	110.154	68.4203	S100a10	3	93555080	93564643	+	1212	protein_coding	S100 calcium binding protein A10 (calpactin) [Source:MGI Symbol;Acc:MGI:1339468]	-
ENSMUSG00000007655	74.7829	218.081	69.1183	185.912	251.747	183.986	218.028	233.807	81.0248	118.218	185.338	51.8279	133.295	82.9152	108.501	54.6871	162.212	98.1587	Cav1	6	17306335	17341452	+	3444	protein_coding	caveolin 1, caveolae protein [Source:MGI Symbol;Acc:MGI:102709]	-
ENSMUSG00000054091	190.726	143.404	145.211	90.6482	168.881	135.059	123.827	118.904	153.138	178.929	158.682	64.7731	156.469	146.824	128.234	120.318	149.386	114.837	1810037I17Rik	3	122924203	122926184	+	1160	protein_coding	RIKEN cDNA 1810037I17 gene [Source:MGI Symbol;Acc:MGI:1914954]	-
ENSMUSG00000053279	47.4286	106.117	19.2353	78.9159	106.989	134.367	108.532	147.917	187.724	76.7297	106.33	267.213	159.024	189.316	149.593	268.587	129.027	197.991	Aldh1a1	19	20492715	20643462	+	4934	protein_coding	aldehyde dehydrogenase family 1, subfamily A1 [Source:MGI Symbol;Acc:MGI:1353450]	-
ENSMUSG00000025967	124.262	169.296	121.171	84.1199	149.474	172.466	161.436	135.941	115.798	161.652	148.859	143.176	144.19	129.269	132.692	102.815	162.269	114.009	Eef1b2	1	63176825	63180486	+	2532	protein_coding	eukaryotic translation elongation factor 1 beta 2 [Source:MGI Symbol;Acc:MGI:1929520]	-
ENSMUSG00000079017	250.886	185.247	93.8537	66.1325	126.288	154.822	104.41	85.0604	41.4425	249.248	263.96	114.06	272.181	108.065	63.4586	85.1596	146.836	57.9999	Ifi27l2a	12	103442167	103443680	-	463	protein_coding	interferon, alpha-inducible protein 27 like 2A [Source:MGI Symbol;Acc:MGI:1924183]	-
ENSMUSG00000035783	30.3217	62.992	21.5165	168.047	114.663	105.444	73.5737	125.438	174.28	99.4783	126.291	407.87	139.374	109.545	203.649	201.549	94.186	201.323	Acta2	19	34241090	34255336	-	1781	protein_coding	actin, alpha 2, smooth muscle, aorta [Source:MGI Symbol;Acc:MGI:87909]	-
ENSMUSG00000032231	173.277	161.626	185.869	108.79	142.392	134.074	119.061	126.17	113.189	155.187	151.038	86.8738	161.725	131.244	138.438	128.916	125.274	115.423	Anxa2	9	69453620	69491795	+	3731	protein_coding	annexin A2 [Source:MGI Symbol;Acc:MGI:88246]	-
ENSMUSG00000041736	136.727	124.61	146.641	106.996	160.005	171.801	150.376	119.557	112.35	168.416	130.448	92.8113	179.824	150.196	117.658	128.608	127.731	130.119	Tspo	15	83563592	83574203	+	1051	protein_coding	translocator protein [Source:MGI Symbol;Acc:MGI:88222]	-
ENSMUSG00000017778	118.894	179.2	155.162	110.347	136.98	118.081	106.672	146.078	146.701	194.234	157.853	105.666	143.188	127.15	124.202	126.814	144.396	102.324	Cox7c	13	86044816	86046904	-	1131	protein_coding	cytochrome c oxidase subunit 7C [Source:MGI Symbol;Acc:MGI:103226]	-
ENSMUSG00000028843	153.854	119.18	234.543	68.3082	178.225	183.59	218.991	127.13	56.7892	215.394	143.799	144.138	118.353	100.334	90.3823	69.8351	128.411	89.5399	Sh3bgrl3	4	134127406	134128789	-	821	protein_coding	SH3 domain binding glutamic acid-rich protein-like 3 [Source:MGI Symbol;Acc:MGI:1920973]	-
ENSMUSG00000018567	135.999	146.087	180.106	94.2912	135.483	130.559	152.862	129.916	93.1323	198.552	151.578	90.7111	187.231	129.954	89.46	119.368	158.827	94.2279	Gabarap	11	69991143	69994951	+	1844	protein_coding	gamma-aminobutyric acid receptor associated protein [Source:MGI Symbol;Acc:MGI:1861742]	-
ENSMUSG00000037071	88.4758	250.776	31.7704	475.076	159.998	123.763	151.719	156.885	93.0529	190.595	274.814	69.9206	64.8096	40.9737	89.306	38.1106	37.6919	72.7611	Scd1	19	44394451	44407709	-	4836	protein_coding	stearoyl-Coenzyme A desaturase 1 [Source:MGI Symbol;Acc:MGI:98239]	-
ENSMUSG00000068220	116.2	163.633	35.1662	105.024	161.827	246.301	163.211	143.357	83.9386	187.192	230.682	145.983	144.319	105.681	83.2199	73.308	119.751	88.9	Lgals1	15	78926725	78930465	+	903	protein_coding	lectin, galactose binding, soluble 1 [Source:MGI Symbol;Acc:MGI:96777]	-
ENSMUSG00000020585	179.367	108.724	89.8884	178.373	112.018	126.171	107.89	113.404	123.795	86.9094	104.079	135.879	178.69	118.45	159.014	173.522	112.324	179.615	Laptm4a	12	8921664	8938742	+	1773	protein_coding	lysosomal-associated protein transmembrane 4A [Source:MGI Symbol;Acc:MGI:108017]	-
ENSMUSG00000030157	276.253	170.198	258.738	128.669	158.315	138.528	159.983	166.923	53.9691	183.841	139.38	74.2916	75.6454	51.5741	79.3139	54.7719	136.36	67.1209	Clec2d	6	129180615	129186534	+	1213	protein_coding	C-type lectin domain family 2, member d [Source:MGI Symbol;Acc:MGI:2135589]	-
ENSMUSG00000006699	213.975	132.594	184.785	112.75	158.786	151.323	146.314	138.736	90.7163	161.287	164.508	77.0872	128.119	101.841	101.447	83.1563	126.815	91.6659	Cdc42	4	137319696	137357720	-	2966	protein_coding	cell division cycle 42 [Source:MGI Symbol;Acc:MGI:106211]	-
ENSMUSG00000078193	153.509	174.081	172.497	100.803	155.937	176.467	154.078	132.752	84.0915	145.523	195.54	141.174	66.2388	93.3745	110.46	85.3527	116.795	86.7188	Gm2000	1	156366040	156366484	+	445	protein_coding	predicted gene 2000 [Source:MGI Symbol;Acc:MGI:3780170]	-
ENSMUSG00000060803	108.938	147.329	40.8446	82.1921	113.882	111.414	140.527	110.582	107.238	196.096	83.5427	79.5755	214.115	165.545	137.573	203.086	119.256	175.325	Gstp1	19	4035407	4037921	-	757	protein_coding	glutathione S-transferase, pi 1 [Source:MGI Symbol;Acc:MGI:95865]	-
ENSMUSG00000057522	169.196	148.179	177.199	69.7923	203.573	193.43	200.691	151.14	58.9814	87.0965	105.285	49.4999	60.6837	146.135	94.2303	104.146	240.162	73.0758	Spop	11	95414080	95493406	+	3159	protein_coding	speckle-type POZ protein [Source:MGI Symbol;Acc:MGI:1343085]	-
ENSMUSG00000042712	100.591	161.141	90.5998	139.263	157.225	192.927	155.211	137.52	182.94	137.544	179.729	73.8576	97.6467	90.4909	142.575	102.148	92.2816	98.1212	Tceal9	X	136245079	136247139	+	1037	protein_coding	transcription elongation factor A like 9 [Source:MGI Symbol;Acc:MGI:109567]	-
ENSMUSG00000038900	213.036	137.469	128.438	78.3677	150.664	131.994	146.484	140.43	81.1764	147.955	150.879	184.838	106.27	92.2778	104.275	76.1402	160.746	94.3198	Rpl12	2	32961559	32965345	+	3598	protein_coding	ribosomal protein L12 [Source:MGI Symbol;Acc:MGI:98002]	-
ENSMUSG00000015093	209.801	147.407	139.434	128.706	148.79	130.179	171.364	87.6918	96.7751	119.12	109.703	25.8524	84.0906	119.051	124.82	120.518	203.97	155.066	Clic3	2	25456838	25458776	+	1012	protein_coding	chloride intracellular channel 3 [Source:MGI Symbol;Acc:MGI:1916704]	-
ENSMUSG00000060586	97.1986	107.983	60.799	106.91	134.848	92.505	122.136	93.8961	102.662	133.51	133.534	265.742	139.005	111.608	189.393	92.4191	141.365	192.597	H2-Eb1	17	34305877	34316199	+	1184	protein_coding	histocompatibility 2, class II antigen E beta [Source:MGI Symbol;Acc:MGI:95901]	-
ENSMUSG00000020849	147.144	134.405	154.245	99.6024	129.652	144.548	135.818	102.091	93.7202	106.171	144.301	74.6015	156.051	178.502	134.807	130.062	143.688	105.54	Ywhae	11	75732869	75765845	+	2568	protein_coding	tyrosine 3-monooxygenase/tryptophan 5-monooxygenase activation protein, epsilon polypeptide [Source:MGI Symbol;Acc:MGI:894689]	-
ENSMUSG00000030695	98.5176	122.296	88.1713	99.2957	116.5	120.55	116.912	123.217	119.989	129.311	124.523	160.624	157.153	156.035	134.895	176.869	122.907	142.575	Aldoa	7	126795234	126800751	-	2911	protein_coding	aldolase A, fructose-bisphosphate [Source:MGI Symbol;Acc:MGI:87994]	-
ENSMUSG00000030717	304.955	106.666	332.45	111.118	102.644	85.1805	105.511	91.815	102.813	75.8896	118.894	67.7886	150.216	107.472	150.004	119.834	79.7558	88.5177	Nupr1	7	126623249	126630861	-	2514	protein_coding	nuclear protein transcription regulator 1 [Source:MGI Symbol;Acc:MGI:1891834]	-
ENSMUSG00000018293	172.023	109.382	228.038	85.5415	136.511	141.778	142.258	108.643	74.1155	159.28	102.497	173.249	115.641	109.588	75.9936	103.105	112.919	86.1587	Pfn1	11	70651850	70654644	-	2405	protein_coding	profilin 1 [Source:MGI Symbol;Acc:MGI:97549]	-
ENSMUSG00000003380	79.3012	126.138	64.7457	132.815	102.167	94.6423	126.782	108.595	155.632	117.093	117.375	122.714	137.983	165.132	160.671	179.718	88.6306	146.891	Rabac1	7	24969752	24972754	-	1523	protein_coding	Rab acceptor 1 (prenylated) [Source:MGI Symbol;Acc:MGI:1201692]	-
ENSMUSG00000073411	194.838	78.1113	143.913	212.861	67.2666	73.4682	85.9338	81.5232	82.8505	83.2482	88.2876	249.276	265.134	101.243	99.5058	108.585	96.1314	114.348	H2-D1	17	35262730	35267499	+	2579	protein_coding	histocompatibility 2, D region locus 1 [Source:MGI Symbol;Acc:MGI:95896]	-
ENSMUSG00000036752	129.98	79.443	119.666	80.5066	62.9498	78.5587	71.9108	73.8815	142.709	46.6805	79.9211	120.389	143.329	268.891	173.316	279.558	85.0566	164.267	Tubb4b	2	25222160	25224702	-	2088	protein_coding	tubulin, beta 4B class IVB [Source:MGI Symbol;Acc:MGI:1915472]	-
ENSMUSG00000083411	151.194	113.39	61.2381	8.79262	177.696	193.551	223.14	20.6124	68.8079	216.769	166.954	101.925	146.907	123.756	19.6539	98.8597	179.95	122.249	Rpl30-ps10	X	71803688	71804034	+	347	processed_pseudogene	ribosomal protein L30, pseudogene 10 [Source:MGI Symbol;Acc:MGI:3646270]	-
ENSMUSG00000028691	97.8338	124.371	97.2536	83.1358	119.355	117.783	103.465	109.109	156.841	151.64	137.022	86.4276	159.521	142.864	134.738	142.51	104.138	127.378	Prdx1	4	116685544	116700822	+	3043	protein_coding	peroxiredoxin 1 [Source:MGI Symbol;Acc:MGI:99523]	-
ENSMUSG00000047459	129.152	127.085	125.887	85.1351	154.692	144.903	187.249	149.476	86.737	178.553	164.701	74.9068	95.751	111.524	78.9833	89.6266	133.414	71.1199	Dynlrb1	2	155236533	155250277	+	1009	protein_coding	dynein light chain roadblock-type 1 [Source:MGI Symbol;Acc:MGI:1914318]	-
ENSMUSG00000028936	90.4839	153.478	85.2596	85.1587	156.607	150.366	141.608	136.989	94.0707	158.973	161.115	110.777	129.92	98.9847	90.382	80.606	168.474	83.9209	Rpl22	4	152325742	152334071	+	2911	protein_coding	ribosomal protein L22 [Source:MGI Symbol;Acc:MGI:99262]	-
ENSMUSG00000043164	8.38034	22.93	1.83405	40.8875	45.2187	19.3015	11.027	16.8959	226.759	0	47.5481	140.578	206.421	296.089	260.949	440.125	160.316	218.488	Tmem212	3	27866066	27896368	-	716	protein_coding	transmembrane protein 212 [Source:MGI Symbol;Acc:MGI:2685410]	-
ENSMUSG00000030246	32.9268	88.586	5.32267	71.0012	93.0146	96.745	52.2297	87.9651	234.256	90.1089	108.348	60.4588	139.993	208.647	199.901	315.383	75.0733	196.948	Ldhb	6	142490249	142507957	-	1570	protein_coding	lactate dehydrogenase B [Source:MGI Symbol;Acc:MGI:96763]	-
ENSMUSG00000030057	213.906	119.125	149.343	103.211	123.641	126.478	131.032	138.184	85.7649	85.0465	127.074	88.3158	108.26	96.4372	117.389	107.65	128.556	105.471	Cnbp	6	87842615	87851106	-	3036	protein_coding	cellular nucleic acid binding protein [Source:MGI Symbol;Acc:MGI:88431]	-
ENSMUSG00000068396	65.6272	80.4954	199.641	44.325	240.251	207.966	266.465	78.3249	38.7515	228.43	58.3544	29.8817	271.742	71.3251	56.8264	78.1711	94.2842	41.0949	Rpl34-ps1	6	71124610	71124963	+	354	processed_pseudogene	ribosomal protein L34, pseudogene 1 [Source:MGI Symbol;Acc:MGI:3704270]	-
ENSMUSG00000022595	24.4717	60.0318	22.5046	46.8066	74.442	48.1251	14.4839	61.6427	288.089	67.4943	131.891	496.207	143.104	134.981	128.235	234.673	66.5686	107.665	Lypd2	15	74732247	74734329	-	679	protein_coding	Ly6/Plaur domain containing 2 [Source:MGI Symbol;Acc:MGI:1915561]	-
ENSMUSG00000020163	124.092	167.809	83.2493	98.1428	141.879	140.24	108.478	114.614	79.3733	140.142	153.573	111.864	115.773	133.058	100.573	138.26	107.982	90.0178	Uqcr11	10	80402997	80406830	-	641	protein_coding	ubiquinol-cytochrome c reductase, complex III subunit XI [Source:MGI Symbol;Acc:MGI:1913844]	-
ENSMUSG00000095041	81.4651	33.374	43.3238	47.9607	28.2551	38.4609	32.3898	24.0863	145.907	110.214	38.913	93.9816	213.73	316.232	249.116	283.278	122.754	225.844	AC149090.1	JH584304.1	52190	59690	-	4238	protein_coding		-
ENSMUSG00000023092	39.0228	138.535	22.4038	118.178	134.066	144.042	179.912	176.225	80.5112	88.4325	145.981	54.3544	159.011	106.811	105.453	101.261	186.797	134.702	Fhl1	X	56731787	56793346	+	3714	protein_coding	four and a half LIM domains 1 [Source:MGI Symbol;Acc:MGI:1298387]	-
ENSMUSG00000071644	56.8078	140.517	76.2194	82.1713	145.081	133.678	157.108	129.261	85.9548	156.849	136.799	111.123	136.258	113.527	103.107	100.636	153.383	96.0593	Eef1g	19	8967041	8978479	+	2600	protein_coding	eukaryotic translation elongation factor 1 gamma [Source:MGI Symbol;Acc:MGI:1914410]	-
ENSMUSG00000071866	115.742	127.654	119.822	99.2847	120.863	130.041	124.023	110.202	116.399	138.024	132.643	85.5483	161.587	105.394	98.7088	101.243	117.052	108.588	Ppia	11	6415443	6419817	+	3508	protein_coding	peptidylprolyl isomerase A [Source:MGI Symbol;Acc:MGI:97749]	-
ENSMUSG00000063065	50.7167	177.549	50.989	134.843	144.777	133.564	160.179	135.76	87.7463	194.002	155.288	47.512	137.882	114.102	96.6932	84.9439	107.172	96.954	Mapk3	7	126759601	126765819	+	2257	protein_coding	mitogen-activated protein kinase 3 [Source:MGI Symbol;Acc:MGI:1346859]	-
ENSMUSG00000067818	35.0873	67.3156	11.9174	127.252	116.774	135.716	128.025	126.526	92.2028	72.3056	121.96	303.121	121.761	77.6769	136.909	149.01	116.06	150.058	Myl9	2	156775420	156781658	+	1162	protein_coding	myosin, light polypeptide 9, regulatory [Source:MGI Symbol;Acc:MGI:2138915]	-
ENSMUSG00000071655	176.76	114.852	197.066	85.2613	143.884	121.176	142.146	101.283	71.9461	81.9345	92.7128	79.3502	119.814	138.188	76.3469	95.4573	159.371	87.8329	Ubxn1	19	8871559	8875663	+	1068	protein_coding	UBX domain protein 1 [Source:MGI Symbol;Acc:MGI:1289301]	-
ENSMUSG00000032766	122.883	135.835	47.4142	101.219	198.341	136.607	215.986	172.57	50.3555	142.919	150.692	36.3765	138.787	89.4905	68.7492	41.0672	153.851	79.9916	Gng11	6	4003904	4008445	+	919	protein_coding	guanine nucleotide binding protein (G protein), gamma 11 [Source:MGI Symbol;Acc:MGI:1913316]	-
ENSMUSG00000026547	165.087	136.322	143.978	72.2775	131.694	143.984	141.642	154.169	57.9654	148.58	111.469	59.5921	116.359	136.584	58.5084	94.9795	130.437	73.5528	Tagln2	1	172500047	172507380	+	2082	protein_coding	transgelin 2 [Source:MGI Symbol;Acc:MGI:1312985]	-
ENSMUSG00000036781	175.914	117.713	153.467	86.9767	115.715	117.287	131.725	111.785	99.8039	167.267	129.123	70.9522	83.72	113.456	83.3143	104.988	123.161	85.8937	Rps27l	9	66946086	66949516	+	816	protein_coding	ribosomal protein S27-like [Source:MGI Symbol;Acc:MGI:1915191]	-
ENSMUSG00000018585	92.9952	141.969	131.075	80.4319	115.404	160.671	154.133	114.418	92.4401	132.898	138.656	115.899	149.865	97.0172	64.854	95.5037	110.185	80.8213	Atox1	11	55446641	55461239	-	541	protein_coding	antioxidant 1 copper chaperone [Source:MGI Symbol;Acc:MGI:1333855]	-
ENSMUSG00000060636	139.106	123.818	95.8831	65.5875	119.287	148.865	153.6	140.267	88.7929	118.2	171.569	103.398	76.2993	101.173	106.611	77.9514	142.407	80.0314	Rpl35a	16	33056453	33060189	+	3526	protein_coding	ribosomal protein L35A [Source:MGI Symbol;Acc:MGI:1928894]	-
ENSMUSG00000002985	117.37	68.6262	88.1669	218.288	89.5042	65.7267	108.13	106.269	76.9143	46.8314	84.5834	379.573	105.786	85.2714	104.703	86.3726	91.7082	117.389	Apoe	7	19696109	19699188	-	2138	protein_coding	apolipoprotein E [Source:MGI Symbol;Acc:MGI:88057]	-
ENSMUSG00000078812	228.225	93.5617	238.91	78.9547	111.121	114.759	117.303	101.119	69.7287	107.996	112.589	84.5536	114.319	108.76	84.5578	97.6237	90.4147	81.8592	Eif5a	11	69916714	69921958	-	2377	protein_coding	eukaryotic translation initiation factor 5A [Source:MGI Symbol;Acc:MGI:106248]	-
ENSMUSG00000021025	841.326	49.229	499.542	40.4955	51.3847	47.8927	51.7064	48.5938	30.415	58.8895	45.8752	42.9825	45.1029	21.9393	37.7773	27.2236	50.7178	33.4602	Nfkbia	12	55489410	55492647	-	1610	protein_coding	nuclear factor of kappa light polypeptide gene enhancer in B cells inhibitor, alpha [Source:MGI Symbol;Acc:MGI:104741]	-
ENSMUSG00000021242	185.683	117.901	93.4096	133.906	115.041	91.9638	90.0931	96.6489	120.176	121.649	165.701	46.0765	106.227	97.2976	119.93	115.555	86.8332	114.748	Npc2	12	84754562	84773152	-	5438	protein_coding	NPC intracellular cholesterol transporter 2 [Source:MGI Symbol;Acc:MGI:1915213]	-
ENSMUSG00000067736	241.248	109.119	189.221	20.5083	157.79	216.581	203.061	168.796	10.3361	97.1424	156.228	18.8139	33.2625	53.873	64.1927	45.9343	217.836	12.7516	Gm10222	1	24612407	24612700	-	294	unprocessed_pseudogene	predicted gene 10222 [Source:MGI Symbol;Acc:MGI:3642643]	-
ENSMUSG00000055302	78.2342	124.872	120.539	79.2117	117.935	147.105	140.112	133.043	88.1401	112.141	130.11	74.8936	130.758	137.527	80.3452	108.249	120.396	85.3071	Mrfap1	5	36794867	36796772	-	1648	protein_coding	Morf4 family associated protein 1 [Source:MGI Symbol;Acc:MGI:1914818]	-
ENSMUSG00000030342	207.523	87.9852	112.546	175.337	104.874	79.8706	69.7994	79.7056	120.975	85.3787	112.017	94.9906	94.4991	100.67	158.832	112.407	77.0057	125.359	Cd9	6	125460266	125494791	-	2044	protein_coding	CD9 antigen [Source:MGI Symbol;Acc:MGI:88348]	-
ENSMUSG00000038393	324.607	85.1406	176.031	66.3517	102.867	76.2209	115.407	101.875	102.086	58.3792	78.4886	71.2597	109.064	101.602	84.4526	116.118	110.344	113.637	Txnip	3	96557957	96561883	+	3123	protein_coding	thioredoxin interacting protein [Source:MGI Symbol;Acc:MGI:1889549]	-
ENSMUSG00000024646	80.0502	105.803	83.059	67.7794	96.6465	97.3958	112.596	101.983	153.429	108.398	101.726	81.7097	122.853	124.625	130.278	148.035	112.184	132.004	Cyb5a	18	84851338	84880401	+	2143	protein_coding	cytochrome b5 type A (microsomal) [Source:MGI Symbol;Acc:MGI:1926952]	-
ENSMUSG00000059159	100.403	256.045	107.05	92.4248	104.36	72.1586	69.5825	128.101	86.0078	174.621	146.83	76.9579	93.4514	79.9603	92.4302	60.2888	135.304	73.2727	Gm8129	6	52346730	52346942	-	213	processed_pseudogene	predicted pseudogene 8129 [Source:MGI Symbol;Acc:MGI:3646863]	-
ENSMUSG00000036594	162.557	90.8311	102.18	89.041	107.58	88.2188	103.701	73.8839	87.9813	103.491	113.557	207.991	112.546	75.7125	119.957	62.3799	110.082	135.1	H2-Aa	17	34282744	34287827	-	1874	protein_coding	histocompatibility 2, class II antigen A, alpha [Source:MGI Symbol;Acc:MGI:95895]	-
ENSMUSG00000022587	108.641	79.7683	82.3103	129.142	91.5383	92.8066	110.731	91.2662	86.9607	118.128	67.9802	169.084	204.915	81.4196	108.501	131.507	64.3145	122.507	Ly6e	15	74955051	74959905	+	3784	protein_coding	lymphocyte antigen 6 complex, locus E [Source:MGI Symbol;Acc:MGI:106651]	-
ENSMUSG00000020372	94.6449	133.856	94.5431	73.8997	124.362	119.393	133.346	119.56	79.1906	128.321	126.677	131.676	109.148	97.2633	83.9247	83.5846	127.588	79.8434	Rack1	11	48800332	48806434	+	5119	protein_coding	receptor for activated C kinase 1 [Source:MGI Symbol;Acc:MGI:101849]	-
ENSMUSG00000001175	144.014	92.0899	130.998	65.4968	113.672	104.924	104.46	106.541	82.5797	89.8679	102.849	91.1213	132.935	129.88	89.0934	146.2	114.289	95.9771	Calm1	12	100199435	100209814	+	4706	protein_coding	calmodulin 1 [Source:MGI Symbol;Acc:MGI:88251]	-
ENSMUSG00000020719	132.595	61.5313	85.354	126.57	81.5178	61.9734	75.4815	80.6267	138.135	47.0391	76.1971	139.433	111.186	136.294	153.9	174.248	92.4294	161.354	Ddx5	11	106780355	106789185	-	5775	protein_coding	DEAD (Asp-Glu-Ala-Asp) box polypeptide 5 [Source:MGI Symbol;Acc:MGI:105037]	-
ENSMUSG00000041453	116.024	131.543	101.192	70.3363	153.128	96.1086	130.367	118.897	99.8465	136.499	118.12	124.033	123.78	70.2078	116.642	61.9201	92.1896	64.8877	Rpl21	5	146832890	146837032	+	3400	protein_coding	ribosomal protein L21 [Source:MGI Symbol;Acc:MGI:1278340]	-
ENSMUSG00000005054	215.855	124.086	250.44	81.9201	99.0506	82.2498	76.0337	79.0769	86.3911	119.233	106.792	61.5325	115.133	94.6251	93.1826	77.1857	80.6776	81.0261	Cstb	10	78425669	78427622	+	603	protein_coding	cystatin B [Source:MGI Symbol;Acc:MGI:109514]	-
ENSMUSG00000037499	72.3655	144.84	59.6899	100.546	119.05	99.0442	121.34	100.56	88.9293	112.786	120.693	79.1709	151.237	114.678	111.682	110.827	109.384	103.467	Nenf	1	191306789	191318194	-	742	protein_coding	neuron derived neurotrophic factor [Source:MGI Symbol;Acc:MGI:1913458]	-
ENSMUSG00000038387	105.955	150.582	116.079	100.639	116.821	153.353	138.391	134.541	64.1298	146.345	138.362	43.2197	86.1226	89.5037	70.7476	64.1611	110.416	80.3723	Rras	7	45017961	45021647	+	1121	protein_coding	related RAS viral (r-ras) oncogene [Source:MGI Symbol;Acc:MGI:98179]	-
ENSMUSG00000040026	855.173	0	951.786	1.19865	1.22384	0	0.47837	1.32149	1.5992	52.9486	3.71988	0.480279	1.09117	14.0374	5.33275	1.24927	2.22125	2.47062	Saa3	7	46711998	46715700	-	2606	protein_coding	serum amyloid A 3 [Source:MGI Symbol;Acc:MGI:98223]	-
ENSMUSG00000031246	131.649	118.417	107.978	71.3553	147.754	161.467	147.713	152.91	55.0476	86.4968	123.173	42.1128	99.891	80.7585	78.0205	61.2028	153.484	72.603	Sh3bgrl	X	109095365	109197873	+	3298	protein_coding	SH3-binding domain glutamic acid-rich protein like [Source:MGI Symbol;Acc:MGI:1930849]	-
ENSMUSG00000033940	100.181	118.138	114.147	79.8087	142.366	122.317	119.034	118.301	82.6999	127.681	125.417	71.2729	109.323	80.1299	74.0335	76.1456	140.932	81.4992	Brk1	6	113604772	113616951	+	1095	protein_coding	BRICK1, SCAR/WAVE actin-nucleating complex subunit [Source:MGI Symbol;Acc:MGI:1915406]	-
ENSMUSG00000055839	173.664	125.267	108.62	74.5145	114.897	129.158	126.922	113.694	70.862	138.134	115.405	74.1065	113.311	79.4014	74.3714	77.0644	103.956	66.6334	Elob	17	23824738	23829136	-	1398	protein_coding	elongin B [Source:MGI Symbol;Acc:MGI:1914923]	-
ENSMUSG00000041203	54.2413	123.959	131.688	108.16	110.683	96.224	132.218	105.728	92.5984	113.765	110.927	91.8944	94.038	122.99	97.7205	96.5156	102.133	91.8899	Trir	8	85026823	85030286	+	902	protein_coding	telomerase RNA component interacting RNase [Source:MGI Symbol;Acc:MGI:1922833]	-
ENSMUSG00000029810	66.6421	66.3394	48.9402	126.889	82.4206	75.9912	58.7709	60.445	131.315	73.3234	80.0192	152.115	119.669	158.395	174.265	155.541	85.6049	135.036	Tmem176b	6	48833818	48841496	-	2371	protein_coding	transmembrane protein 176B [Source:MGI Symbol;Acc:MGI:1916348]	-
ENSMUSG00000095098	84.1273	124.568	90.368	108.19	121.403	145.7	148.977	150.651	48.9003	88.3396	106.877	51.5785	70.0392	106.533	61.134	63.4567	151.272	86.986	Ccdc85b	19	5456789	5457397	-	609	protein_coding	coiled-coil domain containing 85B [Source:MGI Symbol;Acc:MGI:2147607]	-
ENSMUSG00000009549	79.9528	129.176	85.6138	78.0845	124.306	135.751	152.192	99.3127	89.7293	99.9053	110.286	64.8356	99.6519	96.2171	92.3533	80.5701	107.495	79.2486	Srp14	2	118475850	118479711	-	1195	protein_coding	signal recognition particle 14 [Source:MGI Symbol;Acc:MGI:107169]	-
ENSMUSG00000021876	47.5567	144.214	29.3892	212.407	100.071	79.4514	116.261	133.02	67.4642	66.2357	154.32	50.8812	154.091	65.9467	114.685	62.3512	93.819	111.171	Rnase4	14	51091077	51106151	+	1637	protein_coding	ribonuclease, RNase A family 4 [Source:MGI Symbol;Acc:MGI:1926217]	-
ENSMUSG00000058600	89.6125	82.358	97.7966	81.5319	106.183	82.7124	126.727	148.594	74.0296	112.878	103.253	136.565	101.508	84.8131	110.057	63.982	128.707	63.6206	Rpl30	15	34440505	34443640	-	3020	protein_coding	ribosomal protein L30 [Source:MGI Symbol;Acc:MGI:98037]	-
ENSMUSG00000001794	98.2631	109.212	111.91	95.0646	118.535	126.446	116.258	119.674	73.7137	144.259	120.949	68.8827	97.9158	85.3732	75.9319	72.848	89.897	68.0092	Capns1	7	30186936	30198811	-	2477	protein_coding	calpain, small subunit 1 [Source:MGI Symbol;Acc:MGI:88266]	-
ENSMUSG00000045954	39.3323	155.756	39.624	97.0169	155.868	146.661	164.132	165.072	57.9483	90.4963	100.748	28.6916	64.6338	80.067	82.1766	67.3537	177.061	76.4038	Cavin2	1	51289126	51302960	+	3055	protein_coding	caveolae associated 2 [Source:MGI Symbol;Acc:MGI:99513]	-
ENSMUSG00000069515	371.053	243.546	96.7894	103.645	102.692	124.658	80.1696	141.438	58.5007	98.0761	243.419	14.2254	21.8007	19.5191	16.3691	9.54692	19.9905	21.9396	Lyz1	10	117287797	117292868	-	1263	protein_coding	lysozyme 1 [Source:MGI Symbol;Acc:MGI:96902]	-
ENSMUSG00000021270	138.903	178.822	60.4643	60.8537	112.529	86.1162	63.0381	77.2732	107.828	77.8484	100.08	82.9468	125.056	177.553	105.687	99.919	75.4756	51.406	Hsp90aa1	12	110690605	110702728	-	3931	protein_coding	heat shock protein 90, alpha (cytosolic), class A member 1 [Source:MGI Symbol;Acc:MGI:96250]	-
ENSMUSG00000002233	481.247	85.025	291.44	63.5746	63.8536	81.4221	81.4993	94.6333	34.3429	117.299	88.0871	29.3451	65.3266	45.1361	38.3858	33.8333	50.3909	36.1659	Rhoc	3	104788375	104794459	+	1618	protein_coding	ras homolog family member C [Source:MGI Symbol;Acc:MGI:106028]	-
ENSMUSG00000028851	100.302	92.1043	71.5441	63.4678	89.6608	93.5375	84.3724	69.1549	102.421	69.3314	87.8696	71.9657	125.133	179.512	121.212	158.274	106.307	94.4532	Nudc	4	133532542	133545996	-	1425	protein_coding	nudC nuclear distribution protein [Source:MGI Symbol;Acc:MGI:106014]	-
ENSMUSG00000019054	128.182	129.753	102.664	74.8053	123.317	105.949	120.089	92.8877	66.8142	118.383	107.998	59.5017	108.849	88.3479	84.4085	77.0318	87.9516	85.8737	Fis1	5	136953275	136966234	+	1714	protein_coding	fission, mitochondrial 1 [Source:MGI Symbol;Acc:MGI:1913687]	-
ENSMUSG00000026032	64.7277	131.455	31.9181	68.2642	96.1398	92.5942	123.628	121.17	94.3333	136.884	149.739	57.3603	118.714	104.747	105.067	95.3717	84.9052	79.2561	Ndufb3	1	58586384	58595964	+	763	protein_coding	NADH:ubiquinone oxidoreductase subunit B3 [Source:MGI Symbol;Acc:MGI:1913745]	-
ENSMUSG00000042043	122.173	111.807	77.2804	67.0903	91.8797	128.521	100.598	101.586	89.0712	106.261	119.389	74.974	92.7026	75.014	111.912	95.8228	100.078	88.3829	Tbca	13	94788910	94842922	+	811	protein_coding	tubulin cofactor A [Source:MGI Symbol;Acc:MGI:107549]	-
ENSMUSG00000067847	94.537	106.987	69.3586	81.0071	104.797	92.8484	100.131	95.6316	90.7748	117.143	145.376	58.5348	116.429	121.629	98.1875	100.885	77.3259	80.8446	Romo1	2	156144039	156145797	+	747	protein_coding	reactive oxygen species modulator 1 [Source:MGI Symbol;Acc:MGI:1914317]	-
ENSMUSG00000023046	37.4951	64.3179	21.1491	121.313	80.7415	94.8939	58.4203	91.4789	90.9612	32.5521	58.5326	82.8548	340.106	137.13	125.244	78.9393	53.9383	174.688	Igfbp6	15	102144362	102149511	+	1112	protein_coding	insulin-like growth factor binding protein 6 [Source:MGI Symbol;Acc:MGI:96441]	-
ENSMUSG00000026473	299.699	68.4596	261.644	43.5469	79.7486	65.0259	47.9778	77.4342	81.9371	59.0629	69.0067	61.5883	91.8136	43.5754	88.2502	115.516	87.1726	101.843	Glul	1	153899944	153909723	+	3323	protein_coding	glutamate-ammonia ligase (glutamine synthetase) [Source:MGI Symbol;Acc:MGI:95739]	-
ENSMUSG00000022018	412.29	52.4198	362.301	48.8249	64.3257	55.0117	65.636	53.8665	48.7079	39.0696	64.868	35.9764	32.3359	58.6906	64.0116	65.3457	106.927	108.799	Rgcc	14	79288756	79301645	-	918	protein_coding	regulator of cell cycle [Source:MGI Symbol;Acc:MGI:1913464]	-
ENSMUSG00000050856	105.9	106.456	57.9457	88.9769	106.06	140.69	109.283	100.2	76.1111	117.795	98.5437	113.193	102.232	71.8648	88.2916	92.7821	88.9718	66.7473	Atp5k	5	108433244	108434448	-	616	protein_coding	ATP synthase, H+ transporting, mitochondrial F1F0 complex, subunit E [Source:MGI Symbol;Acc:MGI:106636]	-
ENSMUSG00000023904	40.1499	110.311	24.0504	73.6675	111.476	112.979	147.768	105.355	93.8015	179.912	134.679	62.2475	100.269	86.0549	88.0235	78.3503	89.221	84.5618	Hcfc1r1	17	23673596	23675227	+	958	protein_coding	host cell factor C1 regulator 1 (XPO1-dependent) [Source:MGI Symbol;Acc:MGI:2663619]	-
ENSMUSG00000081344	86.3744	95.4591	180.117	57.7752	116.428	160.881	45.3615	113.606	62.4517	200.032	93.1337	93.2626	63.272	50.3811	86.7882	48.6541	110.197	56.2392	Gm14303	2	172509521	172509691	-	171	processed_pseudogene	predicted gene 14303 [Source:MGI Symbol;Acc:MGI:3651379]	-
ENSMUSG00000024659	435.075	51.8087	243.291	55.9313	56.9577	45.6609	55.3952	55.0875	66.3158	40.3017	59.5609	78.8757	84.461	83.0161	87.7913	87.8672	61.5332	70.093	Anxa1	19	20373428	20390944	-	2608	protein_coding	annexin A1 [Source:MGI Symbol;Acc:MGI:96819]	-
ENSMUSG00000079477	168.356	102.417	183.186	85.7114	106.533	98.1798	114.474	107.046	60.5433	83.3409	96.0822	51.7443	80.4369	71.9074	67.7569	62.1829	90.6483	69.9613	Rab7	6	87999106	88045270	-	2610	protein_coding	RAB7, member RAS oncogene family [Source:MGI Symbol;Acc:MGI:105068]	-
ENSMUSG00000039450	31.2012	70.9316	25.4621	70.5483	69.1901	55.6598	60.1764	57.3504	174.253	41.5114	85.5448	78.4549	114.583	137.928	163.359	212.012	79.2364	173.008	Dcxr	11	120725399	120727281	-	1144	protein_coding	dicarbonyl L-xylulose reductase [Source:MGI Symbol;Acc:MGI:1915130]	-
ENSMUSG00000040048	74.0827	126.298	77.2977	69.331	98.7113	131.599	108.353	85.7631	78.4047	109.151	130.862	64.8247	97.0526	80.3197	95.3008	86.8416	86.83	89.3343	Ndufb10	17	24722060	24724478	-	1217	protein_coding	NADH:ubiquinone oxidoreductase subunit B10 [Source:MGI Symbol;Acc:MGI:1915592]	-
ENSMUSG00000032966	122.701	124.054	150.641	81.9009	131.752	121.222	127.597	114.287	51.504	128.893	98.6491	33.6541	82.5366	83.6586	52.3228	51.0196	78.648	55.1815	Fkbp1a	2	151542483	151561692	+	3857	protein_coding	FK506 binding protein 1a [Source:MGI Symbol;Acc:MGI:95541]	-
ENSMUSG00000040562	70.3753	88.511	27.943	43.98	78.1116	105.773	89.3456	102.187	94.9417	92.3685	95.3344	67.0663	140.075	127.331	95.6713	169.843	98.7341	98.9251	Gstm2	3	107981702	107986453	-	1679	protein_coding	glutathione S-transferase, mu 2 [Source:MGI Symbol;Acc:MGI:95861]	-
ENSMUSG00000031059	107.088	110.255	62.5824	81.8443	116.125	92.4588	84.3597	103.182	87.2055	93.4464	93.2898	88.1301	92.6527	103.493	86.6824	107.033	91.0143	84.7304	Ndufb11	X	20615326	20617619	-	908	protein_coding	NADH:ubiquinone oxidoreductase subunit B11 [Source:MGI Symbol;Acc:MGI:1349919]	-
ENSMUSG00000024953	135.513	54.6106	264.21	41.2463	51.599	58.269	69.2249	55.6071	73.9153	65.3625	74.2928	74.671	120.554	131.271	96.4127	146.198	77.4434	94.2251	Prdx5	19	6906697	6910106	-	2139	protein_coding	peroxiredoxin 5 [Source:MGI Symbol;Acc:MGI:1859821]	-
ENSMUSG00000004285	107.249	125.867	83.1054	68.1335	100.738	94.408	115.972	99.0185	80.7789	119.965	105.96	69.0126	87.4289	83.1032	77.8358	90.9153	81.3349	82.1508	Atp6v1f	6	29467718	29470512	+	1063	protein_coding	ATPase, H+ transporting, lysosomal V1 subunit F [Source:MGI Symbol;Acc:MGI:1913394]	-
ENSMUSG00000078126	83.1734	111.291	58.1594	63.0201	115.439	125.57	112.765	124.907	87.1941	68.4761	121.323	88.772	126.263	99.9723	75.52	49.983	95.0024	63.04	Rpl23a-ps3	14	34170655	34171122	+	468	processed_pseudogene	ribosomal protein L23A, pseudogene 3 [Source:MGI Symbol;Acc:MGI:3781353]	-
ENSMUSG00000094552	153.854	94.3556	425.291	0	114.768	137.23	233.743	99.3404	43.4115	62.2671	100.979	7.57021	0	82.8382	0	0	92.3707	20.3748	Ighd3-2	12	113448214	113448229	-	16	IG_D_gene	immunoglobulin heavy diversity 3-2 [Source:MGI Symbol;Acc:MGI:4439707]	-
ENSMUSG00000022982	104.559	79.715	119.981	51.0245	87.98	76.2584	92.0756	78.6938	89.01	95.9886	85.0275	76.2233	100.662	113.578	76.4717	133.425	106.471	95.0379	Sod1	16	90220754	90226329	+	3970	protein_coding	superoxide dismutase 1, soluble [Source:MGI Symbol;Acc:MGI:98351]	-
ENSMUSG00000064373	91.3274	123.008	64.3946	89.8079	144.12	131.794	172.924	153.116	33.4522	60.6458	101.03	37.178	79.6543	69.0454	62.6785	49.7245	130.831	67.0461	Selenop	15	3268547	3280508	+	2842	protein_coding	selenoprotein P [Source:MGI Symbol;Acc:MGI:894288]	-
ENSMUSG00000034566	91.8926	122.888	74.317	74.181	101.462	92.1297	107.597	114.281	77.3407	108.695	124.621	84.2489	89.3815	70.1608	76.4451	87.6142	92.4758	68.1756	Atp5h	11	115415689	115419962	-	1465	protein_coding	ATP synthase, H+ transporting, mitochondrial F0 complex, subunit D [Source:MGI Symbol;Acc:MGI:1918929]	-
ENSMUSG00000046229	36.8926	112.754	49.7023	104.276	84.8044	50.54	89.7881	77.4829	58.1108	153.138	111.908	70.5356	153.241	133.938	94.0356	103.103	92.8169	80.318	Scand1	2	156311847	156312704	-	759	protein_coding	SCAN domain-containing 1 [Source:MGI Symbol;Acc:MGI:1343132]	-
ENSMUSG00000052681	316.885	88.4011	260.905	56.838	86.7942	79.5369	81.3605	86.0674	39.829	67.8807	78.6705	44.2243	74.6946	60.3421	48.2614	39.3006	86.1785	54.0879	Rap1b	10	117813871	117846035	-	2884	protein_coding	RAS related protein 1b [Source:MGI Symbol;Acc:MGI:894315]	-
ENSMUSG00000036256	97.8611	80.1515	73.3658	314.489	113.274	83.6481	81.5735	126.793	71.4549	57.2713	72.832	110.103	57.3663	36.7256	74.0063	50.6147	66.8268	79.4431	Igfbp7	5	77349240	77408041	-	1209	protein_coding	insulin-like growth factor binding protein 7 [Source:MGI Symbol;Acc:MGI:1352480]	-
ENSMUSG00000022312	87.0442	98.3358	92.275	59.4625	115.832	109.287	127.258	109.447	48.0435	99.6068	114.904	79.3964	66.7314	89.0459	70.4319	64.889	145.547	64.992	Eif3h	15	51786558	51865523	-	1612	protein_coding	eukaryotic translation initiation factor 3, subunit H [Source:MGI Symbol;Acc:MGI:1915385]	-
ENSMUSG00000023020	37.24	108.059	64.726	68.0219	77.5311	83.6043	128.169	97.829	103.875	62.6978	117.001	67.0115	122.98	111.917	103.108	102.232	93.3502	82.6264	Cox14	15	99725618	99728136	+	723	protein_coding	cytochrome c oxidase assembly protein 14 [Source:MGI Symbol;Acc:MGI:1913629]	-
ENSMUSG00000035674	56.1523	118.452	46.14	83.8389	116.033	101.228	95.5507	85.0193	79.7719	151.748	120.599	88.3339	96.2975	74.1815	84.5258	80.6997	77.9698	72.5677	Ndufa3	7	3617373	3620327	+	1022	protein_coding	NADH:ubiquinone oxidoreductase subunit A3 [Source:MGI Symbol;Acc:MGI:1913341]	-
ENSMUSG00000023048	130.904	111.692	125.112	71.2486	89.2217	90.5428	99.7624	82.2537	66.9238	117.253	91.5407	53.8412	109.628	107.34	70.5171	60.559	75.0635	71.4553	Prr13	15	102459028	102462806	+	1562	protein_coding	proline rich 13 [Source:MGI Symbol;Acc:MGI:1913401]	-
ENSMUSG00000025784	31.4843	94.5458	20.3379	112.517	137.955	216.522	193.809	182.836	71.2439	79.5078	99.2341	35.8567	59.9872	47.966	64.8575	62.1121	61.208	51.2656	Clec3b	9	123150946	123157432	+	992	protein_coding	C-type lectin domain family 3, member b [Source:MGI Symbol;Acc:MGI:104540]	-
ENSMUSG00000031207	148.723	120.543	159.569	99.4705	109.019	106.764	120.19	106.055	42.0736	74.3755	100.849	38.3069	57.0786	54.7908	63.4268	40.7452	120.961	54.9962	Msn	X	96096042	96168552	+	6327	protein_coding	moesin [Source:MGI Symbol;Acc:MGI:97167]	-
ENSMUSG00000067719	143.896	116.341	58.7241	51.7205	101.964	102.407	104.895	114.879	75.3028	126.281	101.96	77.3517	74.5183	43.9659	77.4562	77.4584	90.0789	73.8504	Gm10221	5	24581554	24581862	-	309	processed_pseudogene	predicted gene 10221 [Source:MGI Symbol;Acc:MGI:3708709]	-
ENSMUSG00000037815	107.923	115.048	129.097	97.9356	109.766	101.601	106.602	100.815	63.8377	71.5281	86.9437	42.9511	79.0147	78.367	81.3309	74.4236	90.1892	75.1961	Ctnna1	18	35118888	35254773	+	3698	protein_coding	catenin (cadherin associated protein), alpha 1 [Source:MGI Symbol;Acc:MGI:88274]	-
ENSMUSG00000075010	200.211	111.756	103.411	61.9831	94.1362	100.81	75.7333	70.1833	42.8477	180.494	81.233	77.1834	106.015	95.705	48.63	45.1775	76.7757	39.797	AW112010	19	11047617	11050566	-	770	lincRNA	expressed sequence AW112010 [Source:MGI Symbol;Acc:MGI:2147706]	-
ENSMUSG00000036309	71.1864	93.374	53.6156	74.2866	99.1381	88.734	106.815	97.3285	92.4385	79.005	104.444	64.1134	107.312	98.072	92.3419	105.308	93.1923	86.6781	Skp1a	11	52231995	52246858	+	2211	protein_coding	S-phase kinase-associated protein 1A [Source:MGI Symbol;Acc:MGI:103575]	-
ENSMUSG00000032249	36.5927	136.258	54.2978	67.8483	148.511	117.49	136.983	108.44	52.6807	94.0366	106.073	38.6401	70.4731	91.8494	85.5681	57.261	134.287	60.5323	Anp32a	9	62341293	62378812	+	3166	protein_coding	acidic (leucine-rich) nuclear phosphoprotein 32 family, member A [Source:MGI Symbol;Acc:MGI:108447]	-
ENSMUSG00000017707	119.277	107.919	96.5298	130.068	99.6667	62.0227	80.8363	112.195	68.5992	44.668	87.5754	90.9161	66.1409	65.9427	95.7149	84.42	80.8244	102.001	Serinc3	2	163623272	163645131	-	3840	protein_coding	serine incorporator 3 [Source:MGI Symbol;Acc:MGI:1349457]	-
ENSMUSG00000031447	90.9898	76.1899	53.1966	123.101	68.7545	53.2565	96.1576	79.1917	89.2898	67.3494	77.8281	86.7862	104.799	108.064	106.87	131.869	66.2076	115.211	Lamp1	8	13159161	13175338	+	2675	protein_coding	lysosomal-associated membrane protein 1 [Source:MGI Symbol;Acc:MGI:96745]	-
ENSMUSG00000026728	36.3632	125.25	38.4593	86.3899	141.17	153.121	114.743	144.192	37.8009	74.1482	122.729	59.5955	107.112	63.8394	62.6521	43.1542	115.085	65.3299	Vim	2	13573927	13582826	+	4743	protein_coding	vimentin [Source:MGI Symbol;Acc:MGI:98932]	-
ENSMUSG00000025428	96.7295	77.2903	124.635	59.3895	79.5368	105.675	80.8112	84.6409	71.6186	78.0706	92.7656	99.0108	101.545	98.8034	62.3206	111.751	85.6823	79.9784	Atp5a1	18	77773729	77782869	+	3135	protein_coding	ATP synthase, H+ transporting, mitochondrial F1 complex, alpha subunit 1 [Source:MGI Symbol;Acc:MGI:88115]	-
ENSMUSG00000004207	49.5653	63.8894	32.1508	125.247	78.5781	65.4732	58.4548	67.7716	93.3095	79.2711	101.063	149.359	120.134	98.4639	112.905	114.426	62.3435	115.091	Psap	10	60277627	60302597	+	2744	protein_coding	prosaposin [Source:MGI Symbol;Acc:MGI:97783]	-
ENSMUSG00000029309	77.7392	80.509	44.5896	147.452	95.1657	74.1437	80.6941	108.807	96.0759	75.5319	99.2159	99.6645	96.2764	60.7198	87.3913	83.1973	79.1719	92.9179	Sparcl1	5	104079111	104113733	-	2937	protein_coding	SPARC-like 1 [Source:MGI Symbol;Acc:MGI:108110]	-
ENSMUSG00000008475	161.831	97.0088	178.021	59.5737	100.723	69.516	94.2703	92.8031	55.6949	111.111	104.199	50.9115	67.497	70.7837	61.0972	47.1768	92.966	60.265	Arpc5	1	152766542	152775597	+	2276	protein_coding	actin related protein 2/3 complex, subunit 5 [Source:MGI Symbol;Acc:MGI:1915021]	-
ENSMUSG00000024033	7.53411	31.0465	0	27.179	54.7996	15.6454	18.6828	34.2135	109.2	29.6714	74.557	82.8647	193.112	233.256	185.388	282.694	67.0825	127.115	Rsph1	17	31255019	31277356	-	1164	protein_coding	radial spoke head 1 homolog (Chlamydomonas) [Source:MGI Symbol;Acc:MGI:1194909]	-
ENSMUSG00000018042	75.4953	116.594	81.716	71.3846	136.223	142.711	109.606	86.6179	42.0581	103.846	92.0983	34.2121	60.8518	88.5355	54.0696	69.0418	144.309	62.5465	Cyb5r3	15	83153494	83172592	-	4298	protein_coding	cytochrome b5 reductase 3 [Source:MGI Symbol;Acc:MGI:94893]	-
ENSMUSG00000020440	76.0801	130.97	66.6073	82.2052	88.335	58.6527	104.812	84.7371	76.6246	152.898	131.684	53.3739	87.9405	80.8661	77.9576	65.6316	70.5253	77.311	Arf5	6	28423560	28426602	+	1907	protein_coding	ADP-ribosylation factor 5 [Source:MGI Symbol;Acc:MGI:99434]	-
ENSMUSG00000045799	43.5005	104.746	34.8191	44.3214	101.536	123.776	160.364	142.44	54.2644	101.802	75.9061	43.4987	85.6628	97.2363	73.6575	87.024	115.463	74.3437	Gm9800	14	8800000	8800335	-	336	processed_pseudogene	predicted gene 9800 [Source:MGI Symbol;Acc:MGI:3710580]	-
ENSMUSG00000079018	201.653	104.314	152.41	111.11	99.6433	82.5624	75.163	140.747	41.7807	92.2806	86.9149	59.9718	62.9869	48.3692	40.5138	49.7194	58.4592	52.972	Ly6c1	15	75044018	75048830	-	1677	protein_coding	lymphocyte antigen 6 complex, locus C1 [Source:MGI Symbol;Acc:MGI:96882]	-
ENSMUSG00000026385	116.96	114.063	83.6163	88.0717	91.8889	105.27	90.3949	77.8081	83.3428	113.967	122.709	70.8114	74.9161	71.1173	69.195	64.0198	61.9269	60.4366	Dbi	1	120113280	120121078	-	1422	protein_coding	diazepam binding inhibitor [Source:MGI Symbol;Acc:MGI:94865]	-
ENSMUSG00000044258	363.616	56.7118	265.037	68.7842	91.695	55.3271	82.3991	74.1021	35.8742	51.6727	41.607	19.1913	68.9282	45.0816	53.1272	24.1384	84.0743	78.6189	Ctla2a	13	60934155	60936625	-	2108	protein_coding	cytotoxic T lymphocyte-associated protein 2 alpha [Source:MGI Symbol;Acc:MGI:88554]	-
ENSMUSG00000013822	25.6725	49.1181	33.3871	36.7487	48.3232	42.572	37.9247	44.1513	106.871	52.2917	73.9079	86.0151	165.77	195.385	123.461	233.256	73.8097	128.067	Elof1	9	22112989	22117172	-	1702	protein_coding	ELF1 homolog, elongation factor 1 [Source:MGI Symbol;Acc:MGI:1913376]	-
ENSMUSG00000021520	88.519	101.034	88.7172	60.6194	90.1372	97.753	75.4241	106.951	86.1292	89.4675	120.674	69.2726	95.0081	76.8617	96.2631	75.0857	73.531	65.1714	Uqcrb	13	66900617	66905378	-	876	protein_coding	ubiquinol-cytochrome c reductase binding protein [Source:MGI Symbol;Acc:MGI:1914780]	-
ENSMUSG00000069763	65.9127	143.269	47.5628	161.033	148.224	103.867	163.364	167.61	28.204	69.0682	87.7129	5.66659	48.082	64.0578	66.9481	32.0039	95.211	55.8548	Tmem100	11	90030348	90036508	+	1767	protein_coding	transmembrane protein 100 [Source:MGI Symbol;Acc:MGI:1915138]	-
ENSMUSG00000010376	74.426	96.0766	91.2626	68.0928	103.161	104.064	97.4326	84.3811	68.8525	114.296	101.219	52.5092	124.247	81.9842	73.9478	65.3089	87.2187	65.0184	Nedd8	14	55662263	55672124	-	1261	protein_coding	neural precursor cell expressed, developmentally down-regulated gene 8 [Source:MGI Symbol;Acc:MGI:97301]	-
ENSMUSG00000070306	7.85897	33.8308	4.16305	32.3971	33.7503	25.3114	19.9336	29.6221	146.439	20.9596	52.4876	88.1852	142.663	211.962	162.637	322.764	59.2213	158.195	Ccdc153	9	44240676	44247306	+	2036	protein_coding	coiled-coil domain containing 153 [Source:MGI Symbol;Acc:MGI:2448587]	-
ENSMUSG00000006373	29.0807	70.2205	9.64296	80.4285	51.1597	43.0526	44.3068	51.9735	144.425	48.6424	76.9365	98.4249	99.0852	126.296	181.617	172.555	65.792	155.735	Pgrmc1	X	36598206	36606079	+	1857	protein_coding	progesterone receptor membrane component 1 [Source:MGI Symbol;Acc:MGI:1858305]	-
ENSMUSG00000018593	171.198	94.9534	125.809	179.663	125.273	118.145	85.8952	92.8715	42.3343	83.9872	106.874	70.4208	40.3905	32.8729	36.959	30.4786	57.4513	50.0226	Sparc	11	55394500	55423183	-	3788	protein_coding	secreted acidic cysteine rich glycoprotein [Source:MGI Symbol;Acc:MGI:98373]	-
ENSMUSG00000042406	234.696	75.8686	212.585	64.7725	74.0629	61.402	88.5248	94.7436	74.0831	71.9672	74.9788	57.5139	60.4143	64.3594	53.5701	55.5076	59.4912	61.2972	Atf4	15	80255184	80257541	+	2358	protein_coding	activating transcription factor 4 [Source:MGI Symbol;Acc:MGI:88096]	TF_bZIP
ENSMUSG00000016252	84.3746	78.0207	85.3199	47.6777	100.499	91.9404	97.4177	90.5654	67.54	133.517	120.794	101.258	96.3715	77.0263	45.9213	81.4036	79.3252	60.6138	Atp5e	2	174461072	174464105	-	1756	protein_coding	ATP synthase, H+ transporting, mitochondrial F1 complex, epsilon subunit [Source:MGI Symbol;Acc:MGI:1855697]	-
ENSMUSG00000024194	32.2407	96.2456	42.1232	86.1316	137.449	76.6191	102.659	77.6899	87.7595	78.2897	65.4375	74.279	118.194	106.298	101.25	107.294	58.8288	88.5314	Cuta	17	26937973	26939478	-	649	protein_coding	cutA divalent cation tolerance homolog [Source:MGI Symbol;Acc:MGI:1914925]	-
ENSMUSG00000025132	88.8513	91.7647	139.417	74.3167	83.6775	118.233	89.9916	90.0624	39.451	121.115	72.4219	62.6179	96.8464	83.029	48.2682	60.9563	116.07	56.2517	Arhgdia	11	120578104	120581624	-	2258	protein_coding	Rho GDP dissociation inhibitor (GDI) alpha [Source:MGI Symbol;Acc:MGI:2178103]	-
ENSMUSG00000032330	111.153	114.146	52.2287	71.6049	91.0156	94.132	62.3609	101.585	72.1992	102.02	119.806	93.1948	62.1558	85.5761	77.4245	66.356	93.023	61.3402	Cox7a2	9	79755361	79759878	-	944	protein_coding	cytochrome c oxidase subunit 7A2 [Source:MGI Symbol;Acc:MGI:1316715]	-
ENSMUSG00000054619	31.4231	75.339	23.0939	102.205	67.4477	83.7162	63.7861	92.0116	74.979	51.1254	69.5986	85.821	59.6006	111.549	113.553	172.805	134.267	118.92	Mettl7a1	15	100304140	100328662	+	2595	protein_coding	methyltransferase like 7A1 [Source:MGI Symbol;Acc:MGI:1916523]	-
ENSMUSG00000024914	106.134	96.5776	113.414	67.8037	89.7075	79.8983	127.137	74.5576	50.4182	89.7467	69.5345	46.1025	92.5807	86.1784	59.1526	76.1488	121.109	65.3491	Drap1	19	5422805	5424979	-	1741	protein_coding	Dr1 associated protein 1 (negative cofactor 2 alpha) [Source:MGI Symbol;Acc:MGI:1913806]	-
ENSMUSG00000062683	62.4603	88.3281	67.2803	49.658	99.243	69.938	96.9189	80.8166	79.0997	135.91	86.9497	62.719	98.0506	88.2684	79.6903	85.1602	99.117	75.3928	Atp5g2	15	102662864	102672352	-	1675	protein_coding	ATP synthase, H+ transporting, mitochondrial F0 complex, subunit C2 (subunit 9) [Source:MGI Symbol;Acc:MGI:1915192]	-
ENSMUSG00000046718	60.9965	84.0109	20.4916	145.811	80.3782	73.2324	100.933	58.9662	49.2286	116.214	60.8335	58.0355	288.484	61.1333	72.4374	42.1955	57.6933	71.842	Bst2	8	71534255	71537456	-	903	protein_coding	bone marrow stromal cell antigen 2 [Source:MGI Symbol;Acc:MGI:1916800]	-
ENSMUSG00000042436	131.761	81.1497	80.2491	224.395	89.7575	113.366	95.2018	89.3133	54.1628	94.6858	77.3368	18.5277	53.3701	41.3415	71.4353	52.29	58.3124	66.7852	Mfap4	11	61485431	61488900	+	1922	protein_coding	microfibrillar-associated protein 4 [Source:MGI Symbol;Acc:MGI:1342276]	-
ENSMUSG00000049154	0	37.1099	0	29.6597	36.8177	25.2849	10.7489	24.9178	126.636	26.0636	55.5653	77.6158	135.531	188.877	205.46	298.892	74.9392	134.61	Fam183b	11	58792797	58801960	-	567	protein_coding	family with sequence similarity 183, member B [Source:MGI Symbol;Acc:MGI:1922679]	-
ENSMUSG00000027293	51.0288	126.051	58.6919	95.5864	123.974	102.05	158.91	128.586	49.056	84.784	105.008	21.6734	64.3364	62.4667	58.114	50.9453	88.4288	59.0345	Ehd4	2	120089175	120154606	-	4007	protein_coding	EH-domain containing 4 [Source:MGI Symbol;Acc:MGI:1919619]	-
ENSMUSG00000012405	84.9839	82.1462	87.085	44.679	107.824	110.878	117.959	93.123	52.5924	110.115	101.452	82.9529	65.1771	77.7667	57.1841	63.7994	88.399	57.9524	Rpl15	14	18267823	18271391	-	2473	protein_coding	ribosomal protein L15 [Source:MGI Symbol;Acc:MGI:1913730]	-
ENSMUSG00000038370	2.92684	46.0709	3.25513	28.8364	44.2478	39.1487	41.7213	38.0759	79.2253	25.2701	58.1049	95.9821	193.686	202.3	134.525	239.97	96.6856	114.342	Pcp4l1	1	171173262	171196268	-	1577	protein_coding	Purkinje cell protein 4-like 1 [Source:MGI Symbol;Acc:MGI:1913675]	-
ENSMUSG00000041120	61.9807	87.3473	64.5344	88.7055	94.8876	144.342	113.305	123.007	55.9887	90.4961	103.938	42.9562	104.494	79.3421	54.412	49.0495	74.151	51.3729	Nbl1	4	139082284	139092993	-	2033	protein_coding	neuroblastoma, suppression of tumorigenicity 1 [Source:MGI Symbol;Acc:MGI:104591]	-
ENSMUSG00000042784	78.9602	102.56	30.5828	101.875	65.8317	94.0331	50.3636	56.3842	90.4869	141.061	121.898	57.4123	67.0204	79.9427	96.0417	117.776	44.0985	86.6406	Muc1	3	89229057	89233381	+	2346	protein_coding	mucin 1, transmembrane [Source:MGI Symbol;Acc:MGI:97231]	-
ENSMUSG00000006304	174.742	73.6094	190.491	41.0386	87.6617	87.99	102.404	83.2642	36.7279	85.1872	71.979	54.0577	66.1491	67.9656	43.8418	52.6378	107.834	52.4353	Arpc2	1	74236084	74268209	+	2033	protein_coding	actin related protein 2/3 complex, subunit 2 [Source:MGI Symbol;Acc:MGI:1923959]	-
ENSMUSG00000033916	123.401	79.4958	107.36	66.4547	84.2538	68.4692	84.873	85.2629	72.7759	64.875	80.4457	66.3642	99.4976	91.2503	72.2748	86.2306	74.8293	71.189	Chmp2a	7	13032010	13034807	-	1162	protein_coding	charged multivesicular body protein 2A [Source:MGI Symbol;Acc:MGI:1916203]	-
ENSMUSG00000027602	66.8309	83.1703	55.3939	76.4267	94.8461	90.662	76.5877	90.0223	58.8132	112.9	91.6593	66.7324	101.773	87.9305	58.4732	118.331	78.3183	68.7671	Map1lc3a	2	155276297	155278073	+	1181	protein_coding	microtubule-associated protein 1 light chain 3 alpha [Source:MGI Symbol;Acc:MGI:1915661]	-
ENSMUSG00000028713	25.9152	64.5767	12.8058	114.15	72.0136	54.7318	68.8889	69.8671	132.005	44.6027	62.5621	98.4843	40.2424	117.09	123.335	171.005	79.4869	125.428	Cyp4b1	4	115624725	115647723	-	2256	protein_coding	cytochrome P450, family 4, subfamily b, polypeptide 1 [Source:MGI Symbol;Acc:MGI:103225]	-
ENSMUSG00000058427	1052.36	0	417.021	0.0702551	0	0	0	0	0.251904	0.0802929	0.78127	0	0	0.256366	0.41482	0.0583064	0.238222	0	Cxcl2	5	90903871	90905938	+	2068	protein_coding	chemokine (C-X-C motif) ligand 2 [Source:MGI Symbol;Acc:MGI:1340094]	-
ENSMUSG00000027187	17.1931	90.7446	12.0157	81.5818	75.4161	68.904	80.4689	82.6928	114.933	44.4187	90.6279	47.8838	88.8913	113.976	122.341	146.096	90.5914	97.7959	Cat	2	103453849	103485160	-	2613	protein_coding	catalase [Source:MGI Symbol;Acc:MGI:88271]	-
ENSMUSG00000029632	77.2057	84.3119	72.5269	62.9124	104.974	81.7407	73.6204	85.8089	85.9429	88.2531	77.2986	78.8778	76.8891	92.2797	78.3618	87.9666	79.7291	74.742	Ndufa4	6	11900292	11907497	-	1381	protein_coding	Ndufa4, mitochondrial complex associated [Source:MGI Symbol;Acc:MGI:107686]	-
ENSMUSG00000021134	210.99	31.7989	88.4872	95.049	37.0543	30.573	37.5809	38.6601	101.41	27.1469	53.0434	78.309	94.2948	97.1459	123.246	106.594	72.6674	136.605	Srsf5	12	80945504	80950507	+	3988	protein_coding	serine/arginine-rich splicing factor 5 [Source:MGI Symbol;Acc:MGI:98287]	-
ENSMUSG00000011179	505.935	29.7615	320.415	17.8996	28.0999	25.4523	35.3914	29.4083	30.8534	21.603	27.1142	30.1652	76.4035	65.7645	43.4971	62.6437	50.458	53.5788	Odc1	12	17544794	17551505	+	3405	protein_coding	ornithine decarboxylase, structural 1 [Source:MGI Symbol;Acc:MGI:97402]	-
ENSMUSG00000054452	54.4074	88.5822	68.7132	66.3795	92.7331	97.6238	106.815	73.4707	43.8021	117.487	78.298	66.7983	99.1452	89.7853	51.2419	73.7787	121.757	61.0144	Aes	10	81559488	81566362	+	3334	protein_coding	amino-terminal enhancer of split [Source:MGI Symbol;Acc:MGI:95806]	-
ENSMUSG00000023010	64.3581	74.9403	34.8648	102.476	56.4299	61.7294	46.4136	55.7436	104.821	81.2456	89.5912	79.1879	82.0817	107.397	118.287	127.096	52.7564	109.084	Tmbim6	15	99392882	99410049	+	4578	protein_coding	transmembrane BAX inhibitor motif containing 6 [Source:MGI Symbol;Acc:MGI:99682]	-
ENSMUSG00000073421	94.0796	71.9339	72.5614	88.5971	75.5697	44.8936	61.9381	59.2819	64.335	55.5852	96.9344	183.276	71.8132	81.2492	109.891	57.1584	54.1698	100.144	H2-Ab1	17	34263209	34269418	+	1637	protein_coding	histocompatibility 2, class II antigen A, beta 1 [Source:MGI Symbol;Acc:MGI:103070]	-
ENSMUSG00000057113	120.774	78.1044	106.703	50.7553	87.145	82.3412	82.4851	83.4981	55.2214	69.2221	86.7809	80.658	86.2459	69.6773	66.4551	55.5155	122.006	59.1442	Npm1	11	33152287	33163206	-	2665	protein_coding	nucleophosmin 1 [Source:MGI Symbol;Acc:MGI:106184]	-
ENSMUSG00000024844	54.5995	89.7528	58.0885	66.8855	80.028	100.649	103.886	88.1949	67.0232	122.307	84.724	64.9438	82.4658	76.696	79.5602	82.0516	74.3472	61.671	Banf1	19	5364641	5366645	-	820	protein_coding	barrier to autointegration factor 1 [Source:MGI Symbol;Acc:MGI:1346330]	-
ENSMUSG00000047676	89.1834	71.6463	100.36	41.6984	89.439	115.148	78.4134	68.2474	57.3915	107.695	84.4998	107.574	88.8696	81.9958	60.7764	53.9534	75.0099	60.9172	Rpsa-ps10	3	150072658	150073542	-	885	processed_pseudogene	ribosomal protein SA, pseudogene 10 [Source:MGI Symbol;Acc:MGI:3704228]	-
ENSMUSG00000006360	32.3904	85.996	44.5056	74.1254	94.6542	79.7606	61.7848	74.7861	88.9175	89.1403	102.751	76.251	94.4822	94.9006	100.515	65.6566	64.4434	103.143	Crip1	12	113146316	113153879	+	2280	protein_coding	cysteine-rich protein 1 (intestinal) [Source:MGI Symbol;Acc:MGI:88501]	-
ENSMUSG00000022193	83.3449	77.0378	85.7835	65.6138	77.0807	77.4372	88.4398	78.9714	80.3524	68.7086	84.0825	56.0482	95.7404	77.9914	89.4109	100.124	70.8278	68.9887	Psmb5	14	54614119	54618022	-	899	protein_coding	proteasome (prosome, macropain) subunit, beta type 5 [Source:MGI Symbol;Acc:MGI:1194513]	-
ENSMUSG00000110841	77.3138	73.9672	80.8364	63.3352	71.635	78.3709	47.3316	71.5517	78.2062	105.552	121.204	47.8813	84.4295	94.9933	81.6896	73.1646	79.0644	90.6627	Gpx4-ps2	10	45875291	45876086	+	796	transcribed_processed_pseudogene	glutathione peroxidase 4, pseudogene 2 [Source:MGI Symbol;Acc:MGI:3779731]	-
ENSMUSG00000028333	111.535	77.8598	132.528	57.9965	102.166	107.33	102.837	75.0263	40.224	47.1237	70.0768	58.35	74.3272	63.0652	70.4876	64.1886	108.376	55.7338	Anp32b	4	46450902	46472657	+	1716	protein_coding	acidic (leucine-rich) nuclear phosphoprotein 32 family, member B [Source:MGI Symbol;Acc:MGI:1914878]	-
ENSMUSG00000063015	76.5313	93.8985	88.8391	63.7915	101.855	101.668	100.604	97.5793	58.1975	90.84	108.766	48.4664	74.9413	49.8183	63.6049	52.2211	92.2495	54.1477	Ccni	5	93181933	93206495	-	3303	protein_coding	cyclin I [Source:MGI Symbol;Acc:MGI:1341077]	-
ENSMUSG00000076617	6.11828	10.4061	6.39309	20.2602	26.2883	17.3945	13.073	14.7015	8.88486	35.6567	11.8709	203.885	16.9161	106.398	126.085	132.501	517.198	143.596	Ighm	12	113418558	113422730	-	1886	IG_C_gene	immunoglobulin heavy constant mu [Source:MGI Symbol;Acc:MGI:96448]	-
ENSMUSG00000030934	63.8887	98.0338	40.5689	72.9824	86.2857	89.9727	96.2559	100.575	85.7929	56.8495	100.686	51.8196	81.9046	84.495	86.5482	75.9741	65.8598	75.0932	Oat	7	132557478	132576398	-	2360	protein_coding	ornithine aminotransferase [Source:MGI Symbol;Acc:MGI:97394]	-
ENSMUSG00000033022	62.7485	116.804	94.0994	76.5134	73.7166	81.4623	107.553	132.05	34.3887	95.829	106.504	25.3066	68.132	62.3723	64.7031	38.6164	111.891	59.0469	Cdo1	18	46713205	46728342	-	1530	protein_coding	cysteine dioxygenase 1, cytosolic [Source:MGI Symbol;Acc:MGI:105925]	-
ENSMUSG00000023043	88.1156	56.0092	65.9621	65.4654	51.6524	33.7051	45.9788	41.171	100.055	32.2385	55.4939	112.751	143.586	93.572	119.156	121.039	67.4514	113.798	Krt18	15	102028180	102032027	+	1437	protein_coding	keratin 18 [Source:MGI Symbol;Acc:MGI:96692]	-
ENSMUSG00000031839	65.8904	88.4742	49.33	62.0263	98.1006	115	90.8793	101.019	71.4739	103.589	80.5539	46.3406	70.064	76.277	63.797	75.7093	86.5634	59.9091	Hsbp1	8	119344488	119348922	+	1861	protein_coding	heat shock factor binding protein 1 [Source:MGI Symbol;Acc:MGI:1915446]	-
ENSMUSG00000028419	35.9568	98.6416	64.6805	58.3924	101.546	122.526	112.161	89.4071	51.9566	82.9682	88.4339	36.6001	77.6658	85.2923	62.122	62.4717	110.756	60.3062	Chmp5	4	40948407	40965303	+	1519	protein_coding	charged multivesicular body protein 5 [Source:MGI Symbol;Acc:MGI:1924209]	-
ENSMUSG00000038467	246.759	50.6457	208.075	49.0982	76.8595	61.9983	69.7015	55.1074	41.8053	52.3449	59.3819	38.3229	70.7587	78.8904	49.3887	59.6047	77.53	51.324	Chmp4b	2	154651705	154694785	+	2027	protein_coding	charged multivesicular body protein 4B [Source:MGI Symbol;Acc:MGI:1922858]	-
ENSMUSG00000062456	105.761	81.1103	68.9328	40.895	79.583	99.0646	99.8267	97.12	43.6	105.971	109.726	52.9951	79.5937	72.2167	49.7205	52.9599	104.09	46.7647	Rpl9-ps6	19	32465885	32466575	-	691	protein_coding	ribosomal protein L9, pseudogene 6 [Source:MGI Symbol;Acc:MGI:3642682]	-
ENSMUSG00000114003	81.9506	123.109	67.4091	32.8339	115.085	99.0596	101.979	95.7648	32.239	75.9005	73.1439	73.77	92.1785	65.8463	38.389	61.2923	110.545	49.2543	Gm9616	13	3298887	3299667	+	781	processed_pseudogene	predicted gene 9616 [Source:MGI Symbol;Acc:MGI:3780024]	-
ENSMUSG00000042682	112.604	87.6194	105.365	61.5033	96.391	79.5711	90.3898	87.8356	62.6724	76.3055	86.9655	39.2429	89.1614	67.1467	55.9121	56.5267	80.8264	53.5498	Selenok	14	29968308	29975662	+	1891	protein_coding	selenoprotein K [Source:MGI Symbol;Acc:MGI:1931466]	-
ENSMUSG00000024479	141.807	86.7751	86.5605	77.8028	82.6901	76.3564	103.487	67.5589	84.2036	59.101	81.0181	23.0066	53.4393	75.3013	72.1029	67.8504	92.0158	57.45	Mal2	15	54571192	54602847	+	2950	protein_coding	mal, T cell differentiation protein 2 [Source:MGI Symbol;Acc:MGI:2146021]	-
ENSMUSG00000033307	90.2475	78.6507	84.1267	51.8745	73.6848	62.7586	97.9828	69.4568	68.293	118.795	74.5097	81.3992	75.7794	78.1904	69.6642	75.3408	68.4411	65.1446	Mif	10	75859353	75860240	-	745	protein_coding	macrophage migration inhibitory factor (glycosylation-inhibiting factor) [Source:MGI Symbol;Acc:MGI:96982]	-
ENSMUSG00000023089	103.911	106.79	67.556	61.6628	104.232	86.6059	82.1424	73.5855	63.4347	79.1613	131.06	68.4644	52.3529	53.0421	72.5264	47.2029	72.5599	52.2795	Ndufa5	6	24518666	24528013	-	1032	protein_coding	NADH:ubiquinone oxidoreductase subunit A5 [Source:MGI Symbol;Acc:MGI:1915452]	-
ENSMUSG00000047187	112.812	78.7845	95.8733	65.4237	80.5614	80.8978	95.7848	101.219	53.201	78.8581	91.9235	43.6112	78.883	72.1426	62.1769	51.8942	73.0997	54.5047	Rab2a	4	8535644	8607778	+	2133	protein_coding	RAB2A, member RAS oncogene family [Source:MGI Symbol;Acc:MGI:1928750]	-
ENSMUSG00000049382	82.349	52.5268	53.349	52.9061	40.7218	45.8451	38.6964	35.8983	111.478	42.3171	39.5488	123.763	101.873	116.16	97.5923	149.09	63.3417	115.631	Krt8	15	101996698	102004482	-	1958	protein_coding	keratin 8 [Source:MGI Symbol;Acc:MGI:96705]	-
ENSMUSG00000054312	37.6829	77.2464	64.2939	52.394	81.8683	116.399	104.589	70.8571	74.3694	139.982	98.0706	59.1139	79.4918	66.3602	60.653	73.505	61.8305	44.1684	Mrps21	3	95862634	95871519	-	739	protein_coding	mitochondrial ribosomal protein S21 [Source:MGI Symbol;Acc:MGI:1913542]	-
ENSMUSG00000071052	66.0486	112.226	85.3144	70.2132	95.7923	71.9174	55.4408	88.3026	52.0719	122.438	133.473	50.2132	64.0141	55.1418	67.3173	50.2407	77.4421	36.6849	Rpl7a-ps5	17	57838430	57839221	-	792	processed_pseudogene	ribosomal protein L7A, pseudogene 5 [Source:MGI Symbol;Acc:MGI:3643553]	-
ENSMUSG00000028756	75.6321	100.851	81.373	66.1485	103.48	110.99	103.07	92.4319	34.8202	67.0271	64.9341	37.4744	56.8495	66.097	57.6071	52.0112	121.64	59.9886	Pink1	4	138313409	138326307	-	2673	protein_coding	PTEN induced putative kinase 1 [Source:MGI Symbol;Acc:MGI:1916193]	-
ENSMUSG00000019804	92.9877	88.6128	93.6114	60.7422	97.8093	114.898	84.4028	96.6141	45.1013	101.884	73.9146	48.8608	72.5954	64.1131	43.5602	48.8113	79.4924	38.0099	Snx3	10	42502030	42535381	+	1413	protein_coding	sorting nexin 3 [Source:MGI Symbol;Acc:MGI:1860188]	-
ENSMUSG00000063229	95.7988	82.5825	97.7761	56.9299	65.8131	69.4175	69.6758	56.6364	65.9173	76.9027	76.216	74.3573	73.3161	86.9125	75.0034	92.3093	61.6177	61.9246	Ldha	7	46841475	46855627	+	3310	protein_coding	lactate dehydrogenase A [Source:MGI Symbol;Acc:MGI:96759]	-
ENSMUSG00000074207	2.68711	85.2285	3.52847	57.5327	118.98	171.613	126.481	128.124	55.2899	100.312	100.572	33.4676	85.1962	61.6705	55.0706	46.0333	60.0637	42.8664	Adh1	3	138260991	138290698	+	2233	protein_coding	alcohol dehydrogenase 1 (class I) [Source:MGI Symbol;Acc:MGI:87921]	-
ENSMUSG00000041378	113.978	99.2199	70.7342	256.921	84.2927	56.0961	88.3324	86.8059	64.1975	67.1922	76.9365	9.18119	35.1188	24.4302	68.9429	30.0592	21.4836	79.312	Cldn5	16	18776847	18778262	+	1416	protein_coding	claudin 5 [Source:MGI Symbol;Acc:MGI:1276112]	-
ENSMUSG00000040170	35.412	84.8679	22.1563	48.1723	92.9936	81.9527	106.88	124.59	38.6981	33.3631	70.4074	27.972	139.899	77.4121	69.1448	70.3387	112.38	89.1492	Fmo2	1	162874317	162898726	-	5609	protein_coding	flavin containing monooxygenase 2 [Source:MGI Symbol;Acc:MGI:1916776]	-
ENSMUSG00000028998	41.1646	82.6974	37.5649	50.4632	77.9186	62.3402	91.4812	75.901	78.025	101.841	108.634	60.0054	63.4992	74.5176	67.9797	88.5843	83.5305	65.8151	Tomm7	5	23838944	23844161	-	1125	protein_coding	translocase of outer mitochondrial membrane 7 [Source:MGI Symbol;Acc:MGI:1913419]	-
ENSMUSG00000071072	71.2019	79.8426	44.2626	60.5857	73.8036	57.151	59.6044	64.564	95.9087	77.5929	84.2241	49.7351	87.6568	93.8908	101.262	90.3652	54.4975	65.5081	Ptges3	10	128058954	128077272	+	2217	protein_coding	prostaglandin E synthase 3 [Source:MGI Symbol;Acc:MGI:1929282]	-
ENSMUSG00000086841	90.5809	99.8698	106.977	42.69	93.5086	61.5037	95.641	77.0258	48.6735	87.3357	96.92	69.2133	58.9975	55.9427	51.8051	41.889	74.9096	56.9789	2410006H16Rik	11	62602877	62604807	+	462	processed_transcript	RIKEN cDNA 2410006H16 gene [Source:MGI Symbol;Acc:MGI:1916471]	-
ENSMUSG00000053317	44.6674	93.9844	76.6436	56.5833	78.8532	79.4661	61.5742	69.8223	77.9426	108.433	73.7283	55.2091	83.107	72.9967	73.0622	69.2539	71.0283	62.9999	Sec61b	4	47474658	47483242	+	1271	protein_coding	Sec61 beta subunit [Source:MGI Symbol;Acc:MGI:1913462]	-
ENSMUSG00000032959	46.0345	60.68	31.533	47.9909	69.697	79.4818	65.6534	64.2791	68.0638	60.8584	82.2455	62.9595	111.252	105.366	82.0002	115.872	66.6657	81.7527	Pebp1	5	117282654	117287625	-	1768	protein_coding	phosphatidylethanolamine binding protein 1 [Source:MGI Symbol;Acc:MGI:1344408]	-
ENSMUSG00000026895	98.1023	98.1911	80.6958	49.2729	82.9521	77.8547	75.4511	70.1498	55.1594	105.104	80.2874	58.5687	47.1233	73.4287	54.5994	73.1728	63.3685	58.119	Ndufa8	2	36036326	36049406	-	861	protein_coding	NADH:ubiquinone oxidoreductase subunit A8 [Source:MGI Symbol;Acc:MGI:1915625]	-
ENSMUSG00000056501	150.069	59.035	198.12	52.7682	51.4077	40.1901	44.391	57.5376	114.937	83.1333	77.3458	26.3347	75.2124	50.6282	70.6984	47.1808	49.4609	52.0749	Cebpb	2	167688915	167690418	+	1504	protein_coding	CCAAT/enhancer binding protein (C/EBP), beta [Source:MGI Symbol;Acc:MGI:88373]	C/EBP
ENSMUSG00000004897	87.6643	87.2945	87.0521	59.4956	69.0284	82.4938	67.8833	54.9855	60.5918	88.3689	82.9083	37.7465	79.1087	66.2936	78.768	60.7924	79.178	70.677	Hdgf	3	87906321	87916132	+	2873	protein_coding	hepatoma-derived growth factor [Source:MGI Symbol;Acc:MGI:1194494]	-
ENSMUSG00000051439	676.587	12.3647	299.741	13.1933	10.1442	18.815	10.9261	14.2115	21.4296	31.4769	21.8036	23.5774	24.7952	45.1078	20.5731	29.339	10.5768	12.7278	Cd14	18	36725074	36726736	-	1572	protein_coding	CD14 antigen [Source:MGI Symbol;Acc:MGI:88318]	-
ENSMUSG00000017188	29.1733	60.8093	23.4448	50.3423	98.61	84.2587	100.368	71.7583	64.4803	113.009	76.7194	43.1997	96.2841	98.0595	79.4914	84.8534	61.8585	60.5725	Coa3	11	101277968	101279114	-	886	protein_coding	cytochrome C oxidase assembly factor 3 [Source:MGI Symbol;Acc:MGI:1098757]	-
ENSMUSG00000025130	80.7722	77.3379	39.1396	76.1351	64.4873	55.2115	44.9289	47.7778	84.3649	60.7654	88.8629	74.342	76.1194	82.8324	81.4821	111.622	52.1744	98.1494	P4hb	11	120560298	120573253	-	2861	protein_coding	prolyl 4-hydroxylase, beta polypeptide [Source:MGI Symbol;Acc:MGI:97464]	-
ENSMUSG00000025503	73.2775	70.0604	109.922	50.8942	65.3065	61.1581	76.4989	66.7048	58.7485	89.1798	78.4072	53.2437	79.2274	71.9483	74.9185	72.7853	65.8069	72.865	Taldo1	7	141392199	141402968	+	2171	protein_coding	transaldolase 1 [Source:MGI Symbol;Acc:MGI:1274789]	-
ENSMUSG00000015837	180.994	59.9141	167.829	54.288	55.3212	57.7285	57.1641	65.4376	55.3639	56.503	41.2995	57.5661	72.3732	68.3835	47.8769	71.0316	70.535	49.4678	Sqstm1	11	50199366	50210827	-	3356	protein_coding	sequestosome 1 [Source:MGI Symbol;Acc:MGI:107931]	-
ENSMUSG00000004980	58.1861	72.6154	36.1548	75.4353	79.2666	91.9249	76.6627	71.0954	74.8888	41.4105	72.8992	72.7157	82.0494	85.0425	90.534	75.4159	63.6007	68.0624	Hnrnpa2b1	6	51460932	51469894	-	6584	protein_coding	heterogeneous nuclear ribonucleoprotein A2/B1 [Source:MGI Symbol;Acc:MGI:104819]	-
ENSMUSG00000020708	53.7497	87.3161	79.9006	52.5287	70.7863	67.7291	83.9633	63.2181	55.1831	63.2498	74.8393	49.9902	70.1519	91.7044	75.1694	77.2423	102.664	62.9952	Psmc5	11	106256154	106263120	+	1394	protein_coding	protease (prosome, macropain) 26S subunit, ATPase 5 [Source:MGI Symbol;Acc:MGI:105047]	-
ENSMUSG00000018770	78.9377	68.5278	66.5593	51.277	65.5831	69.9975	83.1977	61.2976	74.4823	76.3612	85.7731	62.3296	79.6909	77.6043	75.578	77.3444	58.4464	66.3839	Atp5g3	2	73908447	73911326	-	2181	protein_coding	ATP synthase, H+ transporting, mitochondrial F0 complex, subunit C3 (subunit 9) [Source:MGI Symbol;Acc:MGI:2442035]	-
ENSMUSG00000096215	50.1878	66.4357	32.9837	38.07	46.5144	36.8365	59.7514	43.9152	78.7753	93.5302	113.553	42.0297	109.783	96.2754	116.826	100.051	84.9613	67.4075	Smim22	16	5007288	5008309	+	561	protein_coding	small integral membrane protein 22 [Source:MGI Symbol;Acc:MGI:3643379]	-
ENSMUSG00000029064	98.1957	88.4749	90.7656	60.1422	93.2272	97.171	83.6021	83.0681	43.3505	94.6943	81.6865	32.7593	54.1944	59.8112	48.9725	42.4762	80.222	44.8742	Gnb1	4	155491361	155559269	+	4268	protein_coding	guanine nucleotide binding protein (G protein), beta 1 [Source:MGI Symbol;Acc:MGI:95781]	-
ENSMUSG00000027940	215.118	63.9168	174.705	49.1555	70.6147	76.6669	71.5905	51.0805	29.878	55.9671	47.3567	31.9015	55.4961	56.6104	52.3379	39.2051	84.6845	48.3772	Tpm3	3	90072649	90100902	+	6085	protein_coding	tropomyosin 3, gamma [Source:MGI Symbol;Acc:MGI:1890149]	-
ENSMUSG00000008683	86.2762	79.5927	76.6544	38.4827	86.3036	77.7213	80.4799	69.0366	57.065	99.3096	91.0906	78.566	71.6567	52.8896	55.7602	45.3079	74.0734	54.3198	Rps15a	7	118104372	118116188	-	6270	protein_coding	ribosomal protein S15A [Source:MGI Symbol;Acc:MGI:2389091]	-
ENSMUSG00000028478	68.9781	62.2222	86.683	53.4537	83.9214	95.9356	83.2627	67.159	45.2445	73.7981	64.7549	52.9578	59.6075	69.6945	68.5564	70.7724	87.6495	66.9199	Clta	4	44004452	44032846	+	1800	protein_coding	clathrin, light polypeptide (Lca) [Source:MGI Symbol;Acc:MGI:894297]	-
ENSMUSG00000081485	27.245	81.5782	60.3117	58.8339	73.995	61.8881	33.1858	61.6278	92.2495	157.397	102.181	43.739	62.8538	87.3253	71.9342	52.7527	72.4853	45.4188	Gm12338	11	75599763	75599954	-	192	processed_pseudogene	predicted gene 12338 [Source:MGI Symbol;Acc:MGI:3650622]	-
ENSMUSG00000022651	481.022	6.68286	618.239	6.43137	9.94171	7.84095	17.0515	2.82926	6.88142	15.6805	15.3743	0.476595	19.1811	3.12913	7.81177	6.10005	17.0307	5.01639	Retnlg	16	48872621	48874496	+	593	protein_coding	resistin like gamma [Source:MGI Symbol;Acc:MGI:2667763]	-
ENSMUSG00000061111	46.8044	100.244	57.6413	76.4687	98.9835	65.1834	65.5838	76.111	53.8411	101.026	75.2562	39.6186	65.0279	75.8338	66.781	49.6607	60.0434	68.6259	Mcrip1	11	120542888	120549727	-	1282	protein_coding	MAPK regulated corepressor interacting protein 1 [Source:MGI Symbol;Acc:MGI:2384752]	-
ENSMUSG00000010406	101.691	73.1702	114.859	55.7111	81.7443	74.1872	76.8138	55.418	56.2901	91.7818	74.1962	43.4326	70.5441	54.5582	49.8542	57.027	61.7471	46.7389	Mrpl52	14	54426909	54429756	+	1109	protein_coding	mitochondrial ribosomal protein L52 [Source:MGI Symbol;Acc:MGI:1916086]	-
ENSMUSG00000051234	77.6223	69.2035	85.3098	45.5118	80.6358	76.4443	92.4126	73.7406	61.1946	89.0245	80.4705	34.8716	70.1915	61.1805	50.6118	53.8423	79.1086	50.0471	Rnf7	9	96470937	96478675	-	1328	protein_coding	ring finger protein 7 [Source:MGI Symbol;Acc:MGI:1337096]	-
ENSMUSG00000055148	34.486	82.1971	74.3943	60.8249	88.065	81.4667	48.5964	114.071	108.117	108.33	84.3511	42.1451	43.108	26.336	77.7033	22.4247	38.9421	94.847	Klf2	8	72319033	72321656	+	1847	protein_coding	Kruppel-like factor 2 (lung) [Source:MGI Symbol;Acc:MGI:1342772]	zf-C2H2
ENSMUSG00000029713	36.5868	85.0088	64.0763	77.2988	82.9535	76.538	64.6972	68.55	62.2972	74.4326	83.3479	50.5689	78.0203	78.9325	48.0869	69.6104	55.4985	65.4365	Gnb2	5	137528127	137533510	-	3402	protein_coding	guanine nucleotide binding protein (G protein), beta 2 [Source:MGI Symbol;Acc:MGI:95784]	-
ENSMUSG00000056629	65.6724	58.2073	36.012	81.4093	68.8041	80.261	58.7068	49.279	58.013	113.953	65.4483	49.2045	92.8929	71.7681	69.0937	83.9315	60.1872	55.1318	Fkbp2	19	6977741	6980461	-	663	protein_coding	FK506 binding protein 2 [Source:MGI Symbol;Acc:MGI:95542]	-
ENSMUSG00000070394	54.1623	97.0026	55.2064	69.8498	80.2909	85.6767	75.3369	82.1494	55.8653	129.38	119.478	30.4727	48.0784	35.0844	50.811	48.0128	54.6144	45.2855	Tmem256	11	69838514	69839618	+	1105	protein_coding	transmembrane protein 256 [Source:MGI Symbol;Acc:MGI:1916436]	-
ENSMUSG00000025283	174.098	48.0281	159.704	46.391	54.037	39.9021	44.9898	41.7957	68.3254	45.4321	53.1261	60.8819	43.3037	52.6055	72.7037	68.5258	61.4473	78.9431	Sat1	X	155213132	155216449	-	2774	protein_coding	spermidine/spermine N1-acetyl transferase 1 [Source:MGI Symbol;Acc:MGI:98233]	-
ENSMUSG00000094392	38.4636	83.2549	35.1117	36.589	104.463	65.5286	141.57	101.938	19.7905	234.417	72.9766	50.7649	55.5867	43.3682	39.1078	31.031	31.6958	27.8655	Gm3788	3	86672033	86672168	-	136	processed_pseudogene	predicted gene 3788 [Source:MGI Symbol;Acc:MGI:3781961]	-
ENSMUSG00000022285	101.175	82.3263	73.8659	59.5016	73.2476	77.3442	74.8746	67.6529	59.4774	65.8457	67.2307	54.1692	52.918	63.5187	61.0264	57.6243	65.1395	54.0788	Ywhaz	15	36770770	36796929	-	4118	protein_coding	tyrosine 3-monooxygenase/tryptophan 5-monooxygenase activation protein, zeta polypeptide [Source:MGI Symbol;Acc:MGI:109484]	-
ENSMUSG00000025868	55.796	83.5804	39.4248	56.6689	76.8101	67.768	51.7292	70.7238	69.4048	106.085	71.0594	60.4371	48.1638	73.2249	57.6532	85.037	77.7358	57.8543	Higd2a	13	54590207	54591158	+	648	protein_coding	HIG1 domain family, member 2A [Source:MGI Symbol;Acc:MGI:1914294]	-
ENSMUSG00000043483	71.8471	87.2344	55.3727	45.3453	68.6859	70.4682	88.2051	86.0811	57.0629	35.7677	95.9892	70.4648	62.4857	55.5381	70.3409	55.0751	80.9454	52.2184	Gm6863	12	96922423	96923058	-	636	processed_pseudogene	predicted gene 6863 [Source:MGI Symbol;Acc:MGI:3647386]	-
ENSMUSG00000002015	46.9515	61.3814	23.21	75.0871	53.5163	30.1969	37.4978	39.5514	97.2931	61.4328	51.4067	72.1374	95.3003	96.2255	102.991	116.324	50.6182	97.1104	Bcap31	X	73686178	73716175	-	1219	protein_coding	B cell receptor associated protein 31 [Source:MGI Symbol;Acc:MGI:1350933]	-
ENSMUSG00000026574	49.8867	93.8082	28.8063	84.5475	106.737	141.145	103.886	133.171	57.2609	63.5674	134.817	35.1286	12.793	24.9091	38.0409	26.7873	43.2921	29.2622	Dpt	1	164796644	164824266	+	1724	protein_coding	dermatopontin [Source:MGI Symbol;Acc:MGI:1928392]	-
ENSMUSG00000005779	100.388	64.7576	104.756	52.2954	58.1563	61.302	69.3638	70.2438	56.6063	88.0017	64.771	53.0186	63.8458	59.7488	56.7649	71.846	48.4185	60.6127	Psmb4	3	94884093	94886961	-	1951	protein_coding	proteasome (prosome, macropain) subunit, beta type 4 [Source:MGI Symbol;Acc:MGI:1098257]	-
ENSMUSG00000110332	17.4442	24.4804	0	23.8189	21.7183	33.2459	28.8631	34.2747	103.762	25.9499	36.1892	89.6568	191.49	174.443	86.1792	183.083	49.4405	77.1703	Gm19935	8	90816145	90817393	-	979	protein_coding	predicted gene, 19935 [Source:MGI Symbol;Acc:MGI:5012120]	-
ENSMUSG00000021124	94.3933	78.1419	94.941	44.1856	89.9916	82.2861	93.231	71.7595	32.801	65.8208	76.7456	29.4543	54.9426	63.9272	47.7085	45.254	92.2179	41.5079	Vti1b	12	79156017	79172667	-	1612	protein_coding	vesicle transport through interaction with t-SNAREs 1B [Source:MGI Symbol;Acc:MGI:1855688]	-
ENSMUSG00000030125	5.0575	24.4867	0	36.5104	47.9331	18.6959	6.55029	18.1799	115.414	30.0683	47.3865	69.5726	124.073	155.166	146.166	196.582	61.1543	92.3563	Lrrc23	6	124769863	124779727	-	1734	protein_coding	leucine rich repeat containing 23 [Source:MGI Symbol;Acc:MGI:1315192]	-
ENSMUSG00000028648	59.9317	72.961	29.7061	58.4529	81.9248	81.5497	62.3316	72.901	60.5742	88.6221	89.1032	53.7074	52.0169	56.1759	64.4384	73.7486	68.3114	61.2665	Ndufs5	4	123712710	123718202	-	860	protein_coding	NADH:ubiquinone oxidoreductase core subunit S5 [Source:MGI Symbol;Acc:MGI:1890889]	-
ENSMUSG00000037242	211.936	78.2324	152.785	50.3267	64.1467	80.9693	79.3951	78.3598	22.7759	50.6323	52.3817	15.3708	44.5347	46.587	31.6798	26.7685	65.3285	31.6349	Clic4	4	135213969	135272814	-	6572	protein_coding	chloride intracellular channel 4 (mitochondrial) [Source:MGI Symbol;Acc:MGI:1352754]	-
ENSMUSG00000025795	21.353	91.2235	30.9526	49.6127	99.6525	107.89	104.628	71.7314	33.177	73.5618	63.1318	26.16	35.2218	97.1195	48.0158	47.5093	145.211	35.4029	Rassf3	10	121410350	121476347	-	3826	protein_coding	Ras association (RalGDS/AF-6) domain family member 3 [Source:MGI Symbol;Acc:MGI:2179722]	-
ENSMUSG00000020483	60.1697	68.3181	58.25	37.7557	92.4429	95.641	100.19	58.3197	32.3365	53.5279	55.2138	29.2921	47.3526	83.8071	50.2763	58.7243	149.99	47.4071	Dynll2	11	87979525	87987533	-	2736	protein_coding	dynein light chain LC8-type 2 [Source:MGI Symbol;Acc:MGI:1915347]	-
ENSMUSG00000084349	57.2186	69.324	51.797	39.2937	89.5378	77.0677	73.2639	62.0307	53.8159	69.5745	79.6388	61.5961	90.7932	57.7814	67.1391	49.7258	69.9269	59.4405	Rpl3-ps1	X	13202571	13203780	+	1210	processed_pseudogene	ribosomal protein L3, pseudogene 1 [Source:MGI Symbol;Acc:MGI:3644217]	-
ENSMUSG00000040652	42.966	79.9024	50.8662	75.4621	68.2667	74.5573	95.2462	63.0522	50.1193	63.9193	65.306	27.722	60.7966	76.5547	61.57	72.1248	75.0087	69.4651	Oaz2	9	65668001	65690300	+	2990	protein_coding	ornithine decarboxylase antizyme 2 [Source:MGI Symbol;Acc:MGI:109492]	-
ENSMUSG00000084838	64.5543	67.6325	41.7412	44.0689	114.219	113.352	106.065	85.5238	46.7509	30.1901	41.9654	35.2923	63.0508	56.7702	53.5405	55.2296	102.491	50.0108	Gm10241	16	20176727	20177012	-	286	processed_pseudogene	predicted pseudogene 10241 [Source:MGI Symbol;Acc:MGI:3704461]	-
ENSMUSG00000040808	91.6716	177.113	52.9748	151.19	86.7805	64.3099	71.2773	68.4345	50.6468	66.7642	104.105	5.38326	17.628	31.2024	40.8372	28.2604	33.3561	26.8268	S100g	X	162961992	162964599	-	480	protein_coding	S100 calcium binding protein G [Source:MGI Symbol;Acc:MGI:104528]	-
ENSMUSG00000020048	37.7767	71.4219	22.591	87.3816	75.0497	41.6432	38.7168	49.8235	89.1917	49.9537	91.5625	46.5227	71.1276	83.4956	114.156	68.7669	57.915	70.1697	Hsp90b1	10	86690209	86705509	-	4032	protein_coding	heat shock protein 90, beta (Grp94), member 1 [Source:MGI Symbol;Acc:MGI:98817]	-
ENSMUSG00000052397	53.5918	51.9673	46.4457	50.7513	45.9732	47.1878	37.8494	42.1651	73.0475	24.4274	49.2487	69.1152	135.402	119.307	91.1953	96.4438	48.628	80.4216	Ezr	17	6738041	6782784	-	3290	protein_coding	ezrin [Source:MGI Symbol;Acc:MGI:98931]	-
ENSMUSG00000007872	92.1752	81.1848	84.7857	90.8555	77.5978	58.99	104.795	87.563	43.5812	94.1945	61.2786	24.9325	67.8456	38.7781	40.2581	24.0684	42.6353	41.2956	Id3	4	136143497	136145755	+	1791	protein_coding	inhibitor of DNA binding 3 [Source:MGI Symbol;Acc:MGI:96398]	bHLH
ENSMUSG00000028745	114.68	70.3305	95.7138	53.7177	67.0286	76.1871	80.1949	64.5339	35.0292	61.8079	73.5316	42.2469	60.8204	54.3382	43.8285	46.3085	64.4364	50.9648	Capzb	4	139192899	139291818	+	3299	protein_coding	capping protein (actin filament) muscle Z-line, beta [Source:MGI Symbol;Acc:MGI:104652]	-
ENSMUSG00000028618	40.1099	57.6413	38.032	90.7341	49.4514	40.4561	50.9998	48.1455	94.551	62.1864	76.9552	66.7082	60.6189	69.8162	90.2493	95.7407	41.5728	79.3983	Tmem59	4	107178399	107200996	+	2056	protein_coding	transmembrane protein 59 [Source:MGI Symbol;Acc:MGI:1929278]	-
ENSMUSG00000004665	54.4119	72.531	48.674	70.3109	73.3099	84.8452	96.2282	78.1083	37.4821	71.6831	65.396	54.3578	44.3765	56.8957	49.0996	39.2122	97.0268	58.7722	Cnn2	10	79988584	79996062	+	2460	protein_coding	calponin 2 [Source:MGI Symbol;Acc:MGI:105093]	-
ENSMUSG00000086922	97.2539	45.456	117.811	44.1165	54.4607	69.387	46.5086	54.3995	52.2206	69.0847	61.3246	37.6632	68.0396	90.1667	60.4877	62.5771	69.5814	52.1714	Gm13835	6	31141979	31142663	-	685	processed_pseudogene	predicted gene 13835 [Source:MGI Symbol;Acc:MGI:3650921]	-
ENSMUSG00000022216	49.8686	87.1796	58.6361	45.908	68.8645	61.9771	88.1628	56.6032	46.5755	89.3745	65.8784	67.5344	76.169	61.3505	57.863	49.7812	57.2038	58.016	Psme1	14	55578123	55581529	+	2209	protein_coding	proteasome (prosome, macropain) activator subunit 1 (PA28 alpha) [Source:MGI Symbol;Acc:MGI:1096367]	-
ENSMUSG00000003541	230.442	51.8914	184.084	99.4276	28.712	30.2625	51.0704	45.1272	44.3711	43.8971	32.5501	13.244	40.0437	35.0396	64.2438	36.1946	56.8435	57.9357	Ier3	17	35821684	35822923	+	1131	protein_coding	immediate early response 3 [Source:MGI Symbol;Acc:MGI:104814]	-
ENSMUSG00000038612	125.946	58.496	143.549	52.5276	68.2011	76.5198	60.3418	55.0018	54.0294	51.2517	56.5882	59.2269	43.7888	45.9512	49.7316	36.9176	56.4998	50.0607	Mcl1	3	95658788	95663176	+	3418	protein_coding	myeloid cell leukemia sequence 1 [Source:MGI Symbol;Acc:MGI:101769]	-
ENSMUSG00000030647	43.8709	75.5846	37.9989	53.8085	76.5225	57.8984	38.0272	49.8898	90.623	65.4053	65.2022	47.3891	59.8815	66.2706	91.701	82.2774	66.6441	74.6896	Ndufc2	7	97400003	97407802	+	754	protein_coding	NADH:ubiquinone oxidoreductase subunit C2 [Source:MGI Symbol;Acc:MGI:1344370]	-
ENSMUSG00000032199	70.3897	70.0271	97.07	43.7841	86.6788	91.2737	78.0573	74.5326	37.4299	64.5277	54.3221	35.0445	60.715	58.3968	44.0603	44.7192	86.2228	44.2967	Polr2m	9	71478437	71485935	-	2424	protein_coding	polymerase (RNA) II (DNA directed) polypeptide M [Source:MGI Symbol;Acc:MGI:107282]	-
ENSMUSG00000021024	195.747	51.0009	155.271	29.9641	50.3596	52.019	53.318	52.8814	41.7933	51.6706	50.2207	49.9282	45.975	69.9224	37.6091	55.5009	51.7995	43.3914	Psma6	12	55384222	55418454	+	1234	protein_coding	proteasome (prosome, macropain) subunit, alpha type 6 [Source:MGI Symbol;Acc:MGI:1347006]	-
ENSMUSG00000044894	71.6755	72.3513	77.5219	46.419	53.8391	65.108	46.6002	51.3129	56.9495	121.882	74.6255	71.6861	72.4619	47.7756	51.3959	59.301	49.7756	47.493	Uqcrq	11	53427922	53430831	-	1831	protein_coding	ubiquinol-cytochrome c reductase, complex III subunit VII [Source:MGI Symbol;Acc:MGI:107807]	-
ENSMUSG00000065126	35.1667	40.4381	0	103.777	42.8006	60.8887	17.809	63.0733	93.0247	116.232	77.4861	91.7077	12.8804	38.8156	88.8486	59.4275	103.807	90.2312	Snord104	11	106500993	106501062	+	70	snoRNA	small nucleolar RNA, C/D box 104 [Source:MGI Symbol;Acc:MGI:3819515]	-
ENSMUSG00000070473	41.3048	42.6436	23.7053	58.5074	29.0937	31.8022	27.5049	29.3874	100.615	56.9752	47.1152	70.6793	61.8088	117.224	88.2378	170.284	28.0756	104.706	Cldn3	5	134986214	134987472	+	1259	protein_coding	claudin 3 [Source:MGI Symbol;Acc:MGI:1329044]	-
ENSMUSG00000030161	58.9278	58.1226	90.0835	38.6856	56.4131	72.9521	81.127	74.397	29.0704	52.4615	45.4625	28.0395	95.851	83.5213	52.6301	61.4568	84.677	60.4057	Gabarapl1	6	129533160	129542346	+	2013	protein_coding	gamma-aminobutyric acid (GABA) A receptor-associated protein-like 1 [Source:MGI Symbol;Acc:MGI:1914980]	-
ENSMUSG00000058603	57.6025	79.5413	70.9359	36.8483	85.6746	110.439	83.3095	83.3969	32.9256	52.541	96.7282	45.9332	42.2166	58.1068	47.1402	36.5519	64.5554	38.781	Rpl28-ps1	1	128038569	128038982	+	414	processed_pseudogene	ribosomal protein L28, pseudogene 1 [Source:MGI Symbol;Acc:MGI:3705349]	-
ENSMUSG00000002504	16.6329	104.054	30.202	91.537	85.299	72.1613	64.3783	97.7314	53.5479	128.231	75.7775	16.7795	51.072	46.9208	45.648	37.5837	65.3184	40.1899	Slc9a3r2	17	24639282	24650305	-	2257	protein_coding	solute carrier family 9 (sodium/hydrogen exchanger), member 3 regulator 2 [Source:MGI Symbol;Acc:MGI:1890662]	-
ENSMUSG00000022452	85.5093	79.7461	55.3716	41.9949	64.5617	74.2287	83.4459	51.883	36.0442	82.4054	73.0351	37.8357	62.6501	62.5515	50.8967	61.5117	66.2021	52.7072	Smdt1	15	82338959	82349091	+	1479	protein_coding	single-pass membrane protein with aspartate rich tail 1 [Source:MGI Symbol;Acc:MGI:1916279]	-
ENSMUSG00000015092	62.1492	68.6352	79.4053	58.606	66.2656	69.4334	77.829	61.4833	42.5875	81.699	67.9109	51.4414	53.6626	50.7219	49.9272	60.7008	71.727	45.9477	Edf1	2	25557847	25562082	+	1317	protein_coding	endothelial differentiation-related factor 1 [Source:MGI Symbol;Acc:MGI:1891227]	-
ENSMUSG00000031633	64.4057	65.9647	56.1131	49.6744	66.0466	88.8681	87.5356	72.3533	32.5448	47.4215	59.6887	69.1668	59.4226	58.3564	49.2543	58.4184	85.0559	49.1142	Slc25a4	8	46206797	46211284	-	2353	protein_coding	solute carrier family 25 (mitochondrial carrier, adenine nucleotide translocator), member 4 [Source:MGI Symbol;Acc:MGI:1353495]	-
ENSMUSG00000037894	99.4509	56.5815	115.347	35.1766	65.1929	67.7788	52.255	54.7913	50.7934	58.3404	58.4172	50.5363	49.2052	57.3897	57.1899	62.9706	70.4569	56.4896	H2afz	3	137864487	137866922	+	1776	protein_coding	H2A histone family, member Z [Source:MGI Symbol;Acc:MGI:1888388]	-
ENSMUSG00000021290	71.6807	64.351	57.2866	43.3953	81.5579	55.3989	54.7457	51.7336	61.8534	110.925	71.5946	68.0759	64.7398	57.1223	50.47	60.6356	43.0102	47.7477	Atp5mpl	12	111961375	111966977	-	1217	protein_coding	ATP synthase membrane subunit 6.8PL [Source:MGI Symbol;Acc:MGI:1917507]	-
ENSMUSG00000000171	92.9875	58.4836	56.9261	43.5214	69.7959	55.0836	53.8981	58.3902	68.4851	53.0105	72.7491	48.41	65.8064	59.8104	57.3525	78.9485	64.5319	55.7783	Sdhd	9	50596357	50603812	-	1231	protein_coding	succinate dehydrogenase complex, subunit D, integral membrane protein [Source:MGI Symbol;Acc:MGI:1914175]	-
ENSMUSG00000009013	12.1818	86.9332	13.319	49.0299	80.7458	70.3562	73.4234	73.7065	66.0435	83.9619	80.012	50.5978	61.9567	78.0085	54.7788	66.8446	52.4938	44.6255	Dynll1	5	115297110	115300999	-	3890	protein_coding	dynein light chain LC8-type 1 [Source:MGI Symbol;Acc:MGI:1861457]	-
ENSMUSG00000020390	63.8286	60.8917	62.3852	56.0376	55.6877	57.957	53.3601	61.7204	69.7525	46.3147	57.1053	51.0853	73.0422	60.535	77.6946	66.5559	64.4191	60.4919	Ube2b	11	51985497	52000762	-	2126	protein_coding	ubiquitin-conjugating enzyme E2B [Source:MGI Symbol;Acc:MGI:102944]	-
ENSMUSG00000018102	30.2119	62.2779	32.0136	63.9718	61.8671	87.9301	68.0591	62.8659	45.2141	77.9955	56.3048	27.5915	91.1946	67.4171	79.2916	66.5472	65.4159	51.783	Hist1h2bc	13	23684199	23692908	+	1156	protein_coding	histone cluster 1, H2bc [Source:MGI Symbol;Acc:MGI:1915274]	-
ENSMUSG00000029373	85.3561	30.8848	51.3284	35.2136	112.33	37.4397	64.5505	71.6463	37.9324	54.8112	52.5004	20.8872	83.6888	59.1931	56.6347	39.3842	97.3672	106.311	Pf4	5	90772435	90773383	+	721	protein_coding	platelet factor 4 [Source:MGI Symbol;Acc:MGI:1888711]	-
ENSMUSG00000024048	192.089	48.5819	116.786	28.2684	71.1042	65.3477	81.9133	69.8536	23.282	67.9008	47.6388	22.0017	46.6707	48.7956	30.6502	35.7785	71.9172	27.7	Myl12a	17	70993656	71002878	-	3360	protein_coding	myosin, light chain 12A, regulatory, non-sarcomeric [Source:MGI Symbol;Acc:MGI:1914518]	-
ENSMUSG00000039168	74.01	64.3088	65.3023	43.1523	72.9995	83.0636	80.2305	66.009	45.3284	82.0309	70.9814	31.3977	57.3582	51.9837	53.4986	42.2491	64.4916	47.5024	Dap	15	31224314	31274341	+	1925	protein_coding	death-associated protein [Source:MGI Symbol;Acc:MGI:1918190]	-
ENSMUSG00000031375	48.964	72.0159	27.7946	78.7362	75.5234	95.4231	87.4829	90.1268	34.7064	46.092	69.784	28.2667	84.3551	48.1681	46.4299	34.5383	64.4581	54.9074	Bgn	X	73483602	73495933	+	6099	protein_coding	biglycan [Source:MGI Symbol;Acc:MGI:88158]	-
ENSMUSG00000008036	47.4524	89.0993	68.5299	56.6296	89.293	66.597	63.9877	63.0476	43.7064	80.2028	80.5952	49.2338	54.0429	56.6811	53.0328	39.8922	38.1531	47.1444	Ap2s1	7	16738410	16749294	+	1472	protein_coding	adaptor-related protein complex 2, sigma 1 subunit [Source:MGI Symbol;Acc:MGI:2141861]	-
ENSMUSG00000026921	52.674	92.3267	53.0392	143.381	63.9902	63.4067	59.1424	77.3541	48.2485	100.017	60.0388	20.3733	29.7876	29.906	52.1992	20.9268	34.9776	82.603	Egfl7	2	26580014	26593120	+	3581	protein_coding	EGF-like domain 7 [Source:MGI Symbol;Acc:MGI:2449923]	-
ENSMUSG00000025630	95.8457	67.5641	58.7175	45.2826	60.3572	64.8294	67.8066	58.2975	48.0928	64.4087	53.0916	42.567	46.4883	66.4762	71.6094	56.5938	61.1505	54.3749	Hprt	X	52988137	53021659	+	1289	protein_coding	hypoxanthine guanine phosphoribosyl transferase [Source:MGI Symbol;Acc:MGI:96217]	-
ENSMUSG00000087006	362.641	19.1829	364.229	38.3311	32.3544	26.2584	32.4395	26.1355	13.3478	21.2329	24.9546	11.3698	26.6562	20.9	16.8242	13.2098	12.5638	16.6277	Gm13889	2	93955810	93957201	-	1392	protein_coding	predicted gene 13889 [Source:MGI Symbol;Acc:MGI:3652053]	-
ENSMUSG00000024012	26.4086	72.8813	29.4509	72.6817	80.1917	68.4384	73.8295	65.9048	45.0406	77.5418	75.8271	35.7029	69.7897	56.3	56.5441	58.3616	58.5849	54.8236	Mtch1	17	29332072	29347904	-	2878	protein_coding	mitochondrial carrier 1 [Source:MGI Symbol;Acc:MGI:1929261]	-
ENSMUSG00000017009	310.427	42.3063	115.958	42.9816	35.4408	26.0648	25.8321	35.2933	52.9051	28.424	49.7052	40.422	59.6074	43.4779	45.9237	55.176	21.5181	43.0374	Sdc4	2	164424247	164443887	-	2547	protein_coding	syndecan 4 [Source:MGI Symbol;Acc:MGI:1349164]	-
ENSMUSG00000025068	66.9204	27.6642	30.2089	24.5099	27.0099	39.5743	28.4349	33.2032	62.8232	33.6648	37.5887	361.667	50.572	60.546	40.8001	75.1159	27.4734	46.5473	Gsto1	19	47854970	47864790	+	1968	protein_coding	glutathione S-transferase omega 1 [Source:MGI Symbol;Acc:MGI:1342273]	-
ENSMUSG00000036299	39.6759	70.9244	24.6285	52.8697	66.5541	59.0894	57.2845	57.519	53.6528	40.5995	48.2782	42.0326	86.4464	94.0574	61.1227	78.7152	62.1098	78.6191	BC031181	18	75005900	75009933	+	1047	protein_coding	cDNA sequence BC031181 [Source:MGI Symbol;Acc:MGI:3039614]	-
ENSMUSG00000031954	92.4694	63.3576	76.2085	35.1811	66.2906	85.3012	78.6641	75.5594	38.9156	51.8717	65.3438	31.6689	57.9339	53.219	40.6713	41.5061	80.6087	31.4443	Cfdp1	8	111768491	111854291	-	1178	protein_coding	craniofacial development protein 1 [Source:MGI Symbol;Acc:MGI:1344403]	-
ENSMUSG00000091086	76.4856	53.4068	44.2706	37.573	80.0024	82.1509	35.7816	62.4505	40.7699	67.2952	82.5456	66.889	81.7778	44.5862	45.4039	41.1154	78.478	44.0713	Rpl6l	10	111125851	111126721	+	871	processed_pseudogene	ribosomal protein L6-like [Source:MGI Symbol;Acc:MGI:3647789]	-
ENSMUSG00000016319	98.6126	38.7511	99.5074	23.126	60.7123	55.0843	48.9766	52.2519	39.9302	55.2813	43.0489	81.4602	67.4176	85.3143	24.7035	102.813	48.2617	38.5462	Slc25a5	X	36795651	36798807	+	1646	protein_coding	solute carrier family 25 (mitochondrial carrier, adenine nucleotide translocator), member 5 [Source:MGI Symbol;Acc:MGI:1353496]	-
ENSMUSG00000029030	70.5452	82.3191	61.7666	48.2132	81.9038	74.3723	87.0504	83.8126	34.5433	69.0993	69.5414	35.9084	44.9483	35.9434	40.2906	30.3864	76.9069	36.0421	Tprgl	4	154157485	154160666	-	2242	protein_coding	transformation related protein 63 regulated like [Source:MGI Symbol;Acc:MGI:1915058]	-
ENSMUSG00000021178	118.276	50.131	111.104	36.9796	69.4975	57.7302	70.0097	66.284	34.4507	46.2145	57.8516	30.9962	50.9136	46.6259	41.5611	50.0587	77.0951	46.0831	Psmc1	12	100110154	100123405	+	1933	protein_coding	protease (prosome, macropain) 26S subunit, ATPase 1 [Source:MGI Symbol;Acc:MGI:106054]	-
ENSMUSG00000025491	166.652	40.2779	230.357	24.1039	31.5382	40.7308	36.3379	33.739	22.3803	79.5319	47.47	150.057	24.9149	31.1363	22.4264	18.0205	35.9126	20.263	Ifitm1	7	140967221	140969825	+	1094	protein_coding	interferon induced transmembrane protein 1 [Source:MGI Symbol;Acc:MGI:1915963]	-
ENSMUSG00000105388	58.4743	52.3218	71.0329	29.1933	61.4202	90.5312	81.9868	41.8131	28.1296	101.903	87.003	46.6633	58.3367	28.903	47.5692	47.7052	77.5031	43.7963	Rpl36a-ps2	3	145879020	145879340	+	321	processed_pseudogene	ribosomal protein L36A, pseudogene 2 [Source:MGI Symbol;Acc:MGI:3780887]	-
ENSMUSG00000086583	45.1447	68.2434	48.2674	28.3375	66.2014	44.7426	75.3063	80.5902	46.2659	69.9054	65.1205	66.3662	58.1936	63.9943	36.4102	46.8584	93.1865	50.5871	Gm15500	7	114705217	114706235	-	1019	transcribed_processed_pseudogene	predicted pseudogene 15500 [Source:MGI Symbol;Acc:MGI:3782947]	-
ENSMUSG00000007041	91.0811	49.8789	88.0584	58.6319	61.4584	48.1021	49.123	57.7722	47.924	49.4722	59.1458	61.2686	48.6918	63.1025	58.5569	56.3008	48.4702	56.311	Clic1	17	35049966	35058749	+	1799	protein_coding	chloride intracellular channel 1 [Source:MGI Symbol;Acc:MGI:2148924]	-
ENSMUSG00000025066	76.0039	66.8774	72.7742	39.2818	74.9117	77.0215	71.4886	75.7517	39.2706	52.8661	71.7361	32.0088	35.9704	52.0368	54.7603	40.8273	76.9464	40.9813	Sfr1	19	47731756	47735588	+	1583	protein_coding	SWI5 dependent recombination repair 1 [Source:MGI Symbol;Acc:MGI:1915038]	-
ENSMUSG00000051695	51.2007	62.3881	44.3597	60.1197	63.6916	68.6019	58.8119	57.7586	61.0608	72.0439	54.1078	58.3334	51.8085	62.6854	60.3541	64.7693	48.2549	50.5918	Pcbp1	6	86524492	86526321	-	1830	protein_coding	poly(rC) binding protein 1 [Source:MGI Symbol;Acc:MGI:1345635]	-
ENSMUSG00000074227	27.7924	40.5298	19.5211	62.4552	45.6504	28.0938	20.7954	29.7895	76.418	39.6892	70.2409	59.0286	98.7667	97.9804	111.025	104.037	37.7647	80.5511	Spint2	7	29256323	29281912	-	4556	protein_coding	serine protease inhibitor, Kunitz type 2 [Source:MGI Symbol;Acc:MGI:1338031]	-
ENSMUSG00000029430	113.094	55.5935	114.778	37.6946	61.2533	57.8428	60.4104	51.8602	43.0506	51.4579	51.4219	42.5717	43.6685	57.6549	53.8182	51.6078	55.7622	43.0288	Ran	5	129020069	129024323	+	2646	protein_coding	RAN, member RAS oncogene family [Source:MGI Symbol;Acc:MGI:1333112]	-
ENSMUSG00000028062	30.8214	69.6434	34.5986	42.1072	67.6843	63.9427	61.2967	51.1836	48.9716	86.84	77.6945	33.5128	81.7124	56.4769	59.5493	63.2092	62.4905	49.6155	Lamtor2	3	88549819	88553074	-	1218	protein_coding	late endosomal/lysosomal adaptor, MAPK and MTOR activator 2 [Source:MGI Symbol;Acc:MGI:1932697]	-
ENSMUSG00000032288	87.5838	59.636	91.0853	48.272	52.9255	58.8479	76.6028	53.4211	39.465	80.8664	55.8289	51.9537	36.7046	51.6394	48.5557	46.8478	50.384	50.6724	Imp3	9	56937475	56938398	+	924	protein_coding	IMP3, U3 small nucleolar ribonucleoprotein [Source:MGI Symbol;Acc:MGI:1916119]	-
ENSMUSG00000032348	34.757	37.6379	17.0677	30.0387	29.6199	46.3173	39.9351	39.6873	105.134	34.3633	44.9404	98.5443	50.2364	78.572	73.012	133.912	47.9608	97.3033	Gsta4	9	78182774	78209349	+	1266	protein_coding	glutathione S-transferase, alpha 4 [Source:MGI Symbol;Acc:MGI:1309515]	-
ENSMUSG00000027248	63.767	52.0924	28.7516	67.5062	52.7415	43.7795	35.787	40.874	63.5338	41.4189	70.0002	60.0408	68.5605	74.7576	86.9053	77.4977	40.4913	70.3868	Pdia3	2	121413775	121438687	+	3139	protein_coding	protein disulfide isomerase associated 3 [Source:MGI Symbol;Acc:MGI:95834]	-
ENSMUSG00000047714	177.868	52.1293	140.809	37.1809	57.1825	62.6299	65.8568	63.025	25.2256	50.3747	49.5929	17.0136	39.0049	33.4786	38.9799	26.9399	60.0826	33.9488	Ppp1r2	16	31251537	31275277	-	4440	protein_coding	protein phosphatase 1, regulatory inhibitor subunit 2 [Source:MGI Symbol;Acc:MGI:1914099]	-
ENSMUSG00000029455	20.4099	61.2777	33.0472	51.7903	56.5248	57.3727	75.1481	64.2028	44.4617	45.1556	51.7813	41.6898	65.9057	81.8104	61.7196	89.8804	55.4296	69.8292	Aldh2	5	121566027	121593824	-	5126	protein_coding	aldehyde dehydrogenase 2, mitochondrial [Source:MGI Symbol;Acc:MGI:99600]	-
ENSMUSG00000021606	96.4588	71.5547	41.6101	32.9648	74.0454	55.8054	99.9526	64.2111	39.4474	51.7737	66.3128	57.2796	51.3604	45.9023	37.7816	50.7554	51.2942	38.1176	Ndufs6	13	73319838	73328542	-	898	protein_coding	NADH:ubiquinone oxidoreductase core subunit S6 [Source:MGI Symbol;Acc:MGI:107932]	-
ENSMUSG00000019173	96.1415	60.0366	123.243	43.1261	56.4285	47.4481	70.9619	58.0768	34.3493	66.9026	52.6002	35.6819	50.547	44.0394	39.0411	39.3224	68.3167	39.0223	Rab5c	11	100715009	100738215	-	2194	protein_coding	RAB5C, member RAS oncogene family [Source:MGI Symbol;Acc:MGI:105306]	-
ENSMUSG00000094989	82.1088	79.2	27.8347	32.6834	78.2853	66.252	70.0946	52.3105	40.1875	77.4306	72.7509	34.1684	60.7313	59.4031	59.8568	37.1729	41.4791	49.4766	Rpl9-ps4	13	72454762	72455340	-	579	processed_pseudogene	ribosomal protein L9, pseudogene 4 [Source:MGI Symbol;Acc:MGI:3704410]	-
ENSMUSG00000037443	189.858	15.1857	380.479	6.81079	21.3506	32.7246	36.8829	17.1611	12.82	57.6701	53.2671	26.8499	53.8499	16.8035	16.4032	14.8291	47.8011	20.2162	Cep85	4	134129858	134187112	-	5269	protein_coding	centrosomal protein 85 [Source:MGI Symbol;Acc:MGI:1917262]	-
ENSMUSG00000064343	41.1723	65.1186	50.4422	4.60419	149.734	38.2016	107.3	54.7227	110.057	0	198.301	11.9417	30.2821	23.3347	24.7689	1.69828	98.8757	6.88725	mt-Tq	MT	3772	3842	-	71	Mt_tRNA	mitochondrially encoded tRNA glutamine [Source:MGI Symbol;Acc:MGI:102477]	-
ENSMUSG00000018326	65.8271	77.8391	67.1026	52.8075	71.7847	77.4871	70.9775	72.4279	42.3333	45.2182	70.9081	31.3015	32.9758	46.5775	47.4201	39.9489	53.1682	45.039	Ywhab	2	163994960	164018588	+	3382	protein_coding	tyrosine 3-monooxygenase/tryptophan 5-monooxygenase activation protein, beta polypeptide [Source:MGI Symbol;Acc:MGI:1891917]	-
ENSMUSG00000048489	101.512	25.7775	37.8007	24.0452	28.6096	31.1006	37.1276	18.5969	66.5558	21.5199	38.4116	28.3929	116.751	88.3282	139.416	91.7207	55.4134	57.8236	Depp1	6	116650609	116652794	+	1358	protein_coding	DEPP1 autophagy regulator [Source:MGI Symbol;Acc:MGI:1918730]	-
ENSMUSG00000041881	66.8421	63.8467	50.9522	43.0695	44.204	43.9638	58.8748	56.0651	60.23	77.2147	73.2729	44.7181	50.6816	55.1281	60.6697	62.628	47.2805	47.7448	Ndufa7	17	33824591	33838316	+	1701	protein_coding	NADH:ubiquinone oxidoreductase subunit A7 [Source:MGI Symbol;Acc:MGI:1913666]	-
ENSMUSG00000040385	48.198	53.1648	87.0893	36.3746	75.9015	69.5898	68.4035	56.2216	19.5179	62.4929	53.3088	60.7813	53.2617	68.9137	34.2144	50.6706	68.5914	37.174	Ppp1ca	19	4192158	4195419	+	1379	protein_coding	protein phosphatase 1 catalytic subunit alpha [Source:MGI Symbol;Acc:MGI:103016]	-
ENSMUSG00000091337	29.3879	72.7615	31.9805	45.9447	76.1856	98.3769	86.5819	70.7569	39.7404	76.2966	71.6588	32.3998	49.4227	48.7134	45.708	29.5918	56.9556	40.8701	Eid1	2	125673095	125674785	+	1691	protein_coding	EP300 interacting inhibitor of differentiation 1 [Source:MGI Symbol;Acc:MGI:1889651]	-
ENSMUSG00000075701	34.6876	52.8953	33.0578	54.9624	37.7556	27.1083	17.8184	33.1209	82.7082	31.9275	60.1636	41.1398	61.7018	95.5247	108.523	91.3108	48.2804	90.6313	Selenos	7	66079649	66089405	+	1477	protein_coding	selenoprotein S [Source:MGI Symbol;Acc:MGI:95994]	-
ENSMUSG00000025351	134.591	52.713	102.196	66.8927	44.701	30.3426	24.1517	44.3671	59.9414	41.8497	66.259	38.4555	33.755	49.136	62.6612	52.0363	37.5303	59.3647	Cd63	10	128900989	128912822	+	3682	protein_coding	CD63 antigen [Source:MGI Symbol;Acc:MGI:99529]	-
ENSMUSG00000053931	162.72	56.1411	99.8435	48.6046	63.105	65.7059	61.4354	68.5893	33.5628	41.8805	46.7775	24.0093	34.3011	38.7324	38.2176	32.4769	47.407	36.845	Cnn3	3	121426497	121458207	+	3037	protein_coding	calponin 3, acidic [Source:MGI Symbol;Acc:MGI:1919244]	-
ENSMUSG00000084106	57.5011	57.397	85.6159	26.2529	61.2854	88.2796	88.1457	65.8057	20.8531	35.4082	60.7462	65.0251	48.2611	40.9078	31.724	45.0644	86.3924	32.5631	Gm6136	1	86908793	86909683	-	891	processed_pseudogene	predicted pseudogene 6136 [Source:MGI Symbol;Acc:MGI:3646897]	-
ENSMUSG00000073676	43.2128	64.7814	50.376	34.8188	70.2228	58.8834	58.5445	49.1835	57.7839	78.1789	64.4356	62.123	56.087	58.3127	51.9714	45.1143	48.7129	44.2053	Hspe1	1	55088132	55091307	+	1474	protein_coding	heat shock protein 1 (chaperonin 10) [Source:MGI Symbol;Acc:MGI:104680]	-
ENSMUSG00000037266	3.81305	35.5559	5.13308	99.2698	30.5321	20.8257	16.2131	36.1753	97.5819	19.2869	44.9007	91.7678	78.468	78.4205	107.942	92.7465	28.7216	106.662	Rsrp1	4	134923592	134927671	+	3349	protein_coding	arginine/serine rich protein 1 [Source:MGI Symbol;Acc:MGI:106498]	-
ENSMUSG00000025337	172.925	53.513	102.057	40.8063	56.9516	63.1495	62.1374	61.1994	35.7029	33.7319	54.9493	23.2555	30.4306	31.0653	39.4112	31.9385	62.8224	37.302	Sbds	5	130245731	130255530	-	2033	protein_coding	SBDS ribosome maturation factor [Source:MGI Symbol;Acc:MGI:1913961]	-
ENSMUSG00000036199	35.7887	62.9037	31.3002	55.5426	61.3408	52.8608	42.9606	49.904	47.3328	60.9232	73.6155	64.5475	60.9289	52.2854	58.4928	63.9996	68.0289	46.1242	Ndufa13	8	69894180	69902558	-	1251	protein_coding	NADH:ubiquinone oxidoreductase subunit A13 [Source:MGI Symbol;Acc:MGI:1914434]	-
ENSMUSG00000029390	115.376	53.5067	78.3268	40.9358	48.4189	40.02	50.0451	52.3805	60.0237	47.3759	55.8071	38.4092	59.5302	45.8937	53.2973	56.0898	38.1619	53.6179	Tmed2	5	124540695	124550506	+	2527	protein_coding	transmembrane p24 trafficking protein 2 [Source:MGI Symbol;Acc:MGI:1929269]	-
ENSMUSG00000068798	155.507	69.0203	84.8984	46.6737	60.8721	63.9596	69.1245	68.0475	28.2083	42.1006	51.2615	25.5999	29.4237	37.2406	38.9931	22.8714	59.7144	31.4492	Rap1a	3	105727267	105801336	-	2607	protein_coding	RAS-related protein 1a [Source:MGI Symbol;Acc:MGI:97852]	-
ENSMUSG00000025825	116.239	57.5846	76.0937	35.6876	62.0474	56.8627	67.0294	54.5804	31.8803	65.1668	58.4979	31.2642	58.9971	39.4395	39.5612	35.5748	63.2785	34.551	Iscu	5	113772748	113778288	+	2176	protein_coding	iron-sulfur cluster assembly enzyme [Source:MGI Symbol;Acc:MGI:1913633]	-
ENSMUSG00000000903	10.5674	28.2298	3.61336	12.9389	25.9899	12.179	7.2563	18.1951	68.1242	26.0957	47.4248	66.2724	127.489	118.114	103.361	144.721	68.1041	95.2563	Vpreb3	10	75943057	75949657	+	859	protein_coding	pre-B lymphocyte gene 3 [Source:MGI Symbol;Acc:MGI:98938]	-
ENSMUSG00000005547	6.30855	2.04824	1.03658	1.57693	1.91148	2.80372	2.87319	3.7059	11.1408	7.12883	7.40417	624.684	49.8506	32.5119	47.1134	92.0473	22.4577	67.1493	Cyp2a5	7	26835305	26843548	+	2073	protein_coding	cytochrome P450, family 2, subfamily a, polypeptide 5 [Source:MGI Symbol;Acc:MGI:88597]	-
ENSMUSG00000027404	66.1823	58.1605	72.3166	47.5898	60.5997	65.4287	62.8082	52.195	31.1526	68.0653	45.5545	34.7964	64.8281	57.819	44.108	49.8542	52.2312	49.4728	Snrpb	2	130171414	130179403	-	1976	protein_coding	small nuclear ribonucleoprotein B [Source:MGI Symbol;Acc:MGI:98342]	-
ENSMUSG00000018286	88.5978	54.3855	65.8757	42.1233	49.7688	41.0518	48.4653	52.5004	52.6411	51.1797	57.2709	49.2171	57.4631	84.3958	29.3511	61.5448	49.2775	45.6256	Psmb6	11	70525367	70527858	+	1872	protein_coding	proteasome (prosome, macropain) subunit, beta type 6 [Source:MGI Symbol;Acc:MGI:104880]	-
ENSMUSG00000028609	140.667	49.261	122.481	37.9257	57.2348	58.0372	55.5857	55.9632	40.2543	42.6975	56.3535	28.734	35.0382	47.3361	42.6139	38.6005	33.1095	37.6801	Magoh	4	107879755	107887424	+	770	protein_coding	mago homolog, exon junction complex core component [Source:MGI Symbol;Acc:MGI:1330312]	-
ENSMUSG00000004837	108.719	95.2502	137.357	42.5005	74.3849	73.3311	52.0685	69.4404	16.5124	40.84	56.0611	30.7819	23.2476	25.6138	24.592	19.8049	64.0877	24.1361	Grap	11	61653265	61672784	+	1793	protein_coding	GRB2-related adaptor protein [Source:MGI Symbol;Acc:MGI:1918770]	-
ENSMUSG00000020911	19.491	42.5744	16.4751	46.5821	34.8032	34.5349	21.5052	21.1831	76.0579	25.5111	31.4175	114.42	81.1707	97.2087	83.1489	107.415	51.389	73.5689	Krt19	11	100140810	100148665	-	1855	protein_coding	keratin 19 [Source:MGI Symbol;Acc:MGI:96693]	-
ENSMUSG00000039349	47.3476	93.8892	63.7217	41.2765	92.8252	104.901	95.1575	65.405	17.0499	61.8773	51.4854	12.6245	34.3237	37.4259	19.2203	21.116	92.2388	26.0207	C130074G19Rik	1	184871926	184883218	-	3035	protein_coding	RIKEN cDNA C130074G19 gene [Source:MGI Symbol;Acc:MGI:2444831]	-
ENSMUSG00000093818	280.558	22.2013	266.849	0	11.3702	0	260.733	0	51.0724	0	74.6737	0	0	7.79654	0	0	0	2.39703	Ighd3-1	12	113525313	113525329	-	17	IG_D_gene	immunoglobulin heavy diversity 3-1 [Source:MGI Symbol;Acc:MGI:4439891]	-
ENSMUSG00000002477	114.701	53.4343	82.5818	45.5651	48.4965	59.1009	42.5308	61.0839	47.6126	41.4618	74.8683	37.3837	62.5612	38.2421	53.1415	35.8708	40.6122	37.6337	Snrpd1	18	10617796	10628230	+	837	protein_coding	small nuclear ribonucleoprotein D1 [Source:MGI Symbol;Acc:MGI:98344]	-
ENSMUSG00000091537	46.4167	51.9337	84.8572	38.5402	74.3161	58.2588	56.5678	61.5324	38.7158	84.4279	68.2748	51.9015	52.3104	34.0374	35.6332	42.1001	57.457	36.9415	Tma7	9	109074568	109082587	-	1359	protein_coding	translational machinery associated 7 [Source:MGI Symbol;Acc:MGI:1913417]	-
ENSMUSG00000000982	579.666	0.985437	375.127	2.27605	1.38787	2.19197	2.35077	0	0.56673	0	4.51977	0.421665	0	0	0.279977	0.39353	1.12549	1.17035	Ccl3	11	83647844	83649355	-	766	protein_coding	chemokine (C-C motif) ligand 3 [Source:MGI Symbol;Acc:MGI:98260]	-
ENSMUSG00000007891	38.7417	46.1945	51.2353	71.964	37.1211	34.226	38.7676	37.3718	58.2759	56.7847	65.63	78.0527	78.0586	56.7711	49.4786	74.0852	35.1514	64.2876	Ctsd	7	142375911	142388038	-	2351	protein_coding	cathepsin D [Source:MGI Symbol;Acc:MGI:88562]	-
ENSMUSG00000083394	76.1308	68.3736	51.41	42.2628	53.2256	72.7349	73.9892	54.2979	28.7613	58.0988	74.7861	36.5293	51.8374	36.9084	35.3441	42.1897	65.2779	49.7769	Gm11703	11	115724326	115724808	-	483	processed_pseudogene	predicted gene 11703 [Source:MGI Symbol;Acc:MGI:3649808]	-
ENSMUSG00000087412	50.1975	66.0155	40.9182	26.9099	82.3032	71.5008	74.2334	81.6461	33.3384	57.3043	67.1495	24.6336	112.734	15.5334	18.6928	26.4873	106.188	15.8391	Gm15501	7	93178983	93184176	-	849	transcribed_processed_pseudogene	predicted pseudogene 15501 [Source:MGI Symbol;Acc:MGI:3704296]	-
ENSMUSG00000031996	36.8989	56.7579	18.0645	82.4863	45.1894	36.7578	31.0273	46.3983	86.5866	49.3474	71.7965	42.8759	49.5349	62.864	78.0752	68.5907	33.6884	73.5435	Aplp2	9	31149557	31211815	-	5875	protein_coding	amyloid beta (A4) precursor-like protein 2 [Source:MGI Symbol;Acc:MGI:88047]	-
ENSMUSG00000061315	54.3069	67.4978	45.5415	39.3696	61.5385	59.5398	64.2398	58.4185	43.89	55.6576	79.9778	46.2304	55.1382	41.934	48.7039	37.4402	65.4445	41.1029	Naca	10	128035575	128048637	+	6805	protein_coding	nascent polypeptide-associated complex alpha polypeptide [Source:MGI Symbol;Acc:MGI:106095]	-
ENSMUSG00000000058	35.6149	86.7449	26.1311	66.022	86.5906	65.915	90.834	103.977	29.939	42.2209	68.793	18.9463	39.6379	34.2381	36.2817	29.4665	68.3571	34.5424	Cav2	6	17281185	17289115	+	3335	protein_coding	caveolin 2 [Source:MGI Symbol;Acc:MGI:107571]	-
ENSMUSG00000028788	94.5201	66.9349	80.1866	39.4504	63.8569	77.2527	62.6275	52.8161	30.8056	45.1438	53.3124	33.9083	46.6492	48.9345	36.1602	31.7353	61.0318	36.6811	Ptp4a2	4	129811219	129850003	+	4377	protein_coding	protein tyrosine phosphatase 4a2 [Source:MGI Symbol;Acc:MGI:1277117]	-
ENSMUSG00000028603	40.4321	71.9468	29.6905	51.7885	58.9382	63.3163	49.8621	64.2593	42.6876	49.4127	72.3354	30.3679	60.4222	54.9142	55.5949	47.7907	66.4673	47.9903	Scp2	4	108043839	108144998	-	3478	protein_coding	sterol carrier protein 2, liver [Source:MGI Symbol;Acc:MGI:98254]	-
ENSMUSG00000049422	12.6991	40.2584	11.9001	37.5672	32.461	31.5719	33.1556	21.2487	65.9304	28.8867	52.9763	47.9623	82.0381	119.582	100.11	117.898	52.6269	68.3558	Chchd10	10	75933130	75937747	+	1575	protein_coding	coiled-coil-helix-coiled-coil-helix domain containing 10 [Source:MGI Symbol;Acc:MGI:2143558]	-
ENSMUSG00000025393	62.1663	49.7944	57.2246	40.0595	50.7753	53.925	59.1719	56.8954	39.262	39.9732	39.7393	83.8839	53.9689	53.5076	35.8567	75.4001	55.0256	48.559	Atp5b	10	128083273	128090391	+	4237	protein_coding	ATP synthase, H+ transporting mitochondrial F1 complex, beta subunit [Source:MGI Symbol;Acc:MGI:107801]	-
ENSMUSG00000029621	48.9673	62.8915	39.7158	41.4582	59.1099	58.5663	69.5001	58.7537	38.0168	80.2738	52.9594	28.4682	48.6329	54.7565	41.9567	52.6088	64.1473	53.7031	Arpc1a	5	145083830	145108761	+	2567	protein_coding	actin related protein 2/3 complex, subunit 1A [Source:MGI Symbol;Acc:MGI:1928896]	-
ENSMUSG00000037058	35.0296	54.5023	42.0762	40.5545	67.3649	52.2374	57.313	48.2197	48.7815	25.3623	58.1782	41.4312	61.2739	62.9202	60.9322	77.6902	65.4886	52.5551	Paip2	18	35598617	35617186	+	2789	protein_coding	polyadenylate-binding protein-interacting protein 2 [Source:MGI Symbol;Acc:MGI:1915119]	-
ENSMUSG00000096210	31.4447	62.3068	36.6563	66.3869	63.9607	75.1692	68.0777	66.9896	37.4332	79.2656	71.1522	25.1284	52.7847	43.9869	32.6233	38.0509	52.8603	47.0554	H1f0	15	79028450	79030504	+	2055	protein_coding	H1 histone family, member 0 [Source:MGI Symbol;Acc:MGI:95893]	-
ENSMUSG00000018217	38.7577	72.5504	32.8624	130.274	56.2061	58.9276	61.3724	85.9018	51.7102	49.4469	73.6845	33.8741	33.9414	26.0972	37.6083	20.4121	35.4729	50.9803	Pmp22	11	63128982	63159547	+	2354	protein_coding	peripheral myelin protein 22 [Source:MGI Symbol;Acc:MGI:97631]	-
ENSMUSG00000024208	40.4396	71.8094	43.2164	38.6653	68.2414	49.225	55.9354	56.0199	51.8656	100.976	64.2516	37.4802	45.7401	44.3387	59.1885	47.2514	37.375	37.0495	Uqcc2	17	27122663	27133916	-	837	protein_coding	ubiquinol-cytochrome c reductase complex assembly factor 2 [Source:MGI Symbol;Acc:MGI:1914517]	-
ENSMUSG00000020496	28.1816	74.3613	37.7924	61.4621	66.2492	60.2383	69.5061	57.041	39.6918	85.7065	67.0283	41.721	52.7375	46.9912	41.3519	35.8825	42.9073	37.5925	Rnf187	11	58932288	58938916	-	1949	protein_coding	ring finger protein 187 [Source:MGI Symbol;Acc:MGI:1914224]	-
ENSMUSG00000073616	44.0317	64.6452	45.076	40.95	75.628	58.7629	54.4264	51.3086	46.3944	77.2074	73.2924	34.2604	43.4457	47.9235	49.445	40.2998	60.6356	38.0039	Cops9	1	92637145	92641985	-	1499	protein_coding	COP9 signalosome subunit 9 [Source:MGI Symbol;Acc:MGI:1914165]	-
ENSMUSG00000021546	101.65	56.7797	81.0697	43.2987	53.749	40.5491	49.5062	54.776	41.5317	41.704	55.4179	37.6208	54.8004	45.1882	48.0798	45.7248	44.552	46.7807	Hnrnpk	13	58391142	58403343	-	6466	protein_coding	heterogeneous nuclear ribonucleoprotein K [Source:MGI Symbol;Acc:MGI:99894]	-
ENSMUSG00000061613	173.915	48.1465	108.226	38.3729	36.0192	40.8425	41.0993	35.8106	35.8346	18.0707	41.8253	35.8562	35.3188	46.1989	48.7054	54.8418	53.3613	46.0211	U2af1	17	31647082	31658754	-	974	protein_coding	U2 small nuclear ribonucleoprotein auxiliary factor (U2AF) 1 [Source:MGI Symbol;Acc:MGI:98884]	-
ENSMUSG00000031848	32.4606	52.4501	39.2182	46.8546	49.813	59.4773	63.9196	40.8336	36.3854	67.826	61.4825	47.3758	64.4783	58.6092	57.1486	59.4176	46.393	53.1943	Lsm4	8	70673248	70678752	+	1038	protein_coding	LSM4 homolog, U6 small nuclear RNA and mRNA degradation associated [Source:MGI Symbol;Acc:MGI:1354692]	-
ENSMUSG00000104960	55.9143	87.8292	53.462	32.4044	82.4838	49.6645	42.8697	54.6586	35.0142	61.5128	68.3229	35.9725	64.1522	40.8655	37.2606	28.4835	64.2516	37.1189	Snhg8	3	123507552	123508404	-	853	processed_transcript	small nucleolar RNA host gene 8 [Source:MGI Symbol;Acc:MGI:1917145]	-
ENSMUSG00000029372	20.315	22.9137	24.4712	28.8093	76.2999	31.6037	71.8792	40.6045	20.3629	31.4306	31.1156	16.366	108.613	81.3237	60.4375	32.1206	103.26	129.022	Ppbp	5	90768518	90770063	+	1083	protein_coding	pro-platelet basic protein [Source:MGI Symbol;Acc:MGI:1888712]	-
ENSMUSG00000050335	89.431	43.6229	111.541	55.949	36.0474	34.0621	47.2649	35.8343	27.9909	78.2863	40.8078	61.3657	54.3126	47.3667	48.2944	34.6223	45.9368	36.4509	Lgals3	14	47367751	47386160	+	1858	protein_coding	lectin, galactose binding, soluble 3 [Source:MGI Symbol;Acc:MGI:96778]	-
ENSMUSG00000002944	71.8701	74.4068	33.0872	73.5342	55.1073	42.453	65.3604	82.7191	41.767	40.1932	60.8206	68.1417	39.8748	32.5076	35.6162	31.5215	33.3461	46.4818	Cd36	5	17781690	17888801	-	3590	protein_coding	CD36 molecule [Source:MGI Symbol;Acc:MGI:107899]	-
ENSMUSG00000046434	95.4941	45.5169	81.1389	34.3405	48.5531	45.4285	54.9138	56.5159	31.7222	25.6994	41.5794	54.7546	51.6925	45.9669	44.7153	51.9711	73.8263	44.8853	Hnrnpa1	15	103240432	103246692	+	3153	protein_coding	heterogeneous nuclear ribonucleoprotein A1 [Source:MGI Symbol;Acc:MGI:104820]	-
ENSMUSG00000020612	65.3018	70.1825	65.6161	45.9551	58.9586	62.7108	46.9943	63.2689	35.6857	49.7253	55.3387	34.927	52.7111	48.9552	40.3115	37.9369	52.9584	40.6741	Prkar1a	11	109649405	109669656	+	4321	protein_coding	protein kinase, cAMP dependent regulatory, type I, alpha [Source:MGI Symbol;Acc:MGI:104878]	-
ENSMUSG00000038462	69.195	50.2584	52.2889	39.653	52.9677	48.2328	39.0239	48.0708	44.8448	35.4507	52.4105	58.6511	58.8227	58.2967	57.3682	70.6834	40.8428	50.9146	Uqcrfs1	13	30540308	30545362	-	1363	protein_coding	ubiquinol-cytochrome c reductase, Rieske iron-sulfur polypeptide 1 [Source:MGI Symbol;Acc:MGI:1913944]	-
ENSMUSG00000020803	70.4198	51.525	54.1898	26.6105	53.7979	77.9435	70.0943	57.2233	34.7554	72.6136	54.5645	30.1894	62.0746	57.1108	30.8735	33.8328	61.5805	27.823	Txndc17	11	72207547	72210015	+	1324	protein_coding	thioredoxin domain containing 17 [Source:MGI Symbol;Acc:MGI:1289248]	-
ENSMUSG00000009630	103.268	40.5299	74.9273	39.734	69.3434	55.0394	60.9125	53.1979	33.8663	45.4393	44.3865	29.3807	49.9513	44.9774	42.7756	38.8245	57.5142	38.2253	Ppp2cb	8	33599625	33619441	+	1469	protein_coding	protein phosphatase 2 (formerly 2A), catalytic subunit, beta isoform [Source:MGI Symbol;Acc:MGI:1321161]	-
ENSMUSG00000022884	20.0893	48.9454	16.5495	48.5902	49.5906	54.8764	63.2631	56.0452	66.1664	38.2608	49.2924	58.6254	64.6525	56.3511	60.329	54.2464	56.8737	59.0174	Eif4a2	16	23107444	23114136	+	5338	protein_coding	eukaryotic translation initiation factor 4A2 [Source:MGI Symbol;Acc:MGI:106906]	-
ENSMUSG00000019158	37.4617	78.4337	51.3752	61.6197	66.1093	43.7352	55.5313	40.4012	24.8768	62.2436	70.8374	36.3964	67.4708	52.7613	33.2744	40.8981	55.792	42.0418	Tmem160	7	16452779	16455494	+	883	protein_coding	transmembrane protein 160 [Source:MGI Symbol;Acc:MGI:1916344]	-
ENSMUSG00000031451	22.5226	50.1403	11.2446	72.9717	51.5473	47.6992	34.0307	47.3743	49.7495	33.952	44.3865	29.8689	100.495	60.0544	59.2885	73.5391	48.8197	82.6027	Gas6	8	13465374	13494490	-	2548	protein_coding	growth arrest specific 6 [Source:MGI Symbol;Acc:MGI:95660]	-
ENSMUSG00000020577	31.7783	94.7369	25.671	97.6757	71.4497	59.4627	81.7986	77.2023	42.6394	60.7402	51.7782	33.4223	31.3419	39.6177	31.5192	22.6144	26.4343	40.2554	Tspan13	12	36014557	36042500	-	2474	protein_coding	tetraspanin 13 [Source:MGI Symbol;Acc:MGI:1913359]	-
ENSMUSG00000087260	57.7824	49.099	50.777	45.6078	55.6483	62.5334	51.2379	61.9317	41.7418	66.1177	68.799	38.3649	57.8227	41.5315	44.3966	42.0112	43.7472	37.9377	Lamtor5	3	107278858	107284082	+	884	protein_coding	late endosomal/lysosomal adaptor, MAPK and MTOR activator 5 [Source:MGI Symbol;Acc:MGI:1915826]	-
ENSMUSG00000005610	90.8507	53.5077	87.4153	36.6077	59.6744	52.4966	57.6486	58.4486	38.8338	39.4942	49.37	40.0726	46.849	41.6684	39.9643	41.6198	45.5281	36.9256	Eif4g2	7	111067750	111083030	-	10166	protein_coding	eukaryotic translation initiation factor 4, gamma 2 [Source:MGI Symbol;Acc:MGI:109207]	-
ENSMUSG00000006932	58.1992	56.1008	85.856	32.9989	66.2118	84.5546	70.6713	63.8459	25.0168	26.0646	36.2529	32.536	26.7031	55.2297	32.4832	50.3839	75.2914	36.0012	Ctnnb1	9	120929216	120960507	+	5192	protein_coding	catenin (cadherin associated protein), beta 1 [Source:MGI Symbol;Acc:MGI:88276]	-
ENSMUSG00000072692	51.353	56.9647	56.8324	31.7334	63.8741	41.5641	59.6792	56.1285	36.0223	94.2839	56.6281	57.7161	57.8273	36.2197	36.9035	38.7227	48.1507	33.4342	Rpl37rt	5	115102923	115110268	-	752	transcribed_processed_pseudogene	ribosomal protein L37, retrotransposed [Source:MGI Symbol;Acc:MGI:3651519]	-
ENSMUSG00000029048	36.3856	47.906	55.4781	46.6538	40.811	58.8117	37.4157	54.7145	55.808	44.1202	51.595	43.0453	62.168	54.4705	65.2844	61.8176	38.2247	56.3396	Rer1	4	155074110	155086382	-	1814	protein_coding	retention in endoplasmic reticulum sorting receptor 1 [Source:MGI Symbol;Acc:MGI:1915080]	-
ENSMUSG00000042485	15.4352	52.7506	6.0849	62.476	58.8011	49.6359	58.0506	60.8688	55.5639	55.0799	71.9879	58.6017	30.3572	47.5582	73.9513	51.5577	51.0181	51.2337	Mustn1	14	30879200	30881610	+	1236	protein_coding	musculoskeletal, embryonic nuclear protein 1 [Source:MGI Symbol;Acc:MGI:1913425]	-
ENSMUSG00000047260	54.2568	46.8777	25.1415	36.9636	39.6831	28.7525	54.6227	35.321	59.9478	67.005	66.1437	30.0454	55.2886	63.601	72.4776	77.4168	39.69	56.9918	Emc6	11	73175519	73177037	-	1415	protein_coding	ER membrane protein complex subunit 6 [Source:MGI Symbol;Acc:MGI:1913298]	-
ENSMUSG00000030357	16.0735	66.3021	10.5926	42.5857	49.1013	53.3729	51.8377	36.0161	76.3235	69.8045	49.2174	42.9746	51.564	79.0505	63.9166	71.3328	38.4685	41.0412	Fkbp4	6	128429735	128438677	-	2795	protein_coding	FK506 binding protein 4 [Source:MGI Symbol;Acc:MGI:95543]	-
ENSMUSG00000064356	168.184	59.666	57.3491	12.8195	93.3302	62.0464	66.5413	82.2426	2.12802	61.8602	52.611	5.14576	31.2781	8.44625	2.9436	27.7801	106.257	8.38962	mt-Atp8	MT	7766	7969	+	204	protein_coding	mitochondrially encoded ATP synthase 8 [Source:MGI Symbol;Acc:MGI:99926]	-
ENSMUSG00000021807	56.368	57.387	35.8078	38.6969	50.1539	58.9823	52.9763	54.3013	41.6769	58.2496	62.0443	40.9402	57.8745	51.4826	48.9913	42.393	58.0972	42.1241	Rtraf	14	19811351	19823824	-	1927	protein_coding	RNA transcription, translation and transport factor [Source:MGI Symbol;Acc:MGI:1915295]	-
ENSMUSG00000015312	252.712	32.8968	185.944	40.6421	27.1875	21.7837	30.4227	28.8414	51.5802	20.6904	24.3301	21.4195	30.2477	24.815	21.2977	33.3504	34.1037	25.2601	Gadd45b	10	80930073	80932204	+	1589	protein_coding	growth arrest and DNA-damage-inducible 45 beta [Source:MGI Symbol;Acc:MGI:107776]	-
ENSMUSG00000014313	56.6764	61.1049	51.9086	40.4867	50.9108	60.9761	49.5888	43.6686	47.0504	51.8573	64.901	40.6235	44.5651	49.1966	50.3237	49.6407	50.0309	41.1723	Cox6c	15	35925886	35938246	-	3567	protein_coding	cytochrome c oxidase subunit 6C [Source:MGI Symbol;Acc:MGI:104614]	-
ENSMUSG00000064215	42.6849	43.3508	33.6086	55.2133	32.8743	45.2537	64.2058	53.0899	29.7696	49.1233	46.7283	71.2539	90.9616	53.3056	45.4361	41.3432	57.4247	39.1663	Ifi27	12	103434211	103440239	+	1467	protein_coding	interferon, alpha-inducible protein 27 [Source:MGI Symbol;Acc:MGI:1277180]	-
ENSMUSG00000068267	51.6732	60.0778	85.1247	36.2178	59.8156	79.25	61.8865	53.1334	19.067	61.7489	43.8614	22.6414	21.1929	50.8897	29.7332	34.1916	90.7449	32.0592	Cenpb	2	131175182	131180067	-	4886	protein_coding	centromere protein B [Source:MGI Symbol;Acc:MGI:88376]	-
ENSMUSG00000036880	15.6393	45.4651	6.54028	34.8355	45.9948	50.0433	48.6401	47.8524	47.0506	62.1438	52.4844	61.6143	74.5747	64.0834	47.8187	80.4647	46.5817	60.0619	Acaa2	18	74779197	74806207	+	1515	protein_coding	acetyl-Coenzyme A acyltransferase 2 (mitochondrial 3-oxoacyl-Coenzyme A thiolase) [Source:MGI Symbol;Acc:MGI:1098623]	-
ENSMUSG00000064342	91.4207	23.247	60.555	2.63202	203.098	84.2334	112.418	39.6722	13.8414	0	70.2464	6.43651	25.1289	41.299	31.0815	23.5913	41.0536	21.2607	mt-Ti	MT	3706	3774	+	69	Mt_tRNA	mitochondrially encoded tRNA isoleucine [Source:MGI Symbol;Acc:MGI:102484]	-
ENSMUSG00000056612	52.4009	44.457	61.9632	39.4442	60.3646	49.3302	17.1824	41.8933	35.9007	88.895	73.7134	44.7238	89.8079	47.0168	32.5777	37.9183	38.5967	34.0984	Ppp1r14b	19	6975048	6977324	+	919	protein_coding	protein phosphatase 1, regulatory inhibitor subunit 14B [Source:MGI Symbol;Acc:MGI:107682]	-
ENSMUSG00000082884	62.7485	59.9435	45.6452	10.6829	55.5244	96.7418	68.7141	52.4621	13.2788	191.767	45.0305	6.17492	16.047	5.71746	16.1477	12.767	123.402	6.31219	Gm13339	2	22590024	22590533	-	510	unprocessed_pseudogene	predicted gene 13339 [Source:MGI Symbol;Acc:MGI:3650221]	-
ENSMUSG00000002204	112.325	120.747	55.9649	97.1679	48.4322	40.5925	39.0549	57.0979	21.3141	77.2799	105.556	10.2454	18.4862	9.7911	22.4621	13.1683	11.066	27.7281	Napsa	7	44572380	44586862	+	2660	protein_coding	napsin A aspartic peptidase [Source:MGI Symbol;Acc:MGI:109365]	-
ENSMUSG00000028070	24.7387	40.0076	9.46624	45.4024	31.3995	36.5568	25.7808	34.9126	67.7946	26.1504	29.9951	45.8437	98.9925	78.1671	69.157	117.988	39.1999	66.779	Naxe	3	88056520	88058495	-	908	protein_coding	NAD(P)HX epimerase [Source:MGI Symbol;Acc:MGI:2180167]	-
ENSMUSG00000020077	234.074	28.2723	219.787	39.1006	35.8243	19.703	36.3948	35.4658	14.5496	25.2547	24.6996	37.5799	21.5711	16.0244	26.3097	9.22452	32.2484	32.0281	Srgn	10	62493833	62527451	-	2196	protein_coding	serglycin [Source:MGI Symbol;Acc:MGI:97756]	-
ENSMUSG00000021390	51.0849	47.9867	22.8897	51.2414	47.9089	58.0355	53.8728	81.833	34.6818	27.6959	47.808	39.8867	100.871	40.3667	42.2907	40.1769	59.7566	37.5099	Ogn	13	49608046	49624501	+	2566	protein_coding	osteoglycin [Source:MGI Symbol;Acc:MGI:109278]	-
ENSMUSG00000020402	42.4568	48.9064	41.2362	36.6546	49.2454	47.0292	47.317	48.5327	50.7351	50.1306	51.8441	38.3711	57.8672	56.1023	52.355	61.8075	50.6276	52.1968	Vdac1	11	52360860	52389397	+	2620	protein_coding	voltage-dependent anion channel 1 [Source:MGI Symbol;Acc:MGI:106919]	-
ENSMUSG00000001270	3.02926	64.5659	0.989678	46.5849	72.1761	51.9308	58.0852	54.6286	56.8623	51.4484	75.7008	45.7159	60.5397	45.2105	54.7156	57.8106	38.5436	44.7612	Ckb	12	111669361	111672338	-	2895	protein_coding	creatine kinase, brain [Source:MGI Symbol;Acc:MGI:88407]	-
ENSMUSG00000076432	48.4533	49.7517	38.4543	40.297	56.485	64.9798	61.4514	68.1669	39.3696	59.0734	49.8416	31.0096	47.2871	47.8031	46.7179	43.508	51.4612	38.6063	Ywhaq	12	21390071	21417637	-	3061	protein_coding	tyrosine 3-monooxygenase/tryptophan 5-monooxygenase activation protein theta [Source:MGI Symbol;Acc:MGI:891963]	-
ENSMUSG00000038539	19.2221	78.5902	39.6535	43.5571	50.3357	104.661	70.4736	64.2442	17.9919	63.319	58.3104	14.4035	38.9409	53.9342	42.1177	38.5389	54.3194	29.0338	Atf5	7	44812256	44816658	-	1993	protein_coding	activating transcription factor 5 [Source:MGI Symbol;Acc:MGI:2141857]	TF_bZIP
ENSMUSG00000004655	46.209	40.5151	26.8116	87.1753	30.6826	30.3843	44.08	50.7899	27.63	26.0414	29.9604	75.2621	153.919	53.7329	41.7005	20.3564	24.1915	68.3762	Aqp1	6	55336432	55348555	+	2627	protein_coding	aquaporin 1 [Source:MGI Symbol;Acc:MGI:103201]	-
ENSMUSG00000069662	159.67	42.0964	152.026	37.4076	52.0239	39.5642	55.091	54.8401	21.2768	39.8707	51.63	19.4292	29.4523	26.6523	23.5548	17.902	29.9688	24.341	Marcks	10	37133375	37138920	-	4048	protein_coding	myristoylated alanine rich protein kinase C substrate [Source:MGI Symbol;Acc:MGI:96907]	-
ENSMUSG00000028822	26.6519	55.8704	20.022	73.5304	55.2483	34.0692	37.628	54.3721	51.4785	31.6402	51.2506	61.42	58.1606	47.6417	56.4694	58.1051	44.1246	58.6537	Tmem50a	4	134897849	134915024	-	1270	protein_coding	transmembrane protein 50A [Source:MGI Symbol;Acc:MGI:1919067]	-
ENSMUSG00000031776	63.3647	63.3415	63.9931	38.1497	47.323	61.721	73.1626	62.1774	31.8227	62.1634	54.737	21.167	42.4997	42.0045	33.8302	33.0491	48.3062	33.5072	Arl2bp	8	94666600	94674425	+	2802	protein_coding	ADP-ribosylation factor-like 2 binding protein [Source:MGI Symbol;Acc:MGI:1349429]	-
ENSMUSG00000011958	31.1717	75.9214	40.254	43.2499	83.5552	75.8125	73.8477	57.4542	23.7978	48.6363	52.2411	22.4367	29.3081	44.9988	39.7267	28.5827	72.5063	32.2812	Bnip2	9	69989466	70008317	+	3455	protein_coding	BCL2/adenovirus E1B interacting protein 2 [Source:MGI Symbol;Acc:MGI:109327]	-
ENSMUSG00000040681	56.8893	45.3469	65.7127	32.7811	49.3584	62.4337	58.2699	50.7445	28.8152	41.3439	48.2615	33.7812	59.8601	46.2721	39.1904	48.5155	66.4557	39.6363	Hmgn1	16	96120618	96127729	-	3221	protein_coding	high mobility group nucleosomal binding domain 1 [Source:MGI Symbol;Acc:MGI:96120]	-
ENSMUSG00000019528	13.1931	59.0125	12.3251	50.6864	47.21	67.9401	93.8401	66.9804	22.0762	67.58	68.4354	15.9672	83.0259	48.5437	32.3706	28.0096	63.8924	31.4662	Gyg	3	20122084	20155317	-	2344	protein_coding	glycogenin [Source:MGI Symbol;Acc:MGI:1351614]	-
ENSMUSG00000013698	21.8369	65.152	30.9813	39.257	81.8279	91.3237	91.9485	79.0858	18.7093	63.3477	58.9428	16.773	41.5489	32.7319	27.8617	20.1587	67.2744	23.7152	Pea15a	1	172196728	172206804	-	3861	protein_coding	phosphoprotein enriched in astrocytes 15A [Source:MGI Symbol;Acc:MGI:104799]	-
ENSMUSG00000071532	67.3935	53.6294	35.967	29.4145	91.2772	81.1376	55.0507	74.7176	29.8686	40.8018	53.7569	29.8495	53.4989	32.7105	12.4645	41.3519	61.8436	26.8181	Gm10335	10	14523078	14523545	+	468	processed_pseudogene	predicted gene 10335 [Source:MGI Symbol;Acc:MGI:3641693]	-
ENSMUSG00000018965	56.2487	55.6365	39.6216	39.769	59.4106	55.7513	49.6322	50.8769	30.2909	54.483	52.2417	28.9773	62.9794	50.3327	48.0733	30.7865	61.3978	43.9687	Ywhah	5	33018816	33027966	+	3709	protein_coding	tyrosine 3-monooxygenase/tryptophan 5-monooxygenase activation protein, eta polypeptide [Source:MGI Symbol;Acc:MGI:109194]	-
ENSMUSG00000003072	27.93	51.044	39.752	43.1982	53.6368	50.5779	61.8574	40.8537	37.7374	44.9564	43.3366	73.7336	58.3841	50.9747	41.3796	64.823	41.9693	44.0679	Atp5d	10	80138632	80145818	+	1928	protein_coding	ATP synthase, H+ transporting, mitochondrial F1 complex, delta subunit [Source:MGI Symbol;Acc:MGI:1913293]	-
ENSMUSG00000075705	56.1361	45.3027	162.558	33.2325	39.642	41.581	39.3082	30.7445	24.0178	99.6538	44.951	41.6261	42.3964	32.1344	34.5049	29.9527	36.5175	35.7288	Msrb1	17	24736642	24742778	+	1258	protein_coding	methionine sulfoxide reductase B1 [Source:MGI Symbol;Acc:MGI:1351642]	-
ENSMUSG00000024164	40.4156	24.2539	29.0383	33.5393	32.5287	20.8692	14.1666	22.2173	46.1042	44.5866	37.4959	60.597	179.384	63.3584	69.4469	50.5591	41.4528	59.8448	C3	17	57203970	57228136	-	5143	protein_coding	complement component 3 [Source:MGI Symbol;Acc:MGI:88227]	-
ENSMUSG00000062353	85.0063	58.5952	43.064	27.0341	75.2431	62.2199	56.9238	43.7481	28.3463	49.6621	52.9597	50.7907	38.795	32.6814	36.1354	28.4927	70.8597	28.0967	Gm15772	5	3236431	3236868	+	438	processed_pseudogene	predicted gene 15772 [Source:MGI Symbol;Acc:MGI:3805541]	-
ENSMUSG00000038776	23.591	27.3873	5.14252	55.6191	25.7724	32.9849	21.9492	22.1889	78.3634	20.1809	24.5605	57.6009	71.3832	82.7193	73.2691	124.69	29.6218	91.3418	Ephx1	1	180976210	181020904	-	1950	protein_coding	epoxide hydrolase 1, microsomal [Source:MGI Symbol;Acc:MGI:95405]	-
ENSMUSG00000061518	69.8986	45.2455	82.4451	36.8941	49.6326	36.1349	48.8772	38.7819	35.9985	66.8577	55.9935	56.1223	37.3219	41.4661	35.6491	48.4362	41.2865	36.4358	Cox5b	1	36691449	36693681	+	1587	protein_coding	cytochrome c oxidase subunit 5B [Source:MGI Symbol;Acc:MGI:88475]	-
ENSMUSG00000053565	40.545	58.7187	29.9113	35.5411	67.0579	57.5418	58.6813	58.2247	40.998	63.2672	52.9545	41.5267	46.4001	36.6969	39.5857	37.8984	57.0156	38.5293	Eif3k	7	28971372	28981864	-	2698	protein_coding	eukaryotic translation initiation factor 3, subunit K [Source:MGI Symbol;Acc:MGI:1921080]	-
ENSMUSG00000091498	129.144	48.8933	79.5866	19.812	46.8589	18.0038	66.7389	26.4908	23.679	25.1584	23.4307	34.3795	51.4915	38.1558	40.0329	83.8562	52.2501	49.023	Mpc1-ps	12	110858565	110858894	-	330	processed_pseudogene	mitochondrial pyruvate carrier 1, pseudogene [Source:MGI Symbol;Acc:MGI:3781628]	-
ENSMUSG00000054428	36.8354	47.9308	27.4217	40.002	45.4728	40.9612	33.0666	40.3826	54.2267	49.203	57.1818	34.8828	68.4414	59.5561	62.5973	57.0673	43.8456	56.8402	Atpif1	4	132530555	132533659	-	1441	protein_coding	ATPase inhibitory factor 1 [Source:MGI Symbol;Acc:MGI:1196457]	-
ENSMUSG00000031231	45.3706	53.5511	47.4963	36.1723	51.5076	44.6839	40.5047	47.6427	42.0527	69.0717	47.4357	56.8036	49.4746	40.3956	43.4577	47.8238	51.2325	37.695	Cox7b	X	106015700	106022450	+	1214	protein_coding	cytochrome c oxidase subunit 7B [Source:MGI Symbol;Acc:MGI:1913392]	-
ENSMUSG00000020153	25.6125	53.8233	28.9069	51.0579	48.2107	45.6338	49.9878	51.0901	49.8298	46.4889	51.388	45.8971	48.2827	62.9917	59.3453	48.9539	40.3607	43.928	Ndufs7	10	80249121	80256794	+	1718	protein_coding	NADH:ubiquinone oxidoreductase core subunit S7 [Source:MGI Symbol;Acc:MGI:1922656]	-
ENSMUSG00000022283	67.6583	61.2013	64.3264	37.316	59.5691	50.5572	41.5544	46.5951	34.3044	60.2487	56.2731	41.3437	31.1041	33.6926	38.1179	29.158	64.6689	32.3816	Pabpc1	15	36595661	36609668	-	6540	protein_coding	poly(A) binding protein, cytoplasmic 1 [Source:MGI Symbol;Acc:MGI:1349722]	-
ENSMUSG00000001525	33.4808	61.9394	42.018	42.0644	58.9698	75.5459	61.2012	55.0995	32.2031	69.5725	55.9507	52.4613	38.7117	36.9299	33.5971	25.1158	43.719	30.2652	Tubb5	17	35833921	35838306	-	3327	protein_coding	tubulin, beta 5 class I [Source:MGI Symbol;Acc:MGI:107812]	-
ENSMUSG00000073639	72.6667	58.0682	70.771	34.5195	47.5739	46.0093	54.3748	57.7077	33.8906	36.3432	47.3993	25.688	56.0194	46.1574	41.3531	38.9994	45.0735	32.6249	Rab18	18	6765205	6790231	+	2257	protein_coding	RAB18, member RAS oncogene family [Source:MGI Symbol;Acc:MGI:102790]	-
ENSMUSG00000008393	143.788	60.6807	142.312	26.5869	48.188	56.1281	49.1926	43.2862	17.1641	58.7377	35.9782	11.9372	31.2563	30.631	17.6042	14.3655	37.362	18.3787	Carhsp1	16	8658580	8672155	-	2858	protein_coding	calcium regulated heat stable protein 1 [Source:MGI Symbol;Acc:MGI:1196368]	CSD
ENSMUSG00000059355	32.2333	54.545	23.0423	43.3679	45.7454	50.8614	56.2926	43.7659	50.6117	78.2718	43.6546	30.0361	56.1709	41.5236	48.9664	48.1843	37.9876	54.5436	Wdr83os	8	85080740	85082339	+	1031	protein_coding	WD repeat domain 83 opposite strand [Source:MGI Symbol;Acc:MGI:3041257]	-
ENSMUSG00000081559	37.2691	76.1877	87.0015	44.1428	27.013	78.8852	36.421	50.093	20.4924	48.473	76.9365	11.7863	25.2725	45.9641	15.5407	38.5699	72.1626	47.1615	Gm12411	4	45550017	45550499	+	483	processed_pseudogene	predicted gene 12411 [Source:MGI Symbol;Acc:MGI:3649918]	-
ENSMUSG00000025035	25.2681	38.4539	29.0462	25.8495	40.093	53.2658	67.7407	47.1592	37.4966	30.7043	54.7541	30.9439	57.9653	95.4554	33.7608	85.4458	50.9425	34.9495	Arl3	19	46531109	46573085	-	822	protein_coding	ADP-ribosylation factor-like 3 [Source:MGI Symbol;Acc:MGI:1929699]	-
ENSMUSG00000017466	17.4942	50.8106	26.934	69.3715	52.4163	66.2033	69.7551	72.6411	41.6733	29.8763	51.4227	34.1773	72.2576	36.9115	39.1823	29.1076	30.6322	46.6173	Timp2	11	118301069	118355740	-	3896	protein_coding	tissue inhibitor of metalloproteinase 2 [Source:MGI Symbol;Acc:MGI:98753]	-
ENSMUSG00000024885	6.40034	22.8969	7.06729	29.5806	22.5251	16.8077	11.6722	19.2146	59.9658	16.5603	20.7421	40.0084	88.4426	126.957	82.6966	148.937	40.134	75.7834	Aldh3b1	19	3913493	3929761	-	1875	protein_coding	aldehyde dehydrogenase 3 family, member B1 [Source:MGI Symbol;Acc:MGI:1914939]	-
ENSMUSG00000115049	33.2391	61.0536	9.19289	84.4144	51.4759	23.6214	29.0362	51.7538	54.5082	43.3317	51.8396	32.8177	40.7234	50.394	72.3896	44.6202	36.619	64.9814	Gm49172	15	95972739	95994129	-	935	processed_transcript	predicted gene, 49172 [Source:MGI Symbol;Acc:MGI:6118604]	-
ENSMUSG00000002379	33.5324	47.6098	40.6679	36.6213	48.5888	40.0957	29.9354	41.8063	48.5796	51.6992	58.6535	47.2144	79.5179	53.8297	43.4423	40.3582	50.4148	42.5035	Ndufa11	17	56717767	56722141	+	1092	protein_coding	NADH:ubiquinone oxidoreductase subunit A11 [Source:MGI Symbol;Acc:MGI:1917125]	-
ENSMUSG00000041247	103.838	92.528	51.0459	84.3651	48.5536	40.1021	64.2219	66.3059	19.5067	62.1929	86.1065	2.47829	23.6215	14.6917	21.4462	10.8685	20.5513	21.2612	Lamp3	16	19653378	19706375	-	3356	protein_coding	lysosomal-associated membrane protein 3 [Source:MGI Symbol;Acc:MGI:2441659]	-
ENSMUSG00000092086	105.127	41.4717	89.0139	31.0684	53.3845	51.3733	44.9913	42.0043	22.7883	28.0539	42.0177	37.0015	33.8564	46.7695	44.0958	41.9842	48.988	29.1649	Gm6793	8	112013433	112015036	-	1604	protein_coding	predicted gene 6793 [Source:MGI Symbol;Acc:MGI:3643578]	-
ENSMUSG00000068614	24.3428	12.8296	1.84456	44.0891	43.6044	40.3918	21.0597	28.4336	66.2173	37.9709	30.456	136.594	58.2538	30.6368	52.4624	103.847	39.4298	58.3792	Actc1	2	114047282	114053548	-	1618	protein_coding	actin, alpha, cardiac muscle 1 [Source:MGI Symbol;Acc:MGI:87905]	-
ENSMUSG00000029188	75.7456	75.8157	55.0819	100.575	37.4787	40.6823	41.6677	67.6934	23.5546	60.7145	92.6369	2.27927	26.4252	16.2867	26.5586	20.7457	25.0105	40.4976	Slc34a2	5	53038081	53071664	+	5013	protein_coding	solute carrier family 34 (sodium phosphate), member 2 [Source:MGI Symbol;Acc:MGI:1342284]	-
ENSMUSG00000029465	61.2744	46.9728	51.1751	37.9526	55.6015	51.3919	48.094	49.6502	33.3209	59.6971	58.8305	32.1154	51.251	37.7181	38.451	34.9902	44.4574	36.3973	Arpc3	5	122391878	122414184	+	2762	protein_coding	actin related protein 2/3 complex, subunit 3 [Source:MGI Symbol;Acc:MGI:1928375]	-
ENSMUSG00000060904	69.2312	53.6102	47.4194	35.2333	50.5874	54.2474	50.2254	56.7313	30.4925	37.2183	64.1084	25.7858	48.4818	45.8495	36.8994	35.3487	51.7286	35.3312	Arl1	10	88730858	88744094	+	2369	protein_coding	ADP-ribosylation factor-like 1 [Source:MGI Symbol;Acc:MGI:99436]	-
ENSMUSG00000028832	13.4483	66.6184	5.96278	52.2151	82.6172	81.1101	85.4726	48.7915	31.4858	88.8111	72.8935	15.3137	33.7758	36.5488	30.9308	20.7027	35.0515	25.9932	Stmn1	4	134468320	134473843	+	1922	protein_coding	stathmin 1 [Source:MGI Symbol;Acc:MGI:96739]	-
ENSMUSG00000017493	17.8034	45.9171	21.3024	45.8219	64.9563	101.636	66.4657	71.3659	47.4814	61.6279	68.3387	37.8693	32.4163	23.5158	37.5697	22.3489	32.9377	28.0061	Igfbp4	11	99041244	99054392	+	4416	protein_coding	insulin-like growth factor binding protein 4 [Source:MGI Symbol;Acc:MGI:96439]	-
ENSMUSG00000079197	47.2727	60.5502	62.9384	42.0461	38.3518	43.5652	37.2199	45.5529	36.57	46.5003	46.646	55.5034	54.1794	43.166	52.2539	25.633	54.5986	34.0966	Psme2	14	55587441	55591113	-	1764	protein_coding	proteasome (prosome, macropain) activator subunit 2 (PA28 beta) [Source:MGI Symbol;Acc:MGI:1096365]	-
ENSMUSG00000004096	97.2485	49.6102	76.1417	35.6977	42.6327	49.5749	54.8416	44.4042	29.5674	48.0909	53.4785	27.4988	33.7729	41.5931	37.077	32.351	41.1582	31.1264	Cwc15	9	14500617	14510577	+	1571	protein_coding	CWC15 spliceosome-associated protein [Source:MGI Symbol;Acc:MGI:1913320]	-
ENSMUSG00000003814	58.1228	32.1726	36.4772	50.6489	38.8599	50.0038	38.332	38.5711	38.8292	58.0583	50.2492	60.8981	50.2589	58.493	37.8734	59.0328	31.2606	37.5236	Calr	8	84841850	84846934	-	2880	protein_coding	calreticulin [Source:MGI Symbol;Acc:MGI:88252]	-
ENSMUSG00000037166	5.85254	43.1399	21.4831	57.5783	46.379	71.051	86.7363	57.2319	26.2311	65.8352	65.7647	16.6578	47.6409	40.6737	35.4561	45.2056	55.9495	36.2185	Ppp1r14a	7	29289308	29293801	+	1367	protein_coding	protein phosphatase 1, regulatory inhibitor subunit 14A [Source:MGI Symbol;Acc:MGI:1931139]	-
ENSMUSG00000000303	47.0241	40.1021	31.3979	42.1267	35.73	30.5811	20.6833	27.5487	76.7627	44.4337	52.3283	30.6736	46.7326	71.8776	73.8849	69.5681	28.4342	54.0507	Cdh1	8	106603351	106670246	+	4574	protein_coding	cadherin 1 [Source:MGI Symbol;Acc:MGI:88354]	-
ENSMUSG00000042079	92.2016	41.898	73.5007	32.8292	42.598	44.8471	45.3684	44.1948	37.4419	27.7379	35.2615	45.5422	35.486	53.0034	46.7073	49.2481	37.0251	38.6365	Hnrnpf	6	117900324	117925622	+	3047	protein_coding	heterogeneous nuclear ribonucleoprotein F [Source:MGI Symbol;Acc:MGI:2138741]	-
ENSMUSG00000021877	90.485	52.1928	62.5228	28.8317	43.8839	49.7202	45.9793	46.7124	41.5922	46.2237	51.6967	29.3928	43.4653	43.8309	37.7972	36.3942	38.5583	33.2398	Arf4	14	26638074	26665084	+	3603	protein_coding	ADP-ribosylation factor 4 [Source:MGI Symbol;Acc:MGI:99433]	-
ENSMUSG00000073982	90.7958	57.012	101.557	42.7166	52.475	50.5717	47.6022	37.2488	31.8555	56.362	35.3529	38.2704	39.2203	26.0882	29.5112	19.4877	37.2952	28.783	Rhog	7	102239123	102256054	-	1420	protein_coding	ras homolog family member G [Source:MGI Symbol;Acc:MGI:1928370]	-
ENSMUSG00000002102	68.8715	49.4037	67.3601	35.6671	45.5985	49.2455	54.3538	44.7102	34.8691	39.6166	46.9233	34.0868	45.4923	44.46	38.3021	42.0195	48.8486	31.6993	Psmc3	2	91054009	91066369	+	2607	protein_coding	proteasome (prosome, macropain) 26S subunit, ATPase 3 [Source:MGI Symbol;Acc:MGI:1098754]	-
ENSMUSG00000060032	40.7533	56.7885	48.7039	43.7013	53.8919	49.3071	56.6616	31.5401	32.2919	61.3943	57.1036	34.1342	55.1135	51.2502	35.0682	43.3315	34.0357	36.2985	H2afj	6	136808244	136810074	+	1831	protein_coding	H2A histone family, member J [Source:MGI Symbol;Acc:MGI:3606192]	-
ENSMUSG00000042745	79.3146	48.9673	91.1815	52.886	46.6569	43.8691	58.7493	66.5314	30.2384	41.3683	32.6317	19.9088	46.8152	36.7345	31.6886	16.4755	24.526	51.4639	Id1	2	152736251	152737410	+	1160	protein_coding	inhibitor of DNA binding 1 [Source:MGI Symbol;Acc:MGI:96396]	bHLH
ENSMUSG00000018340	40.9053	68.0455	33.2063	42.359	56.6685	71.7201	63.4898	64.1625	23.4096	52.7606	38.0481	35.276	44.383	38.5636	28.7218	33.0045	55.0651	30.0963	Anxa6	11	54979108	55033445	-	2930	protein_coding	annexin A6 [Source:MGI Symbol;Acc:MGI:88255]	-
ENSMUSG00000001663	41.0815	56.5022	18.7508	49.9426	51.1063	58.2394	72.2488	49.6413	33.8087	44.8802	47.0531	16.8051	54.6949	41.4625	45.9241	43.1649	53.2784	41.1229	Gstt1	10	75783813	75798584	-	1528	protein_coding	glutathione S-transferase, theta 1 [Source:MGI Symbol;Acc:MGI:107379]	-
ENSMUSG00000028139	3.02788	19.6139	4.552	16.3516	26.2717	6.83123	15.6745	19.8762	78.4932	37.5798	34.7776	46.3338	85.2233	115.179	83.4107	118.501	41.9626	60.4477	Riiad1	3	94464983	94480341	-	813	protein_coding	regulatory subunit of type II PKA R-subunit (RIIa) domain containing 1 [Source:MGI Symbol;Acc:MGI:1913603]	-
ENSMUSG00000020219	15.7109	59.9443	46.7593	38.6533	57.6636	40.1322	47.788	42.4445	40.1501	49.1718	45.7915	37.3118	62.7289	51.3826	33.7883	57.9582	42.6706	42.2357	Timm13	10	80899450	80900969	-	1371	protein_coding	translocase of inner mitochondrial membrane 13 [Source:MGI Symbol;Acc:MGI:1353432]	-
ENSMUSG00000082691	37.3389	29.7965	21.642	16.5679	56.5184	23.4146	59.537	28.1432	35.0339	69.4285	65.1261	44.3883	54.9574	57.9383	36.4962	73.8626	64.1013	36.9368	Dynlt1-ps1	6	135349408	135349749	-	342	processed_pseudogene	dynein light chain Tctex-type 1, pseuodogene 1 [Source:MGI Symbol;Acc:MGI:3642625]	-
ENSMUSG00000051989	22.635	64.651	32.6698	39.0124	51.505	53.0185	53.5818	62.5022	40.9104	44.2447	70.169	25.0886	47.2362	39.9532	48.938	38.89	34.7182	37.6892	Smim11	16	92301286	92313041	+	972	protein_coding	small integral membrane protein 11 [Source:MGI Symbol;Acc:MGI:1916186]	-
ENSMUSG00000025809	68.8782	43.1201	48.9688	67.2681	46.4879	34.7818	46.4996	49.4633	37.2311	31.7363	44.5387	39.8204	39.8699	36.7647	47.1491	39.7838	35.1587	49.886	Itgb1	8	128685654	128733200	+	4081	protein_coding	integrin beta 1 (fibronectin receptor beta) [Source:MGI Symbol;Acc:MGI:96610]	-
ENSMUSG00000024712	63.6578	30.5577	48.7059	25.8426	41.5101	39.8439	55.8741	44.4396	37.958	36.3604	35.1579	41.4757	51.4774	69.8349	44.1612	55.726	45.4697	35.8496	Rfk	19	17394043	17401349	+	2603	protein_coding	riboflavin kinase [Source:MGI Symbol;Acc:MGI:1914688]	-
ENSMUSG00000030579	122.253	36.073	186.676	31.8565	58.8283	35.4361	34.4729	22.9031	9.11186	64.4765	29.0675	33.5949	14.5575	17.586	25.7869	13.287	48.932	18.0227	Tyrobp	7	30413760	30417585	+	667	protein_coding	TYRO protein tyrosine kinase binding protein [Source:MGI Symbol;Acc:MGI:1277211]	-
ENSMUSG00000023224	48.3731	33.8868	25.365	61.4895	45.8915	48.6633	40.6905	55.3743	44.5505	26.853	35.4901	48.5535	74.9044	33.007	39.9222	38.8441	47.6752	52.0017	Serping1	2	84765387	84775444	-	2325	protein_coding	serine (or cysteine) peptidase inhibitor, clade G, member 1 [Source:MGI Symbol;Acc:MGI:894696]	-
ENSMUSG00000078713	68.9509	57.7221	35.3463	34.3552	58.9009	51.3358	65.1083	43.0322	41.1109	42.8505	48.2626	32.4205	42.908	41.839	33.8989	38.896	30.6483	33.0504	Tomm5	4	45105208	45108114	-	868	protein_coding	translocase of outer mitochondrial membrane 5 [Source:MGI Symbol;Acc:MGI:1915762]	-
ENSMUSG00000022037	159.36	18.1189	43.7645	26.5572	28.3725	19.2779	23.4955	22.4289	32.9407	40.9679	24.9143	103.714	70.163	57.9217	27.0433	34.5911	20.282	46.488	Clu	14	65968483	65981547	+	3437	protein_coding	clusterin [Source:MGI Symbol;Acc:MGI:88423]	-
ENSMUSG00000054435	23.4509	77.6109	28.2041	40.4543	86.5978	78.1134	76.3075	71.0458	9.40544	49.1719	44.6667	51.1879	27.1458	31.7825	16.3444	15.2281	55.9152	17.6352	Gimap4	6	48684549	48692060	+	1837	protein_coding	GTPase, IMAP family member 4 [Source:MGI Symbol;Acc:MGI:1349656]	-
ENSMUSG00000011884	22.8773	62.9216	52.1016	33.9719	66.753	62.7464	54.2424	63.1449	25.9188	63.2331	56.7199	23.2577	39.362	41.9362	29.7715	24.7383	51.4452	24.1213	Gltp	5	114669398	114690984	-	1762	protein_coding	glycolipid transfer protein [Source:MGI Symbol;Acc:MGI:1929253]	-
ENSMUSG00000081855	46.5721	76.1645	39.3631	39.3978	57.9879	50.0341	34.691	40.7306	38.3273	57.4428	52.8159	34.6275	27.2425	37.9712	54.3304	29.6556	39.2784	42.5851	Rpl17-ps5	5	22612628	22613182	-	555	processed_pseudogene	ribosomal protein L17, pseudogene 5 [Source:MGI Symbol;Acc:MGI:3704246]	-
ENSMUSG00000026649	3.12219	22.924	0	15.6835	21.3559	18.3471	10.8532	18.1185	76.0558	14.3207	36.1047	40.0558	97.0357	92.3454	89.9194	125.2	40.8917	75.4809	Cfap126	1	171113918	171126967	+	1774	protein_coding	cilia and flagella associated protein 126 [Source:MGI Symbol;Acc:MGI:1922722]	-
ENSMUSG00000037072	38.2322	47.7696	37.3383	48.5062	52.8824	53.7362	58.7241	55.9346	34.4219	40.4913	45.2179	24.2011	42.3954	40.8853	47.094	40.5206	46.6483	40.5465	Selenof	3	144570304	144597680	+	5819	protein_coding	selenoprotein F [Source:MGI Symbol;Acc:MGI:1927947]	-
ENSMUSG00000081094	72.8921	28.8974	47.8731	18.6834	61.8145	50.483	81.0932	29.4342	19.0981	60.1248	56.2379	39.8279	48.9364	31.173	45.0697	29.5833	51.4734	22.3399	Rpl19-ps11	8	19492936	19493526	+	591	processed_pseudogene	ribosomal protein L19, pseudogene 11 [Source:MGI Symbol;Acc:MGI:3642193]	-
ENSMUSG00000029484	77.7507	59.364	74.3543	50.1109	52.4486	49.1034	60.9495	51.2897	24.953	32.3158	41.4672	26.7981	29.985	29.4334	24.2072	21.7788	50.779	37.7742	Anxa3	5	96793339	96845966	+	3643	protein_coding	annexin A3 [Source:MGI Symbol;Acc:MGI:1201378]	-
ENSMUSG00000116757	48.2	75.6736	29.471	44.1962	50.9877	39.1682	27.2516	55.9914	13.0561	106.536	86.3367	9.20821	48.3231	24.2494	49.9337	26.8202	44.6034	14.6045	AC121151.1	17	16557246	16558043	+	798	processed_pseudogene	ribosomal protein L7A (Rpl7a) pseudogene	-
ENSMUSG00000058655	30.9913	48.5716	25.6234	33.2246	50.9406	52.698	53.1365	47.3332	40.0692	35.8254	43.9613	40.4016	49.9679	45.7279	47.8076	39.4414	62.7106	45.7202	Eif4b	15	102073773	102097173	+	4468	protein_coding	eukaryotic translation initiation factor 4B [Source:MGI Symbol;Acc:MGI:95304]	-
ENSMUSG00000006519	59.9721	27.8798	99.5024	65.757	41.4864	26.6023	18.3975	26.5163	32.9242	46.5056	37.6537	80.982	46.5265	44.6481	38.2275	30.9277	33.4277	35.298	Cyba	8	122424776	122432930	-	1039	protein_coding	cytochrome b-245, alpha polypeptide [Source:MGI Symbol;Acc:MGI:1316658]	-
ENSMUSG00000020029	56.3653	33.6564	70.2147	25.1538	42.5726	41.1213	38.879	32.2676	36.893	27.157	34.4057	43.2044	53.3025	50.539	47.3153	64.8152	52.2954	42.1841	Nudt4	10	95547007	95564146	-	3210	protein_coding	nudix (nucleoside diphosphate linked moiety X)-type motif 4 [Source:MGI Symbol;Acc:MGI:1918457]	-
ENSMUSG00000032562	49.5477	50.1116	88.9268	39.4168	51.7886	70.167	53.2579	51.5468	14.1527	56.4617	40.9215	26.8273	43.57	33.372	22.9501	25.7332	50.7114	22.6986	Gnai2	9	107614125	107635367	-	3779	protein_coding	guanine nucleotide binding protein (G protein), alpha inhibiting 2 [Source:MGI Symbol;Acc:MGI:95772]	-
ENSMUSG00000031897	27.7931	63.1989	26.1865	53.8544	47.7281	54.9205	61.0927	47.44	25.003	64.1784	57.9393	44.4711	47.105	31.7943	32.4775	30.551	44.7136	31.4286	Psmb10	8	105935735	105938444	-	1705	protein_coding	proteasome (prosome, macropain) subunit, beta type 10 [Source:MGI Symbol;Acc:MGI:1096380]	-
ENSMUSG00000098098	41.6001	59.664	61.3124	33.8797	77.5661	62.8236	84.0203	60.258	20.2463	76.7278	48.044	8.25972	22.0272	21.8058	24.1768	22.6838	43.5204	21.2201	Bvht	18	61639542	61647472	+	699	lincRNA	braveheart long non-coding RNA [Source:MGI Symbol;Acc:MGI:5434104]	-
ENSMUSG00000046733	57.3907	39.5451	45.2188	93.2373	26.6787	32.181	21.2128	31.2853	75.8607	41.3719	44.1009	22.1546	20.9433	30.9878	52.3234	51.6927	28.2626	75.239	Gprc5a	6	135065651	135084709	+	2083	protein_coding	G protein-coupled receptor, family C, group 5, member A [Source:MGI Symbol;Acc:MGI:1891250]	-
ENSMUSG00000021361	23.903	42.429	29.649	44.389	43.6707	35.7516	67.7418	42.992	35.1472	50.8674	48.6114	39.8885	58.4289	40.8209	43.2679	53.4288	44.7368	43.5584	Tmem14c	13	41016292	41022586	+	914	protein_coding	transmembrane protein 14C [Source:MGI Symbol;Acc:MGI:1913404]	-
ENSMUSG00000044408	15.8111	44.2564	23.9074	28.5933	63.1577	59.8993	64.6037	56.018	31.6864	47.3635	38.2402	33.7518	50.0751	50.1177	39.5582	46.5471	58.0106	32.9647	Sptssa	12	54645392	54656573	-	1518	protein_coding	serine palmitoyltransferase, small subunit A [Source:MGI Symbol;Acc:MGI:1913399]	-
ENSMUSG00000102824	65.8222	55.7218	75.5132	29.9346	53.5234	41.3576	46.1715	37.3142	29.8525	53.6053	44.8292	24.0551	49.1498	30.2653	33.4358	33.5465	47.1955	32.9419	Pdcd5-ps	1	189277443	189277823	-	381	processed_pseudogene	programmed cell death 5, pseudogene [Source:MGI Symbol;Acc:MGI:3782009]	-
ENSMUSG00000039016	71.5809	38.4344	71.674	39.9681	35.0763	37.4009	53.748	56.5955	28.6617	41.0306	47.6769	40.3744	20.4854	46.8244	43.8861	41.434	40.8951	27.5335	Timm8b	9	50603910	50605320	+	518	protein_coding	translocase of inner mitochondrial membrane 8B [Source:MGI Symbol;Acc:MGI:1353424]	-
ENSMUSG00000026003	53.0241	39.7187	54.8373	32.8437	32.7297	41.4207	32.4007	44.3495	46.8108	31.6356	53.0114	43.254	48.9469	47.5628	44.9889	50.1555	43.4288	41.278	Acadl	1	66830839	66863277	-	2005	protein_coding	acyl-Coenzyme A dehydrogenase, long-chain [Source:MGI Symbol;Acc:MGI:87866]	-
ENSMUSG00000028821	52.3391	50.7109	63.1667	30.0816	52.4625	52.4724	62.1722	54.114	29.536	41.5317	39.3721	31.2047	22.3039	39.2498	29.7287	36.1792	66.9156	27.8645	Syf2	4	134930898	134937548	+	2043	protein_coding	SYF2 homolog, RNA splicing factor (S. cerevisiae) [Source:MGI Symbol;Acc:MGI:1915842]	-
ENSMUSG00000022427	35.598	46.7491	53.0015	32.4059	38.6937	46.7816	54.3655	38.9366	42.7016	50.1858	58.0868	32.6957	51.5023	44.7958	34.8907	38.8536	38.7908	38.7257	Tomm22	15	79670861	79673400	+	1651	protein_coding	translocase of outer mitochondrial membrane 22 [Source:MGI Symbol;Acc:MGI:2450248]	-
ENSMUSG00000033379	23.1794	45.4526	25.7269	78.2046	37.2261	21.2219	28.3648	26.8223	61.2545	36.5932	57.8993	50.9454	39.7672	47.1422	65.8757	51.1176	23.4792	53.803	Atp6v0b	4	117884326	117887333	-	2051	protein_coding	ATPase, H+ transporting, lysosomal V0 subunit B [Source:MGI Symbol;Acc:MGI:1890510]	-
ENSMUSG00000030654	16.4268	49.0025	18.9507	56.0194	33.2539	40.3293	24.4438	38.8147	63.8405	36.4605	50.1234	40.0979	38.618	40.5847	61.0897	63.9324	39.5981	61.5512	Arl6ip1	7	118118891	118129662	-	2482	protein_coding	ADP-ribosylation factor-like 6 interacting protein 1 [Source:MGI Symbol;Acc:MGI:1858943]	-
ENSMUSG00000036181	24.952	32.1777	62.6744	37.3231	35.1273	33.8625	42.7975	37.2456	27.3827	39.1698	35.6571	30.9279	82.4268	43.2458	47.2642	44.4437	57.5541	58.1465	Hist1h1c	13	23738808	23740367	+	1560	protein_coding	histone cluster 1, H1c [Source:MGI Symbol;Acc:MGI:1931526]	-
ENSMUSG00000000787	124.582	33.3114	80.4462	34.8489	41.5926	36.4197	38.3494	47.8745	33.0707	16.5511	31.6013	34.1924	33.3176	29.9392	34.6261	35.874	48.919	36.6105	Ddx3x	X	13280970	13294052	+	5277	protein_coding	DEAD/H (Asp-Glu-Ala-Asp/His) box polypeptide 3, X-linked [Source:MGI Symbol;Acc:MGI:103064]	-
ENSMUSG00000031770	51.3068	37.8959	20.2634	31.6201	30.448	18.7675	18.4647	21.0821	64.6056	23.487	37.3965	47.8679	56.1566	41.2735	58.2808	83.5464	45.928	83.0013	Herpud1	8	94386438	94395377	+	2333	protein_coding	homocysteine-inducible, endoplasmic reticulum stress-inducible, ubiquitin-like domain member 1 [Source:MGI Symbol;Acc:MGI:1927406]	-
ENSMUSG00000026341	116.711	35.5336	119.096	28.6277	38.5042	34.0256	42.024	38.1164	23.3415	33.7757	36.8568	42.9115	31.4056	26.5884	33.9268	24.5399	37.7116	27.5594	Actr3	1	125392905	125435727	-	4631	protein_coding	ARP3 actin-related protein 3 [Source:MGI Symbol;Acc:MGI:1921367]	-
ENSMUSG00000034024	73.7081	39.7053	69.0041	31.4496	43.6175	32.782	46.6952	42.3728	34.4304	34.8715	36.1063	39.806	42.9643	44.8369	38.9504	42.0631	40.9894	34.885	Cct2	10	117051001	117063814	-	2557	protein_coding	chaperonin containing Tcp1, subunit 2 (beta) [Source:MGI Symbol;Acc:MGI:107186]	-
ENSMUSG00000068523	46.6849	53.6103	62.2157	34.2726	44.4609	48.2532	36.0188	49.0215	38.9683	44.7393	44.1585	30.8978	40.6102	39.3549	44.2731	42.1477	39.1086	29.269	Gng5	3	146499807	146505572	+	2765	protein_coding	guanine nucleotide binding protein (G protein), gamma 5 [Source:MGI Symbol;Acc:MGI:109164]	-
ENSMUSG00000053783	3.17398	15.5723	2.98126	12.8566	12.1726	11.6396	3.7599	20.1341	61.2758	15.5048	23.0559	42.7855	115.744	118.582	77.9608	132.295	32.2278	62.3411	1700016K19Rik	11	75999912	76003569	+	921	protein_coding	RIKEN cDNA 1700016K19 gene [Source:MGI Symbol;Acc:MGI:1921480]	-
ENSMUSG00000026796	50.6481	35.8074	89.0238	34.5882	48.4267	44.7574	35.9925	33.397	36.2196	34.2967	28.036	21.544	42.5755	44.8092	35.8416	43.7584	63.2412	37.4177	Fam129b	2	32876114	32925254	+	4672	protein_coding	family with sequence similarity 129, member B [Source:MGI Symbol;Acc:MGI:2442910]	-
ENSMUSG00000032412	97.2458	36.7311	66.361	45.7331	45.1475	32.0597	38.3829	33.7464	37.9419	38.6444	38.3072	46.0529	24.8799	34.1478	35.9621	34.3714	34.3861	38.1398	Atp1b3	9	96332655	96364442	-	2389	protein_coding	ATPase, Na+/K+ transporting, beta 3 polypeptide [Source:MGI Symbol;Acc:MGI:107788]	-
ENSMUSG00000095280	0	25.3555	0.175301	4.85359	1.41919	43.8113	17.6957	4.92731	368.584	228.953	22.3692	3.26079	0.712909	13.332	1.70058	1.32795	3.0745	15.7374	Gm21738	14	19415857	19418930	-	681	protein_coding	predicted gene, 21738 [Source:MGI Symbol;Acc:MGI:5433902]	-
ENSMUSG00000061904	46.184	37.6742	38.5242	34.7512	39.982	41.54	37.8856	33.0618	41.7689	46.0141	34.0392	45.3431	52.3106	45.8879	45.2573	53.619	38.7014	44.5455	Slc25a3	10	91116574	91124059	-	5550	protein_coding	solute carrier family 25 (mitochondrial carrier, phosphate carrier), member 3 [Source:MGI Symbol;Acc:MGI:1353498]	-
ENSMUSG00000053119	36.5937	53.2746	54.5107	29.3258	56.6795	54.8822	61.6284	52.7642	23.4823	38.6248	37.2491	20.7835	33.4402	38.0495	31.2257	27.5659	74.5408	31.7345	Chmp3	6	71543797	71582609	+	3250	protein_coding	charged multivesicular body protein 3 [Source:MGI Symbol;Acc:MGI:1913950]	-
ENSMUSG00000037095	252.964	24.259	157.449	49.5041	8.03099	23.8502	9.64093	22.0129	7.2147	45.4031	60.899	14.2802	12.5609	14.732	18.5827	14.0874	7.2602	13.5735	Lrg1	17	56119678	56122001	-	1408	protein_coding	leucine-rich alpha-2-glycoprotein 1 [Source:MGI Symbol;Acc:MGI:1924155]	-
ENSMUSG00000027078	25.5139	70.3412	35.6465	35.1027	72.727	58.3022	60.5828	42.6471	25.1856	52.0765	49.7235	14.8876	54.5187	29.6159	32.6851	15.0118	46.5247	32.6037	Ube2l6	2	84798828	84810335	+	1996	protein_coding	ubiquitin-conjugating enzyme E2L 6 [Source:MGI Symbol;Acc:MGI:1914500]	-
ENSMUSG00000031838	70.4186	33.1831	25.4336	42.9124	38.7177	16.8524	22.5916	28.444	36.5524	39.7765	64.702	82.0247	44.9647	26.2785	50.8063	45.0476	30.5078	53.9174	Ifi30	8	70762774	70766663	-	981	processed_transcript	interferon gamma inducible protein 30 [Source:MGI Symbol;Acc:MGI:2137648]	-
ENSMUSG00000008348	85.5692	44.5849	51.0036	44.3321	33.2066	29.0639	44.815	38.5503	48.4384	37.8238	37.2582	32.3358	47.4919	27.2825	37.4957	38.9699	31.8865	42.8342	Ubc	5	125385965	125390202	-	2893	protein_coding	ubiquitin C [Source:MGI Symbol;Acc:MGI:98889]	-
ENSMUSG00000033917	34.9173	33.5709	29.845	34.3899	31.0731	25.6484	42.4058	23.1716	40.3327	30.5202	37.7862	39.3245	47.6309	77.1981	52.272	84.6252	30.4991	57.3914	Gde1	7	118688545	118705778	-	1692	protein_coding	glycerophosphodiester phosphodiesterase 1 [Source:MGI Symbol;Acc:MGI:1891827]	-
ENSMUSG00000078153	97.0551	51.9688	78.3029	22.3486	59.235	56.6319	58.4178	26.9022	19.6052	49.5955	35.5728	30.0035	37.7853	39.0339	19.7295	26.2908	21.189	22.9308	Psme2b	11	48945354	48946190	-	837	protein_coding	protease (prosome, macropain) activator subunit 2B [Source:MGI Symbol;Acc:MGI:1341073]	-
ENSMUSG00000040703	0	18.6495	0	19.0657	24.0344	8.36989	3.00143	10.6042	71.5437	10.525	22.1321	31.4541	78.7803	120.449	107.066	114.156	33.8206	78.5119	Cyp2s1	7	25802475	25816913	-	4938	protein_coding	cytochrome P450, family 2, subfamily s, polypeptide 1 [Source:MGI Symbol;Acc:MGI:1921384]	-
ENSMUSG00000019370	27.7484	37.0335	23.7971	28.6618	50.4971	59.5416	64.6554	54.8474	24.2589	39.9524	40.4369	37.9583	54.9294	45.8396	26.3232	46.9023	58.2003	29.7507	Calm3	7	16915379	16924114	-	2423	protein_coding	calmodulin 3 [Source:MGI Symbol;Acc:MGI:103249]	-
ENSMUSG00000030189	70.3978	49.8627	67.4739	34.7391	41.1416	55.0233	44.0544	42.4427	36.3104	57.2385	56.6328	23.5419	30.9451	29.4177	31.8171	26.8408	29.9592	23.3763	Ybx3	6	131364855	131388476	-	3075	protein_coding	Y box protein 3 [Source:MGI Symbol;Acc:MGI:2137670]	CSD
ENSMUSG00000024747	6.10652	41.5603	3.46699	26.1251	29.8921	43.6986	13.0067	33.5943	91.7399	41.632	50.8876	32.5575	37.3636	58.2193	66.0618	81.0951	26.2894	67.8897	Aldh1a7	19	20692953	20727562	-	2066	protein_coding	aldehyde dehydrogenase family 1, subfamily A7 [Source:MGI Symbol;Acc:MGI:1347050]	-
ENSMUSG00000024063	6.65808	52.3479	10.5925	40.6756	48.5941	60.8393	72.5779	61.6359	25.0846	59.3463	50.6243	27.4778	51.0668	41.1612	28.2967	33.4854	53.4515	27.1114	Lbh	17	72918305	72941947	+	3212	protein_coding	limb-bud and heart [Source:MGI Symbol;Acc:MGI:1925139]	-
ENSMUSG00000042541	47.6506	35.7496	73.3401	28.8873	45.7311	44.341	39.6147	32.4092	35.8862	49.7387	44.8326	24.211	48.0126	42.3031	42.9409	40.5613	39.7091	33.8698	Sem1	6	6557294	6578663	-	3542	protein_coding	SEM1, 26S proteasome complex subunit [Source:MGI Symbol;Acc:MGI:109238]	-
ENSMUSG00000006941	35.2839	41.7681	60.3797	34.7722	46.8199	50.1707	52.3277	43.4841	35.8097	37.0466	37.2373	31.833	38.9009	47.4792	34.5046	34.5656	50.3591	36.2218	Eif1b	9	120492232	120495330	+	1125	protein_coding	eukaryotic translation initiation factor 1B [Source:MGI Symbol;Acc:MGI:1916219]	-
ENSMUSG00000037820	92.2191	39.6015	102.022	37.654	36.2634	37.615	49.4781	34.6273	20.8579	49.1146	32.2071	18.7328	35.9723	33.9838	31.0244	29.3463	43.5393	24.5223	Tgm2	2	158116402	158146436	-	4608	protein_coding	transglutaminase 2, C polypeptide [Source:MGI Symbol;Acc:MGI:98731]	-
ENSMUSG00000013593	34.1899	39.3658	37.4191	46.1051	41.1573	44.3928	41.2609	37.5276	42.0414	38.9091	47.8483	52.4187	40.8399	35.2698	39.1094	44.6236	42.7576	41.0843	Ndufs2	1	171234853	171251388	-	2313	protein_coding	NADH:ubiquinone oxidoreductase core subunit S2 [Source:MGI Symbol;Acc:MGI:2385112]	-
ENSMUSG00000091478	58.7716	44.0785	67.9681	23.6844	22.5744	57.5082	50.8898	25.3521	30.8422	17.7762	61.7738	30.7474	52.3122	53.2099	27.0295	38.7257	40.1547	42.5342	Gm10039	11	100361716	100362126	-	411	processed_pseudogene	predicted pseudogene 10039 [Source:MGI Symbol;Acc:MGI:3704382]	-
ENSMUSG00000078572	38.1869	45.0282	72.2864	27.6987	35.4602	35.3093	55.8045	43.7278	29.2533	52.3621	34.7321	24.9799	60.8735	38.2208	32.6065	38.2407	49.9141	30.6843	Ndufaf8	11	120098928	120100705	+	834	protein_coding	NADH:ubiquinone oxidoreductase complex assembly factor 8 [Source:MGI Symbol;Acc:MGI:1913676]	-
ENSMUSG00000004843	62.244	44.8776	46.9346	33.1946	42.4583	45.4196	47.2731	40.3957	43.2764	39.3583	48.4844	22.6164	35.7571	44.8907	42.0915	33.9594	41.2666	30.1183	Chmp2b	16	65539128	65562726	-	1928	protein_coding	charged multivesicular body protein 2B [Source:MGI Symbol;Acc:MGI:1916192]	-
ENSMUSG00000070436	18.8933	63.2256	18.618	105.695	41.3012	59.7415	36.4005	39.9042	46.2014	53.8986	51.7267	30.3428	37.7298	33.0946	39.0649	24.4808	17.4936	25.4205	Serpinh1	7	99345376	99353239	-	2443	protein_coding	serine (or cysteine) peptidase inhibitor, clade H, member 1 [Source:MGI Symbol;Acc:MGI:88283]	-
ENSMUSG00000113902	51.6406	45.7457	33.0288	34.7153	33.3611	35.622	46.7322	50.0866	30.7985	68.2616	42.7388	35.8923	36.2118	31.1523	44.9757	40.7851	54.5839	26.648	Ndufb1-ps	12	101968090	101977068	-	1153	bidirectional_promoter_lncRNA	NADH:ubiquinone oxidoreductase subunit B1 [Source:MGI Symbol;Acc:MGI:3780865]	-
ENSMUSG00000023939	29.3442	47.5258	9.43466	36.3602	46.1337	45.0487	49.334	41.1272	41.8105	66.8382	50.8316	30.9722	32.8874	45.8796	41.8077	44.7878	50.3545	32.4193	Mrpl14	17	45686322	45698495	+	949	protein_coding	mitochondrial ribosomal protein L14 [Source:MGI Symbol;Acc:MGI:1333864]	-
ENSMUSG00000028837	85.2333	36.2062	69.9027	29.1722	47.2797	26.9258	38.7703	40.4109	33.5322	33.3746	34.6981	36.954	43.3186	44.6391	34.9837	34.3005	36.0072	37.162	Psmb2	4	126677630	126709714	+	1204	protein_coding	proteasome (prosome, macropain) subunit, beta type 2 [Source:MGI Symbol;Acc:MGI:1347045]	-
ENSMUSG00000038650	57.473	25.4622	76.5338	36.868	25.5215	33.4098	31.5583	32.9177	39.0938	26.6288	42.2202	35.3471	44.6241	49.6901	44.6617	57.9414	37.9833	44.4412	Rnh1	7	141160326	141172857	-	2594	protein_coding	ribonuclease/angiogenin inhibitor 1 [Source:MGI Symbol;Acc:MGI:1195456]	-
ENSMUSG00000071076	54.3287	50.7981	37.1452	44.1394	38.4732	53.4286	27.0718	34.8869	29.4095	48.5793	38.5374	26.4322	68.649	47.3588	39.5238	26.3131	41.4967	35.5948	Jund	8	70698949	70700616	+	1668	protein_coding	jun D proto-oncogene [Source:MGI Symbol;Acc:MGI:96648]	TF_bZIP
ENSMUSG00000037710	20.1544	35.5139	12.0041	33.7754	37.7135	37.6512	24.9173	29.407	58.0689	57.5952	39.178	35.3463	39.7965	61.8077	58.799	71.4122	30.9039	53.4932	Cisd1	10	71330480	71344954	-	1084	protein_coding	CDGSH iron sulfur domain 1 [Source:MGI Symbol;Acc:MGI:1261855]	-
ENSMUSG00000020810	10.5606	53.1888	10.9598	22.111	55.1851	99.625	88.5994	60.6867	23.056	65.6775	70.4509	18.4292	35.7044	24.6205	23.2035	20.9498	30.4336	22.9358	Cygb	11	116645595	116654313	-	2331	protein_coding	cytoglobin [Source:MGI Symbol;Acc:MGI:2149481]	-
ENSMUSG00000032786	17.5933	19.6077	12.8777	16.6667	20.3186	18.744	12.7656	13.9734	62.7055	12.7748	19.851	33.3315	49.5961	72.0131	92.357	126.73	40.5749	93.2013	Alas1	9	106233455	106248654	-	6174	protein_coding	aminolevulinic acid synthase 1 [Source:MGI Symbol;Acc:MGI:87989]	-
ENSMUSG00000023367	29.9632	32.7149	15.3533	43.6054	24.1236	27.4249	26.2123	30.0136	58.8619	51.2083	35.9845	69.4207	51.3889	54.408	46.6525	64.4188	27.1213	46.0545	Tmem176a	6	48840919	48847071	+	3810	protein_coding	transmembrane protein 176A [Source:MGI Symbol;Acc:MGI:1913308]	-
ENSMUSG00000020057	48.0511	72.8196	42.4592	68.0395	48.8787	31.2185	46.8994	43.2668	46.2771	45.1513	62.8378	11.814	29.6556	17.9333	36.9058	24.0759	23.1761	35.4234	Dram1	10	88322804	88379080	-	3045	protein_coding	DNA-damage regulated autophagy modulator 1 [Source:MGI Symbol;Acc:MGI:1918962]	-
ENSMUSG00000036835	36.0804	33.0059	21.067	41.4782	36.5362	55.0061	41.5001	38.2298	49.5743	48.1858	36.9295	40.5328	31.8221	41.5295	56.5507	46.7652	35.451	44.1693	Psenen	7	30561863	30563627	-	1275	protein_coding	presenilin enhancer gamma secretase subunit [Source:MGI Symbol;Acc:MGI:1913590]	-
ENSMUSG00000046402	21.9875	49.9529	11.3888	31.0078	50.9107	63.5562	94.4845	52.7751	22.9171	55.0981	60.2698	12.4686	44.1189	44.6801	27.6731	20.7783	36.9669	32.867	Rbp1	9	98422961	98446575	+	2652	protein_coding	retinol binding protein 1, cellular [Source:MGI Symbol;Acc:MGI:97876]	-
ENSMUSG00000047843	20.3521	40.4217	36.5094	29.9303	32.0787	27.352	45.303	29.1484	34.0865	41.5114	42.7166	22.7596	62.7486	62.7721	44.9225	66.8737	42.9718	50.6403	Bri3	5	144244437	144446757	+	1648	protein_coding	brain protein I3 [Source:MGI Symbol;Acc:MGI:1933174]	-
ENSMUSG00000027808	48.0149	40.1896	52.8679	26.8377	39.5934	39.6633	43.0774	37.8795	38.3746	26.648	44.7503	33.9299	43.4095	38.8195	40.9018	43.9451	52.2452	41.545	Serp1	3	58519817	58525892	-	4611	protein_coding	stress-associated endoplasmic reticulum protein 1 [Source:MGI Symbol;Acc:MGI:92638]	-
ENSMUSG00000054364	113.639	27.2342	123.7	30.8945	36.947	38.5989	39.3313	34.4715	39.6229	25.6597	29.7232	26.4007	40.9226	25.0807	23.9752	16.3491	32.5598	26.5419	Rhob	12	8497661	8500009	-	2349	protein_coding	ras homolog family member B [Source:MGI Symbol;Acc:MGI:107949]	-
ENSMUSG00000024308	40.144	32.5779	44.3328	63.7176	32.2253	33.4259	26.896	29.1484	45.3872	43.3754	37.3595	48.3121	54.3105	34.2612	49.8677	35.5587	27.6141	52.9398	Tapbp	17	33915899	33929288	+	3296	protein_coding	TAP binding protein [Source:MGI Symbol;Acc:MGI:1201689]	-
ENSMUSG00000022890	43.207	50.8555	41.9927	30.2412	48.7864	43.4102	47.8827	46.4646	33.5087	41.538	48.0423	29.1651	27.6537	46.2412	35.931	40.9887	44.3065	30.2302	Atp5j	16	84827866	84835625	-	3130	protein_coding	ATP synthase, H+ transporting, mitochondrial F0 complex, subunit F [Source:MGI Symbol;Acc:MGI:107777]	-
ENSMUSG00000020321	26.5514	35.8014	25.113	34.3693	32.9434	38.9939	35.1278	37.4263	51.1738	25.4858	36.9547	48.27	55.4955	52.4846	50.1442	58.4804	38.7187	46.8136	Mdh1	11	21556787	21572367	-	2567	protein_coding	malate dehydrogenase 1, NAD (soluble) [Source:MGI Symbol;Acc:MGI:97051]	-
ENSMUSG00000081406	46.9769	48.8133	46.6377	22.7133	36.7257	49.5966	40.0769	41.0901	21.9952	56.4555	56.3175	36.0678	51.0459	36.0512	35.0002	25.5625	52.2202	25.9167	Rps6-ps4	2	75191073	75191822	-	750	processed_pseudogene	ribosomal protein S6, pseudogene 4 [Source:MGI Symbol;Acc:MGI:3650907]	-
ENSMUSG00000034880	22.5586	59.6912	37.9577	36.4416	57.9561	38.9389	34.6857	32.0042	37.1894	51.1541	39.7357	31.5945	15.4251	70.0918	42.2565	51.2504	33.4787	36.2517	Mrpl34	8	71464959	71465747	+	607	protein_coding	mitochondrial ribosomal protein L34 [Source:MGI Symbol;Acc:MGI:2137227]	-
ENSMUSG00000016256	41.8535	29.2692	22.8653	61.4271	37.7599	31.6396	31.5287	31.1296	38.3805	42.0588	41.3247	62.7331	49.7187	36.6994	45.0058	46.8587	29.7432	47.593	Ctsz	2	174427493	174439039	-	1441	protein_coding	cathepsin Z [Source:MGI Symbol;Acc:MGI:1891190]	-
ENSMUSG00000038801	10.1442	17.4195	0	16.1253	8.70881	9.36749	24.6586	30.6633	82.0525	17.5169	16.74	12.7778	64.4781	99.333	79.4688	151.716	25.1736	60.99	Scgb1c1	7	140845547	140846769	+	455	protein_coding	secretoglobin, family 1C, member 1 [Source:MGI Symbol;Acc:MGI:2655401]	-
ENSMUSG00000028964	15.0813	42.6294	21.7186	29.0253	43.2746	37.5647	60.6805	44.9527	38.5608	39.3178	43.6667	35.9445	55.9547	52.1289	36.1618	51.2905	38.5033	40.8153	Park7	4	150897133	150914437	-	2479	protein_coding	Parkinson disease (autosomal recessive, early onset) 7 [Source:MGI Symbol;Acc:MGI:2135637]	-
ENSMUSG00000026208	9.71324	35.7164	6.58275	51.7253	39.8789	32.3067	21.327	45.4921	34.8541	20.7889	56.5649	119.532	41.7539	33.1	47.0971	51.8413	36.3184	40.8364	Des	1	75360329	75368579	+	3754	protein_coding	desmin [Source:MGI Symbol;Acc:MGI:94885]	-
ENSMUSG00000115987	36.1264	33.5814	47.1509	30.9461	38.3817	31.4486	32.2239	37.8275	44.6928	50.52	45.0299	32.226	48.9164	44.8132	40.9377	44.6409	41.5347	43.7917	Vps28	15	76622087	76626086	-	2304	protein_coding	vacuolar protein sorting 28 [Source:MGI Symbol;Acc:MGI:1914164]	-
ENSMUSG00000026831	2.39152	18.3822	4.20613	15.2439	15.4234	18.6041	2.29662	14.4578	73.5971	15.6582	16.9818	43.9307	100.764	125.536	68.8946	117.766	26.8019	41.8053	1700007K13Rik	2	28462001	28466332	-	965	protein_coding	RIKEN cDNA 1700007K13 gene [Source:MGI Symbol;Acc:MGI:1916577]	-
ENSMUSG00000069744	64.1506	39.014	48.6862	31.5211	40.0873	30.5486	24.5713	33.2478	40.0141	58.477	47.5167	31.6325	35.3112	39.7047	41.1208	46.7369	33.9496	36.1077	Psmb3	11	97703399	97713500	+	2300	protein_coding	proteasome (prosome, macropain) subunit, beta type 3 [Source:MGI Symbol;Acc:MGI:1347014]	-
ENSMUSG00000000682	21.1274	25.0396	63.8637	19.5226	52.2722	40.5863	26.8394	30.798	23.699	44.484	27.3199	194.117	23.7808	13.5109	26.0534	13.8151	48.8701	26.5027	Cd52	4	134082448	134095082	-	1187	protein_coding	CD52 antigen [Source:MGI Symbol;Acc:MGI:1346088]	-
ENSMUSG00000050552	16.898	45.7284	22.0055	35.8198	46.0964	39.5806	30.7456	38.9291	37.61	71.9276	46.3569	28.1877	56.4648	42.9079	44.9349	39.6369	35.378	42.2519	Lamtor4	5	138255482	138259398	+	1302	protein_coding	late endosomal/lysosomal adaptor, MAPK and MTOR activator 4 [Source:MGI Symbol;Acc:MGI:1913346]	-
ENSMUSG00000024346	44.2849	55.4569	32.0341	27.9918	40.3815	50.4879	43.0849	39.5189	32.0044	47.0232	45.3261	27.5536	49.4571	36.9195	39.1886	42.1518	34.078	33.6742	Pfdn1	18	36403679	36454495	-	1077	protein_coding	prefoldin 1 [Source:MGI Symbol;Acc:MGI:1914449]	-
ENSMUSG00000001783	58.1293	41.5309	50.2171	27.6685	45.1263	30.8201	44.865	33.869	33.1023	32.3837	42.5872	28.6404	50.6842	39.5089	40.3172	39.424	44.1307	37.1655	Rtcb	10	85938637	85957823	-	2615	protein_coding	RNA 2',3'-cyclic phosphate and 5'-OH ligase [Source:MGI Symbol;Acc:MGI:106379]	-
ENSMUSG00000022528	6.26898	37.3346	7.79456	43.0977	32.7374	15.471	22.3718	20.5042	69.2624	40.1053	43.2272	28.7001	60.5715	66.5634	74.9828	58.3354	45.1651	46.3509	Hes1	16	30064384	30067796	+	2037	protein_coding	hes family bHLH transcription factor 1 [Source:MGI Symbol;Acc:MGI:104853]	bHLH
ENSMUSG00000042675	4.91202	41.7146	27.1318	52.5764	56.6386	52.0685	45.347	50.7453	40.7805	39.4448	36.345	48.9169	28.9358	34.4263	40.9196	42.6067	35.3221	39.3383	Ypel3	7	126776955	126780514	+	1848	protein_coding	yippee like 3 [Source:MGI Symbol;Acc:MGI:1913340]	-
ENSMUSG00000031176	60.8012	41.0608	31.9767	25.2392	48.9611	54.501	53.1797	48.6761	22.1776	29.3932	47.8464	22.4285	43.6436	36.5311	31.6365	37.4465	50.3449	31.5746	Dynlt3	X	9654267	9663003	-	2576	protein_coding	dynein light chain Tctex-type 3 [Source:MGI Symbol;Acc:MGI:1914367]	-
ENSMUSG00000024853	26.19	32.474	30.5562	28.1717	37.7194	37.3363	29.6664	36.5946	45.8166	44.7105	28.0386	40.212	46.731	57.2253	40.463	63.0691	40.215	51.2554	Sf3b2	19	5273923	5295455	-	3231	protein_coding	splicing factor 3b, subunit 2 [Source:MGI Symbol;Acc:MGI:2441856]	-
ENSMUSG00000097464	26.7627	58.476	15.5503	9.49189	49.6525	40.2312	90.4379	49.2951	9.90457	182.167	62.2775	3.23388	36.698	13.4579	15.7203	9.80425	34.2778	9.00051	Gm26736	6	4946568	4947803	+	1236	TEC	predicted gene, 26736 [Source:MGI Symbol;Acc:MGI:5477230]	-
ENSMUSG00000000563	52.1718	48.3385	57.407	29.6415	37.5521	32.6277	38.6694	37.171	37.8595	28.7597	49.4793	34.4437	39.9747	38.713	39.0891	41.3136	35.8532	37.3348	Atp5f1	3	105942698	105960099	-	4105	protein_coding	ATP synthase, H+ transporting, mitochondrial F0 complex, subunit B1 [Source:MGI Symbol;Acc:MGI:1100495]	-
ENSMUSG00000020469	73.0156	39.9812	6.87952	5.41751	0.982846	68.3004	5.86926	9.57858	53.7126	4.2215	6.65044	360.77	40.3205	10.6707	4.65274	6.02888	12.3161	6.69951	Myl7	11	5896637	5898782	-	590	protein_coding	myosin, light polypeptide 7, regulatory [Source:MGI Symbol;Acc:MGI:107495]	-
ENSMUSG00000017781	59.4327	44.5841	68.9564	31.8619	39.417	43.8555	36.0292	40.4194	27.2728	48.74	40.8347	29.2663	33.9473	41.8745	31.4032	32.7507	35.3465	29.9034	Pitpna	11	75588097	75628804	+	4129	protein_coding	phosphatidylinositol transfer protein, alpha [Source:MGI Symbol;Acc:MGI:99887]	-
ENSMUSG00000075700	47.7325	44.8436	53.2971	36.565	44.1041	42.5138	37.4102	43.2004	34.1379	27.932	38.9609	28.342	38.6948	46.4241	39.11	38.6894	37.2781	35.9109	Selenot	3	58576636	58593133	+	3436	protein_coding	selenoprotein T [Source:MGI Symbol;Acc:MGI:1916477]	-
ENSMUSG00000033685	64.9847	34.0485	97.0207	25.2835	38.6918	33.2458	34.5048	27.0378	17.2056	41.3629	30.2011	30.0685	49.1812	38.6965	36.5466	49.5146	32.83	34.6392	Ucp2	7	100493337	100502020	+	6989	protein_coding	uncoupling protein 2 (mitochondrial, proton carrier) [Source:MGI Symbol;Acc:MGI:109354]	-
ENSMUSG00000016541	24.8613	36.729	23.8513	38.7784	41.6124	51.7432	42.7629	49.371	33.3487	41.2328	47.6633	32.2871	33.9081	44.9217	36.6922	48.2746	49.0228	37.9306	Atxn10	15	85336245	85463212	+	1937	protein_coding	ataxin 10 [Source:MGI Symbol;Acc:MGI:1859293]	-
ENSMUSG00000027133	19.0064	44.4977	20.1299	26.6928	50.6327	70.2274	42.2164	34.7955	44.3118	41.7734	54.6326	38.8454	46.2789	48.4032	34.6156	34.1401	33.0946	30.5346	Nop10	2	112261926	112263269	+	1109	protein_coding	NOP10 ribonucleoprotein [Source:MGI Symbol;Acc:MGI:1913431]	-
ENSMUSG00000005161	17.1005	51.942	11.7031	32.8684	44.9644	62.5463	46.9133	43.4854	39.8532	48.126	55.0538	29.0299	37.6568	35.4819	38.8704	43.0126	38.2001	37.4228	Prdx2	8	84969587	84974834	+	3050	protein_coding	peroxiredoxin 2 [Source:MGI Symbol;Acc:MGI:109486]	-
ENSMUSG00000022234	56.6246	40.8328	39.707	27.4975	43.8508	45.0605	44.1684	36.0106	37.1964	33.7374	40.2623	39.3381	47.6665	37.1364	33.3246	36.1384	43.9924	31.3209	Cct5	15	31590800	31601804	-	2766	protein_coding	chaperonin containing Tcp1, subunit 5 (epsilon) [Source:MGI Symbol;Acc:MGI:107185]	-
ENSMUSG00000040128	63.084	45.5339	66.3285	47.834	35.3371	32.4898	29.8848	49.6518	38.542	43.3542	44.1788	31.837	37.8395	31.5378	37.1188	23.1083	29.8643	26.3365	Pnrc1	4	33245423	33290163	-	2095	protein_coding	proline-rich nuclear receptor coactivator 1 [Source:MGI Symbol;Acc:MGI:1917838]	-
ENSMUSG00000041028	48.2126	38.4858	47.6757	26.7773	45.287	51.4431	46.5772	41.001	27.1611	25.906	39.2057	29.5391	41.7871	42.2043	39.1125	42.4879	46.1362	34.1967	Ghitm	14	37120092	37135272	-	3756	protein_coding	growth hormone inducible transmembrane protein [Source:MGI Symbol;Acc:MGI:1913342]	-
ENSMUSG00000024091	97.3706	36.8019	64.5786	31.8389	33.2395	23.2647	32.8437	30.294	37.5438	31.7636	35.7913	24.708	41.6691	36.4184	45.9263	43.1621	33.2944	32.4293	Vapa	17	65578327	65613555	-	3492	protein_coding	vesicle-associated membrane protein, associated protein A [Source:MGI Symbol;Acc:MGI:1353561]	-
ENSMUSG00000016344	8.17639	45.624	16.0841	35.5063	46.9488	43.3104	74.0265	43.6225	36.7178	45.4886	45.7818	39.3167	45.7873	49.6533	31.0135	39.1245	33.5558	31.8737	Ppdpf	2	181187247	181188771	+	1336	protein_coding	pancreatic progenitor cell differentiation and proliferation factor [Source:MGI Symbol;Acc:MGI:1913746]	-
ENSMUSG00000080893	39.0377	49.9944	59.9869	10.3906	56.2569	26.9882	52.7183	30.7521	43.1955	25.609	54.2575	32.3397	62.6273	23.0793	16.5381	48.291	61.5805	16.5228	Gm15920	5	130188395	130188796	+	402	processed_pseudogene	predicted gene 15920 [Source:MGI Symbol;Acc:MGI:3801934]	-
ENSMUSG00000063628	81.3304	35.8996	105.713	22.7471	49.4622	26.9622	23.7853	33.5966	29.5257	36.899	37.3026	25.6928	40.8663	34.3625	26.2842	34.3057	28.6131	33.0662	Gm7665	18	16274648	16274944	-	297	processed_pseudogene	predicted pseudogene 7665 [Source:MGI Symbol;Acc:MGI:3645651]	-
ENSMUSG00000001383	55.1476	36.6636	33.9045	26.8753	32.3725	42.4041	55.1113	40.102	27.2741	44.3622	48.0129	22.9868	49.7814	39.6684	36.0509	33.7906	43.7639	35.947	Zmat2	18	36793923	36799660	+	2257	protein_coding	zinc finger, matrin type 2 [Source:MGI Symbol;Acc:MGI:1913742]	-
ENSMUSG00000024099	50.7354	53.4403	42.1471	29.1827	42.0437	33.8686	34.8383	39.73	39.0239	38.3599	51.7628	32.7208	44.5144	29.6628	37.0189	37.1505	33.386	34.1636	Ndufv2	17	66078638	66101559	-	2147	protein_coding	NADH:ubiquinone oxidoreductase core subunit V2 [Source:MGI Symbol;Acc:MGI:1920150]	-
ENSMUSG00000003955	11.9463	40.7394	2.94938	33.9717	44.3437	33.1252	65.9981	51.7349	34.8314	60.9485	66.9348	30.2571	21.3779	47.4809	36.6856	47.5927	35.3544	36.7226	Fam162a	16	36043761	36071594	-	850	protein_coding	family with sequence similarity 162, member A [Source:MGI Symbol;Acc:MGI:1917436]	-
ENSMUSG00000058715	95.0588	22.4553	139.049	50.2855	44.7847	21.5756	29.3195	30.4108	17.9805	49.0158	36.8397	28.8257	11.7445	20.3209	29.7401	13.1063	23.8149	38.5116	Fcer1g	1	171229572	171234365	-	874	protein_coding	Fc receptor, IgE, high affinity I, gamma polypeptide [Source:MGI Symbol;Acc:MGI:95496]	-
ENSMUSG00000054405	71.8389	42.2846	50.1349	24.6079	48.2665	50.9554	53.6168	52.6014	18.2821	34.9638	42.1871	23.8454	34.5015	31.6698	23.7545	29.7787	43.4317	24.0989	Dnajc8	4	132535550	132553742	+	2555	protein_coding	DnaJ heat shock protein family (Hsp40) member C8 [Source:MGI Symbol;Acc:MGI:1915848]	-
ENSMUSG00000007850	22.8596	34.386	31.4082	57.5542	34.2945	29.3159	30.7283	28.5222	55.4496	21.8287	40.6347	47.0229	35.7108	43.8892	58.6999	42.8895	34.1739	51.3729	Hnrnph1	11	50376990	50386528	+	5842	protein_coding	heterogeneous nuclear ribonucleoprotein H1 [Source:MGI Symbol;Acc:MGI:1891925]	-
ENSMUSG00000091896	58.4932	46.7408	58.7043	30.4267	37.561	33.811	43.2335	38.3368	35.7363	33.1021	45.0371	25.9678	46.2838	36.7517	32.9596	30.3265	40.0781	26.8819	Ube2d2a	18	35771559	35807172	+	2483	protein_coding	ubiquitin-conjugating enzyme E2D 2A [Source:MGI Symbol;Acc:MGI:1930715]	-
ENSMUSG00000058799	34.3508	50.0118	25.6975	27.5796	48.1104	46.5786	57.6081	50.8173	23.7312	39.7326	39.0768	21.699	38.4971	41.7077	40.582	24.229	57.7826	31.7739	Nap1l1	10	111473223	111498150	+	4994	protein_coding	nucleosome assembly protein 1-like 1 [Source:MGI Symbol;Acc:MGI:1855693]	-
ENSMUSG00000021939	57.9211	30.2512	22.491	46.1182	33.4294	28.41	25.661	29.8574	46.4032	52.4398	48.5383	41.3152	33.2624	45.0565	49.9667	43.8192	21.0255	43.2009	Ctsb	14	63122462	63145923	+	6051	protein_coding	cathepsin B [Source:MGI Symbol;Acc:MGI:88561]	-
ENSMUSG00000022354	42.8285	36.4244	54.1899	31.0727	37.1213	30.8175	30.9004	31.7752	33.4323	64.9044	47.3484	49.3422	49.1747	32.846	31.9093	39.6468	25.325	29.3271	Ndufb9	15	58933756	58939488	+	1031	protein_coding	NADH:ubiquinone oxidoreductase subunit B9 [Source:MGI Symbol;Acc:MGI:1913468]	-
ENSMUSG00000110331	25.4097	34.7626	23.616	19.5123	23.8547	29.3008	22.8763	20.8336	36.5571	49.7233	37.072	20.7368	65.2021	82.3872	51.3775	65.7597	51.6337	36.9778	Nudc-ps1	8	29286431	29286981	-	551	processed_pseudogene	nuclear distribution gene C homolog (Aspergillus), pseudogene 1 [Source:MGI Symbol;Acc:MGI:2142657]	-
ENSMUSG00000033960	17.1	69.9605	25.4724	30.4338	76.8577	91.8882	63.1857	69.7236	14.8747	36.4166	39.5943	7.50497	17.7563	26.3704	19.8274	16.6712	58.2498	15.658	Jcad	18	4634929	4682868	+	6730	protein_coding	junctional cadherin 5 associated [Source:MGI Symbol;Acc:MGI:2685174]	-
ENSMUSG00000030787	294.585	13.447	218.515	14.8822	14.6675	10.2211	18.6489	13.4617	8.38784	9.44282	6.0885	2.54501	10.5733	4.2909	16.2518	7.97241	11.5186	21.6382	Lyve1	7	110850607	110863239	-	2919	protein_coding	lymphatic vessel endothelial hyaluronan receptor 1 [Source:MGI Symbol;Acc:MGI:2136348]	-
ENSMUSG00000060188	37.8065	20.3342	17.8834	33.9354	12.5729	17.4813	1.27412	13.8082	73.3603	16.1464	18.8045	134.069	25.792	52.9468	54.5596	96.1769	16.6696	53.1726	Cxcl17	7	25400053	25412886	-	761	protein_coding	chemokine (C-X-C motif) ligand 17 [Source:MGI Symbol;Acc:MGI:2387642]	-
ENSMUSG00000053012	36.5937	49.5206	41.7486	28.3474	44.3068	45.1006	38.4481	44.4052	32.4508	26.734	35.3514	24.9465	28.4965	49.573	43.0494	39.2681	56.5909	31.3983	Krcc1	6	71271677	71285319	+	1913	protein_coding	lysine-rich coiled-coil 1 [Source:MGI Symbol;Acc:MGI:1889377]	-
ENSMUSG00000031422	72.4858	41.1733	56.853	25.3153	38.1653	44.371	39.5882	35.2365	33.1783	25.5292	30.3329	28.9125	32.897	45.1739	39.0342	38.2694	34.3358	35.3163	Morf4l2	X	136732942	136743690	-	3135	protein_coding	mortality factor 4 like 2 [Source:MGI Symbol;Acc:MGI:1927167]	-
ENSMUSG00000002395	32.3353	48.3984	30.9965	29.661	51.46	44.0884	58.9143	36.6357	24.0803	37.0833	35.4648	35.8843	41.1476	39.4374	32.6707	27.914	58.31	31.6119	Use1	8	71366848	71369732	+	2203	protein_coding	unconventional SNARE in the ER 1 homolog (S. cerevisiae) [Source:MGI Symbol;Acc:MGI:1914273]	-
ENSMUSG00000025781	39.5119	37.3862	33.2236	26.2896	37.0276	27.3479	38.8393	52.0189	31.4438	39.2487	50.6257	43.3369	36.0592	41.1586	31.922	40.4453	54.6091	34.4706	Atp5c1	2	10056016	10080510	-	1908	protein_coding	ATP synthase, H+ transporting, mitochondrial F1 complex, gamma polypeptide 1 [Source:MGI Symbol;Acc:MGI:1261437]	-
ENSMUSG00000007039	14.6804	52.2421	5.17088	55.2695	56.9687	61.3763	57.3014	57.4272	37.1709	63.1662	63.4618	10.9743	32.4793	27.6647	22.5367	20.2477	27.6784	28.5477	Ddah2	17	35059035	35062095	+	1593	protein_coding	dimethylarginine dimethylaminohydrolase 2 [Source:MGI Symbol;Acc:MGI:1859016]	-
ENSMUSG00000020358	65.8665	34.0182	71.276	28.658	40.1941	38.7659	48.9432	37.7714	29.6484	29.067	35.7581	28.9094	37.7693	34.2549	34.0118	35.3454	36.8332	27.2152	Hnrnpab	11	51600100	51606847	-	2782	protein_coding	heterogeneous nuclear ribonucleoprotein A/B [Source:MGI Symbol;Acc:MGI:1330294]	-
ENSMUSG00000038803	12.9422	41.8369	34.1622	25.0713	45.436	53.8158	48.3494	46.581	24.5043	51.1713	47.1781	23.8692	46.4008	61.2169	23.5706	30.334	53.0599	24.4113	Ost4	5	30905885	30907788	-	1272	protein_coding	oligosaccharyltransferase complex subunit 4 (non-catalytic) [Source:MGI Symbol;Acc:MGI:1914945]	-
ENSMUSG00000032301	66.865	41.3652	51.2276	30.7127	42.4511	35.2596	31.385	38.339	38.4659	39.7949	42.2664	26.8652	34.1512	32.9955	42.3676	35.868	33.8303	28.8514	Psma4	9	54950790	54958030	+	2370	protein_coding	proteasome (prosome, macropain) subunit, alpha type 4 [Source:MGI Symbol;Acc:MGI:1347060]	-
ENSMUSG00000079480	35.6867	44.4964	23.8393	30.4077	29.9886	49.7982	39.1501	40.4211	28.2742	72.6928	54.0683	24.9317	50.1791	19.8506	37.292	33.3394	44.8374	32.3618	Pin4	X	102119447	102127669	+	651	protein_coding	protein (peptidyl-prolyl cis/trans isomerase) NIMA-interacting, 4 (parvulin) [Source:MGI Symbol;Acc:MGI:1916963]	-
ENSMUSG00000042737	24.7774	53.5948	14.2892	46.9932	41.9608	26.7029	29.8432	50.3488	44.4035	27.1021	46.2121	30.4456	55.9224	38.9403	39.812	43.8225	30.4217	45.7601	Dpm3	3	89259358	89267079	+	919	protein_coding	dolichyl-phosphate mannosyltransferase polypeptide 3 [Source:MGI Symbol;Acc:MGI:1915813]	-
ENSMUSG00000064371	71.1864	19.7161	33.854	7.58965	92.319	26.9882	111.639	51.4	60.9057	94.1752	0	8.43645	0	0	10.243	4.49916	93.7494	4.25742	mt-Tt	MT	15289	15355	+	67	Mt_tRNA	mitochondrially encoded tRNA threonine [Source:MGI Symbol;Acc:MGI:102473]	-
ENSMUSG00000020486	4.36129	50.3689	11.4924	54.5491	55.5792	56.0784	76.6632	59.5788	18.8852	56.5758	57.3947	8.57801	24.0205	30.7452	21.2596	21.1002	55.1684	28.1347	2004-09-01	11	87568903	87590539	+	3563	protein_coding	septin 4 [Source:MGI Symbol;Acc:MGI:1270156]	-
ENSMUSG00000028249	88.2925	40.1804	65.448	30.8768	35.2345	38.8746	44.9611	38.7027	28.1823	33.3102	44.0791	19.9708	32.9199	30.3612	28.4666	26.6427	37.8545	25.8167	Sdcbp	4	6365650	6408423	+	6904	protein_coding	syndecan binding protein [Source:MGI Symbol;Acc:MGI:1337026]	-
ENSMUSG00000007836	45.329	41.8927	35.3058	39.3329	34.5372	40.9466	44.2233	35.4463	32.7775	40.7364	42.2318	30.1376	39.6763	38.3815	41.499	36.538	32.3769	38.4063	Hnrnpa0	13	58125879	58128556	-	2678	protein_coding	heterogeneous nuclear ribonucleoprotein A0 [Source:MGI Symbol;Acc:MGI:1924384]	-
ENSMUSG00000024772	161.163	43.0648	122.699	33.5769	26.3724	23.2868	25.8336	33.1522	15.9351	42.6655	29.4041	12.2812	19.2062	19.6039	21.4404	13.0178	26.3608	20.0393	Ehd1	19	6276725	6300096	+	3705	protein_coding	EH-domain containing 1 [Source:MGI Symbol;Acc:MGI:1341878]	-
ENSMUSG00000015759	34.5059	43.6024	30.1576	35.382	38.7062	35.5721	28.1638	37.7041	41.4054	57.1901	59.6578	24.4784	38.4598	35.034	40.0911	34.0634	32.4787	41.7037	Cnih1	14	46775567	46788411	-	1623	protein_coding	cornichon family AMPA receptor auxiliary protein 1 [Source:MGI Symbol;Acc:MGI:1277202]	-
ENSMUSG00000032366	92.5736	29.216	59.4782	35.8626	30.1936	36.2279	40.7534	33.7688	21.8497	32.1081	30.911	59.2698	26.7905	34.4995	24.9418	32.6684	35.8753	29.263	Tpm1	9	67022590	67049406	-	6485	protein_coding	tropomyosin 1, alpha [Source:MGI Symbol;Acc:MGI:98809]	-
ENSMUSG00000032473	85.2138	65.9388	45.464	73.7524	48.7787	38.0575	57.1031	32.1821	21.7837	33.4998	45.2192	2.22893	6.56826	17.9656	21.7446	13.7327	43.2003	32.9673	Cldn18	9	99689461	99717267	-	4456	protein_coding	claudin 18 [Source:MGI Symbol;Acc:MGI:1929209]	-
ENSMUSG00000071662	45.3764	31.633	37.1343	22.9313	36.7435	31.5455	51.3845	48.3223	31.3083	76.9014	47.8637	29.8622	38.1138	27.0274	30.4398	32.5059	40.155	25.9614	Polr2g	19	8793129	8798557	-	868	protein_coding	polymerase (RNA) II (DNA directed) polypeptide G [Source:MGI Symbol;Acc:MGI:1914960]	-
ENSMUSG00000025936	36.9701	47.2123	21.6895	30.7871	61.1032	58.2866	56.2177	64.9493	13.8662	42.4542	46.4155	7.15796	30.1812	30.9263	27.8408	17.9321	62.7985	28.3904	Gm4956	1	21285246	21298312	-	1365	transcribed_unprocessed_pseudogene	predicted gene 4956 [Source:MGI Symbol;Acc:MGI:3647976]	-
ENSMUSG00000055850	17.8062	37.3793	27.0066	33.5533	33.4208	32.7862	48.3833	32.0791	40.9525	37.9118	42.4899	25.8199	52.7687	47.8029	40.3579	42.413	47.5418	44.4541	Rnf181	6	72359714	72366956	-	2860	protein_coding	ring finger protein 181 [Source:MGI Symbol;Acc:MGI:1913760]	-
ENSMUSG00000046727	80.9361	44.0215	61.9178	39.9669	27.0882	29.6063	33.3118	23.3815	28.0646	32.0983	37.6691	12.7947	33.0661	40.1357	40.8384	39.676	47.3563	32.9297	Cystm1	18	36345619	36402980	+	2840	protein_coding	cysteine-rich transmembrane module containing 1 [Source:MGI Symbol;Acc:MGI:1913310]	-
ENSMUSG00000034932	34.6872	37.6279	66.5633	28.3971	31.9812	45.8706	30.0535	31.2538	29.4672	65.0094	47.0012	29.1185	29.0034	49.6427	28.283	37.2694	30.4543	31.9576	Mrpl54	10	81264713	81266934	-	825	protein_coding	mitochondrial ribosomal protein L54 [Source:MGI Symbol;Acc:MGI:1913297]	-
ENSMUSG00000009633	43.1004	40.0822	43.1741	37.7398	46.6034	65.8394	24.4905	70.8651	27.1135	44.4187	32.0642	13.2573	22.7736	28.8364	22.6527	20.4885	67.0244	29.6148	G0s2	1	193272161	193273217	-	871	protein_coding	G0/G1 switch gene 2 [Source:MGI Symbol;Acc:MGI:1316737]	-
ENSMUSG00000020423	33.7661	29.5485	41.6502	27.6221	29.2793	30.7003	31.3084	47.3866	53.8094	23.7295	23.8972	28.82	64.7035	27.5181	55.9025	19.9131	65.0602	44.8349	Btg2	1	134075170	134079120	-	2743	protein_coding	B cell translocation gene 2, anti-proliferative [Source:MGI Symbol;Acc:MGI:108384]	-
ENSMUSG00000024474	64.0546	30.9634	40.9695	29.3887	54.9084	34.2954	41.0131	31.7199	27.7086	21.0469	37.0035	37.3403	32.9753	47.0136	34.8555	38.3903	41.7735	33.3795	Ik	18	36744656	36757639	+	1996	protein_coding	IK cytokine [Source:MGI Symbol;Acc:MGI:1345142]	-
ENSMUSG00000004771	38.0008	56.607	44.528	35.2051	46.8697	37.5991	49.7208	45.1252	31.1077	33.3534	48.4068	15.5992	43.162	27.6201	36.126	26.7391	34.7008	28.0153	Rab11a	9	64715299	64737758	-	2992	protein_coding	RAB11A, member RAS oncogene family [Source:MGI Symbol;Acc:MGI:1858202]	-
ENSMUSG00000028955	61.9358	40.6947	78.6362	25.937	51.3508	57.5376	51.4935	44.9918	19.4743	49.4861	32.9557	15.4985	25.1592	24.1776	21.2309	17.8633	36.6627	23.2734	Vamp3	4	151047300	151057963	-	2889	protein_coding	vesicle-associated membrane protein 3 [Source:MGI Symbol;Acc:MGI:1321389]	-
ENSMUSG00000020733	83.2812	15.44	67.969	15.1892	14.8108	15.4318	17.6291	15.6422	31.8426	11.9898	22.4815	43.2478	81.93	57.5951	40.8648	69.6845	27.8312	45.3855	Slc9a3r1	11	115163341	115181181	+	1925	protein_coding	solute carrier family 9 (sodium/hydrogen exchanger), member 3 regulator 1 [Source:MGI Symbol;Acc:MGI:1349482]	-
ENSMUSG00000016528	89.2467	33.1377	118.595	29.6093	27.5225	35.082	30.4268	25.2915	25.1247	34.1811	28.1586	21.11	37.4262	24.2331	28.689	23.3939	35.4376	31.5303	Mapkapk2	1	131053700	131097826	-	3041	protein_coding	MAP kinase-activated protein kinase 2 [Source:MGI Symbol;Acc:MGI:109298]	-
ENSMUSG00000008035	20.244	46.158	27.04	52.7248	50.5032	42.3647	36.321	37.6365	27.4994	38.5463	52.4419	11.953	49.3118	44.2219	35.6563	31.3343	40.1083	33.5686	Mid1ip1	X	10715013	10719690	+	2128	protein_coding	Mid1 interacting protein 1 (gastrulation specific G12-like (zebrafish)) [Source:MGI Symbol;Acc:MGI:1915291]	-
ENSMUSG00000068706	19.4712	44.0456	26.9967	32.328	48.5238	48.7692	44.2557	48.1817	31.1626	40.3057	54.3504	38.7829	34.3902	23.2359	31.057	43.4029	35.2618	32.3799	Gm10250	15	5120654	5121135	-	482	processed_pseudogene	predicted pseudogene 10250 [Source:MGI Symbol;Acc:MGI:3642408]	-
ENSMUSG00000030707	34.497	33.0906	96.6878	26.3637	46.0486	34.6215	33.8448	21.2586	16.5348	34.2473	22.8073	143.668	20.5102	14.7638	23.7041	11.0699	37.6608	24.9652	Coro1a	7	126699773	126707787	-	2783	protein_coding	coronin, actin binding protein 1A [Source:MGI Symbol;Acc:MGI:1345961]	-
ENSMUSG00000060373	74.9693	40.6502	50.713	30.893	41.0334	42.9729	34.6126	43.191	33.1462	40.6086	33.4839	32.1912	29.4305	34.2699	34.05	27.8009	23.3385	28.2098	Hnrnpc	14	52073377	52104028	-	4322	protein_coding	heterogeneous nuclear ribonucleoprotein C [Source:MGI Symbol;Acc:MGI:107795]	-
ENSMUSG00000021917	43.9868	38.145	32.4318	31.2942	35.883	26.6503	28.2226	30.786	40.6035	26.6361	28.8885	36.2482	44.1437	53.7537	39.1192	55.5312	35.5303	45.8367	Spcs1	14	30999826	31001672	-	1546	protein_coding	signal peptidase complex subunit 1 homolog (S. cerevisiae) [Source:MGI Symbol;Acc:MGI:1916269]	-
ENSMUSG00000051255	54.5307	48.2093	30.2227	21.442	54.0509	60.6403	55.629	37.8004	28.0751	20.4452	24.5683	24.3919	29.6099	35.9188	34.0079	39.6144	43.9354	28.3231	Gm6563	19	23675844	23676712	+	869	protein_coding	predicted pseudogene 6563 [Source:MGI Symbol;Acc:MGI:3646907]	-
ENSMUSG00000038489	54.9214	45.8625	85.3747	22.0793	34.4999	29.2758	40.4631	25.9556	35.729	42.7693	41.4758	18.1318	32.5342	35.023	36.1856	32.1906	31.2008	27.7344	Polr2l	7	141471860	141475132	-	1650	protein_coding	polymerase (RNA) II (DNA directed) polypeptide L [Source:MGI Symbol;Acc:MGI:1913741]	-
ENSMUSG00000005625	61.75	42.171	47.0632	33.8513	36.5522	29.5757	38.7229	37.7676	26.9003	32.5232	36.7421	30.1658	33.0231	34.7165	39.5319	33.9017	41.7116	34.0015	Psmd4	3	95032694	95042614	-	2808	protein_coding	proteasome (prosome, macropain) 26S subunit, non-ATPase, 4 [Source:MGI Symbol;Acc:MGI:1201670]	-
ENSMUSG00000034035	1.98597	5.05092	1.90355	26.1865	19.7769	0.539384	1.6302	3.48651	72.4185	1.38687	25.1928	63.8879	33.4141	92.1095	92.5591	132.869	30.4863	65.5644	Ccdc17	4	116596654	116600266	+	2634	protein_coding	coiled-coil domain containing 17 [Source:MGI Symbol;Acc:MGI:1915667]	-
ENSMUSG00000022505	49.0184	81.5732	39.982	63.9163	48.9494	52.2817	58.7453	56.9411	14.4136	37.1701	38.9711	8.18792	12.9741	20.2783	11.5567	14.4026	36.3185	22.3925	Emp2	16	10281749	10313968	-	8644	protein_coding	epithelial membrane protein 2 [Source:MGI Symbol;Acc:MGI:1098726]	-
ENSMUSG00000026417	60.739	38.7737	18.5372	11.0635	22.811	25.2861	15.314	19.2401	31.3641	66.0883	51.8963	53.8961	49.3504	59.7341	59.3993	39.1241	18.4512	26.5758	Pigr	1	130826684	130852249	+	4025	protein_coding	polymeric immunoglobulin receptor [Source:MGI Symbol;Acc:MGI:103080]	-
ENSMUSG00000069833	71.6543	36.1892	66.1827	36.0829	41.9099	36.5749	48.674	35.2153	17.8207	16.3691	34.4914	18.0436	20.4705	26.2287	29.0229	21.5724	82.6586	27.8476	Ahnak	19	8989284	9076919	+	18543	protein_coding	AHNAK nucleoprotein (desmoyokin) [Source:MGI Symbol;Acc:MGI:1316648]	-
ENSMUSG00000031029	35.8692	39.459	38.816	25.4165	45.6321	50.439	32.1013	35.8281	24.7465	31.4172	38.0425	44.8295	44.7179	40.7343	25.4001	35.8271	48.2249	28.9095	Eif3f	7	108934417	108942951	+	2891	protein_coding	eukaryotic translation initiation factor 3, subunit F [Source:MGI Symbol;Acc:MGI:1913335]	-
ENSMUSG00000096942	56.2025	38.5608	48.5151	26.6195	46.9993	55.7325	49.6502	49.5946	21.012	25.3997	33.7256	33.1845	11.876	28.5962	33.0017	24.5009	50.3329	31.353	Rps19-ps6	12	110898114	110898551	+	438	processed_pseudogene	ribosomal protein S19, pseudogene 6 [Source:MGI Symbol;Acc:MGI:5011818]	-
ENSMUSG00000060992	37.0982	47.5127	25.4929	28.1192	39.3501	41.5125	40.5104	36.845	36.5121	58.583	52.9753	20.2093	40.4923	33.0629	36.3918	29.6505	27.8811	32.248	Copz1	15	103272714	103299868	+	3662	protein_coding	coatomer protein complex, subunit zeta 1 [Source:MGI Symbol;Acc:MGI:1929063]	-
ENSMUSG00000079139	34.3704	29.6634	77.7763	20.0051	60.0606	62.2182	45.6839	32.5665	24.192	35.6101	47.1556	21.4499	36.2837	26.3252	21.1849	16.015	44.7221	26.5816	Gm4204	1	135231995	135233225	+	1231	processed_pseudogene	predicted gene 4204 [Source:MGI Symbol;Acc:MGI:3782381]	-
ENSMUSG00000032294	40.9171	33.2065	65.4787	34.6877	43.8301	35.0723	35.2588	33.7601	22.1007	30.2475	34.6145	47.3336	35.7111	35.0501	30.8506	36.7085	35.2662	31.2161	Pkm	9	59656368	59679375	+	5001	protein_coding	pyruvate kinase, muscle [Source:MGI Symbol;Acc:MGI:97591]	-
ENSMUSG00000030688	23.0877	34.7934	24.33	30.2708	31.3632	28.0314	36.4753	29.5315	30.4724	28.4179	45.2268	43.0116	44.8419	46.6277	44.9493	51.3165	50.914	37.1109	Stard10	7	101317086	101346626	+	2419	protein_coding	START domain containing 10 [Source:MGI Symbol;Acc:MGI:1860093]	-
ENSMUSG00000053560	38.4131	25.6037	50.5913	38.0879	34.0358	24.1004	47.4153	44.7315	48.8308	12.8735	35.7133	25.8375	49.8068	44.1949	33.2825	37.5518	31.4781	36.8406	Ier2	8	84661331	84662852	-	1522	protein_coding	immediate early response 2 [Source:MGI Symbol;Acc:MGI:104815]	-
ENSMUSG00000033429	5.47181	37.9001	8.36658	24.9998	38.6182	34.9915	15.6481	34.268	41.686	27.4427	50.9423	25.5085	49.0424	67.9343	55.141	72.9646	29.7596	38.6183	Mcee	7	64392607	64412125	+	956	protein_coding	methylmalonyl CoA epimerase [Source:MGI Symbol;Acc:MGI:1920974]	-
ENSMUSG00000040181	14.4238	56.1583	15.7178	47.1309	69.3574	52.8597	58.6885	74.3092	19.1303	50.1509	52.4484	7.95448	23.7751	21.498	20.1671	14.4793	33.8966	27.0587	Fmo1	1	162829561	162866610	-	6304	protein_coding	flavin containing monooxygenase 1 [Source:MGI Symbol;Acc:MGI:1310002]	-
ENSMUSG00000031347	13.086	34.8531	13.9252	18.6685	29.1818	36.0951	38.9625	31.5979	40.9324	28.2459	33.724	29.7535	61.4764	56.6078	43.4918	64.8306	37.487	43.6461	Cetn2	X	72913532	72918411	-	1646	protein_coding	centrin 2 [Source:MGI Symbol;Acc:MGI:1347085]	-
ENSMUSG00000028670	13.7076	37.0715	29.5253	31.3882	25.5497	24.7752	30.279	27.5999	31.9563	33.5487	43.1504	26.6739	68.4104	58.5917	46.2127	52.9215	35.0175	40.1742	Lypla2	4	135968224	135972626	-	2054	protein_coding	lysophospholipase 2 [Source:MGI Symbol;Acc:MGI:1347000]	-
ENSMUSG00000022450	23.2362	47.0992	31.9495	31.2195	41.4813	33.7058	43.7617	43.4404	27.8162	30.056	44.9829	37.8861	38.5867	32.6017	33.0565	36.7892	48.0061	30.2511	Ndufa6	15	82350140	82354322	-	1801	protein_coding	NADH:ubiquinone oxidoreductase subunit A6 [Source:MGI Symbol;Acc:MGI:1914380]	-
ENSMUSG00000100215	49.7307	74.579	45.5211	19.2616	35.1442	35.8772	18.1888	45.9352	14.909	79.2491	57.9938	11.6229	41.6836	19.9146	20.9046	13.093	49.14	20.7864	Gm8292	1	55335401	55335796	+	396	processed_pseudogene	predicted gene 8292 [Source:MGI Symbol;Acc:MGI:3648460]	-
ENSMUSG00000074800	32.3317	42.7335	46.7139	23.5566	37.8182	33.2254	42.6585	38.3924	32.7159	36.6985	47.2491	18.7244	54.0272	34.8161	19.1151	19.0041	69.6127	23.3277	Gm4149	13	75644896	75645171	+	276	processed_pseudogene	predicted pseudogene 4149 [Source:MGI Symbol;Acc:MGI:3782325]	-
ENSMUSG00000068882	63.5362	35.0776	70.2462	31.2604	35.8845	37.1927	39.0534	36.4657	42.4066	24.7531	37.4531	26.0752	28.0634	23.9004	38.1465	24.8412	29.3648	28.8077	Ssb	2	69861562	69871846	+	2160	protein_coding	Sjogren syndrome antigen B [Source:MGI Symbol;Acc:MGI:98423]	-
ENSMUSG00000059796	84.4886	33.658	62.9402	25.5862	34.5644	26.5528	28.4444	34.9217	28.8676	27.8148	32.3261	40.5328	32.0695	29.4043	26.543	32.1475	36.6584	33.6226	Eif4a1	11	69666936	69672423	-	4334	protein_coding	eukaryotic translation initiation factor 4A1 [Source:MGI Symbol;Acc:MGI:95303]	-
ENSMUSG00000021496	34.6595	26.9587	0	26.4099	25.8432	44.7085	30.6965	27.6552	28.782	92.4504	39.3137	25.7332	28.9618	71.9752	38.8074	45.6031	32.7076	29.7039	Pcbd2	13	55727368	55776830	+	546	protein_coding	pterin 4 alpha carbinolamine dehydratase/dimerization cofactor of hepatocyte nuclear factor 1 alpha (TCF1) 2 [Source:MGI Symbol;Acc:MGI:1919812]	-
ENSMUSG00000006095	19.6319	47.3086	36.7577	38.5133	40.8167	36.544	48.5089	34.0473	32.6339	37.1933	39.0552	25.955	45.115	32.354	37.1516	33.74	32.712	32.074	Tbcb	7	30224131	30232272	-	1442	protein_coding	tubulin folding cofactor B [Source:MGI Symbol;Acc:MGI:1913661]	-
ENSMUSG00000044217	18.5288	35.288	11.2536	80.2604	30.6413	25.6427	24.356	19.1283	43.5284	34.6275	35.4784	47.7379	27.246	39.4462	51.0121	48.2728	27.1058	50.5176	Aqp5	15	99590782	99594829	+	2599	protein_coding	aquaporin 5 [Source:MGI Symbol;Acc:MGI:106215]	-
ENSMUSG00000085442	77.5875	46.7728	29.9731	24.5524	41.2718	55.7097	38.6414	46.4252	29.2515	27.4367	49.5299	21.2269	24.4085	28.0157	21.078	18.7594	45.9871	23.0856	Gm3362	15	37943327	37943792	-	466	processed_pseudogene	predicted pseudogene 3362 [Source:MGI Symbol;Acc:MGI:3781540]	-
ENSMUSG00000018821	93.4827	28.0929	45.7816	20.1299	26.6638	28.7366	35.5252	20.361	28.8708	29.4207	29.9716	29.2029	40.177	40.588	31.4753	45.7044	31.0892	44.2773	Avpi1	19	42123273	42129059	-	1236	protein_coding	arginine vasopressin-induced 1 [Source:MGI Symbol;Acc:MGI:1916784]	-
ENSMUSG00000086567	45.9565	54.8978	49.3023	26.6046	40.1648	50.9922	50.0092	45.4127	22.3259	49.1668	59.0513	10.5917	21.4373	14.6312	28.4093	11.9012	46.3853	19.3693	Gm2830	13	54499705	54500089	-	385	processed_pseudogene	predicted gene 2830 [Source:MGI Symbol;Acc:MGI:3781002]	-
ENSMUSG00000026021	75.7414	33.2699	66.993	22.6575	32.1224	46.9722	26.8889	39.3023	24.3406	26.4745	31.1304	30.3586	30.2012	30.0069	27.3966	34.094	39.6891	28.7171	Sumo1	1	59586558	59670834	-	2076	protein_coding	small ubiquitin-like modifier 1 [Source:MGI Symbol;Acc:MGI:1197010]	-
ENSMUSG00000021057	29.8961	39.9186	19.8383	31.5581	65.0211	56.0429	95.8682	39.5317	7.65936	19.8554	28.1409	6.59694	8.03935	30.1636	18.3412	18.6326	112.188	18.6968	Akap5	12	76324891	76334153	+	6824	protein_coding	A kinase (PRKA) anchor protein 5 [Source:MGI Symbol;Acc:MGI:2685104]	-
ENSMUSG00000001496	2.7068	38.4793	8.98919	54.9941	37.0331	22.6322	20.0315	23.7379	67.9432	21.6175	40.6475	18.7098	39.2415	44.911	59.8713	46.797	35.4489	61.6836	Nkx2-1	12	56531958	56536908	-	2842	protein_coding	NK2 homeobox 1 [Source:MGI Symbol;Acc:MGI:108067]	Homeobox
ENSMUSG00000015337	1.73683	2.30785	4.60449	17.6655	12.0013	0	0.130305	3.73811	61.3397	3.59271	14.7649	46.1856	65.1149	93.3274	79.4902	132.545	26.1847	79.9274	Endog	2	30171493	30174069	+	1063	protein_coding	endonuclease G [Source:MGI Symbol;Acc:MGI:1261433]	-
ENSMUSG00000081534	38.7572	36.1165	34.3255	30.6974	36.5367	43.3343	48.0345	42.6908	22.9761	57.2197	27.9807	18.0518	45.7835	33.9423	26.1783	27.5694	42.3072	31.2399	Slc48a1	15	97778520	97792692	+	2751	protein_coding	solute carrier family 48 (heme transporter), member 1 [Source:MGI Symbol;Acc:MGI:1914989]	-
ENSMUSG00000007564	56.7425	40.2207	53.8977	30.6782	30.8271	25.8997	36.1413	31.1687	28.3556	39.9659	37.0811	24.3833	39.9137	39.1484	31.1979	35.2082	31.7742	30.7384	Ppp2r1a	17	20945311	20965916	+	3411	protein_coding	protein phosphatase 2, regulatory subunit A, alpha [Source:MGI Symbol;Acc:MGI:1926334]	-
ENSMUSG00000068466	79.3015	30.5782	72.5859	16.7596	36.0933	42.056	41.0414	49.3295	14.3365	8.45603	32.5912	16.8227	34.892	33.6466	24.8882	31.633	52.8376	25.0283	Gm5518	19	29160118	29160765	+	648	processed_pseudogene	predicted gene 5518 [Source:MGI Symbol;Acc:MGI:3648673]	-
ENSMUSG00000024425	62.3689	21.0017	49.0356	31.2447	25.7724	35.1365	22.49	30.1938	29.5945	17.4973	30.1542	40.3744	41.6135	46.3894	36.0665	45.7028	41.8482	36.0174	Ndfip1	18	38418975	38464399	+	930	protein_coding	Nedd4 family interacting protein 1 [Source:MGI Symbol;Acc:MGI:1929601]	-
ENSMUSG00000073682	5.84257	70.0699	19.6448	26.5135	47.3038	9.80946	16.3646	46.5731	18.6834	100.889	63.3022	9.71031	44.4814	24.3272	33.4814	19.8419	62.8796	22.0082	Gm10563	4	155614413	155645408	-	237	protein_coding	predicted gene 10563 [Source:MGI Symbol;Acc:MGI:3642630]	-
ENSMUSG00000072473	0	25.1985	0	9.3155	12.0524	9.26898	15.1551	10.7002	41.6751	1.95348	21.7233	34.722	96.1191	103.226	62.0174	121.145	22.4588	54.988	1700024G13Rik	14	32376068	32388391	-	850	protein_coding	RIKEN cDNA 1700024G13 gene [Source:MGI Symbol;Acc:MGI:1914335]	-
ENSMUSG00000090136	99.1044	31.2393	80.3932	17.9155	23.2909	39.8528	40.8681	27.4454	20.1414	49.3649	45.2262	29.9171	19.3697	33.8816	21.0598	20.0963	25.7972	16.6119	Gm10177	9	37252922	37253365	+	444	transcribed_processed_pseudogene	predicted gene 10177 [Source:MGI Symbol;Acc:MGI:3704330]	-
ENSMUSG00000035199	55.8016	18.1252	32.2044	48.4376	29.8921	29.5576	35.4451	33.8024	33.4166	23.6057	28.4911	46.5622	34.8703	40.0748	41.7919	39.3006	29.2956	40.2692	Arl6ip5	6	97210689	97233315	+	1442	protein_coding	ADP-ribosylation factor-like 6 interacting protein 5 [Source:MGI Symbol;Acc:MGI:1929501]	-
ENSMUSG00000035478	37.4764	41.6456	15.2604	26.5605	41.1003	43.161	54.5833	32.6635	19.7067	47.5491	41.9337	27.1263	37.4529	38.9219	24.3928	34.8929	49.7107	26.2504	Mbd3	10	80392539	80399550	-	1987	protein_coding	methyl-CpG binding domain protein 3 [Source:MGI Symbol;Acc:MGI:1333812]	MBD
ENSMUSG00000030701	17.3205	32.4006	11.4139	22.8516	32.5886	27.55	43.1622	26.3742	36.0808	21.9576	31.3299	21.2148	55.2531	68.2517	37.9713	67.7092	40.7662	45.7431	Plekhb1	7	100642892	100662414	-	3713	protein_coding	pleckstrin homology domain containing, family B (evectins) member 1 [Source:MGI Symbol;Acc:MGI:1351469]	-
ENSMUSG00000033161	25.6985	19.0859	30.4983	35.6222	18.0472	13.3456	16.7079	15.9671	46.0535	17.4115	27.5627	55.2674	39.2784	65.7048	55.1742	79.756	19.9786	58.7069	Atp1a1	3	101576219	101604684	-	4568	protein_coding	ATPase, Na+/K+ transporting, alpha 1 polypeptide [Source:MGI Symbol;Acc:MGI:88105]	-
ENSMUSG00000028643	42.9059	43.7668	32.6193	24.01	39.3846	43.7803	48.9028	34.7406	27.6366	40.537	42.8027	24.6038	38.8132	33.2908	22.2316	32.8899	38.2782	28.5438	Svbp	4	119195306	119201298	+	1065	protein_coding	small vasohibin binding protein [Source:MGI Symbol;Acc:MGI:1916466]	-
ENSMUSG00000024966	37.3131	39.1665	41.533	26.3263	32.3786	29.1839	18.6131	22.3499	42.5125	45.6186	30.325	34.7633	39.8326	54.2546	52.2881	44.2802	22.7278	24.9786	Stip1	19	7020696	7040026	-	2173	protein_coding	stress-induced phosphoprotein 1 [Source:MGI Symbol;Acc:MGI:109130]	-
ENSMUSG00000043421	29.0133	42.5156	21.7546	51.7661	51.4338	53.5133	55.1296	61.1633	24.4018	53.7428	48.5474	3.88005	24.4601	18.0246	27.532	19.1853	27.915	23.7183	Hilpda	6	29272488	29275446	+	1103	protein_coding	hypoxia inducible lipid droplet associated [Source:MGI Symbol;Acc:MGI:1916823]	-
ENSMUSG00000102869	39.5357	41.7737	41.2668	19.687	41.1559	52.6354	59.7177	44.1243	18.4598	20.5741	23.4332	15.6487	39.7509	36.5668	26.39	30.1505	55.6041	29.474	2900097C17Rik	2	156388065	156392979	-	4915	lincRNA	RIKEN cDNA 2900097C17 gene [Source:MGI Symbol;Acc:MGI:1914767]	-
ENSMUSG00000024190	137.254	17.2478	99.9037	29.4804	23.7585	19.9699	22.7006	34.4763	41.2063	19.6398	25.2461	26.078	15.3781	12.4334	31.2191	12.8312	45.4376	21.0018	Dusp1	17	26505590	26508519	-	2697	protein_coding	dual specificity phosphatase 1 [Source:MGI Symbol;Acc:MGI:105120]	-
ENSMUSG00000061684	39.5901	39.8741	27.7221	22.1883	43.0663	41.8817	21.1539	45.9986	21.07	70.1699	39.3535	29.3095	48.1719	30.6397	29.9709	29.1354	28.3425	27.6211	Rpl21-ps8	18	82523544	82524021	-	478	processed_pseudogene	ribosomal protein L21, pseudogene 8 [Source:MGI Symbol;Acc:MGI:3648345]	-
ENSMUSG00000026223	26.0645	36.8559	19.649	54.8984	33.6769	18.1993	17.3491	23.9987	37.7476	27.7298	36.368	36.6628	39.0353	40.5445	54.7907	48.5989	32.0881	50.7775	Itm2c	1	85894281	85908675	+	2491	protein_coding	integral membrane protein 2C [Source:MGI Symbol;Acc:MGI:1927594]	-
ENSMUSG00000020315	9.55213	55.4957	12.4621	46.341	54.3181	65.3099	54.6947	55.3835	20.5939	24.3487	36.0755	15.9448	15.2177	29.1231	25.6908	22.7617	63.1647	26.5156	Sptbn1	11	30099395	30268175	-	17492	protein_coding	spectrin beta, non-erythrocytic 1 [Source:MGI Symbol;Acc:MGI:98388]	-
ENSMUSG00000030541	5.11263	23.917	1.29159	29.4449	31.9665	41.7218	22.4792	30.708	48.8128	39.1375	32.1064	33.4634	43.5216	42.4306	55.8695	71.89	26.6976	51.7872	Idh2	7	80094846	80115392	-	2588	protein_coding	isocitrate dehydrogenase 2 (NADP+), mitochondrial [Source:MGI Symbol;Acc:MGI:96414]	-
ENSMUSG00000020444	36.2208	41.9587	30.4467	35.0353	40.4493	38.2195	51.1032	38.9301	26.4964	46.3299	45.2185	16.4798	29.8589	36.9454	25.3615	29.6351	33.7602	28.8245	Guk1	11	59183875	59192212	-	1835	protein_coding	guanylate kinase 1 [Source:MGI Symbol;Acc:MGI:95871]	-
ENSMUSG00000040731	37.9993	38.4493	57.335	35.4189	31.374	34.5988	39.376	34.8215	28.5448	35.3569	40.8522	20.6054	34.5717	33.7382	27.0521	30.6603	40.0478	30.1052	Eif4h	5	134619721	134639490	-	5551	protein_coding	eukaryotic translation initiation factor 4H [Source:MGI Symbol;Acc:MGI:1341822]	-
ENSMUSG00000021760	16.002	23.859	0	36.0446	23.4239	16.5145	25.1124	25.1089	63.4604	24.7167	33.9167	31.321	48.1123	62.4764	61.1872	68.4577	24.4442	46.271	Gpx8	13	113042753	113046410	-	1048	protein_coding	glutathione peroxidase 8 (putative) [Source:MGI Symbol;Acc:MGI:1916840]	-
ENSMUSG00000028656	38.0893	35.4036	63.8241	25.6353	39.9697	39.1836	41.8636	32.1215	21.1964	35.6898	30.5522	32.7941	26.9761	40.2289	21.127	27.6252	52.6977	24.3868	Cap1	4	122859047	122886056	-	3494	protein_coding	CAP, adenylate cyclase-associated protein 1 (yeast) [Source:MGI Symbol;Acc:MGI:88262]	-
ENSMUSG00000065990	33.1057	37.7743	51.7132	28.7943	40.771	28.0842	34.0404	33.251	30.8748	46.4477	45.2209	26.3143	38.4089	31.7093	31.7443	34.3435	27.2684	29.2816	Aurkaip1	4	155831272	155833130	+	1766	protein_coding	aurora kinase A interacting protein 1 [Source:MGI Symbol;Acc:MGI:1913327]	-
ENSMUSG00000020644	81.2185	31.6583	109.538	27.8746	36.074	29.4022	31.0209	30.895	21.6167	27.1067	36.3066	17.4216	29.4435	23.0506	26.6538	14.4663	31.9269	22.9488	Id2	12	25093799	25097140	-	2438	protein_coding	inhibitor of DNA binding 2 [Source:MGI Symbol;Acc:MGI:96397]	bHLH
ENSMUSG00000038374	89.872	56.4666	59.003	40.2196	54.4707	55.4395	23.2653	24.8566	23.846	31.3498	28.5371	17.2423	19.9546	21.8497	22.8537	20.7401	19.1924	19.3925	Rbm8a	3	96629933	96633791	+	3215	protein_coding	RNA binding motif protein 8a [Source:MGI Symbol;Acc:MGI:1913129]	-
ENSMUSG00000050608	35.154	37.0463	24.9032	25.0944	40.1471	44.7336	35.9056	40.4481	31.4208	45.5035	41.8895	27.6753	34.1263	32.5363	30.0991	37.686	34.152	29.5088	Minos1	4	139101814	139131113	-	2766	protein_coding	mitochondrial inner membrane organizing system 1 [Source:MGI Symbol;Acc:MGI:1913628]	-
ENSMUSG00000046432	42.8515	39.0805	38.4028	38.2631	32.0831	47.2561	36.5861	48.5528	33.7298	31.0589	55.5082	38.4242	18.6042	15.7333	31.6073	27.3871	27.9739	24.8769	Bex3	X	136270253	136271978	+	973	protein_coding	brain expressed X-linked 3 [Source:MGI Symbol;Acc:MGI:1338016]	-
ENSMUSG00000050912	57.7016	29.4387	40.3181	29.6977	31.5834	32.8191	34.3502	33.2022	32.3946	33.5937	32.4796	57.0489	39.1507	23.0423	31.1932	24.3754	35.0191	29.779	Tmem123	9	7764041	7794333	+	3109	protein_coding	transmembrane protein 123 [Source:MGI Symbol;Acc:MGI:1919179]	-
ENSMUSG00000038646	47.0135	42.1104	28.2507	28.3524	47.5183	42.657	37.6321	45.7489	25.7826	29.089	39.0427	17.3928	24.6988	27.3304	35.4275	28.9497	53.905	24.2251	Rammet	7	81762925	81769491	+	1741	protein_coding	RNMT actvating mRNA cap methylating subunit [Source:MGI Symbol;Acc:MGI:1914398]	-
ENSMUSG00000030017	53.4196	0	6.77653	0.446722	1.41724	5.86526	5.50389	3.75933	4.18919	0.54982	28.005	514.268	0	0	0	0	0.582597	0.0192761	Reg3g	6	78466269	78468872	-	2114	protein_coding	regenerating islet-derived 3 gamma [Source:MGI Symbol;Acc:MGI:109406]	-
ENSMUSG00000090509	42.3986	59.2222	26.1865	47.9382	43.2905	28.2124	35.4904	37.437	33.4489	41.1671	62.861	4.09326	16.1085	21.683	36.6068	31.9503	18.8431	37.0314	Sfta2	17	35601549	35650571	+	1085	protein_coding	surfactant associated 2 [Source:MGI Symbol;Acc:MGI:3643293]	-
ENSMUSG00000032381	54.2213	33.481	59.7862	22.9941	38.5807	41.768	33.1765	32.8286	27.0272	33.6109	33.6907	23.7688	29.5881	34.0438	28.4681	28.8803	43.8016	23.9239	Fam96a	9	66126611	66138955	+	1240	protein_coding	family with sequence similarity 96, member A [Source:MGI Symbol;Acc:MGI:1915500]	-
ENSMUSG00000022051	28.307	46.4565	28.1203	28.3309	48.4359	45.5851	49.7849	48.6019	16.8966	39.1126	41.1797	19.6589	31.5058	24.3685	27.0092	23.9655	49.724	26.1351	Bnip3l	14	66985239	67008877	-	3859	protein_coding	BCL2/adenovirus E1B interacting protein 3-like [Source:MGI Symbol;Acc:MGI:1332659]	-
ENSMUSG00000020088	59.3203	39.2812	36.1012	29.4848	33.8004	49.1421	40.2211	34.7308	31.7113	41.4226	27.6169	25.9303	29.5226	30.3002	22.983	25.8726	36.6848	27.9581	Sar1a	10	61680299	61693297	+	3740	protein_coding	secretion associated Ras related GTPase 1A [Source:MGI Symbol;Acc:MGI:98230]	-
ENSMUSG00000024359	82.2487	32.1078	62.3313	22.0038	22.5394	31.4354	36.3196	24.9951	29.2796	25.0842	26.2684	26.0298	42.5449	31.6016	31.7112	31.463	30.4144	33.4536	Hspa9	18	34937414	34954357	-	3932	protein_coding	heat shock protein 9 [Source:MGI Symbol;Acc:MGI:96245]	-
ENSMUSG00000081684	42.0396	26.2099	44.3952	19.4788	35.2836	29.4339	37.534	33.4388	18.1127	84.3407	54.0387	33.9658	37.037	18.709	28.9354	26.59	23.8781	27.6746	Rps2-ps13	X	52898588	52899469	+	882	processed_pseudogene	ribosomal protein S2, pseudogene 13 [Source:MGI Symbol;Acc:MGI:3705640]	-
ENSMUSG00000026864	63.8483	28.358	38.7582	37.4384	28.2009	28.4031	15.7544	25.975	49.0676	26.1888	30.0451	36.8611	24.1737	45.0997	41.1784	40.7295	19.8619	39.0441	Hspa5	2	34771970	34777547	+	4229	protein_coding	heat shock protein 5 [Source:MGI Symbol;Acc:MGI:95835]	-
ENSMUSG00000032314	14.9243	33.8343	23.0302	23.1985	25.7548	32.3774	39.3276	39.8444	28.2471	24.4318	37.4201	30.6274	49.5507	43.0488	44.9961	54.3092	38.3913	35.531	Etfa	9	55454508	55512243	-	1835	protein_coding	electron transferring flavoprotein, alpha polypeptide [Source:MGI Symbol;Acc:MGI:106092]	-
ENSMUSG00000061032	26.5107	30.4245	25.4357	31.2606	25.0812	36.3051	27.9769	30.8014	26.4346	38.9613	32.0934	33.8168	36.3926	46.0935	41.4785	54.7242	35.8005	38.0142	Rrp1	10	78400384	78413043	-	3337	protein_coding	ribosomal RNA processing 1 homolog (S. cerevisiae) [Source:MGI Symbol;Acc:MGI:1203500]	-
ENSMUSG00000020152	37.2219	41.9741	47.3023	30.1798	47.5247	36.7072	35.6933	36.838	25.7266	29.2909	38.6974	26.6732	27.6144	27.2519	30.7352	26.2402	42.7419	27.0228	Actr2	11	20062304	20112913	-	5204	protein_coding	ARP2 actin-related protein 2 [Source:MGI Symbol;Acc:MGI:1913963]	-
ENSMUSG00000048644	4.69688	12.6897	3.54594	15.6436	20.5733	15.0258	4.1143	15.8828	43.1966	18.3582	19.5198	28.8151	79.9424	99.1871	62.1091	94.6116	24.0835	52.0465	Ctxn1	8	4257660	4259274	-	1212	protein_coding	cortexin 1 [Source:MGI Symbol;Acc:MGI:88566]	-
ENSMUSG00000021771	61.3611	32.6456	61.2795	28.3096	29.5675	21.9912	24.4848	33.3843	32.6246	41.7116	31.87	26.9558	31.064	30.3074	32.7022	31.7057	32.3075	29.744	Vdac2	14	21825238	21845879	+	4769	protein_coding	voltage-dependent anion channel 2 [Source:MGI Symbol;Acc:MGI:106915]	-
ENSMUSG00000013160	29.089	36.9423	43.2777	31.845	36.3839	28.5257	34.6093	32.1593	31.572	28.1528	32.1177	30.6918	51.2143	40.2872	28.6348	39.2062	29.3993	29.3179	Atp6v0d1	8	105524465	105566047	-	1793	protein_coding	ATPase, H+ transporting, lysosomal V0 subunit D1 [Source:MGI Symbol;Acc:MGI:1201778]	-
ENSMUSG00000078429	24.2869	44.9231	28.6996	36.2233	36.5486	39.3974	40.0449	41.0661	30.1775	39.8281	37.0407	21.8098	39.4239	27.8807	33.1632	26.4336	30.4781	33.9186	Ctdsp2	10	126978717	126999975	+	5524	protein_coding	CTD (carboxy-terminal domain, RNA polymerase II, polypeptide A) small phosphatase 2 [Source:MGI Symbol;Acc:MGI:1098748]	-
ENSMUSG00000030873	2.51262	34.5457	3.49117	31.1902	34.4301	35.5147	14.5196	21.799	66.9062	59.6579	41.6386	14.6746	31.9253	37.5021	58.1565	63.3799	20.3943	38.4591	Scnn1b	7	121865038	121918514	+	2633	protein_coding	sodium channel, nonvoltage-gated 1 beta [Source:MGI Symbol;Acc:MGI:104696]	-
ENSMUSG00000024097	42.126	21.4049	19.853	36.6247	32.7385	19.7222	26.8034	27.1998	58.3265	26.5935	33.0162	50.7382	18.3813	32.2193	50.8159	40.7657	28.8582	44.1648	Srsf7	17	80200089	80207305	-	2279	protein_coding	serine/arginine-rich splicing factor 7 [Source:MGI Symbol;Acc:MGI:1926232]	-
ENSMUSG00000074896	111.093	32.0647	59.04	23.1253	26.917	26.4237	50.1669	22.9738	5.97064	24.1694	15.1448	8.58391	56.3194	27.3817	17.0341	13.4397	74.32	15.716	Ifit3	19	34583531	34588731	+	1745	protein_coding	interferon-induced protein with tetratricopeptide repeats 3 [Source:MGI Symbol;Acc:MGI:1101055]	-
ENSMUSG00000068290	37.873	31.7839	34.7141	39.2848	28.1963	26.8976	25.5893	20.5079	28.6216	24.9387	31.8969	32.4313	26.2248	49.4167	46.4531	46.2002	35.3408	41.0624	Ddrgk1	2	130653960	130664659	-	2084	protein_coding	DDRGK domain containing 1 [Source:MGI Symbol;Acc:MGI:1924256]	-
ENSMUSG00000062070	43.4001	18.9636	39.4741	16.9794	34.4551	31.8866	32.2213	29.5522	23.2921	26.4904	24.2227	32.6918	43.1774	42.7333	37.3111	47.7152	43.9076	37.4264	Pgk1	X	106187100	106203699	+	2244	protein_coding	phosphoglycerate kinase 1 [Source:MGI Symbol;Acc:MGI:97555]	-
ENSMUSG00000024067	7.51819	27.4175	14.7923	21.6474	31.0348	29.4155	31.1839	26.1209	46.9723	38.5411	33.0303	28.1846	48.9607	55.8037	43.2667	56.1854	26.3302	38.9006	Dpy30	17	74299474	74323944	-	1146	protein_coding	dpy-30, histone methyltransferase complex regulatory subunit [Source:MGI Symbol;Acc:MGI:1913560]	-
ENSMUSG00000114277	128.678	27.4489	119.38	17.0053	27.2367	57.534	11.333	14.8509	9.4716	26.4164	19.9336	20.0037	25.8508	1.50615	18.7167	19.4568	35.2688	25.1907	Gm48583	13	60641790	60642009	+	220	processed_pseudogene	predicted gene, 48583 [Source:MGI Symbol;Acc:MGI:6098152]	-
ENSMUSG00000024513	54.3804	38.2824	70.6102	35.011	45.8875	43.8028	37.9687	38.3817	19.4501	19.1154	31.2749	17.9889	24.4709	25.2793	24.8093	16.4697	39.3931	22.1752	Mbd2	18	70568189	70626131	+	3214	protein_coding	methyl-CpG binding domain protein 2 [Source:MGI Symbol;Acc:MGI:1333813]	MBD
ENSMUSG00000071654	22.4564	40.2918	23.6168	34.4817	34.1585	25.7069	45.6146	32.5942	31.1055	47.8708	38.7003	32.7768	41.6637	31.1767	33.3723	29.0899	30.7531	28.8049	Uqcc3	19	8880016	8880933	-	829	protein_coding	ubiquinol-cytochrome c reductase complex assembly factor 3 [Source:MGI Symbol;Acc:MGI:2147553]	-
ENSMUSG00000051319	15.5778	37.3884	14.624	29.1483	46.1487	40.0389	36.7064	34.3276	24.2019	66.4183	50.9224	22.8116	32.5973	37.7742	26.915	36.9269	30.9442	17.8279	1500011K16Rik	2	127791388	127792488	-	800	protein_coding	RIKEN cDNA 1500011K16 gene [Source:MGI Symbol;Acc:MGI:1915135]	-
ENSMUSG00000035202	17.5096	14.7545	59.803	3.15102	18.5815	23.9354	18.3246	22.5196	23.489	253.568	44.2824	19.1878	32.2043	15.6279	4.71511	4.11023	11.773	12.9389	Lars2	9	123366927	123462666	+	11089	protein_coding	leucyl-tRNA synthetase, mitochondrial [Source:MGI Symbol;Acc:MGI:2142973]	-
ENSMUSG00000006998	37.6063	37.4338	45.6765	26.5533	36.1647	34.5764	24.8695	29.9372	30.2741	37.7078	45.556	25.7265	33.0634	30.493	35.9243	33.235	26.1694	29.437	Psmd2	16	20651652	20663414	+	4038	protein_coding	proteasome (prosome, macropain) 26S subunit, non-ATPase, 2 [Source:MGI Symbol;Acc:MGI:1096584]	-
ENSMUSG00000084830	75.1588	18.9796	14.4079	27.5546	52.2113	17.0726	35.8227	15.2246	26.4461	47.7143	55.0494	22.7396	48.6288	8.7599	32.5391	30.8374	45.3006	25.7612	Gm14539	X	20581141	20581314	-	174	processed_pseudogene	predicted gene 14539 [Source:MGI Symbol;Acc:MGI:3705371]	-
ENSMUSG00000102460	0.580035	88.4861	0	14.9601	38.6677	9.67771	36.3585	44.7339	10.4744	130.99	77.009	4.77568	36.5736	19.7687	29.7336	12.3305	34.766	9.0832	Gm38197	3	30225573	30227694	-	2122	TEC	predicted gene, 38197 [Source:MGI Symbol;Acc:MGI:5611425]	-
ENSMUSG00000092274	0.318508	13.0601	1.3334	102.27	17.8301	3.15262	3.74778	9.53129	56.4469	5.64384	31.6306	40.8137	38.5195	39.3042	81.2976	62.158	20.8124	70.5834	Neat1	19	5824708	5845478	-	20771	lincRNA	nuclear paraspeckle assembly transcript 1 (non-protein coding) [Source:MGI Symbol;Acc:MGI:1914211]	-
ENSMUSG00000041126	19.1258	38.1929	12.4278	30.6056	42.9672	42.6308	44.8709	38.0139	27.1156	31.3179	40.7768	24.4027	29.5601	32.7497	32.5173	34.9623	44.9504	30.4187	H2afv	11	6427229	6444443	-	1633	protein_coding	H2A histone family, member V [Source:MGI Symbol;Acc:MGI:1924855]	-
ENSMUSG00000060019	64.2094	46.0364	31.2891	19.1862	56.507	14.0615	20.107	42.193	25.0316	56.2413	27.2225	29.4668	28.5254	31.3983	21.0138	33.6694	28.8038	22.593	Gm10073	8	106572966	106573461	-	496	protein_coding	predicted pseudogene 10073 [Source:MGI Symbol;Acc:MGI:3641908]	-
ENSMUSG00000006315	19.6469	26.983	15.7813	33.0229	33.8958	29.1534	39.4866	20.0904	36.6968	41.8101	33.9365	33.5486	31.9336	53.5766	34.3679	48.7407	31.4548	32.5044	Tmem147	7	30727701	30729540	-	1112	protein_coding	transmembrane protein 147 [Source:MGI Symbol;Acc:MGI:1915011]	-
ENSMUSG00000031924	21.9842	38.8726	34.4166	30.9907	43.0203	33.6921	54.5318	34.5418	24.8321	35.4945	39.207	16.6335	35.4073	35.7564	26.6239	31.633	31.7054	27.2409	Cyb5b	8	107150640	107187471	+	4374	protein_coding	cytochrome b5 type B [Source:MGI Symbol;Acc:MGI:1913677]	-
ENSMUSG00000038690	23.362	40.4993	28.1658	24.0498	38.8808	35.1219	41.3533	38.3553	30.8056	42.9429	44.1582	31.9478	39.5031	26.42	27.7776	28.6673	26.9345	27.1417	Atp5j2	5	145183698	145192062	-	3306	protein_coding	ATP synthase, H+ transporting, mitochondrial F0 complex, subunit F2 [Source:MGI Symbol;Acc:MGI:1927558]	-
ENSMUSG00000074743	11.5711	60.3186	4.48917	123.024	36.3171	30.4595	41.2977	60.6472	30.2237	22.523	47.0546	5.06443	11.2519	11.6592	41.0952	15.6106	14.3903	28.8301	Thbd	2	148404466	148408188	-	3723	protein_coding	thrombomodulin [Source:MGI Symbol;Acc:MGI:98736]	-
ENSMUSG00000072620	123.342	24.326	155.682	18.3574	27.298	22.1214	19.6451	17.2997	7.09611	29.2376	19.4884	36.468	12.9209	14.8153	14.7443	6.41293	28.2737	17.2402	Slfn2	11	83065112	83070678	+	1664	protein_coding	schlafen 2 [Source:MGI Symbol;Acc:MGI:1313258]	-
ENSMUSG00000036478	95.7653	20.96	111.777	16.2884	25.5172	20.7837	23.7334	20.9878	24.6185	25.0516	25.1983	40.7341	25.7127	22.3456	27.5598	20.3629	24.6275	22.1203	Btg1	10	96617006	96622809	+	5276	protein_coding	B cell translocation gene 1, anti-proliferative [Source:MGI Symbol;Acc:MGI:88215]	-
ENSMUSG00000047671	0	10.701	4.94282	10.5925	14.8754	7.67274	1.99481	8.98127	42.6691	1.79347	18.5936	36.9584	59.2428	99.7339	51.7334	126.004	30.1528	67.4514	Tctex1d4	4	117126794	117128738	+	1111	protein_coding	Tctex1 domain containing 4 [Source:MGI Symbol;Acc:MGI:3045358]	-
ENSMUSG00000034993	15.6858	51.2372	22.6589	46.1443	28.8612	61.6372	50.0275	42.0443	16.1969	61.0515	39.3027	10.6118	37.8373	24.0069	20.9345	15.1049	25.5583	24.8976	Vat1	11	101458745	101466230	-	2766	protein_coding	vesicle amine transport 1 [Source:MGI Symbol;Acc:MGI:1349450]	-
ENSMUSG00000014077	47.5326	38.6159	46.5714	22.879	33.3111	40.4195	42.1205	34.9021	22.2331	42.6622	33.8398	14.7813	32.2498	27.2545	26.1964	21.7274	42.8019	23.2455	Chp1	2	119547697	119587027	+	3499	protein_coding	calcineurin-like EF hand protein 1 [Source:MGI Symbol;Acc:MGI:1927185]	-
ENSMUSG00000025613	51.5173	37.95	49.7158	23.3128	35.8043	35.0081	29.7394	31.5693	31.9963	33.1769	28.4401	30.2155	35.7785	30.0449	30.9609	25.5759	27.2406	25.0066	Cct8	16	87483326	87495873	-	3088	protein_coding	chaperonin containing Tcp1, subunit 8 (theta) [Source:MGI Symbol;Acc:MGI:107183]	-
ENSMUSG00000064317	57.7576	31.7572	13.1356	13.5179	24.3962	30.513	51.5507	19.718	35.9655	30.0924	75.4426	13.8501	39.7281	43.9659	33.1757	28.8762	19.1318	30.4633	Gm10146	10	78393320	78393628	+	309	processed_pseudogene	predicted gene 10146 [Source:MGI Symbol;Acc:MGI:3704367]	-
ENSMUSG00000059208	41.1391	42.5915	32.7082	30.7203	38.5887	32.7771	34.6802	34.0362	33.2074	34.1558	39.5484	29.1321	25.3907	29.9141	31.2866	27.5474	28.3996	26.9497	Hnrnpm	17	33646233	33686860	-	4701	protein_coding	heterogeneous nuclear ribonucleoprotein M [Source:MGI Symbol;Acc:MGI:1926465]	-
ENSMUSG00000025934	41.0491	22.3074	27.2617	13.8047	25.2963	25.0645	29.2717	28.4178	32.8185	12.3846	24.2818	35.4578	50.0531	42.8531	31.3103	54.5708	46.9792	49.5768	Gsta3	1	21240589	21265661	+	4344	protein_coding	glutathione S-transferase, alpha 3 [Source:MGI Symbol;Acc:MGI:95856]	-
ENSMUSG00000010607	38.8101	34.7306	26.2728	24.1679	24.0061	16.4564	40.8235	33.2981	29.8349	19.6605	44.7064	22.4995	39.989	44.7774	34.5016	48.7276	29.324	38.914	Pigyl	9	22156846	22158358	+	777	protein_coding	phosphatidylinositol glycan anchor biosynthesis, class Y-like [Source:MGI Symbol;Acc:MGI:1913518]	-
ENSMUSG00000083833	47.4623	30.0844	35.5915	15.0401	37.0178	36.9022	59.3634	39.4893	15.4592	18.5641	24.6101	29.7584	26.2777	37.7317	22.6451	30.082	62.218	22.6949	Gm13841	5	115801677	115802159	-	483	processed_pseudogene	predicted gene 13841 [Source:MGI Symbol;Acc:MGI:3650890]	-
ENSMUSG00000009876	21.2819	61.4269	39.3893	78.636	49.0591	27.2084	36.3865	61.2963	31.5119	54.5759	37.0525	6.14839	11.3539	9.50327	17.5271	6.80927	27.508	14.2727	Cox4i2	2	152754173	152765037	+	788	protein_coding	cytochrome c oxidase subunit 4I2 [Source:MGI Symbol;Acc:MGI:2135755]	-
ENSMUSG00000019132	31.0655	34.603	31.9829	30.6771	30.6182	29.2366	32.3966	35.3875	35.2992	29.4107	38.8695	28.9434	31.4823	33.9567	35.3171	33.4274	30.9113	36.9387	BC005537	13	24801657	24816197	+	5849	protein_coding	cDNA sequence BC005537 [Source:MGI Symbol;Acc:MGI:2441726]	-
ENSMUSG00000040824	26.0342	37.3025	20.1094	28.3444	42.4536	32.6101	32.2742	30.0526	32.5006	51.6911	43.6405	31.2601	33.5388	31.1355	30.2279	28.3942	33.0248	25.6047	Snrpd2	7	19149722	19153542	+	2618	protein_coding	small nuclear ribonucleoprotein D2 [Source:MGI Symbol;Acc:MGI:98345]	-
ENSMUSG00000027620	64.8111	19.697	48.7419	40.7301	24.7808	17.7206	17.4888	23.6457	35.8617	10.8052	22.845	37.3344	27.988	34.6427	46.6901	43.9798	32.0935	40.1219	Rbm39	2	156147239	156180238	-	6946	protein_coding	RNA binding motif protein 39 [Source:MGI Symbol;Acc:MGI:2157953]	-
ENSMUSG00000024414	30.4585	30.5578	24.8456	19.5438	31.0054	65.0379	50.6246	44.1961	20.626	60.181	39.6008	17.5434	26.4045	28.4593	18.6375	26.1966	33.7599	22.0917	Mrpl27	11	94653767	94660089	+	985	protein_coding	mitochondrial ribosomal protein L27 [Source:MGI Symbol;Acc:MGI:2137224]	-
ENSMUSG00000078238	61.1273	23.8272	69.9397	19.5674	17.5721	15.6555	34.0457	26.461	22.802	40.8126	18.6513	22.2943	38.9981	31.908	26.4287	44.0494	42.7124	30.8709	Gm12854	4	116067268	116067564	+	297	processed_pseudogene	predicted gene 12854 [Source:MGI Symbol;Acc:MGI:3650410]	-
ENSMUSG00000087590	26.8351	48.7138	34.7034	33.6189	53.268	20.7253	23.8374	60.9904	20.9991	20.8523	46.9671	30.0461	51.775	13.4082	27.8302	18.9279	16.0396	37.7171	Epb41l4aos	18	33794892	33795986	+	430	lincRNA	erythrocyte membrane protein band 4.1 like 4a, opposite strand [Source:MGI Symbol;Acc:MGI:1916999]	-
ENSMUSG00000029304	59.8426	53.304	34.4086	37.7986	48.7924	37.3053	41.3527	73.0854	18.5974	40.6046	21.1482	3.87085	14.0563	12.4257	25.2722	9.62133	42.4487	13.0804	Spp1	5	104435118	104441050	+	1648	protein_coding	secreted phosphoprotein 1 [Source:MGI Symbol;Acc:MGI:98389]	-
ENSMUSG00000020149	55.0377	33.356	52.7295	26.0152	36.5318	32.434	43.3884	38.8866	19.2432	26.2246	34.509	21.2553	29.7031	31.9752	22.9874	27.1847	33.5216	21.9784	Rab1a	11	20201432	20226856	+	3799	protein_coding	RAB1A, member RAS oncogene family [Source:MGI Symbol;Acc:MGI:97842]	-
ENSMUSG00000005881	15.3782	26.5584	5.74104	35.1745	25.0616	27.5244	16.3266	22.4816	45.315	23.5642	23.3421	40.0508	44.5696	50.7731	46.5932	56.3662	30.8919	50.8361	Ergic3	2	156008045	156018279	+	2121	protein_coding	ERGIC and golgi 3 [Source:MGI Symbol;Acc:MGI:1913616]	-
ENSMUSG00000001847	67.6193	29.1713	61.761	22.9112	37.7472	47.5437	39.9277	36.0399	11.7026	28.9546	27.8245	17.4752	23.8488	26.2665	19.1375	21.4685	43.8569	21.7524	Rac1	5	143503634	143528036	-	4496	protein_coding	Rac family small GTPase 1 [Source:MGI Symbol;Acc:MGI:97845]	-
ENSMUSG00000026176	23.858	40.3855	26.8193	35.1017	33.2784	38.8946	37.433	41.4498	25.2344	51.1485	45.4835	20.1751	34.3243	27.1324	27.3642	22.1336	27.8904	25.8871	Ctdsp1	1	74391509	74397285	+	3334	protein_coding	CTD (carboxy-terminal domain, RNA polymerase II, polypeptide A) small phosphatase 1 [Source:MGI Symbol;Acc:MGI:2654470]	-
ENSMUSG00000030403	38.9192	25.7071	115.548	28.7161	26.7006	29.4146	29.746	20.6163	25.5459	28.8058	24.8713	30.7167	26.6081	32.5149	28.0595	22.1389	23.2015	25.6768	Vasp	7	19256929	19271817	-	2617	protein_coding	vasodilator-stimulated phosphoprotein [Source:MGI Symbol;Acc:MGI:109268]	-
ENSMUSG00000020368	37.7342	32.169	27.422	37.7073	34.1444	31.6496	27.0064	26.0411	34.0595	34.6739	38.0666	29.2936	31.8478	32.3657	38.4049	33.4652	22.9369	33.8987	Canx	11	50293961	50325673	-	4693	protein_coding	calnexin [Source:MGI Symbol;Acc:MGI:88261]	-
ENSMUSG00000019432	37.2537	24.0191	30.2	39.1447	31.3469	23.2163	29.4385	22.2682	39.8886	19.7517	26.0828	44.4941	31.8087	34.2302	39.4343	41.834	27.4776	40.1356	Ddx39b	17	35241746	35253707	+	3783	protein_coding	DEAD (Asp-Glu-Ala-Asp) box polypeptide 39B [Source:MGI Symbol;Acc:MGI:99240]	-
ENSMUSG00000022661	92.2848	32.8724	52.6263	30.405	31.6044	30.8019	30.3639	36.1878	22.0391	13.6996	30.6148	11.4522	30.3027	18.1391	33.025	23.2187	27.2578	35.1175	Cd200	16	45382135	45409053	-	3321	protein_coding	CD200 antigen [Source:MGI Symbol;Acc:MGI:1196990]	-
ENSMUSG00000020864	28.1313	41.3568	34.2007	27.8795	49.2659	47.5653	40.7894	31.0045	21.6905	33.8725	28.6952	12.4017	22.1352	31.6167	21.7133	23.2796	65.0973	20.7148	Ankrd40	11	94328001	94341841	+	4255	protein_coding	ankyrin repeat domain 40 [Source:MGI Symbol;Acc:MGI:1918702]	-
ENSMUSG00000086240	75.2427	19.9731	14.3779	10.4724	57.4941	54.2086	51.5638	6.44544	26.9342	42.4204	62.7566	13.409	31.1342	23.4607	23.1682	16.2824	34.1614	17.2516	Gm7846	1	28580499	28580772	-	274	processed_pseudogene	predicted gene 7846 [Source:MGI Symbol;Acc:MGI:3645212]	-
ENSMUSG00000000805	41.2417	37.723	28.6002	96.6983	42.4242	30.877	43.7526	55.2003	18.769	60.0501	30.759	10.8637	14.8166	12.8092	8.53049	8.70906	15.7867	21.349	Car4	11	84957786	84966044	+	1966	protein_coding	carbonic anhydrase 4 [Source:MGI Symbol;Acc:MGI:1096574]	-
ENSMUSG00000028447	48.7255	35.4965	30.8188	27.6423	32.9266	33.7149	36.822	29.5754	23.1639	29.6396	33.7797	28.8666	26.8238	34.7253	20.9934	39.2282	37.1138	28.5873	Dctn3	4	41714798	41723170	-	1042	protein_coding	dynactin 3 [Source:MGI Symbol;Acc:MGI:1859251]	-
ENSMUSG00000023460	58.3866	29.0875	54.5534	28.0827	37.4414	48.7163	48.2267	32.2582	22.0994	18.778	29.5266	13.7111	25.6111	27.5308	22.4008	19.4801	41.744	20.8383	Rab12	17	66494512	66519729	-	3033	protein_coding	RAB12, member RAS oncogene family [Source:MGI Symbol;Acc:MGI:894284]	-
ENSMUSG00000067924	14.7361	47.7139	12.9845	44.459	49.5	46.2326	31.2557	47.8067	26.9913	57.8195	40.8413	11.3717	36.986	27.4334	31.9604	14.6807	16.2948	19.151	Rtl8b	X	53669177	53670408	-	1232	protein_coding	retrotransposon Gag like 8B [Source:MGI Symbol;Acc:MGI:3576504]	-
ENSMUSG00000057411	15.0008	22.6453	25.219	36.2765	20.175	29.5449	21.8161	21.0822	44.8224	62.0596	24.6678	39.2137	32.2505	48.8745	30.8289	45.3673	20.7834	37.0312	Fam173a	17	25790508	25792284	-	800	protein_coding	family with sequence similarity 173, member A [Source:MGI Symbol;Acc:MGI:2384888]	-
ENSMUSG00000049760	37.5094	29.9452	13.9906	20.6622	42.0813	26.5166	36.7318	35.2757	26.8119	52.5551	48.0771	30.9802	20.0533	30.5559	30.4907	33.6771	36.2424	24.9935	2410015M20Rik	17	56607452	56609771	-	1169	protein_coding	RIKEN cDNA 2410015M20 gene [Source:MGI Symbol;Acc:MGI:2442174]	-
ENSMUSG00000045996	53.5039	20.7159	62.3683	26.1355	35.1583	28.7707	19.9781	33.1135	27.1322	44.1724	23.8577	27.7574	32.1216	16.3552	26.3953	30.6275	44.2116	24.2277	Polr2k	15	36174010	36177010	+	624	protein_coding	polymerase (RNA) II (DNA directed) polypeptide K [Source:MGI Symbol;Acc:MGI:102725]	-
ENSMUSG00000051223	63.8231	35.3746	68.9106	26.0098	33.7172	30.6482	28.8501	35.3166	25.8553	18.2391	33.3652	22.725	21.7543	23.8265	25.0676	23.5295	36.1268	22.4714	Bzw1	1	58392898	58407353	+	4033	protein_coding	basic leucine zipper and W2 domains 1 [Source:MGI Symbol;Acc:MGI:1914132]	-
ENSMUSG00000059588	5.89323	67.6067	2.27413	98.9143	43.0772	30.5831	46.3039	64.4634	27.0855	25.951	37.7512	4.48237	14.5048	14.3889	29.9685	13.3371	21.2668	27.2026	Calcrl	2	84330626	84425411	-	4882	protein_coding	calcitonin receptor-like [Source:MGI Symbol;Acc:MGI:1926944]	-
ENSMUSG00000054766	54.0569	31.8537	44.3201	21.2666	30.0388	37.7953	26.4777	26.3606	28.4575	44.0613	30.0846	31.8135	28.85	29.5205	27.2109	25.3894	31.0475	25.9416	Set	2	30057378	30072577	+	4070	protein_coding	SET nuclear oncogene [Source:MGI Symbol;Acc:MGI:1860267]	-
ENSMUSG00000022841	24.2731	31.2152	21.2102	28.9606	42.8106	37.2426	35.9062	34.9352	26.7213	41.2293	38.7951	27.194	35.6543	32.2667	31.3156	25.7105	29.6842	29.3259	Ap2m1	16	20535478	20544909	+	4120	protein_coding	adaptor-related protein complex 2, mu 1 subunit [Source:MGI Symbol;Acc:MGI:1298405]	-
ENSMUSG00000023456	20.7896	34.9249	12.402	25.0678	24.5741	41.7546	31.245	26.2053	30.4023	36.0077	36.7635	36.7227	40.762	35.9156	28.8858	40.667	37.1317	32.6974	Tpi1	6	124810586	124814296	-	2753	protein_coding	triosephosphate isomerase 1 [Source:MGI Symbol;Acc:MGI:98797]	-
ENSMUSG00000027706	33.6191	52.2073	24.6017	43.6984	37.1187	21.8287	21.1456	34.036	25.3492	29.8599	45.014	20.8612	21.9422	33.3413	32.8384	34.538	30.3436	30.5505	Sec62	3	30792875	30821263	+	4343	protein_coding	SEC62 homolog (S. cerevisiae) [Source:MGI Symbol;Acc:MGI:1916526]	-
ENSMUSG00000084093	27.8917	64.0073	11.8682	31.4365	16.3903	31.723	9.72032	30.9834	29.4488	33.986	25.6455	11.8054	59.6217	49.9936	30.3508	44.7759	43.2144	19.0641	Gm16418	1	166431705	166431875	-	171	processed_pseudogene	predicted pseudogene 16418 [Source:MGI Symbol;Acc:MGI:3644548]	-
ENSMUSG00000044786	118.605	17.0221	92.5108	20.1288	15.7642	17.3451	21.1963	30.4606	49.2414	18.71	17.3273	17.93	28.222	16.5199	28.7268	15.7411	28.1105	18.214	Zfp36	7	28376784	28380253	-	3470	protein_coding	zinc finger protein 36 [Source:MGI Symbol;Acc:MGI:99180]	-
ENSMUSG00000067925	8.11115	64.5882	9.39055	44.103	30.9754	40.0984	46.7125	60.8881	25.5747	44.4641	45.1962	5.54093	31.9792	32.6639	26.0585	14.1767	22.1587	18.8573	Rtl8a	X	53642488	53643682	-	1195	protein_coding	retrotransposon Gag like 8A [Source:MGI Symbol;Acc:MGI:1913408]	-
ENSMUSG00000066116	41.7232	27.7203	36.0837	17.4427	30.3044	33.5664	46.9541	33.6747	13.98	61.9153	32.6002	26.4601	21.7472	22.0902	17.8113	21.9696	62.9721	21.8712	Gm10154	4	83505185	83505538	-	354	processed_pseudogene	predicted gene 10154 [Source:MGI Symbol;Acc:MGI:3642271]	-
ENSMUSG00000029864	15.2912	25.4355	13.9778	21.7338	22.8294	34.0259	25.3645	35.0445	54.1979	24.8673	25.7677	18.6344	34.4183	43.5338	45.5495	54.461	26.1581	49.0437	Gstk1	6	42245935	42250447	+	1469	protein_coding	glutathione S-transferase kappa 1 [Source:MGI Symbol;Acc:MGI:1923513]	-
ENSMUSG00000090553	9.5318	26.5461	62.3003	24.197	31.7694	14.7797	32.2057	33.2744	27.7808	47.9257	47.6928	35.2541	33.1109	30.9134	37.0776	28.4307	13.3754	33.1462	Snrpe	1	133603871	133610291	-	1372	protein_coding	small nuclear ribonucleoprotein E [Source:MGI Symbol;Acc:MGI:98346]	-
ENSMUSG00000053310	25.3071	18.7672	26.9488	18.9984	54.2764	15.6447	51.4782	28.8062	11.9509	31.8835	22.3185	11.3093	81.671	42.1431	24.3244	18.4227	43.9073	40.6094	Nrgn	9	37544492	37552904	-	1453	protein_coding	neurogranin [Source:MGI Symbol;Acc:MGI:1927184]	-
ENSMUSG00000022964	15.7251	38.7298	8.54108	36.1289	34.9287	20.6991	39.074	32.0575	34.7505	30.005	29.8184	21.4417	22.4854	49.7707	39.017	49.074	27.1901	38.967	Tmem50b	16	91574503	91597800	-	2446	protein_coding	transmembrane protein 50B [Source:MGI Symbol;Acc:MGI:1925225]	-
ENSMUSG00000001056	86.7277	35.1569	54.1689	15.7205	17.7101	29.4155	33.4804	18.4156	27.1227	26.0805	33.131	29.4529	17.2482	34.9279	23.093	34.9843	26.5452	24.1084	Nhp2	11	51619735	51623714	+	1146	protein_coding	NHP2 ribonucleoprotein [Source:MGI Symbol;Acc:MGI:1098547]	-
ENSMUSG00000052837	83.0453	13.4091	97.382	20.6629	20.2029	10.7772	36.1787	25.7885	40.374	14.7933	18.6072	19.459	45.6646	21.7734	26.5072	15.2229	37.6816	19.4273	Junb	8	84974484	84978718	-	2301	protein_coding	jun B proto-oncogene [Source:MGI Symbol;Acc:MGI:96647]	TF_bZIP
ENSMUSG00000048277	20.5312	35.8615	27.8956	39.042	23.1277	18.2537	18.4062	20.9321	36.6651	24.963	42.2371	50.0134	27.7658	34.3293	44.6072	39.887	21.9831	40.176	Syngr2	11	117809668	117814283	+	1776	protein_coding	synaptogyrin 2 [Source:MGI Symbol;Acc:MGI:1328324]	-
ENSMUSG00000049124	67.7597	22	12.6802	11.6682	17.5266	43.4988	105.86	19.9024	12.5961	146.688	20.6294	17.0493	12.9368	13.7348	12.1121	10.4646	10.2102	7.60096	Gm8186	17	26098872	26099257	-	386	protein_coding	predicted gene 8186 [Source:MGI Symbol;Acc:MGI:3643110]	-
ENSMUSG00000026576	27.6648	22.0806	11.3917	26.2541	17.8487	19.7447	8.63187	18.9732	40.9739	13.9584	26.7817	47.4508	25.2797	46.1377	54.0575	77.0585	20.4669	59.7026	Atp1b1	1	164437109	164458355	-	3081	protein_coding	ATPase, Na+/K+ transporting, beta 1 polypeptide [Source:MGI Symbol;Acc:MGI:88108]	-
ENSMUSG00000028441	2.38198	17.5962	2.77237	11.0423	14.7588	13.6338	6.7259	10.0047	51.1407	6.77738	20.7907	31.5381	54.7623	83.8059	59.4034	100.085	28.4284	47.4886	1110017D15Rik	4	41505009	41517333	-	1421	protein_coding	RIKEN cDNA 1110017D15 gene [Source:MGI Symbol;Acc:MGI:1920971]	-
ENSMUSG00000059775	5.48256	7.14496	69.6604	15.3701	62.2068	43.7238	72.188	9.83325	14.6961	42.5284	31.3572	8.6324	45.5679	46.9355	15.3801	11.279	40.8708	20.1479	Rps26-ps1	8	107439131	107439579	-	449	transcribed_processed_pseudogene	ribosomal protein S26, pseudogene 1 [Source:MGI Symbol;Acc:MGI:3704322]	-
ENSMUSG00000024997	14.7817	42.4536	38.0432	27.6961	27.333	32.1584	36.9247	32.7998	26.8458	37.7479	35.7614	23.6292	18.7233	35.4669	31.4873	34.1827	33.1651	33.2779	Prdx3	19	60864051	60874556	-	1478	protein_coding	peroxiredoxin 3 [Source:MGI Symbol;Acc:MGI:88034]	-
ENSMUSG00000051669	22.2684	24.9684	12.8281	40.9949	27.1288	20.0157	8.40403	16.2017	44.3001	24.5184	31.9725	33.0256	41.8772	36.7201	57.4407	52.2239	13.5045	53.6477	AU021092	16	5211823	5222299	-	1368	protein_coding	expressed sequence AU021092 [Source:MGI Symbol;Acc:MGI:2146559]	-
ENSMUSG00000036598	0.836165	20.0725	0	11.8723	25.3622	2.50695	4.83941	14.26	52.1073	9.28206	23.3856	27.491	81.3639	67.1967	73.1303	77.8886	28.3041	41.7304	Ccdc113	8	95534085	95558890	+	1288	protein_coding	coiled-coil domain containing 113 [Source:MGI Symbol;Acc:MGI:3606076]	-
ENSMUSG00000025144	18.1425	36.0076	9.86519	25.7322	33.2923	45.4511	42.3132	33.9436	34.2616	31.9141	40.0756	24.6295	33.4866	37.5964	24.2539	36.0501	25.9587	28.642	Cenpx	11	120710942	120713738	-	1077	protein_coding	centromere protein X [Source:MGI Symbol;Acc:MGI:894324]	-
ENSMUSG00000015749	45.3021	37.0437	46.1651	21.9093	32.875	49.1857	42.4944	38.5798	16.7024	28.916	25.2751	17.4246	19.8187	27.7831	26.4138	18.7325	42.8957	23.9287	Anp32e	3	95929246	95947390	+	3566	protein_coding	acidic (leucine-rich) nuclear phosphoprotein 32 family, member E [Source:MGI Symbol;Acc:MGI:1913721]	-
ENSMUSG00000070319	50.7161	33.5761	58.1856	23.287	23.1387	26.756	30.7888	19.8058	23.7188	42.9342	25.5938	29.9756	32.2309	32.7679	21.403	31.5422	28.0588	26.8651	Eif3g	9	20894349	20898623	-	1984	protein_coding	eukaryotic translation initiation factor 3, subunit G [Source:MGI Symbol;Acc:MGI:1858258]	-
ENSMUSG00000039067	48.0412	24.0375	42.0813	15.3256	29.1521	30.8471	34.9809	28.8223	24.5378	48.6901	31.0843	23.0711	26.9939	34.8206	24.6428	31.091	37.9124	24.7273	Psmd7	8	107580381	107588464	-	2261	protein_coding	proteasome (prosome, macropain) 26S subunit, non-ATPase, 7 [Source:MGI Symbol;Acc:MGI:1351511]	-
ENSMUSG00000020571	30.7709	32.9804	8.44744	38.2035	31.2779	28.6941	12.2795	23.5316	37.7199	34.761	47.6102	24.6451	41.2987	40.2932	37.9904	37.7187	20.7187	31.6965	Pdia6	12	17266545	17284770	+	3745	protein_coding	protein disulfide isomerase associated 6 [Source:MGI Symbol;Acc:MGI:1919103]	-
ENSMUSG00000072704	39.266	42.1032	24.9032	26.981	43.3145	40.2882	43.0262	38.4813	19.7248	28.4139	36.6752	17.3052	23.9626	27.4759	24.0466	24.1312	38.7387	20.3084	Smim10l1	6	133104909	133110899	+	3068	protein_coding	small integral membrane protein 10 like 1 [Source:MGI Symbol;Acc:MGI:1914379]	-
ENSMUSG00000055093	53.2447	29.0479	32.1895	19.202	40.4233	38.6651	32.6436	35.0586	26.729	20.0947	53.1695	19.2872	26.6527	29.266	37.7927	11.6482	33.9935	19.5529	Gm8430	6	122456904	122457374	+	471	processed_pseudogene	predicted pseudogene 8430 [Source:MGI Symbol;Acc:MGI:3645406]	-
ENSMUSG00000022010	30.0045	28.3465	16.6181	26.7467	36.4385	28.046	28.1834	31.3978	35.1192	28.1912	27.536	24.0029	44.587	31.8753	34.5562	32.2626	33.796	40.7224	Tsc22d1	14	76414961	76507765	+	8994	protein_coding	TSC22 domain family, member 1 [Source:MGI Symbol;Acc:MGI:109127]	TSC22
ENSMUSG00000016382	29.7326	32.0604	29.9436	34.6849	31.7898	31.6952	30.1673	32.6707	35.4422	16.4557	33.9298	17.2244	24.3678	28.0688	44.1677	36.6883	30.921	37.9035	Pls3	X	75785654	75875182	-	4238	protein_coding	plastin 3 (T-isoform) [Source:MGI Symbol;Acc:MGI:104807]	-
ENSMUSG00000062963	24.6018	28.7169	30.3352	23.0039	40.7596	32.3831	30.781	32.8042	28.8991	33.7706	35.1789	24.8098	33.4718	30.8942	30.4806	34.95	28.916	32.4816	Ufc1	1	171288563	171295024	-	2070	protein_coding	ubiquitin-fold modifier conjugating enzyme 1 [Source:MGI Symbol;Acc:MGI:1913405]	-
ENSMUSG00000024387	34.835	30.3563	34.6531	27.114	29.5036	37.9288	34.1763	27.9817	28.395	29.8834	32.4942	28.8501	26.3398	39.9804	27.9102	30.6257	30.8647	24.9781	Csnk2b	17	35116196	35122053	-	2067	protein_coding	casein kinase 2, beta polypeptide [Source:MGI Symbol;Acc:MGI:88548]	-
ENSMUSG00000035042	29.9696	10.9099	21.5132	21.7931	24.5643	8.8796	19.0458	17.0166	4.34115	9.51304	7.93408	242.835	22.2517	23.0566	8.35509	9.98533	58.8863	15.7056	Ccl5	11	83525778	83530518	-	960	protein_coding	chemokine (C-C motif) ligand 5 [Source:MGI Symbol;Acc:MGI:98262]	-
ENSMUSG00000036241	25.9301	43.9004	34.0841	28.128	41.3672	47.0506	31.446	29.0688	20.8922	37.3791	39.5886	16.9247	30.1994	28.6661	25.0965	21.5595	31.9295	22.8408	Ube2r2	4	41135743	41193380	+	4189	protein_coding	ubiquitin-conjugating enzyme E2R 2 [Source:MGI Symbol;Acc:MGI:1914865]	-
ENSMUSG00000045394	42.3854	18.4086	37.7451	21.5795	21.6033	20.5133	7.94422	11.4707	45.8375	30.1975	26.4186	35.011	25.4645	43.6281	43.4811	59.8455	17.2063	46.8021	Epcam	17	87635979	87651106	+	2040	protein_coding	epithelial cell adhesion molecule [Source:MGI Symbol;Acc:MGI:106653]	-
ENSMUSG00000001017	48.521	32.0918	45.5921	22.8298	29.3367	29.7592	39.5321	29.1833	24.9942	20.3163	25.099	28.2299	30.454	35.6407	26.0397	28.4785	29.9013	27.1141	Chtop	3	90498956	90509498	-	3637	protein_coding	chromatin target of PRMT1 [Source:MGI Symbol;Acc:MGI:1913761]	-
ENSMUSG00000022205	57.9792	25.2095	34.3863	17.7728	24.3952	35.6252	32.9193	27.8838	36.2094	24.759	30.246	23.9576	32.9308	28.6667	29.6536	33.6267	28.9256	27.6952	Sub1	15	11981339	11996983	-	3930	protein_coding	SUB1 homolog (S. cerevisiae) [Source:MGI Symbol;Acc:MGI:104811]	PC4
ENSMUSG00000046470	5.31842	54.8078	25.8656	77.0832	45.4596	22.0844	43.2644	48.6754	19.294	53.6061	36.6873	7.52659	26.2439	16.8131	19.1163	10.9041	20.5268	19.268	Sox18	2	181669836	181671640	-	1620	protein_coding	SRY (sex determining region Y)-box 18 [Source:MGI Symbol;Acc:MGI:103559]	HMG
ENSMUSG00000001948	10.0056	15.2072	3.03794	12.1529	21.6794	9.61684	10.4441	16.6452	39.77	17.2149	26.3223	29.1488	73.0819	66.333	54.5352	76.8242	23.5643	46.3954	Spa17	9	37603290	37613722	-	1061	protein_coding	sperm autoantigenic protein 17 [Source:MGI Symbol;Acc:MGI:1333778]	-
ENSMUSG00000022941	8.84336	71.4292	19.7277	38.1961	52.0793	51.292	44.7843	35.9901	18.2606	51.0826	39.7999	3.48101	30.7141	17.7472	20.4236	6.14308	26.7881	13.4945	Ripply3	16	94328420	94336935	+	1531	protein_coding	ripply transcriptional repressor 3 [Source:MGI Symbol;Acc:MGI:2181192]	-
ENSMUSG00000031431	40.156	33.0603	66.6338	16.0901	40.8983	31.2704	10.1788	35.5773	30.9011	33.4692	38.1227	30.6831	22.2399	12.5183	25.8185	16.3881	34.8119	31.3061	Tsc22d3	X	140539528	140600659	-	4341	protein_coding	TSC22 domain family, member 3 [Source:MGI Symbol;Acc:MGI:1196284]	TSC22
ENSMUSG00000084786	26.9733	30.69	27.573	19.9624	31.7696	30.9487	41.3786	30.3254	29.5168	47.1612	35.2737	22.9347	44.2974	25.2623	19.356	29.3447	32.85	24.3463	Ubl5	9	20642878	20647140	+	3468	protein_coding	ubiquitin-like 5 [Source:MGI Symbol;Acc:MGI:1913427]	-
ENSMUSG00000056076	43.4066	29.3275	50.3422	27.9959	29.8663	29.2979	26.0388	22.4583	26.1559	32.5045	33.0073	25.5568	29.0607	33.9473	24.7663	29.0093	28.6369	28.5223	Eif3b	5	140419328	140443360	+	3346	protein_coding	eukaryotic translation initiation factor 3, subunit B [Source:MGI Symbol;Acc:MGI:106478]	-
ENSMUSG00000044772	0	9.05509	1.25156	7.61588	16.2896	5.83294	8.82472	15.1681	43.9717	6.29367	17.2176	36.2719	80.2627	83.7467	54.0652	93.5935	26.8173	43.5429	Sntn	14	13670876	13683148	+	1240	protein_coding	sentan, cilia apical structure protein [Source:MGI Symbol;Acc:MGI:3045373]	-
ENSMUSG00000041560	26.9555	28.8193	34.5385	26.2855	32.6342	37.8039	40.7947	33.3057	17.0622	27.4081	29.2187	32.755	33.3889	26.3566	23.5479	30.591	40.3387	27.4983	Nop53	7	15936183	15946074	-	3847	protein_coding	NOP53 ribosome biogenesis factor [Source:MGI Symbol;Acc:MGI:2154441]	-
ENSMUSG00000001123	46.3651	46.1402	37.0932	22.1977	30.3914	50.8291	34.8069	44.9984	10.4821	57.8868	34.076	15.0578	33.7854	21.1805	12.9259	10.8334	25.9347	14.1108	Lgals9	11	78962974	78984946	-	2137	protein_coding	lectin, galactose binding, soluble 9 [Source:MGI Symbol;Acc:MGI:109496]	-
ENSMUSG00000010358	26.5481	24.9684	37.2587	25.0909	21.0417	23.8572	31.4405	16.0039	26.3435	13.076	17.9088	27.2124	60.3199	54.3365	36.5591	53.0276	19.469	34.3552	Ifi35	11	101448407	101458698	+	1727	protein_coding	interferon-induced protein 35 [Source:MGI Symbol;Acc:MGI:1917360]	-
ENSMUSG00000002980	13.3222	32.7693	19.1067	86.405	22.6888	14.5348	14.5919	27.824	25.5394	26.7313	29.7621	22.7682	53.6592	27.4902	35.7191	27.6284	18.0179	50.0994	Bcam	7	19756131	19771016	-	3199	protein_coding	basal cell adhesion molecule [Source:MGI Symbol;Acc:MGI:1929940]	-
ENSMUSG00000071180	16.0265	33.9304	38.0631	24.1817	40.3569	39.5429	33.0603	39.2323	28.8624	28.1255	31.7259	22.2352	34.4895	32.6551	25.3897	25.2022	33.4676	20.4486	Smim15	13	108044446	108049172	+	2208	protein_coding	small integral membrane protein 15 [Source:MGI Symbol;Acc:MGI:1922866]	-
ENSMUSG00000006299	10.9451	40.2744	19.2292	34.0006	32.6999	26.6309	28.0394	24.6675	31.2844	43.6962	41.6498	22.966	35.42	31.4871	36.9138	30.3187	25.5725	30.8627	Aamp	1	74279840	74284738	-	3458	protein_coding	angio-associated migratory protein [Source:MGI Symbol;Acc:MGI:107809]	-
ENSMUSG00000029649	38.1096	33.9904	31.4928	23.5647	30.5911	35.8799	34.7083	29.5075	27.4318	31.8657	34.7807	20.2104	32.1914	29.1331	30.1875	28.5147	28.1693	25.945	Pomp	5	147860461	147876456	+	5216	protein_coding	proteasome maturation protein [Source:MGI Symbol;Acc:MGI:1913787]	-
ENSMUSG00000002778	20.4428	22.1036	20.8947	32.4649	26.766	27.2927	25.7959	31.0991	37.2959	28.708	36.0871	25.9396	36.8985	36.7423	39.3905	34.0049	24.9739	39.1187	Kdelr1	7	45872772	45883732	+	1874	protein_coding	KDEL (Lys-Asp-Glu-Leu) endoplasmic reticulum protein retention receptor 1 [Source:MGI Symbol;Acc:MGI:1915387]	-
ENSMUSG00000053898	12.2599	29.2486	8.67647	24.0291	25.9388	27.1435	37.479	36.9216	29.7266	29.0798	35.5208	37.7229	40.8422	37.3715	29.559	39.2247	35.4276	29.349	Ech1	7	28825217	28832247	+	2284	protein_coding	enoyl coenzyme A hydratase 1, peroxisomal [Source:MGI Symbol;Acc:MGI:1858208]	-
ENSMUSG00000024360	114.115	22.6158	85.7771	15.1007	18.5007	25.1421	25.3203	20.9031	17.6736	22.1603	20.6913	19.6593	18.718	27.6053	19.9139	24.7397	25.1369	20.8747	Etf1	18	34902785	34932007	-	3709	protein_coding	eukaryotic translation termination factor 1 [Source:MGI Symbol;Acc:MGI:2385071]	-
ENSMUSG00000029247	21.37	27.8949	20.4608	26.1508	37.9628	38.2659	39.4054	35.8949	27.7424	22.7989	34.1178	27.7952	25.3649	23.2232	34.5845	33.4959	36.2538	30.6758	Paics	5	76951307	76967509	+	3139	protein_coding	phosphoribosylaminoimidazole carboxylase, phosphoribosylaminoribosylaminoimidazole, succinocarboxamide synthetase [Source:MGI Symbol;Acc:MGI:1914304]	-
ENSMUSG00000024404	136.666	17.1392	107.282	15.1598	24.0494	22.5083	31.8194	21.2737	9.96058	11.1574	18.3462	15.2852	14.6062	18.3552	13.8366	14.4094	34.4824	16.8074	Riok3	18	12128850	12157367	+	3661	protein_coding	RIO kinase 3 [Source:MGI Symbol;Acc:MGI:1914128]	-
ENSMUSG00000015839	75.7518	23.3652	43.8712	25.5287	28.2607	25.6546	22.1857	22.9596	32.5015	11.8979	23.1053	22.1017	30.6218	30.4118	35.1524	34.1944	22.6466	32.9024	Nfe2l2	2	75675513	75704641	-	3796	protein_coding	nuclear factor, erythroid derived 2, like 2 [Source:MGI Symbol;Acc:MGI:108420]	TF_bZIP
ENSMUSG00000021486	36.9115	31.048	37.1803	25.356	28.5047	30.4653	45.1722	36.5066	22.072	39.41	28.576	26.5707	27.3505	28.103	23.0826	27.3135	28.1924	20.9129	Prelid1	13	55320500	55325272	+	2726	protein_coding	PRELI domain containing 1 [Source:MGI Symbol;Acc:MGI:1913744]	-
ENSMUSG00000027642	26.256	27.1991	10.887	36.3137	29.6048	17.7264	19.6672	23.4211	39.2762	26.5748	32.9542	27.5421	37.0263	35.1249	39.097	52.8582	19.7391	40.4276	Rpn2	2	157279017	157326319	+	4430	protein_coding	ribophorin II [Source:MGI Symbol;Acc:MGI:98085]	-
ENSMUSG00000040938	1.50601	8.97745	1.16856	16.4259	9.34678	8.64761	12.3112	6.53453	59.4911	4.03087	17.1255	70.0783	47.6584	51.8177	50.2819	100.442	16.1064	59.5608	Slc16a11	11	70212752	70216417	+	2554	protein_coding	solute carrier family 16 (monocarboxylic acid transporters), member 11 [Source:MGI Symbol;Acc:MGI:2663709]	-
ENSMUSG00000020736	18.0846	32.0312	31.1016	35.0156	39.1673	46.4515	28.3104	19.597	16.6792	37.5788	28.75	43.739	32.7919	20.8113	25.9236	23.5338	36.3001	25.3076	Nt5c	11	115490420	115491862	-	1140	protein_coding	5',3'-nucleotidase, cytosolic [Source:MGI Symbol;Acc:MGI:1354954]	-
ENSMUSG00000059734	11.8227	31.6478	17.1074	25.6479	34.6241	22.264	53.3634	28.5172	23.5315	27.0708	47.0967	40.2067	24.6311	27.8708	21.2458	37.8135	40.1584	25.5161	Ndufs8	19	3908870	3912717	-	963	protein_coding	NADH:ubiquinone oxidoreductase core subunit S8 [Source:MGI Symbol;Acc:MGI:2385079]	-
ENSMUSG00000079037	44.1929	27.5858	22.0111	39.4689	21.4907	17.1439	17.8538	27.0975	27.3476	23.7411	39.5026	35.8769	25.1019	30.9715	38.6636	41.1446	16.453	44.4367	Prnp	2	131909928	131938429	+	2343	protein_coding	prion protein [Source:MGI Symbol;Acc:MGI:97769]	-
ENSMUSG00000028398	16.6105	40.62	38.3433	26.4204	38.476	32.0716	16.2628	34.5584	29.644	27.3382	36.5994	28.5509	16.0052	30.4075	28.4792	27.6629	46.871	24.6367	Dmac1	4	75277354	75278305	-	741	protein_coding	distal membrane arm assembly complex 1 [Source:MGI Symbol;Acc:MGI:1914178]	-
ENSMUSG00000024782	16.421	31.724	21.1211	23.388	34.3219	32.4964	44.0405	33.4531	28.4679	30.1224	32.92	25.1823	29.4096	36.1939	30.4646	30.6082	31.0666	27.8194	Ak3	19	29020833	29047961	-	3120	protein_coding	adenylate kinase 3 [Source:MGI Symbol;Acc:MGI:1860835]	-
ENSMUSG00000095526	23.5633	48.4529	57.0012	23.4511	73.4281	19.7809	21.6299	12.9935	27.1159	62.8281	22.1799	14.5494	51.2359	11.7416	18.2905	8.87133	23.3007	18.1109	Gm10243	6	48523518	48523850	+	333	processed_pseudogene	predicted gene 10243 [Source:MGI Symbol;Acc:MGI:3704266]	-
ENSMUSG00000027828	46.6136	27.004	35.7968	31.9514	20.8258	30.8344	21.9459	31.1133	32.3193	21.9696	31.645	22.8485	27.5794	29.2912	37.5669	27.9912	28.1629	31.5585	Ssr3	3	65379655	65392623	-	4172	protein_coding	signal sequence receptor, gamma [Source:MGI Symbol;Acc:MGI:1914687]	-
ENSMUSG00000006412	53.297	32.7833	31.8634	24.0021	27.8913	27.2718	32.1794	25.5289	23.9357	27.86	39.6797	15.612	36.1997	29.4232	29.4069	29.662	27.5952	22.8257	Pfdn2	1	171345670	171359254	+	1937	protein_coding	prefoldin 2 [Source:MGI Symbol;Acc:MGI:1276111]	-
ENSMUSG00000038375	27.1886	43.2919	28.5676	23.0838	49.9686	51.2013	46.558	39.1877	15.0623	41.7562	29.8994	11.6892	16.6101	26.7377	14.3845	16.5258	39.9916	14.5573	Trp53inp2	2	155381059	155389850	+	5257	protein_coding	transformation related protein 53 inducible nuclear protein 2 [Source:MGI Symbol;Acc:MGI:1915978]	-
ENSMUSG00000038235	40.9624	29.8338	22.9973	37.3721	25.2958	14.1138	24.0827	21.4539	36.3529	17.5835	28.3853	19.9371	54.9794	28.7678	39.365	33.0988	21.922	39.3571	F11r	1	171437535	171464603	+	2663	protein_coding	F11 receptor [Source:MGI Symbol;Acc:MGI:1321398]	-
ENSMUSG00000083563	62.1393	32.6122	45.5112	4.13764	35.7185	44.641	43.4819	52.2385	2.47263	17.1957	34.7335	4.33797	17.5073	13.2112	21.4601	10.8091	88.9629	3.71889	Gm13340	2	22588103	22589647	-	1545	unprocessed_pseudogene	predicted gene 13340 [Source:MGI Symbol;Acc:MGI:3650227]	-
ENSMUSG00000028452	40.9137	30.3821	35.2159	26.1314	29.0677	25.6665	31.295	26.2851	24.216	26.4934	31.0458	27.6237	29.5667	32.9509	25.4914	38.0798	27.5214	26.9396	Vcp	4	42979963	43000507	-	4851	protein_coding	valosin containing protein [Source:MGI Symbol;Acc:MGI:99919]	-
ENSMUSG00000071379	55.1879	36.5732	61.4859	28.5647	28.2812	23.0122	48.6231	41.0516	12.5496	32.7193	20.8341	13.9345	28.3152	21.3864	16.2713	12.5202	34.7321	18.4876	Hpcal1	12	17690856	17791933	+	1695	protein_coding	hippocalcin-like 1 [Source:MGI Symbol;Acc:MGI:1855689]	-
ENSMUSG00000006589	40.488	27.1674	26.1675	27.1009	35.0082	26.2314	38.8527	25.6433	22.9019	38.0414	45.09	22.4247	32.4233	25.9337	26.2666	21.6144	27.3013	25.2572	Aprt	8	122574635	122576909	-	1615	protein_coding	adenine phosphoribosyl transferase [Source:MGI Symbol;Acc:MGI:88061]	-
ENSMUSG00000027566	52.3536	32.476	47.6586	19.4206	26.3095	22.2483	24.7621	21.3352	23.4657	31.1437	29.3491	25.8602	41.6226	30.9881	24.065	32.1566	23.421	24.6806	Psma7	2	180036374	180042433	-	3071	protein_coding	proteasome (prosome, macropain) subunit, alpha type 7 [Source:MGI Symbol;Acc:MGI:1347070]	-
ENSMUSG00000021453	156.609	9.73318	125.69	25.4222	9.9695	16.6265	11.3362	15.4322	30.7174	24.0646	22.4316	11.8404	11.1159	10.5084	18.2467	7.0414	14.5945	11.1514	Gadd45g	13	51846678	51848468	+	1173	protein_coding	growth arrest and DNA-damage-inducible 45 gamma [Source:MGI Symbol;Acc:MGI:1346325]	-
ENSMUSG00000032050	27.8258	33.235	26.9177	26.7775	37.7086	42.2916	42.6681	46.6163	15.6839	21.7982	27.5887	13.3334	24.7283	25.7711	27.2758	23.3669	49.3015	18.842	Rdx	9	52047173	52088735	+	4639	protein_coding	radixin [Source:MGI Symbol;Acc:MGI:97887]	-
ENSMUSG00000020415	10.9237	28.0708	14.7434	24.7171	24.9348	28.0918	25.0711	29.0074	32.2982	38.5226	30.8131	18.3098	43.5208	39.9611	38.1099	38.7054	30.0513	35.6151	Pttg1	11	43420250	43426251	-	2000	protein_coding	pituitary tumor-transforming gene 1 [Source:MGI Symbol;Acc:MGI:1353578]	-
ENSMUSG00000020485	38.7086	22.6373	42.3279	18.0067	30.4713	23.4459	36.1726	32.7151	17.3277	44.2436	32.2202	38.3172	26.3582	30.3916	20.7632	27.3924	27.1948	22.0619	Supt4a	11	87737552	87743623	+	942	protein_coding	suppressor of Ty 4A [Source:MGI Symbol;Acc:MGI:107416]	-
ENSMUSG00000036114	36.6662	26.1241	22.314	25.5017	32.9682	38.7775	48.7067	28.9872	26.1686	39.1837	31.952	20.1401	30.4647	29.8063	24.0518	21.411	22.8769	24.3736	Rpp25l	4	41712033	41713534	-	856	protein_coding	ribonuclease P/MRP 25 subunit-like [Source:MGI Symbol;Acc:MGI:1917211]	-
ENSMUSG00000046242	1.66629	5.84755	0	12.4351	9.94377	7.30496	3.41703	9.2978	52.658	5.89452	9.02685	40.9332	40.4367	79.9473	68.0291	109.985	23.8615	49.7724	Nme9	9	99451475	99474751	+	1662	protein_coding	NME/NM23 family member 9 [Source:MGI Symbol;Acc:MGI:4359686]	-
ENSMUSG00000005514	14.5016	17.5993	2.7314	18.2197	10.5275	10.4071	3.78926	10.2335	43.5087	10.7779	13.1161	49.2707	25.1999	60.2055	32.3	138.405	19.8479	49.4853	Por	5	135670033	135735326	+	4021	protein_coding	P450 (cytochrome) oxidoreductase [Source:MGI Symbol;Acc:MGI:97744]	-
ENSMUSG00000066026	14.6653	28.658	10.2372	39.4987	23.1133	22.7251	26.217	23.1692	47.5791	24.6204	27.2839	24.0564	41.751	38.6031	44.3432	45.1291	12.8757	35.5288	Dhrs3	4	144892827	144928209	+	2927	protein_coding	dehydrogenase/reductase (SDR family) member 3 [Source:MGI Symbol;Acc:MGI:1315215]	-
ENSMUSG00000001240	8.52934	46.4489	11.7174	80.4782	37.3879	33.1013	39.9053	48.1772	19.4109	38.1286	35.3451	6.86158	14.9175	12.5474	30.6653	10.1364	16.0434	40.1077	Ramp2	11	101246028	101259546	+	3301	protein_coding	receptor (calcitonin) activity modifying protein 2 [Source:MGI Symbol;Acc:MGI:1859650]	-
ENSMUSG00000001918	7.18946	8.99916	7.92433	32.6488	19.8944	11.2971	6.30668	7.34268	57.0706	13.9665	24.8619	67.2617	33.124	49.5481	52.7187	61.9791	16.9409	50.7002	Slc1a5	7	16781340	16798274	+	4173	protein_coding	solute carrier family 1 (neutral amino acid transporter), member 5 [Source:MGI Symbol;Acc:MGI:105305]	-
ENSMUSG00000021508	47.2426	26.3906	48.4838	36.0436	25.0212	26.7223	48.5218	40.9372	17.2981	45.8966	18.8235	4.90593	21.752	28.9095	17.0912	28.643	27.9758	18.8693	Cxcl14	13	56288643	56296551	-	1827	protein_coding	chemokine (C-X-C motif) ligand 14 [Source:MGI Symbol;Acc:MGI:1888514]	-
ENSMUSG00000031701	75.4016	23.8505	52.2462	17.0194	25.6641	25.0067	25.0956	27.0399	19.5534	19.2557	21.8784	29.4903	26.0638	29.159	23.8612	37.0244	27.4473	24.1758	Dnaja2	8	85537633	85555344	-	2975	protein_coding	DnaJ heat shock protein family (Hsp40) member A2 [Source:MGI Symbol;Acc:MGI:1931882]	-
ENSMUSG00000063480	45.3039	28.7843	38.4596	18.2231	34.1105	34.8514	40.029	32.5548	24.1109	27.0307	36.7054	19.5659	30.5507	22.2791	21.6956	20.6598	31.6748	22.1586	Snu13	15	82040525	82047598	-	2924	protein_coding	SNU13 homolog, small nuclear ribonucleoprotein (U4/U6.U5) [Source:MGI Symbol;Acc:MGI:893586]	-
ENSMUSG00000031827	32.776	32.2795	69.339	19.094	37.0599	14.7285	21.5236	19.1433	14.5793	59.8222	28.9958	68.8592	19.0772	14.9898	19.4575	17.112	20.8355	18.8429	Cotl1	8	119809222	119840544	-	1596	protein_coding	coactosin-like 1 (Dictyostelium) [Source:MGI Symbol;Acc:MGI:1919292]	-
ENSMUSG00000034227	2.40489	12.4464	1.00128	11.2164	11.0537	10.7344	5.06954	11.1767	49.2207	7.78636	13.3752	45.5463	57.3779	77.9431	50.7252	92.8121	24.6979	43.5926	Foxj1	11	116330704	116335399	-	2623	protein_coding	forkhead box J1 [Source:MGI Symbol;Acc:MGI:1347474]	Fork
ENSMUSG00000040659	48.4632	28.4929	80.8233	20.3958	30.6054	28.9127	18.7323	23.6611	21.7331	27.1977	29.2753	26.5037	30.4688	17.0338	22.0677	19.2691	29.4841	24.97	Efhd2	4	141858142	141874920	-	2381	protein_coding	EF hand domain containing 2 [Source:MGI Symbol;Acc:MGI:106504]	-
ENSMUSG00000018849	18.0531	27.2984	33.4071	30.2658	26.5388	23.8525	35.7457	17.7851	30.5981	24.1704	27.2458	12.6821	32.3148	39.121	34.2966	35.2617	49.9596	28.6808	Wwc1	11	35838400	35980527	-	4960	protein_coding	WW, C2 and coiled-coil domain containing 1 [Source:MGI Symbol;Acc:MGI:2388637]	-
ENSMUSG00000105814	15.5266	45.8793	2.19046	24.3257	22.1666	49.7672	35.5817	37.2653	23.8962	47.224	41.2916	27.0398	47.7219	3.64792	22.8235	14.9339	28.2479	37.3849	Mir703	5	98475556	98475664	-	109	miRNA	microRNA 703 [Source:MGI Symbol;Acc:MGI:3629657]	-
ENSMUSG00000058833	11.7375	26.9809	18.6081	29.0057	31.4022	40.8315	43.9415	30.6781	28.6869	41.557	39.0172	22.1594	21.3549	32.8443	27.2139	31.5011	21.4281	26.6818	Rex1bd	8	70504292	70506752	-	1822	protein_coding	required for excision 1-B domain containing [Source:MGI Symbol;Acc:MGI:1913712]	-
ENSMUSG00000024168	25.1679	39.1627	30.7737	37.1314	42.7147	46.4382	45.725	65.6514	13.6186	27.0924	27.6137	8.03075	14.7286	16.3865	15.4398	14.9328	36.824	17.3931	Tmem204	17	25057702	25083591	-	2378	protein_coding	transmembrane protein 204 [Source:MGI Symbol;Acc:MGI:3039635]	-
ENSMUSG00000068749	37.3863	37.0708	52.3247	19.632	22.6801	26.5942	26.4237	31.4173	29.0506	12.8211	27.4316	25.2761	35.1767	31.856	28.5084	25.8315	25.4526	28.9967	Psma5	3	108256926	108279974	+	1321	protein_coding	proteasome (prosome, macropain) subunit, alpha type 5 [Source:MGI Symbol;Acc:MGI:1347009]	-
ENSMUSG00000044986	3.0158	22.7312	0.490654	17.9715	25.3915	22.867	9.28394	19.933	58.1931	22.1009	24.9563	43.8081	45.7183	51.3948	39.6921	64.444	18.4177	33.2516	Tst	15	78399556	78405907	-	3163	protein_coding	thiosulfate sulfurtransferase, mitochondrial [Source:MGI Symbol;Acc:MGI:98852]	-
ENSMUSG00000082127	52.5356	27.156	20.3819	20.1985	31.5869	36.5422	47.9734	24.5524	13.9764	37.259	31.5252	16.9376	16.2394	30.0642	24.6893	29.7033	38.4502	23.6546	Gm13577	2	64474745	64474949	-	205	processed_pseudogene	predicted gene 13577 [Source:MGI Symbol;Acc:MGI:3649301]	-
ENSMUSG00000103653	26.5771	16.2991	10.2163	24.0035	14.2443	16.9891	36.2201	24.7695	31.9223	23.6832	23.9588	25.402	43.9657	49.0465	45.8833	46.817	24.7883	38.6185	Gstp-ps	1	192073820	192074450	-	631	processed_pseudogene	glutathione S-transferase, pi, pseudogene [Source:MGI Symbol;Acc:MGI:3782108]	-
ENSMUSG00000078974	55.4475	28.9883	38.905	18.9127	28.7508	36.0636	35.3595	29.8881	17.3012	42.7244	30.9588	18.4995	21.7582	23.3991	21.2547	20.2105	31.2901	23.6162	Sec61g	11	16500530	16508484	-	2464	protein_coding	SEC61, gamma subunit [Source:MGI Symbol;Acc:MGI:1202066]	-
ENSMUSG00000057278	19.9913	40.6871	36.9545	18.4848	33.9186	27.0656	23.027	36.3334	24.9409	19.0371	26.9033	40.5545	39.3606	28.4077	26.8283	26.6884	33.3397	20.4786	Snrpg	6	86371304	86379328	+	1570	protein_coding	small nuclear ribonucleoprotein polypeptide G [Source:MGI Symbol;Acc:MGI:1915261]	-
ENSMUSG00000030805	19.8501	33.2879	21.2601	28.9469	33.769	32.3441	38.6716	32.0863	17.8494	32.3101	33.0007	29.8709	29.4557	33.3876	23.3332	22.111	39.5949	21.7366	Stx4a	7	127824294	127849019	+	2364	protein_coding	syntaxin 4A (placental) [Source:MGI Symbol;Acc:MGI:893577]	-
ENSMUSG00000042747	23.1489	31.6172	15.2166	24.5089	28.8289	36.0658	29.1227	26.9201	28.922	42.6569	32.377	26.7394	30.3033	31.9161	30.9716	29.7483	22.9005	30.3882	Krtcap2	3	89245966	89249906	+	1522	protein_coding	keratinocyte associated protein 2 [Source:MGI Symbol;Acc:MGI:1913309]	-
ENSMUSG00000021950	8.02007	5.97251	2.54	8.67475	5.08936	11.5418	3.38919	10.9909	39.0242	12.1885	12.3385	54.9994	68.7656	74.6601	56.399	80.043	22.7324	44.8029	Anxa8	14	34085981	34100571	+	1880	protein_coding	annexin A8 [Source:MGI Symbol;Acc:MGI:1201374]	-
ENSMUSG00000001946	98.2586	33.2729	35.1436	76.9386	17.4955	12.7491	22.5141	26.7649	24.8628	25.1356	24.8762	12.2236	18.4578	8.89926	25.6876	9.33667	9.15008	39.2572	Esam	9	37528078	37538319	+	2867	protein_coding	endothelial cell-specific adhesion molecule [Source:MGI Symbol;Acc:MGI:1916774]	-
ENSMUSG00000087632	7.3264	109.017	13.4639	25.5801	9.68887	16.5089	53.1146	75.2453	17.4081	106.952	35.2867	4.75589	0	2.82356	17.845	8.61269	5.24746	11.6427	Gm6058	1	157383931	157384329	-	399	processed_pseudogene	predicted gene 6058 [Source:MGI Symbol;Acc:MGI:3648617]	-
ENSMUSG00000003161	33.2632	30.298	30.9768	20.1073	39.3996	34.5787	40.1384	33.7413	15.228	26.967	23.4282	20.4036	19.9262	33.1626	24.611	29.9704	43.2536	20.7107	Sri	5	8046078	8069379	+	4852	protein_coding	sorcin [Source:MGI Symbol;Acc:MGI:98419]	-
ENSMUSG00000030591	76.6001	27.5319	50.4933	21.1135	24.7228	29.4059	30.7659	24.0326	21.1306	30.9604	24.6136	23.7466	26.6352	26.1657	18.4787	21.5754	20.7887	20.8747	Psmd8	7	29174188	29180701	-	3057	protein_coding	proteasome (prosome, macropain) 26S subunit, non-ATPase, 8 [Source:MGI Symbol;Acc:MGI:1888669]	-
ENSMUSG00000036398	28.2001	31.5315	32.2779	24.6253	29.1652	34.2023	41.87	30.2688	19.5627	28.9214	38.0982	20.1566	22.3343	33.7225	30.774	24.2987	30.1199	19.3122	Ppp1r11	17	36948356	36951741	-	1975	protein_coding	protein phosphatase 1, regulatory inhibitor subunit 11 [Source:MGI Symbol;Acc:MGI:1923747]	-
ENSMUSG00000071014	26.3817	28.3496	32.4264	18.9601	40.4771	24.1069	56.1205	36.3126	20.553	30.7399	25.3926	24.9966	24.7324	36.8058	29.4845	25.067	16.6333	21.6424	Ndufb6	4	40270591	40279421	-	659	protein_coding	NADH:ubiquinone oxidoreductase subunit B6 [Source:MGI Symbol;Acc:MGI:2684983]	-
ENSMUSG00000026691	0	14.7809	4.79894	7.87251	14.0183	16.7001	5.33852	18.2607	59.3693	12.1799	19.3696	54.9481	33.1115	36.6095	64.9874	74.3554	23.5297	58.8699	Fmo3	1	162953800	162984528	-	2413	protein_coding	flavin containing monooxygenase 3 [Source:MGI Symbol;Acc:MGI:1100496]	-
ENSMUSG00000006717	4.54946	21.8134	10.7506	27.8761	24.6812	33.1575	16.942	29.3155	26.7238	35.2624	30.5574	33.0484	24.144	38.2125	34.0718	59.3974	30.9558	36.4774	Acot13	13	24817948	24831540	-	744	protein_coding	acyl-CoA thioesterase 13 [Source:MGI Symbol;Acc:MGI:1914084]	-
ENSMUSG00000029538	20.1975	34.6484	47.1597	25.1814	30.5199	25.4721	28.8258	23.7717	22.3754	50.4265	30.998	20.3704	24.0417	34.3981	26.5969	22.6129	27.4933	22.3346	Srsf9	5	115327177	115333080	+	1653	protein_coding	serine/arginine-rich splicing factor 9 [Source:MGI Symbol;Acc:MGI:104896]	-
ENSMUSG00000028464	13.3809	16.1206	3.52928	38.5944	22.7912	27.9272	10.4279	25.6499	21.37	19.6926	40.3064	89.9508	31.9719	21.9839	38.4543	41.8643	17.8666	34.4739	Tpm2	4	43514711	43523765	-	2909	protein_coding	tropomyosin 2, beta [Source:MGI Symbol;Acc:MGI:98810]	-
ENSMUSG00000078453	54.7815	30.3796	27.697	16.2348	36.2424	38.8941	23.7416	30.2704	19.157	41.3542	34.2062	25.0046	22.7246	20.2703	24.7363	17.0704	34.7556	17.8279	Abracl	10	18011260	18023288	-	1056	protein_coding	ABRA C-terminal like [Source:MGI Symbol;Acc:MGI:1920362]	-
ENSMUSG00000030800	6.47983	25.3721	1.22474	28.5555	23.431	8.64772	16.903	12.9688	47.8183	21.8764	29.7236	15.7181	38.4978	49.8818	49.6552	60.1911	22.943	54.9195	Prss8	7	127925716	127930104	-	1852	protein_coding	protease, serine 8 (prostasin) [Source:MGI Symbol;Acc:MGI:1923810]	-
ENSMUSG00000025980	32.4364	32.4637	36.8261	16.9786	32.9959	29.8696	31.0373	26.5376	31.1538	15.2722	24.1992	30.4871	29.1652	28.7457	26.9498	32.3122	34.0767	23.1665	Hspd1	1	55077835	55088243	-	2642	protein_coding	heat shock protein 1 (chaperonin) [Source:MGI Symbol;Acc:MGI:96242]	-
ENSMUSG00000020171	36.6424	34.8082	38.4715	27.3634	28.0719	29.9391	35.2405	26.4596	29.2069	28.1632	39.8004	23.0263	16.1259	25.3842	24.5533	22.0278	25.1544	24.133	Yeats4	10	117215221	117224507	-	1415	protein_coding	YEATS domain containing 4 [Source:MGI Symbol;Acc:MGI:1927224]	-
ENSMUSG00000032350	47.6761	15.5839	39.9412	38.3859	16.8862	16.0161	25.7094	14.3732	29.4636	14.3736	14.9542	24.1754	25.4698	37.0066	43.6897	40.374	25.247	45.0994	Gclc	9	77754535	77794485	+	3766	protein_coding	glutamate-cysteine ligase, catalytic subunit [Source:MGI Symbol;Acc:MGI:104990]	-
ENSMUSG00000053332	33.9625	33.8275	35.56	18.9144	32.6439	35.6902	32.5288	29.6377	23.8071	19.5634	27.8076	32.7613	27.6317	25.8385	24.2411	20.7323	33.771	24.8833	Gas5	1	161034422	161038539	+	3760	processed_transcript	growth arrest specific 5 [Source:MGI Symbol;Acc:MGI:95659]	-
ENSMUSG00000031311	13.2579	38.3677	14.7076	26.7578	33.3789	35.6328	33.4335	33.666	27.4857	32.3742	32.9992	25.0275	19.9586	29.8861	27.2257	25.2317	36.4556	27.9146	Nono	X	101429318	101448591	+	4375	protein_coding	non-POU-domain-containing, octamer binding protein [Source:MGI Symbol;Acc:MGI:1855692]	-
ENSMUSG00000018677	14.682	38.2763	29.5417	27.4523	37.9432	40.1158	28.4468	25.6321	19.9101	26.6902	33.7086	19.2203	28.8647	34.9628	26.5665	30.0569	25.517	25.816	Slc25a39	11	102402985	102407946	-	2756	protein_coding	solute carrier family 25, member 39 [Source:MGI Symbol;Acc:MGI:1196386]	-
ENSMUSG00000050628	35.0491	34.3671	41.5336	24.5149	36.274	30.3504	26.0393	30.3756	17.7953	44.3294	25.5367	17.8154	21.3681	30.064	23.966	24.8711	27.6549	19.9226	Ubald2	11	116434094	116439077	+	1532	protein_coding	UBA-like domain containing 2 [Source:MGI Symbol;Acc:MGI:1914635]	-
ENSMUSG00000062647	3.45546	15.3109	25.6053	15.0101	6.40331	19.3628	26.8319	27.7154	44.9959	25.4523	25.6599	76.691	25.5071	28.5771	30.1764	20.6492	46.8164	47.3391	Rpl7a	2	26910764	26913318	+	1781	protein_coding	ribosomal protein L7A [Source:MGI Symbol;Acc:MGI:1353472]	-
ENSMUSG00000031950	27.9916	31.2489	35.0694	16.7003	36.788	43.0526	39.082	35.9667	17.0659	26.9244	29.6826	18.5288	24.5505	30.7267	16.9909	27.4346	32.2602	20.7341	Gabarapl2	8	111940703	111953612	+	2325	protein_coding	gamma-aminobutyric acid (GABA) A receptor-associated protein-like 2 [Source:MGI Symbol;Acc:MGI:1890602]	-
ENSMUSG00000030603	45.95	29.4016	35.102	25.8771	32.1261	17.6151	25.9995	26.7398	29.3023	18.6542	25.8234	26.6176	25.8762	29.5966	28.0992	37.9906	22.8329	27.1287	Psmc4	7	28041707	28050101	-	2163	protein_coding	proteasome (prosome, macropain) 26S subunit, ATPase, 4 [Source:MGI Symbol;Acc:MGI:1346093]	-
ENSMUSG00000056492	45.6611	45.9525	27.4004	77.8361	30.9355	23.9967	36.3582	41.2895	17.0177	22.7783	31.5218	8.40201	8.35965	12.9599	20.0657	14.4064	19.9709	25.7206	Adgrf5	17	43360451	43459557	+	9010	protein_coding	adhesion G protein-coupled receptor F5 [Source:MGI Symbol;Acc:MGI:2182928]	-
ENSMUSG00000032484	232.418	0.077214	272.366	0.237787	0	1.90249	0	0	0.35525	0	0	0.198238	0	0	0.175501	0	0.806291	0.566893	Ngp	9	110419747	110423012	+	1222	protein_coding	neutrophilic granule protein [Source:MGI Symbol;Acc:MGI:105983]	-
ENSMUSG00000071202	0	8.74403	0.144615	13.992	8.19534	0.860531	1.17456	4.33223	36.391	14.1808	20.97	34.8233	37.9336	94.0873	62.611	101.735	23.4983	45.3651	Ccdc78	17	25786580	25790513	+	1651	protein_coding	coiled-coil domain containing 78 [Source:MGI Symbol;Acc:MGI:2685784]	-
ENSMUSG00000027170	45.4435	22.5506	29.2688	15.0056	33.0613	33.212	30.4304	28.5705	18.6049	36.5429	33.3738	22.7905	34.8386	23.2331	19.8067	19.8325	39.421	22.8921	Eif3m	2	104999656	105017080	-	2590	protein_coding	eukaryotic translation initiation factor 3, subunit M [Source:MGI Symbol;Acc:MGI:1351744]	-
ENSMUSG00000024854	15.8927	29.3435	14.8241	26.4631	24.6395	29.8057	43.9898	31.4396	20.2269	41.6027	39.4405	43.5245	29.1142	23.2311	26.7724	19.9417	22.8727	24.5841	Pold4	19	4231899	4233631	+	910	protein_coding	polymerase (DNA-directed), delta 4 [Source:MGI Symbol;Acc:MGI:1916995]	-
ENSMUSG00000016921	31.1227	20.617	26.3827	34.9929	27.7884	15.5204	17.8543	18.5233	43.3754	17.9509	24.4965	47.0727	20.1867	28.8091	40.2707	35.2959	20.6378	36.5984	Srsf6	2	162931528	162937121	+	4810	protein_coding	serine/arginine-rich splicing factor 6 [Source:MGI Symbol;Acc:MGI:1915246]	-
ENSMUSG00000027593	28.5556	33.4773	35.2845	23.7218	39.2223	32.721	36.5221	30.3104	19.2002	30.3139	23.0319	27.2638	23.554	27.1162	21.9674	24.0459	28.5455	22.1201	Raly	2	154791096	154867261	+	3292	protein_coding	hnRNP-associated with lethal yellow [Source:MGI Symbol;Acc:MGI:97850]	-
ENSMUSG00000001105	17.3528	38.2372	18.4745	19.8877	37.5812	39.3826	28.2479	32.5996	21.4069	20.2521	24.2918	17.5265	24.6952	33.0701	26.4667	35.4221	36.4233	34.577	Ift20	11	78536361	78541737	+	1525	protein_coding	intraflagellar transport 20 [Source:MGI Symbol;Acc:MGI:1915585]	-
ENSMUSG00000029840	38.0751	33.8822	32.4677	20.1605	31.3857	28.9301	29.9765	30.616	20.5437	28.6387	30.1918	19.0555	27.0768	29.2528	24.0566	25.5009	32.0343	23.6986	Mtpn	6	35508906	35539888	-	3960	protein_coding	myotrophin [Source:MGI Symbol;Acc:MGI:99445]	-
ENSMUSG00000024847	12.2321	28.5941	19.5988	20.8893	33.4296	32.2728	36.9706	34.2816	16.1364	48.005	34.7942	20.6771	28.9311	31.3049	19.9294	27.5455	35.5431	23.8355	Aip	19	4114446	4125858	-	1937	protein_coding	aryl-hydrocarbon receptor-interacting protein [Source:MGI Symbol;Acc:MGI:109622]	-
ENSMUSG00000019818	29.4983	24.0714	29.9993	28.0599	27.7405	22.8762	22.6343	26.854	35.2834	22.8411	22.2301	31.6171	32.9086	31.251	31.5933	32.1296	22.4785	30.4912	Cd164	10	41519414	41531048	+	4449	protein_coding	CD164 antigen [Source:MGI Symbol;Acc:MGI:1859568]	-
ENSMUSG00000082044	73.3428	54.1107	38.5096	12.1073	47.4572	25.4612	39.7175	14.2423	18.6716	32.1379	30.1955	18.8125	3.48022	20.665	13.2213	14.478	33.9907	12.999	Snrpert	2	131322088	131322366	-	279	processed_pseudogene	small nuclear ribonucleoprotein E, pseudogene [Source:MGI Symbol;Acc:MGI:3650419]	-
ENSMUSG00000029404	38.6236	26.3698	40.8971	26.1205	30.1601	26.9601	25.5512	23.086	19.207	15.6603	20.728	31.9748	31.9364	36.5821	26.6219	31.5241	23.5731	27.7787	Arl6ip4	5	124116089	124118196	+	1442	protein_coding	ADP-ribosylation factor-like 6 interacting protein 4 [Source:MGI Symbol;Acc:MGI:1929500]	-
ENSMUSG00000040732	3.77312	37.8947	20.0459	20.4455	57.5529	65.7341	54.3908	41.3488	5.58613	17.9651	22.6747	6.51163	12.7666	26.73	15.172	14.4895	66.1644	14.0966	Erg	16	95359169	95586593	-	3466	protein_coding	ETS transcription factor [Source:MGI Symbol;Acc:MGI:95415]	ETS
ENSMUSG00000019428	18.0725	27.1046	12.995	28.2379	24.6258	31.769	29.0547	25.6777	25.8034	32.0066	30.5521	31.8788	29.6321	35.7472	31.1394	32.5339	25.671	30.7354	Fkbp8	8	70527724	70535328	+	4529	protein_coding	FK506 binding protein 8 [Source:MGI Symbol;Acc:MGI:1341070]	-
ENSMUSG00000024538	48.9319	30.7426	21.908	55.5844	25.9277	35.8549	27.8968	30.9677	30.7189	21.4336	34.4599	23.4523	20.6018	12.8315	26.716	19.8306	12.8333	22.181	Ppic	18	53406341	53418007	-	1286	protein_coding	peptidylprolyl isomerase C [Source:MGI Symbol;Acc:MGI:97751]	-
ENSMUSG00000036887	19.5277	22.5002	12.5119	39.9541	39.3091	15.648	16.382	21.4813	24.7947	8.30229	33.5118	51.9821	29.8764	30.6501	34.5202	26.8981	30.0797	44.7854	C1qa	4	136895917	136898803	-	1040	protein_coding	complement component 1, q subcomponent, alpha polypeptide [Source:MGI Symbol;Acc:MGI:88223]	-
ENSMUSG00000063902	41.3107	19.5148	47.8212	15.2352	41.1694	36.0855	36.7898	17.3017	19.7211	23.738	32.7455	24.3184	30.8528	29.7689	21.6641	19.9942	20.8247	22.4744	Gm7964	7	83755904	83757281	+	1378	processed_pseudogene	predicted gene 7964 [Source:MGI Symbol;Acc:MGI:3646150]	-
ENSMUSG00000070858	0	16.9248	0	10.2613	29.9041	5.21265	12.4228	8.97545	36.4683	14.3956	31.9131	12.3115	63.4466	59.9308	58.1516	64.6145	31.1124	45.0134	Gm1673	5	33983433	33985013	+	669	protein_coding	predicted gene 1673 [Source:MGI Symbol;Acc:MGI:2686519]	-
ENSMUSG00000063556	24.3274	31.6535	40.0484	12.1849	47.2907	42.2247	67.1855	26.4153	23.7465	19.8687	27.3716	15.1836	37.7901	19.5413	20.2548	11.3364	21.8426	12.5383	Gm10132	14	77251847	77252314	-	468	processed_pseudogene	predicted gene 10132 [Source:MGI Symbol;Acc:MGI:3704449]	-
ENSMUSG00000035692	57.1866	21.2175	61.1111	19.9867	21.9884	45.6153	56.4319	31.6534	7.00556	27.8939	26.7141	7.26313	48.5308	14.2885	10.7231	6.22027	27.2062	9.16327	Isg15	4	156199424	156200818	-	756	protein_coding	ISG15 ubiquitin-like modifier [Source:MGI Symbol;Acc:MGI:1855694]	-
ENSMUSG00000022635	65.9161	32.8127	47.4956	21.6466	33.8923	29.4534	38.2109	28.2086	14.3481	20.148	29.9962	11.2034	15.455	19.8984	17.2184	17.9062	39.6647	16.557	Zcrb1	15	93386097	93398334	-	3074	protein_coding	zinc finger CCHC-type and RNA binding motif 1 [Source:MGI Symbol;Acc:MGI:1914447]	-
ENSMUSG00000021892	54.6246	29.5415	44.2909	27.9977	32.4677	34.7359	51.3467	35.1939	11.4713	26.8252	36.6376	12.7039	22.6699	15.8311	16.0209	10.8535	23.0589	12.2734	Sh3bp5	14	31359880	31436078	-	3194	protein_coding	SH3-domain binding protein 5 (BTK-associated) [Source:MGI Symbol;Acc:MGI:1344391]	-
ENSMUSG00000022174	26.7556	29.2994	17.7119	28.4565	26.8764	23.0545	21.3997	21.7374	34.5208	23.1938	25.4916	22.5482	24.9369	34.9799	36.5506	40.0437	25.821	34.8182	Dad1	14	54235479	54254104	-	3916	protein_coding	defender against cell death 1 [Source:MGI Symbol;Acc:MGI:101912]	-
ENSMUSG00000071637	106.252	13.501	140.955	11.839	13.7772	16.0672	15.9369	20.4138	27.3263	24.8226	22.0581	8.14818	12.5529	5.94418	17.1638	7.93443	16.176	16.8611	Cebpd	16	15887286	15891031	+	3746	protein_coding	CCAAT/enhancer binding protein (C/EBP), delta [Source:MGI Symbol;Acc:MGI:103573]	-
ENSMUSG00000036315	37.5713	41.1293	28.8611	21.9972	15.1047	32.1712	26.0455	33.6391	33.4995	40.7511	36.6364	26.374	13.5494	16.0215	25.924	20.2435	24.2111	23.2357	Znrd1	17	36954356	36958559	-	819	protein_coding	zinc ribbon domain containing, 1 [Source:MGI Symbol;Acc:MGI:1913386]	-
ENSMUSG00000022048	8.06714	44.5684	10.1948	42.3247	39.5566	39.3189	47.2237	40.1464	18.5555	40.2624	40.5959	9.47728	21.083	22.9601	18.5424	11.4709	22.0164	20.2396	Dpysl2	14	66802864	66868688	-	4520	protein_coding	dihydropyrimidinase-like 2 [Source:MGI Symbol;Acc:MGI:1349763]	-
ENSMUSG00000036585	33.3991	32.2774	21.7288	22.584	45.329	34.2068	47.7113	25.9322	15.6162	18.2907	23.7116	9.39001	10.3258	26.1917	18.9915	28.8343	61.077	20.594	Fgf1	18	38838673	38929404	-	4648	protein_coding	fibroblast growth factor 1 [Source:MGI Symbol;Acc:MGI:95515]	-
ENSMUSG00000001349	2.5305	19.416	0	32.7242	20.2407	21.904	10.7835	26.4972	34.6531	10.0137	47.4526	108.374	29.532	23.3739	26.3688	37.8568	18.006	26.2728	Cnn1	9	22099216	22109630	+	2736	protein_coding	calponin 1 [Source:MGI Symbol;Acc:MGI:104979]	-
ENSMUSG00000074364	16.7409	36.5146	23.834	39.6284	42.7631	45.2141	48.9225	38.3122	12.3815	28.7393	29.6233	10.9395	22.938	21.3091	16.5319	12.5194	32.5526	15.8333	Ehd2	7	15946958	15967567	-	5119	protein_coding	EH-domain containing 2 [Source:MGI Symbol;Acc:MGI:2154274]	-
ENSMUSG00000056116	46.2374	33.9945	37.3106	20.7569	35.3012	32.9137	45.7252	25.9166	8.6467	19.9897	24.4737	21.1451	33.4793	21.5467	13.506	16.5644	40.2961	17.0804	H2-T22	17	36037128	36042747	-	3414	protein_coding	histocompatibility 2, T region locus 22 [Source:MGI Symbol;Acc:MGI:95956]	-
ENSMUSG00000000078	73.1956	27.6126	50.1064	17.5695	27.4246	24.6197	27.255	32.5177	28.9674	12.5546	18.9494	14.6473	26.9621	21.8085	21.4218	14.9383	27.3753	26.8849	Klf6	13	5861482	5870394	+	4391	protein_coding	Kruppel-like factor 6 [Source:MGI Symbol;Acc:MGI:1346318]	zf-C2H2
ENSMUSG00000066551	33.2335	31.2202	27.498	24.4846	29.1883	34.8929	25.5354	28.1978	25.2881	26.5779	34.3251	17.7156	25.4337	30.833	27.1974	24.1371	22.9992	25.4005	Hmgb1	5	149046702	149184489	-	5023	protein_coding	high mobility group box 1 [Source:MGI Symbol;Acc:MGI:96113]	HMG
ENSMUSG00000031146	39.2133	18.2487	41.255	17.9976	17.7499	28.6587	18.4825	19.5272	24.9275	15.6835	25.8666	21.4886	48.6635	34.0295	25.594	37.4658	27.0511	32.0437	Plp2	X	7667941	7671390	-	1334	protein_coding	proteolipid protein 2 [Source:MGI Symbol;Acc:MGI:1298382]	-
ENSMUSG00000058672	45.0096	36.3943	52.7199	26.418	33.6162	29.5218	38.4572	41.4638	16.7175	29.3932	35.4099	16.3755	18.6529	11.1549	14.2531	10.1854	18.8949	18.7296	Tubb2a	13	34074274	34078007	-	1610	protein_coding	tubulin, beta 2A class IIA [Source:MGI Symbol;Acc:MGI:107861]	-
ENSMUSG00000034484	28.2028	31.78	30.2453	27.0294	37.3527	22.9058	24.3588	27.7234	21.3499	21.6115	30.2701	31.9105	26.4262	22.6498	26.8477	21.444	38.4228	22.5307	Snx2	18	53176365	53220860	+	2013	protein_coding	sorting nexin 2 [Source:MGI Symbol;Acc:MGI:1915054]	-
ENSMUSG00000024181	14.8541	31.0322	14.9928	25.374	24.0478	22.7091	33.8132	21.9024	29.9178	24.7635	30.4364	26.779	32.2282	32.8752	28.9877	36.8169	33.8354	27.1557	Mrpl28	17	26123520	26126613	+	1274	protein_coding	mitochondrial ribosomal protein L28 [Source:MGI Symbol;Acc:MGI:1915861]	-
ENSMUSG00000044424	30.0269	23.7926	29.278	14.6166	31.214	25.207	26.0762	27.4516	12.2962	39.0021	37.2724	27.9623	55.9399	25.8673	13.3344	19.055	40.6282	11.4718	Gm9493	19	23619742	23620320	+	579	protein_coding	predicted gene 9493 [Source:MGI Symbol;Acc:MGI:3779903]	-
ENSMUSG00000040713	32.4384	21.0123	7.53074	26.8954	19.5584	19.8494	20.2905	23.1411	31.9062	22.9174	20.6185	15.5891	41.1966	38.4942	34.9931	41.6049	27.427	44.6486	Creg1	1	165763746	165775308	+	2362	protein_coding	cellular repressor of E1A-stimulated genes 1 [Source:MGI Symbol;Acc:MGI:1344382]	-
ENSMUSG00000073155	28.1293	25.5546	44.5102	19.4265	34.229	22.547	47.7637	24.4545	18.9925	23.8571	26.4055	15.909	40.6569	22.1616	17.3326	16.5448	35.3468	26.0101	1810058I24Rik	6	35252654	35263496	+	2784	lincRNA	RIKEN cDNA 1810058I24 gene [Source:MGI Symbol;Acc:MGI:1914955]	-
ENSMUSG00000060438	28.2843	28.402	20.7407	22.7471	21.2818	28.4408	26.5836	18.5525	21.925	59.3739	40.7997	36.9487	21.9977	21.4208	25.3022	19.3655	26.3739	20.9922	Rps10-ps1	3	95622278	95622772	+	495	processed_pseudogene	ribosomal protein S10, pseudogene 1 [Source:MGI Symbol;Acc:MGI:3644167]	-
ENSMUSG00000116875	58.9061	23.3698	64.0635	9.40846	40.8927	30.3901	44.7421	26.427	11.4689	16.4503	8.21768	10.8332	36.3599	18.739	16.0681	18.3542	40.5452	14.214	AC115954.1	16	24529394	24530362	+	969	processed_pseudogene	mortality factor 4 like 1 (Morf4l1) pseudogene	-
ENSMUSG00000062081	55.762	27.2083	46.7413	7.495	54.2039	49.5447	43.9729	16.5859	14.7002	31.6278	24.4243	11.3219	12.2932	10.8698	9.75859	17.7039	39.0987	14.3378	Gm6055	14	48079375	48079752	-	378	processed_pseudogene	predicted gene 6055 [Source:MGI Symbol;Acc:MGI:3648620]	-
ENSMUSG00000047547	59.2599	25.3527	52.3084	17.3775	31.9442	36.0039	28.7102	22.4203	12.2173	27.4924	25.7456	11.8021	17.6239	27.649	16.7851	19.5431	37.0647	18.056	Cltb	13	54592401	54611344	-	4868	protein_coding	clathrin, light polypeptide (Lcb) [Source:MGI Symbol;Acc:MGI:1921575]	-
ENSMUSG00000031328	5.10666	21.501	5.32129	38.2848	25.3954	13.8776	15.5018	24.3114	36.9829	13.6369	32.031	60.1751	32.6932	23.3921	42.0711	30.4074	23.3613	42.6483	Flna	X	74223461	74249820	-	9400	protein_coding	filamin, alpha [Source:MGI Symbol;Acc:MGI:95556]	-
ENSMUSG00000005873	20.9463	24.2899	17.5316	33.1968	25.4807	18.5213	21.2032	25.6303	28.231	24.9585	30.6257	24.5539	31.5385	38.3792	29.7609	38.8315	21.3212	31.5267	Reep5	18	34344889	34373415	-	2894	protein_coding	receptor accessory protein 5 [Source:MGI Symbol;Acc:MGI:1270152]	-
ENSMUSG00000040212	33.0406	25.461	25.6371	41.4429	24.4549	13.8685	23.7971	21.7665	20.429	37.0541	25.2145	48.1402	43.1936	17.3875	25.5112	20.7718	16.7894	22.2962	Emp3	7	45918023	45921404	-	1071	protein_coding	epithelial membrane protein 3 [Source:MGI Symbol;Acc:MGI:1098729]	-
ENSMUSG00000024870	15.3435	24.2702	19.6473	24.6237	27.0189	28.7174	31.4772	33.9255	17.7904	22.803	25.5337	26.6669	32.4291	36.9815	16.4791	42.81	32.8205	26.6038	Rab1b	19	5099207	5106996	-	1835	protein_coding	RAB1B, member RAS oncogene family [Source:MGI Symbol;Acc:MGI:1923558]	-
ENSMUSG00000040078	64.4265	11.0081	42.2804	10.0642	14.6983	42.5145	39.5344	18.0284	6.69261	25.9446	16.1086	18.1685	22.2517	56.6061	21.7143	28.0092	27.9678	17.8279	Ptges3-ps	6	85843980	85844459	+	480	processed_pseudogene	prostaglandin E synthase 3, pseudogene [Source:MGI Symbol;Acc:MGI:3704271]	-
ENSMUSG00000044709	14.7638	36.9056	27.0648	28.1077	32.2155	24.7154	30.9365	31.0694	25.2381	46.3102	25.5807	21.3654	25.843	24.5818	24.0458	20.7052	20.1813	23.3475	Gemin7	7	19564946	19577595	-	1782	protein_coding	gem nuclear organelle associated protein 7 [Source:MGI Symbol;Acc:MGI:1916981]	-
ENSMUSG00000049881	6.43788	40.2851	18.1186	26.3527	43.5937	38.5642	55.7006	44.2765	12.6232	51.1091	44.3613	11.8546	14.0187	18.2832	10.0387	8.80815	24.2828	13.3231	2810025M15Rik	1	157412352	157420236	+	1410	transcribed_processed_pseudogene	RIKEN cDNA 2810025M15 gene [Source:MGI Symbol;Acc:MGI:1917203]	-
ENSMUSG00000021282	64.9031	20.1301	62.3681	16.7549	31.0771	31.6266	24.5955	22.1533	15.5696	16.7993	25.45	18.7427	18.3559	23.1461	19.6852	21.4635	29.3275	19.4666	Eif5	12	111538016	111546752	+	6820	protein_coding	eukaryotic translation initiation factor 5 [Source:MGI Symbol;Acc:MGI:95309]	-
ENSMUSG00000021996	72.9506	17.9685	73.4154	15.2043	28.1383	19.7612	29.6699	20.4885	16.4051	21.064	23.3827	16.097	25.1379	17.5225	16.6676	19.0216	27.735	20.4353	Esd	14	74732297	74750765	+	3366	protein_coding	esterase D/formylglutathione hydrolase [Source:MGI Symbol;Acc:MGI:95421]	-
ENSMUSG00000037373	17.221	34.1501	14.3757	30.0816	28.113	33.6745	37.1972	29.8485	25.0421	30.4566	34.1883	23.5698	25.5049	24.77	23.3532	21.8203	25.4797	21.7313	Ctbp1	5	33247723	33274994	-	4476	protein_coding	C-terminal binding protein 1 [Source:MGI Symbol;Acc:MGI:1201685]	-
ENSMUSG00000020467	5.74027	24.4574	1.64096	32.7914	18.4563	18.8316	10.1319	20.3308	25.9574	15.9769	25.4944	17.6403	103.506	34.8433	43.7979	23.9439	15.2969	41.6298	Efemp1	11	28853204	28926743	+	2037	protein_coding	epidermal growth factor-containing fibulin-like extracellular matrix protein 1 [Source:MGI Symbol;Acc:MGI:1339998]	-
ENSMUSG00000068823	36.9888	34.4984	31.7996	17.2181	36.3909	36.4656	37.786	30.398	12.368	26.1664	28.4013	14.6506	16.4706	26.7465	18.0076	16.9939	42.5449	16.4202	Csde1	3	103020426	103058186	+	10902	protein_coding	cold shock domain containing E1, RNA binding [Source:MGI Symbol;Acc:MGI:92356]	CSD
ENSMUSG00000015671	53.4071	24.8412	47.1929	18.9669	21.9974	30.2763	18.7804	29.6425	20.9907	29.2942	27.3352	18.5988	23.1501	23.8163	23.6358	25.6387	21.326	21.3345	Psma2	13	14613240	14674236	+	3673	protein_coding	proteasome (prosome, macropain) subunit, alpha type 2 [Source:MGI Symbol;Acc:MGI:104885]	-
ENSMUSG00000031584	62.0669	15.7944	73.2578	14.534	18.1432	16.0392	11.6183	13.7873	27.9007	25.7449	18.0189	15.5399	35.509	30.9696	22.8791	34.3038	17.1728	26.4118	Gsr	8	33652523	33698163	+	2754	protein_coding	glutathione reductase [Source:MGI Symbol;Acc:MGI:95804]	-
ENSMUSG00000029447	56.6116	29.3753	58.6346	20.2781	29.3944	23.4054	20.5859	20.2218	29.8844	19.7695	24.7706	19.0831	20.7876	24.2199	23.6501	19.6188	19.0185	20.3748	Cct6a	5	129786998	129846371	+	3620	processed_transcript	chaperonin containing Tcp1, subunit 6a (zeta) [Source:MGI Symbol;Acc:MGI:107943]	-
ENSMUSG00000025580	38.2823	29.3916	46.638	22.7483	27.828	27.0245	24.4783	28.7961	22.0535	30.6739	26.0504	22.3563	16.0479	17.3952	25.8527	25.002	24.8992	23.9466	Eif4a3	11	119288363	119300089	-	2122	protein_coding	eukaryotic translation initiation factor 4A3 [Source:MGI Symbol;Acc:MGI:1923731]	-
ENSMUSG00000007867	8.57335	15.7736	9.03845	19.9539	11.4735	13.7685	14.4304	20.2171	36.5488	16.8962	24.465	19.5636	47.4275	47.7662	44.659	61.3113	32.7484	34.5545	Ift43	12	86082541	86162459	+	1651	protein_coding	intraflagellar transport 43 [Source:MGI Symbol;Acc:MGI:1923661]	-
ENSMUSG00000072941	22.432	26.4539	8.20776	73.2851	29.1646	31.6848	32.3497	40.2771	22.0426	18.7901	31.1513	17.7678	17.8492	16.9488	27.8261	22.4833	16.6389	23.6997	Sod3	5	52363791	52371418	+	3738	protein_coding	superoxide dismutase 3, extracellular [Source:MGI Symbol;Acc:MGI:103181]	-
ENSMUSG00000097415	3.81138	35.387	32.6058	51.0261	31.1245	24.5031	39.9169	30.5418	16.5533	24.6804	24.391	39.9313	13.7885	13.6531	20.9553	12.4964	35.5309	27.6264	AU020206	7	75769038	75782099	-	3189	lincRNA	expressed sequence AU020206 [Source:MGI Symbol;Acc:MGI:2142134]	-
ENSMUSG00000107002	21.1883	30.4941	50.1478	19.8828	35.4482	19.9323	40.452	26.3991	14.5406	39.9889	32.7446	17.3233	18.0469	25.0865	14.7526	22.6552	31.1099	18.1329	0610012G03Rik	16	31947050	31948494	-	1445	protein_coding	RIKEN cDNA 0610012G03 gene [Source:MGI Symbol;Acc:MGI:1913301]	-
ENSMUSG00000047844	22.9771	46.1068	22.6779	28.0334	36.9497	41.0466	41.2069	39.4566	13.6925	22.0204	44.6728	4.58252	32.9793	16.7062	10.9153	3.38539	39.5822	11.1976	Bex4	X	136138996	136140443	+	837	protein_coding	brain expressed X-linked 4 [Source:MGI Symbol;Acc:MGI:3606746]	-
ENSMUSG00000032369	132.982	18.0893	50.1376	15.7415	16.4872	19.2006	31.1123	24.6042	17.2094	6.13735	16.3592	14.9559	24.4239	18.5461	20.0176	16.2109	16.6082	19.0507	Plscr1	9	92249750	92272278	+	2462	protein_coding	phospholipid scramblase 1 [Source:MGI Symbol;Acc:MGI:893575]	-
ENSMUSG00000032496	29.3438	3.19988	16.4364	3.00051	2.4932	10.9316	4.85805	2.58509	7.60016	8.85577	11.5739	363.3	1.46753	0.614683	3.76707	3.2154	2.53462	1.20477	Ltf	9	111019271	111042767	+	3450	protein_coding	lactotransferrin [Source:MGI Symbol;Acc:MGI:96837]	-
ENSMUSG00000024856	16.1754	23.7042	31.4503	18.1832	25.6385	35.3684	27.8553	25.0982	24.2531	34.1023	30.3326	29.7626	28.6581	40.1836	18.772	27.8596	19.1968	20.1008	Cdk2ap2	19	4097182	4099019	+	1636	protein_coding	CDK2-associated protein 2 [Source:MGI Symbol;Acc:MGI:1098779]	-
ENSMUSG00000037062	56.5596	29.2026	51.2245	17.2927	30.1705	27.8657	29.9772	29.2923	11.8485	27.6409	22.3793	13.4095	21.391	24.2646	18.1232	15.9704	32.2953	17.3105	Sh3glb1	3	144683678	144720335	-	7467	protein_coding	SH3-domain GRB2-like B1 (endophilin) [Source:MGI Symbol;Acc:MGI:1859730]	-
ENSMUSG00000055065	4.00589	24.0734	2.88961	39.5297	27.4399	24.5878	13.7192	25.1286	38.0554	25.5706	26.7109	36.5816	26.2705	28.5615	37.3758	34.1792	20.5134	40.483	Ddx17	15	79527736	79546741	-	7643	protein_coding	DEAD (Asp-Glu-Ala-Asp) box polypeptide 17 [Source:MGI Symbol;Acc:MGI:1914290]	-
ENSMUSG00000024835	15.8265	28.7601	10.3174	33.0297	32.3921	31.146	31.9425	31.0474	20.6809	29.191	32.2082	37.3617	24.912	18.2998	23.1279	22.2906	28.6614	23.6904	Coro1b	19	4148619	4154035	+	2372	protein_coding	coronin, actin binding protein 1B [Source:MGI Symbol;Acc:MGI:1345963]	-
ENSMUSG00000022400	25.186	31.597	33.6551	21.3654	30.0282	27.7274	24.6228	28.6775	24.2097	39.2949	31.1398	18.0004	21.9756	23.2406	24.0051	22.918	24.9786	21.1583	Rbx1	15	81466296	81476369	+	4551	protein_coding	ring-box 1 [Source:MGI Symbol;Acc:MGI:1891829]	-
ENSMUSG00000025228	30.0751	28.871	43.1892	26.5063	30.1359	26.0482	24.8033	31.0766	16.9403	36.0916	26.6837	20.3492	17.4781	28.8333	20.5076	21.3495	25.0634	19.498	Actr1a	19	46376814	46395735	-	2742	protein_coding	ARP1 actin-related protein 1A, centractin alpha [Source:MGI Symbol;Acc:MGI:1858964]	-
ENSMUSG00000022491	1.37048	0	0.839521	0	0	0	0	0	0.203523	0	0	470.486	0	0	0	0	0	0	Glycam1	15	103562759	103565081	-	2133	protein_coding	glycosylation dependent cell adhesion molecule 1 [Source:MGI Symbol;Acc:MGI:95759]	-
ENSMUSG00000024587	21.3362	25.8116	44.4953	20.2724	26.5117	25.861	28.3134	26.4035	18.0771	28.894	22.318	21.7672	28.4064	30.3908	20.8921	26.6627	33.3171	22.821	Nars	18	64499665	64516557	-	2632	protein_coding	asparaginyl-tRNA synthetase [Source:MGI Symbol;Acc:MGI:1917473]	-
ENSMUSG00000035212	19.1305	24.0612	12.2651	48.5504	33.5055	20.687	34.8841	32.9855	20.8137	28.345	23.7133	24.1438	25.8349	21.9622	27.7513	23.188	19.2723	30.53	Leprot	4	101647718	101659364	+	1898	protein_coding	leptin receptor overlapping transcript [Source:MGI Symbol;Acc:MGI:2687005]	-
ENSMUSG00000028675	35.7348	28.5241	26.433	19.4822	31.4003	29.0649	26.2258	31.3229	16.6349	14.8563	29.5682	29.7928	31.8103	26.8915	21.3008	26.3985	25.4893	20.5497	Pnrc2	4	135870918	135873850	-	2213	protein_coding	proline-rich nuclear receptor coactivator 2 [Source:MGI Symbol;Acc:MGI:106512]	-
ENSMUSG00000022186	4.07396	27.5597	10.1929	22.1209	28.0199	29.4889	20.0231	24.3602	25.8991	20.4136	30.8702	24.0872	34.0127	32.8219	36.9934	42.4351	25.0581	32.3927	Oxct1	15	4026383	4155344	+	3701	protein_coding	3-oxoacid CoA transferase 1 [Source:MGI Symbol;Acc:MGI:1914291]	-
ENSMUSG00000020386	27.3383	21.9536	16.171	30.9098	20.7925	15.7459	21.3015	25.4705	26.3582	30.6953	22.989	27.2487	30.0634	28.726	31.5798	42.7066	21.0011	29.6124	Sar1b	11	51763687	51791925	+	1255	protein_coding	secretion associated Ras related GTPase 1B [Source:MGI Symbol;Acc:MGI:1913647]	-
ENSMUSG00000040269	30.8495	28.5597	18.7532	18.8336	29.3766	27.877	24.7663	19.8483	28.7192	32.6578	30.8041	18.1505	23.7387	28.6072	32.7034	33.9558	18.5607	23.8877	Mrps28	3	8802146	8923918	-	783	protein_coding	mitochondrial ribosomal protein S28 [Source:MGI Symbol;Acc:MGI:1913480]	-
ENSMUSG00000018569	9.79361	13.1265	9.80533	20.212	16.422	15.3823	5.40406	9.33795	44.3029	14.9168	23.6378	23.2961	41.1222	50.7235	51.4797	61.3411	11.6965	48.0084	Cldn7	11	69964779	69967885	+	1948	protein_coding	claudin 7 [Source:MGI Symbol;Acc:MGI:1859285]	-
ENSMUSG00000030663	41.275	17.5069	41.8549	19.6634	24.7244	21.9931	22.8633	30.7818	20.8863	30.5417	24.3787	20.2197	20.3611	22.2233	25.2531	24.3334	36.9977	23.7297	1110004F10Rik	7	116039397	116105210	+	2490	protein_coding	RIKEN cDNA 1110004F10 gene [Source:MGI Symbol;Acc:MGI:1929274]	-
ENSMUSG00000009863	30.2349	26.5915	38.4959	20.1969	29.568	26.6507	30.6229	26.5026	18.652	28.8485	26.1323	29.2305	29.0557	19.2981	18.5439	27.7614	23.213	19.9653	Sdhb	4	140961203	140979193	+	2239	protein_coding	succinate dehydrogenase complex, subunit B, iron sulfur (Ip) [Source:MGI Symbol;Acc:MGI:1914930]	-
ENSMUSG00000073409	31.804	10.1823	15.9746	65.6756	4.49626	7.24771	18.07	7.41149	11.4515	10.2733	14.6678	132.994	30.8027	10.2028	21.9502	12.9252	28.0582	35.3749	H2-Q6	17	35424850	35430055	+	2085	protein_coding	histocompatibility 2, Q region locus 6 [Source:MGI Symbol;Acc:MGI:95935]	-
ENSMUSG00000005575	21.9978	24.7798	31.1998	24.379	27.2267	26.1932	21.4501	19.6311	19.8179	42.4096	32.2174	19.7162	27.2774	32.4183	23.0931	22.8673	29.7844	21.2133	Ube2m	7	13035120	13038275	-	2357	protein_coding	ubiquitin-conjugating enzyme E2M [Source:MGI Symbol;Acc:MGI:108278]	-
ENSMUSG00000038812	17.8436	22.4219	18.7832	22.2998	25.3178	32.4728	21.3445	28.0735	25.9131	16.1602	33.1332	28.4553	37.2373	23.9713	28.5254	33.7872	27.469	24.4233	Trmt112	19	6909698	6911049	+	1233	protein_coding	tRNA methyltransferase 11-2 [Source:MGI Symbol;Acc:MGI:1914924]	-
ENSMUSG00000017002	204.183	10.7949	122.617	7.81844	9.58275	0.109456	6.45619	4.04096	3.53178	29.1284	8.11745	4.61911	15.223	12.2994	7.99689	2.35024	8.87176	9.60033	Slpi	2	164354070	164389095	-	1180	protein_coding	secretory leukocyte peptidase inhibitor [Source:MGI Symbol;Acc:MGI:109297]	-
ENSMUSG00000030751	19.1276	25.3469	32.6353	22.9965	26.5516	25.289	26.0419	26.3233	27.1469	21.4307	29.3594	23.1825	29.1567	26.4229	28.9291	31.9416	21.3612	23.9776	Psma1	7	114264606	114276118	-	2952	protein_coding	proteasome (prosome, macropain) subunit, alpha type 1 [Source:MGI Symbol;Acc:MGI:1347005]	-
ENSMUSG00000044475	5.47225	28.311	9.96193	17.192	23.0929	11.838	20.7804	16.9116	42.1644	22.6392	21.5759	16.1093	35.8007	47.9578	42.2079	55.3678	13.3101	36.1413	Ascc1	10	60002805	60099988	+	2193	protein_coding	activating signal cointegrator 1 complex subunit 1 [Source:MGI Symbol;Acc:MGI:1916340]	-
ENSMUSG00000034936	37.406	43.5592	46.6463	36.5847	28.0429	20.654	28.6651	25.494	14.1354	40.37	39.6652	5.40468	25.4941	13.3308	19.6151	8.46312	17.378	15.6865	Arl4d	11	101665541	101667832	+	1382	protein_coding	ADP-ribosylation factor-like 4D [Source:MGI Symbol;Acc:MGI:1933155]	-
ENSMUSG00000060147	32.6823	27.3699	26.9482	23.8117	29.1244	35.316	27.3495	25.108	15.9392	21.8263	27.139	16.4812	30.235	26.5989	26.0178	24.2983	25.7069	24.4693	Serpinb6a	13	33917918	34002794	-	5409	protein_coding	serine (or cysteine) peptidase inhibitor, clade B, member 6a [Source:MGI Symbol;Acc:MGI:103123]	-
ENSMUSG00000026814	19.1558	33.4254	15.3354	64.2632	25.6419	29.3222	29.0169	35.2076	15.2712	50.5356	29.9916	9.68468	19.532	15.2252	17.5893	13.9403	17.677	25.5692	Eng	2	32646595	32682669	+	4048	protein_coding	endoglin [Source:MGI Symbol;Acc:MGI:95392]	-
ENSMUSG00000035929	56.7175	19.4817	35.8232	55.938	11.9133	20.8961	15.847	10.5106	11.4047	4.60527	13.7365	64.3409	36.1473	12.8916	25.4612	17.4178	19.6412	32.854	H2-Q4	17	35379617	35385290	+	2596	protein_coding	histocompatibility 2, Q region locus 4 [Source:MGI Symbol;Acc:MGI:95933]	-
ENSMUSG00000018559	18.8969	24.951	32.8814	29.1641	30.0747	24.5057	24.5035	26.5879	24.7497	29.6021	31.4163	19.1695	31.4358	29.0655	26.3606	21.5515	16.8203	23.755	Ctdnep1	11	69981156	69990601	+	2182	protein_coding	CTD nuclear envelope phosphatase 1 [Source:MGI Symbol;Acc:MGI:1914431]	-
ENSMUSG00000078695	31.0295	30.1303	15.0479	18.3136	27.1492	28.6845	32.0928	21.9431	18.7613	41.8603	36.4363	24.6221	28.0587	21.4007	20.3906	29.4568	17.8901	22.1114	Cisd3	11	97685826	97688621	+	833	protein_coding	CDGSH iron sulfur domain 3 [Source:MGI Symbol;Acc:MGI:101788]	-
ENSMUSG00000030738	43.733	22.0638	37.3678	18.0109	28.1324	27.4428	26.3931	25.7539	18.7197	23.41	21.5295	26.4372	25.8776	24.3867	20.1451	28.3672	25.888	21.3787	Eif3c	7	126546455	126566411	-	3511	protein_coding	eukaryotic translation initiation factor 3, subunit C [Source:MGI Symbol;Acc:MGI:1926966]	-
ENSMUSG00000037197	61.9896	23.3044	51.5741	17.1264	27.929	18.6353	26.3207	24.71	16.3538	23.7504	21.5934	16.8884	22.3208	23.0363	24.7367	22.0098	21.662	19.8072	Rbm17	2	11585437	11604153	-	2405	protein_coding	RNA binding motif protein 17 [Source:MGI Symbol;Acc:MGI:1924188]	-
ENSMUSG00000020519	22.1893	35.0862	49.1625	23.9832	25.3582	22.5549	24.911	21.0208	15.2374	39.5278	32.0847	17.7493	33.985	24.3549	18.5209	16.3948	25.2528	16.2857	Sap30l	11	57801637	57810217	+	1151	protein_coding	SAP30-like [Source:MGI Symbol;Acc:MGI:1354709]	-
ENSMUSG00000027800	35.9228	19.9228	21.708	26.8815	16.042	8.19065	13.8415	19.6841	27.6132	10.5299	14.4984	27.6598	42.2999	41.8191	29.3952	52.9898	18.4017	35.7966	Tm4sf1	3	57285611	57301988	-	4163	protein_coding	transmembrane 4 superfamily member 1 [Source:MGI Symbol;Acc:MGI:104678]	-
ENSMUSG00000025544	16.4402	30.3991	12.7948	35.3048	21.4943	13.8428	10.6996	21.6849	39.2897	13.8416	37.292	29.9397	19.5098	25.8086	41.7604	37.4695	19.8596	35.4378	Tm9sf2	14	122107038	122159604	+	3107	protein_coding	transmembrane 9 superfamily member 2 [Source:MGI Symbol;Acc:MGI:1915309]	-
ENSMUSG00000020737	35.0092	32.4032	37.886	24.0512	32.4703	31.6734	23.7196	25.9278	20.322	29.8249	27.173	31.6946	27.013	18.2869	18.2827	12.1756	15.7605	19.1517	Jpt1	11	115497353	115514387	-	2149	protein_coding	Jupiter microtubule associated homolog 1 [Source:MGI Symbol;Acc:MGI:1096361]	-
ENSMUSG00000020799	3.41477	10.7619	2.72321	11.3086	21.2718	5.09624	6.06322	8.98269	35.5428	4.70906	21.2738	23.5974	61.3599	52.6242	56.0087	75.6026	28.1706	34.2678	Tekt1	11	72344722	72362442	-	1622	protein_coding	tektin 1 [Source:MGI Symbol;Acc:MGI:1333819]	-
ENSMUSG00000028937	37.8117	42.0246	17.7608	38.0833	32.3065	26.5126	21.325	21.2442	15.4924	32.5212	36.6209	7.81257	19.9512	31.856	18.6594	24.9216	21.8025	15.7128	Acot7	4	152178134	152271855	+	2124	protein_coding	acyl-CoA thioesterase 7 [Source:MGI Symbol;Acc:MGI:1917275]	-
ENSMUSG00000071649	6.24643	28.1711	13.8692	33.0323	20.1624	14.5212	13.2372	14.7814	30.586	27.899	25.5174	31.7246	44.4467	33.5285	39.1953	31.6695	23.386	30.3395	B3gat3	19	8920374	8927234	+	1601	protein_coding	beta-1,3-glucuronyltransferase 3 (glucuronosyltransferase I) [Source:MGI Symbol;Acc:MGI:1919977]	-
ENSMUSG00000007721	26.7612	27.0382	19.4978	24.2003	26.7829	43.1795	33.3219	32.6969	17.5591	15.371	25.6531	20.5919	19.3837	31.6114	23.1154	25.3099	28.7569	21.0956	Ccdc124	8	70868227	70873935	-	1696	protein_coding	coiled-coil domain containing 124 [Source:MGI Symbol;Acc:MGI:1916403]	-
ENSMUSG00000033715	63.8883	15.8182	44.1547	11.1803	19.3949	9.5702	22.3231	16.0848	15.5472	14.4566	12.1497	11.0316	23.7681	31.3859	29.5043	43.1459	41.7508	35.9059	Akr1c14	13	4049011	4090688	+	3239	protein_coding	aldo-keto reductase family 1, member C14 [Source:MGI Symbol;Acc:MGI:2145458]	-
ENSMUSG00000055322	46.6368	27.128	46.4098	35.6413	30.4729	24.1536	22.4686	23.7386	12.2019	16.3868	21.3005	8.99536	13.0048	20.5103	19.469	15.7331	55.2878	20.9526	Tns1	1	73910231	74124449	-	16010	protein_coding	tensin 1 [Source:MGI Symbol;Acc:MGI:104552]	-
ENSMUSG00000021608	27.0707	47.3815	7.44835	76.2509	22.6802	17.9851	19.3478	32.3128	22.6055	33.0514	48.3843	8.68155	11.4096	7.95476	23.6871	13.1849	14.0657	26.8233	Lpcat1	13	73467197	73516422	+	4632	protein_coding	lysophosphatidylcholine acyltransferase 1 [Source:MGI Symbol;Acc:MGI:2384812]	-
ENSMUSG00000022564	35.0583	23.2351	61.4515	43.0169	15.9909	8.56054	13.7375	13.2005	23.3544	17.2713	15.1863	36.8195	22.3804	26.9314	25.9803	28.6423	16.207	33.1398	Grina	15	76246764	76249904	+	2067	protein_coding	glutamate receptor, ionotropic, N-methyl D-aspartate-associated protein 1 (glutamate binding) [Source:MGI Symbol;Acc:MGI:1913418]	-
ENSMUSG00000035984	9.59923	6.62288	0	11.9604	7.62117	8.84183	2.28057	8.11098	46.12	1.29498	17.9007	33.0973	38.7648	67.8211	44.7508	91.0079	22.9459	41.2793	Nme5	18	34562634	34579115	-	1154	protein_coding	NME/NM23 family member 5 [Source:MGI Symbol;Acc:MGI:1922783]	-
ENSMUSG00000026809	3.29541	20.8416	0	13.0798	8.92719	8.2993	5.19198	13.4759	46.724	16.2267	19.4659	25.2948	63.0424	24.6629	52.4815	75.8654	20.939	41.186	Spaca9	2	28692080	28699727	-	747	protein_coding	sperm acrosome associated 9 [Source:MGI Symbol;Acc:MGI:1917237]	-
ENSMUSG00000091523	10.9263	2.44491	2.5205	13.3157	6.30707	1.11557	6.11485	2.5423	36.829	12.5889	9.19251	179.786	42.6652	34.7889	27.9912	36.1039	13.5926	19.8273	AU040972	11	79481719	79484031	-	1042	antisense	expressed sequence AU040972 [Source:MGI Symbol;Acc:MGI:2144426]	-
ENSMUSG00000031871	36.3862	35.9193	36.6405	90.0054	26.7658	18.3458	29.1003	42.2079	19.3353	19.3187	24.7943	9.02974	5.61052	5.81819	19.0735	7.81761	8.61511	23.7827	Cdh5	8	104101625	104144511	+	4203	protein_coding	cadherin 5 [Source:MGI Symbol;Acc:MGI:105057]	-
ENSMUSG00000020592	43.9065	21.6753	27.2358	26.7098	16.8224	18.8871	10.8732	15.8801	36.3567	19.3553	25.8744	21.7719	22.7423	30.6734	32.9829	37.4648	13.063	35.7	Sdc1	12	8771323	8793715	+	3809	protein_coding	syndecan 1 [Source:MGI Symbol;Acc:MGI:1349162]	-
ENSMUSG00000040462	20.0145	18.4117	18.8447	30.4225	19.9616	23.8763	14.1202	18.8764	27.7741	32.4639	27.3477	29.6397	24.3761	34.4587	30.1993	38.6867	16.6776	31.8061	Os9	10	127095650	127121131	-	2629	protein_coding	amplified in osteosarcoma [Source:MGI Symbol;Acc:MGI:1924301]	-
ENSMUSG00000027502	28.3967	24.4097	41.9003	24.4802	29.9005	23.3012	31.9569	22.3428	23.676	27.3812	26.3633	18.1563	26.2839	17.2444	23.8309	22.0268	25.6663	20.3902	Rtf2	2	172440556	172469908	+	2644	protein_coding	replication termination factor 2 [Source:MGI Symbol;Acc:MGI:1913654]	-
ENSMUSG00000034845	31.5916	28.1595	23.4915	89.7171	12.6949	12.4803	38.4104	22.9756	16.9102	22.8135	19.8052	14.8128	12.5657	14.1746	25.9686	19.449	13.0165	38.4937	Plvap	8	71497765	71511752	-	1987	protein_coding	plasmalemma vesicle associated protein [Source:MGI Symbol;Acc:MGI:1890497]	-
ENSMUSG00000053559	20.598	36.1567	17.5319	25.0085	40.8635	40.2295	34.1556	30.7611	12.3355	47.069	31.6102	8.2183	21.2237	16.6129	14.0631	12.4366	29.4442	18.9552	Smagp	15	100621339	100636940	-	1464	protein_coding	small cell adhesion glycoprotein [Source:MGI Symbol;Acc:MGI:2448476]	-
ENSMUSG00000050299	32.5314	28.6353	30.5874	19.6066	37.2642	26.3456	14.1271	25.2607	17.0622	37.5875	49.3772	20.9907	24.6714	9.06687	34.1432	11.9978	18.3822	19.5639	Gm9843	16	76403251	76403652	-	402	processed_pseudogene	predicted gene 9843 [Source:MGI Symbol;Acc:MGI:3708621]	-
ENSMUSG00000018287	34.7212	24.4814	14.5998	20.4679	23.7045	36.8274	19.3733	32.8748	23.759	19.6338	30.4887	19.0142	27.2269	27.1799	24.895	27.6595	26.7958	23.018	Spag7	11	70663771	70669416	-	1480	protein_coding	sperm associated antigen 7 [Source:MGI Symbol;Acc:MGI:107380]	-
ENSMUSG00000031708	8.14565	22.3938	9.20821	36.1064	14.4242	10.434	21.1786	12.9371	40.063	17.8853	19.0147	47.5611	22.285	34.0578	38.1157	49.9151	17.8193	35.0956	Tecr	8	83571698	83607971	-	2191	protein_coding	trans-2,3-enoyl-CoA reductase [Source:MGI Symbol;Acc:MGI:1915408]	-
ENSMUSG00000006390	21.8986	29.8366	12.3496	63.5434	18.5068	26.2959	25.6095	28.5056	18.887	25.583	41.8268	15.8624	28.2665	17.455	20.0301	22.072	16.31	23.1851	Elovl1	4	118428093	118432953	+	2726	protein_coding	elongation of very long chain fatty acids (FEN1/Elo2, SUR4/Elo3, yeast)-like 1 [Source:MGI Symbol;Acc:MGI:1858959]	-
ENSMUSG00000037003	34.0895	31.3769	36.9394	29.2601	24.1439	18.7388	26.5241	23.1608	23.5212	18.6695	21.6966	13.2928	24.5392	20.6883	29.4394	23.9961	27.1532	28.7235	Tns2	15	102100413	102116401	+	5452	protein_coding	tensin 2 [Source:MGI Symbol;Acc:MGI:2387586]	-
ENSMUSG00000030711	15.1098	24.6689	25.2702	15.57	30.5908	28.4542	31.3427	35.4499	19.07	29.3087	23.7395	24.1657	14.1289	18.3816	29.6575	23.9635	35.2239	31.6911	Sult1a1	7	126672865	126676432	-	1507	protein_coding	sulfotransferase family 1A, phenol-preferring, member 1 [Source:MGI Symbol;Acc:MGI:102896]	-
ENSMUSG00000025208	29.2996	24.114	30.3124	22.3681	25.8149	34.1795	22.4958	20.5287	21.2584	36.9599	16.8398	18.2733	24.0144	36.9323	20.0141	25.9943	24.9774	20.0556	Mrpl43	19	45005014	45006442	-	1213	protein_coding	mitochondrial ribosomal protein L43 [Source:MGI Symbol;Acc:MGI:2137229]	-
ENSMUSG00000027937	25.7261	21.0775	14.1135	25.4562	23.483	19.4032	18.547	20.1867	33.7992	23.8603	21.7844	30.9072	35.1083	32.8106	32.5265	36.1497	13.8365	25.525	Jtb	3	90231597	90235838	+	1531	protein_coding	jumping translocation breakpoint [Source:MGI Symbol;Acc:MGI:1346082]	-
ENSMUSG00000043091	102.256	16.0904	77.3072	14.8337	19.7772	21.8557	5.63265	12.9346	21.1458	22.6525	23.9691	13.1521	21.3193	16.5459	19.974	17.0559	10.7705	17.0161	Tuba1c	15	99029891	99038110	+	2287	protein_coding	tubulin, alpha 1C [Source:MGI Symbol;Acc:MGI:1095409]	-
ENSMUSG00000036850	28.7611	25.289	28.9039	23.1511	28.1886	14.6903	17.0024	24.4622	25.8123	31.975	28.4613	26.2343	19.604	21.12	31.8795	28.7865	24.1329	24.8719	Mrpl41	2	24974117	24975098	-	888	protein_coding	mitochondrial ribosomal protein L41 [Source:MGI Symbol;Acc:MGI:1333816]	-
ENSMUSG00000001552	6.07194	33.9539	17.5842	35.9551	32.9313	34.6575	29.0115	32.7362	17.0651	45.0718	23.2746	9.46002	23.6215	24.5168	18.947	23.0439	24.3796	20.856	Jup	11	100368958	100397763	-	6436	protein_coding	junction plakoglobin [Source:MGI Symbol;Acc:MGI:96650]	-
ENSMUSG00000022820	32.682	32.8472	33.6457	21.9524	26.4315	24.6047	17.4228	26.5	26.056	30.6786	26.5021	16.9632	23.5651	19.0926	25.2967	21.0822	27.5762	20.077	Ndufb4	16	37647170	37654453	-	1916	protein_coding	NADH:ubiquinone oxidoreductase subunit B4 [Source:MGI Symbol;Acc:MGI:1915444]	-
ENSMUSG00000028719	33.1102	27.9204	53.337	19.8708	36.0588	29.0794	25.2728	26.3875	14.4705	20.9256	30.2684	16.6102	17.1767	21.4701	16.4923	14.9841	33.3471	16.0377	Cmpk1	4	114959336	114987241	-	3420	protein_coding	cytidine monophosphate (UMP-CMP) kinase 1 [Source:MGI Symbol;Acc:MGI:1913838]	-
ENSMUSG00000004849	16.9394	31.2515	20.476	21.3172	25.151	27.4416	30.0598	28.845	19.2765	41.247	30.6101	15.0991	26.1268	29.2157	22.7927	20.8734	24.1503	21.7652	Ap1s1	5	137034993	137046135	-	2198	protein_coding	adaptor protein complex AP-1, sigma 1 [Source:MGI Symbol;Acc:MGI:1098244]	-
ENSMUSG00000024338	15.9703	32.1071	17.9332	20.8559	23.5964	23.0841	32.553	19.9778	11.7732	42.8466	28.9777	37.0542	40.7364	22.8168	17.3702	12.1635	31.2404	21.1493	Psmb8	17	34197721	34201454	+	2736	protein_coding	proteasome (prosome, macropain) subunit, beta type 8 (large multifunctional peptidase 7) [Source:MGI Symbol;Acc:MGI:1346527]	-
ENSMUSG00000018927	79.1986	18.7134	52.9395	39.4583	24.2828	19.4996	31.4069	13.5282	8.31953	46.8998	29.8959	4.72347	16.8077	11.1128	18.0889	7.18763	17.2906	12.1681	Ccl6	11	83587882	83593087	-	1795	protein_coding	chemokine (C-C motif) ligand 6 [Source:MGI Symbol;Acc:MGI:98263]	-
ENSMUSG00000028757	18.2158	14.9545	12.7827	31.7303	22.9763	20.3485	11.1726	24.0749	28.0127	30.7028	25.5306	33.0994	34.3835	31.3847	25.8973	38.1071	15.8018	32.1576	Ddost	4	138304730	138312628	+	2120	protein_coding	dolichyl-di-phosphooligosaccharide-protein glycotransferase [Source:MGI Symbol;Acc:MGI:1194508]	-
ENSMUSG00000040809	83.3378	28.3876	44.4017	67.3246	14.3904	9.73432	8.23279	18.9915	13.8853	28.183	63.2181	2.00388	7.13958	23.4302	13.0622	9.01377	4.82984	11.7604	Chil3	3	106147554	106167564	-	1632	protein_coding	chitinase-like 3 [Source:MGI Symbol;Acc:MGI:1330860]	-
ENSMUSG00000030483	21.6358	13.2687	12.2093	28.5141	11.3029	12.0474	12.4611	8.57104	31.4076	6.44685	10.7646	33.7027	27.0593	41.2936	39.1353	58.5761	25.5419	56.2622	Cyp2b10	7	25897620	25926624	+	2112	protein_coding	cytochrome P450, family 2, subfamily b, polypeptide 10 [Source:MGI Symbol;Acc:MGI:88598]	-
ENSMUSG00000095585	233.247	0	133.92	2.44474	0	0	3.99561	11.3208	0	0	20.3438	30.1514	0.222294	3.18608	4.81165	2.70527	0	3.13458	CR974586.3	JH584293.1	41602	43114	-	312	protein_coding		-
ENSMUSG00000039199	3.35497	6.41859	1.3299	23.5374	16.3101	4.59201	5.84394	5.065	42.5163	8.8946	11.762	32.4603	33.9135	58.8723	56.485	77.1651	16.1724	44.642	Zdhhc1	8	105472423	105496902	-	4219	protein_coding	zinc finger, DHHC domain containing 1 [Source:MGI Symbol;Acc:MGI:1918046]	-
ENSMUSG00000019087	17.948	27.5022	9.9812	39.1907	24.3373	21.5121	18.3557	26.2923	31.7624	25.9549	30.7772	21.3347	21.0635	23.1706	33.9908	30.6425	13.1464	31.956	Atp6ap1	X	74297097	74304721	+	3026	protein_coding	ATPase, H+ transporting, lysosomal accessory protein 1 [Source:MGI Symbol;Acc:MGI:109629]	-
ENSMUSG00000030224	66.3715	31.3297	37.7457	18.4078	25.4284	17.221	20.1272	27.491	17.9266	32.0269	27.2266	16.9468	19.9763	14.8626	18.7949	19.3939	19.2115	17.9878	Strap	6	137735078	137751932	+	3090	protein_coding	serine/threonine kinase receptor associated protein [Source:MGI Symbol;Acc:MGI:1329037]	-
ENSMUSG00000042812	35.2941	38.7971	22.6896	44.9098	28.9739	23.7993	27.4161	35.7964	22.0383	28.5337	31.2525	4.61422	13.0958	14.4615	20.4605	8.98715	21.2663	26.019	Foxf1	8	121084386	121088144	+	2415	protein_coding	forkhead box F1 [Source:MGI Symbol;Acc:MGI:1347470]	Fork
ENSMUSG00000020484	46.2795	20.4805	44.4367	24.4569	26.5718	18.8885	20.2569	19.4929	28.7628	16.2058	19.6487	23.9661	26.222	23.3008	21.3274	24.6501	17.1015	26.1711	Xbp1	11	5520659	5525893	+	3248	protein_coding	X-box binding protein 1 [Source:MGI Symbol;Acc:MGI:98970]	TF_bZIP
ENSMUSG00000023966	4.99403	10.484	0	12.5834	12.7897	3.8699	2.16159	9.64604	50.3487	2.90217	15.0559	25.3033	41.6049	50.5509	61.4202	76.6217	19.2968	48.1771	Rsph9	17	46122035	46144216	-	1602	protein_coding	radial spoke head 9 homolog (Chlamydomonas) [Source:MGI Symbol;Acc:MGI:1922814]	-
ENSMUSG00000014769	30.2686	26.6331	24.7073	18.3309	24.6296	29.1765	26.889	24.694	22.1451	24.7533	31.2434	21.8611	22.0671	25.8736	23.1124	23.2364	26.6156	21.5321	Psmb1	17	15475021	15499751	-	4595	protein_coding	proteasome (prosome, macropain) subunit, beta type 1 [Source:MGI Symbol;Acc:MGI:104884]	-
ENSMUSG00000023067	132.549	21.6436	101.706	17.1847	14.4439	13.1957	9.5124	15.4337	16.6413	23.9745	12.8625	5.36356	24.7128	11.4337	8.24529	6.22741	4.12501	7.71868	Cdkn1a	17	29090976	29100727	+	3553	protein_coding	cyclin-dependent kinase inhibitor 1A (P21) [Source:MGI Symbol;Acc:MGI:104556]	-
ENSMUSG00000032057	5.85058	8.63067	0	10.7137	12.416	8.89371	1.28122	15.065	45.8654	3.07176	13.5212	27.843	47.4015	66.3387	49.5489	71.256	22.0247	36.8128	4833427G06Rik	9	51081115	51102078	-	973	protein_coding	RIKEN cDNA 4833427G06 gene [Source:MGI Symbol;Acc:MGI:1921013]	-
ENSMUSG00000021577	9.58327	22.4798	14.7272	19.992	24.3373	21.5994	36.1561	26.6021	19.7593	19.9609	23.3271	26.9978	30.7109	31.4649	24.7624	33.7828	32.5365	27.1894	Sdha	13	74322254	74350280	-	4126	protein_coding	succinate dehydrogenase complex, subunit A, flavoprotein (Fp) [Source:MGI Symbol;Acc:MGI:1914195]	-
ENSMUSG00000063529	1.69319	9.62247	2.71517	5.88932	11.2742	4.2642	1.42275	9.71782	36.3727	15.9589	13.1238	27.252	71.2386	58.7829	49.6898	71.745	23.6744	31.4815	Stmnd1	13	46273721	46300115	+	1363	protein_coding	stathmin domain containing 1 [Source:MGI Symbol;Acc:MGI:2686420]	-
ENSMUSG00000026185	2.40798	7.6823	4.01511	9.25283	10.878	13.4835	7.44925	7.04245	20.0361	3.87053	11.7019	46.317	121.864	43.7831	33.3798	31.369	15.7694	55.5269	Igfbp5	1	72857932	72874884	-	6006	protein_coding	insulin-like growth factor binding protein 5 [Source:MGI Symbol;Acc:MGI:96440]	-
ENSMUSG00000063787	13.7098	27.9226	16.285	14.7445	17.7557	31.2593	29.2572	22.5371	19.5806	31.7843	42.6579	27.4493	31.9693	28.7974	17.7893	28.9174	23.4399	19.6799	Chchd1	14	20703006	20704425	+	909	protein_coding	coiled-coil-helix-coiled-coil-helix domain containing 1 [Source:MGI Symbol;Acc:MGI:1913371]	-
ENSMUSG00000056121	47.832	29.7547	51.4161	25.2275	27.6065	27.4301	32.9829	24.8296	9.1551	22.112	25.9946	13.2116	12.0858	20.9638	17.5604	12.8039	29.8147	14.4641	Fez2	17	78377885	78418131	-	2020	protein_coding	fasciculation and elongation protein zeta 2 (zygin II) [Source:MGI Symbol;Acc:MGI:2675856]	-
ENSMUSG00000037060	19.8104	25.1501	21.9797	22.6848	29.7732	50.513	43.838	31.5594	15.2541	36.4661	33.1216	14.6242	22.1588	19.3788	17.2137	12.6236	15.2654	13.7793	Cavin3	7	105480083	105482300	-	1662	protein_coding	caveolae associated 3 [Source:MGI Symbol;Acc:MGI:1923422]	-
ENSMUSG00000075420	6.92187	29.4258	3.1737	18.9037	22.4323	13.3384	16.0042	15.8006	30.0063	16.1292	15.1041	30.3015	31.1321	36.1168	31.4457	62.4464	13.3487	52.4578	Smim6	11	115912017	115913920	+	978	protein_coding	small integral membrane protein 6 [Source:MGI Symbol;Acc:MGI:1915778]	-
ENSMUSG00000023039	48.5856	22.7556	50.2821	26.9696	23.692	18.1396	25.0148	15.1702	14.4972	11.8957	17.3377	13.5345	24.9028	29.5016	20.1775	21.7584	36.9361	23.0947	Krt7	15	101411043	101430313	+	7049	protein_coding	keratin 7 [Source:MGI Symbol;Acc:MGI:96704]	-
ENSMUSG00000020159	3.00693	16.5409	2.58061	11.7344	13.222	29.2584	9.72104	15.5582	56.4337	19.127	25.0835	31.1327	26.658	44.4878	41.3175	50.3984	16.3388	31.4823	Gabrp	11	33550781	33578959	-	3377	protein_coding	gamma-aminobutyric acid (GABA) A receptor, pi [Source:MGI Symbol;Acc:MGI:2387597]	-
ENSMUSG00000024740	16.2556	21.6643	34.8227	22.2652	24.0279	21.0756	29.6031	23.4198	23.5498	26.4954	18.8592	22.8837	26.4904	28.9326	19.5932	32.3281	25.2843	26.4897	Ddb1	19	10605625	10629813	+	4155	protein_coding	damage specific DNA binding protein 1 [Source:MGI Symbol;Acc:MGI:1202384]	-
ENSMUSG00000071533	34.821	23.1724	45.8741	21.9447	32.3913	28.4852	29.7039	31.976	15.2184	9.59494	24.2665	14.5944	16.0309	20.4662	22.2655	17.2447	35.9005	20.0674	Pcnp	16	56007245	56029739	-	3115	protein_coding	PEST proteolytic signal containing nuclear protein [Source:MGI Symbol;Acc:MGI:1923552]	-
ENSMUSG00000009079	24.5094	14.1046	23.1403	28.2483	15.2651	18.5417	18.2904	15.2029	28.7205	14.0269	14.6527	33.3822	27.639	34.0833	33.4382	39.3658	23.7273	36.4725	Ewsr1	11	5069689	5099266	-	5907	protein_coding	Ewing sarcoma breakpoint region 1 [Source:MGI Symbol;Acc:MGI:99960]	-
ENSMUSG00000009291	49.4064	22.2199	36.5499	32.8368	23.2081	18.4892	22.401	23.5048	20.67	13.6623	19.8245	18.6512	25.4025	15.2643	26.5962	20.2155	21.5063	32.278	Pttg1ip	10	77581720	77598732	+	3877	protein_coding	pituitary tumor-transforming 1 interacting protein [Source:MGI Symbol;Acc:MGI:2652132]	-
ENSMUSG00000002329	15.2189	29.6254	17.625	26.1332	25.5409	25.8697	29.5843	23.7704	24.4403	35.9548	31.4069	24.32	18.2947	27.8845	21.9739	18.2765	23.5776	22.8214	Mdp1	14	55657879	55660508	-	2032	protein_coding	magnesium-dependent phosphatase 1 [Source:MGI Symbol;Acc:MGI:1915131]	-
ENSMUSG00000001604	13.5172	16.8492	9.12403	14.1655	25.3352	22.5104	22.1623	16.9667	25.8609	26.8045	22.9985	14.5925	40.9695	38.8629	33.548	44.6998	26.7435	26.2835	Tcea3	4	136247729	136274898	+	1400	protein_coding	transcription elongation factor A (SII), 3 [Source:MGI Symbol;Acc:MGI:1196908]	-
ENSMUSG00000028195	38.4826	13.9267	18.0932	43.32	10.6268	13.37	12.1432	37.9189	36.0365	2.79621	14.004	22.4569	11.6795	20.6131	43.4448	15.0797	24.0344	63.7784	Cyr61	3	145646976	145649981	-	2019	protein_coding	cysteine rich protein 61 [Source:MGI Symbol;Acc:MGI:88613]	-
ENSMUSG00000030062	25.7106	24.3835	9.8954	26.9033	23.5619	20.7248	14.1216	18.3377	30.9423	31.3912	37.4963	21.9053	24.4559	21.1649	30.4011	34.9012	16.7599	28.5843	Rpn1	6	88084482	88105304	+	4512	protein_coding	ribophorin I [Source:MGI Symbol;Acc:MGI:98084]	-
ENSMUSG00000031812	27.754	23.2343	30.8415	16.8249	34.0198	29.0206	32.0074	32.9035	18.0415	21.4929	23.6736	19.3037	23.0663	21.6964	18.5846	24.2695	26.7228	18.182	Map1lc3b	8	121590361	121598760	+	7517	protein_coding	microtubule-associated protein 1 light chain 3 beta [Source:MGI Symbol;Acc:MGI:1914693]	-
ENSMUSG00000026457	39.4663	29.7995	46.6354	19.5813	22.6759	26.0115	28.0888	24.8126	15.8787	25.0142	27.6971	15.9409	20.8137	16.8413	17.2167	16.209	31.5194	17.3865	Adipor1	1	134415378	134433351	+	5025	protein_coding	adiponectin receptor 1 [Source:MGI Symbol;Acc:MGI:1919924]	-
ENSMUSG00000058173	2.75443	25.4189	20.5582	17.5571	26.9424	22.242	21.1374	21.5299	26.8685	21.9412	29.7121	16.4527	42.867	30.3387	25.7062	37.8283	22.8892	28.4518	Smco4	9	15493432	15545260	+	1173	protein_coding	single-pass membrane protein with coiled-coil domains 4 [Source:MGI Symbol;Acc:MGI:3039636]	-
ENSMUSG00000044502	23.8643	33.1737	13.7243	21.5192	32.627	41.717	26.3717	20.518	16.2133	17.0692	28.7108	15.4965	29.3202	33.2965	17.8979	22.4799	26.2204	20.2013	Bod1	11	31665181	31671885	-	1644	protein_coding	biorientation of chromosomes in cell division 1 [Source:MGI Symbol;Acc:MGI:1916806]	-
ENSMUSG00000027398	202.342	3.16663	198.946	0.990424	5.11867	3.1155	0.14527	1.94479	0.6374	5.8338	2.48117	0.571636	0.836489	1.98082	3.03643	0.91682	5.68336	2.67105	Il1b	2	129364570	129371139	-	1907	protein_coding	interleukin 1 beta [Source:MGI Symbol;Acc:MGI:96543]	-
ENSMUSG00000024990	11.7437	13.3858	8.83613	17.9789	23.6959	38.7374	19.8641	32.6794	34.9434	11.9061	32.1211	10.4905	25.6676	28.3068	37.4689	39.3248	22.2202	30.9156	Rbp4	19	38116620	38125321	-	1297	protein_coding	retinol binding protein 4, plasma [Source:MGI Symbol;Acc:MGI:97879]	-
ENSMUSG00000056692	19.5846	35.1402	26.712	24.265	30.5276	26.9944	36.2595	23.9838	16.3727	26.4442	27.2632	13.6083	22.7601	19.6919	20.6146	17.6864	33.5216	18.1126	D17Wsu92e	17	27751235	27820648	-	5287	protein_coding	DNA segment, Chr 17, Wayne State University 92, expressed [Source:MGI Symbol;Acc:MGI:106281]	-
ENSMUSG00000071172	47.4672	22.2898	40.2316	19.6209	22.1092	22.9243	21.341	23.3528	21.5656	20.1592	23.4345	19.418	22.5391	23.7681	22.7467	21.8594	20.3631	23.5294	Srsf3	17	29032628	29043373	+	7899	protein_coding	serine/arginine-rich splicing factor 3 [Source:MGI Symbol;Acc:MGI:98285]	-
ENSMUSG00000022553	16.4571	22.1024	28.2612	24.0791	26.3654	26.6669	33.5375	25.7	20.7339	23.5438	22.679	28.4395	27.3743	25.14	18.0497	25.5703	25.2245	18.5333	Maf1	15	76351294	76354380	+	2412	protein_coding	MAF1 homolog, negative regulator of RNA polymerase III [Source:MGI Symbol;Acc:MGI:1916127]	-
ENSMUSG00000022314	28.1388	28.1372	30.8887	22.6068	30.5103	22.1265	25.0714	28.6691	21.4185	19.6571	27.8422	18.5081	23.5338	21.1558	23.7773	16.8102	29.0441	19.7778	Rad21	15	51962240	51991747	-	4232	protein_coding	RAD21 cohesin complex component [Source:MGI Symbol;Acc:MGI:108016]	-
ENSMUSG00000025487	22.3697	28.3598	18.736	22.1782	27.8177	20.3088	18.6628	19.7942	23.6276	31.4194	24.6735	15.112	29.3895	33.1255	25.5297	26.8684	22.5753	26.8486	Psmd13	7	140881968	140898643	+	3377	protein_coding	proteasome (prosome, macropain) 26S subunit, non-ATPase, 13 [Source:MGI Symbol;Acc:MGI:1345192]	-
ENSMUSG00000036570	12.6687	28.1426	4.64194	26.5851	34.7503	35.5095	26.423	36.3147	20.0178	43.8282	25.1293	20.4089	32.5839	15.9158	19.1113	17.8991	22.4236	14.0927	Fxyd1	7	31051678	31057199	-	2186	protein_coding	FXYD domain-containing ion transport regulator 1 [Source:MGI Symbol;Acc:MGI:1889273]	-
ENSMUSG00000024309	18.6998	26.1	22.6151	22.5299	21.387	32.3707	22.7568	21.539	22.852	34.935	24.5707	22.8439	35.8697	24.8862	20.5654	26.7333	15.5887	19.5038	Pfdn6	17	33938821	33940343	-	1193	protein_coding	prefoldin subunit 6 [Source:MGI Symbol;Acc:MGI:95908]	-
ENSMUSG00000045092	73.1389	34.0746	32.9608	46.4935	18.7836	12.8055	27.421	30.7291	25.0265	29.4369	23.4901	14.5141	4.94098	5.72198	20.6858	5.42322	11.3214	19.0236	S1pr1	3	115710433	115715072	-	3046	protein_coding	sphingosine-1-phosphate receptor 1 [Source:MGI Symbol;Acc:MGI:1096355]	-
ENSMUSG00000099553	0	6.81123	0	7.40319	16.4155	0	7.05807	13.8734	51.6145	25.0302	24.9921	29.6594	39.4636	56.14	48.1743	60.9288	18.5657	29.6754	Gm29538	1	88443969	88462608	-	471	lincRNA	predicted gene 29538 [Source:MGI Symbol;Acc:MGI:5580244]	-
ENSMUSG00000032097	18.7842	31.8589	22.2862	21.4993	25.6561	23.9669	27.1685	28.5733	20.6387	23.5584	30.2336	20.6369	22.969	21.6915	25.4472	22.0071	26.0424	21.8988	Ddx6	9	44604892	44640731	+	8035	protein_coding	DEAD (Asp-Glu-Ala-Asp) box polypeptide 6 [Source:MGI Symbol;Acc:MGI:104976]	-
ENSMUSG00000001018	11.4887	18.8299	11.5731	21.1111	28.4875	22.7859	23.8318	29.6141	23.5067	20.6651	20.662	19.3762	30.3167	25.8426	29.5939	38.0688	31.2474	27.3859	Snapin	3	90488026	90491033	-	2290	protein_coding	SNAP-associated protein [Source:MGI Symbol;Acc:MGI:1333745]	-
ENSMUSG00000020224	71.319	19.7277	56.1594	13.6061	25.9231	23.9247	19.1799	20.1626	14.1719	19.49	18.4669	14.6799	12.561	21.8775	16.8738	17.3873	31.2843	17.4881	Llph	10	120227070	120232582	+	2181	protein_coding	LLP homolog, long-term synaptic facilitation (Aplysia) [Source:MGI Symbol;Acc:MGI:1913475]	-
ENSMUSG00000034957	9.80559	25.9514	14.447	26.4009	27.4981	29.4966	17.0253	19.3287	32.608	24.6297	31.4342	13.8462	27.5477	28.8111	30.8188	32.6374	16.9136	24.5951	Cebpa	7	35119293	35121928	+	2636	protein_coding	CCAAT/enhancer binding protein (C/EBP), alpha [Source:MGI Symbol;Acc:MGI:99480]	C/EBP
ENSMUSG00000007815	40.1368	26.3778	38.025	15.1075	33.5825	28.4202	32.1611	31.6376	11.2265	20.4954	21.8983	14.5842	22.4245	21.9133	13.1127	16.7415	31.3572	14.2031	Rhoa	9	108306129	108337934	+	7494	protein_coding	ras homolog family member A [Source:MGI Symbol;Acc:MGI:1096342]	-
ENSMUSG00000045193	45.6127	8.33402	50.8877	20.8391	14.4747	11.8544	26.4369	11.3261	19.2051	13.327	16.7523	19.7221	34.8644	16.1859	16.6529	33.27	31.3105	41.9076	Cirbp	10	80165985	80172786	+	2604	protein_coding	cold inducible RNA binding protein [Source:MGI Symbol;Acc:MGI:893588]	-
ENSMUSG00000027562	27.6963	35.8021	26.2715	41.8407	30.646	33.3827	33.685	29.8595	10.3241	20.9785	27.8268	3.75072	18.6992	19.0165	19.4805	13.616	22.6287	17.094	Car2	3	14886273	14900770	+	2422	protein_coding	carbonic anhydrase 2 [Source:MGI Symbol;Acc:MGI:88269]	-
ENSMUSG00000036138	9.79454	19.8373	12.0624	29.5414	21.8736	13.3137	16.0983	18.5647	33.5569	14.8215	23.2169	23.8643	31.4883	38.285	29.8129	43.8576	19.141	31.4623	Acaa1a	9	119339676	119350299	+	4414	protein_coding	acetyl-Coenzyme A acyltransferase 1A [Source:MGI Symbol;Acc:MGI:2148491]	-
ENSMUSG00000028494	43.9396	28.8816	52.8915	21.667	27.5189	16.586	21.2189	26.4505	17.4042	31.8664	27.5368	10.7029	24.5076	16.9073	14.8878	13.1496	19.0072	15.3507	Plin2	4	86648386	86670060	-	3512	protein_coding	perilipin 2 [Source:MGI Symbol;Acc:MGI:87920]	-
ENSMUSG00000022200	49.2221	20.4529	46.2931	18.5234	23.9465	21.6519	23.1354	24.536	18.5269	20.7493	20.4802	18.272	19.6973	24.152	17.8444	25.452	19.3609	18.1165	Golph3	15	12321450	12351591	+	3257	protein_coding	golgi phosphoprotein 3 [Source:MGI Symbol;Acc:MGI:1913879]	-
ENSMUSG00000020895	4.60776	7.85722	1.65684	9.76367	12.4956	9.7175	19.3253	7.09517	36.4035	13.7057	10.1158	21.942	45.9502	62.0107	37.6914	70.9021	17.543	41.0175	Tmem107	11	69070806	69073293	+	1369	protein_coding	transmembrane protein 107 [Source:MGI Symbol;Acc:MGI:1914160]	-
ENSMUSG00000019929	15.8124	19.7503	5.52116	21.4398	30.5104	29.1811	20.0962	36.407	40.4371	12.6568	36.3333	34.911	30.2823	15.7333	26.332	18.0309	17.5522	18.7764	Dcn	10	97479609	97518143	+	5838	protein_coding	decorin [Source:MGI Symbol;Acc:MGI:94872]	-
ENSMUSG00000028557	33.8169	26.9809	34.3326	19.8181	28.4521	29.6006	29.698	26.9071	17.5561	14.3727	26.99	12.5679	30.4723	19.805	19.9018	15.0757	23.1125	19.6627	Rnf11	4	109451098	109484728	-	4263	protein_coding	ring finger protein 11 [Source:MGI Symbol;Acc:MGI:1352759]	-
ENSMUSG00000020265	26.0207	28.9254	22.767	18.5678	27.2776	27.8078	24.5996	26.1047	18.9303	24.4532	20.4954	15.5541	28.5003	28.5	21.0243	20.7881	28.2328	20.3859	Sumo3	10	77606097	77618331	+	3660	protein_coding	small ubiquitin-like modifier 3 [Source:MGI Symbol;Acc:MGI:1336201]	-
ENSMUSG00000022956	21.1433	28.3258	17.1926	17.4795	30.4838	32.0275	29.1499	28.7924	17.9194	28.2918	28.0319	30.6084	16.3894	23.3896	17.6833	20.9421	22.7336	17.6471	Atp5o	16	91925214	91931687	-	1972	protein_coding	ATP synthase, H+ transporting, mitochondrial F1 complex, O subunit [Source:MGI Symbol;Acc:MGI:106341]	-
ENSMUSG00000029328	48.315	11.9854	49.0107	20.6111	17.1308	14.6368	13.2822	16.6598	20.9219	9.95999	14.6831	28.6677	29.2798	19.5043	26.6631	28.9682	23.6966	33.3321	Hnrnpdl	5	100033577	100039664	-	4818	protein_coding	heterogeneous nuclear ribonucleoprotein D-like [Source:MGI Symbol;Acc:MGI:1355299]	-
ENSMUSG00000030538	11.6243	27.6962	22.8081	17.885	27.1517	12.6746	15.3972	15.4136	24.8066	21.6299	27.8615	23.8951	37.1323	36.1999	26.5214	33.7439	20.9101	23.834	Cib1	7	80227147	80232813	-	2303	protein_coding	calcium and integrin binding 1 (calmyrin) [Source:MGI Symbol;Acc:MGI:1344418]	-
ENSMUSG00000029070	16.0287	19.4984	10.4324	46.0932	20.6674	18.3247	21.8358	23.6341	23.4166	19.2904	24.3624	20.0765	31.1127	22.2794	31.5887	31.4047	16.292	30.4435	Mxra8	4	155839680	155844088	+	2918	protein_coding	matrix-remodelling associated 8 [Source:MGI Symbol;Acc:MGI:1922011]	-
ENSMUSG00000088359	71.137	65.9474	29.524	6.63949	37.4115	13.8879	0	20.8888	1.86716	0	81.9002	3.47307	0	17.1021	14.2975	11.0205	33.1078	18.403	Gm24009	5	23674289	23674381	-	93	rRNA	predicted gene, 24009 [Source:MGI Symbol;Acc:MGI:5453786]	-
ENSMUSG00000000001	54.9952	26.2067	54.2004	16.2235	24.5023	24.9447	17.1976	27.0971	16.0498	19.1395	18.1138	15.62	21.2405	17.7561	18.1458	15.0445	25.41	14.3535	Gnai3	3	108107280	108146146	-	3262	protein_coding	guanine nucleotide binding protein (G protein), alpha inhibiting 3 [Source:MGI Symbol;Acc:MGI:95773]	-
ENSMUSG00000021190	16.2928	25.1019	10.3809	44.1554	21.8838	12.0651	19.7367	22.8454	29.0781	22.6588	34.1793	17.7627	19.3468	19.4276	32.0355	23.2798	21.4193	33.382	Lgmn	12	102394084	102439813	-	2323	protein_coding	legumain [Source:MGI Symbol;Acc:MGI:1330838]	-
ENSMUSG00000040242	29.0455	26.4334	34.4261	22.4427	27.5983	24.1594	25.5798	21.6216	18.6466	22.3959	25.1847	16.2232	24.3999	21.8367	23.8931	17.6468	25.4641	17.6267	Fgfr1op2	6	146577203	146599198	+	4619	protein_coding	FGFR1 oncogene partner 2 [Source:MGI Symbol;Acc:MGI:1914779]	-
ENSMUSG00000041355	40.362	22.4246	23.3124	29.7162	22.3469	17.5998	23.2592	19.1385	25.9444	25.0316	21.7313	21.8984	15.2553	24.887	23.7473	24.5166	17.3773	25.9713	Ssr2	3	88575876	88588419	+	1864	protein_coding	signal sequence receptor, beta [Source:MGI Symbol;Acc:MGI:1913506]	-
ENSMUSG00000079658	40.6753	25.1012	37.3999	15.5562	32.2261	21.0426	24.8557	25.5628	16.4407	29.7412	25.2853	16.5447	23.5388	16.0092	18.1719	15.7994	25.1532	15.2979	Eloc	1	16641725	16657042	-	3026	protein_coding	elongin C [Source:MGI Symbol;Acc:MGI:1915173]	-
ENSMUSG00000036275	27.0272	27.1673	15.828	31.5723	17.0363	18.8486	14.8769	23.1473	23.6287	17.9345	20.728	22.1471	24.2409	32.4316	28.9029	32.3943	16.3293	29.0539	9530068E07Rik	11	52396428	52408728	+	3296	protein_coding	RIKEN cDNA 9530068E07 gene [Source:MGI Symbol;Acc:MGI:2654705]	-
ENSMUSG00000024644	27.5181	24.1344	35.0985	24.546	24.4467	28.4647	29.7424	23.0862	14.7505	30.0904	19.8241	13.8519	23.075	18.8585	14.1288	22.9319	28.2474	20.1921	Cndp2	18	84667470	84685633	-	2119	protein_coding	CNDP dipeptidase 2 (metallopeptidase M20 family) [Source:MGI Symbol;Acc:MGI:1913304]	-
ENSMUSG00000041801	11.8425	26.2065	20.2157	34.9473	28.2066	28.1678	30.8304	24.5253	14.5912	34.9346	36.7904	13.4927	25.8917	20.7441	19.8917	16.9381	16.511	17.774	Phlda3	1	135766119	135769136	+	1559	protein_coding	pleckstrin homology like domain, family A, member 3 [Source:MGI Symbol;Acc:MGI:1351485]	-
ENSMUSG00000041548	58.5436	25.5486	24.5494	17.1551	16.4547	22.4536	18.3976	22.4606	20.5704	10.2182	27.1053	25.9846	27.5645	16.5167	18.7627	20.7455	29.0534	20.0404	Hspb8	5	116408491	116422864	-	1950	protein_coding	heat shock protein 8 [Source:MGI Symbol;Acc:MGI:2135756]	-
ENSMUSG00000031532	24.8457	16.7836	12.1866	28.8814	16.3662	17.3298	22.5104	17.3048	23.5362	22.9029	18.676	34.4334	24.8156	28.4178	28.1459	36.9472	16.2729	31.7343	Saraf	8	34154575	34170821	+	2929	protein_coding	store-operated calcium entry-associated regulatory factor [Source:MGI Symbol;Acc:MGI:1915137]	-
ENSMUSG00000022204	44.5068	30.2854	28.5771	18.3936	19.616	16.5475	27.5535	23.1623	20.7251	17.4667	29.8045	20.1192	20.6244	28.8677	19.5807	19.3916	15.5301	20.8831	Ngdn	14	55015454	55024137	+	1483	protein_coding	neuroguidin, EIF4E binding protein [Source:MGI Symbol;Acc:MGI:1916216]	-
ENSMUSG00000006818	140.972	8.00438	121.038	6.44561	8.72986	9.16288	8.62256	7.76441	11.1218	10.1207	8.61385	7.39069	10.797	12.8065	10.6031	16.1445	11.371	11.1768	Sod2	17	13006846	13040063	+	10008	protein_coding	superoxide dismutase 2, mitochondrial [Source:MGI Symbol;Acc:MGI:98352]	-
ENSMUSG00000047394	2.95874	9.92655	0	13.3126	11.1515	3.28739	2.89878	6.14322	37.6168	6.66813	19.517	29.5729	32.3635	55.213	48.7877	79.1461	23.4758	38.7905	Odf3b	15	89377449	89379282	-	1768	protein_coding	outer dense fiber of sperm tails 3B [Source:MGI Symbol;Acc:MGI:1917363]	-
ENSMUSG00000007659	68.7078	24.3193	61.408	20.4736	19.9573	15.8561	18.7868	19.6399	19.7652	18.4294	20.5846	8.52212	24.7419	12.7744	20.5483	11.2926	17.1877	17.4692	Bcl2l1	2	152780668	152831728	-	4586	protein_coding	BCL2-like 1 [Source:MGI Symbol;Acc:MGI:88139]	-
ENSMUSG00000001472	20.1524	20.4641	19.0698	27.8715	21.5527	18.8106	15.7274	19.4298	24.9193	17.3131	22.6313	27.588	28.0898	26.0287	29.022	30.726	20.1079	30.7777	Tcf25	8	123373753	123403835	+	5390	protein_coding	transcription factor 25 (basic helix-loop-helix) [Source:MGI Symbol;Acc:MGI:1914105]	-
ENSMUSG00000026234	57.0083	22.5701	56.4558	13.266	22.179	22.0968	25.0164	21.2522	11.1213	11.0339	18.8377	17.7738	16.9169	19.2411	16.9583	18.6228	31.8178	17.623	Ncl	1	86344719	86359400	-	10188	protein_coding	nucleolin [Source:MGI Symbol;Acc:MGI:97286]	-
ENSMUSG00000037706	21.0554	20.9752	15.2179	48.4839	19.571	22.0273	21.2655	25.9479	16.7072	22.9546	25.8949	31.3291	27.0052	21.6835	22.1837	21.1922	10.8231	25.1376	Cd81	7	143052739	143067934	+	2879	protein_coding	CD81 antigen [Source:MGI Symbol;Acc:MGI:1096398]	-
ENSMUSG00000064344	82.5016	31.4519	0	10.0017	8.40404	0	62.2312	25.5949	2.51661	0	88.6443	16.969	28.1444	19.2089	11.1893	20.0963	10.7096	1.77172	mt-Tm	MT	3845	3913	+	69	Mt_tRNA	mitochondrially encoded tRNA methionine [Source:MGI Symbol;Acc:MGI:102480]	-
ENSMUSG00000020717	17.6878	32.8457	17.5006	57.1189	27.529	22.7084	33.0718	36.6084	19.0431	24.8482	24.8672	14.6964	11.7709	12.1943	18.0991	8.84778	11.8652	27.8469	Pecam1	11	106654217	106750628	-	6228	protein_coding	platelet/endothelial cell adhesion molecule 1 [Source:MGI Symbol;Acc:MGI:97537]	-
ENSMUSG00000028780	9.17955	43.4115	6.23651	39.9032	31.9719	23.0096	31.9515	45.8951	14.0084	35.1859	29.8856	3.52287	16.863	13.4397	28.5229	8.27493	20.6476	17.1616	Sema3c	5	17574281	17730268	+	7140	protein_coding	sema domain, immunoglobulin domain (Ig), short basic domain, secreted, (semaphorin) 3C [Source:MGI Symbol;Acc:MGI:107557]	-
ENSMUSG00000082908	70.5419	29.8357	61.8133	13.208	26.3581	5.61556	10.9498	18.4982	22.6495	16.4077	4.56145	15.6391	17.2704	17.288	16.9535	24.7827	33.5893	13.0463	Gm13736	2	87526145	87526397	+	253	processed_pseudogene	predicted gene 13736 [Source:MGI Symbol;Acc:MGI:3650137]	-
ENSMUSG00000028798	25.7671	26.7366	28.6034	16.2183	22.4255	23.8639	26.1913	23.3279	19.9116	27.7191	21.2604	23.3718	27.0154	22.2155	23.8214	19.51	19.9613	20.4629	Eif3i	4	129591960	129600648	-	3702	protein_coding	eukaryotic translation initiation factor 3, subunit I [Source:MGI Symbol;Acc:MGI:1860763]	-
ENSMUSG00000025871	23.5102	25.5207	26.7453	14.5766	25.4125	24.559	32.1187	34.8833	13.1038	22.2471	20.3506	16.2283	26.898	27.4065	17.523	23.2113	28.7131	15.2795	4833439L19Rik	13	54551218	54565435	-	3187	protein_coding	RIKEN cDNA 4833439L19 gene [Source:MGI Symbol;Acc:MGI:1921162]	-
ENSMUSG00000014956	32.7926	26.3189	32.8505	18.5221	25.3373	22.5343	24.8775	24.5253	17.5667	16.6304	20.9385	17.3551	25.129	22.1712	23.4881	21.6008	24.9414	20.1862	Ppp1cb	5	32458843	32517433	+	10913	protein_coding	protein phosphatase 1 catalytic subunit beta [Source:MGI Symbol;Acc:MGI:104871]	-
ENSMUSG00000029922	26.3067	20.2995	34.074	18.2387	33.1154	19.6108	32.9826	23.2543	15.1975	20.3115	19.5244	14.5253	25.6393	22.0653	23.944	17.3709	27.662	23.4638	Mkrn1	6	39397804	39420462	-	4439	protein_coding	makorin, ring finger protein, 1 [Source:MGI Symbol;Acc:MGI:1859353]	-
ENSMUSG00000058076	14.8174	25.955	20.6435	20.7091	20.6675	33.3029	29.3225	21.2741	17.2577	28.4066	26.2768	15.951	28.7453	25.2236	22.2381	22.4274	22.8511	21.4155	Sdhc	1	171127165	171150603	-	3250	protein_coding	succinate dehydrogenase complex, subunit C, integral membrane protein [Source:MGI Symbol;Acc:MGI:1913302]	-
ENSMUSG00000030120	17.4988	24.8643	21.0209	25.5563	21.8196	26.0455	23.783	21.7423	18.0582	25.6388	18.6626	18.8303	28.0396	27.2119	25.9903	22.1862	30.3553	20.0473	Mlf2	6	124931386	124937238	+	4106	protein_coding	myeloid leukemia factor 2 [Source:MGI Symbol;Acc:MGI:1353554]	-
ENSMUSG00000030750	41.2131	22.7192	26.2294	16.6168	20.2892	23.0327	21.5745	24.1852	22.604	26.9871	14.0674	23.3619	32.2513	24.384	15.3625	23.4078	19.9245	19.133	Nsmce1	7	125467640	125491596	-	1329	protein_coding	NSE1 homolog, SMC5-SMC6 complex component [Source:MGI Symbol;Acc:MGI:1914961]	-
ENSMUSG00000034108	8.73346	19.0139	4.40474	21.3052	31.6364	14.9075	28.3057	18.379	26.8601	8.64003	28.3872	25.4393	30.8394	27.7747	32.3824	39.5841	16.4292	33.9644	Ccs	19	4825366	4839322	-	1057	protein_coding	copper chaperone for superoxide dismutase [Source:MGI Symbol;Acc:MGI:1333783]	-
ENSMUSG00000014867	50.2219	23.1791	35.6575	20.9452	14.6104	18.5805	9.96326	16.0403	23.6838	17.2068	24.6216	22.0392	29.0234	23.7734	23.296	28.0037	11.7493	24.2312	Surf4	2	26920040	26933928	-	3281	protein_coding	surfeit gene 4 [Source:MGI Symbol;Acc:MGI:98445]	-
ENSMUSG00000025232	10.7143	29.2616	8.91162	41.5809	27.0668	19.5419	22.068	23.4471	25.6641	17.3865	23.0694	27.186	22.0299	21.5479	25.8515	26.9125	14.7472	29.7251	Hexa	9	59539540	59565109	+	1996	protein_coding	hexosaminidase A [Source:MGI Symbol;Acc:MGI:96073]	-
ENSMUSG00000026578	4.59387	10.5279	1.87606	11.9678	15.2893	11.9753	7.32843	9.38995	27.7888	3.04432	16.8664	36.3137	55.8771	52.4194	35.7474	67.363	15.6774	32.6381	Ccdc181	1	164275585	164287847	+	1909	protein_coding	coiled-coil domain containing 181 [Source:MGI Symbol;Acc:MGI:1922145]	-
ENSMUSG00000030220	24.7862	26.5323	50.7032	14.1287	27.8559	21.9425	24.3435	16.45	6.91736	13.4237	19.8764	51.3491	38.7207	7.84221	17.6645	9.14751	23.7375	21.0074	Arhgdib	6	136923655	136941899	-	1707	protein_coding	Rho, GDP dissociation inhibitor (GDI) beta [Source:MGI Symbol;Acc:MGI:101940]	-
ENSMUSG00000025260	17.0686	29.2953	5.70227	17.9651	22.1885	23.5828	27.1053	28.2323	20.2676	27.7596	33.2522	22.5823	29.1209	29.8677	19.7609	19.7866	22.298	20.2806	Hsd17b10	X	152001845	152004442	+	1298	protein_coding	hydroxysteroid (17-beta) dehydrogenase 10 [Source:MGI Symbol;Acc:MGI:1333871]	-
ENSMUSG00000045948	6.06541	23.5889	39.602	21.6534	28.5293	20.7398	10.7882	28.0191	18.7838	20.7557	28.0744	16.0721	39.0127	34.1548	15.5073	23.246	17.7636	23.7445	Mrps12	7	28739641	28741820	-	1040	protein_coding	mitochondrial ribosomal protein S12 [Source:MGI Symbol;Acc:MGI:1346333]	-
ENSMUSG00000020946	36.1789	26.6946	34.4323	18.8171	19.9152	34.5238	28.2458	23.2517	16.6415	16.9808	22.5085	14.5007	21.0871	20.1896	15.497	22.1883	25.228	19.0772	Gosr2	11	103676849	103697898	-	3266	protein_coding	golgi SNAP receptor complex member 2 [Source:MGI Symbol;Acc:MGI:1927204]	-
ENSMUSG00000030682	22.6152	26.9379	24.9629	33.3371	20.0228	12.2082	22.4979	19.4865	25.8593	27.1618	22.3508	22.586	20.7907	21.3999	27.4366	19.445	17.2482	29.5717	Cdipt	7	126975914	126980501	+	2592	protein_coding	CDP-diacylglycerol--inositol 3-phosphatidyltransferase (phosphatidylinositol synthase) [Source:MGI Symbol;Acc:MGI:105491]	-
ENSMUSG00000021607	21.3355	24.1375	20.4622	17.3319	30.8836	28.0343	20.0435	25.7834	22.2853	30.0341	19.6814	18.2572	23.6563	30.8806	17.9919	29.3395	18.5643	16.8123	Mrpl36	13	73328513	73332178	+	1161	protein_coding	mitochondrial ribosomal protein L36 [Source:MGI Symbol;Acc:MGI:2137228]	-
ENSMUSG00000031167	67.692	17.3126	77.2234	10.6383	15.4495	15.2856	15.5969	12.7435	10.9776	9.36614	14.3458	21.2443	19.8117	13.4431	16.0687	21.7517	30.0955	26.2123	Rbm3	X	8138975	8145880	-	4698	protein_coding	RNA binding motif (RNP1, RRM) protein 3 [Source:MGI Symbol;Acc:MGI:1099460]	-
ENSMUSG00000039221	26.8414	23.4822	13.2044	13.7508	26.9677	19.8055	27.1597	25.4386	21.5202	34.8955	28.4886	24.2774	21.5844	18.9249	22.4274	17.0955	27.5549	21.8192	Rpl22l1	3	28805436	28807424	+	1989	protein_coding	ribosomal protein L22 like 1 [Source:MGI Symbol;Acc:MGI:1915278]	-
ENSMUSG00000027485	49.3848	0.626081	3.99363	1.58664	1.6032	6.21329	10.8376	8.1296	6.55314	3.12168	12.3796	306.698	0.594424	0	0.177878	0.933418	1.15772	0.135194	Bpifb1	2	154190818	154220369	+	3617	protein_coding	BPI fold containing family B, member 1 [Source:MGI Symbol;Acc:MGI:2137431]	-
ENSMUSG00000076498	17.1196	7.22665	5.34794	13.542	22.765	7.09248	13.2109	8.42192	8.15534	9.83797	11.1736	196.33	13.9313	6.99097	19.5867	9.75773	17.7978	25.2624	Trbc2	6	41546730	41548352	+	692	TR_C_gene	T cell receptor beta, constant 2 [Source:MGI Symbol;Acc:MGI:4835227]	-
ENSMUSG00000029432	8.00043	17.4644	17.3643	13.5118	18.8373	16.4852	22.8675	19.5871	25.4786	21.6161	23.8783	21.626	33.7448	35.015	26.9364	41.2814	21.5868	28.2432	Nipsnap2	5	129725063	129758327	+	2750	protein_coding	nipsnap homolog 2 [Source:MGI Symbol;Acc:MGI:1278343]	-
ENSMUSG00000019872	24.2889	18.0486	17.8636	28.7409	21.3886	16.95	16.3669	15.0948	21.0646	11.579	16.9335	24.8308	40.035	30.1667	25.5693	31.7648	23.4393	29.3436	Smpdl3a	10	57794335	57811830	+	2065	protein_coding	sphingomyelin phosphodiesterase, acid-like 3A [Source:MGI Symbol;Acc:MGI:1931437]	-
ENSMUSG00000028270	73.3805	38.7773	43.4626	13.8012	20.2051	16.1704	32.3164	16.2145	7.17774	9.6354	17.1548	13.2228	33.024	12.1162	14.9169	9.92034	25.3567	16.0018	Gbp2	3	142620602	142638008	+	2516	protein_coding	guanylate binding protein 2 [Source:MGI Symbol;Acc:MGI:102772]	-
ENSMUSG00000062619	10.0954	13.0017	30.08	16.2066	18.8981	28.9842	35.8102	18.5412	22.1046	34.6473	19.2341	16.3193	33.4947	23.3078	21.7277	27.4543	20.2036	22.6743	2310039H08Rik	17	46772635	46773396	+	762	protein_coding	RIKEN cDNA 2310039H08 gene [Source:MGI Symbol;Acc:MGI:1914351]	-
ENSMUSG00000006024	27.5117	23.5266	22.8291	23.1689	21.6217	23.3344	23.4882	22.5771	19.9743	27.8497	26.2145	18.6942	21.9645	19.4646	22.4319	24.6983	20.3642	22.958	Napa	7	16098458	16117975	+	3786	protein_coding	N-ethylmaleimide sensitive fusion protein attachment protein alpha [Source:MGI Symbol;Acc:MGI:104563]	-
ENSMUSG00000025647	27.6257	15.6544	15.968	28.5001	12.8393	15.1213	17.3091	15.1858	17.6964	16.0153	16.6614	94.3295	23.6235	18.6329	15.3122	25.5272	14.6807	21.8147	Shisa5	9	109038565	109057777	+	3297	protein_coding	shisa family member 5 [Source:MGI Symbol;Acc:MGI:1915044]	-
ENSMUSG00000046722	38.3928	20.7362	31.4755	20.6917	21.7143	19.1874	17.8564	20.8695	20.28	19.0611	19.6592	23.9793	24.6726	19.0187	26.0541	21.3176	21.0939	25.7906	Cdc42se1	3	95228732	95236409	+	3258	protein_coding	CDC42 small effector 1 [Source:MGI Symbol;Acc:MGI:1889510]	-
ENSMUSG00000014402	35.9557	17.9379	26.6746	18.3206	24.3209	16.4641	24.0498	20.0541	24.2341	25.4238	24.011	15.3364	28.1234	19.4442	24.5414	23.2543	22.1509	21.4047	Tsg101	7	46888949	46919969	-	2730	protein_coding	tumor susceptibility gene 101 [Source:MGI Symbol;Acc:MGI:106581]	-
ENSMUSG00000041035	10.4883	14.1888	6.52251	11.907	18.0213	8.86949	8.12341	11.995	28.2447	33.5421	20.0151	21.3509	42.3784	43.8814	32.2499	47.7173	27.472	24.511	Gm17018	19	45560615	45579763	+	1995	protein_coding	predicted gene 17018 [Source:MGI Symbol;Acc:MGI:4820566]	-
ENSMUSG00000047040	32.0808	18.52	23.0665	17.4156	17.7625	14.3875	8.93301	10.4667	30.564	21.1208	28.2114	11.7017	30.6913	28.0421	36.0043	35.7614	16.7647	29.9052	Prr15l	11	96928104	96937830	+	3923	protein_coding	proline rich 15-like [Source:MGI Symbol;Acc:MGI:2387599]	-
ENSMUSG00000036427	17.3122	21.717	29.808	19.0673	18.2598	23.3413	17.9476	18.9278	18.0052	26.5848	20.4445	31.0318	30.9801	24.8258	24.3647	24.4444	20.1578	24.158	Gpi1	7	34201330	34230336	-	6452	protein_coding	glucose phosphate isomerase 1 [Source:MGI Symbol;Acc:MGI:95797]	-
ENSMUSG00000024253	8.48291	12.3289	1.08199	13.1955	22.3367	9.95023	12.0311	19.7414	31.8045	7.39932	18.3044	22.5048	45.3642	41.1939	37.0935	58.1942	21.116	28.9617	Dync2li1	17	84626496	84655558	+	1324	protein_coding	dynein cytoplasmic 2 light intermediate chain 1 [Source:MGI Symbol;Acc:MGI:1913996]	-
ENSMUSG00000035048	16.8288	25.524	11.7522	17.7102	22.6064	28.9614	25.407	28.9017	19.0667	31.2951	35.6847	15.4058	24.4803	23.3076	17.0704	20.0371	28.0312	18.8405	Anapc13	9	102626296	102634425	+	2377	protein_coding	anaphase promoting complex subunit 13 [Source:MGI Symbol;Acc:MGI:1916260]	-
ENSMUSG00000059714	25.3144	18.9494	30.0822	18.4686	24.8882	18.7955	19.9656	20.2061	18.5471	15.2099	12.805	14.9886	37.2072	29.0463	24.0631	27.3832	27.3738	27.157	Flot1	17	35823230	35832791	+	2893	protein_coding	flotillin 1 [Source:MGI Symbol;Acc:MGI:1100500]	-
ENSMUSG00000044627	14.6343	25.3779	11.3552	15.2786	21.6066	23.221	20.761	22.9863	21.6627	20.4304	30.6027	14.7577	35.9836	24.8321	29.4089	34.9721	19.5469	22.8964	Swi5	2	32278816	32288075	-	5551	protein_coding	SWI5 recombination repair homolog (yeast) [Source:MGI Symbol;Acc:MGI:1920181]	-
ENSMUSG00000096544	13.9445	29.6465	20.9185	13.2778	24.5266	23.4123	46.869	23.743	9.70529	35.6171	20.9193	8.78236	21.3725	19.2205	23.3252	28.7783	29.0228	17.1124	Gm4617	3	124385667	124385997	+	331	processed_pseudogene	predicted pseudogene 4617 [Source:MGI Symbol;Acc:MGI:3704225]	-
ENSMUSG00000034341	18.1119	16.8397	11.5735	24.3404	21.3857	26.7097	22.8024	19.9007	21.2617	26.8642	16.31	19.6725	26.8735	31.5812	24.9767	28.6737	24.4229	26.4738	Wbp2	11	116078573	116086995	-	3177	protein_coding	WW domain binding protein 2 [Source:MGI Symbol;Acc:MGI:104709]	-
ENSMUSG00000021794	23.2792	28.5756	17.6943	20.2488	24.5634	29.5744	23.4587	27.6234	16.251	25.676	29.5228	18.6624	20.9221	17.8978	18.8686	20.1488	25.1295	20.5781	Glud1	14	34310727	34345265	+	4210	protein_coding	glutamate dehydrogenase 1 [Source:MGI Symbol;Acc:MGI:95753]	-
ENSMUSG00000063200	15.9834	22.8606	18.9932	19.1835	25.5922	22.0971	33.3582	26.5902	13.7504	23.2211	22.6785	20.6932	22.0437	23.4703	24.5856	18.7677	35.6106	18.7836	Nol7	13	43398390	43407097	+	2753	protein_coding	nucleolar protein 7 [Source:MGI Symbol;Acc:MGI:1917328]	-
ENSMUSG00000002767	28.4039	15.8872	40.7116	22.9728	22.3856	17.1107	28.8868	21.5096	16.7709	22.849	20.3191	19.7731	24.1856	17.1624	18.99	26.3313	22.3163	21.559	Mrpl2	17	46646229	46650139	+	1170	protein_coding	mitochondrial ribosomal protein L2 [Source:MGI Symbol;Acc:MGI:1351622]	-
ENSMUSG00000023959	26.3665	31.9103	18.4602	27.4958	32.8721	35.5765	44.589	31.5826	8.81874	14.8235	15.4407	4.45489	14.1839	16.0658	12.8599	13.3731	43.98	14.9876	Clic5	17	44188584	44280172	+	8782	protein_coding	chloride intracellular channel 5 [Source:MGI Symbol;Acc:MGI:1917912]	-
ENSMUSG00000026961	0	10.3077	0	13.4299	26.5575	21.4901	5.35435	6.90096	48.5188	19.5348	21.3353	40.3405	15.9693	30.3508	46.2445	57.8063	7.55525	36.0925	Lrrc26	2	25289915	25291180	+	1190	protein_coding	leucine rich repeat containing 26 [Source:MGI Symbol;Acc:MGI:2385129]	-
ENSMUSG00000010663	11.085	19.4117	7.63395	26.4427	18.4009	27.7674	25.7711	20.9259	18.5906	30.7973	28.2167	10.3506	40.5379	24.3529	20.1431	30.9294	19.3152	27.0367	Fads1	19	10182888	10196870	+	3456	protein_coding	fatty acid desaturase 1 [Source:MGI Symbol;Acc:MGI:1923517]	-
ENSMUSG00000032398	12.153	24.8183	24.0121	22.3906	28.569	43.3331	34.5159	32.718	13.6456	21.3642	29.885	14.1705	15.6446	17.2152	15.4734	18.1161	27.1797	12.4771	Snapc5	9	64179274	64183132	+	1228	protein_coding	small nuclear RNA activating complex, polypeptide 5 [Source:MGI Symbol;Acc:MGI:1914282]	-
ENSMUSG00000094162	92.1227	4.36831	130.434	0.448419	8.65046	12.3577	0	4.08808	3.48364	0	18.8779	93.9578	11.3453	0	5.03059	2.79115	13.3044	6.41429	Ccl19-ps3	4	42132559	42134171	+	324	unprocessed_pseudogene	chemokine (C-C motif) ligand 19, pseudogene 3 [Source:MGI Symbol;Acc:MGI:1891391]	-
ENSMUSG00000038587	131.375	14.4432	69.5104	12.6489	17.1274	20.5901	25.5762	25.858	8.56002	8.6094	21.3448	3.5619	6.14016	5.38493	8.51741	5.30011	15.2688	7.59364	Akap12	10	4266380	4359470	+	6461	protein_coding	A kinase (PRKA) anchor protein (gravin) 12 [Source:MGI Symbol;Acc:MGI:1932576]	-
ENSMUSG00000063704	0	8.46733	0	12.4994	12.1421	0.957471	1.08088	2.06717	48.442	1.87878	14.1385	35.3335	44.2167	55.6435	40.3152	65.9813	24.6514	39.4299	Mapk15	15	75993769	75999154	+	2563	protein_coding	mitogen-activated protein kinase 15 [Source:MGI Symbol;Acc:MGI:2652894]	-
ENSMUSG00000035847	20.8417	28.967	14.4632	18.4493	21.6749	23.1932	22.4838	25.0834	17.7186	13.4438	18.6648	12.5769	24.8409	32.4922	27.8578	27.3256	33.3918	23.734	Ids	X	70343069	70365084	-	5101	protein_coding	iduronate 2-sulfatase [Source:MGI Symbol;Acc:MGI:96417]	-
ENSMUSG00000024150	26.4474	25.4312	29.5707	27.0328	20.7205	14.6366	38.6589	25.4901	22.9689	15.2569	25.405	12.8605	18.7463	14.7916	21.9717	21.0734	20.6997	24.9927	Mcfd2	17	87254658	87265935	-	2612	protein_coding	multiple coagulation factor deficiency 2 [Source:MGI Symbol;Acc:MGI:2183439]	-
ENSMUSG00000020376	23.1078	20.2883	34.3275	22.2174	25.4333	18.5696	33.6062	23.7476	15.325	25.3651	23.6291	17.9327	26.2199	18.503	18.115	20.1995	24.8219	15.3269	Rnf130	11	50025346	50104758	+	1558	protein_coding	ring finger protein 130 [Source:MGI Symbol;Acc:MGI:1891717]	-
ENSMUSG00000027953	4.30289	22.4625	1.71008	38.527	15.9539	19.3825	14.8341	20.4192	22.3868	18.9152	27.3949	37.7581	29.1427	22.7833	27.0345	27.5947	19.9948	36.1354	Slc50a1	3	89268246	89270570	-	1466	protein_coding	solute carrier family 50 (sugar transporter), member 1 [Source:MGI Symbol;Acc:MGI:107417]	-
ENSMUSG00000020766	6.23734	21.7434	1.78306	20.1501	16.4973	18.0968	15.5657	13.0633	29.0233	20.4309	24.7882	22.226	38.9695	34.9735	29.5915	46.6959	18.2201	28.6638	Galk1	11	116008457	116012719	-	1406	protein_coding	galactokinase 1 [Source:MGI Symbol;Acc:MGI:95730]	-
ENSMUSG00000062554	44.0161	20.8028	57.0266	16.4926	21.5616	27.7978	23.6311	20.6271	12.7614	13.0745	9.99569	15.2596	19.4779	10.0884	18.3503	23.894	33.942	17.7544	Gm12751	4	34354043	34354423	+	381	processed_pseudogene	predicted gene 12751 [Source:MGI Symbol;Acc:MGI:3651049]	-
[truncated: 53,130 more rows]
