# Supplementary material for: Telomerase RNA component knockout exacerbates Staphylococcus aureus pneumonia by extensive inflammation and dysfunction of T cells
Source: eLife. 2024 Nov 28;13:RP100433. doi: 10.7554/eLife.100433 (PMC11604217; doi:10.7554/eLife.100433)
Supplement: Figure 5—figure supplement 1—source data 1. — List of significantly enriched KEGG pathways of Tercko/ko S. aureus vs. old wild-type (WT) S. aureus. [file elife-100433-fig5-figsupp1-data1.xlsx]

## Sheet: Tabelle1
KEGG pathway	Gene ratio	padj value	Count
TNF signaling pathway	0.0330645	0.000571136	41
Staphylococcus aureus infection	0.0169355	0.00392536	21
C-type lectin receptor signaling pathway	0.0298387	0.00502241	37
Complement and coagulation cascades	0.0233871	0.0116555	29
Cytokine-cytokine receptor interaction	0.0548387	0.0116555	68
IL-17 signaling pathway	0.0233871	0.0194632	29
Hematopoietic cell lineage	0.0225806	0.0423339	28
