# Supplementary material for: Telomerase RNA component knockout exacerbates Staphylococcus aureus pneumonia by extensive inflammation and dysfunction of T cells
Source: eLife. 2024 Nov 28;13:RP100433. doi: 10.7554/eLife.100433 (PMC11604217; doi:10.7554/eLife.100433)
Supplement: Figure 5—figure supplement 1—source data 2. — List of significantly enriched KEGG pathways of young wild-type (WT) S. aureus vs. young WT mock. [file elife-100433-fig5-figsupp1-data2.xlsx]

## Sheet: Tabelle1
KEGG pathway	Gene ratio	padj value	Count
T cell receptor signaling pathway	0.0730594	4.29654e-06	16
B cell receptor signaling pathway	0.0547945	6.50107e-05	12
Th17 cell differentiation	0.0639269	7.55243e-05	14
Cell adhesion molecules (CAMs)	0.0730594	0.000347757	16
Th1 and Th2 cell differentiation	0.0547945	0.000347757	12
Antigen processing and presentation	0.0410959	0.00803244	9
Natural killer cell mediated cytotoxicity	0.0502283	0.00803244	11
Leukocyte transendothelial migration	0.0502283	0.00803244	11
Staphylococcus aureus infection	0.0319635	0.0149737	7
Phagosome	0.0593607	0.0186526	13
Hematopoietic cell lineage	0.0410959	0.0200536	9
NF-kappa B signaling pathway	0.0410959	0.0302009	9
