# Supplementary material for: Telomerase RNA component knockout exacerbates Staphylococcus aureus pneumonia by extensive inflammation and dysfunction of T cells
Source: eLife. 2024 Nov 28;13:RP100433. doi: 10.7554/eLife.100433 (PMC11604217; doi:10.7554/eLife.100433)
Supplement: Figure 5—figure supplement 1—source data 3. — List of significantly enriched KEGG pathways of Tercko/ko S. aureus vs. Tercko/ko mock. [file elife-100433-fig5-figsupp1-data3.xlsx]

## Sheet: Tabelle1
KEGG pathway	Gene ratio	padj value	Count
TNF signaling pathway	0.0509554	9.46696e-07	32
Cytokine-cytokine receptor interaction	0.0764331	7.46824e-05	48
NF-kappa B signaling pathway	0.0398089	0.000133757	25
IL-17 signaling pathway	0.0350318	0.00115981	22
Chemokine signaling pathway	0.0557325	0.00115981	35
NOD-like receptor signaling pathway	0.0461783	0.0169674	29
Apoptosis	0.0382166	0.041749	24
