# Supplementary material for: Telomerase RNA component knockout exacerbates Staphylococcus aureus pneumonia by extensive inflammation and dysfunction of T cells
Source: eLife. 2024 Nov 28;13:RP100433. doi: 10.7554/eLife.100433 (PMC11604217; doi:10.7554/eLife.100433)
Supplement: Figure 5—figure supplement 1—source data 4. [file elife-100433-fig5-figsupp1-data4.xlsx]

## Sheet: Tabelle1
		Geometric Mean CD44	Normalized Geometric Mean CD44 (to unstained)
Young WT	Unstained control	0	0
	T cells	66592	66592
		66032	66032
		71137	71137
	T cells + S. aureus	70361	70361
		74682	74682
		72693	72693
	T cells + AM	70838	70838
		66211	66211
		65913	65913
	T cells + AM + S. aureus	70520	70520
		83061	83061
		70212	70212
Tercko/ko	Unstained control	0	0
	T cells	68906	68906
		62437	62437
		69040	69040
	T cells + S. aureus	63557	63557
		72072	72072
		72447	72447
	T cells + AM	71826	71826
		69223	69223
		63728	63728
	T cells + AM + S. aureus	65249	65249
		71496	71496
		70670	70670
