# Supplementary material for: Telomerase RNA component knockout exacerbates Staphylococcus aureus pneumonia by extensive inflammation and dysfunction of T cells
Source: eLife. 2024 Nov 28;13:RP100433. doi: 10.7554/eLife.100433 (PMC11604217; doi:10.7554/eLife.100433)
Supplement: Figure 5—figure supplement 1—source data 5. — List of relevant differentially expressed genes (DEGs). [file elife-100433-fig5-figsupp1-data5.xlsx]

## Sheet: Tabelle1
gene_name	Gene Number	ENSG	Tercko/ko mock vs Old mock	Tercko/ko S. aureus vs Young S. aureus	Tercko/ko S. aureus vs Old S. aureus	Tercko/ko S. aureus vs Tercko/ko mock
Ly6c1	1	ENSMUSG00000079018	1.0232	0.924884	1.45013	0
ITGAM	2	ENSMUSG00000030786	0	2.20746	2.48175	0
Ly6g	3	ENSMUSG00000022582	0	7.22219	4.33745	4.49913
