# Supplementary material for: Telomerase RNA component knockout exacerbates Staphylococcus aureus pneumonia by extensive inflammation and dysfunction of T cells
Source: eLife. 2024 Nov 28;13:RP100433. doi: 10.7554/eLife.100433 (PMC11604217; doi:10.7554/eLife.100433)
Supplement: Figure 5—source data 1. — One replicate of the group young wild-type (WT) T cell+alveolar macrophage (AM)+ S. aureus had to be excluded due to a staining error for the displayed surface marker. [file elife-100433-fig5-data1.xlsx]

## Sheet: Tabelle1
		Geometric Mean CD247	Normalized Geometric Mean CD247 (to unstained)
Young WT	Unstained control	1663	0
	T cells	2904	1241
		3188	1525
		3131	1468
	T cells + S. aureus	3098	1435
		3338	1675
		3958	2295
	T cells + AM	2896	1233
		2906	1243
		2735	1072
	T cells + AM + S. aureus	3605	1942
		3350	1687
Tercko/ko	Unstained control	0	0
	T cells	2096	2096
		1944	1944
		2285	2285
	T cells + S. aureus	2154	2154
		1900	1900
		1975	1975
	T cells + AM	2918	2918
		2493	2493
		1902	1902
	T cells + AM + S. aureus	3066	3066
		2345	2345
		2298	2298
