# Supplementary material for: Telomerase RNA component knockout exacerbates Staphylococcus aureus pneumonia by extensive inflammation and dysfunction of T cells
Source: eLife. 2024 Nov 28;13:RP100433. doi: 10.7554/eLife.100433 (PMC11604217; doi:10.7554/eLife.100433)
Supplement: Figure 5—source data 2. [file elife-100433-fig5-data2.xlsx]

## Sheet: Tabelle1
			IL-1α conc [pg/ml]
Young WT	2 hpi	T cell w/o	1.18
			0.32
			0.32
		T cell + S. aureus	0.36
			0.32
			0.32
	24 hpi	T cell w/o	0.32
			1.87
			0.32
		T cell + S. aureus	10.74
			22.04
			6.56
Tercko/ko	2 hpi	T cell w/o	0.32
			0.32
			0.32
		T cell + S. aureus	0.32
			0.32
			0.32
	24 hpi	T cell w/o	0.32
			0.32
			0.32
		T cell + S. aureus	0.5
			0.32
			0.32
Young WT	2 hpi	T cell + AM w/o	1.45
			2.85
			1.06
		T cell + AM + S. aureus	0.445
			0.32
			1.105
	24 hpi	T cell + AM w/o	0.32
			1.43
			1.69
		T cell + AM + S. aureus	3.465
			80.72
			30.36
Tercko/ko	2 hpi	T cell + AM w/o	1.57576
			10.8333
			2.81061
		T cell + AM + S. aureus	3.95455
			9.50758
			2.44697
	24 hpi	T cell + AM w/o	2.06818
			29.3864
			3.80303
		T cell + AM + S. aureus	6.0303
			10.9848
			33.1288
