# Supplementary material for: Telomerase RNA component knockout exacerbates Staphylococcus aureus pneumonia by extensive inflammation and dysfunction of T cells
Source: eLife. 2024 Nov 28;13:RP100433. doi: 10.7554/eLife.100433 (PMC11604217; doi:10.7554/eLife.100433)
Supplement: Supplementary file 1. [file elife-100433-supp1.xlsx]

## Sheet: Tabelle1
Supplemental Table 1. Overview of RNA concentrations measured with Nanodrop and integrity values measured with the Agilent Bioanalyzer
Sample Name	Concentration [ng/µl]	A260/280	A260/230	Integrity value
Tercko/ko mock_1	133.4	1.77	2.17	2
Tercko/ko mock_2	79.01	1.75	2.21	1.5
Tercko/ko mock_3	113.34	1.81	2.08	1.2
Tercko/ko S. aureus_1	156.46	1.81	2.22	1
Tercko/ko S. aureus_2	164.78	1.82	2.21	1.3
Tercko/ko S. aureus_3	222.27	1.82	2.25	1
Young_WT mock_1	80.28	1.76	2.26	1.3
Young_WT mock_2	217.81	1.85	2.2	1.4
Young_WT mock_3	206.49	1.82	1.88	1.6
Young_WT S. aureus_1	125.08	1.8	1.84	1.1
Young_WT S. aureus_2	141.49	1.78	2.2	1.2
Young_WT S. aureus_3	151.39	1.79	0.96	1.6
Old_WT mock_1	39.16	1.75	2.44	1.5
Old_WT mock_2	41.61	1.73	2.01	1.4
Old_WT mock_3	61.49	1.75	1.93	1.8
Old_WT S. aureus_1	81.71	1.79	2.17	1.7
Old_WT S. aureus_2	168.09	1.84	2.11	1.5
Old_WT S. aureus_3	77.99	1.77	2.02	2.4
