# Supplementary material for: Telomerase RNA component knockout exacerbates Staphylococcus aureus pneumonia by extensive inflammation and dysfunction of T cells
Source: eLife. 2024 Nov 28;13:RP100433. doi: 10.7554/eLife.100433 (PMC11604217; doi:10.7554/eLife.100433)
Supplement: Supplementary file 2. [file elife-100433-supp2.xlsx]

## Sheet: Tabelle1
Supplemental Table 2. Data quality summary of each sample sequenced.
Sample name	raw reads	raw bases	clean reads	clean bases	error rate	Q20	Q30	GC content [%]
Tercko/ko mock_1	50321426	7.55G	48003066	7.2G	0.03	97.56	93.51	45.46
Tercko/ko mock_2	48504168	7.28G	46572024	6.99G	0.03	97.6	93.36	42.14
Tercko/ko mock_3	45132550	6.77G	42980358	6.45G	0.03	97.27	92.77	41.89
Tercko/ko S. aureus_1	52336720	7.85G	49185306	7.38G	0.03	96.6	91.98	41.56
Tercko/ko S. aureus_2	46645006	7G	43312268	6.5G	0.03	97.43	93.12	42.1
Tercko/ko S. aureus_3	54450962	8.17G	50633442	7.6G	0.03	96.12	90.72	42.63
Young_WT mock_1	41860642	6.28G	39794438	5.97G	0.03	97.4	93.17	41.71
Young_WT mock_2	46657978	7G	44115872	6.62G	0.03	97.56	93.37	41.96
Young_WT mock_3	34829110	5.22G	33347686	5.0G	0.03	97.58	93.48	45.81
Young_WT S. aureus_1	43226168	6.48G	41066288	6.16G	0.03	97.22	92.72	44.48
Young_WT S. aureus_2	41717578	6.26G	40387022	6.06G	0.03	97.43	93.14	42.18
Young_WT S. aureus_3	47602708	7.14G	46388940	6.96G	0.02	97.99	94.27	46.1
Old_WT mock_1	49062702	7.36G	46302706	6.95G	0.03	97.26	92.86	44.72
Old_WT mock_2	45893606	6.88G	43152058	6.47G	0.03	97.45	93.29	45.1
Old_WT mock_3	59761306	8.96G	57093698	8.56G	0.03	96.98	91.86	44.36
Old_WT S. aureus_1	39890290	5.98G	37706700	5.66G	0.03	97.94	94.22	45.84
Old_WT S. aureus_2	44141600	6.62G	41400354	6.21G	0.03	97.88	93.91	41.3
Old_WT S. aureus_3	49812308	7.47G	46416472	6.96G	0.03	97.85	94.16	46.32
