# Supplementary material for: Telomerase RNA component knockout exacerbates Staphylococcus aureus pneumonia by extensive inflammation and dysfunction of T cells
Source: eLife. 2024 Nov 28;13:RP100433. doi: 10.7554/eLife.100433 (PMC11604217; doi:10.7554/eLife.100433)
Supplement: Supplementary file 3. [file elife-100433-supp3.xlsx]

## Sheet: Old_WT_mock vs Young_WT_mock
Supplemental Table 3a. DEG of Old WT mock mice vs. Young WT mock mice. All genes belonging to the respective pathways with a p value <0.05 are listed.
NLRP3 inflammasome signaling
gene_id	old_mock_1	old_mock_2	old_mock_3	WT_mock_1	WT_mock_2	WT_mock_3	old_mock	WT_mock	log2FoldChange	pvalue	padj	gene_name	gene_chr	gene_start	gene_end	gene_strand	gene_length	gene_biotype	gene_description	tf_family	old_mock_1_count	old_mock_2_count	old_mock_3_count	WT_mock_1_count	WT_mock_2_count	WT_mock_3_count	old_mock_1_fpkm	old_mock_2_fpkm	old_mock_3_fpkm	WT_mock_1_fpkm	WT_mock_2_fpkm	WT_mock_3_fpkm
ENSMUSG00000035352	74.4806	44.4245	34.114	0	9.219	6.43247	51.0064	5.21716	3.23033	0.00301059	0.0923831	Ccl12	11	82101845	82103400	+	537	protein_coding	chemokine (C-C motif) ligand 12 [Source:MGI Symbol;Acc:MGI:108224]	-	87	54	64	0	8	6	11.2364	6.66408	5.11195	0	1.31549	0.97009
ENSMUSG00000052684	437.467	472.216	544.225	1024.48	1274.53	725.797	484.636	1008.27	-1.05635	0.00422137	0.112538	Jun	4	95049034	95052222	-	3189	protein_coding	jun proto-oncogene [Source:MGI Symbol;Acc:MGI:96646]	TF_bZIP	511	574	1021	566	1106	677	11.1135	11.9283	13.7326	24.5843	30.6248	18.4319
ENSMUSG00000033420	281.657	248.448	345.938	832.615	761.72	395.597	292.014	663.31	-1.18185	0.00558028	0.129929	Antxr1	6	87133853	87335821	-	9537	protein_coding	anthrax toxin receptor 1 [Source:MGI Symbol;Acc:MGI:1916788]	-	329	302	649	460	661	369	2.39259	2.09853	2.91886	6.681	6.12016	3.35931
ENSMUSG00000078817	0	0	0	0	5.76188	48.2435	0	18.0018	-7.08931	0.00607858	0.133347	Nlrp12	7	3218784	3249740	-	7545	protein_coding	NLR family, pyrin domain containing 12 [Source:MGI Symbol;Acc:MGI:2676630]	-	0	0	0	0	5	45	0	0	0	0	0.0585173	0.517831
ENSMUSG00000032690	169.508	92.9624	133.258	0	35.7236	33.2344	131.909	22.986	2.49934	0.00745951	0.147733	Oas2	5	120730333	120749853	-	4451	protein_coding	2'-5' oligoadenylate synthetase 2 [Source:MGI Symbol;Acc:MGI:2180852]	-	198	113	250	0	31	31	3.08525	1.68245	2.40915	0	0.615003	0.604699
ENSMUSG00000095896	0	0	0	21.7204	0	18.2253	0	13.3152	-6.64572	0.0158624	0.212994	Ifna14	4	88571229	88571798	-	570	protein_coding	interferon alpha 14 [Source:MGI Symbol;Acc:MGI:3641425]	-	0	0	0	12	0	17	0	0	0	2.9161	0	2.58946
ENSMUSG00000052776	359.562	90.4944	60.2326	92.3116	38.0284	17.1532	170.096	49.1644	1.8013	0.0317104	0.291974	Oas1a	5	120896256	120907521	-	1885	protein_coding	2'-5' oligoadenylate synthetase 1A [Source:MGI Symbol;Acc:MGI:2180860]	-	420	110	113	51	33	16	15.4533	3.86725	2.57127	3.74761	1.54588	0.736959
ENSMUSG00000042349	213.169	226.236	205.217	39.8207	56.4664	167.244	214.874	87.8437	1.28213	0.0386655	0.315849	Ikbke	1	131254343	131279606	-	9018	protein_coding	inhibitor of kappaB kinase epsilon [Source:MGI Symbol;Acc:MGI:1929612]	-	249	275	385	22	49	156	1.91502	2.02089	1.83118	0.337915	0.479799	1.50193
ENSMUSG00000019905	0	0	1.06606	0	36.876	5.36039	0.355355	14.0788	-5.14709	0.0396466	0.319915	Gprc6a	10	51614823	51631461	-	2859	protein_coding	G protein-coupled receptor, family C, group 6, member A [Source:MGI Symbol;Acc:MGI:2429498]	-	0	0	2	0	32	5	0	0	0.0300052	0	0.988346	0.151842
ENSMUSG00000021948	675.462	505.946	495.187	209.964	241.999	448.128	558.865	300.03	0.894455	0.0417229	0.326439	Prkcd	14	30595354	30626210	-	5544	protein_coding	protein kinase C, delta [Source:MGI Symbol;Acc:MGI:97598]	-	789	615	929	116	210	418	9.87045	7.35144	7.18742	2.89821	3.34479	6.54618
ENSMUSG00000022610	407.503	547.08	616.185	246.164	213.189	410.606	523.589	289.986	0.851226	0.0471723	0.344827	Mapk12	15	89130584	89140703	-	3805	protein_coding	mitogen-activated protein kinase 12 [Source:MGI Symbol;Acc:MGI:1353438]	-	476	665	1156	136	185	383	8.67632	11.5821	13.0312	4.95085	4.29329	8.73935
ENSMUSG00000063376	0	0	0	25.3404	0	3.21623	0	9.51889	-6.155	0.0486028	0.349442	Ifna13	4	88643641	88644459	-	819	protein_coding	interferon alpha 13 [Source:MGI Symbol;Acc:MGI:2667155]	-	0	0	0	14	0	3	0	0	0	2.36777	0	0.318033
ENSMUSG00000024960	1471.63	2004.04	2153.98	600.93	790.529	1653.14	1876.55	1014.87	0.885851	0.0490832	0.3502	Plcb3	19	6953714	6969759	-	4201	protein_coding	phospholipase C, beta 3 [Source:MGI Symbol;Acc:MGI:104778]	-	1719	2436	4041	332	686	1542	28.3796	38.4278	41.2588	10.9466	14.4193	31.8689
Macrophage marker
gene_id	old_mock_1	old_mock_2	old_mock_3	WT_mock_1	WT_mock_2	WT_mock_3	old_mock	WT_mock	log2FoldChange	pvalue	padj	gene_name	gene_chr	gene_start	gene_end	gene_strand	gene_length	gene_biotype	gene_description	tf_family	old_mock_1_count	old_mock_2_count	old_mock_3_count	WT_mock_1_count	WT_mock_2_count	WT_mock_3_count	old_mock_1_fpkm	old_mock_2_fpkm	old_mock_3_fpkm	WT_mock_1_fpkm	WT_mock_2_fpkm	WT_mock_3_fpkm
ENSMUSG00000051439	481.128	880.264	401.906	224.444	291.551	415.966	587.766	310.654	0.917424	0.0483391	0.348529	Cd14	18	36725074	36726736	-	1572	protein_coding	CD14 antigen [Source:MGI Symbol;Acc:MGI:88318]	-	562	1070	754	124	253	388	24.7952	45.1078	20.5731	10.9261	14.2115	21.4296
ENSMUSG00000016498	0	0	0	21.7204	0	25.7299	0	15.8167	-6.8957	0.00865017	0.158988	Pdcd1lg2	19	29410919	29471157	+	1645	protein_coding	programmed cell death 1 ligand 2 [Source:MGI Symbol;Acc:MGI:1930125]	-	0	0	0	12	0	24	0	0	0	1.01044	0	1.26672
ENSMUSG00000002944	1766.99	1448.73	1588.97	3066.19	3875.44	1851.48	1601.56	2931.04	-0.871851	0.020347	0.23971	Cd36	5	17781690	17888801	-	3590	protein_coding	CD36 molecule [Source:MGI Symbol;Acc:MGI:107899]	-	2064	1761	2981	1694	3363	1727	39.8748	32.5076	35.6162	65.3604	82.7191	41.767
ENSMUSG00000014599	699.433	245.158	163.108	195.483	156.723	111.496	369.233	154.567	1.25763	0.036592	0.308722	Csf1	3	107741048	107760469	-	5281	protein_coding	colony stimulating factor 1 (macrophage) [Source:MGI Symbol;Acc:MGI:1339753]	-	817	298	306	108	136	104	10.7297	3.73956	2.48534	2.83272	2.27403	1.70983
Chemokine signaling
gene_id	old_mock_1	old_mock_2	old_mock_3	WT_mock_1	WT_mock_2	WT_mock_3	old_mock	WT_mock	log2FoldChange	pvalue	padj	gene_name	gene_chr	gene_start	gene_end	gene_strand	gene_length	gene_biotype	gene_description	tf_family	old_mock_1_count	old_mock_2_count	old_mock_3_count	WT_mock_1_count	WT_mock_2_count	WT_mock_3_count	old_mock_1_fpkm	old_mock_2_fpkm	old_mock_3_fpkm	WT_mock_1_fpkm	WT_mock_2_fpkm	WT_mock_3_fpkm
ENSMUSG00000025739	0	0	1.06606	57.921	8.06663	22.5136	0.355355	29.5004	-6.13822	0.000529446	0.0348038	Gng13	17	25717171	25719406	+	773	protein_coding	guanine nucleotide binding protein (G protein), gamma 13 [Source:MGI Symbol;Acc:MGI:1925616]	-	0	0	2	32	7	21	0	0	0.110977	5.73411	0.799635	2.35871
ENSMUSG00000034855	47.0855	33.7297	4.26425	1.81003	0	0	28.3598	0.603344	5.9166	0.00146297	0.0631531	Cxcl10	5	92346638	92348889	-	2252	protein_coding	chemokine (C-X-C motif) ligand 10 [Source:MGI Symbol;Acc:MGI:1352450]	-	55	41	8	1	0	0	1.69386	1.20652	0.152371	0.0615074	0	0
ENSMUSG00000047898	0	0	0	36.2006	2.30475	12.8649	0	17.1234	-7.00378	0.00181936	0.0697047	Ccr4	9	114490316	114504916	-	3093	protein_coding	chemokine (C-C motif) receptor 4 [Source:MGI Symbol;Acc:MGI:107824]	-	0	0	0	20	2	12	0	0	0	0.895665	0.0570983	0.33685
ENSMUSG00000035352	74.4806	44.4245	34.114	0	9.219	6.43247	51.0064	5.21716	3.23033	0.00301059	0.0923831	Ccl12	11	82101845	82103400	+	537	protein_coding	chemokine (C-C motif) ligand 12 [Source:MGI Symbol;Acc:MGI:108224]	-	87	54	64	0	8	6	11.2364	6.66408	5.11195	0	1.31549	0.97009
ENSMUSG00000048521	52.2221	60.0554	132.192	25.3404	14.9809	21.4416	81.4898	20.5876	1.99576	0.00746907	0.147778	Cxcr6	9	123806475	123811760	+	1931	protein_coding	chemokine (C-X-C motif) receptor 6 [Source:MGI Symbol;Acc:MGI:1934582]	-	61	73	248	14	13	20	2.19094	2.50531	5.50871	1.00425	0.594476	0.899255
ENSMUSG00000029053	429.762	825.145	498.918	284.175	177.466	318.407	584.608	260.016	1.16921	0.00871141	0.159533	Prkcz	4	155260129	155361361	-	6318	protein_coding	protein kinase C, zeta [Source:MGI Symbol;Acc:MGI:97602]	-	502	1003	936	157	154	297	5.51071	10.5206	6.35443	3.44204	2.15236	4.08142
ENSMUSG00000031834	483.696	405.58	326.749	188.243	160.18	236.929	405.341	195.118	1.05333	0.00952064	0.167716	Pik3r2	8	70768176	70776713	-	4176	protein_coding	phosphoinositide-3-kinase regulatory subunit 2 [Source:MGI Symbol;Acc:MGI:1098772]	-	565	493	613	104	139	221	9.38364	7.82361	6.29623	3.4496	2.93919	4.5948
ENSMUSG00000048480	0	0	0	23.5304	2.30475	8.57662	0	11.4706	-6.42517	0.00981375	0.170488	Cxcr1	1	74191785	74194631	-	1491	protein_coding	chemokine (C-X-C motif) receptor 1 [Source:MGI Symbol;Acc:MGI:2448715]	-	0	0	0	13	2	8	0	0	0	1.20771	0.118447	0.465851
ENSMUSG00000038811	24.8269	151.372	131.659	620.841	537.007	63.2526	102.619	407.033	-1.98572	0.013677	0.199777	Gngt2	11	95837216	95845734	+	1877	protein_coding	guanine nucleotide binding protein (G protein), gamma transducing activity polypeptide 2 [Source:MGI Symbol;Acc:MGI:893584]	-	29	184	247	343	466	59	1.07156	6.49642	5.64434	25.3119	21.9227	2.72912
ENSMUSG00000018930	0	0	1.06606	32.5806	4.6095	5.36039	0.355355	14.1835	-5.11759	0.0176378	0.225426	Ccl4	11	83662584	83664683	+	660	protein_coding	chemokine (C-C motif) ligand 4 [Source:MGI Symbol;Acc:MGI:98261]	-	0	0	2	18	4	5	0	0	0.129977	3.77767	0.535167	0.65775
ENSMUSG00000041112	77.905	125.047	160.976	269.695	353.779	189.758	121.309	271.077	-1.15745	0.0202752	0.239421	Elmo1	13	20090596	20608353	+	12580	protein_coding	engulfment and cell motility 1 [Source:MGI Symbol;Acc:MGI:2153044]	-	91	152	302	149	307	177	0.5017	0.800725	1.02969	1.64059	2.15492	1.2216
ENSMUSG00000033721	0	33.7297	7.99548	94.1216	99.1043	52.5318	13.9084	81.9192	-2.56072	0.0256481	0.266796	Vav3	3	109340653	109685698	+	6005	protein_coding	vav 3 oncogene [Source:MGI Symbol;Acc:MGI:1888518]	-	0	41	15	52	86	49	0	0.452472	0.107142	1.19946	1.26462	0.708464
ENSMUSG00000002489	416.92	454.94	315.022	195.483	191.294	256.227	395.627	214.335	0.882198	0.026398	0.270975	Tiam1	16	89787111	90143769	-	10048	protein_coding	T cell lymphoma invasion and metastasis 1 [Source:MGI Symbol;Acc:MGI:103306]	-	487	553	591	108	166	239	3.3615	3.64726	2.52283	1.48881	1.45882	2.06516
ENSMUSG00000022607	362.13	369.382	521.305	1124.03	717.93	479.219	417.606	773.726	-0.887543	0.0414231	0.325923	Ptk2	15	73205102	73423280	-	11803	protein_coding	PTK2 protein tyrosine kinase 2 [Source:MGI Symbol;Acc:MGI:95481]	-	423	449	978	621	623	447	2.4856	2.52101	3.55408	7.28777	4.66089	3.28814
ENSMUSG00000029375	5050.99	3732.48	6742.32	8651.95	10199.7	6924.55	5175.26	8592.06	-0.731271	0.0415149	0.325923	Cxcl15	5	90794534	90803067	+	2127	protein_coding	chemokine (C-X-C motif) ligand 15 [Source:MGI Symbol;Acc:MGI:1339941]	-	5900	4537	12649	4780	8851	6459	192.383	141.358	255.076	311.283	367.45	263.653
ENSMUSG00000021948	675.462	505.946	495.187	209.964	241.999	448.128	558.865	300.03	0.894455	0.0417229	0.326439	Prkcd	14	30595354	30626210	-	5544	protein_coding	protein kinase C, delta [Source:MGI Symbol;Acc:MGI:97598]	-	789	615	929	116	210	418	9.87045	7.35144	7.18742	2.89821	3.34479	6.54618
ENSMUSG00000024960	1471.63	2004.04	2153.98	600.93	790.529	1653.14	1876.55	1014.87	0.885851	0.0490832	0.3502	Plcb3	19	6953714	6969759	-	4201	protein_coding	phospholipase C, beta 3 [Source:MGI Symbol;Acc:MGI:104778]	-	1719	2436	4041	332	686	1542	28.3796	38.4278	41.2588	10.9466	14.4193	31.8689
T helper marker
gene_id	old_mock_1	old_mock_2	old_mock_3	WT_mock_1	WT_mock_2	WT_mock_3	old_mock	WT_mock	log2FoldChange	pvalue	padj	gene_name	gene_chr	gene_start	gene_end	gene_strand	gene_length	gene_biotype	gene_description	tf_family	old_mock_1_count	old_mock_2_count	old_mock_3_count	WT_mock_1_count	WT_mock_2_count	WT_mock_3_count	old_mock_1_fpkm	old_mock_2_fpkm	old_mock_3_fpkm	WT_mock_1_fpkm	WT_mock_2_fpkm	WT_mock_3_fpkm
ENSMUSG00000047898	0	0	0	36.2006	2.30475	12.8649	0	17.1234	-7.00378	0.00181936	0.0697047	Ccr4	9	114490316	114504916	-	3093	protein_coding	chemokine (C-C motif) receptor 4 [Source:MGI Symbol;Acc:MGI:107824]	-	0	0	0	20	2	12	0	0	0	0.895665	0.0570983	0.33685
ENSMUSG00000019256	328.742	379.254	312.357	899.586	908.072	347.353	340.118	718.337	-1.07792	0.0188068	0.229994	Ahr	12	35497974	35535038	-	6163	protein_coding	aryl-hydrocarbon receptor [Source:MGI Symbol;Acc:MGI:105043]	bHLH	384	461	586	497	788	324	4.32138	4.95712	4.07836	11.1702	11.2903	4.56444
ENSMUSG00000003882	79.6172	68.2822	138.588	9.05016	24.1999	52.5318	95.4959	28.5939	1.72331	0.0287807	0.280015	Il7r	15	9505788	9530176	-	4663	protein_coding	interleukin 7 receptor [Source:MGI Symbol;Acc:MGI:96562]	-	93	83	260	5	21	49	1.38325	1.1796	2.3916	0.148525	0.397674	0.912359
TCR signaling
gene_id	old_mock_1	old_mock_2	old_mock_3	WT_mock_1	WT_mock_2	WT_mock_3	old_mock	WT_mock	log2FoldChange	pvalue	padj	gene_name	gene_chr	gene_start	gene_end	gene_strand	gene_length	gene_biotype	gene_description	tf_family	old_mock_1_count	old_mock_2_count	old_mock_3_count	WT_mock_1_count	WT_mock_2_count	WT_mock_3_count	old_mock_1_fpkm	old_mock_2_fpkm	old_mock_3_fpkm	WT_mock_1_fpkm	WT_mock_2_fpkm	WT_mock_3_fpkm
ENSMUSG00000030742	499.962	531.449	306.493	38.0107	48.3998	137.226	445.968	74.5455	2.57034	8.27585e-06	0.00214122	Lat	7	126363824	126369570	-	2767	protein_coding	linker for activation of T cells [Source:MGI Symbol;Acc:MGI:1342293]	-	584	646	575	21	42	128	14.6382	15.4719	8.91332	1.05125	1.34034	4.01639
ENSMUSG00000032475	286.793	308.504	366.193	609.981	679.901	422.399	320.497	570.76	-0.831398	0.0289432	0.280414	Nck1	9	100492293	100546134	-	4792	protein_coding	non-catalytic region of tyrosine kinase adaptor protein 1 [Source:MGI Symbol;Acc:MGI:109601]	-	335	375	687	337	590	394	4.84854	5.18603	6.14923	9.74112	10.872	7.13862
ENSMUSG00000033721	0	33.7297	7.99548	94.1216	99.1043	52.5318	13.9084	81.9192	-2.56072	0.0256481	0.266796	Vav3	3	109340653	109685698	+	6005	protein_coding	vav 3 oncogene [Source:MGI Symbol;Acc:MGI:1888518]	-	0	41	15	52	86	49	0	0.452472	0.107142	1.19946	1.26462	0.708464
ENSMUSG00000031284	0	0	0	0	28.8094	21.4416	0	16.7503	-6.98511	0.00613277	0.133347	Pak3	X	143518591	143797796	+	9552	protein_coding	p21 (RAC1) activated kinase 3 [Source:MGI Symbol;Acc:MGI:1339656]	-	0	0	0	0	25	20	0	0	0	0	0.23111	0.18179
ENSMUSG00000074923	92.4587	244.335	95.9457	32.5806	27.657	85.7662	144.246	48.6679	1.55941	0.0278759	0.276309	Pak6	2	118663303	118698020	+	5211	protein_coding	p21 (RAC1) activated kinase 6 [Source:MGI Symbol;Acc:MGI:2679420]	-	108	297	180	18	24	80	1.43743	3.77708	1.4816	0.478462	0.40669	1.33292
ENSMUSG00000022610	407.503	547.08	616.185	246.164	213.189	410.606	523.589	289.986	0.851226	0.0471723	0.344827	Mapk12	15	89130584	89140703	-	3805	protein_coding	mitogen-activated protein kinase 12 [Source:MGI Symbol;Acc:MGI:1353438]	-	476	665	1156	136	185	383	8.67632	11.5821	13.0312	4.95085	4.29329	8.73935
ENSMUSG00000052684	437.467	472.216	544.225	1024.48	1274.53	725.797	484.636	1008.27	-1.05635	0.00422137	0.112538	Jun	4	95049034	95052222	-	3189	protein_coding	jun proto-oncogene [Source:MGI Symbol;Acc:MGI:96646]	TF_bZIP	511	574	1021	566	1106	677	11.1135	11.9283	13.7326	24.5843	30.6248	18.4319
ENSMUSG00000031834	483.696	405.58	326.749	188.243	160.18	236.929	405.341	195.118	1.05333	0.00952064	0.167716	Pik3r2	8	70768176	70776713	-	4176	protein_coding	phosphoinositide-3-kinase regulatory subunit 2 [Source:MGI Symbol;Acc:MGI:1098772]	-	565	493	613	104	139	221	9.38364	7.82361	6.29623	3.4496	2.93919	4.5948

## Sheet: Old_WT_Sa vs Old_WT_mock
Supplemental Table 3b. DEG of Old WT S. aureus mice vs. Old WT mock mice. All genes belonging to the respective pathways with a p value <0.05 are listed.
NLRP3 inflammasome signaling
gene_id	old_Sa_1	old_Sa_2	old_Sa_3	old_mock_1	old_mock_2	old_mock_3	old_Sa	old_mock	log2FoldChange	pvalue	padj	gene_name	gene_chr	gene_start	gene_end	gene_strand	gene_length	gene_biotype	gene_description	tf_family	old_Sa_1_count	old_Sa_2_count	old_Sa_3_count	old_mock_1_count	old_mock_2_count	old_mock_3_count	old_Sa_1_fpkm	old_Sa_2_fpkm	old_Sa_3_fpkm	old_mock_1_fpkm	old_mock_2_fpkm	old_mock_3_fpkm
ENSMUSG00000021270	5940.66	5038.58	3169.97	7696.68	10789.3	6487.32	4716.4	8324.43	-0.819827	0.0142559	0.999305	Hsp90aa1	12	110690605	110702728	-	3931	protein_coding	heat shock protein 90, alpha (cytosolic), class A member 1 [Source:MGI Symbol;Acc:MGI:96250]	-	6515	2409	4959	7088	10532	9686	99.919	75.4756	51.406	125.056	177.553	105.687
ENSMUSG00000032690	62.9172	39.7397	118.259	215.003	115.76	167.441	73.6385	166.068	-1.15347	0.0381333	0.999305	Oas2	5	120730333	120749853	-	4451	protein_coding	2'-5' oligoadenylate synthetase 2 [Source:MGI Symbol;Acc:MGI:2180852]	-	69	19	185	198	113	250	0.934605	0.525738	1.6937	3.08525	1.68245	2.40915
Macrophage marker
gene_id	old_Sa_1	old_Sa_2	old_Sa_3	old_mock_1	old_mock_2	old_mock_3	old_Sa	old_mock	log2FoldChange	pvalue	padj	gene_name	gene_chr	gene_start	gene_end	gene_strand	gene_length	gene_biotype	gene_description	tf_family	old_Sa_1_count	old_Sa_2_count	old_Sa_3_count	old_mock_1_count	old_mock_2_count	old_mock_3_count	old_Sa_1_fpkm	old_Sa_2_fpkm	old_Sa_3_fpkm	old_mock_1_fpkm	old_mock_2_fpkm	old_mock_3_fpkm
ENSMUSG00000061100	782.361	278.178	905.158	553.796	1415.76	2604.71	655.232	1524.75	-1.2164	0.0304743	0.999305	Retnla	16	48842551	48844461	+	599	protein_coding	resistin like alpha [Source:MGI Symbol;Acc:MGI:1888504]	-	858	133	1416	510	1382	3889	86.3569	27.3463	96.3296	59.0509	152.898	278.479
ENSMUSG00000014599	131.305	71.1132	328.567	887.16	305.28	204.947	176.995	465.796	-1.3871	0.034799	0.999305	Csf1	3	107741048	107760469	-	5281	protein_coding	colony stimulating factor 1 (macrophage) [Source:MGI Symbol;Acc:MGI:1339753]	-	144	34	514	817	298	306	1.64393	0.792932	3.96616	10.7297	3.73956	2.48534
ENSMUSG00000026390	4.55921	8.36626	15.3417	38.0056	27.6596	39.516	9.42238	35.0604	-1.87272	0.0410042	0.999305	Marco	1	120474538	120505024	-	1925	protein_coding	macrophage receptor with collagenous structure [Source:MGI Symbol;Acc:MGI:1309998]	-	5	4	24	35	27	59	0.156594	0.255919	0.508047	1.26102	0.929509	1.31463
Chemokine signaling
gene_id	old_Sa_1	old_Sa_2	old_Sa_3	old_mock_1	old_mock_2	old_mock_3	old_Sa	old_mock	log2FoldChange	pvalue	padj	gene_name	gene_chr	gene_start	gene_end	gene_strand	gene_length	gene_biotype	gene_description	tf_family	old_Sa_1_count	old_Sa_2_count	old_Sa_3_count	old_mock_1_count	old_mock_2_count	old_mock_3_count	old_Sa_1_fpkm	old_Sa_2_fpkm	old_Sa_3_fpkm	old_mock_1_fpkm	old_mock_2_fpkm	old_mock_3_fpkm
ENSMUSG00000018930	2.73553	54.3807	4.47465	0	0	1.33953	20.5303	0.446509	5.29884	0.00898304	0.999305	Ccl4	11	83662584	83664683	+	660	protein_coding	chemokine (C-C motif) ligand 4 [Source:MGI Symbol;Acc:MGI:98261]	-	3	26	7	0	0	2	0.27404	4.85179	0.432193	0	0	0.129977
ENSMUSG00000038811	177.809	663.026	221.176	31.4904	188.495	165.431	354.004	128.472	1.45619	0.034881	0.999305	Gngt2	11	95837216	95845734	+	1877	protein_coding	guanine nucleotide binding protein (G protein), gamma transducing activity polypeptide 2 [Source:MGI Symbol;Acc:MGI:893584]	-	195	317	346	29	184	247	6.26335	20.8002	7.51164	1.07156	6.49642	5.64434
ENSMUSG00000003283	105.774	566.814	246.106	77.0971	146.493	162.083	306.231	128.558	1.24438	0.0417533	0.999305	Hck	2	153108468	153151441	+	2092	protein_coding	hemopoietic cell kinase [Source:MGI Symbol;Acc:MGI:96052]	-	116	271	385	71	143	242	3.34297	15.9544	7.49933	2.35386	4.52997	4.96174
ENSMUSG00000033721	47.4158	175.691	42.8288	0	42.0016	10.0464	88.6453	17.3493	2.34829	0.0438853	0.999305	Vav3	3	109340653	109685698	+	6005	protein_coding	vav 3 oncogene [Source:MGI Symbol;Acc:MGI:1888518]	-	52	84	67	0	41	15	0.522068	1.72282	0.454658	0	0.452472	0.107142
ENSMUSG00000095320	46.504	16.7325	29.4048	40.1774	60.4413	167.441	30.8804	89.3531	-1.51959	0.0461259	0.999305	Ccl21a	JH584294.1	121048	121713	-	402	protein_coding	chemokine (C-C motif) ligand 21A (serine) [Source:MGI Symbol;Acc:MGI:1349183]	-	51	8	46	37	59	250	7.64858	2.45096	4.66289	6.3835	9.72628	26.6744
T helper marker
gene_id	old_Sa_1	old_Sa_2	old_Sa_3	old_mock_1	old_mock_2	old_mock_3	old_Sa	old_mock	log2FoldChange	pvalue	padj	gene_name	gene_chr	gene_start	gene_end	gene_strand	gene_length	gene_biotype	gene_description	tf_family	old_Sa_1_count	old_Sa_2_count	old_Sa_3_count	old_mock_1_count	old_mock_2_count	old_mock_3_count	old_Sa_1_fpkm	old_Sa_2_fpkm	old_Sa_3_fpkm	old_mock_1_fpkm	old_mock_2_fpkm	old_mock_3_fpkm
ENSMUSG00000028150	267.17	428.771	421.256	207.402	129.078	265.226	372.399	200.569	0.889116	0.0320597	0.999305	Rorc	3	94372794	94398276	+	3559	protein_coding	RAR-related orphan receptor gamma [Source:MGI Symbol;Acc:MGI:104856]	THR-like	293	205	659	191	126	396	4.96337	7.09413	7.54537	3.72211	2.34619	4.77252
ENSMUSG00000026011	0	58.5638	19.1771	0	0	4.01858	25.9136	1.33953	4.18695	0.0440636	0.999305	Ctla4	1	60887000	60915832	+	2330	protein_coding	cytotoxic T-lymphocyte-associated protein 4 [Source:MGI Symbol;Acc:MGI:88556]	-	0	28	30	0	0	6	0	1.48005	0.524673	0	0	0.110453
TCR signaling
gene_id	old_Sa_1	old_Sa_2	old_Sa_3	old_mock_1	old_mock_2	old_mock_3	old_Sa	old_mock	log2FoldChange	pvalue	padj	gene_name	gene_chr	gene_start	gene_end	gene_strand	gene_length	gene_biotype	gene_description	tf_family	old_Sa_1_count	old_Sa_2_count	old_Sa_3_count	old_mock_1_count	old_mock_2_count	old_mock_3_count	old_Sa_1_fpkm	old_Sa_2_fpkm	old_Sa_3_fpkm	old_mock_1_fpkm	old_mock_2_fpkm	old_mock_3_fpkm
ENSMUSG00000031284	8.20659	35.5566	7.03159	0	0	0	16.9316	0	6.64671	0.00146406	0.999305	Pak3	X	143518591	143797796	+	9552	protein_coding	p21 (RAC1) activated kinase 3 [Source:MGI Symbol;Acc:MGI:1339656]	-	9	17	11	0	0	0	0.0568048	0.219193	0.0469269	0	0	0
ENSMUSG00000033721	47.4158	175.691	42.8288	0	42.0016	10.0464	88.6453	17.3493	2.34829	0.0438853	0.999305	Vav3	3	109340653	109685698	+	6005	protein_coding	vav 3 oncogene [Source:MGI Symbol;Acc:MGI:1888518]	-	52	84	67	0	41	15	0.522068	1.72282	0.454658	0	0.452472	0.107142
ENSMUSG00000026011	0	58.5638	19.1771	0	0	4.01858	25.9136	1.33953	4.18695	0.0440636	0.999305	Ctla4	1	60887000	60915832	+	2330	protein_coding	cytotoxic T-lymphocyte-associated protein 4 [Source:MGI Symbol;Acc:MGI:88556]	-	0	28	30	0	0	6	0	1.48005	0.524673	0	0	0.110453
ENSMUSG00000002033	60.1816	169.417	116.341	56.4655	40.9771	58.2694	115.313	51.904	1.14051	0.0476766	0.999305	Cd3g	9	44969572	44980431	-	3269	protein_coding	CD3 antigen, gamma polypeptide [Source:MGI Symbol;Acc:MGI:88333]	-	66	81	182	52	40	87	1.21721	3.05171	2.26871	1.10324	0.810897	1.14152

## Sheet: Old_WT_Sa vs Young_WT_Sa
Supplemental Table 3c. DEG of Old WT S. aureus mice vs. Young WT S. aureus mice. All genes belonging to the respective pathways with a p value <0.05 are listed.
NLRP3 inflammasome signaling
gene_id	old_Sa_1	old_Sa_2	old_Sa_3	WT_Sa_1	WT_Sa_2	WT_Sa_3	old_Sa	WT_Sa	log2FoldChange	pvalue	padj	gene_name	gene_chr	gene_start	gene_end	gene_strand	gene_length	gene_biotype	gene_description	tf_family	old_Sa_1_count	old_Sa_2_count	old_Sa_3_count	WT_Sa_1_count	WT_Sa_2_count	WT_Sa_3_count	old_Sa_1_fpkm	old_Sa_2_fpkm	old_Sa_3_fpkm	WT_Sa_1_fpkm	WT_Sa_2_fpkm	WT_Sa_3_fpkm
ENSMUSG00000009292	12.0156	0	17.1485	114.209	42.1293	133.404	9.72136	96.5805	-3.25732	0.00206363	0.0810899	Trpm2	10	77907722	77970563	-	12459	protein_coding	transient receptor potential cation channel, subfamily M, member 2 [Source:MGI Symbol;Acc:MGI:1351901]	-	16	0	34	58	28	267	0.0774236	0	0.111204	0.772987	0.259357	0.865236
ENSMUSG00000034786	21.0273	52.2423	78.1769	318.996	121.874	191.362	50.4822	210.744	-2.0561	0.00217046	0.0832285	Gpsm3	17	34589806	34591754	+	1343	protein_coding	G-protein signalling modulator 3 (AGS3-like, C. elegans) [Source:MGI Symbol;Acc:MGI:2146785]	-	28	32	155	162	81	383	1.25695	2.93459	4.70304	20.0293	6.96038	11.5141
ENSMUSG00000024960	2232.65	1075.87	1467.71	667.53	929.855	677.011	1592.07	758.132	1.07144	0.00582275	0.130352	Plcb3	19	6953714	6969759	-	4201	protein_coding	phospholipase C, beta 3 [Source:MGI Symbol;Acc:MGI:104778]	-	2973	659	2910	339	618	1355	42.6657	19.3199	28.2269	13.3991	16.9769	13.0225
ENSMUSG00000038393	4517.12	4567.94	4392.53	2162.09	3195.81	2754.01	4492.53	2703.97	0.732021	0.00604222	0.131153	Txnip	3	96557957	96561883	+	3123	protein_coding	thioredoxin interacting protein [Source:MGI Symbol;Acc:MGI:1889549]	-	6015	2798	8709	1098	2124	5512	116.118	110.344	113.637	58.3792	78.4886	71.2597
ENSMUSG00000022610	756.983	342.84	915.426	198.88	234.721	420.696	671.75	284.766	1.23474	0.0175887	0.217529	Mapk12	15	89130584	89140703	-	3805	protein_coding	mitogen-activated protein kinase 12 [Source:MGI Symbol;Acc:MGI:1353438]	-	1008	210	1815	101	156	842	15.9714	6.79732	19.4377	4.40752	4.73144	8.93437
ENSMUSG00000055994	3.0039	13.0606	13.6179	55.1352	87.2679	10.4924	9.89413	50.9652	-2.36424	0.0299809	0.26335	Nod2	8	88647315	88688474	+	5014	protein_coding	nucleotide-binding oligomerization domain containing 2 [Source:MGI Symbol;Acc:MGI:2429397]	-	4	8	27	28	58	21	0.0480964	0.196507	0.219433	0.92726	1.33496	0.169099
ENSMUSG00000039193	3.0039	17.9583	18.1572	23.6294	52.6617	78.943	13.0398	51.7447	-2.01025	0.0405755	0.296848	Nlrc4	17	74425438	74459142	-	4729	protein_coding	NLR family, CARD domain containing 4 [Source:MGI Symbol;Acc:MGI:3036243]	-	4	11	36	12	35	158	0.050995	0.286481	0.31021	0.421347	0.854127	1.34895
ENSMUSG00000030161	1541	2259.48	1505.03	1252.36	1193.16	698.495	1768.5	1048	0.756067	0.0428724	0.30408	Gabarapl1	6	129533160	129542346	+	2013	protein_coding	gamma-aminobutyric acid (GABA) A receptor-associated protein-like 1 [Source:MGI Symbol;Acc:MGI:1914980]	-	2052	1384	2984	636	793	1398	61.4568	84.677	60.4057	52.4615	45.4625	28.0395
ENSMUSG00000046709	3.0039	16.3257	4.03494	106.332	7.5231	18.9863	7.78819	44.2805	-2.55118	0.046014	0.314313	Mapk10	5	102907948	103211334	-	11130	protein_coding	mitogen-activated protein kinase 10 [Source:MGI Symbol;Acc:MGI:1346863]	-	4	10	8	54	5	38	0.0216671	0.110657	0.0292899	0.805613	0.051844	0.137846
ENSMUSG00000037860	18.0234	24.4886	42.3668	49.2278	22.5693	254.816	28.2929	108.871	-1.94859	0.0470981	0.317396	Aim2	1	173350879	173466040	+	3501	protein_coding	absent in melanoma 2 [Source:MGI Symbol;Acc:MGI:2686159]	-	24	15	84	25	15	510	0.413291	0.527682	0.977711	1.1857	0.494451	5.88145
Macrophage marker
gene_id	old_Sa_1	old_Sa_2	old_Sa_3	WT_Sa_1	WT_Sa_2	WT_Sa_3	old_Sa	WT_Sa	log2FoldChange	pvalue	padj	gene_name	gene_chr	gene_start	gene_end	gene_strand	gene_length	gene_biotype	gene_description	tf_family	old_Sa_1_count	old_Sa_2_count	old_Sa_3_count	WT_Sa_1_count	WT_Sa_2_count	WT_Sa_3_count	old_Sa_1_fpkm	old_Sa_2_fpkm	old_Sa_3_fpkm	WT_Sa_1_fpkm	WT_Sa_2_fpkm	WT_Sa_3_fpkm
ENSMUSG00000026390	3.75488	6.53029	12.1048	80.7337	91.7818	165.88	7.46333	112.799	-3.88805	2.50588e-07	0.00015919	Marco	1	120474538	120505024	-	1925	protein_coding	macrophage receptor with collagenous structure [Source:MGI Symbol;Acc:MGI:1309998]	-	5	4	24	41	61	332	0.156594	0.255919	0.508047	3.53656	3.65698	6.96328
ENSMUSG00000031779	12.7666	81.6286	28.7489	147.684	191.087	661.022	41.048	333.264	-3.04615	0.000303889	0.0301642	Ccl22	8	94745590	94751699	+	2325	protein_coding	chemokine (C-C motif) ligand 22 [Source:MGI Symbol;Acc:MGI:1306779]	-	17	50	57	75	127	1323	0.440821	2.64862	0.999022	5.35631	6.30383	22.9744
ENSMUSG00000061100	644.337	217.132	714.184	3562.13	2408.9	439.682	525.218	2136.9	-2.02248	0.00596712	0.130865	Retnla	16	48842551	48844461	+	599	protein_coding	resistin like alpha [Source:MGI Symbol;Acc:MGI:1888504]	-	858	133	1416	1809	1601	880	86.3569	27.3463	96.3296	501.464	308.453	59.3147
ENSMUSG00000020826	7.50975	4.89772	16.6441	96.4866	82.7541	10.4924	9.68386	63.2444	-2.66199	0.0116887	0.180522	Nos2	11	78920787	78960254	+	4412	protein_coding	nitric oxide synthase 2, inducible [Source:MGI Symbol;Acc:MGI:97361]	-	10	3	33	49	55	21	0.136647	0.083745	0.304791	1.84412	1.43864	0.192172
ENSMUSG00000075122	10.5137	24.4886	9.07861	51.197	45.1386	38.4722	14.6936	44.9359	-1.65618	0.0337631	0.275952	Cd80	16	38455561	38496335	+	3703	protein_coding	CD80 antigen [Source:MGI Symbol;Acc:MGI:101775]	-	14	15	18	26	30	77	0.227935	0.498897	0.198081	1.16586	0.934956	0.839544
ENSMUSG00000055546	6.0078	0	9.07861	0	12.037	207.85	5.0288	73.2956	-3.83361	0.0383687	0.290171	Timd4	11	46810800	46844332	+	2173	protein_coding	T cell immunoglobulin and mucin domain containing 4 [Source:MGI Symbol;Acc:MGI:2445125]	-	8	0	18	0	8	416	0.221956	0	0.337548	0	0.424868	7.7293
ENSMUSG00000040809	183.238	104.485	237.557	545.444	1345.13	40.4708	175.093	643.682	-1.87528	0.0452757	0.31193	Chil3	3	106147554	106167564	-	1632	protein_coding	chitinase-like 3 [Source:MGI Symbol;Acc:MGI:1330860]	-	244	64	471	277	894	81	9.01377	4.82984	11.7604	28.183	63.2181	2.00388
Chemokine signaling
gene_id	old_Sa_1	old_Sa_2	old_Sa_3	WT_Sa_1	WT_Sa_2	WT_Sa_3	old_Sa	WT_Sa	log2FoldChange	pvalue	padj	gene_name	gene_chr	gene_start	gene_end	gene_strand	gene_length	gene_biotype	gene_description	tf_family	old_Sa_1_count	old_Sa_2_count	old_Sa_3_count	WT_Sa_1_count	WT_Sa_2_count	WT_Sa_3_count	old_Sa_1_fpkm	old_Sa_2_fpkm	old_Sa_3_fpkm	WT_Sa_1_fpkm	WT_Sa_2_fpkm	WT_Sa_3_fpkm
ENSMUSG00000026180	6.0078	0	6.55677	90.5792	49.6524	40.9704	4.18819	60.4007	-3.72838	0.000229288	0.0251713	Cxcr2	1	74153989	74161246	+	3048	protein_coding	chemokine (C-X-C motif) receptor 2 [Source:MGI Symbol;Acc:MGI:105303]	-	8	0	13	46	33	82	0.158238	0	0.173801	2.50594	1.24946	1.08619
ENSMUSG00000031779	12.7666	81.6286	28.7489	147.684	191.087	661.022	41.048	333.264	-3.04615	0.000303889	0.0301642	Ccl22	8	94745590	94751699	+	2325	protein_coding	chemokine (C-C motif) ligand 22 [Source:MGI Symbol;Acc:MGI:1306779]	-	17	50	57	75	127	1323	0.440821	2.64862	0.999022	5.35631	6.30383	22.9744
ENSMUSG00000029053	714.177	494.669	447.878	179.189	240.739	270.804	552.242	230.244	1.25688	0.00081337	0.051499	Prkcz	4	155260129	155361361	-	6318	protein_coding	protein kinase C, zeta [Source:MGI Symbol;Acc:MGI:97602]	-	951	303	888	91	160	542	9.07481	5.90658	5.72739	2.3916	2.92256	3.46359
ENSMUSG00000029530	3.75488	16.3257	6.55677	131.931	27.0832	58.9574	8.87912	72.6571	-3.08835	0.00121816	0.062576	Ccr9	9	123678439	123784330	+	10260	protein_coding	chemokine (C-C motif) receptor 9 [Source:MGI Symbol;Acc:MGI:1341902]	-	5	10	13	67	18	118	0.0293805	0.12004	0.051632	1.08431	0.202465	0.464345
ENSMUSG00000018012	810.302	386.92	678.374	161.467	106.828	302.781	625.199	190.359	1.70875	0.00125871	0.0637994	Rac3	11	120721470	120723969	+	1293	protein_coding	Rac family small GTPase 3 [Source:MGI Symbol;Acc:MGI:2180784]	-	1079	237	1345	82	71	606	50.3106	22.5747	42.3884	10.5304	6.337	18.9226
ENSMUSG00000029372	433.313	1482.38	1729.47	403.668	439.349	219.341	1215.05	354.12	1.7811	0.00203857	0.0802707	Ppbp	5	90768518	90770063	+	1083	protein_coding	pro-platelet basic protein [Source:MGI Symbol;Acc:MGI:1888712]	-	577	908	3429	205	292	439	32.1206	103.26	129.022	31.4306	31.1156	16.366
ENSMUSG00000021448	3.75488	0	2.52184	139.807	30.0924	2.49819	2.09224	57.4659	-4.67693	0.00220757	0.0841436	Shc3	13	51431041	51569419	-	4586	protein_coding	src homology 2 domain-containing transforming protein C3 [Source:MGI Symbol;Acc:MGI:106179]	-	5	0	5	71	20	5	0.0657314	0	0.0444282	2.5707	0.503292	0.0440192
ENSMUSG00000015950	229.798	308.556	176.024	665.56	389.696	554.599	238.126	536.619	-1.17713	0.00350815	0.103428	Ncf1	5	134220053	134229625	-	3663	protein_coding	neutrophil cytosolic factor 1 [Source:MGI Symbol;Acc:MGI:97283]	-	306	189	349	338	259	1110	5.03641	6.35474	3.8825	15.3217	8.15993	12.2347
ENSMUSG00000020395	10.5137	53.8749	46.9061	192.973	46.6432	459.168	37.0982	232.928	-2.66101	0.00364469	0.104244	Itk	11	46325150	46389515	-	5354	protein_coding	IL2 inducible T cell kinase [Source:MGI Symbol;Acc:MGI:96621]	-	14	33	93	98	31	919	0.157647	0.759117	0.707828	3.03931	0.668201	6.93017
ENSMUSG00000024960	2232.65	1075.87	1467.71	667.53	929.855	677.011	1592.07	758.132	1.07144	0.00582275	0.130352	Plcb3	19	6953714	6969759	-	4201	protein_coding	phospholipase C, beta 3 [Source:MGI Symbol;Acc:MGI:104778]	-	2973	659	2910	339	618	1355	42.6657	19.3199	28.2269	13.3991	16.9769	13.0225
ENSMUSG00000038607	0	0	0	49.2278	1.50462	2.99783	0	17.9101	-6.82425	0.00701701	0.139739	Gng10	4	59035088	59041903	+	1314	protein_coding	guanine nucleotide binding protein (G protein), gamma 10 [Source:MGI Symbol;Acc:MGI:1336169]	-	0	0	0	25	1	6	0	0	0	3.15916	0.0878271	0.184358
ENSMUSG00000045382	73.5956	135.504	127.101	297.336	168.517	384.722	112.067	283.525	-1.34563	0.00792403	0.147477	Cxcr4	1	128588199	128592293	-	1808	protein_coding	chemokine (C-X-C motif) receptor 4 [Source:MGI Symbol;Acc:MGI:109563]	-	98	83	252	151	112	770	3.26787	5.65396	5.6797	13.8678	7.14897	17.1949
ENSMUSG00000028874	23.2802	42.4469	53.9673	350.502	52.6617	108.422	39.8981	170.529	-2.08952	0.00981137	0.165813	Fgr	4	132974095	133001910	+	3863	protein_coding	FGR proto-oncogene, Src family tyrosine kinase [Source:MGI Symbol;Acc:MGI:95527]	-	31	26	107	178	35	217	0.483809	0.828937	1.12871	7.65108	1.0456	2.26799
ENSMUSG00000039936	87.1131	213.867	192.164	362.317	200.114	1053.74	164.381	538.723	-1.71731	0.0126142	0.185996	Pik3cd	4	149649168	149702571	-	6259	protein_coding	phosphatidylinositol-4,5-bisphosphate 3-kinase catalytic subunit delta [Source:MGI Symbol;Acc:MGI:1098211]	-	116	131	381	184	133	2109	1.11735	2.57774	2.48052	4.88136	2.45228	13.6044
ENSMUSG00000060216	156.954	233.458	245.627	478.495	273.841	621.051	212.013	457.796	-1.11372	0.0138676	0.195497	Arrb2	11	70432635	70440828	+	2845	protein_coding	arrestin, beta 2 [Source:MGI Symbol;Acc:MGI:99474]	-	209	143	487	243	182	1243	4.42895	6.19052	6.97541	14.1825	7.38266	17.6399
ENSMUSG00000025739	4.50585	0	2.52184	173.282	0	5.99567	2.34256	59.7592	-4.61132	0.0179724	0.220553	Gng13	17	25717171	25719406	+	773	protein_coding	guanine nucleotide binding protein (G protein), gamma 13 [Source:MGI Symbol;Acc:MGI:1925616]	-	6	0	5	88	0	12	0.46796	0	0.263581	18.903	0	0.62677
ENSMUSG00000071658	3.75488	0	3.53057	47.2587	4.51386	24.4823	2.42848	25.4183	-3.28425	0.0240027	0.24492	Gng3	19	8836929	8839246	-	1699	protein_coding	guanine nucleotide binding protein (G protein), gamma 3 [Source:MGI Symbol;Acc:MGI:102704]	-	5	0	7	24	3	49	0.177424	0	0.167891	2.34555	0.203775	1.16442
ENSMUSG00000009185	21.0273	153.462	68.0896	0	22.5693	14.9892	80.8596	12.5195	2.66433	0.0275434	0.256937	Ccl8	11	82115185	82116799	+	511	protein_coding	chemokine (C-C motif) ligand 8 [Source:MGI Symbol;Acc:MGI:101878]	-	28	94	135	0	15	30	3.3035	22.6558	10.7655	0	3.38762	2.37032
ENSMUSG00000047880	8.26073	8.16286	16.1397	0	31.597	282.296	10.8544	104.631	-3.26626	0.0283418	0.260266	Cxcr5	9	44511787	44561877	-	3332	protein_coding	chemokine (C-X-C motif) receptor 5 [Source:MGI Symbol;Acc:MGI:103567]	-	11	5	32	0	21	565	0.199033	0.184815	0.391353	0	0.727341	6.84621
ENSMUSG00000074886	181.736	195.909	251.175	317.027	236.225	886.36	209.606	479.871	-1.19813	0.039068	0.292672	Grk6	13	55445072	55460927	+	4202	protein_coding	G protein-coupled receptor kinase 6 [Source:MGI Symbol;Acc:MGI:1347078]	-	242	120	498	161	157	1774	3.47213	3.51721	4.82944	6.36206	4.31189	17.0453
ENSMUSG00000020143	57.0741	156.727	151.31	261.892	93.2864	756.453	121.704	370.544	-1.61142	0.0403369	0.296562	Dock2	11	34226815	34783892	-	11425	protein_coding	dedicator of cyto-kinesis 2 [Source:MGI Symbol;Acc:MGI:2149010]	-	76	96	300	133	62	1514	0.401046	1.03488	1.07001	1.93296	0.626267	5.35028
ENSMUSG00000033220	199.759	651.396	242.601	797.491	314.465	1894.13	364.585	1002.03	-1.46261	0.0421392	0.301628	Rac2	15	78559167	78572783	-	3103	protein_coding	Rac family small GTPase 2 [Source:MGI Symbol;Acc:MGI:97846]	-	266	399	481	405	209	3791	5.16817	15.8367	6.31664	21.6721	7.77299	49.3263
ENSMUSG00000019122	63.8329	93.0566	93.8123	318.996	180.554	87.4368	83.5673	195.663	-1.22074	0.043543	0.306668	Ccl9	11	83572919	83578636	-	3045	protein_coding	chemokine (C-C motif) ligand 9 [Source:MGI Symbol;Acc:MGI:104533]	-	85	57	186	162	120	175	1.68294	2.30548	2.48914	8.83396	4.54797	2.32037
T helper marker
gene_id	old_Sa_1	old_Sa_2	old_Sa_3	WT_Sa_1	WT_Sa_2	WT_Sa_3	old_Sa	WT_Sa	log2FoldChange	pvalue	padj	gene_name	gene_chr	gene_start	gene_end	gene_strand	gene_length	gene_biotype	gene_description	tf_family	old_Sa_1_count	old_Sa_2_count	old_Sa_3_count	WT_Sa_1_count	WT_Sa_2_count	WT_Sa_3_count	old_Sa_1_fpkm	old_Sa_2_fpkm	old_Sa_3_fpkm	WT_Sa_1_fpkm	WT_Sa_2_fpkm	WT_Sa_3_fpkm
ENSMUSG00000028150	220.036	334.677	332.378	25.5985	42.1293	139.399	295.697	69.0424	2.07261	0.00278672	0.0952891	Rorc	3	94372794	94398276	+	3559	protein_coding	RAR-related orphan receptor gamma [Source:MGI Symbol;Acc:MGI:104856]	THR-like	293	205	659	13	28	279	4.96337	7.09413	7.54537	0.606517	0.907933	3.16507
ENSMUSG00000000409	45.8095	208.969	82.7162	277.645	97.8003	1449.95	112.498	608.466	-2.44285	0.00916864	0.159431	Lck	4	129548344	129573641	-	2929	protein_coding	lymphocyte protein tyrosine kinase [Source:MGI Symbol;Acc:MGI:96756]	-	61	128	164	141	65	2902	1.25559	5.38225	2.28164	7.99332	2.56105	40.0023
ENSMUSG00000005763	30.039	39.1817	32.2795	61.0425	39.1201	271.304	33.8334	123.822	-1.88668	0.0257145	0.248821	Cd247	1	165788681	165877277	+	5329	protein_coding	CD247 antigen [Source:MGI Symbol;Acc:MGI:88334]	-	40	24	64	31	26	543	0.452534	0.554675	0.489393	0.965925	0.563056	4.11397
ENSMUSG00000024669	9.0117	0	18.1572	159.498	0	207.85	9.05631	122.449	-3.73077	0.0271157	0.254894	Cd5	19	10718143	10738974	-	2069	protein_coding	CD5 antigen [Source:MGI Symbol;Acc:MGI:88340]	-	12	0	36	81	0	416	0.349669	0	0.709031	6.50058	0	8.11782
ENSMUSG00000030336	15.0195	89.7915	18.6616	139.807	51.1571	308.777	41.1575	166.58	-2.04313	0.0287366	0.261113	Cd27	6	125232622	125237010	-	2328	protein_coding	CD27 antigen [Source:MGI Symbol;Acc:MGI:88326]	-	20	55	37	71	34	618	0.517945	2.90973	0.647652	5.06411	1.68546	10.718
ENSMUSG00000052013	42.0546	57.14	68.0896	102.394	21.0647	608.56	55.7614	244.006	-2.13395	0.0348314	0.278037	Btla	16	45224315	45257670	+	3396	protein_coding	B and T lymphocyte associated [Source:MGI Symbol;Acc:MGI:2658978]	-	56	35	135	52	14	1218	0.994162	1.26933	1.6199	2.54251	0.475756	14.4806
ENSMUSG00000030745	21.0273	50.6097	46.9061	53.1661	13.5416	510.631	39.5144	192.446	-2.29211	0.041857	0.30023	Il21r	7	125603429	125633570	+	3324	protein_coding	interleukin 21 receptor [Source:MGI Symbol;Acc:MGI:1890475]	-	28	31	93	27	9	1022	0.507848	1.14861	1.14011	1.34875	0.312468	12.4136
TCR signaling
gene_id	old_Sa_1	old_Sa_2	old_Sa_3	WT_Sa_1	WT_Sa_2	WT_Sa_3	old_Sa	WT_Sa	log2FoldChange	pvalue	padj	gene_name	gene_chr	gene_start	gene_end	gene_strand	gene_length	gene_biotype	gene_description	tf_family	old_Sa_1_count	old_Sa_2_count	old_Sa_3_count	WT_Sa_1_count	WT_Sa_2_count	WT_Sa_3_count	old_Sa_1_fpkm	old_Sa_2_fpkm	old_Sa_3_fpkm	WT_Sa_1_fpkm	WT_Sa_2_fpkm	WT_Sa_3_fpkm
ENSMUSG00000032093	26.2841	21.2234	29.7577	112.239	75.231	309.277	25.7551	165.582	-2.68387	0.000135325	0.0192465	Cd3e	9	44998740	45009627	-	4080	protein_coding	CD3 antigen, epsilon polypeptide [Source:MGI Symbol;Acc:MGI:88332]	-	35	13	59	57	50	619	0.517183	0.392425	0.589271	2.31976	1.41427	6.12544
ENSMUSG00000053044	1.50195	27.7537	7.56551	63.0116	22.5693	589.574	12.2737	225.052	-4.24124	0.000739702	0.0492227	Cd8b1	6	71322788	71337494	+	1483	protein_coding	CD8 antigen, beta chain 1 [Source:MGI Symbol;Acc:MGI:88347]	-	2	17	15	32	15	1180	0.0813065	1.41182	0.412167	3.58291	1.16728	32.1253
ENSMUSG00000020395	10.5137	53.8749	46.9061	192.973	46.6432	459.168	37.0982	232.928	-2.66101	0.00364469	0.104244	Itk	11	46325150	46389515	-	5354	protein_coding	IL2 inducible T cell kinase [Source:MGI Symbol;Acc:MGI:96621]	-	14	33	93	98	31	919	0.157647	0.759117	0.707828	3.03931	0.668201	6.93017
ENSMUSG00000004266	185.491	352.636	198.216	710.85	227.198	1804.7	245.448	914.248	-1.90109	0.00719053	0.141444	Ptpn6	6	124720707	124738714	-	2802	protein_coding	protein tyrosine phosphatase, non-receptor type 6 [Source:MGI Symbol;Acc:MGI:96055]	-	247	216	393	361	151	3612	5.31454	9.49421	5.71541	21.3928	6.21917	52.0459
ENSMUSG00000000409	45.8095	208.969	82.7162	277.645	97.8003	1449.95	112.498	608.466	-2.44285	0.00916864	0.159431	Lck	4	129548344	129573641	-	2929	protein_coding	lymphocyte protein tyrosine kinase [Source:MGI Symbol;Acc:MGI:96756]	-	61	128	164	141	65	2902	1.25559	5.38225	2.28164	7.99332	2.56105	40.0023
ENSMUSG00000021250	289.876	1661.96	394.919	118.147	281.364	254.816	782.252	218.109	1.8385	0.0105883	0.171953	Fos	12	85473890	85477273	+	2352	protein_coding	FBJ osteosarcoma oncogene [Source:MGI Symbol;Acc:MGI:95574]	TF_bZIP	386	1018	783	60	187	510	9.89434	53.3069	13.5659	4.23586	9.17546	8.75466
ENSMUSG00000074923	160.709	146.932	141.727	92.5483	52.6617	41.9697	149.789	62.3932	1.28613	0.011441	0.178286	Pak6	2	118663303	118698020	+	5211	protein_coding	p21 (RAC1) activated kinase 6 [Source:MGI Symbol;Acc:MGI:2679420]	-	214	90	281	47	35	84	2.47588	2.12713	2.1974	1.49763	0.775123	0.650826
ENSMUSG00000039936	87.1131	213.867	192.164	362.317	200.114	1053.74	164.381	538.723	-1.71731	0.0126142	0.185996	Pik3cd	4	149649168	149702571	-	6259	protein_coding	phosphatidylinositol-4,5-bisphosphate 3-kinase catalytic subunit delta [Source:MGI Symbol;Acc:MGI:1098211]	-	116	131	381	184	133	2109	1.11735	2.57774	2.48052	4.88136	2.45228	13.6044
ENSMUSG00000022610	756.983	342.84	915.426	198.88	234.721	420.696	671.75	284.766	1.23474	0.0175887	0.217529	Mapk12	15	89130584	89140703	-	3805	protein_coding	mitogen-activated protein kinase 12 [Source:MGI Symbol;Acc:MGI:1353438]	-	1008	210	1815	101	156	842	15.9714	6.79732	19.4377	4.40752	4.73144	8.93437
ENSMUSG00000033016	178.732	231.825	185.103	462.742	246.758	424.193	198.553	377.898	-0.932064	0.0206712	0.231199	Nfatc1	18	80606205	80713071	-	7433	protein_coding	nuclear factor of activated T cells, cytoplasmic, calcineurin dependent 1 [Source:MGI Symbol;Acc:MGI:102469]	RHD	238	142	367	235	164	849	1.93041	2.35287	2.01199	5.24966	2.54626	4.61158
ENSMUSG00000005763	30.039	39.1817	32.2795	61.0425	39.1201	271.304	33.8334	123.822	-1.88668	0.0257145	0.248821	Cd247	1	165788681	165877277	+	5329	protein_coding	CD247 antigen [Source:MGI Symbol;Acc:MGI:88334]	-	40	24	64	31	26	543	0.452534	0.554675	0.489393	0.965925	0.563056	4.11397
ENSMUSG00000032094	42.8056	115.913	68.0896	100.425	64.6986	681.008	75.6026	282.044	-1.90957	0.0358027	0.281721	Cd3d	9	44981786	44987339	+	1815	protein_coding	CD3 antigen, delta polypeptide [Source:MGI Symbol;Acc:MGI:88331]	-	57	71	135	51	43	1363	1.89337	4.81787	3.03096	4.66575	2.73411	30.3198
ENSMUSG00000036526	38.2997	93.0566	47.4105	153.591	51.1571	333.759	59.589	179.502	-1.60663	0.0388653	0.291842	Card11	5	140872990	141000582	-	4866	protein_coding	caspase recruitment domain family, member 11 [Source:MGI Symbol;Acc:MGI:1916978]	-	51	57	94	78	34	668	0.63188	1.4427	0.787189	2.66165	0.806363	5.54257
ENSMUSG00000046709	3.0039	16.3257	4.03494	106.332	7.5231	18.9863	7.78819	44.2805	-2.55118	0.046014	0.314313	Mapk10	5	102907948	103211334	-	11130	protein_coding	mitogen-activated protein kinase 10 [Source:MGI Symbol;Acc:MGI:1346863]	-	4	10	8	54	5	38	0.0216671	0.110657	0.0292899	0.805613	0.051844	0.137846

## Sheet: Terc_mock vs Old_WT_mock
Supplemental Table 3d. DEG of Tercko/ko mock mice vs. Old WT mock mice. All genes belonging to the respective pathways with a p value <0.05 are listed.
NLRP3 inflammasome signaling
gene_id	TERC_mock_1	TERC_mock_2	TERC_mock_3	old_mock_1	old_mock_2	old_mock_3	TERC_mock	old_mock	log2FoldChange	pvalue	padj	gene_name	gene_chr	gene_start	gene_end	gene_strand	gene_length	gene_biotype	gene_description	tf_family	TERC_mock_1_count	TERC_mock_2_count	TERC_mock_3_count	old_mock_1_count	old_mock_2_count	old_mock_3_count	TERC_mock_1_fpkm	TERC_mock_2_fpkm	TERC_mock_3_fpkm	old_mock_1_fpkm	old_mock_2_fpkm	old_mock_3_fpkm
ENSMUSG00000025199	497.662	337.324	351.854	843.568	1199.11	1020.12	395.613	1020.93	-1.36265	1.03194e-05	0.000469679	Chuk	19	44073335	44107480	-	5087	protein_coding	conserved helix-loop-helix ubiquitous kinase [Source:MGI Symbol;Acc:MGI:99484]	-	922	229	181	851	1261	1665	6.58321	4.35071	4.59555	11.6025	16.4276	14.0389
ENSMUSG00000019905	34.0051	67.7594	46.6546	0	0	1.22537	49.473	0.408456	6.65149	2.25552e-05	0.000890608	Gprc6a	10	51614823	51631461	-	2859	protein_coding	G protein-coupled receptor, family C, group 6, member A [Source:MGI Symbol;Acc:MGI:2429498]	-	63	46	24	0	0	2	0.800378	1.555	1.08422	0	0	0.0300052
ENSMUSG00000052684	1297.59	929.482	1316.05	506.537	545.83	625.55	1181.04	559.306	1.07796	9.50344e-05	0.00291075	Jun	4	95049034	95052222	-	3189	protein_coding	jun proto-oncogene [Source:MGI Symbol;Acc:MGI:96646]	TF_bZIP	2404	631	677	511	574	1021	27.381	19.1232	27.4192	11.1135	11.9283	13.7326
ENSMUSG00000033420	1091.94	565.644	925.317	326.127	287.179	397.631	860.967	336.979	1.35367	0.000122916	0.00363405	Antxr1	6	87133853	87335821	-	9537	protein_coding	anthrax toxin receptor 1 [Source:MGI Symbol;Acc:MGI:1916788]	-	2023	384	476	329	302	649	7.70465	3.8914	6.44638	2.39259	2.09853	2.91886
ENSMUSG00000024960	1184.24	1260.91	983.635	1703.99	2316.45	2475.85	1142.93	2165.43	-0.92133	0.000382411	0.00882605	Plcb3	19	6953714	6969759	-	4201	protein_coding	phospholipase C, beta 3 [Source:MGI Symbol;Acc:MGI:104778]	-	2194	856	506	1719	2436	4041	18.9694	19.6928	15.5567	28.3796	38.4278	41.2588
ENSMUSG00000042349	127.384	91.3279	83.5895	246.825	261.504	235.883	100.767	248.071	-1.28753	0.00215979	0.0342484	Ikbke	1	131254343	131279606	-	9018	protein_coding	inhibitor of kappaB kinase epsilon [Source:MGI Symbol;Acc:MGI:1929612]	-	236	62	43	249	275	385	0.95054	0.664458	0.615856	1.91502	2.02089	1.83118
ENSMUSG00000009647	221.843	198.859	194.394	396.507	524.909	346.166	205.032	422.527	-1.03976	0.00291914	0.0432798	Mcu	10	59446984	59616692	-	6936	protein_coding	mitochondrial calcium uniporter [Source:MGI Symbol;Acc:MGI:3026965]	-	411	135	100	400	552	565	2.15229	1.8811	1.86214	3.99976	5.27413	3.49398
ENSMUSG00000025860	1107.05	2163.88	2233.59	844.559	1079.3	1137.14	1834.84	1020.33	0.844799	0.0113835	0.109472	Xiap	X	42059679	42109656	+	9469	protein_coding	X-linked inhibitor of apoptosis [Source:MGI Symbol;Acc:MGI:107572]	-	2051	1469	1149	852	1135	1856	7.86738	14.9935	15.6724	6.24049	7.94351	8.40726
ENSMUSG00000043909	193.235	150.249	165.235	378.664	314.756	276.933	169.573	323.451	-0.926612	0.0115905	0.111045	Trp53bp1	2	121193281	121271407	-	14164	protein_coding	transformation related protein 53 binding protein 1 [Source:MGI Symbol;Acc:MGI:1351320]	-	358	102	85	382	331	452	0.918049	0.695986	0.775093	1.87051	1.54868	1.36878
ENSMUSG00000026029	555.956	615.727	487.93	232.948	276.719	404.984	553.204	304.883	0.857977	0.0139449	0.126873	Casp8	1	58795374	58847503	+	2893	protein_coding	caspase 8 [Source:MGI Symbol;Acc:MGI:1261423]	-	1030	418	251	235	291	661	12.9318	13.9641	11.2059	5.63382	6.666	9.80017
ENSMUSG00000078945	18.8917	17.6764	0	138.777	49.448	41.0498	12.1894	76.425	-2.6089	0.021418	0.169066	Naip2	13	100144063	100202092	-	4846	protein_coding	NLR family, apoptosis inhibitory protein 2 [Source:MGI Symbol;Acc:MGI:1298226]	-	35	12	0	140	52	67	0.262333	0.239323	0	2.00368	0.711116	0.593024
ENSMUSG00000046709	1.61929	38.2988	27.2152	0	0	3.06342	22.3778	1.02114	4.35345	0.0345502	0.225465	Mapk10	5	102907948	103211334	-	11130	protein_coding	mitogen-activated protein kinase 10 [Source:MGI Symbol;Acc:MGI:1346863]	-	3	26	14	0	0	5	0.00979027	0.225769	0.162463	0	0	0.0192688
ENSMUSG00000069830	1.07953	0	42.7667	0	0	0	14.6154	0	6.56705	0.0416434	0.248872	Nlrp1a	11	71092236	71144704	-	4166	protein_coding	NLR family, pyrin domain containing 1A [Source:MGI Symbol;Acc:MGI:2684861]	-	2	0	22	0	0	0	0.0174373	0	0.682063	0	0	0
ENSMUSG00000020366	569.45	833.735	824.232	465.895	570.554	399.47	742.472	478.64	0.63171	0.0449042	0.258729	Mapk9	11	49846751	49886421	+	6784	protein_coding	mitogen-activated protein kinase 9 [Source:MGI Symbol;Acc:MGI:1346862]	-	1055	566	424	470	600	652	5.64853	8.06337	8.07237	4.80502	5.86119	4.12233
Macrophage marker
gene_id	TERC_mock_1	TERC_mock_2	TERC_mock_3	old_mock_1	old_mock_2	old_mock_3	TERC_mock	old_mock	log2FoldChange	pvalue	padj	gene_name	gene_chr	gene_start	gene_end	gene_strand	gene_length	gene_biotype	gene_description	tf_family	TERC_mock_1_count	TERC_mock_2_count	TERC_mock_3_count	old_mock_1_count	old_mock_2_count	old_mock_3_count	TERC_mock_1_fpkm	TERC_mock_2_fpkm	TERC_mock_3_fpkm	old_mock_1_fpkm	old_mock_2_fpkm	old_mock_3_fpkm
ENSMUSG00000079018	2768.99	2546.87	2083.91	1509.7	1163.93	970.49	2466.59	1214.71	1.0232	0.000143243	0.00406051	Ly6c1	15	75044018	75048830	-	1677	protein_coding	lymphocyte antigen 6 complex, locus C1 [Source:MGI Symbol;Acc:MGI:96882]	-	5130	1729	1072	1523	1224	1584	111.11	99.6433	82.5624	62.9869	48.3692	40.5138
ENSMUSG00000016498	2.69882	20.6224	36.9349	0	0	0	20.0854	0	7.02486	0.00260334	0.0396305	Pdcd1lg2	19	29410919	29471157	+	1645	protein_coding	programmed cell death 1 ligand 2 [Source:MGI Symbol;Acc:MGI:1930125]	-	5	14	19	0	0	0	0.110401	0.822523	1.49179	0	0	0
ENSMUSG00000002944	3923	3015.29	2293.85	2045.97	1674.58	1826.41	3077.38	1848.99	0.736119	0.00665107	0.0774025	Cd36	5	17781690	17888801	-	3590	protein_coding	CD36 molecule [Source:MGI Symbol;Acc:MGI:107899]	-	7268	2047	1180	2064	1761	2981	73.5342	55.1073	42.453	39.8748	32.5076	35.6162
ENSMUSG00000000489	1574.49	534.71	643.445	465.895	400.339	430.716	917.548	432.317	1.08879	0.0130141	0.120613	Pdgfb	15	79995874	80014977	-	4161	protein_coding	platelet derived growth factor, B polypeptide [Source:MGI Symbol;Acc:MGI:97528]	-	2917	363	331	470	421	703	25.4629	8.43131	10.2743	7.834	6.7051	7.24667
ENSMUSG00000051439	308.205	243.05	445.163	557.092	1017.49	461.963	332.139	678.848	-1.03326	0.0143057	0.12891	Cd14	18	36725074	36726736	-	1572	protein_coding	CD14 antigen [Source:MGI Symbol;Acc:MGI:88318]	-	571	165	229	562	1070	754	13.1933	10.1442	18.815	24.7952	45.1078	20.5731
ENSMUSG00000020826	21.5905	94.2739	85.5335	21.8079	14.2638	6.73952	67.1326	14.2704	2.23542	0.0182393	0.152523	Nos2	11	78920787	78960254	+	4412	protein_coding	nitric oxide synthase 2, inducible [Source:MGI Symbol;Acc:MGI:97361]	-	40	64	44	22	15	11	0.329301	1.40194	1.28807	0.345836	0.225308	0.106939
ENSMUSG00000000440	34.0051	32.4067	23.3273	16.8515	156.902	162.974	29.913	112.243	-1.90292	0.0319551	0.216017	Pparg	6	115360951	115490399	+	2953	protein_coding	peroxisome proliferator activated receptor gamma [Source:MGI Symbol;Acc:MGI:97747]	THR-like	63	22	12	17	165	266	0.7749	0.720021	0.524854	0.399272	3.70289	3.86366
ENSMUSG00000026390	165.707	17.6764	161.347	34.6943	25.6749	36.1483	114.91	32.1725	1.83734	0.0336048	0.223039	Marco	1	120474538	120505024	-	1925	protein_coding	macrophage receptor with collagenous structure [Source:MGI Symbol;Acc:MGI:1309998]	-	307	12	83	35	27	59	5.79264	0.602472	5.56888	1.26102	0.929509	1.31463
ENSMUSG00000014599	305.506	109.004	34.991	809.865	283.375	187.481	149.834	426.907	-1.49974	0.0474152	0.266536	Csf1	3	107741048	107760469	-	5281	protein_coding	colony stimulating factor 1 (macrophage) [Source:MGI Symbol;Acc:MGI:1339753]	-	566	74	18	817	298	306	3.89286	1.35426	0.440228	10.7297	3.73956	2.48534
Chemokine signaling
gene_id	TERC_mock_1	TERC_mock_2	TERC_mock_3	old_mock_1	old_mock_2	old_mock_3	TERC_mock	old_mock	log2FoldChange	pvalue	padj	gene_name	gene_chr	gene_start	gene_end	gene_strand	gene_length	gene_biotype	gene_description	tf_family	TERC_mock_1_count	TERC_mock_2_count	TERC_mock_3_count	old_mock_1_count	old_mock_2_count	old_mock_3_count	TERC_mock_1_fpkm	TERC_mock_2_fpkm	TERC_mock_3_fpkm	old_mock_1_fpkm	old_mock_2_fpkm	old_mock_3_fpkm
ENSMUSG00000041112	540.843	595.104	400.452	90.2053	144.54	185.03	512.133	139.925	1.8696	4.63088e-06	0.000239452	Elmo1	13	20090596	20608353	+	12580	protein_coding	engulfment and cell motility 1 [Source:MGI Symbol;Acc:MGI:2153044]	-	1002	404	206	91	152	302	2.89305	3.10375	2.11499	0.5017	0.800725	1.02969
ENSMUSG00000025199	497.662	337.324	351.854	843.568	1199.11	1020.12	395.613	1020.93	-1.36265	1.03194e-05	0.000469679	Chuk	19	44073335	44107480	-	5087	protein_coding	conserved helix-loop-helix ubiquitous kinase [Source:MGI Symbol;Acc:MGI:99484]	-	922	229	181	851	1261	1665	6.58321	4.35071	4.59555	11.6025	16.4276	14.0389
ENSMUSG00000018909	2322.06	2271.41	2571.84	1231.15	1394.05	1248.65	2388.44	1291.28	0.886974	2.2906e-05	0.000902467	Arrb1	7	99535466	99606771	+	11175	protein_coding	arrestin, beta 1 [Source:MGI Symbol;Acc:MGI:99473]	-	4302	1542	1323	1242	1466	2038	13.9827	13.3359	15.2909	7.70828	8.69375	7.82235
ENSMUSG00000002489	104.174	166.452	178.843	482.747	525.86	362.096	149.823	456.901	-1.61872	3.74533e-05	0.00134524	Tiam1	16	89787111	90143769	-	10048	protein_coding	T cell lymphoma invasion and metastasis 1 [Source:MGI Symbol;Acc:MGI:103306]	-	193	113	92	487	553	591	0.697664	1.08689	1.18258	3.3615	3.64726	2.52283
ENSMUSG00000038811	392.408	773.341	699.819	28.7467	174.97	151.333	621.856	118.35	2.39041	7.56478e-05	0.00241197	Gngt2	11	95837216	95845734	+	1877	protein_coding	guanine nucleotide binding protein (G protein), gamma transducing activity polypeptide 2 [Source:MGI Symbol;Acc:MGI:893584]	-	727	525	360	29	184	247	14.0682	27.0322	24.7719	1.07156	6.49642	5.64434
ENSMUSG00000029053	299.569	235.685	225.497	497.616	953.776	573.472	253.584	674.954	-1.40794	0.000171305	0.00462161	Prkcz	4	155260129	155361361	-	6318	protein_coding	protein kinase C, zeta [Source:MGI Symbol;Acc:MGI:97602]	-	555	160	116	502	1003	936	3.19067	2.44752	2.37137	5.51071	10.5206	6.35443
ENSMUSG00000022376	225.081	82.4897	126.356	38.6594	10.4602	12.2537	144.642	20.4577	2.83562	0.000240453	0.00605616	Adcy8	15	64697084	64922296	-	8152	protein_coding	adenylate cyclase 8 [Source:MGI Symbol;Acc:MGI:1341110]	-	417	56	65	39	11	20	1.85798	0.663911	1.02984	0.331806	0.089423	0.105232
ENSMUSG00000024960	1184.24	1260.91	983.635	1703.99	2316.45	2475.85	1142.93	2165.43	-0.92133	0.000382411	0.00882605	Plcb3	19	6953714	6969759	-	4201	protein_coding	phospholipase C, beta 3 [Source:MGI Symbol;Acc:MGI:104778]	-	2194	856	506	1719	2436	4041	18.9694	19.6928	15.5567	28.3796	38.4278	41.2588
ENSMUSG00000022607	859.303	966.308	1170.25	419.306	426.964	599.204	998.621	481.825	1.04845	0.000421228	0.0095253	Ptk2	15	73205102	73423280	-	11803	protein_coding	PTK2 protein tyrosine kinase 2 [Source:MGI Symbol;Acc:MGI:95481]	-	1592	656	602	423	449	978	4.89913	5.37152	6.58757	2.4856	2.52101	3.55408
ENSMUSG00000003228	665.528	892.656	1671.79	281.52	378.467	548.964	1076.66	402.984	1.41444	0.000925724	0.017809	Grk5	19	60889749	61092553	+	3165	protein_coding	G protein-coupled receptor kinase 5 [Source:MGI Symbol;Acc:MGI:109161]	-	1233	606	860	284	398	896	14.1501	18.5048	35.095	6.2234	8.33355	12.1427
ENSMUSG00000068798	1808.21	2418.72	2509.63	1096.34	1393.1	1452.06	2245.52	1313.83	0.771862	0.00261423	0.0397288	Rap1a	3	105727267	105801336	-	2607	protein_coding	RAS-related protein 1a [Source:MGI Symbol;Acc:MGI:97852]	-	3350	1642	1291	1106	1465	2370	46.6737	60.8721	63.9596	29.4237	37.2406	38.9931
ENSMUSG00000045382	354.624	141.411	371.293	51.5459	73.2211	138.466	289.109	87.7445	1.71609	0.00325654	0.0467643	Cxcr4	1	128588199	128592293	-	1808	protein_coding	chemokine (C-X-C motif) receptor 4 [Source:MGI Symbol;Acc:MGI:109563]	-	657	96	191	52	77	226	13.1988	5.13167	13.6444	1.99475	2.82236	5.36155
ENSMUSG00000017776	1392.05	1752.91	2122.79	918.904	1054.57	1112.63	1755.91	1028.7	0.769488	0.00346222	0.0487628	Crk	11	75679259	75706908	+	4730	protein_coding	v-crk avian sarcoma virus CT10 oncogene homolog [Source:MGI Symbol;Acc:MGI:88508]	-	2579	1190	1092	927	1109	1816	19.8043	24.3149	29.8183	13.5926	15.5379	16.4678
ENSMUSG00000020919	550.559	489.046	900.046	309.275	338.529	319.821	646.55	322.541	1.00056	0.00420636	0.0560232	Stat5b	11	100780731	100850724	-	5539	protein_coding	signal transducer and activator of transcription 5B [Source:MGI Symbol;Acc:MGI:103035]	STAT	1020	332	463	312	356	522	6.68863	5.79286	10.7962	3.90667	4.25931	4.04222
ENSMUSG00000042228	663.909	1094.46	1160.53	515.459	597.18	390.892	972.968	501.177	0.955625	0.00489447	0.0628932	Lyn	4	3678115	3813122	+	4073	protein_coding	LYN proto-oncogene, Src family tyrosine kinase [Source:MGI Symbol;Acc:MGI:96892]	-	1230	743	597	520	628	638	10.9688	17.6303	18.9313	8.85467	10.218	6.71873
ENSMUSG00000042262	4.31811	17.6764	27.2152	0	0	0	16.4032	0	6.73333	0.00509839	0.0646314	Ccr8	9	120092114	120094906	+	1175	protein_coding	chemokine (C-C motif) receptor 8 [Source:MGI Symbol;Acc:MGI:1201402]	-	8	12	14	0	0	0	0.247298	0.987028	1.5389	0	0	0
ENSMUSG00000048480	9.17598	19.1494	17.4955	0	0	0	15.2736	0	6.63516	0.00541743	0.0672928	Cxcr1	1	74191785	74194631	-	1491	protein_coding	chemokine (C-X-C motif) receptor 1 [Source:MGI Symbol;Acc:MGI:2448715]	-	17	13	9	0	0	0	0.414133	0.842659	0.779625	0	0	0
ENSMUSG00000005034	529.508	655.498	940.868	346.943	389.878	390.279	708.625	375.7	0.911787	0.0058023	0.0700825	Prkacb	3	146729574	146812990	-	8772	protein_coding	protein kinase, cAMP dependent, catalytic, beta [Source:MGI Symbol;Acc:MGI:97594]	-	981	445	484	350	410	637	4.06199	4.90284	7.12636	2.76728	3.09746	3.11474
ENSMUSG00000019699	434.509	1252.08	1512.39	269.625	562.946	446.646	1066.32	426.406	1.32011	0.00616269	0.0732439	Akt3	1	177020073	177258203	-	5124	protein_coding	thymoma viral proto-oncogene 3 [Source:MGI Symbol;Acc:MGI:1345147]	-	805	850	778	272	592	729	5.70631	16.0323	19.6106	3.68165	7.65655	6.10238
ENSMUSG00000029375	16528.6	8547.99	8841.05	5848.47	4314.34	7749.83	11305.9	5970.88	0.921235	0.00642533	0.0753145	Cxcl15	5	90794534	90803067	+	2127	protein_coding	chemokine (C-X-C motif) ligand 15 [Source:MGI Symbol;Acc:MGI:1339941]	-	30622	5803	4548	5900	4537	12649	522.919	263.676	276.168	192.383	141.358	255.076
ENSMUSG00000043004	157.071	518.507	369.349	74.345	168.313	123.762	348.309	122.14	1.50807	0.00675455	0.0779978	Gng2	14	19872559	19977627	-	4390	protein_coding	guanine nucleotide binding protein (G protein), gamma 2 [Source:MGI Symbol;Acc:MGI:102705]	-	291	352	190	75	177	202	2.40767	7.74933	5.58998	1.1849	2.67196	1.97364
ENSMUSG00000032946	1051.46	684.959	417.948	348.926	320.461	373.737	718.122	347.708	1.04981	0.00779295	0.085591	Rasgrp2	19	6399340	6415216	+	12384	protein_coding	RAS, guanyl releasing protein 2 [Source:MGI Symbol;Acc:MGI:1333849]	-	1948	465	215	352	337	610	5.71343	3.62893	2.24232	1.97136	1.80339	2.11276
ENSMUSG00000029064	3814.51	6064.47	6242	3305.87	3662.96	2985.61	5373.66	3318.15	0.695007	0.00857295	0.0906826	Gnb1	4	155491361	155559269	+	4268	protein_coding	guanine nucleotide binding protein (G protein), beta 1 [Source:MGI Symbol;Acc:MGI:95781]	-	7067	4117	3211	3335	3852	4873	60.1422	93.2272	97.171	54.1944	59.8112	48.9725
ENSMUSG00000018012	218.064	42.7179	270.208	544.205	523.008	458.287	176.997	508.5	-1.52265	0.0092488	0.0956815	Rac3	11	120721470	120723969	+	1293	protein_coding	Rac family small GTPase 3 [Source:MGI Symbol;Acc:MGI:2180784]	-	404	29	139	549	550	748	11.3488	2.16763	13.8847	29.4481	28.1893	24.8133
ENSMUSG00000048521	28.0677	30.9336	15.5515	60.4673	69.4174	151.945	24.851	93.9434	-1.90842	0.0108302	0.106322	Cxcr6	9	123806475	123811760	+	1931	protein_coding	chemokine (C-X-C motif) receptor 6 [Source:MGI Symbol;Acc:MGI:1934582]	-	52	21	8	61	73	248	0.978115	1.05105	0.535092	2.19094	2.50531	5.50871
ENSMUSG00000039621	401.584	350.581	571.519	182.393	190.185	291.025	441.228	221.201	0.991715	0.0111764	0.108306	Prex1	2	166566342	166713832	-	10266	protein_coding	phosphatidylinositol-3,4,5-trisphosphate-dependent Rac exchange factor 1 [Source:MGI Symbol;Acc:MGI:3040696]	-	744	238	294	184	200	475	2.63233	2.24059	3.69885	1.24308	1.29107	1.9846
ENSMUSG00000003283	326.557	309.336	188.562	70.3799	135.982	148.269	274.819	118.21	1.21802	0.0123424	0.116377	Hck	2	153108468	153151441	+	2092	protein_coding	hemopoietic cell kinase [Source:MGI Symbol;Acc:MGI:96052]	-	605	210	97	71	143	242	10.5042	9.70161	5.98868	2.35386	4.52997	4.96174
ENSMUSG00000032192	188.917	207.697	128.3	239.887	453.59	399.47	174.972	364.315	-1.05449	0.0133599	0.122926	Gnb5	9	75306288	75345876	+	3115	protein_coding	guanine nucleotide binding protein (G protein), beta 5 [Source:MGI Symbol;Acc:MGI:101848]	-	350	141	66	242	477	652	4.08111	4.37469	2.73657	5.38816	10.148	8.9778
ENSMUSG00000018927	1052.54	664.337	526.808	431.201	286.228	463.801	747.894	393.743	0.928117	0.0148605	0.132549	Ccl6	11	83587882	83593087	-	1795	protein_coding	chemokine (C-C motif) ligand 6 [Source:MGI Symbol;Acc:MGI:98263]	-	1950	451	271	435	301	757	39.4583	24.2828	19.4996	16.8077	11.1128	18.0889
ENSMUSG00000000982	25.9086	16.2033	25.2713	0	0	3.06342	22.4611	1.02114	4.34831	0.0180125	0.151262	Ccl3	11	83647844	83649355	-	766	protein_coding	chemokine (C-C motif) ligand 3 [Source:MGI Symbol;Acc:MGI:98260]	-	48	11	13	0	0	5	2.27605	1.38787	2.19197	0	0	0.279977
ENSMUSG00000061353	1695.4	1386.12	2033.36	1012.08	496.382	1270.71	1704.96	926.39	0.87915	0.0187195	0.155306	Cxcl12	6	117168535	117181367	+	8176	protein_coding	chemokine (C-X-C motif) ligand 12 [Source:MGI Symbol;Acc:MGI:103556]	-	3141	941	1046	1021	522	2074	13.9539	11.1233	16.5239	8.661	4.23107	10.8805
ENSMUSG00000026166	1.61929	0	0	26.7642	0	62.4937	0.539763	29.7526	-5.37698	0.019854	0.161148	Ccl20	1	83116766	83119167	+	1421	protein_coding	chemokine (C-C motif) ligand 20 [Source:MGI Symbol;Acc:MGI:1329031]	-	3	0	0	27	0	102	0.0766824	0	0	1.31781	0	3.07884
ENSMUSG00000032562	2213.57	2982.89	3990.91	2353.27	1809.61	1238.85	3062.46	1800.57	0.765833	0.020833	0.166021	Gnai2	9	107614125	107635367	-	3779	protein_coding	guanine nucleotide binding protein (G protein), alpha inhibiting 2 [Source:MGI Symbol;Acc:MGI:95772]	-	4101	2025	2053	2374	1903	2022	39.4168	51.7886	70.167	43.57	33.372	22.9501
ENSMUSG00000074715	22.6701	27.9876	13.6076	0	0	3.06342	21.4217	1.02114	4.28493	0.0223435	0.173237	Ccl28	13	119623819	119654359	+	4844	protein_coding	chemokine (C-C motif) ligand 28 [Source:MGI Symbol;Acc:MGI:1861731]	-	42	19	7	0	0	5	0.31493	0.379084	0.186644	0	0	0.0442738
ENSMUSG00000027852	998.022	1881.06	1675.68	652.254	1097.37	931.279	1518.25	893.632	0.763103	0.0255356	0.188664	Nras	3	103058285	103067914	+	5331	protein_coding	neuroblastoma ras oncogene [Source:MGI Symbol;Acc:MGI:97376]	-	1849	1277	862	658	1154	1520	12.5979	23.1509	20.8843	8.56053	14.3456	12.2297
ENSMUSG00000018930	22.6701	38.2988	0	0	0	1.22537	20.3229	0.408456	5.46803	0.026402	0.192945	Ccl4	11	83662584	83664683	+	660	protein_coding	chemokine (C-C motif) ligand 4 [Source:MGI Symbol;Acc:MGI:98261]	-	42	26	0	0	0	2	2.31139	3.80729	0	0	0	0.129977
ENSMUSG00000020676	52.357	91.3279	213.834	22.7991	2.85277	51.4654	119.173	25.7058	2.19873	0.0264813	0.193256	Ccl11	11	82057823	82062955	+	1082	protein_coding	chemokine (C-C motif) ligand 11 [Source:MGI Symbol;Acc:MGI:103576]	-	97	62	110	23	3	84	3.25622	5.53797	13.1307	1.47429	0.183745	3.32991
ENSMUSG00000001847	1530.77	2586.64	3217.23	1532.5	1694.54	1229.04	2444.88	1485.36	0.717905	0.0267032	0.194558	Rac1	5	143503634	143528036	-	4496	protein_coding	Rac family small GTPase 1 [Source:MGI Symbol;Acc:MGI:97845]	-	2836	1756	1655	1546	1782	2006	22.9112	37.7472	47.5437	23.8488	26.2665	19.1375
ENSMUSG00000022220	1402.3	178.237	186.619	136.795	65.6137	319.821	589.053	174.076	1.75979	0.0272535	0.197122	Adcy4	14	55769057	55784095	-	4672	protein_coding	adenylate cyclase 4 [Source:MGI Symbol;Acc:MGI:99674]	-	2598	121	96	138	69	522	20.1978	2.50305	2.65393	2.04861	0.978739	4.79235
ENSMUSG00000004936	451.782	441.909	594.846	235.921	325.216	332.074	496.179	297.737	0.733725	0.027868	0.198754	Map2k1	9	64185770	64253631	-	3391	protein_coding	mitogen-activated protein kinase kinase 1 [Source:MGI Symbol;Acc:MGI:1346866]	-	837	300	306	238	342	542	8.96533	8.55027	11.6551	4.8678	6.68373	6.8557
ENSMUSG00000024639	670.386	948.631	981.691	425.253	709.389	429.491	866.903	521.378	0.732295	0.0319366	0.215974	Gnaq	19	16132831	16387463	+	6185	protein_coding	guanine nucleotide binding protein, alpha q polypeptide [Source:MGI Symbol;Acc:MGI:95776]	-	1242	644	505	429	746	701	7.29374	10.0631	10.5456	4.81062	7.99318	4.86137
ENSMUSG00000031955	343.289	263.672	291.591	209.157	150.246	160.523	299.518	173.309	0.792613	0.0343636	0.225465	Bcar1	8	111710474	111743809	-	4547	protein_coding	breast cancer anti-estrogen resistance 1 [Source:MGI Symbol;Acc:MGI:108091]	-	636	179	150	211	158	262	5.08043	3.80465	4.26076	3.21841	2.30278	2.47148
ENSMUSG00000027669	397.806	505.249	340.19	282.511	263.406	199.735	414.415	248.55	0.739647	0.0371732	0.235369	Gnb4	3	32580332	32616585	-	12692	protein_coding	guanine nucleotide binding protein (G protein), beta 4 [Source:MGI Symbol;Acc:MGI:104581]	-	737	343	175	285	277	326	2.10914	2.61186	1.78086	1.55739	1.44634	1.10171
ENSMUSG00000041417	756.748	961.889	1384.09	609.629	776.904	569.795	1034.24	652.11	0.663277	0.0419131	0.24965	Pik3r1	13	101680563	101768217	-	10079	protein_coding	phosphoinositide-3-kinase regulatory subunit 1 [Source:MGI Symbol;Acc:MGI:97583]	-	1402	653	712	615	817	930	5.05242	6.26155	9.12396	4.23195	5.37187	3.95773
ENSMUSG00000036402	878.735	1417.05	1424.91	914.939	815.892	713.776	1240.23	814.869	0.604324	0.0428991	0.251998	Gng12	6	66896397	67021350	+	4727	protein_coding	guanine nucleotide binding protein (G protein), gamma 12 [Source:MGI Symbol;Acc:MGI:1336171]	-	1628	962	733	923	858	1165	12.5094	19.6687	20.0281	13.5425	12.0288	10.5711
ENSMUSG00000031834	322.239	181.183	322.695	560.066	468.805	375.575	275.372	468.149	-0.763504	0.0469725	0.265633	Pik3r2	8	70768176	70776713	-	4176	protein_coding	phosphoinositide-3-kinase regulatory subunit 2 [Source:MGI Symbol;Acc:MGI:1098772]	-	597	123	166	565	493	613	5.19257	2.84663	5.13415	9.38364	7.82361	6.29623
T helper marker
gene_id	TERC_mock_1	TERC_mock_2	TERC_mock_3	old_mock_1	old_mock_2	old_mock_3	TERC_mock	old_mock	log2FoldChange	pvalue	padj	gene_name	gene_chr	gene_start	gene_end	gene_strand	gene_length	gene_biotype	gene_description	tf_family	TERC_mock_1_count	TERC_mock_2_count	TERC_mock_3_count	old_mock_1_count	old_mock_2_count	old_mock_3_count	TERC_mock_1_fpkm	TERC_mock_2_fpkm	TERC_mock_3_fpkm	old_mock_1_fpkm	old_mock_2_fpkm	old_mock_3_fpkm
ENSMUSG00000032238	372.976	453.693	589.015	246.825	159.755	298.377	471.895	234.986	1.00137	0.0108919	0.106635	Rora	9	68653786	69388246	+	13071	protein_coding	RAR-related orphan receptor alpha [Source:MGI Symbol;Acc:MGI:104661]	THR-like	691	308	303	249	168	487	1.92016	2.27734	2.99402	1.32122	0.851768	1.59809
ENSMUSG00000019256	684.42	515.561	639.557	380.646	438.375	359.032	613.179	392.685	0.644637	0.0276679	0.198479	Ahr	12	35497974	35535038	-	6163	protein_coding	aryl-hydrocarbon receptor [Source:MGI Symbol;Acc:MGI:105043]	bHLH	1268	350	329	384	461	586	7.47301	5.48861	6.89485	4.32138	4.95712	4.07836
TCR signaling
gene_id	TERC_mock_1	TERC_mock_2	TERC_mock_3	old_mock_1	old_mock_2	old_mock_3	TERC_mock	old_mock	log2FoldChange	pvalue	padj	gene_name	gene_chr	gene_start	gene_end	gene_strand	gene_length	gene_biotype	gene_description	tf_family	TERC_mock_1_count	TERC_mock_2_count	TERC_mock_3_count	old_mock_1_count	old_mock_2_count	old_mock_3_count	TERC_mock_1_fpkm	TERC_mock_2_fpkm	TERC_mock_3_fpkm	old_mock_1_fpkm	old_mock_2_fpkm	old_mock_3_fpkm
ENSMUSG00000030742	118.208	72.1785	38.8789	578.9	614.296	352.293	76.4218	515.163	-2.72745	3.81797e-08	3.63256e-06	Lat	7	126363824	126369570	-	2767	protein_coding	linker for activation of T cells [Source:MGI Symbol;Acc:MGI:1342293]	-	219	49	20	584	646	575	2.87477	1.71148	0.933559	14.6382	15.4719	8.91332
ENSMUSG00000025199	497.662	337.324	351.854	843.568	1199.11	1020.12	395.613	1020.93	-1.36265	1.03194e-05	0.000469679	Chuk	19	44073335	44107480	-	5087	protein_coding	conserved helix-loop-helix ubiquitous kinase [Source:MGI Symbol;Acc:MGI:99484]	-	922	229	181	851	1261	1665	6.58321	4.35071	4.59555	11.6025	16.4276	14.0389
ENSMUSG00000052684	1297.59	929.482	1316.05	506.537	545.83	625.55	1181.04	559.306	1.07796	9.50344e-05	0.00291075	Jun	4	95049034	95052222	-	3189	protein_coding	jun proto-oncogene [Source:MGI Symbol;Acc:MGI:96646]	TF_bZIP	2404	631	677	511	574	1021	27.381	19.1232	27.4192	11.1135	11.9283	13.7326
ENSMUSG00000032475	574.848	926.536	688.156	332.074	356.596	420.913	729.847	369.861	0.978142	0.00219338	0.0346082	Nck1	9	100492293	100546134	-	4792	protein_coding	non-catalytic region of tyrosine kinase adaptor protein 1 [Source:MGI Symbol;Acc:MGI:109601]	-	1065	629	354	335	375	687	8.07238	12.6859	9.54129	4.84854	5.18603	6.14923
ENSMUSG00000019699	434.509	1252.08	1512.39	269.625	562.946	446.646	1066.32	426.406	1.32011	0.00616269	0.0732439	Akt3	1	177020073	177258203	-	5124	protein_coding	thymoma viral proto-oncogene 3 [Source:MGI Symbol;Acc:MGI:1345147]	-	805	850	778	272	592	729	5.70631	16.0323	19.6106	3.68165	7.65655	6.10238
ENSMUSG00000019843	516.014	640.768	723.147	403.446	258.651	353.518	626.643	338.538	0.885852	0.00729613	0.0820404	Fyn	10	39368855	39565381	+	4363	protein_coding	Fyn proto-oncogene [Source:MGI Symbol;Acc:MGI:95602]	-	956	435	372	407	272	577	7.95869	9.63585	11.0123	6.46982	4.13147	5.67246
ENSMUSG00000033016	308.205	365.311	301.311	83.2664	79.8775	230.982	324.942	131.375	1.30147	0.0136996	0.125471	Nfatc1	18	80606205	80713071	-	7433	protein_coding	nuclear factor of activated T cells, cytoplasmic, calcineurin dependent 1 [Source:MGI Symbol;Acc:MGI:102469]	RHD	571	248	155	84	84	377	2.79023	3.22458	2.69332	0.783788	0.748921	2.17549
ENSMUSG00000031284	3.77834	0	58.3183	0	0	0	20.6989	0	7.07049	0.0137478	0.125719	Pak3	X	143518591	143797796	+	9552	protein_coding	p21 (RAC1) activated kinase 3 [Source:MGI Symbol;Acc:MGI:1339656]	-	7	0	30	0	0	0	0.0266178	0	0.405647	0	0	0
ENSMUSG00000074923	41.5618	57.4482	0	107.057	282.424	110.283	33.0033	166.588	-2.32209	0.0232531	0.177886	Pak6	2	118663303	118698020	+	5211	protein_coding	p21 (RAC1) activated kinase 6 [Source:MGI Symbol;Acc:MGI:2679420]	-	77	39	0	108	297	180	0.536708	0.723319	0	1.43743	3.77708	1.4816
ENSMUSG00000027852	998.022	1881.06	1675.68	652.254	1097.37	931.279	1518.25	893.632	0.763103	0.0255356	0.188664	Nras	3	103058285	103067914	+	5331	protein_coding	neuroblastoma ras oncogene [Source:MGI Symbol;Acc:MGI:97376]	-	1849	1277	862	658	1154	1520	12.5979	23.1509	20.8843	8.56053	14.3456	12.2297
ENSMUSG00000004936	451.782	441.909	594.846	235.921	325.216	332.074	496.179	297.737	0.733725	0.027868	0.198754	Map2k1	9	64185770	64253631	-	3391	protein_coding	mitogen-activated protein kinase kinase 1 [Source:MGI Symbol;Acc:MGI:1346866]	-	837	300	306	238	342	542	8.96533	8.55027	11.6551	4.8678	6.68373	6.8557
ENSMUSG00000046709	1.61929	38.2988	27.2152	0	0	3.06342	22.3778	1.02114	4.35345	0.0345502	0.225465	Mapk10	5	102907948	103211334	-	11130	protein_coding	mitogen-activated protein kinase 10 [Source:MGI Symbol;Acc:MGI:1346863]	-	3	26	14	0	0	5	0.00979027	0.225769	0.162463	0	0	0.0192688
ENSMUSG00000041417	756.748	961.889	1384.09	609.629	776.904	569.795	1034.24	652.11	0.663277	0.0419131	0.24965	Pik3r1	13	101680563	101768217	-	10079	protein_coding	phosphoinositide-3-kinase regulatory subunit 1 [Source:MGI Symbol;Acc:MGI:97583]	-	1402	653	712	615	817	930	5.05242	6.26155	9.12396	4.23195	5.37187	3.95773
ENSMUSG00000020366	569.45	833.735	824.232	465.895	570.554	399.47	742.472	478.64	0.63171	0.0449042	0.258729	Mapk9	11	49846751	49886421	+	6784	protein_coding	mitogen-activated protein kinase 9 [Source:MGI Symbol;Acc:MGI:1346862]	-	1055	566	424	470	600	652	5.64853	8.06337	8.07237	4.80502	5.86119	4.12233
ENSMUSG00000031834	322.239	181.183	322.695	560.066	468.805	375.575	275.372	468.149	-0.763504	0.0469725	0.265633	Pik3r2	8	70768176	70776713	-	4176	protein_coding	phosphoinositide-3-kinase regulatory subunit 2 [Source:MGI Symbol;Acc:MGI:1098772]	-	597	123	166	565	493	613	5.19257	2.84663	5.13415	9.38364	7.82361	6.29623
Myeloid supressor cells
gene_id	TERC_mock_1	TERC_mock_2	TERC_mock_3	old_mock_1	old_mock_2	old_mock_3	TERC_mock	old_mock	log2FoldChange	pvalue	padj	gene_name	gene_chr	gene_start	gene_end	gene_strand	gene_length	gene_biotype	gene_description	tf_family	TERC_mock_1_count	TERC_mock_2_count	TERC_mock_3_count	old_mock_1_count	old_mock_2_count	old_mock_3_count	TERC_mock_1_fpkm	TERC_mock_2_fpkm	TERC_mock_3_fpkm	old_mock_1_fpkm	old_mock_2_fpkm	old_mock_3_fpkm
ENSMUSG00000079018	2768.99	2546.87	2083.91	1509.7	1163.93	970.49	2466.59	1214.71	1.0232	0.000143243	0.00406051	Ly6c1	15	75044018	75048830	-	1677	protein_coding	lymphocyte antigen 6 complex, locus C1 [Source:MGI Symbol;Acc:MGI:96882]	-	5130	1729	1072	1523	1224	1584	111.11	99.6433	82.5624	62.9869	48.3692	40.5138

## Sheet: TERC_mock vs Young_WT_mock
Supplemental Table 3e. DEG of Tercko/ko mock mice vs. Young WT mock mice. All genes belonging to the respective pathways with a p value <0.05 are listed.
Macrophage marker
gene_id	TERC_mock_1	TERC_mock_2	TERC_mock_3	WT_mock_1	WT_mock_2	WT_mock_3	TERC_mock	WT_mock	log2FoldChange	pvalue	padj	gene_name	gene_chr	gene_start	gene_end	gene_strand	gene_length	gene_biotype	gene_description	tf_family	TERC_mock_1_count	TERC_mock_2_count	TERC_mock_3_count	WT_mock_1_count	WT_mock_2_count	WT_mock_3_count	TERC_mock_1_fpkm	TERC_mock_2_fpkm	TERC_mock_3_fpkm	WT_mock_1_fpkm	WT_mock_2_fpkm	WT_mock_3_fpkm
ENSMUSG00000026390	123.665	12.9182	118.622	0	19.6114	30.4808	85.0682	16.6974	2.3326	0.0437746	0.983619	Marco	1	120474538	120505024	-	1925	protein_coding	macrophage receptor with collagenous structure [Source:MGI Symbol;Acc:MGI:1309998]	-	307	12	83	0	20	33	5.79264	0.602472	5.56888	0	0.917429	1.48839
Chemokine signaling
gene_id	TERC_mock_1	TERC_mock_2	TERC_mock_3	WT_mock_1	WT_mock_2	WT_mock_3	TERC_mock	WT_mock	log2FoldChange	pvalue	padj	gene_name	gene_chr	gene_start	gene_end	gene_strand	gene_length	gene_biotype	gene_description	tf_family	TERC_mock_1_count	TERC_mock_2_count	TERC_mock_3_count	WT_mock_1_count	WT_mock_2_count	WT_mock_3_count	TERC_mock_1_fpkm	TERC_mock_2_fpkm	TERC_mock_3_fpkm	WT_mock_1_fpkm	WT_mock_2_fpkm	WT_mock_3_fpkm
ENSMUSG00000031955	256.192	192.696	214.377	111.702	122.571	133.007	221.088	122.427	0.853155	0.0382863	0.983619	Bcar1	8	111710474	111743809	-	4547	protein_coding	breast cancer anti-estrogen resistance 1 [Source:MGI Symbol;Acc:MGI:108091]	-	636	179	150	72	125	144	5.08043	3.80465	4.26076	2.19333	2.4275	2.74962
ENSMUSG00000028698	218.73	197.002	368.728	52.7483	134.338	169.954	261.486	119.013	1.12738	0.0419194	0.983619	Pik3r3	4	116221618	116303056	+	5300	protein_coding	phosphoinositide-3-kinase regulatory subunit 3 [Source:MGI Symbol;Acc:MGI:109277]	-	543	183	258	34	137	184	3.72128	3.33704	6.28731	0.888584	2.28254	3.01423
ENSMUSG00000039936	187.31	207.767	167.214	58.9539	81.3874	139.473	187.43	93.2714	1.00098	0.0486298	0.983619	Pik3cd	4	149649168	149702571	-	6259	protein_coding	phosphatidylinositol-4,5-bisphosphate 3-kinase catalytic subunit delta [Source:MGI Symbol;Acc:MGI:1098211]	-	465	193	117	38	83	151	2.69846	2.98015	2.41436	0.840958	1.17097	2.09463
T helper marker
gene_id	TERC_mock_1	TERC_mock_2	TERC_mock_3	WT_mock_1	WT_mock_2	WT_mock_3	TERC_mock	WT_mock	log2FoldChange	pvalue	padj	gene_name	gene_chr	gene_start	gene_end	gene_strand	gene_length	gene_biotype	gene_description	tf_family	TERC_mock_1_count	TERC_mock_2_count	TERC_mock_3_count	WT_mock_1_count	WT_mock_2_count	WT_mock_3_count	TERC_mock_1_fpkm	TERC_mock_2_fpkm	TERC_mock_3_fpkm	WT_mock_1_fpkm	WT_mock_2_fpkm	WT_mock_3_fpkm
ENSMUSG00000026285	0.805634	0	0	0	10.7863	31.4045	0.268545	14.0636	-5.09941	0.0340606	0.983619	Pdcd1	1	94038305	94052553	-	1930	protein_coding	programmed cell death 1 [Source:MGI Symbol;Acc:MGI:104879]	-	2	0	0	0	11	34	0.0376393	0	0	0	0.503279	1.52953
TCR signaling
gene_id	TERC_mock_1	TERC_mock_2	TERC_mock_3	WT_mock_1	WT_mock_2	WT_mock_3	TERC_mock	WT_mock	log2FoldChange	pvalue	padj	gene_name	gene_chr	gene_start	gene_end	gene_strand	gene_length	gene_biotype	gene_description	tf_family	TERC_mock_1_count	TERC_mock_2_count	TERC_mock_3_count	WT_mock_1_count	WT_mock_2_count	WT_mock_3_count	TERC_mock_1_fpkm	TERC_mock_2_fpkm	TERC_mock_3_fpkm	WT_mock_1_fpkm	WT_mock_2_fpkm	WT_mock_3_fpkm
ENSMUSG00000021250	532.524	191.619	222.952	628.325	629.526	674.273	315.698	644.041	-1.02324	0.0286704	0.983619	Fos	12	85473890	85477273	+	2352	protein_coding	FBJ osteosarcoma oncogene [Source:MGI Symbol;Acc:MGI:95574]	TF_bZIP	1322	178	156	405	642	730	20.4156	7.31423	8.56659	23.8514	24.103	26.9476
ENSMUSG00000026285	0.805634	0	0	0	10.7863	31.4045	0.268545	14.0636	-5.09941	0.0340606	0.983619	Pdcd1	1	94038305	94052553	-	1930	protein_coding	programmed cell death 1 [Source:MGI Symbol;Acc:MGI:104879]	-	2	0	0	0	11	34	0.0376393	0	0	0	0.503279	1.52953
ENSMUSG00000033016	230.009	266.975	221.522	77.571	182.386	93.2898	239.502	117.749	1.02015	0.0376181	0.983619	Nfatc1	18	80606205	80713071	-	7433	protein_coding	nuclear factor of activated T cells, cytoplasmic, calcineurin dependent 1 [Source:MGI Symbol;Acc:MGI:102469]	RHD	571	248	155	50	186	101	2.79023	3.22458	2.69332	0.931754	2.20964	1.17976
ENSMUSG00000028698	218.73	197.002	368.728	52.7483	134.338	169.954	261.486	119.013	1.12738	0.0419194	0.983619	Pik3r3	4	116221618	116303056	+	5300	protein_coding	phosphoinositide-3-kinase regulatory subunit 3 [Source:MGI Symbol;Acc:MGI:109277]	-	543	183	258	34	137	184	3.72128	3.33704	6.28731	0.888584	2.28254	3.01423
ENSMUSG00000039936	187.31	207.767	167.214	58.9539	81.3874	139.473	187.43	93.2714	1.00098	0.0486298	0.983619	Pik3cd	4	149649168	149702571	-	6259	protein_coding	phosphatidylinositol-4,5-bisphosphate 3-kinase catalytic subunit delta [Source:MGI Symbol;Acc:MGI:1098211]	-	465	193	117	38	83	151	2.69846	2.98015	2.41436	0.840958	1.17097	2.09463

## Sheet: TERC_Sa vs Old_WT_Sa
Supplemental Table 3f. DEG of Tercko/ko S. aureus mice vs. Old WT S. aureus mice. All genes belonging to the respective pathways with a p value <0.05 are listed.
NLRP3 inflammasome signaling
gene_id	TERC_Sa_1	TERC_Sa_2	TERC_Sa_3	old_Sa_1	old_Sa_2	old_Sa_3	TERC_Sa	old_Sa	log2FoldChange	pvalue	padj	gene_name	gene_chr	gene_start	gene_end	gene_strand	gene_length	gene_biotype	gene_description	tf_family	TERC_Sa_1_count	TERC_Sa_2_count	TERC_Sa_3_count	old_Sa_1_count	old_Sa_2_count	old_Sa_3_count	TERC_Sa_1_fpkm	TERC_Sa_2_fpkm	TERC_Sa_3_fpkm	old_Sa_1_fpkm	old_Sa_2_fpkm	old_Sa_3_fpkm
ENSMUSG00000019850	5121.48	114.233	2427.55	53.7313	87.1077	99.1414	2554.42	79.9935	4.99685	7.62687e-07	0.000109103	Tnfaip3	10	19000910	19015657	-	7226	protein_coding	tumor necrosis factor, alpha-induced protein 3 [Source:MGI Symbol;Acc:MGI:1196377]	-	3172	108	1939	79	64	222	67.5375	1.41024	32.034	0.659122	1.09082	1.25192
ENSMUSG00000027398	4049.39	67.6939	3978.73	19.7242	119.773	55.8229	2698.6	65.1067	5.3779	2.46913e-06	0.000271315	Il1b	2	129364570	129371139	-	1907	protein_coding	interleukin 1 beta [Source:MGI Symbol;Acc:MGI:96543]	-	2508	64	3178	29	88	125	202.342	3.16663	198.946	0.91682	5.68336	2.67105
ENSMUSG00000032691	382.658	10.5772	455.713	4.761	14.9716	3.57266	282.983	7.76843	5.23191	8.51224e-06	0.000686459	Nlrp3	11	59541568	59566956	+	4057	protein_coding	NLR family, pyrin domain containing 3 [Source:MGI Symbol;Acc:MGI:2653833]	-	237	10	364	7	11	8	8.9878	0.232575	10.7109	0.104023	0.333934	0.0803541
ENSMUSG00000035385	1083.39	23.2698	112.676	6.80143	20.4159	5.80558	406.446	11.0076	5.23331	1.63613e-05	0.00112812	Ccl2	11	82035571	82037453	+	1138	protein_coding	chemokine (C-C motif) ligand 2 [Source:MGI Symbol;Acc:MGI:98259]	-	671	22	90	10	15	13	90.7173	1.8241	9.44129	0.529779	1.62339	0.465505
ENSMUSG00000038357	678.128	0	350.549	1.36029	0	4.01925	342.892	1.79318	7.48527	2.32813e-05	0.00144973	Camp	9	109847379	109849617	-	758	protein_coding	cathelicidin antimicrobial peptide [Source:MGI Symbol;Acc:MGI:108443]	-	420	0	280	2	0	9	85.2491	0	44.0981	0.159073	0	0.483834
ENSMUSG00000021025	14214.9	888.483	8434.45	494.464	902.381	590.383	7845.93	662.409	3.56647	2.71419e-05	0.00160127	Nfkbia	12	55489410	55492647	-	1610	protein_coding	nuclear factor of kappa light polypeptide gene enhancer in B cells inhibitor, alpha [Source:MGI Symbol;Acc:MGI:104741]	-	8804	840	6737	727	663	1322	841.326	49.229	499.542	27.2236	50.7178	33.4602
ENSMUSG00000029380	4855.07	0	862.6	1.36029	2.72212	4.01925	1905.89	2.70055	9.45782	4.36069e-05	0.00217919	Cxcl1	5	90891241	90893115	+	1875	protein_coding	chemokine (C-X-C motif) ligand 1 [Source:MGI Symbol;Acc:MGI:108068]	-	3007	0	689	2	2	9	246.741	0	43.8681	0.0643081	0.131372	0.195598
ENSMUSG00000058427	22838.4	0	9044.15	1.36029	5.44423	0	10627.5	2.26817	12.2304	7.39115e-05	0.00310693	Cxcl2	5	90903871	90905938	+	2068	protein_coding	chemokine (C-X-C motif) ligand 2 [Source:MGI Symbol;Acc:MGI:1340094]	-	14145	0	7224	2	4	0	1052.36	0	417.021	0.0583064	0.238222	0
ENSMUSG00000055994	90.4171	40.1933	116.432	2.72057	10.8885	12.0577	82.3475	8.55559	3.27153	0.000191307	0.00592965	Nod2	8	88647315	88688474	+	5014	protein_coding	nucleotide-binding oligomerization domain containing 2 [Source:MGI Symbol;Acc:MGI:2429397]	-	56	38	93	4	8	27	1.71836	0.7151	2.21427	0.0480964	0.196507	0.219433
ENSMUSG00000029379	5077.89	0	1537.41	0	0	0.446583	2205.1	0.148861	13.062	0.000194549	0.0060026	Cxcl3	5	90786103	90789600	+	3498	protein_coding	chemokine (C-X-C motif) ligand 3 [Source:MGI Symbol;Acc:MGI:3037818]	-	3145	0	1228	0	0	1	138.328	0	41.9092	0	0	0.0116494
ENSMUSG00000022610	182.449	163.946	137.715	685.584	285.822	810.548	161.37	593.985	-1.88249	0.000359851	0.00914965	Mapk12	15	89130584	89140703	-	3805	protein_coding	mitogen-activated protein kinase 12 [Source:MGI Symbol;Acc:MGI:1353438]	-	113	155	110	1008	210	1815	4.56913	3.84366	3.45119	15.9714	6.79732	19.4377
ENSMUSG00000025746	382.658	4.23087	87.6371	0	0	6.25216	158.175	2.08405	6.14441	0.000423003	0.0102161	Il6	5	30013114	30019981	+	2428	protein_coding	interleukin 6 [Source:MGI Symbol;Acc:MGI:96559]	-	237	4	70	0	0	14	15.0179	0.155446	3.44176	0	0	0.234965
ENSMUSG00000007659	3306.68	1250.22	2953.37	584.243	871.077	877.982	2503.43	777.767	1.68644	0.00077098	0.0151376	Bcl2l1	2	152780668	152831728	-	4586	protein_coding	BCL2-like 1 [Source:MGI Symbol;Acc:MGI:88139]	-	2048	1182	2359	859	640	1966	68.7078	24.3193	61.408	11.2926	17.1877	17.4692
ENSMUSG00000046879	1341.72	810.211	950.237	223.087	513.119	278.668	1034.06	338.291	1.61478	0.000999435	0.0181093	Irgm1	11	48861968	48871683	-	5810	protein_coding	immunity-related GTPase family M member 1 [Source:MGI Symbol;Acc:MGI:107567]	-	831	766	759	328	377	624	22.0057	12.44	15.5954	3.40357	7.99168	4.37655
ENSMUSG00000032508	1493.5	362.797	1608.77	350.274	194.631	261.251	1155.02	268.719	2.10234	0.00110884	0.0193455	Myd88	9	119335934	119341411	-	2576	protein_coding	myeloid differentiation primary response gene 88 [Source:MGI Symbol;Acc:MGI:108005]	-	925	343	1285	515	143	585	55.2466	12.5636	59.5509	12.0531	6.83696	9.25408
ENSMUSG00000052684	1097.92	909.637	984.04	331.23	495.425	522.502	997.199	449.719	1.14893	0.0013779	0.0221667	Jun	4	95049034	95052222	-	3189	protein_coding	jun proto-oncogene [Source:MGI Symbol;Acc:MGI:96646]	TF_bZIP	680	860	786	487	364	1170	32.8068	25.4455	29.4238	9.20685	14.0579	14.9505
ENSMUSG00000028268	1945.58	849.347	1026.61	259.815	589.338	294.298	1273.85	381.15	1.74274	0.00161411	0.0245183	Gbp3	3	142560026	142573209	+	3265	protein_coding	guanylate binding protein 3 [Source:MGI Symbol;Acc:MGI:1926263]	-	1205	803	820	382	433	659	56.7824	23.206	29.9821	7.0537	16.3334	8.2248
ENSMUSG00000042644	41.9794	107.887	37.5588	327.149	133.384	376.47	62.4751	279.001	-2.15549	0.00177838	0.0260161	Itpr3	17	27057304	27122223	+	8990	protein_coding	inositol 1,4,5-triphosphate receptor 3 [Source:MGI Symbol;Acc:MGI:96624]	-	26	102	30	481	98	843	0.444963	1.07055	0.398375	3.22569	1.34258	3.82112
ENSMUSG00000032000	3214.65	233.756	2302.35	165.955	481.814	235.349	1916.92	294.373	2.70429	0.00203272	0.0285248	Birc3	9	7848699	7873186	-	5009	protein_coding	baculoviral IAP repeat-containing 3 [Source:MGI Symbol;Acc:MGI:1197007]	-	1991	221	1839	244	354	527	61.1547	4.16302	43.829	2.93681	8.70413	4.28729
ENSMUSG00000028270	1937.51	1093.68	1146.79	281.579	705.028	441.224	1392.66	475.944	1.55048	0.00244351	0.032536	Gbp2	3	142620602	142638008	+	2516	protein_coding	guanylate binding protein 2 [Source:MGI Symbol;Acc:MGI:102772]	-	1200	1034	916	414	518	988	73.3805	38.7773	43.4626	9.92034	25.3567	16.0018
ENSMUSG00000028367	4141.43	3324.41	4095.16	2385.26	2047.03	1881.01	3853.66	2104.43	0.872716	0.00346546	0.0404995	Txn1	4	57943373	57956411	-	1051	protein_coding	thioredoxin 1 [Source:MGI Symbol;Acc:MGI:98874]	-	2565	3143	3271	3507	1504	4212	375.487	282.169	371.543	201.173	176.246	163.309
ENSMUSG00000105504	1684.02	174.523	469.485	48.9703	213.686	123.704	776.009	128.787	2.59341	0.0037699	0.0429311	Gbp5	3	142493978	142522344	+	6637	protein_coding	guanylate binding protein 5 [Source:MGI Symbol;Acc:MGI:2429943]	-	1043	165	375	72	157	277	24.1781	2.34574	6.74513	0.654029	2.9134	1.70071
ENSMUSG00000034786	122.709	155.484	222.849	19.044	43.5538	69.2204	167.014	43.9394	1.9223	0.00402624	0.044504	Gpsm3	17	34589806	34591754	+	1343	protein_coding	G-protein signalling modulator 3 (AGS3-like, C. elegans) [Source:MGI Symbol;Acc:MGI:2146785]	-	76	147	178	28	32	155	8.70658	10.3278	15.8225	1.25695	2.93459	4.70304
ENSMUSG00000043909	16.1459	87.7905	60.094	287.701	159.244	206.321	54.6768	217.755	-1.9862	0.00552686	0.0546325	Trp53bp1	2	121193281	121271407	-	14164	protein_coding	transformation related protein 53 binding protein 1 [Source:MGI Symbol;Acc:MGI:1351320]	-	10	83	48	423	117	462	0.108624	0.552917	0.404563	1.80049	1.01736	1.32917
ENSMUSG00000073489	108.178	52.8859	112.676	16.3234	38.1096	21.436	91.2466	25.2897	1.86949	0.00617186	0.058364	Ifi204	1	173747293	173766943	-	3561	protein_coding	interferon activated gene 204 [Source:MGI Symbol;Acc:MGI:96429]	-	67	50	90	24	28	48	2.89476	1.32485	3.01718	0.406327	0.96841	0.549278
ENSMUSG00000078942	0	0	0	7.48158	12.2495	16.9702	0	12.2338	-5.69134	0.0116168	0.0869586	Naip6	13	100281121	100317674	-	6827	protein_coding	NLR family, apoptosis inhibitory protein 6 [Source:MGI Symbol;Acc:MGI:1298222]	-	0	0	0	11	9	38	0	0	0	0.0971403	0.162362	0.226818
ENSMUSG00000020572	1985.95	775.307	1463.54	578.802	646.502	656.031	1408.26	627.112	1.16665	0.0117684	0.0874367	Nampt	12	32819545	32853349	+	5054	protein_coding	nicotinamide phosphoribosyltransferase [Source:MGI Symbol;Acc:MGI:1929865]	-	1230	733	1169	851	475	1469	37.4438	13.6847	27.6128	10.1515	11.5753	11.8443
ENSMUSG00000015755	1551.62	1073.58	1595	501.946	925.519	613.159	1406.73	680.208	1.04958	0.011787	0.0874371	Tab2	10	7905653	7956230	-	6135	protein_coding	TGF-beta activated kinase 1/MAP3K7 binding protein 2 [Source:MGI Symbol;Acc:MGI:1915902]	-	961	1015	1274	738	680	1373	24.1001	15.6106	24.7905	7.25234	13.6511	9.11967
ENSMUSG00000039217	0	12.6926	0	59.8526	48.9981	66.9875	4.23087	58.6127	-3.74692	0.012807	0.0917759	Il18	9	50554827	50581840	+	1031	protein_coding	interleukin 18 [Source:MGI Symbol;Acc:MGI:107936]	-	0	12	0	88	36	150	0	1.09822	0	5.14589	4.30048	5.92865
ENSMUSG00000078817	0	7.40402	164.007	2.72057	4.08317	1.78633	57.1369	2.86336	4.34625	0.0135217	0.0949449	Nlrp12	7	3218784	3249740	-	7545	protein_coding	NLR family, pyrin domain containing 12 [Source:MGI Symbol;Acc:MGI:2676630]	-	0	7	131	4	3	4	0	0.0875399	2.07273	0.0319623	0.0489706	0.0216035
ENSMUSG00000021408	552.19	168.177	478.248	184.319	136.106	136.208	399.538	152.211	1.39039	0.0160936	0.105329	Ripk1	13	34002363	34037147	+	8344	protein_coding	receptor (TNFRSF)-interacting serine-threonine kinase 1 [Source:MGI Symbol;Acc:MGI:108212]	-	342	159	382	271	100	305	6.30611	1.798	5.46538	1.95809	1.47604	1.48953
ENSMUSG00000027164	1291.67	160.773	708.609	208.804	243.629	185.779	720.352	212.737	1.75961	0.0166249	0.107335	Traf6	2	101678429	101701669	+	7883	protein_coding	TNF receptor-associated factor 6 [Source:MGI Symbol;Acc:MGI:108072]	-	800	152	566	307	179	416	15.6138	1.81936	8.57148	2.34792	2.79663	2.15043
ENSMUSG00000024401	691.045	0	492.02	2.04043	0	13.3975	394.355	5.14597	6.24119	0.0193497	0.117941	Tnf	17	35199381	35202007	-	1639	protein_coding	tumor necrosis factor [Source:MGI Symbol;Acc:MGI:104798]	-	428	0	393	3	0	30	40.1767	0	28.6249	0.110352	0	0.745874
ENSMUSG00000035352	237.345	17.9812	152.739	21.7646	47.637	15.6304	136.022	28.344	2.27409	0.021008	0.123112	Ccl12	11	82101845	82103400	+	537	protein_coding	chemokine (C-C motif) ligand 12 [Source:MGI Symbol;Acc:MGI:108224]	-	147	17	122	32	35	35	42.1166	2.98705	27.1217	3.59263	8.02725	2.65593
ENSMUSG00000024960	125.938	874.732	207.825	2022.07	896.937	1299.56	402.832	1406.19	-1.80243	0.0210659	0.123273	Plcb3	19	6953714	6969759	-	4201	protein_coding	phospholipase C, beta 3 [Source:MGI Symbol;Acc:MGI:104778]	-	78	827	166	2973	659	2910	2.85662	18.5746	4.71722	42.6657	19.3199	28.2269
ENSMUSG00000029468	14.5313	81.4442	23.7872	104.742	138.828	154.071	39.9209	132.547	-1.7202	0.0294113	0.151657	P2rx7	5	122643911	122691432	+	5970	protein_coding	purinergic receptor P2X, ligand-gated ion channel, 7 [Source:MGI Symbol;Acc:MGI:1339957]	-	9	77	19	154	102	345	0.231941	1.21698	0.379936	1.55519	2.10426	2.35488
ENSMUSG00000022534	0	10.5772	62.598	2.72057	0	0.893166	24.3917	1.20458	4.28034	0.0382651	0.178103	Mefv	16	3707218	3718097	-	3251	protein_coding	Mediterranean fever [Source:MGI Symbol;Acc:MGI:1859396]	-	0	10	50	4	0	2	0	0.290235	1.83605	0.0741788	0	0.025069
ENSMUSG00000030102	192.136	349.047	242.88	652.937	298.072	668.088	261.354	539.699	-1.0463	0.0420177	0.18891	Itpr1	6	108213096	108551109	+	18319	protein_coding	inositol 1,4,5-trisphosphate receptor 1 [Source:MGI Symbol;Acc:MGI:96623]	-	119	330	194	960	219	1496	0.999436	1.69973	1.26424	3.15941	1.47236	3.32777
ENSMUSG00000028530	2394.44	1029.16	1786.55	622.331	1211.34	777.055	1736.71	870.242	0.997436	0.0451093	0.196511	Jak1	4	101152367	101265282	-	7227	protein_coding	Janus kinase 1 [Source:MGI Symbol;Acc:MGI:96628]	-	1483	973	1427	915	890	1740	31.5713	12.7035	23.572	7.63308	15.1672	9.81102
ENSMUSG00000028163	1001.05	664.246	1039.13	569.28	583.894	505.085	901.473	552.753	0.705672	0.0471097	0.201409	Nfkb1	3	135584655	135691547	-	12061	protein_coding	nuclear factor of kappa light polypeptide gene enhancer in B cells 1, p105 [Source:MGI Symbol;Acc:MGI:97312]	RHD	620	628	830	837	429	1131	7.90894	4.91297	8.21535	4.18388	4.38074	3.82122
ENSMUSG00000025888	27.448	15.8658	0	48.9703	99.3572	78.152	14.4379	75.4932	-2.39445	0.0480447	0.203599	Casp1	9	5298517	5307265	+	1497	protein_coding	caspase 1 [Source:MGI Symbol;Acc:MGI:96544]	-	17	15	0	72	73	175	1.74718	0.945446	0	2.89966	6.00584	4.76365
ENSMUSG00000027668	221.199	301.449	125.196	446.174	435.538	360.393	215.948	414.035	-0.937678	0.0495507	0.207086	Mfn1	3	32529465	32579239	+	6114	protein_coding	mitofusin 1 [Source:MGI Symbol;Acc:MGI:1914664]	-	137	285	100	656	320	807	3.44751	4.39832	1.95257	6.46867	6.44611	5.37862
Macrophage marker
gene_id	TERC_Sa_1	TERC_Sa_2	TERC_Sa_3	old_Sa_1	old_Sa_2	old_Sa_3	TERC_Sa	old_Sa	log2FoldChange	pvalue	padj	gene_name	gene_chr	gene_start	gene_end	gene_strand	gene_length	gene_biotype	gene_description	tf_family	TERC_Sa_1_count	TERC_Sa_2_count	TERC_Sa_3_count	old_Sa_1_count	old_Sa_2_count	old_Sa_3_count	TERC_Sa_1_fpkm	TERC_Sa_2_fpkm	TERC_Sa_3_fpkm	old_Sa_1_fpkm	old_Sa_2_fpkm	old_Sa_3_fpkm
ENSMUSG00000026390	122.709	71.9248	142.723	3.40072	5.44423	10.718	112.452	6.52098	4.06552	7.9475e-08	1.91453e-05	Marco	1	120474538	120505024	-	1925	protein_coding	macrophage receptor with collagenous structure [Source:MGI Symbol;Acc:MGI:1309998]	-	76	68	114	5	4	24	6.07425	3.33308	7.06977	0.156594	0.255919	0.508047
ENSMUSG00000027398	4049.39	67.6939	3978.73	19.7242	119.773	55.8229	2698.6	65.1067	5.3779	2.46913e-06	0.000271315	Il1b	2	129364570	129371139	-	1907	protein_coding	interleukin 1 beta [Source:MGI Symbol;Acc:MGI:96543]	-	2508	64	3178	29	88	125	202.342	3.16663	198.946	0.91682	5.68336	2.67105
ENSMUSG00000031779	771.774	122.695	971.52	11.5624	68.0529	25.4552	621.997	35.0235	4.16629	4.29526e-06	0.000405568	Ccl22	8	94745590	94751699	+	2325	protein_coding	chemokine (C-C motif) ligand 22 [Source:MGI Symbol;Acc:MGI:1306779]	-	478	116	776	17	50	57	31.6311	4.70763	39.8446	0.440821	2.64862	0.999022
ENSMUSG00000040809	1427.3	519.339	759.939	165.955	87.1077	210.341	902.192	154.468	2.54071	1.28709e-05	0.000941028	Chil3	3	106147554	106167564	-	1632	protein_coding	chitinase-like 3 [Source:MGI Symbol;Acc:MGI:1330860]	-	884	491	607	244	64	471	83.3378	28.3876	44.4017	9.01377	4.82984	11.7604
ENSMUSG00000035385	1083.39	23.2698	112.676	6.80143	20.4159	5.80558	406.446	11.0076	5.23331	1.63613e-05	0.00112812	Ccl2	11	82035571	82037453	+	1138	protein_coding	chemokine (C-C motif) ligand 2 [Source:MGI Symbol;Acc:MGI:98259]	-	671	22	90	10	15	13	90.7173	1.8241	9.44129	0.529779	1.62339	0.465505
ENSMUSG00000058427	22838.4	0	9044.15	1.36029	5.44423	0	10627.5	2.26817	12.2304	7.39115e-05	0.00310693	Cxcl2	5	90903871	90905938	+	2068	protein_coding	chemokine (C-X-C motif) ligand 2 [Source:MGI Symbol;Acc:MGI:1340094]	-	14145	0	7224	2	4	0	1052.36	0	417.021	0.0583064	0.238222	0
ENSMUSG00000051439	11161.7	217.89	4941.48	520.31	183.743	219.272	5440.35	307.775	4.14327	7.95279e-05	0.00328424	Cd14	18	36725074	36726736	-	1572	protein_coding	CD14 antigen [Source:MGI Symbol;Acc:MGI:88318]	-	6913	206	3947	765	135	491	676.587	12.3647	299.741	29.339	10.5768	12.7278
ENSMUSG00000079018	3548.87	1961.01	2680.44	940.638	1083.4	973.551	2730.11	999.197	1.45013	8.85631e-05	0.00349939	Ly6c1	15	75044018	75048830	-	1677	protein_coding	lymphocyte antigen 6 complex, locus C1 [Source:MGI Symbol;Acc:MGI:96882]	-	2198	1854	2141	1383	796	2180	201.653	104.314	152.41	49.7194	58.4592	52.972
ENSMUSG00000027995	734.639	22.2121	600.94	27.2057	17.6938	46.8912	452.597	30.5969	3.8782	0.000204732	0.00624498	Tlr2	3	83836272	83841767	-	3014	protein_coding	toll-like receptor 2 [Source:MGI Symbol;Acc:MGI:1346060]	-	455	21	480	40	13	105	23.2262	0.657421	19.0121	0.800117	0.531218	1.41961
ENSMUSG00000025746	382.658	4.23087	87.6371	0	0	6.25216	158.175	2.08405	6.14441	0.000423003	0.0102161	Il6	5	30013114	30019981	+	2428	protein_coding	interleukin 6 [Source:MGI Symbol;Acc:MGI:96559]	-	237	4	70	0	0	14	15.0179	0.155446	3.44176	0	0	0.234965
ENSMUSG00000002147	261.564	426.26	346.793	1088.91	628.809	793.578	344.872	837.099	-1.27861	0.00233392	0.0315272	Stat6	10	127642986	127660957	+	4402	protein_coding	signal transducer and activator of transcription 6 [Source:MGI Symbol;Acc:MGI:103034]	STAT	162	403	277	1601	462	1777	5.66207	8.63818	7.51209	21.9269	12.926	16.4498
ENSMUSG00000030786	169.532	59.2322	381.848	23.805	25.8601	58.949	203.537	36.2047	2.48175	0.0027736	0.0353605	Itgam	7	128062640	128118491	+	5024	protein_coding	integrin alpha M [Source:MGI Symbol;Acc:MGI:96607]	-	105	56	305	35	19	132	3.21551	1.05173	7.24738	0.420006	0.465776	1.07065
ENSMUSG00000079293	266.407	167.119	426.918	57.8122	123.856	76.8123	286.815	86.1602	1.74184	0.00287565	0.0359743	Clec7a	6	129461591	129472779	-	2638	polymorphic_pseudogene	C-type lectin domain family 7, member a [Source:MGI Symbol;Acc:MGI:1861431]	-	165	158	341	85	91	172	9.62319	5.65132	15.4316	1.94259	4.24854	2.65691
ENSMUSG00000075122	116.251	10.5772	174.022	9.52201	20.4159	8.03849	100.283	12.6588	3.00744	0.00441705	0.0471302	Cd80	16	38455561	38496335	+	3703	protein_coding	CD80 antigen [Source:MGI Symbol;Acc:MGI:101775]	-	72	10	139	14	15	18	2.9915	0.254808	4.48118	0.227935	0.498897	0.198081
ENSMUSG00000022667	54.8961	29.6161	180.282	12.9227	9.5274	24.5621	88.2648	15.6707	2.47518	0.00767242	0.0671164	Cd200r1	16	44765736	44794978	+	3348	protein_coding	CD200 receptor 1 [Source:MGI Symbol;Acc:MGI:1889024]	-	34	28	144	19	7	55	1.56244	0.789115	5.13462	0.342141	0.257505	0.669423
ENSMUSG00000061100	2652.77	1006.95	753.679	583.563	181.021	632.362	1471.13	465.648	1.65783	0.0178394	0.112258	Retnla	16	48842551	48844461	+	599	protein_coding	resistin like alpha [Source:MGI Symbol;Acc:MGI:1888504]	-	1643	952	602	858	133	1416	422.008	149.961	119.978	86.3569	27.3463	96.3296
ENSMUSG00000024401	691.045	0	492.02	2.04043	0	13.3975	394.355	5.14597	6.24119	0.0193497	0.117941	Tnf	17	35199381	35202007	-	1639	protein_coding	tumor necrosis factor [Source:MGI Symbol;Acc:MGI:104798]	-	428	0	393	3	0	30	40.1767	0	28.6249	0.110352	0	0.745874
ENSMUSG00000014599	804.066	140.676	458.217	97.9406	46.276	229.544	467.653	124.587	1.90261	0.0213925	0.124486	Csf1	3	107741048	107760469	-	5281	protein_coding	colony stimulating factor 1 (macrophage) [Source:MGI Symbol;Acc:MGI:1339753]	-	498	133	366	144	34	514	14.5085	2.37631	8.27363	1.64393	0.792932	3.96616
ENSMUSG00000050335	1743.76	908.579	2173.4	725.713	943.213	742.221	1608.58	803.716	1.00134	0.0282509	0.148071	Lgals3	14	47367751	47386160	+	1858	protein_coding	lectin, galactose binding, soluble 3 [Source:MGI Symbol;Acc:MGI:96778]	-	1080	859	1736	1067	693	1662	89.431	43.6229	111.541	34.6223	45.9368	36.4509
ENSMUSG00000026072	587.711	216.832	811.269	253.693	232.741	223.738	538.604	236.724	1.18547	0.0392889	0.181296	Il1r1	1	40225080	40317257	+	6363	protein_coding	interleukin 1 receptor, type I [Source:MGI Symbol;Acc:MGI:96545]	-	364	205	648	373	171	501	8.80135	3.0399	12.1575	3.53414	3.30984	3.20848
Chemokine signaling
gene_id	TERC_Sa_1	TERC_Sa_2	TERC_Sa_3	old_Sa_1	old_Sa_2	old_Sa_3	TERC_Sa	old_Sa	log2FoldChange	pvalue	padj	gene_name	gene_chr	gene_start	gene_end	gene_strand	gene_length	gene_biotype	gene_description	tf_family	TERC_Sa_1_count	TERC_Sa_2_count	TERC_Sa_3_count	old_Sa_1_count	old_Sa_2_count	old_Sa_3_count	TERC_Sa_1_fpkm	TERC_Sa_2_fpkm	TERC_Sa_3_fpkm	old_Sa_1_fpkm	old_Sa_2_fpkm	old_Sa_3_fpkm
ENSMUSG00000000982	4659.71	8.46174	3013.47	3.40072	9.5274	9.82483	2560.55	7.58432	8.40364	3.14169e-10	2.93275e-07	Ccl3	11	83647844	83649355	-	766	protein_coding	chemokine (C-C motif) ligand 3 [Source:MGI Symbol;Acc:MGI:98260]	-	2886	8	2407	5	7	22	579.666	0.985437	375.127	0.39353	1.12549	1.17035
ENSMUSG00000031779	771.774	122.695	971.52	11.5624	68.0529	25.4552	621.997	35.0235	4.16629	4.29526e-06	0.000405568	Ccl22	8	94745590	94751699	+	2325	protein_coding	chemokine (C-C motif) ligand 22 [Source:MGI Symbol;Acc:MGI:1306779]	-	478	116	776	17	50	57	31.6311	4.70763	39.8446	0.440821	2.64862	0.999022
ENSMUSG00000035385	1083.39	23.2698	112.676	6.80143	20.4159	5.80558	406.446	11.0076	5.23331	1.63613e-05	0.00112812	Ccl2	11	82035571	82037453	+	1138	protein_coding	chemokine (C-C motif) ligand 2 [Source:MGI Symbol;Acc:MGI:98259]	-	671	22	90	10	15	13	90.7173	1.8241	9.44129	0.529779	1.62339	0.465505
ENSMUSG00000021025	14214.9	888.483	8434.45	494.464	902.381	590.383	7845.93	662.409	3.56647	2.71419e-05	0.00160127	Nfkbia	12	55489410	55492647	-	1610	protein_coding	nuclear factor of kappa light polypeptide gene enhancer in B cells inhibitor, alpha [Source:MGI Symbol;Acc:MGI:104741]	-	8804	840	6737	727	663	1322	841.326	49.229	499.542	27.2236	50.7178	33.4602
ENSMUSG00000029380	4855.07	0	862.6	1.36029	2.72212	4.01925	1905.89	2.70055	9.45782	4.36069e-05	0.00217919	Cxcl1	5	90891241	90893115	+	1875	protein_coding	chemokine (C-X-C motif) ligand 1 [Source:MGI Symbol;Acc:MGI:108068]	-	3007	0	689	2	2	9	246.741	0	43.8681	0.0643081	0.131372	0.195598
ENSMUSG00000018930	1283.6	15.8658	483.256	2.04043	35.3875	3.12608	594.241	13.518	5.49179	5.46803e-05	0.00251209	Ccl4	11	83662584	83664683	+	660	protein_coding	chemokine (C-C motif) ligand 4 [Source:MGI Symbol;Acc:MGI:98261]	-	795	15	386	3	26	7	185.325	2.14444	69.8191	0.27404	4.85179	0.432193
ENSMUSG00000058427	22838.4	0	9044.15	1.36029	5.44423	0	10627.5	2.26817	12.2304	7.39115e-05	0.00310693	Cxcl2	5	90903871	90905938	+	2068	protein_coding	chemokine (C-X-C motif) ligand 2 [Source:MGI Symbol;Acc:MGI:1340094]	-	14145	0	7224	2	4	0	1052.36	0	417.021	0.0583064	0.238222	0
ENSMUSG00000018920	1684.02	561.648	1852.9	238.05	326.654	367.091	1366.19	310.598	2.13667	0.000143277	0.00489488	Cxcl16	11	70453983	70459984	-	3021	protein_coding	chemokine (C-X-C motif) ligand 16 [Source:MGI Symbol;Acc:MGI:1932682]	-	1043	531	1480	350	240	822	53.1182	16.5848	58.4847	6.9848	9.78439	11.0878
ENSMUSG00000019122	729.795	116.349	559.626	57.8122	77.5803	83.0644	468.59	72.819	2.68515	0.000187531	0.00587286	Ccl9	11	83572919	83578636	-	3045	protein_coding	chemokine (C-C motif) ligand 9 [Source:MGI Symbol;Acc:MGI:104533]	-	452	110	447	85	57	186	22.8382	3.40858	17.5247	1.68294	2.30548	2.48914
ENSMUSG00000029379	5077.89	0	1537.41	0	0	0.446583	2205.1	0.148861	13.062	0.000194549	0.0060026	Cxcl3	5	90786103	90789600	+	3498	protein_coding	chemokine (C-X-C motif) ligand 3 [Source:MGI Symbol;Acc:MGI:3037818]	-	3145	0	1228	0	0	1	138.328	0	41.9092	0	0	0.0116494
ENSMUSG00000018012	53.2815	151.254	158.999	733.875	322.571	600.654	121.178	552.366	-2.18584	0.000310679	0.00841351	Rac3	11	120721470	120723969	+	1293	protein_coding	Rac family small GTPase 3 [Source:MGI Symbol;Acc:MGI:2180784]	-	33	143	127	1079	237	1345	3.92668	10.4353	11.7256	50.3106	22.5747	42.3884
ENSMUSG00000026180	234.116	3.17315	174.022	5.44115	0	5.80558	137.104	3.74891	5.13236	0.000351112	0.00899222	Cxcr2	1	74153989	74161246	+	3048	protein_coding	chemokine (C-X-C motif) receptor 2 [Source:MGI Symbol;Acc:MGI:105303]	-	145	3	139	8	0	13	7.31919	0.0928696	5.44416	0.158238	0	0.173801
ENSMUSG00000029372	230.886	278.18	277.935	392.443	1235.84	1531.33	262.334	1053.21	-2.00488	0.000592735	0.0125989	Ppbp	5	90768518	90770063	+	1083	protein_coding	pro-platelet basic protein [Source:MGI Symbol;Acc:MGI:1888712]	-	143	263	222	577	908	3429	20.315	22.9137	24.4712	32.1206	103.26	129.022
ENSMUSG00000071658	41.9794	19.0389	36.3068	3.40072	0	3.12608	32.4417	2.1756	3.77378	0.00122194	0.0205321	Gng3	19	8836929	8839246	-	1699	protein_coding	guanine nucleotide binding protein (G protein), gamma 3 [Source:MGI Symbol;Acc:MGI:102704]	-	26	18	29	5	0	7	2.35445	0.999647	2.03768	0.177424	0	0.167891
ENSMUSG00000028874	100.105	93.0791	455.713	21.0844	35.3875	47.7844	216.299	34.7521	2.63606	0.00133682	0.0217441	Fgr	4	132974095	133001910	+	3863	protein_coding	FGR proto-oncogene, Src family tyrosine kinase [Source:MGI Symbol;Acc:MGI:95527]	-	62	88	364	31	26	107	2.46932	2.14944	11.2488	0.483809	0.828937	1.12871
ENSMUSG00000026166	1666.26	12.6926	285.447	0	44.9149	13.8441	654.799	19.5863	5.07546	0.00144333	0.0227137	Ccl20	1	83116766	83119167	+	1421	protein_coding	chemokine (C-C motif) ligand 20 [Source:MGI Symbol;Acc:MGI:1329031]	-	1032	12	228	0	33	31	111.737	0.79681	19.1545	0	2.86018	0.888977
ENSMUSG00000032192	29.0626	97.31	47.5744	299.263	166.049	230.437	57.9824	231.916	-1.99268	0.00159377	0.0242879	Gnb5	9	75306288	75345876	+	3115	protein_coding	guanine nucleotide binding protein (G protein), beta 5 [Source:MGI Symbol;Acc:MGI:101848]	-	18	92	38	440	122	516	0.889046	2.78675	1.45632	8.51591	4.82364	6.75017
ENSMUSG00000052681	9590.67	2857.95	7891.1	1278.67	2746.61	1709.52	6779.91	1911.6	1.82674	0.00173817	0.0258345	Rap1b	10	117813871	117846035	-	2884	protein_coding	RAS related protein 1b [Source:MGI Symbol;Acc:MGI:894315]	-	5940	2702	6303	1880	2018	3828	316.885	88.4011	260.905	39.3006	86.1785	54.0879
ENSMUSG00000025804	469.846	16.9235	741.16	19.7242	58.5255	41.0856	409.31	39.7784	3.36722	0.00179227	0.026106	Ccr1	9	123962124	123968692	-	2833	protein_coding	chemokine (C-C motif) receptor 1 [Source:MGI Symbol;Acc:MGI:104618]	-	291	16	592	29	43	92	15.8036	0.532894	24.9463	0.617146	1.86937	1.32332
ENSMUSG00000018927	1491.88	376.547	996.559	145.551	342.987	239.369	954.996	242.635	1.97807	0.00187882	0.0270521	Ccl6	11	83587882	83593087	-	1795	protein_coding	chemokine (C-C motif) ligand 6 [Source:MGI Symbol;Acc:MGI:98263]	-	924	356	796	214	252	536	79.1986	18.7134	52.9395	7.18763	17.2906	12.1681
ENSMUSG00000036402	2870.74	912.81	2665.42	501.266	944.574	539.026	2149.66	661.622	1.70082	0.00314151	0.0380832	Gng12	6	66896397	67021350	+	4727	protein_coding	guanine nucleotide binding protein (G protein), gamma 12 [Source:MGI Symbol;Acc:MGI:1336171]	-	1778	863	2129	737	694	1207	57.8703	17.2263	53.7677	9.3998	18.082	10.4051
ENSMUSG00000031780	587.711	55.0013	365.572	16.3234	91.1909	45.1049	336.095	50.8731	2.73108	0.00398593	0.0443733	Ccl17	8	94810453	94812036	+	514	protein_coding	chemokine (C-C motif) ligand 17 [Source:MGI Symbol;Acc:MGI:1329039]	-	364	52	292	24	67	101	108.955	9.5457	67.8189	2.81504	16.0541	8.00721
ENSMUSG00000029053	37.1356	222.121	96.4008	646.816	412.401	396.566	118.552	485.261	-2.02876	0.00405289	0.0446577	Prkcz	4	155260129	155361361	-	6318	protein_coding	protein kinase C, zeta [Source:MGI Symbol;Acc:MGI:97602]	-	23	210	77	951	303	888	0.56009	3.13622	1.45493	9.07481	5.90658	5.72739
ENSMUSG00000029371	1186.72	0	47.5744	6.80143	24.499	12.0577	411.433	14.4527	4.83889	0.0041272	0.0451135	Cxcl5	5	90759360	90761624	+	1863	protein_coding	chemokine (C-X-C motif) ligand 5 [Source:MGI Symbol;Acc:MGI:1096868]	-	735	0	38	10	18	27	60.6994	0	2.43502	0.323611	1.18996	0.590574
ENSMUSG00000000001	1882.61	958.292	1854.15	553.637	915.992	513.124	1565.02	660.917	1.24477	0.00851518	0.0718632	Gnai3	3	108107280	108146146	-	3262	protein_coding	guanine nucleotide binding protein (G protein), alpha inhibiting 3 [Source:MGI Symbol;Acc:MGI:95773]	-	1166	906	1481	814	673	1149	54.9952	26.2067	54.2004	15.0445	25.41	14.3535
ENSMUSG00000031955	599.013	177.697	398.123	132.628	80.3024	175.061	391.611	129.33	1.59251	0.0101166	0.0800722	Bcar1	8	111710474	111743809	-	4547	protein_coding	breast cancer anti-estrogen resistance 1 [Source:MGI Symbol;Acc:MGI:108091]	-	371	168	318	195	59	392	12.5533	3.4862	8.34898	2.58551	1.59809	3.51305
ENSMUSG00000004040	2728.66	1203.68	2481.38	1003.21	944.574	999.453	2137.91	982.413	1.12139	0.0102806	0.0809217	Stat3	11	100885098	100939540	-	9527	protein_coding	signal transducer and activator of transcription 3 [Source:MGI Symbol;Acc:MGI:103038]	STAT	1690	1138	1982	1475	694	2238	27.2923	11.2708	24.8358	9.3341	8.97173	9.57254
ENSMUSG00000068798	4254.45	2017.07	2321.13	672.662	1720.38	898.525	2864.22	1097.19	1.38502	0.0109393	0.0840351	Rap1a	3	105727267	105801336	-	2607	protein_coding	RAS-related protein 1a [Source:MGI Symbol;Acc:MGI:97852]	-	2635	1907	1854	989	1264	2012	155.507	69.0203	84.8984	22.8714	59.7144	31.4492
ENSMUSG00000021448	72.6566	0	80.1254	3.40072	0	2.23292	50.9273	1.87788	4.69852	0.0111059	0.0850018	Shc3	13	51431041	51569419	-	4586	protein_coding	src homology 2 domain-containing transforming protein C3 [Source:MGI Symbol;Acc:MGI:106179]	-	45	0	64	5	0	5	1.50969	0	1.66601	0.0657314	0	0.0444282
ENSMUSG00000027852	1554.85	1181.47	2098.28	673.342	1013.99	687.738	1611.53	791.689	1.02645	0.0121155	0.0890552	Nras	3	103058285	103067914	+	5331	protein_coding	neuroblastoma ras oncogene [Source:MGI Symbol;Acc:MGI:97376]	-	963	1117	1676	990	745	1540	27.7925	19.7702	37.5315	11.196	17.2116	11.7716
ENSMUSG00000035373	287.397	20.0966	140.219	18.3639	46.276	16.5236	149.238	27.0545	2.47556	0.0125614	0.0907657	Ccl7	11	82045712	82047525	+	801	protein_coding	chemokine (C-C motif) ligand 7 [Source:MGI Symbol;Acc:MGI:99512]	-	178	19	112	27	34	37	34.1899	2.23815	16.6923	2.03221	5.22781	1.88232
ENSMUSG00000029530	64.5836	9.51946	70.1097	3.40072	13.6106	5.80558	48.0709	7.60562	2.69795	0.0136002	0.0951407	Ccr9	9	123678439	123784330	+	10260	protein_coding	chemokine (C-C motif) receptor 9 [Source:MGI Symbol;Acc:MGI:1341902]	-	40	9	56	5	10	13	0.599822	0.082768	0.651586	0.0293805	0.12004	0.051632
ENSMUSG00000052783	3.22918	39.1355	0	187.72	96.6351	116.558	14.1216	133.638	-3.22688	0.015163	0.1019	Grk4	5	34660379	34755305	+	4829	protein_coding	G protein-coupled receptor kinase 4 [Source:MGI Symbol;Acc:MGI:95801]	-	2	37	0	276	71	261	0.063721	0.722956	0	3.44579	1.81082	2.20245
ENSMUSG00000031659	101.719	94.1368	148.983	208.804	208.242	281.794	114.946	232.947	-1.02073	0.0203194	0.121092	Adcy7	8	88272403	88329962	+	6733	protein_coding	adenylate cyclase 7 [Source:MGI Symbol;Acc:MGI:102891]	-	63	89	119	307	153	631	1.4396	1.24724	2.10994	2.74895	2.7987	3.81895
ENSMUSG00000035352	237.345	17.9812	152.739	21.7646	47.637	15.6304	136.022	28.344	2.27409	0.021008	0.123112	Ccl12	11	82101845	82103400	+	537	protein_coding	chemokine (C-C motif) ligand 12 [Source:MGI Symbol;Acc:MGI:108224]	-	147	17	122	32	35	35	42.1166	2.98705	27.1217	3.59263	8.02725	2.65593
ENSMUSG00000024960	125.938	874.732	207.825	2022.07	896.937	1299.56	402.832	1406.19	-1.80243	0.0210659	0.123273	Plcb3	19	6953714	6969759	-	4201	protein_coding	phospholipase C, beta 3 [Source:MGI Symbol;Acc:MGI:104778]	-	78	827	166	2973	659	2910	2.85662	18.5746	4.71722	42.6657	19.3199	28.2269
ENSMUSG00000020580	3098.4	1201.57	1667.61	629.813	1196.37	818.587	1989.19	881.59	1.17438	0.0240731	0.133673	Rock2	12	16894895	16987823	+	13897	protein_coding	Rho-associated coiled-coil containing protein kinase 2 [Source:MGI Symbol;Acc:MGI:107926]	-	1919	1136	1332	926	879	1833	21.2453	7.71303	11.4423	4.01723	7.79006	5.37483
ENSMUSG00000015950	327.762	249.621	1398.44	208.124	257.24	155.857	658.607	207.074	1.67068	0.0246676	0.136165	Ncf1	5	134220053	134229625	-	3663	protein_coding	neutrophil cytosolic factor 1 [Source:MGI Symbol;Acc:MGI:97283]	-	203	236	1117	306	189	349	8.52647	6.07915	36.4038	5.03641	6.35474	3.8825
ENSMUSG00000003228	482.763	675.881	1133.02	225.127	499.508	255.446	763.889	326.694	1.2285	0.0256771	0.139645	Grk5	19	60889749	61092553	+	3165	protein_coding	G protein-coupled receptor kinase 5 [Source:MGI Symbol;Acc:MGI:109161]	-	299	639	905	331	367	572	14.5347	19.05	34.1355	6.30508	14.2812	7.36454
ENSMUSG00000023235	11.3021	17.9812	0	57.132	74.8582	45.5515	9.76111	59.1806	-2.5929	0.0290195	0.150502	Ccl25	8	4325210	4360020	+	7445	protein_coding	chemokine (C-C motif) ligand 25 [Source:MGI Symbol;Acc:MGI:1099448]	-	7	17	0	84	55	102	0.144658	0.215453	0	0.680223	0.909853	0.558288
ENSMUSG00000029375	8376.5	13039.5	2490.15	2675	2102.83	4155.46	7968.73	2977.76	1.41998	0.0299908	0.153969	Cxcl15	5	90794534	90803067	+	2127	protein_coding	chemokine (C-X-C motif) ligand 15 [Source:MGI Symbol;Acc:MGI:1339941]	-	5188	12328	1989	3933	1545	9305	375.269	546.881	111.634	111.479	89.4611	178.267
ENSMUSG00000004936	400.419	395.586	522.067	248.252	299.433	230.437	439.357	259.374	0.763173	0.0314972	0.158768	Map2k1	9	64185770	64253631	-	3391	protein_coding	mitogen-activated protein kinase kinase 1 [Source:MGI Symbol;Acc:MGI:1346866]	-	248	374	417	365	220	516	11.2521	10.4067	14.6804	6.48936	7.99039	6.20076
ENSMUSG00000034801	280.939	279.237	391.863	175.477	145.633	209.894	317.346	177.001	0.8387	0.0355824	0.170843	Sos2	12	69583762	69681852	-	8514	protein_coding	SOS Ras/Rho guanine nucleotide exchange factor 2 [Source:MGI Symbol;Acc:MGI:98355]	-	174	264	313	258	107	470	3.14431	2.92575	4.38876	1.82693	1.54783	2.24951
ENSMUSG00000006699	6660.19	4408.57	5747.74	2782.47	4156.67	2979.6	5605.5	3306.25	0.761852	0.0359523	0.171755	Cdc42	4	137319696	137357720	-	2966	protein_coding	cell division cycle 42 [Source:MGI Symbol;Acc:MGI:106211]	-	4125	4168	4591	4091	3054	6672	213.975	132.594	184.785	83.1563	126.815	91.6659
ENSMUSG00000009185	0	17.9812	0	19.044	127.939	60.2887	5.99373	69.0907	-3.4971	0.0368446	0.174254	Ccl8	11	82115185	82116799	+	511	protein_coding	chemokine (C-C motif) ligand 8 [Source:MGI Symbol;Acc:MGI:101878]	-	0	17	0	28	94	135	0	3.13903	0	3.3035	22.6558	10.7655
ENSMUSG00000048521	0	29.6161	27.5431	39.4483	142.911	128.169	19.0531	103.51	-2.4299	0.0437377	0.193327	Cxcr6	9	123806475	123811760	+	1931	protein_coding	chemokine (C-X-C motif) receptor 6 [Source:MGI Symbol;Acc:MGI:1934582]	-	0	28	22	58	105	287	0	1.36818	1.3601	1.81085	6.697	6.05651
ENSMUSG00000028163	1001.05	664.246	1039.13	569.28	583.894	505.085	901.473	552.753	0.705672	0.0471097	0.201409	Nfkb1	3	135584655	135691547	-	12061	protein_coding	nuclear factor of kappa light polypeptide gene enhancer in B cells 1, p105 [Source:MGI Symbol;Acc:MGI:97312]	RHD	620	628	830	837	429	1131	7.90894	4.91297	8.21535	4.18388	4.38074	3.82122
ENSMUSG00000059923	828.285	660.016	926.45	394.483	628.809	372.45	804.917	465.247	0.793137	0.0485673	0.204844	Grb2	11	115644045	115708597	-	2916	protein_coding	growth factor receptor bound protein 2 [Source:MGI Symbol;Acc:MGI:95805]	-	513	624	740	580	462	834	27.067	20.1913	30.2953	11.9916	19.5132	11.6547
T helper marker
gene_id	TERC_Sa_1	TERC_Sa_2	TERC_Sa_3	old_Sa_1	old_Sa_2	old_Sa_3	TERC_Sa	old_Sa	log2FoldChange	pvalue	padj	gene_name	gene_chr	gene_start	gene_end	gene_strand	gene_length	gene_biotype	gene_description	tf_family	TERC_Sa_1_count	TERC_Sa_2_count	TERC_Sa_3_count	old_Sa_1_count	old_Sa_2_count	old_Sa_3_count	TERC_Sa_1_fpkm	TERC_Sa_2_fpkm	TERC_Sa_3_fpkm	old_Sa_1_fpkm	old_Sa_2_fpkm	old_Sa_3_fpkm
ENSMUSG00000028965	2806.16	17.9812	2109.55	4.08086	19.0548	16.077	1644.56	13.0709	6.98319	1.60395e-08	5.79582e-06	Tnfrsf9	4	150914562	150946102	+	2722	protein_coding	tumor necrosis factor receptor superfamily, member 9 [Source:MGI Symbol;Acc:MGI:1101059]	-	1738	17	1685	6	14	36	98.2362	0.589289	73.8997	0.132892	0.633451	0.538936
ENSMUSG00000005763	0	0	0	27.2057	32.6654	28.5813	0	29.4841	-6.958	6.0015e-05	0.00269136	Cd247	1	165788681	165877277	+	5329	protein_coding	CD247 antigen [Source:MGI Symbol;Acc:MGI:88334]	-	0	0	0	40	24	64	0	0	0	0.452534	0.554675	0.489393
ENSMUSG00000048120	1546.78	316.257	758.687	106.782	168.771	192.477	873.908	156.01	2.48512	0.000162751	0.00527972	Entpd1	19	40612366	40741602	+	5580	protein_coding	ectonucleoside triphosphate diphosphohydrolase 1 [Source:MGI Symbol;Acc:MGI:102805]	-	958	299	606	157	124	431	26.4144	5.05597	12.9649	1.6963	2.73691	3.1475
ENSMUSG00000003882	8.07295	21.1543	11.2676	36.7277	137.467	150.945	13.4983	108.38	-2.98834	0.000398572	0.00986426	Il7r	15	9505788	9530176	-	4663	protein_coding	interleukin 7 receptor [Source:MGI Symbol;Acc:MGI:96562]	-	5	20	9	54	101	338	0.164974	0.404699	0.230414	0.698176	2.66765	2.95375
ENSMUSG00000026012	0	0	0	4.761	29.9433	16.5236	0	17.0759	-6.16513	0.00464945	0.0488336	Cd28	1	60716800	60773359	+	6122	protein_coding	CD28 antigen [Source:MGI Symbol;Acc:MGI:88327]	-	0	0	0	7	22	37	0	0	0	0.0689353	0.442591	0.246281
ENSMUSG00000004040	2728.66	1203.68	2481.38	1003.21	944.574	999.453	2137.91	982.413	1.12139	0.0102806	0.0809217	Stat3	11	100885098	100939540	-	9527	protein_coding	signal transducer and activator of transcription 3 [Source:MGI Symbol;Acc:MGI:103038]	STAT	1690	1138	1982	1475	694	2238	27.2923	11.2708	24.8358	9.3341	8.97173	9.57254
ENSMUSG00000028150	72.6566	60.2899	153.991	199.282	279.017	294.298	95.6458	257.532	-1.42849	0.0104485	0.0817013	Rorc	3	94372794	94398276	+	3559	protein_coding	RAR-related orphan receptor gamma [Source:MGI Symbol;Acc:MGI:104856]	THR-like	45	57	123	293	205	659	1.94534	1.51117	4.1258	4.96337	7.09413	7.54537
ENSMUSG00000005087	3615.07	839.828	2172.15	584.243	646.502	1056.17	2209.02	762.305	1.53424	0.0127776	0.0917334	Cd44	2	102811141	102901665	-	6776	protein_coding	CD44 antigen [Source:MGI Symbol;Acc:MGI:88338]	-	2239	794	1735	859	475	2365	50.8383	11.0564	30.5673	7.64287	8.63363	14.2227
ENSMUSG00000026072	587.711	216.832	811.269	253.693	232.741	223.738	538.604	236.724	1.18547	0.0392889	0.181296	Il1r1	1	40225080	40317257	+	6363	protein_coding	interleukin 1 receptor, type I [Source:MGI Symbol;Acc:MGI:96545]	-	364	205	648	373	171	501	8.80135	3.0399	12.1575	3.53414	3.30984	3.20848
TCR signaling
gene_id	TERC_Sa_1	TERC_Sa_2	TERC_Sa_3	old_Sa_1	old_Sa_2	old_Sa_3	TERC_Sa	old_Sa	log2FoldChange	pvalue	padj	gene_name	gene_chr	gene_start	gene_end	gene_strand	gene_length	gene_biotype	gene_description	tf_family	TERC_Sa_1_count	TERC_Sa_2_count	TERC_Sa_3_count	old_Sa_1_count	old_Sa_2_count	old_Sa_3_count	TERC_Sa_1_fpkm	TERC_Sa_2_fpkm	TERC_Sa_3_fpkm	old_Sa_1_fpkm	old_Sa_2_fpkm	old_Sa_3_fpkm
ENSMUSG00000021025	14214.9	888.483	8434.45	494.464	902.381	590.383	7845.93	662.409	3.56647	2.71419e-05	0.00160127	Nfkbia	12	55489410	55492647	-	1610	protein_coding	nuclear factor of kappa light polypeptide gene enhancer in B cells inhibitor, alpha [Source:MGI Symbol;Acc:MGI:104741]	-	8804	840	6737	727	663	1322	841.326	49.229	499.542	27.2236	50.7178	33.4602
ENSMUSG00000005763	0	0	0	27.2057	32.6654	28.5813	0	29.4841	-6.958	6.0015e-05	0.00269136	Cd247	1	165788681	165877277	+	5329	protein_coding	CD247 antigen [Source:MGI Symbol;Acc:MGI:88334]	-	0	0	0	40	24	64	0	0	0	0.452534	0.554675	0.489393
ENSMUSG00000022610	182.449	163.946	137.715	685.584	285.822	810.548	161.37	593.985	-1.88249	0.000359851	0.00914965	Mapk12	15	89130584	89140703	-	3805	protein_coding	mitogen-activated protein kinase 12 [Source:MGI Symbol;Acc:MGI:1353438]	-	113	155	110	1008	210	1815	4.56913	3.84366	3.45119	15.9714	6.79732	19.4377
ENSMUSG00000024235	1120.53	45.4818	475.744	20.4043	72.1361	51.8036	547.251	48.1147	3.51132	0.000466684	0.010819	Map3k8	18	4331327	4353015	-	4504	protein_coding	mitogen-activated protein kinase kinase kinase 8 [Source:MGI Symbol;Acc:MGI:1346878]	-	694	43	380	30	53	116	23.7067	0.900819	10.072	0.401568	1.44927	1.0495
ENSMUSG00000032093	95.2609	63.463	194.054	23.805	17.6938	26.3484	117.593	22.6157	2.36705	0.000500273	0.0112711	Cd3e	9	44998740	45009627	-	4080	protein_coding	CD3 antigen, epsilon polypeptide [Source:MGI Symbol;Acc:MGI:88332]	-	59	60	155	35	13	59	2.22486	1.38758	4.53526	0.517183	0.392425	0.589271
ENSMUSG00000052684	1097.92	909.637	984.04	331.23	495.425	522.502	997.199	449.719	1.14893	0.0013779	0.0221667	Jun	4	95049034	95052222	-	3189	protein_coding	jun proto-oncogene [Source:MGI Symbol;Acc:MGI:96646]	TF_bZIP	680	860	786	487	364	1170	32.8068	25.4455	29.4238	9.20685	14.0579	14.9505
ENSMUSG00000023947	419.794	35.9624	584.665	15.6433	81.6635	39.7459	346.807	45.6842	2.93199	0.00350194	0.0407945	Nfkbie	17	45555703	45563169	+	3045	protein_coding	nuclear factor of kappa light polypeptide gene enhancer in B cells inhibitor, epsilon [Source:MGI Symbol;Acc:MGI:1194908]	-	260	34	467	23	60	89	13.137	1.05356	18.3088	0.455383	2.42682	1.19104
ENSMUSG00000028191	1517.72	375.49	1011.58	218.326	390.624	236.689	968.263	281.88	1.78159	0.0037693	0.0429311	Bcl10	3	145922804	145934356	+	4564	protein_coding	B cell leukemia/lymphoma 10 [Source:MGI Symbol;Acc:MGI:1337994]	-	940	355	808	321	287	530	31.6878	7.33922	21.1347	4.24029	7.74478	4.73209
ENSMUSG00000026012	0	0	0	4.761	29.9433	16.5236	0	17.0759	-6.16513	0.00464945	0.0488336	Cd28	1	60716800	60773359	+	6122	protein_coding	CD28 antigen [Source:MGI Symbol;Acc:MGI:88327]	-	0	0	0	7	22	37	0	0	0	0.0689353	0.442591	0.246281
ENSMUSG00000033016	319.689	314.142	370.58	161.874	193.27	163.896	334.804	173.013	0.955491	0.00509235	0.0519152	Nfatc1	18	80606205	80713071	-	7433	protein_coding	nuclear factor of activated T cells, cytoplasmic, calcineurin dependent 1 [Source:MGI Symbol;Acc:MGI:102469]	RHD	198	297	296	238	142	367	4.09837	3.77016	4.75399	1.93041	2.35287	2.01199
ENSMUSG00000032688	1692.09	61.3476	769.955	116.985	179.66	143.8	841.131	146.815	2.51863	0.00790806	0.0682384	Malt1	18	65430962	65478823	+	11735	protein_coding	MALT1 paracaspase [Source:MGI Symbol;Acc:MGI:2445027]	-	1048	58	615	172	132	322	13.74	0.46635	6.25638	0.883654	1.38536	1.11814
ENSMUSG00000022092	46.8231	47.5973	40.0627	104.742	191.909	83.511	44.8277	126.721	-1.49227	0.0100516	0.0798009	Ppp3cc	14	70217865	70289471	-	2985	protein_coding	protein phosphatase 3, catalytic subunit, gamma isoform [Source:MGI Symbol;Acc:MGI:107162]	-	29	45	32	154	141	187	1.49473	1.42245	1.27978	3.11038	5.81765	2.55282
ENSMUSG00000006728	340.679	665.304	475.744	1244.66	1083.4	811.888	493.909	1046.65	-1.08189	0.0116302	0.0869947	Cdk4	10	127063534	127067920	+	3249	protein_coding	cyclin-dependent kinase 4 [Source:MGI Symbol;Acc:MGI:88357]	-	211	629	380	1830	796	1818	9.99178	18.267	13.9626	33.9577	30.1742	22.8017
ENSMUSG00000027852	1554.85	1181.47	2098.28	673.342	1013.99	687.738	1611.53	791.689	1.02645	0.0121155	0.0890552	Nras	3	103058285	103067914	+	5331	protein_coding	neuroblastoma ras oncogene [Source:MGI Symbol;Acc:MGI:97376]	-	963	1117	1676	990	745	1540	27.7925	19.7702	37.5315	11.196	17.2116	11.7716
ENSMUSG00000024401	691.045	0	492.02	2.04043	0	13.3975	394.355	5.14597	6.24119	0.0193497	0.117941	Tnf	17	35199381	35202007	-	1639	protein_coding	tumor necrosis factor [Source:MGI Symbol;Acc:MGI:104798]	-	428	0	393	3	0	30	40.1767	0	28.6249	0.110352	0	0.745874
ENSMUSG00000030742	75.8858	71.9248	0	449.575	186.465	280.901	49.2702	305.647	-2.63439	0.0312134	0.158044	Lat	7	126363824	126369570	-	2767	protein_coding	linker for activation of T cells [Source:MGI Symbol;Acc:MGI:1342293]	-	47	68	0	661	137	629	2.61336	2.31882	0	14.4022	6.09796	9.26328
ENSMUSG00000004936	400.419	395.586	522.067	248.252	299.433	230.437	439.357	259.374	0.763173	0.0314972	0.158768	Map2k1	9	64185770	64253631	-	3391	protein_coding	mitogen-activated protein kinase kinase 1 [Source:MGI Symbol;Acc:MGI:1346866]	-	248	374	417	365	220	516	11.2521	10.4067	14.6804	6.48936	7.99039	6.20076
ENSMUSG00000033953	1491.88	607.13	1355.87	572	630.17	537.239	1151.63	579.803	0.989911	0.034465	0.16812	Ppp3r1	11	17159263	17200375	+	3228	protein_coding	protein phosphatase 3, regulatory subunit B, alpha isoform (calcineurin B, type I) [Source:MGI Symbol;Acc:MGI:107172]	-	924	574	1083	841	463	1203	44.0401	16.7782	40.0522	15.7072	17.6653	15.1864
ENSMUSG00000034801	280.939	279.237	391.863	175.477	145.633	209.894	317.346	177.001	0.8387	0.0355824	0.170843	Sos2	12	69583762	69681852	-	8514	protein_coding	SOS Ras/Rho guanine nucleotide exchange factor 2 [Source:MGI Symbol;Acc:MGI:98355]	-	174	264	313	258	107	470	3.14431	2.92575	4.38876	1.82693	1.54783	2.24951
ENSMUSG00000006699	6660.19	4408.57	5747.74	2782.47	4156.67	2979.6	5605.5	3306.25	0.761852	0.0359523	0.171755	Cdc42	4	137319696	137357720	-	2966	protein_coding	cell division cycle 42 [Source:MGI Symbol;Acc:MGI:106211]	-	4125	4168	4591	4091	3054	6672	213.975	132.594	184.785	83.1563	126.815	91.6659
ENSMUSG00000028163	1001.05	664.246	1039.13	569.28	583.894	505.085	901.473	552.753	0.705672	0.0471097	0.201409	Nfkb1	3	135584655	135691547	-	12061	protein_coding	nuclear factor of kappa light polypeptide gene enhancer in B cells 1, p105 [Source:MGI Symbol;Acc:MGI:97312]	RHD	620	628	830	837	429	1131	7.90894	4.91297	8.21535	4.18388	4.38074	3.82122
ENSMUSG00000059923	828.285	660.016	926.45	394.483	628.809	372.45	804.917	465.247	0.793137	0.0485673	0.204844	Grb2	11	115644045	115708597	-	2916	protein_coding	growth factor receptor bound protein 2 [Source:MGI Symbol;Acc:MGI:95805]	-	513	624	740	580	462	834	27.067	20.1913	30.2953	11.9916	19.5132	11.6547
Myeloid supressor cells
gene_id	TERC_Sa_1	TERC_Sa_2	TERC_Sa_3	old_Sa_1	old_Sa_2	old_Sa_3	TERC_Sa	old_Sa	log2FoldChange	pvalue	padj	gene_name	gene_chr	gene_start	gene_end	gene_strand	gene_length	gene_biotype	gene_description	tf_family	TERC_Sa_1_count	TERC_Sa_2_count	TERC_Sa_3_count	old_Sa_1_count	old_Sa_2_count	old_Sa_3_count	TERC_Sa_1_fpkm	TERC_Sa_2_fpkm	TERC_Sa_3_fpkm	old_Sa_1_fpkm	old_Sa_2_fpkm	old_Sa_3_fpkm
ENSMUSG00000079018	3548.87	1961.01	2680.44	940.638	1083.4	973.551	2730.11	999.197	1.45013	8.85631e-05	0.00349939	Ly6c1	15	75044018	75048830	-	1677	protein_coding	lymphocyte antigen 6 complex, locus C1 [Source:MGI Symbol;Acc:MGI:96882]	-	2198	1854	2141	1383	796	2180	201.653	104.314	152.41	49.7194	58.4592	52.972
ENSMUSG00000022582	25.8335	9.51946	46.3225	1.36029	0	2.23292	27.2251	1.19773	4.33745	0.00158309	0.0242827	Ly6g	15	75155240	75159126	+	942	protein_coding	lymphocyte antigen 6 complex, locus G [Source:MGI Symbol;Acc:MGI:109440]	-	16	9	37	2	0	5	2.61324	0.901486	4.68902	0.128002	0	0.216293
ENSMUSG00000030786	169.532	59.2322	381.848	23.805	25.8601	58.949	203.537	36.2047	2.48175	0.0027736	0.0353605	Itgam	7	128062640	128118491	+	5024	protein_coding	integrin alpha M [Source:MGI Symbol;Acc:MGI:96607]	-	105	56	305	35	19	132	3.21551	1.05173	7.24738	0.420006	0.465776	1.07065

## Sheet: Terc_Sa vs Terc_mock
Supplemental Table 3g. DEG of Tercko/ko S. aureus mice vs. Tercko/ko mock mice. All genes belonging to the respective pathways with a p value <0.05 are listed.
NLRP3 inflammasome signaling
gene_id	TERC_Sa_1	TERC_Sa_2	TERC_Sa_3	TERC_mock_1	TERC_mock_2	TERC_mock_3	TERC_Sa	TERC_mock	log2FoldChange	pvalue	padj	gene_name	gene_chr	gene_start	gene_end	gene_strand	gene_length	gene_biotype	gene_description	tf_family	TERC_Sa_1_count	TERC_Sa_2_count	TERC_Sa_3_count	TERC_mock_1_count	TERC_mock_2_count	TERC_mock_3_count	TERC_Sa_1_fpkm	TERC_Sa_2_fpkm	TERC_Sa_3_fpkm	TERC_mock_1_fpkm	TERC_mock_2_fpkm	TERC_mock_3_fpkm
ENSMUSG00000019850	4843.54	105.108	2293.91	74.131	168.238	81.017	2414.19	107.795	4.48589	3.04633e-07	0.000247612	Tnfaip3	10	19000910	19015657	-	7226	protein_coding	tumor necrosis factor, alpha-induced protein 3 [Source:MGI Symbol;Acc:MGI:1196377]	-	3172	108	1939	202	169	61	67.5375	1.41024	32.034	1.01536	2.26035	1.09032
ENSMUSG00000021025	13443.4	817.507	7970.13	658.738	852.14	792.904	7410.35	767.927	3.27058	4.2791e-06	0.00191731	Nfkbia	12	55489410	55492647	-	1610	protein_coding	nuclear factor of kappa light polypeptide gene enhancer in B cells inhibitor, alpha [Source:MGI Symbol;Acc:MGI:104741]	-	8804	840	6737	1795	856	597	841.326	49.229	499.542	40.4955	51.3847	47.8927
ENSMUSG00000032691	361.891	9.73222	430.626	8.80764	12.9414	0	267.416	7.24967	5.17841	2.07378e-05	0.00570513	Nlrp3	11	59541568	59566956	+	4057	protein_coding	NLR family, pyrin domain containing 3 [Source:MGI Symbol;Acc:MGI:2653833]	-	237	10	364	24	13	0	8.9878	0.232575	10.7109	0.21487	0.309688	0
ENSMUSG00000046879	1268.91	745.488	897.926	269.367	255.841	374.537	970.774	299.915	1.69585	4.10767e-05	0.00970486	Irgm1	11	48861968	48871683	-	5810	protein_coding	immunity-related GTPase family M member 1 [Source:MGI Symbol;Acc:MGI:107567]	-	831	766	759	734	257	282	22.0057	12.44	15.5954	4.58869	4.27507	6.26894
ENSMUSG00000028268	1840	781.497	970.091	372.123	282.719	332.037	1197.19	328.96	1.86219	4.12465e-05	0.00970486	Gbp3	3	142560026	142573209	+	3265	protein_coding	guanylate binding protein 3 [Source:MGI Symbol;Acc:MGI:1926263]	-	1205	803	820	1014	284	250	56.7824	23.206	29.9821	11.2804	8.40662	9.88958
ENSMUSG00000035385	1024.59	21.4109	106.473	11.7435	24.8873	0	384.16	12.2103	4.96491	8.33417e-05	0.0158544	Ccl2	11	82035571	82037453	+	1138	protein_coding	chemokine (C-C motif) ligand 2 [Source:MGI Symbol;Acc:MGI:98259]	-	671	22	90	32	25	0	90.7173	1.8241	9.44129	1.02135	2.12317	0
ENSMUSG00000027398	3829.63	62.2862	3759.69	19.0832	100.545	61.0948	2550.54	60.2408	5.40638	8.82679e-05	0.0161062	Il1b	2	129364570	129371139	-	1907	protein_coding	interleukin 1 beta [Source:MGI Symbol;Acc:MGI:96543]	-	2508	64	3178	52	101	46	202.342	3.16663	198.946	0.990424	5.11867	3.1155
ENSMUSG00000105504	1592.63	160.582	443.639	58.3506	124.436	107.58	732.282	96.7889	2.92203	0.000110483	0.0185404	Gbp5	3	142493978	142522344	+	6637	protein_coding	guanylate binding protein 5 [Source:MGI Symbol;Acc:MGI:2429943]	-	1043	165	375	159	125	81	24.1781	2.34574	6.74513	0.87015	1.82022	1.57628
ENSMUSG00000032000	3040.19	215.082	2175.61	290.652	287.697	208.519	1810.29	262.289	2.78603	0.00011554	0.0188775	Birc3	9	7848699	7873186	-	5009	protein_coding	baculoviral IAP repeat-containing 3 [Source:MGI Symbol;Acc:MGI:1197007]	-	1991	221	1839	792	289	157	61.1547	4.16302	43.829	5.74305	5.57613	4.04827
ENSMUSG00000028270	1832.36	1006.31	1083.66	350.838	523.628	418.366	1307.44	430.944	1.60159	0.00012084	0.0192935	Gbp2	3	142620602	142638008	+	2516	protein_coding	guanylate binding protein 2 [Source:MGI Symbol;Acc:MGI:102772]	-	1200	1034	916	956	526	315	73.3805	38.7773	43.4626	13.8012	20.2051	16.1704
ENSMUSG00000058427	21598.9	0	8546.27	1.46794	0	0	10048.4	0.489313	14.1947	0.000130159	0.0200647	Cxcl2	5	90903871	90905938	+	2068	protein_coding	chemokine (C-X-C motif) ligand 2 [Source:MGI Symbol;Acc:MGI:1340094]	-	14145	0	7224	4	0	0	1052.36	0	417.021	0.0702551	0	0
ENSMUSG00000032508	1412.44	333.815	1520.2	289.184	163.26	251.02	1088.82	234.488	2.21374	0.000187618	0.0241366	Myd88	9	119335934	119341411	-	2576	protein_coding	myeloid differentiation primary response gene 88 [Source:MGI Symbol;Acc:MGI:108005]	-	925	343	1285	788	164	189	55.2466	12.5636	59.5509	11.1109	6.15296	9.47626
ENSMUSG00000029380	4591.59	0	815.113	3.66985	3.98196	0	1802.23	2.5506	9.44527	0.000713876	0.0562359	Cxcl1	5	90891241	90893115	+	1875	protein_coding	chemokine (C-X-C motif) ligand 1 [Source:MGI Symbol;Acc:MGI:108068]	-	3007	0	689	10	4	0	246.741	0	43.8681	0.193717	0.206179	0
ENSMUSG00000038357	641.326	0	331.251	0.366985	0	0	324.192	0.122328	10.2714	0.00122171	0.0760007	Camp	9	109847379	109849617	-	758	protein_coding	cathelicidin antimicrobial peptide [Source:MGI Symbol;Acc:MGI:108443]	-	420	0	280	1	0	0	85.2491	0	44.0981	0.0479181	0	0
ENSMUSG00000007659	3127.23	1150.35	2790.79	948.656	942.729	747.747	2356.12	879.711	1.42064	0.00168461	0.0878256	Bcl2l1	2	152780668	152831728	-	4586	protein_coding	BCL2-like 1 [Source:MGI Symbol;Acc:MGI:88139]	-	2048	1182	2359	2585	947	563	68.7078	24.3193	61.408	20.4736	19.9573	15.8561
ENSMUSG00000027164	1221.57	147.93	669.599	161.473	224.981	128.83	679.701	171.761	1.98322	0.00408174	0.141402	Traf6	2	101678429	101701669	+	7883	protein_coding	TNF receptor-associated factor 6 [Source:MGI Symbol;Acc:MGI:108072]	-	800	152	566	440	226	97	15.6138	1.81936	8.57148	2.02736	2.77079	1.58928
ENSMUSG00000029379	4802.31	0	1452.77	4.40382	0	0	2085.03	1.46794	10.4217	0.00452784	0.14802	Cxcl3	5	90786103	90789600	+	3498	protein_coding	chemokine (C-X-C motif) ligand 3 [Source:MGI Symbol;Acc:MGI:3037818]	-	3145	0	1228	12	0	0	138.328	0	41.9092	0.124603	0	0
ENSMUSG00000033538	626.056	108.028	514.621	117.802	64.7069	176.644	416.235	119.718	1.79853	0.0115993	0.232774	Casp4	9	5308828	5336783	+	3710	protein_coding	caspase 4, apoptosis-related cysteine peptidase [Source:MGI Symbol;Acc:MGI:107700]	-	410	111	435	321	65	133	17.0028	2.82304	13.9974	3.14268	1.69327	4.63019
ENSMUSG00000035352	224.464	16.5448	144.331	17.9823	25.8827	0	128.447	14.6217	3.12064	0.0138929	0.256045	Ccl12	11	82101845	82103400	+	537	protein_coding	chemokine (C-C motif) ligand 12 [Source:MGI Symbol;Acc:MGI:108224]	-	147	17	122	49	26	0	42.1166	2.98705	27.1217	3.31429	4.67935	0
ENSMUSG00000038393	10061.2	2742.54	5447.89	2093.65	3309.01	2447.78	6083.87	2616.81	1.21713	0.0140735	0.256595	Txnip	3	96557957	96561883	+	3123	protein_coding	thioredoxin interacting protein [Source:MGI Symbol;Acc:MGI:1889549]	-	6589	2818	4605	5705	3324	1843	324.607	85.1406	176.031	66.3517	102.867	76.2209
ENSMUSG00000021771	2904.29	1605.82	2896.08	1364.08	1452.42	1078.46	2468.73	1298.32	0.926571	0.0160181	0.271503	Vdac2	14	21825238	21845879	+	4769	protein_coding	voltage-dependent anion channel 2 [Source:MGI Symbol;Acc:MGI:106915]	-	1902	1650	2448	3717	1459	812	61.3611	32.6456	61.2795	28.3096	29.5675	21.9912
ENSMUSG00000057367	2165.24	436.977	624.644	365.15	480.822	314.771	1075.62	386.914	1.47418	0.0163966	0.275567	Birc2	9	7818227	7837064	-	4580	protein_coding	baculoviral IAP repeat-containing 2 [Source:MGI Symbol;Acc:MGI:1197009]	-	1418	449	528	995	483	237	47.6344	9.25014	13.7626	7.8909	10.1922	6.6835
ENSMUSG00000027466	230.572	545.978	322.969	861.681	847.162	645.479	366.506	784.774	-1.09698	0.0174893	0.281168	Rbck1	2	152316334	152332653	-	4601	protein_coding	RanBP-type and C3HC4-type zinc finger containing 1 [Source:MGI Symbol;Acc:MGI:1344372]	-	151	561	273	2348	851	486	5.04934	11.5048	7.08339	18.5359	17.8757	13.6428
ENSMUSG00000030595	451.982	102.188	337.166	87.7094	104.526	127.502	297.112	106.579	1.47999	0.0229592	0.315812	Nfkbib	7	28758251	28767512	-	2169	protein_coding	nuclear factor of kappa light polypeptide gene enhancer in B cells inhibitor, beta [Source:MGI Symbol;Acc:MGI:104752]	-	296	105	285	239	105	96	20.9963	4.5677	15.6861	4.00228	4.6786	5.71653
ENSMUSG00000020572	1878.17	713.372	1382.97	500.567	766.527	670.714	1324.84	645.936	1.03653	0.0247974	0.326697	Nampt	12	32819545	32853349	+	5054	protein_coding	nicotinamide phosphoribosyltransferase [Source:MGI Symbol;Acc:MGI:1929865]	-	1230	733	1169	1364	770	505	37.4438	13.6847	27.6128	9.80275	14.7245	12.9056
ENSMUSG00000064289	575.667	153.769	309.956	162.574	145.342	104.924	346.464	137.613	1.32777	0.0289884	0.348604	Tank	2	61578585	61654171	+	6096	protein_coding	TRAF family member-associated Nf-kappa B activator [Source:MGI Symbol;Acc:MGI:107676]	-	377	158	262	443	146	79	9.51495	2.44557	5.13083	2.63954	2.3147	1.6738
ENSMUSG00000039943	948.246	399.994	734.667	385.334	355.39	296.177	694.302	345.634	1.00427	0.0296452	0.35076	Plcb4	2	135659011	136014593	+	8970	protein_coding	phospholipase C, beta 4 [Source:MGI Symbol;Acc:MGI:107464]	-	621	411	621	1050	357	223	10.6515	4.32331	8.26476	4.25173	3.84647	3.21095
ENSMUSG00000021408	522.223	154.742	451.92	172.85	123.441	193.909	376.295	163.4	1.20242	0.0406474	0.395892	Ripk1	13	34002363	34037147	+	8344	protein_coding	receptor (TNFRSF)-interacting serine-threonine kinase 1 [Source:MGI Symbol;Acc:MGI:108212]	-	342	159	382	471	124	146	6.30611	1.798	5.46538	2.05029	1.43626	2.25995
ENSMUSG00000028530	2264.49	946.945	1688.2	793.054	984.54	954.938	1633.21	910.844	0.842329	0.0473016	0.421658	Jak1	4	101152367	101265282	-	7227	protein_coding	Janus kinase 1 [Source:MGI Symbol;Acc:MGI:96628]	-	1483	973	1427	2161	989	719	31.5713	12.7035	23.572	10.8609	13.2259	12.8497
ENSMUSG00000021709	3163.88	1235.02	2738.73	1158.2	1357.85	1427.76	2379.21	1314.6	0.855812	0.0486366	0.426248	Erbin	13	103818787	103920514	-	7939	protein_coding	Erbb2 interacting protein [Source:MGI Symbol;Acc:MGI:1890169]	-	2072	1269	2315	3156	1364	1075	40.1545	15.0822	34.811	14.4391	16.6048	17.4889
Macrophage marker
gene_id	TERC_Sa_1	TERC_Sa_2	TERC_Sa_3	TERC_mock_1	TERC_mock_2	TERC_mock_3	TERC_Sa	TERC_mock	log2FoldChange	pvalue	padj	gene_name	gene_chr	gene_start	gene_end	gene_strand	gene_length	gene_biotype	gene_description	tf_family	TERC_Sa_1_count	TERC_Sa_2_count	TERC_Sa_3_count	TERC_mock_1_count	TERC_mock_2_count	TERC_mock_3_count	TERC_Sa_1_fpkm	TERC_Sa_2_fpkm	TERC_Sa_3_fpkm	TERC_mock_1_fpkm	TERC_mock_2_fpkm	TERC_mock_3_fpkm
ENSMUSG00000051439	10555.9	200.484	4669.45	209.548	164.256	304.146	5141.95	225.983	4.50856	1.66512e-07	0.000156714	Cd14	18	36725074	36726736	-	1572	protein_coding	CD14 antigen [Source:MGI Symbol;Acc:MGI:88318]	-	6913	206	3947	571	165	229	676.587	12.3647	299.741	13.1933	10.1442	18.815
ENSMUSG00000035385	1024.59	21.4109	106.473	11.7435	24.8873	0	384.16	12.2103	4.96491	8.33417e-05	0.0158544	Ccl2	11	82035571	82037453	+	1138	protein_coding	chemokine (C-C motif) ligand 2 [Source:MGI Symbol;Acc:MGI:98259]	-	671	22	90	32	25	0	90.7173	1.8241	9.44129	1.02135	2.12317	0
ENSMUSG00000027398	3829.63	62.2862	3759.69	19.0832	100.545	61.0948	2550.54	60.2408	5.40638	8.82679e-05	0.0161062	Il1b	2	129364570	129371139	-	1907	protein_coding	interleukin 1 beta [Source:MGI Symbol;Acc:MGI:96543]	-	2508	64	3178	52	101	46	202.342	3.16663	198.946	0.990424	5.11867	3.1155
ENSMUSG00000031779	729.89	112.894	918.037	20.1842	95.5671	92.9703	586.94	69.5738	3.08443	0.000127698	0.0198566	Ccl22	8	94745590	94751699	+	2325	protein_coding	chemokine (C-C motif) ligand 22 [Source:MGI Symbol;Acc:MGI:1306779]	-	478	116	776	55	96	70	31.6311	4.70763	39.8446	0.859228	3.99057	3.88862
ENSMUSG00000058427	21598.9	0	8546.27	1.46794	0	0	10048.4	0.489313	14.1947	0.000130159	0.0200647	Cxcl2	5	90903871	90905938	+	2068	protein_coding	chemokine (C-X-C motif) ligand 2 [Source:MGI Symbol;Acc:MGI:1340094]	-	14145	0	7224	4	0	0	1052.36	0	417.021	0.0702551	0	0
ENSMUSG00000027995	694.77	20.4377	567.858	63.8554	48.779	26.5629	427.689	46.3991	3.19763	0.000699443	0.0555886	Tlr2	3	83836272	83841767	-	3014	protein_coding	toll-like receptor 2 [Source:MGI Symbol;Acc:MGI:1346060]	-	455	21	480	174	49	20	23.2262	0.657421	19.0121	2.09689	1.57123	0.857053
ENSMUSG00000014599	760.43	129.439	432.992	207.713	73.6663	23.9066	440.953	101.762	2.10613	0.0117721	0.235206	Csf1	3	107741048	107760469	-	5281	protein_coding	colony stimulating factor 1 (macrophage) [Source:MGI Symbol;Acc:MGI:1339753]	-	498	133	366	566	74	18	14.5085	2.37631	8.27363	3.89286	1.35426	0.440228
ENSMUSG00000026072	555.816	199.511	766.609	243.678	216.021	173.987	507.312	211.229	1.26192	0.0274051	0.339846	Il1r1	1	40225080	40317257	+	6363	protein_coding	interleukin 1 receptor, type I [Source:MGI Symbol;Acc:MGI:96545]	-	364	205	648	664	217	131	8.80135	3.0399	12.1575	3.79031	3.29598	2.65907
ENSMUSG00000022667	51.9169	27.2502	170.357	23.1201	7.96392	22.5785	83.1748	17.8875	2.2134	0.0300695	0.352572	Cd200r1	16	44765736	44794978	+	3348	protein_coding	CD200 receptor 1 [Source:MGI Symbol;Acc:MGI:1889024]	-	34	28	144	63	8	17	1.56244	0.789115	5.13462	0.683477	0.230935	0.655819
ENSMUSG00000025351	4918.36	2001.92	3728.94	2488.52	1695.32	1148.85	3549.74	1777.56	0.996976	0.0322081	0.361597	Cd63	10	128900989	128912822	+	3682	protein_coding	CD63 antigen [Source:MGI Symbol;Acc:MGI:99529]	-	3221	2057	3152	6781	1703	865	134.591	52.713	102.196	66.8927	44.701	30.3426
ENSMUSG00000050335	1649.12	835.998	2053.75	1050.31	689.875	650.792	1512.96	796.993	0.923422	0.043198	0.405494	Lgals3	14	47367751	47386160	+	1858	protein_coding	lectin, galactose binding, soluble 3 [Source:MGI Symbol;Acc:MGI:96778]	-	1080	859	1736	2862	693	490	89.431	43.6229	111.541	55.949	36.0474	34.0621
ENSMUSG00000075122	109.942	9.73222	164.442	12.8445	17.9188	33.2037	94.7054	21.3223	2.16129	0.0444507	0.409093	Cd80	16	38455561	38496335	+	3703	protein_coding	CD80 antigen [Source:MGI Symbol;Acc:MGI:101775]	-	72	10	139	35	18	25	2.9915	0.254808	4.48118	0.343307	0.469791	0.871981
Chemokine signaling
gene_id	TERC_Sa_1	TERC_Sa_2	TERC_Sa_3	TERC_mock_1	TERC_mock_2	TERC_mock_3	TERC_Sa	TERC_mock	log2FoldChange	pvalue	padj	gene_name	gene_chr	gene_start	gene_end	gene_strand	gene_length	gene_biotype	gene_description	tf_family	TERC_Sa_1_count	TERC_Sa_2_count	TERC_Sa_3_count	TERC_mock_1_count	TERC_mock_2_count	TERC_mock_3_count	TERC_Sa_1_fpkm	TERC_Sa_2_fpkm	TERC_Sa_3_fpkm	TERC_mock_1_fpkm	TERC_mock_2_fpkm	TERC_mock_3_fpkm
ENSMUSG00000029417	517.642	7.78578	236.608	2.56889	0	0	254.012	0.856298	7.84874	3.50476e-08	4.82094e-05	Cxcl9	5	92321347	92328079	-	3016	protein_coding	chemokine (C-X-C motif) ligand 9 [Source:MGI Symbol;Acc:MGI:1352449]	-	339	8	200	7	0	0	17.2933	0.25028	7.91644	0.0843015	0	0
ENSMUSG00000026166	1575.83	11.6787	269.733	1.10095	0	0	619.08	0.366985	10.3006	3.33495e-06	0.00161177	Ccl20	1	83116766	83119167	+	1421	protein_coding	chemokine (C-C motif) ligand 20 [Source:MGI Symbol;Acc:MGI:1329031]	-	1032	12	228	3	0	0	111.737	0.79681	19.1545	0.0766824	0	0
ENSMUSG00000021025	13443.4	817.507	7970.13	658.738	852.14	792.904	7410.35	767.927	3.27058	4.2791e-06	0.00191731	Nfkbia	12	55489410	55492647	-	1610	protein_coding	nuclear factor of kappa light polypeptide gene enhancer in B cells inhibitor, alpha [Source:MGI Symbol;Acc:MGI:104741]	-	8804	840	6737	1795	856	597	841.326	49.229	499.542	40.4955	51.3847	47.8927
ENSMUSG00000000982	4406.83	7.78578	2847.57	17.6153	10.9504	17.2659	2420.73	15.2772	7.30692	5.88618e-06	0.00233904	Ccl3	11	83647844	83649355	-	766	protein_coding	chemokine (C-C motif) ligand 3 [Source:MGI Symbol;Acc:MGI:98260]	-	2886	8	2407	48	11	13	579.666	0.985437	375.127	2.27605	1.38787	2.19197
ENSMUSG00000025804	444.347	15.5716	700.358	26.4229	7.96392	0	386.759	11.4623	5.03347	3.34419e-05	0.0080812	Ccr1	9	123962124	123968692	-	2833	protein_coding	chemokine (C-C motif) receptor 1 [Source:MGI Symbol;Acc:MGI:104618]	-	291	16	592	72	8	0	15.8036	0.532894	24.9463	0.923112	0.272916	0
ENSMUSG00000035385	1024.59	21.4109	106.473	11.7435	24.8873	0	384.16	12.2103	4.96491	8.33417e-05	0.0158544	Ccl2	11	82035571	82037453	+	1138	protein_coding	chemokine (C-C motif) ligand 2 [Source:MGI Symbol;Acc:MGI:98259]	-	671	22	90	32	25	0	90.7173	1.8241	9.44129	1.02135	2.12317	0
ENSMUSG00000031779	729.89	112.894	918.037	20.1842	95.5671	92.9703	586.94	69.5738	3.08443	0.000127698	0.0198566	Ccl22	8	94745590	94751699	+	2325	protein_coding	chemokine (C-C motif) ligand 22 [Source:MGI Symbol;Acc:MGI:1306779]	-	478	116	776	55	96	70	31.6311	4.70763	39.8446	0.859228	3.99057	3.88862
ENSMUSG00000058427	21598.9	0	8546.27	1.46794	0	0	10048.4	0.489313	14.1947	0.000130159	0.0200647	Cxcl2	5	90903871	90905938	+	2068	protein_coding	chemokine (C-X-C motif) ligand 2 [Source:MGI Symbol;Acc:MGI:1340094]	-	14145	0	7224	4	0	0	1052.36	0	417.021	0.0702551	0	0
ENSMUSG00000029380	4591.59	0	815.113	3.66985	3.98196	0	1802.23	2.5506	9.44527	0.000713876	0.0562359	Cxcl1	5	90891241	90893115	+	1875	protein_coding	chemokine (C-X-C motif) ligand 1 [Source:MGI Symbol;Acc:MGI:108068]	-	3007	0	689	10	4	0	246.741	0	43.8681	0.193717	0.206179	0
ENSMUSG00000031780	555.816	50.6076	345.447	34.4966	75.6573	17.2659	317.29	42.4733	2.8985	0.000944514	0.0659758	Ccl17	8	94810453	94812036	+	514	protein_coding	chemokine (C-C motif) ligand 17 [Source:MGI Symbol;Acc:MGI:1329039]	-	364	52	292	94	76	13	108.955	9.5457	67.8189	6.64253	14.2901	3.26664
ENSMUSG00000052681	9070.18	2629.65	7456.69	1656.2	2578.32	2358.79	6385.51	2197.77	1.53887	0.00162866	0.0867669	Rap1b	10	117813871	117846035	-	2884	protein_coding	RAS related protein 1b [Source:MGI Symbol;Acc:MGI:894315]	-	5940	2702	6303	4513	2590	1776	316.885	88.4011	260.905	56.838	86.7942	79.5369
ENSMUSG00000018920	1592.63	516.781	1750.9	504.237	441.998	207.191	1286.77	384.475	1.74055	0.00203267	0.0982386	Cxcl16	11	70453983	70459984	-	3021	protein_coding	chemokine (C-X-C motif) ligand 16 [Source:MGI Symbol;Acc:MGI:1932682]	-	1043	531	1480	1374	444	156	53.1182	16.5848	58.4847	16.5198	14.2043	6.66952
ENSMUSG00000060183	119.103	3.89289	0	0.366985	0	0	40.9988	0.122328	7.2774	0.00285696	0.119925	Cxcl11	5	92359544	92365485	-	3794	polymorphic_pseudogene	chemokine (C-X-C motif) ligand 11 [Source:MGI Symbol;Acc:MGI:1860203]	-	78	4	0	1	0	0	3.16306	0.0994787	0	0.00957351	0	0
ENSMUSG00000018930	1213.94	14.5983	456.653	15.4134	25.8827	0	561.73	13.7654	5.345	0.00417833	0.143411	Ccl4	11	83662584	83664683	+	660	protein_coding	chemokine (C-C motif) ligand 4 [Source:MGI Symbol;Acc:MGI:98261]	-	795	15	386	42	26	0	185.325	2.14444	69.8191	2.31139	3.80729	0
ENSMUSG00000029379	4802.31	0	1452.77	4.40382	0	0	2085.03	1.46794	10.4217	0.00452784	0.14802	Cxcl3	5	90786103	90789600	+	3498	protein_coding	chemokine (C-X-C motif) ligand 3 [Source:MGI Symbol;Acc:MGI:3037818]	-	3145	0	1228	12	0	0	138.328	0	41.9092	0.124603	0	0
ENSMUSG00000023078	134.373	7.78578	215.313	14.3124	14.9324	13.2815	119.157	14.1754	3.06919	0.00460124	0.149599	Cxcl13	5	95956951	95961068	+	1150	protein_coding	chemokine (C-X-C motif) ligand 13 [Source:MGI Symbol;Acc:MGI:1888499]	-	88	8	182	39	15	10	11.7732	0.656386	18.8932	1.23179	1.26061	1.12311
ENSMUSG00000061353	206.141	759.113	244.889	1152.7	936.756	1389.24	403.381	1159.57	-1.52139	0.00660937	0.173044	Cxcl12	6	117168535	117181367	+	8176	protein_coding	chemokine (C-X-C motif) ligand 12 [Source:MGI Symbol;Acc:MGI:103556]	-	135	780	207	3141	941	1046	2.5404	9.00163	3.02246	13.9539	11.1233	16.5239
ENSMUSG00000023235	10.6888	16.5448	0	42.5703	110.499	107.58	9.07785	86.8832	-3.25084	0.00722082	0.181098	Ccl25	8	4325210	4360020	+	7445	protein_coding	chemokine (C-C motif) ligand 25 [Source:MGI Symbol;Acc:MGI:1099448]	-	7	17	0	116	111	81	0.144658	0.215453	0	0.565929	1.44094	1.40521
ENSMUSG00000004040	2580.57	1107.53	2344.78	998.933	927.797	852.67	2010.96	926.467	1.11741	0.00805997	0.192977	Stat3	11	100885098	100939540	-	9527	protein_coding	signal transducer and activator of transcription 3 [Source:MGI Symbol;Acc:MGI:103038]	STAT	1690	1138	1982	2722	932	642	27.2923	11.2708	24.8358	10.3777	9.45466	8.70362
ENSMUSG00000019122	690.189	107.054	528.818	108.628	61.7204	189.925	442.02	120.091	1.88158	0.0101952	0.218229	Ccl9	11	83572919	83578636	-	3045	protein_coding	chemokine (C-C motif) ligand 9 [Source:MGI Symbol;Acc:MGI:104533]	-	452	110	447	296	62	143	22.8382	3.40858	17.5247	3.5308	1.96784	6.06554
ENSMUSG00000035373	271.8	18.4912	132.5	17.2483	11.9459	42.5007	140.931	23.8983	2.56923	0.0113435	0.229983	Ccl7	11	82045712	82047525	+	801	protein_coding	chemokine (C-C motif) ligand 7 [Source:MGI Symbol;Acc:MGI:99512]	-	178	19	112	47	12	32	34.1899	2.23815	16.6923	2.13125	1.44789	5.15986
ENSMUSG00000028698	12.2157	123.599	29.5759	199.273	182.175	342.662	55.1303	241.37	-2.1207	0.012441	0.242536	Pik3r3	4	116221618	116303056	+	5300	protein_coding	phosphoinositide-3-kinase regulatory subunit 3 [Source:MGI Symbol;Acc:MGI:109277]	-	8	127	25	543	183	258	0.232233	2.26097	0.563113	3.72128	3.33704	6.28731
ENSMUSG00000036402	2714.95	839.891	2518.69	597.452	957.662	973.532	2024.51	842.882	1.26458	0.012461	0.242536	Gng12	6	66896397	67021350	+	4727	protein_coding	guanine nucleotide binding protein (G protein), gamma 12 [Source:MGI Symbol;Acc:MGI:1336171]	-	1778	863	2129	1628	962	733	57.8703	17.2263	53.7677	12.5094	19.6687	20.0281
ENSMUSG00000035352	224.464	16.5448	144.331	17.9823	25.8827	0	128.447	14.6217	3.12064	0.0138929	0.256045	Ccl12	11	82101845	82103400	+	537	protein_coding	chemokine (C-C motif) ligand 12 [Source:MGI Symbol;Acc:MGI:108224]	-	147	17	122	49	26	0	42.1166	2.98705	27.1217	3.31429	4.67935	0
ENSMUSG00000028874	94.6719	85.6436	430.626	61.6535	48.779	50.4696	203.647	53.634	1.9229	0.0145435	0.258773	Fgr	4	132974095	133001910	+	3863	protein_coding	FGR proto-oncogene, Src family tyrosine kinase [Source:MGI Symbol;Acc:MGI:95527]	-	62	88	364	168	49	38	2.46932	2.14944	11.2488	1.57962	1.22591	1.27051
ENSMUSG00000022220	114.523	139.171	40.2233	953.427	120.454	127.502	97.9722	400.461	-2.03341	0.0185142	0.287037	Adcy4	14	55769057	55784095	-	4672	protein_coding	adenylate cyclase 4 [Source:MGI Symbol;Acc:MGI:99674]	-	75	143	34	2598	121	96	2.46984	2.88802	0.868775	20.1978	2.50305	2.65393
ENSMUSG00000000001	1780.44	881.739	1752.08	534.697	823.27	836.733	1471.42	731.567	1.00883	0.0197478	0.297387	Gnai3	3	108107280	108146146	-	3262	protein_coding	guanine nucleotide binding protein (G protein), alpha inhibiting 3 [Source:MGI Symbol;Acc:MGI:95773]	-	1166	906	1481	1457	827	630	54.9952	26.2067	54.2004	16.2235	24.5023	24.9447
ENSMUSG00000074715	0	0	0	15.4134	18.9143	9.29703	0	14.5416	-6.03471	0.0219239	0.31164	Ccl28	13	119623819	119654359	+	4844	protein_coding	chemokine (C-C motif) ligand 28 [Source:MGI Symbol;Acc:MGI:1861731]	-	0	0	0	42	19	7	0	0	0	0.31493	0.379084	0.186644
ENSMUSG00000030595	451.982	102.188	337.166	87.7094	104.526	127.502	297.112	106.579	1.47999	0.0229592	0.315812	Nfkbib	7	28758251	28767512	-	2169	protein_coding	nuclear factor of kappa light polypeptide gene enhancer in B cells inhibitor, beta [Source:MGI Symbol;Acc:MGI:104752]	-	296	105	285	239	105	96	20.9963	4.5677	15.6861	4.00228	4.6786	5.71653
ENSMUSG00000020312	0	5.83933	0	30.4598	16.9233	53.1259	1.94644	33.503	-4.0358	0.0248101	0.326697	Shc2	10	79618051	79637918	-	5426	protein_coding	SHC (Src homology 2 domain containing) transforming protein 2 [Source:MGI Symbol;Acc:MGI:106180]	-	0	6	0	83	17	40	0	0.104337	0	0.555606	0.3028	0.952141
ENSMUSG00000024789	1293.34	175.18	1198.42	219.09	381.273	361.256	888.979	320.54	1.47222	0.0283037	0.345157	Jak2	19	29251828	29313080	+	5030	protein_coding	Janus kinase 2 [Source:MGI Symbol;Acc:MGI:96629]	-	847	180	1013	597	383	272	25.9075	3.37654	24.0421	4.31097	7.35897	6.98428
ENSMUSG00000039943	948.246	399.994	734.667	385.334	355.39	296.177	694.302	345.634	1.00427	0.0296452	0.35076	Plcb4	2	135659011	136014593	+	8970	protein_coding	phospholipase C, beta 4 [Source:MGI Symbol;Acc:MGI:107464]	-	621	411	621	1050	357	223	10.6515	4.32331	8.26476	4.25173	3.84647	3.21095
ENSMUSG00000026180	221.41	2.91967	164.442	10.2756	35.8376	0	129.591	15.3711	3.07228	0.0350913	0.373778	Cxcr2	1	74153989	74161246	+	3048	protein_coding	chemokine (C-X-C motif) receptor 2 [Source:MGI Symbol;Acc:MGI:105303]	-	145	3	139	28	36	0	7.31919	0.0928696	5.44416	0.333666	1.14149	0
ENSMUSG00000034855	2313.35	0	524.086	15.0464	0	0	945.814	5.01546	7.54401	0.0437662	0.407353	Cxcl10	5	92346638	92348889	-	2252	protein_coding	chemokine (C-X-C motif) ligand 10 [Source:MGI Symbol;Acc:MGI:1352450]	-	1515	0	443	41	0	0	103.503	0	23.4837	0.661278	0	0
ENSMUSG00000029372	218.356	255.957	262.634	315.24	851.144	351.959	245.649	506.114	-1.04177	0.0494376	0.427487	Ppbp	5	90768518	90770063	+	1083	protein_coding	pro-platelet basic protein [Source:MGI Symbol;Acc:MGI:1888712]	-	143	263	222	859	855	265	20.315	22.9137	24.4712	28.8093	76.2999	31.6037
ENSMUSG00000068798	4023.56	1855.93	2193.35	1229.4	1634.59	1714.64	2690.95	1526.21	0.818234	0.0495758	0.427987	Rap1a	3	105727267	105801336	-	2607	protein_coding	RAS-related protein 1a [Source:MGI Symbol;Acc:MGI:97852]	-	2635	1907	1854	3350	1642	1291	155.507	69.0203	84.8984	46.6737	60.8721	63.9596
T helper marker
gene_id	TERC_Sa_1	TERC_Sa_2	TERC_Sa_3	TERC_mock_1	TERC_mock_2	TERC_mock_3	TERC_Sa	TERC_mock	log2FoldChange	pvalue	padj	gene_name	gene_chr	gene_start	gene_end	gene_strand	gene_length	gene_biotype	gene_description	tf_family	TERC_Sa_1_count	TERC_Sa_2_count	TERC_Sa_3_count	TERC_mock_1_count	TERC_mock_2_count	TERC_mock_3_count	TERC_Sa_1_fpkm	TERC_Sa_2_fpkm	TERC_Sa_3_fpkm	TERC_mock_1_fpkm	TERC_mock_2_fpkm	TERC_mock_3_fpkm
ENSMUSG00000028965	2653.87	16.5448	1993.42	12.1105	14.9324	11.9533	1554.61	12.9987	6.90275	1.23955e-11	3.69428e-08	Tnfrsf9	4	150914562	150946102	+	2722	protein_coding	tumor necrosis factor receptor superfamily, member 9 [Source:MGI Symbol;Acc:MGI:1101059]	-	1738	17	1685	33	15	9	98.2362	0.589289	73.8997	0.440346	0.532585	0.427047
ENSMUSG00000005763	0	0	0	30.8267	11.9459	67.7355	0	36.836	-7.37186	0.000283103	0.0316403	Cd247	1	165788681	165877277	+	5329	protein_coding	CD247 antigen [Source:MGI Symbol;Acc:MGI:88334]	-	0	0	0	84	12	51	0	0	0	0.572535	0.217631	1.23608
ENSMUSG00000005087	3418.88	772.738	2052.57	962.969	746.618	576.416	2081.4	762.001	1.44857	0.00760645	0.188131	Cd44	2	102811141	102901665	-	6776	protein_coding	CD44 antigen [Source:MGI Symbol;Acc:MGI:88338]	-	2239	794	1735	2624	750	434	50.8383	11.0564	30.5673	14.0656	10.6973	8.27251
ENSMUSG00000004040	2580.57	1107.53	2344.78	998.933	927.797	852.67	2010.96	926.467	1.11741	0.00805997	0.192977	Stat3	11	100885098	100939540	-	9527	protein_coding	signal transducer and activator of transcription 3 [Source:MGI Symbol;Acc:MGI:103038]	STAT	1690	1138	1982	2722	932	642	27.2923	11.2708	24.8358	10.3777	9.45466	8.70362
ENSMUSG00000048120	1462.83	290.993	716.921	331.387	361.363	120.861	823.583	271.204	1.59992	0.0144542	0.258209	Entpd1	19	40612366	40741602	+	5580	protein_coding	ectonucleoside triphosphate diphosphohydrolase 1 [Source:MGI Symbol;Acc:MGI:102805]	-	958	299	606	903	363	91	26.4144	5.05597	12.9649	5.8779	6.28722	2.10634
ENSMUSG00000026072	555.816	199.511	766.609	243.678	216.021	173.987	507.312	211.229	1.26192	0.0274051	0.339846	Il1r1	1	40225080	40317257	+	6363	protein_coding	interleukin 1 receptor, type I [Source:MGI Symbol;Acc:MGI:96545]	-	364	205	648	664	217	131	8.80135	3.0399	12.1575	3.79031	3.29598	2.65907
TCR signaling
gene_id	TERC_Sa_1	TERC_Sa_2	TERC_Sa_3	TERC_mock_1	TERC_mock_2	TERC_mock_3	TERC_Sa	TERC_mock	log2FoldChange	pvalue	padj	gene_name	gene_chr	gene_start	gene_end	gene_strand	gene_length	gene_biotype	gene_description	tf_family	TERC_Sa_1_count	TERC_Sa_2_count	TERC_Sa_3_count	TERC_mock_1_count	TERC_mock_2_count	TERC_mock_3_count	TERC_Sa_1_fpkm	TERC_Sa_2_fpkm	TERC_Sa_3_fpkm	TERC_mock_1_fpkm	TERC_mock_2_fpkm	TERC_mock_3_fpkm
ENSMUSG00000021025	13443.4	817.507	7970.13	658.738	852.14	792.904	7410.35	767.927	3.27058	4.2791e-06	0.00191731	Nfkbia	12	55489410	55492647	-	1610	protein_coding	nuclear factor of kappa light polypeptide gene enhancer in B cells inhibitor, alpha [Source:MGI Symbol;Acc:MGI:104741]	-	8804	840	6737	1795	856	597	841.326	49.229	499.542	40.4955	51.3847	47.8927
ENSMUSG00000024235	1059.72	41.8486	449.554	83.6726	13.9369	17.2659	517.039	38.2918	3.73813	0.000147433	0.0209238	Map3k8	18	4331327	4353015	-	4504	protein_coding	mitogen-activated protein kinase kinase kinase 8 [Source:MGI Symbol;Acc:MGI:1346878]	-	694	43	380	228	14	13	23.7067	0.900819	10.072	1.83868	0.300411	0.372791
ENSMUSG00000005763	0	0	0	30.8267	11.9459	67.7355	0	36.836	-7.37186	0.000283103	0.0316403	Cd247	1	165788681	165877277	+	5329	protein_coding	CD247 antigen [Source:MGI Symbol;Acc:MGI:88334]	-	0	0	0	84	12	51	0	0	0	0.572535	0.217631	1.23608
ENSMUSG00000023947	397.011	33.0896	552.479	53.5798	35.8376	26.5629	327.527	38.6601	3.07434	0.000454743	0.0429899	Nfkbie	17	45555703	45563169	+	3045	protein_coding	nuclear factor of kappa light polypeptide gene enhancer in B cells inhibitor, epsilon [Source:MGI Symbol;Acc:MGI:1194908]	-	260	34	467	146	36	20	13.137	1.05356	18.3088	1.74154	1.14262	0.848327
ENSMUSG00000032688	1600.26	56.4469	727.568	153.767	75.6573	81.017	794.759	103.48	2.93727	0.000643611	0.0530371	Malt1	18	65430962	65478823	+	11735	protein_coding	MALT1 paracaspase [Source:MGI Symbol;Acc:MGI:2445027]	-	1048	58	615	419	76	61	13.74	0.46635	6.25638	1.29688	0.625917	0.671379
ENSMUSG00000028191	1435.35	345.494	955.895	242.944	246.882	385.163	912.246	291.663	1.64588	0.00351602	0.132644	Bcl10	3	145922804	145934356	+	4564	protein_coding	B cell leukemia/lymphoma 10 [Source:MGI Symbol;Acc:MGI:1337994]	-	940	355	808	662	248	290	31.6878	7.33922	21.1347	5.26843	5.25161	8.20679
ENSMUSG00000028698	12.2157	123.599	29.5759	199.273	182.175	342.662	55.1303	241.37	-2.1207	0.012441	0.242536	Pik3r3	4	116221618	116303056	+	5300	protein_coding	phosphoinositide-3-kinase regulatory subunit 3 [Source:MGI Symbol;Acc:MGI:109277]	-	8	127	25	543	183	258	0.232233	2.26097	0.563113	3.72128	3.33704	6.28731
ENSMUSG00000033953	1410.92	558.63	1281.23	338.727	445.98	617.588	1083.59	467.432	1.21414	0.0127337	0.245878	Ppp3r1	11	17159263	17200375	+	3228	protein_coding	protein phosphatase 3, regulatory subunit B, alpha isoform (calcineurin B, type I) [Source:MGI Symbol;Acc:MGI:107172]	-	924	574	1083	923	448	465	44.0401	16.7782	40.0522	10.3857	13.4131	18.6055
ENSMUSG00000030595	451.982	102.188	337.166	87.7094	104.526	127.502	297.112	106.579	1.47999	0.0229592	0.315812	Nfkbib	7	28758251	28767512	-	2169	protein_coding	nuclear factor of kappa light polypeptide gene enhancer in B cells inhibitor, beta [Source:MGI Symbol;Acc:MGI:104752]	-	296	105	285	239	105	96	20.9963	4.5677	15.6861	4.00228	4.6786	5.71653
ENSMUSG00000002699	300.812	72.0184	398.684	83.6726	142.355	27.8911	257.172	84.6396	1.59996	0.0484798	0.426185	Lcp2	11	34046920	34092295	+	4459	protein_coding	lymphocyte cytosolic protein 2 [Source:MGI Symbol;Acc:MGI:1321402]	-	197	74	337	228	143	21	6.79733	1.56589	9.02243	1.85723	3.09945	0.608279
Myeloid supressor cells
gene_id	TERC_Sa_1	TERC_Sa_2	TERC_Sa_3	TERC_mock_1	TERC_mock_2	TERC_mock_3	TERC_Sa	TERC_mock	log2FoldChange	pvalue	padj	gene_name	gene_chr	gene_start	gene_end	gene_strand	gene_length	gene_biotype	gene_description	tf_family	TERC_Sa_1_count	TERC_Sa_2_count	TERC_Sa_3_count	TERC_mock_1_count	TERC_mock_2_count	TERC_mock_3_count	TERC_Sa_1_fpkm	TERC_Sa_2_fpkm	TERC_Sa_3_fpkm	TERC_mock_1_fpkm	TERC_mock_2_fpkm	TERC_mock_3_fpkm
ENSMUSG00000022582	24.4315	8.759	43.7724	2.93588	0	0	25.6543	0.978627	4.49913	0.0216603	0.309553	Ly6g	15	75155240	75159126	+	942	protein_coding	lymphocyte antigen 6 complex, locus G [Source:MGI Symbol;Acc:MGI:109440]	-	16	9	37	8	0	0	2.61324	0.901486	4.68902	0.308466	0	0

## Sheet: Terc_Sa vs Young_WT_Sa
Supplemental Table 3h. DEG of Tercko/ko S. aureus mice vs. Young WT S. aureus mice. All genes belonging to the respective pathways with a p value <0.05 are listed.
NLRP3 inflammasome signaling
gene_id	TERC_Sa_1	TERC_Sa_2	TERC_Sa_3	WT_Sa_1	WT_Sa_2	WT_Sa_3	TERC_Sa	WT_Sa	log2FoldChange	pvalue	padj	gene_name	gene_chr	gene_start	gene_end	gene_strand	gene_length	gene_biotype	gene_description	tf_family	TERC_Sa_1_count	TERC_Sa_2_count	TERC_Sa_3_count	WT_Sa_1_count	WT_Sa_2_count	WT_Sa_3_count	TERC_Sa_1_fpkm	TERC_Sa_2_fpkm	TERC_Sa_3_fpkm	WT_Sa_1_fpkm	WT_Sa_2_fpkm	WT_Sa_3_fpkm
ENSMUSG00000027398	3482.56	57.938	3413.26	99.1393	44.4995	10.34	2317.92	51.3263	5.50744	2.66121e-07	0.000268134	Il1b	2	129364570	129371139	-	1907	protein_coding	interleukin 1 beta [Source:MGI Symbol;Acc:MGI:96543]	-	2508	64	3178	67	41	27	202.342	3.16663	198.946	5.8338	2.48117	0.571636
ENSMUSG00000032691	329.093	9.05281	390.946	0	3.25606	5.74445	243.031	3.00017	6.22614	1.12257e-06	0.000787775	Nlrp3	11	59541568	59566956	+	4057	protein_coding	NLR family, pyrin domain containing 3 [Source:MGI Symbol;Acc:MGI:2653833]	-	237	10	364	0	3	15	8.9878	0.232575	10.7109	0	0.0853375	0.149277
ENSMUSG00000028268	1673.24	726.94	880.702	158.327	271.338	229.778	1093.63	219.814	2.31268	8.30774e-06	0.00352449	Gbp3	3	142560026	142573209	+	3265	protein_coding	guanylate binding protein 3 [Source:MGI Symbol;Acc:MGI:1926263]	-	1205	803	820	107	250	600	56.7824	23.206	29.9821	5.44162	8.83651	7.4195
ENSMUSG00000105504	1448.29	149.371	402.76	29.5938	56.4384	88.4646	666.806	58.1656	3.50922	2.51046e-05	0.00643668	Gbp5	3	142493978	142522344	+	6637	protein_coding	guanylate binding protein 5 [Source:MGI Symbol;Acc:MGI:2429943]	-	1043	165	375	20	52	231	24.1781	2.34574	6.74513	0.500364	0.904181	1.40523
ENSMUSG00000021025	12225	760.436	7235.72	844.904	694.626	656.399	6740.4	731.976	3.2031	3.09796e-05	0.00724674	Nfkbia	12	55489410	55492647	-	1610	protein_coding	nuclear factor of kappa light polypeptide gene enhancer in B cells inhibitor, alpha [Source:MGI Symbol;Acc:MGI:104741]	-	8804	840	6737	571	640	1714	841.326	49.229	499.542	58.8895	45.8752	42.9825
ENSMUSG00000019850	4404.57	97.7703	2082.54	42.911	10.8535	217.14	2194.96	90.3016	4.59605	3.35918e-05	0.00765368	Tnfaip3	10	19000910	19015657	-	7226	protein_coding	tumor necrosis factor, alpha-induced protein 3 [Source:MGI Symbol;Acc:MGI:1196377]	-	3172	108	1939	29	10	567	67.5375	1.41024	32.034	0.666389	0.159708	3.16805
ENSMUSG00000028270	1666.29	936.06	983.809	216.035	405.922	315.562	1195.39	312.506	1.93399	6.7014e-05	0.0110369	Gbp2	3	142620602	142638008	+	2516	protein_coding	guanylate binding protein 2 [Source:MGI Symbol;Acc:MGI:102772]	-	1200	1034	916	146	374	824	73.3805	38.7773	43.4626	9.6354	17.1548	13.2228
ENSMUSG00000029380	4175.46	0	740.005	0	2.17071	3.06371	1638.49	1.7448	9.83291	0.000396505	0.0312235	Cxcl1	5	90891241	90893115	+	1875	protein_coding	chemokine (C-X-C motif) ligand 1 [Source:MGI Symbol;Acc:MGI:108068]	-	3007	0	689	0	2	8	246.741	0	43.8681	0	0.123098	0.172264
ENSMUSG00000029379	4367.08	0	1318.91	0	0	0	1895.33	0	13.5644	0.000516638	0.0358257	Cxcl3	5	90786103	90789600	+	3498	protein_coding	chemokine (C-X-C motif) ligand 3 [Source:MGI Symbol;Acc:MGI:3037818]	-	3145	0	1228	0	0	0	138.328	0	41.9092	0	0	0
ENSMUSG00000046879	1153.91	693.445	815.187	214.555	231.18	405.941	887.514	283.892	1.64018	0.000867053	0.0474568	Irgm1	11	48861968	48871683	-	5810	protein_coding	immunity-related GTPase family M member 1 [Source:MGI Symbol;Acc:MGI:107567]	-	831	766	759	145	213	1060	22.0057	12.44	15.5954	4.144	4.23085	7.36608
ENSMUSG00000058427	19641.4	0	7758.77	1.47969	15.1949	0	9133.41	5.55821	10.6869	0.00101268	0.0506881	Cxcl2	5	90903871	90905938	+	2068	protein_coding	chemokine (C-X-C motif) ligand 2 [Source:MGI Symbol;Acc:MGI:1340094]	-	14145	0	7224	1	14	0	1052.36	0	417.021	0.0802929	0.78127	0
ENSMUSG00000035352	204.121	15.3898	131.031	0	0	9.95705	116.847	3.31902	5.00585	0.00102772	0.0507895	Ccl12	11	82101845	82103400	+	537	protein_coding	chemokine (C-C motif) ligand 12 [Source:MGI Symbol;Acc:MGI:108224]	-	147	17	122	0	0	26	42.1166	2.98705	27.1217	0	0	1.95481
ENSMUSG00000032000	2764.66	200.067	1975.14	116.896	102.023	501.299	1646.62	240.073	2.7744	0.00182556	0.0691741	Birc3	9	7848699	7873186	-	5009	protein_coding	baculoviral IAP repeat-containing 3 [Source:MGI Symbol;Acc:MGI:1197007]	-	1991	221	1839	79	94	1309	61.1547	4.16302	43.829	2.61881	2.16571	10.551
ENSMUSG00000027164	1110.86	137.603	607.899	99.1393	94.4258	182.291	618.788	125.285	2.29975	0.00226905	0.0780554	Traf6	2	101678429	101701669	+	7883	protein_coding	TNF receptor-associated factor 6 [Source:MGI Symbol;Acc:MGI:108072]	-	800	152	566	67	87	476	15.6138	1.81936	8.57148	1.41127	1.27365	2.43793
ENSMUSG00000007659	2843.81	1070.04	2533.63	753.163	887.819	370.709	2149.16	670.564	1.68131	0.00246923	0.0812803	Bcl2l1	2	152780668	152831728	-	4586	protein_coding	BCL2-like 1 [Source:MGI Symbol;Acc:MGI:88139]	-	2048	1182	2359	509	818	968	68.7078	24.3193	61.408	18.4294	20.5846	8.52212
ENSMUSG00000035385	931.736	19.9162	96.6625	69.5455	16.2803	11.4889	349.438	32.4382	3.44154	0.00370843	0.0987263	Ccl2	11	82035571	82037453	+	1138	protein_coding	chemokine (C-C motif) ligand 2 [Source:MGI Symbol;Acc:MGI:98259]	-	671	22	90	47	15	30	90.7173	1.8241	9.44129	6.85778	1.52115	1.06435
ENSMUSG00000021709	2877.14	1148.8	2486.37	408.395	1015.89	841.371	2170.77	755.219	1.52229	0.00548118	0.122188	Erbin	13	103818787	103920514	-	7939	protein_coding	Erbb2 interacting protein [Source:MGI Symbol;Acc:MGI:1890169]	-	2072	1269	2315	276	936	2197	40.1545	15.0822	34.811	5.77259	13.6061	11.173
ENSMUSG00000042644	36.1031	92.3386	32.2208	121.335	125.901	571.764	53.5542	273	-2.34942	0.00561196	0.124313	Itpr3	17	27057304	27122223	+	8990	protein_coding	inositol 1,4,5-triphosphate receptor 3 [Source:MGI Symbol;Acc:MGI:96624]	-	26	102	30	82	116	1493	0.444963	1.07055	0.398375	1.51454	1.48909	6.70512
ENSMUSG00000038393	9149.35	2551.08	4945.9	1624.7	2305.29	2110.89	5548.77	2013.63	1.46212	0.00631381	0.132692	Txnip	3	96557957	96561883	+	3123	protein_coding	thioredoxin interacting protein [Source:MGI Symbol;Acc:MGI:1889549]	-	6589	2818	4605	1098	2124	5512	324.607	85.1406	176.031	58.3792	78.4886	71.2597
ENSMUSG00000043909	13.8858	75.1383	51.5533	405.435	82.4869	208.332	46.8591	232.085	-2.30081	0.00773943	0.143078	Trp53bp1	2	121193281	121271407	-	14164	protein_coding	transformation related protein 53 binding protein 1 [Source:MGI Symbol;Acc:MGI:1351320]	-	10	83	48	274	76	544	0.108624	0.552917	0.404563	3.21212	0.619229	1.55067
ENSMUSG00000026393	1706.56	1366.07	2605.59	667.341	1105.98	737.205	1892.74	836.84	1.17744	0.0103534	0.165277	Nek7	1	138482875	138620141	-	7376	protein_coding	NIMA (never in mitosis gene a)-related expressed kinase 7 [Source:MGI Symbol;Acc:MGI:1890645]	-	1229	1509	2426	451	1019	1925	25.6354	19.3035	39.2646	10.1527	15.9433	10.537
ENSMUSG00000032508	1284.44	310.511	1380.13	374.362	367.935	229.395	991.691	323.897	1.61538	0.0104019	0.165449	Myd88	9	119335934	119341411	-	2576	protein_coding	myeloid differentiation primary response gene 88 [Source:MGI Symbol;Acc:MGI:108005]	-	925	343	1285	253	339	599	55.2466	12.5636	59.5509	16.3081	15.1872	9.38831
ENSMUSG00000078942	0	0	0	48.8298	0	32.5519	0	27.1272	-7.05929	0.0121933	0.178326	Naip6	13	100281121	100317674	-	6827	protein_coding	NLR family, apoptosis inhibitory protein 6 [Source:MGI Symbol;Acc:MGI:1298222]	-	0	0	0	33	0	85	0	0	0	0.802623	0	0.502685
ENSMUSG00000020572	1707.95	663.571	1255.54	464.623	442.824	630.358	1209.02	512.602	1.23645	0.013651	0.188827	Nampt	12	32819545	32853349	+	5054	protein_coding	nicotinamide phosphoribosyltransferase [Source:MGI Symbol;Acc:MGI:1929865]	-	1230	733	1169	314	408	1646	37.4438	13.6847	27.6128	10.3163	9.31641	13.1493
ENSMUSG00000024401	594.312	0	422.093	5.91877	13.0242	63.5719	338.802	27.505	3.60886	0.0145492	0.194552	Tnf	17	35199381	35202007	-	1639	protein_coding	tumor necrosis factor [Source:MGI Symbol;Acc:MGI:104798]	-	428	0	393	4	12	166	40.1767	0	28.6249	0.405237	0.84494	4.08918
ENSMUSG00000020115	572.095	212.741	441.425	85.8221	129.157	222.885	408.754	145.955	1.47881	0.0192395	0.221627	Tbk1	10	121546455	121586787	-	3910	protein_coding	TANK-binding kinase 1 [Source:MGI Symbol;Acc:MGI:1929658]	-	412	235	411	58	119	582	16.2118	5.67099	12.5486	2.46308	3.51232	6.0097
ENSMUSG00000038357	583.203	0	300.728	0	10.8535	0.382963	294.644	3.7455	6.30329	0.0244967	0.244188	Camp	9	109847379	109849617	-	758	protein_coding	cathelicidin antimicrobial peptide [Source:MGI Symbol;Acc:MGI:108443]	-	420	0	280	0	10	1	85.2491	0	44.0981	0	1.52249	0.0532644
ENSMUSG00000029468	12.4972	69.7066	20.4065	195.319	64.0359	167.738	34.2034	142.364	-2.04874	0.0247719	0.245229	P2rx7	5	122643911	122691432	+	5970	protein_coding	purinergic receptor P2X, ligand-gated ion channel, 7 [Source:MGI Symbol;Acc:MGI:1339957]	-	9	77	19	132	59	438	0.231941	1.21698	0.379936	3.67136	1.14052	2.96215
ENSMUSG00000007815	2714.67	1896.56	2563.7	1368.71	1543.37	1036.68	2391.65	1316.26	0.861959	0.0294678	0.267563	Rhoa	9	108306129	108337934	+	7494	protein_coding	ras homolog family member A [Source:MGI Symbol;Acc:MGI:1096342]	-	1955	2095	2387	925	1422	2707	40.1368	26.3778	38.025	20.4954	21.8983	14.5842
ENSMUSG00000033538	569.317	100.486	467.202	71.0252	143.267	157.015	379.002	123.769	1.61016	0.0295836	0.267563	Casp4	9	5308828	5336783	+	3710	protein_coding	caspase 4, apoptosis-related cysteine peptidase [Source:MGI Symbol;Acc:MGI:107700]	-	410	111	435	48	132	410	17.0028	2.82304	13.9974	2.1483	4.10605	4.46187
ENSMUSG00000015755	1334.42	918.86	1368.31	566.722	831.381	534.234	1207.2	644.112	0.906468	0.0353001	0.294347	Tab2	10	7905653	7956230	-	6135	protein_coding	TGF-beta activated kinase 1/MAP3K7 binding protein 2 [Source:MGI Symbol;Acc:MGI:1915902]	-	961	1015	1274	383	766	1395	24.1001	15.6106	24.7905	10.366	14.4091	9.1805
ENSMUSG00000027466	209.675	507.862	293.209	655.503	616.481	816.478	336.916	696.154	-1.04601	0.0398238	0.31254	Rbck1	2	152316334	152332653	-	4601	protein_coding	RanBP-type and C3HC4-type zinc finger containing 1 [Source:MGI Symbol;Acc:MGI:1344372]	-	151	561	273	443	568	2132	5.04934	11.5048	7.08339	15.9874	14.2469	18.7086
ENSMUSG00000021408	474.894	143.94	410.278	44.3907	148.693	178.461	343.037	123.848	1.46344	0.0463575	0.335696	Ripk1	13	34002363	34037147	+	8344	protein_coding	receptor (TNFRSF)-interacting serine-threonine kinase 1 [Source:MGI Symbol;Acc:MGI:108212]	-	342	159	382	30	137	466	6.30611	1.798	5.46538	0.597	1.89483	2.25485
ENSMUSG00000032175	0	107.728	32.2208	309.255	96.5965	341.603	46.6497	249.152	-2.41231	0.0477542	0.339602	Tyk2	9	21104068	21131243	-	6865	protein_coding	tyrosine kinase 2 [Source:MGI Symbol;Acc:MGI:1929470]	-	0	119	30	209	89	892	0	1.63559	0.521689	5.05514	1.49614	5.24603
Macrophage marker
gene_id	TERC_Sa_1	TERC_Sa_2	TERC_Sa_3	WT_Sa_1	WT_Sa_2	WT_Sa_3	TERC_Sa	WT_Sa	log2FoldChange	pvalue	padj	gene_name	gene_chr	gene_start	gene_end	gene_strand	gene_length	gene_biotype	gene_description	tf_family	TERC_Sa_1_count	TERC_Sa_2_count	TERC_Sa_3_count	WT_Sa_1_count	WT_Sa_2_count	WT_Sa_3_count	TERC_Sa_1_fpkm	TERC_Sa_2_fpkm	TERC_Sa_3_fpkm	WT_Sa_1_fpkm	WT_Sa_2_fpkm	WT_Sa_3_fpkm
ENSMUSG00000027398	3482.56	57.938	3413.26	99.1393	44.4995	10.34	2317.92	51.3263	5.50744	2.66121e-07	0.000268134	Il1b	2	129364570	129371139	-	1907	protein_coding	interleukin 1 beta [Source:MGI Symbol;Acc:MGI:96543]	-	2508	64	3178	67	41	27	202.342	3.16663	198.946	5.8338	2.48117	0.571636
ENSMUSG00000051439	9599.25	186.488	4239.19	440.948	322.35	351.56	4674.97	371.619	3.65321	6.81827e-05	0.0110759	Cd14	18	36725074	36726736	-	1572	protein_coding	CD14 antigen [Source:MGI Symbol;Acc:MGI:88318]	-	6913	206	3947	298	297	918	676.587	12.3647	299.741	31.4769	21.8036	23.5774
ENSMUSG00000058427	19641.4	0	7758.77	1.47969	15.1949	0	9133.41	5.55821	10.6869	0.00101268	0.0506881	Cxcl2	5	90903871	90905938	+	2068	protein_coding	chemokine (C-X-C motif) ligand 2 [Source:MGI Symbol;Acc:MGI:1340094]	-	14145	0	7224	1	14	0	1052.36	0	417.021	0.0802929	0.78127	0
ENSMUSG00000027995	631.803	19.0109	515.533	45.8704	28.2192	62.423	388.782	45.5042	3.09042	0.00185797	0.0701032	Tlr2	3	83836272	83841767	-	3014	protein_coding	toll-like receptor 2 [Source:MGI Symbol;Acc:MGI:1346060]	-	455	21	480	31	26	163	23.2262	0.657421	19.0121	1.70784	0.995529	2.18349
ENSMUSG00000035385	931.736	19.9162	96.6625	69.5455	16.2803	11.4889	349.438	32.4382	3.44154	0.00370843	0.0987263	Ccl2	11	82035571	82037453	+	1138	protein_coding	chemokine (C-C motif) ligand 2 [Source:MGI Symbol;Acc:MGI:98259]	-	671	22	90	47	15	30	90.7173	1.8241	9.44129	6.85778	1.52115	1.06435
ENSMUSG00000030786	145.801	50.6957	327.578	41.4314	48.8409	23.7437	174.692	38.0053	2.20746	0.00952481	0.158006	Itgam	7	128062640	128118491	+	5024	protein_coding	integrin alpha M [Source:MGI Symbol;Acc:MGI:96607]	-	105	56	305	28	45	62	3.21551	1.05173	7.24738	0.925414	1.03368	0.498252
ENSMUSG00000014599	691.512	120.402	393.094	16.2766	71.6333	169.27	401.67	85.7266	2.21798	0.0137937	0.189128	Csf1	3	107741048	107760469	-	5281	protein_coding	colony stimulating factor 1 (macrophage) [Source:MGI Symbol;Acc:MGI:1339753]	-	498	133	366	11	66	442	14.5085	2.37631	8.27363	0.345863	1.44229	3.37919
ENSMUSG00000024401	594.312	0	422.093	5.91877	13.0242	63.5719	338.802	27.505	3.60886	0.0145492	0.194552	Tnf	17	35199381	35202007	-	1639	protein_coding	tumor necrosis factor [Source:MGI Symbol;Acc:MGI:104798]	-	428	0	393	4	12	166	40.1767	0	28.6249	0.405237	0.84494	4.08918
ENSMUSG00000026395	186.07	152.087	258.841	244.149	160.632	1892.22	198.999	765.668	-1.94556	0.0247814	0.245229	Ptprc	1	138062861	138175708	-	18313	protein_coding	protein tyrosine phosphatase, receptor type, C [Source:MGI Symbol;Acc:MGI:97810]	-	134	168	241	165	148	4941	1.12578	0.8656	1.57104	1.49607	0.932666	10.8934
ENSMUSG00000026072	505.443	185.583	695.97	147.969	196.449	196.077	462.332	180.165	1.35781	0.0267372	0.254753	Il1r1	1	40225080	40317257	+	6363	protein_coding	interleukin 1 receptor, type I [Source:MGI Symbol;Acc:MGI:96545]	-	364	205	648	100	181	512	8.80135	3.0399	12.1575	2.60955	3.28277	3.24874
ENSMUSG00000079018	3052.1	1678.39	2299.49	1379.07	1370.8	953.962	2343.33	1234.61	0.924884	0.0307218	0.273743	Ly6c1	15	75044018	75048830	-	1677	protein_coding	lymphocyte antigen 6 complex, locus C1 [Source:MGI Symbol;Acc:MGI:96882]	-	2198	1854	2141	932	1263	2491	201.653	104.314	152.41	92.2806	86.9149	59.9718
ENSMUSG00000021356	0	21.7267	0	51.7892	73.804	104.549	7.24224	76.7141	-3.38473	0.0369952	0.300344	Irf4	13	30749226	30766976	+	4903	protein_coding	interferon regulatory factor 4 [Source:MGI Symbol;Acc:MGI:1096873]	IRF	0	24	0	35	68	273	0	0.461867	0	1.18532	1.60056	2.24806
ENSMUSG00000022667	47.2117	25.3479	154.66	8.87815	24.9631	17.6163	75.7398	17.1525	2.13576	0.0416158	0.320927	Cd200r1	16	44765736	44794978	+	3348	protein_coding	CD200 receptor 1 [Source:MGI Symbol;Acc:MGI:1889024]	-	34	28	144	6	23	46	1.56244	0.789115	5.13462	0.297573	0.792805	0.554727
Chemokine signaling
gene_id	TERC_Sa_1	TERC_Sa_2	TERC_Sa_3	WT_Sa_1	WT_Sa_2	WT_Sa_3	TERC_Sa	WT_Sa	log2FoldChange	pvalue	padj	gene_name	gene_chr	gene_start	gene_end	gene_strand	gene_length	gene_biotype	gene_description	tf_family	TERC_Sa_1_count	TERC_Sa_2_count	TERC_Sa_3_count	WT_Sa_1_count	WT_Sa_2_count	WT_Sa_3_count	TERC_Sa_1_fpkm	TERC_Sa_2_fpkm	TERC_Sa_3_fpkm	WT_Sa_1_fpkm	WT_Sa_2_fpkm	WT_Sa_3_fpkm
ENSMUSG00000018930	1103.92	13.5792	414.575	0	0	3.82963	510.691	1.27654	8.33303	2.65187e-09	6.64635e-06	Ccl4	11	83662584	83664683	+	660	protein_coding	chemokine (C-C motif) ligand 4 [Source:MGI Symbol;Acc:MGI:98261]	-	795	15	386	0	0	10	185.325	2.14444	69.8191	0	0	0.611734
ENSMUSG00000021025	12225	760.436	7235.72	844.904	694.626	656.399	6740.4	731.976	3.2031	3.09796e-05	0.00724674	Nfkbia	12	55489410	55492647	-	1610	protein_coding	nuclear factor of kappa light polypeptide gene enhancer in B cells inhibitor, alpha [Source:MGI Symbol;Acc:MGI:104741]	-	8804	840	6737	571	640	1714	841.326	49.229	499.542	58.8895	45.8752	42.9825
ENSMUSG00000029380	4175.46	0	740.005	0	2.17071	3.06371	1638.49	1.7448	9.83291	0.000396505	0.0312235	Cxcl1	5	90891241	90893115	+	1875	protein_coding	chemokine (C-X-C motif) ligand 1 [Source:MGI Symbol;Acc:MGI:108068]	-	3007	0	689	0	2	8	246.741	0	43.8681	0	0.123098	0.172264
ENSMUSG00000029379	4367.08	0	1318.91	0	0	0	1895.33	0	13.5644	0.000516638	0.0358257	Cxcl3	5	90786103	90789600	+	3498	protein_coding	chemokine (C-X-C motif) ligand 3 [Source:MGI Symbol;Acc:MGI:3037818]	-	3145	0	1228	0	0	0	138.328	0	41.9092	0	0	0
ENSMUSG00000000982	4007.44	7.24224	2585.18	0	32.5606	3.06371	2199.95	11.8748	7.5349	0.000703142	0.0414842	Ccl3	11	83647844	83649355	-	766	protein_coding	chemokine (C-C motif) ligand 3 [Source:MGI Symbol;Acc:MGI:98260]	-	2886	8	2407	0	30	8	579.666	0.985437	375.127	0	4.51977	0.421665
ENSMUSG00000058427	19641.4	0	7758.77	1.47969	15.1949	0	9133.41	5.55821	10.6869	0.00101268	0.0506881	Cxcl2	5	90903871	90905938	+	2068	protein_coding	chemokine (C-X-C motif) ligand 2 [Source:MGI Symbol;Acc:MGI:1340094]	-	14145	0	7224	1	14	0	1052.36	0	417.021	0.0802929	0.78127	0
ENSMUSG00000035352	204.121	15.3898	131.031	0	0	9.95705	116.847	3.31902	5.00585	0.00102772	0.0507895	Ccl12	11	82101845	82103400	+	537	protein_coding	chemokine (C-C motif) ligand 12 [Source:MGI Symbol;Acc:MGI:108224]	-	147	17	122	0	0	26	42.1166	2.98705	27.1217	0	0	1.95481
ENSMUSG00000052681	8248.16	2446.07	6769.59	1744.56	2133.8	1209.78	5821.27	1696.05	1.77935	0.00104298	0.0511394	Rap1b	10	117813871	117846035	-	2884	protein_coding	RAS related protein 1b [Source:MGI Symbol;Acc:MGI:894315]	-	5940	2702	6303	1179	1966	3159	316.885	88.4011	260.905	67.8807	78.6705	44.2243
ENSMUSG00000025804	404.076	14.4845	635.824	0	43.4141	5.74445	351.462	16.3862	4.42439	0.00105335	0.0514762	Ccr1	9	123962124	123968692	-	2833	protein_coding	chemokine (C-C motif) receptor 1 [Source:MGI Symbol;Acc:MGI:104618]	-	291	16	592	0	40	15	15.8036	0.532894	24.9463	0	1.62944	0.213772
ENSMUSG00000018920	1448.29	480.704	1589.56	208.636	397.239	348.497	1172.85	318.124	1.88082	0.00125941	0.0567999	Cxcl16	11	70453983	70459984	-	3021	protein_coding	chemokine (C-X-C motif) ligand 16 [Source:MGI Symbol;Acc:MGI:1932682]	-	1043	531	1480	141	366	910	53.1182	16.5848	58.4847	7.7499	13.9815	12.1618
ENSMUSG00000036402	2468.89	781.257	2286.6	624.43	642.529	333.561	1845.58	533.507	1.79155	0.00163016	0.0658976	Gng12	6	66896397	67021350	+	4727	protein_coding	guanine nucleotide binding protein (G protein), gamma 12 [Source:MGI Symbol;Acc:MGI:1336171]	-	1778	863	2129	422	592	871	57.8703	17.2263	53.7677	14.8236	14.4531	7.43942
ENSMUSG00000026166	1433.01	10.8634	244.878	0	0	9.57409	562.918	3.19136	7.4037	0.00236335	0.0794302	Ccl20	1	83116766	83119167	+	1421	protein_coding	chemokine (C-C motif) ligand 20 [Source:MGI Symbol;Acc:MGI:1329031]	-	1032	12	228	0	0	25	111.737	0.79681	19.1545	0	0	0.710318
ENSMUSG00000000001	1619.08	820.184	1590.63	556.364	555.701	483.3	1343.3	531.788	1.33705	0.00297439	0.0879979	Gnai3	3	108107280	108146146	-	3262	protein_coding	guanine nucleotide binding protein (G protein), alpha inhibiting 3 [Source:MGI Symbol;Acc:MGI:95773]	-	1166	906	1481	376	512	1262	54.9952	26.2067	54.2004	19.1395	18.1138	15.62
ENSMUSG00000034855	2103.7	0	475.794	14.7969	9.76818	6.89334	859.83	10.4861	6.36287	0.00300973	0.0887439	Cxcl10	5	92346638	92348889	-	2252	protein_coding	chemokine (C-X-C motif) ligand 10 [Source:MGI Symbol;Acc:MGI:1352450]	-	1515	0	443	10	9	18	103.503	0	23.4837	0.737326	0.461209	0.322709
ENSMUSG00000035385	931.736	19.9162	96.6625	69.5455	16.2803	11.4889	349.438	32.4382	3.44154	0.00370843	0.0987263	Ccl2	11	82035571	82037453	+	1138	protein_coding	chemokine (C-C motif) ligand 2 [Source:MGI Symbol;Acc:MGI:98259]	-	671	22	90	47	15	30	90.7173	1.8241	9.44129	6.85778	1.52115	1.06435
ENSMUSG00000031659	87.4805	80.57	127.809	230.832	195.364	685.888	98.6199	370.694	-1.9132	0.00458478	0.110333	Adcy7	8	88272403	88329962	+	6733	protein_coding	adenylate cyclase 7 [Source:MGI Symbol;Acc:MGI:102891]	-	63	89	119	156	180	1791	1.4396	1.24724	2.10994	3.84719	3.08523	10.7397
ENSMUSG00000068798	3658.91	1726.37	1991.25	978.076	1256.84	633.039	2458.84	955.985	1.36339	0.00599483	0.128731	Rap1a	3	105727267	105801336	-	2607	protein_coding	RAS-related protein 1a [Source:MGI Symbol;Acc:MGI:97852]	-	2635	1907	1854	661	1158	1653	155.507	69.0203	84.8984	42.1006	51.2615	25.5999
ENSMUSG00000035109	0	0	0	35.5126	8.68283	13.7867	0	19.3274	-6.56694	0.00754395	0.142039	Shc4	2	125627447	125724148	-	8263	protein_coding	SHC (Src homology 2 domain containing) family, member 4 [Source:MGI Symbol;Acc:MGI:2655364]	-	0	0	0	24	8	36	0	0	0	0.482282	0.111732	0.175902
ENSMUSG00000029371	1020.61	0	40.813	32.5532	27.1338	4.97853	353.806	21.5552	4.04562	0.00980966	0.160243	Cxcl5	5	90759360	90761624	+	1863	protein_coding	chemokine (C-X-C motif) ligand 5 [Source:MGI Symbol;Acc:MGI:1096868]	-	735	0	38	22	25	13	60.6994	0	2.43502	1.96082	1.54864	0.281733
ENSMUSG00000020580	2664.68	1028.4	1430.6	704.333	854.173	526.958	1707.9	695.155	1.2971	0.0107547	0.167789	Rock2	12	16894895	16987823	+	13897	protein_coding	Rho-associated coiled-coil containing protein kinase 2 [Source:MGI Symbol;Acc:MGI:107926]	-	1919	1136	1332	476	787	1376	21.2453	7.71303	11.4423	5.6874	6.53548	3.99764
ENSMUSG00000020395	0	42.5482	11.8143	145.01	33.646	351.943	18.1208	176.866	-3.27714	0.011065	0.169615	Itk	11	46325150	46389515	-	5354	protein_coding	IL2 inducible T cell kinase [Source:MGI Symbol;Acc:MGI:96621]	-	0	47	11	98	31	919	0	0.828299	0.245271	3.03931	0.668201	6.93017
ENSMUSG00000020143	55.5432	97.7703	41.8871	196.799	67.2919	579.807	65.0668	281.299	-2.11315	0.0129146	0.183953	Dock2	11	34226815	34783892	-	11425	protein_coding	dedicator of cyto-kinesis 2 [Source:MGI Symbol;Acc:MGI:2149010]	-	40	108	39	133	62	1514	0.538659	0.891939	0.407511	1.93296	0.626267	5.35028
ENSMUSG00000035373	247.167	17.2003	120.291	29.5938	0	6.51038	128.219	12.0347	3.43777	0.0130017	0.184698	Ccl7	11	82045712	82047525	+	801	protein_coding	chemokine (C-C motif) ligand 7 [Source:MGI Symbol;Acc:MGI:99512]	-	178	19	112	20	0	17	34.1899	2.23815	16.6923	4.14596	0	0.856886
ENSMUSG00000048480	0	0	0	93.2206	0	0.765927	0	31.3288	-7.26356	0.0152755	0.200914	Cxcr1	1	74191785	74194631	-	1491	protein_coding	chemokine (C-X-C motif) receptor 1 [Source:MGI Symbol;Acc:MGI:2448715]	-	0	0	0	63	0	2	0	0	0	7.01602	0	0.0541575
ENSMUSG00000024789	1176.13	162.951	1087.99	116.896	219.241	361.135	809.022	232.424	1.79615	0.0185041	0.218458	Jak2	19	29251828	29313080	+	5030	protein_coding	Janus kinase 2 [Source:MGI Symbol;Acc:MGI:96629]	-	847	180	1013	79	202	943	25.9075	3.37654	24.0421	2.60787	4.63455	7.56921
ENSMUSG00000004040	2346.7	1030.21	2128.72	763.521	1047.37	800.011	1835.21	870.299	1.07613	0.0227107	0.238442	Stat3	11	100885098	100939540	-	9527	protein_coding	signal transducer and activator of transcription 3 [Source:MGI Symbol;Acc:MGI:103038]	STAT	1690	1138	1982	516	965	2089	27.2923	11.2708	24.8358	8.99334	11.6895	8.85297
ENSMUSG00000001847	2743.83	1258.34	2498.19	1160.08	1176.52	745.247	2166.79	1027.28	1.07721	0.0235499	0.241473	Rac1	5	143503634	143528036	-	4496	protein_coding	Rac family small GTPase 1 [Source:MGI Symbol;Acc:MGI:97845]	-	1976	1390	2326	784	1084	1946	67.6193	29.1713	61.761	28.9546	27.8245	17.4752
ENSMUSG00000063594	0	28.969	0	226.393	125.901	20.68	9.65633	124.325	-3.66841	0.024682	0.244921	Gng8	7	16891786	16895436	+	1522	protein_coding	guanine nucleotide binding protein (G protein), gamma 8 [Source:MGI Symbol;Acc:MGI:109163]	-	0	32	0	153	116	54	0	1.98382	0	16.6918	8.79563	1.43247
ENSMUSG00000039936	123.584	129.455	152.512	272.263	144.352	807.67	135.184	408.095	-1.59645	0.0250581	0.246838	Pik3cd	4	149649168	149702571	-	6259	protein_coding	phosphatidylinositol-4,5-bisphosphate 3-kinase catalytic subunit delta [Source:MGI Symbol;Acc:MGI:1098211]	-	89	143	142	184	133	2109	2.18774	2.15575	2.70841	4.88136	2.45228	13.6044
ENSMUSG00000030265	1477.45	1105.35	1496.12	437.989	1013.72	369.177	1359.64	606.962	1.1641	0.0274025	0.257827	Kras	6	145216699	145250239	-	5347	protein_coding	Kirsten rat sarcoma viral oncogene homolog [Source:MGI Symbol;Acc:MGI:96680]	-	1064	1221	1393	296	934	964	30.6155	21.5463	31.1008	9.19198	20.1586	7.27903
ENSMUSG00000042249	309.653	308.701	268.507	667.341	436.312	623.082	295.62	575.578	-0.961329	0.0275291	0.258827	Grk3	5	112910482	113015791	-	8693	protein_coding	G protein-coupled receptor kinase 3 [Source:MGI Symbol;Acc:MGI:87941]	-	223	341	250	451	402	1627	3.9468	3.70128	3.43322	8.61459	5.33679	7.55657
ENSMUSG00000007815	2714.67	1896.56	2563.7	1368.71	1543.37	1036.68	2391.65	1316.26	0.861959	0.0294678	0.267563	Rhoa	9	108306129	108337934	+	7494	protein_coding	ras homolog family member A [Source:MGI Symbol;Acc:MGI:1096342]	-	1955	2095	2387	925	1422	2707	40.1368	26.3778	38.025	20.4954	21.8983	14.5842
ENSMUSG00000020312	0	5.43168	0	56.2283	27.1338	12.6378	1.81056	32	-4.08088	0.0301813	0.270568	Shc2	10	79618051	79637918	-	5426	protein_coding	SHC (Src homology 2 domain containing) transforming protein 2 [Source:MGI Symbol;Acc:MGI:106180]	-	0	6	0	38	25	33	0	0.104337	0	1.16287	0.531721	0.24555
T helper marker
gene_id	TERC_Sa_1	TERC_Sa_2	TERC_Sa_3	WT_Sa_1	WT_Sa_2	WT_Sa_3	TERC_Sa	WT_Sa	log2FoldChange	pvalue	padj	gene_name	gene_chr	gene_start	gene_end	gene_strand	gene_length	gene_biotype	gene_description	tf_family	TERC_Sa_1_count	TERC_Sa_2_count	TERC_Sa_3_count	WT_Sa_1_count	WT_Sa_2_count	WT_Sa_3_count	TERC_Sa_1_fpkm	TERC_Sa_2_fpkm	TERC_Sa_3_fpkm	WT_Sa_1_fpkm	WT_Sa_2_fpkm	WT_Sa_3_fpkm
ENSMUSG00000005763	0	0	0	45.8704	28.2192	207.949	0	94.0129	-8.85749	4.4423e-07	0.000389678	Cd247	1	165788681	165877277	+	5329	protein_coding	CD247 antigen [Source:MGI Symbol;Acc:MGI:88334]	-	0	0	0	31	26	543	0	0	0	0.965925	0.563056	4.11397
ENSMUSG00000028965	2413.35	15.3898	1809.74	34.0329	4.34141	69.3164	1412.83	35.8969	5.28963	8.43756e-06	0.00352449	Tnfrsf9	4	150914562	150946102	+	2722	protein_coding	tumor necrosis factor receptor superfamily, member 9 [Source:MGI Symbol;Acc:MGI:1101059]	-	1738	17	1685	23	4	181	98.2362	0.589289	73.8997	1.40303	0.169588	2.68471
ENSMUSG00000026285	0	0	0	39.9517	3.25606	36.3815	0	26.5298	-7.02822	0.00265835	0.0837224	Pdcd1	1	94038305	94052553	-	1930	protein_coding	programmed cell death 1 [Source:MGI Symbol;Acc:MGI:104879]	-	0	0	0	27	3	95	0	0	0	2.32292	0.179386	1.98734
ENSMUSG00000048120	1330.26	270.679	650.861	140.571	263.741	189.95	750.599	198.087	1.92052	0.0034155	0.0952647	Entpd1	19	40612366	40741602	+	5580	protein_coding	ectonucleoside triphosphate diphosphohydrolase 1 [Source:MGI Symbol;Acc:MGI:102805]	-	958	299	606	95	243	496	26.4144	5.05597	12.9649	2.82694	5.02569	3.58884
ENSMUSG00000023274	0	23.5373	1.07403	48.8298	6.51212	351.178	8.20377	135.506	-4.02978	0.0121309	0.178269	Cd4	6	124864692	124888221	-	4032	protein_coding	CD4 antigen [Source:MGI Symbol;Acc:MGI:88335]	-	0	26	1	33	6	917	0	0.608444	0.0296081	1.35901	0.171733	9.18238
ENSMUSG00000030336	16.6629	34.4007	32.2208	105.058	36.902	236.671	27.7615	126.211	-2.1845	0.0163961	0.207266	Cd27	6	125232622	125237010	-	2328	protein_coding	CD27 antigen [Source:MGI Symbol;Acc:MGI:88326]	-	12	38	30	71	34	618	0.793064	1.54017	1.5384	5.06411	1.68546	10.718
ENSMUSG00000027863	33.3259	32.5901	23.6286	19.236	69.4626	397.899	29.8482	162.199	-2.44756	0.0207182	0.230702	Cd2	3	101275899	101287939	-	1741	protein_coding	CD2 antigen [Source:MGI Symbol;Acc:MGI:88320]	-	24	36	22	13	64	1039	2.12091	1.95106	1.50853	1.23986	4.24234	24.0948
ENSMUSG00000004040	2346.7	1030.21	2128.72	763.521	1047.37	800.011	1835.21	870.299	1.07613	0.0227107	0.238442	Stat3	11	100885098	100939540	-	9527	protein_coding	signal transducer and activator of transcription 3 [Source:MGI Symbol;Acc:MGI:103038]	STAT	1690	1138	1982	516	965	2089	27.2923	11.2708	24.8358	8.99334	11.6895	8.85297
ENSMUSG00000024669	0	0	0	119.855	0	159.313	0	93.0559	-8.83841	0.0237101	0.242322	Cd5	19	10718143	10738974	-	2069	protein_coding	CD5 antigen [Source:MGI Symbol;Acc:MGI:88340]	-	0	0	0	81	0	416	0	0	0	6.50058	0	8.11782
ENSMUSG00000026072	505.443	185.583	695.97	147.969	196.449	196.077	462.332	180.165	1.35781	0.0267372	0.254753	Il1r1	1	40225080	40317257	+	6363	protein_coding	interleukin 1 receptor, type I [Source:MGI Symbol;Acc:MGI:96545]	-	364	205	648	100	181	512	8.80135	3.0399	12.1575	2.60955	3.28277	3.24874
ENSMUSG00000000409	148.578	159.329	46.1832	208.636	70.548	1111.36	118.03	463.515	-1.97555	0.0361295	0.29661	Lck	4	129548344	129573641	-	2929	protein_coding	lymphocyte protein tyrosine kinase [Source:MGI Symbol;Acc:MGI:96756]	-	107	176	43	141	65	2902	5.62049	5.66971	1.75259	7.99332	2.56105	40.0023
ENSMUSG00000021356	0	21.7267	0	51.7892	73.804	104.549	7.24224	76.7141	-3.38473	0.0369952	0.300344	Irf4	13	30749226	30766976	+	4903	protein_coding	interferon regulatory factor 4 [Source:MGI Symbol;Acc:MGI:1096873]	IRF	0	24	0	35	68	273	0	0.461867	0	1.18532	1.60056	2.24806
TCR signaling
gene_id	TERC_Sa_1	TERC_Sa_2	TERC_Sa_3	WT_Sa_1	WT_Sa_2	WT_Sa_3	TERC_Sa	WT_Sa	log2FoldChange	pvalue	padj	gene_name	gene_chr	gene_start	gene_end	gene_strand	gene_length	gene_biotype	gene_description	tf_family	TERC_Sa_1_count	TERC_Sa_2_count	TERC_Sa_3_count	WT_Sa_1_count	WT_Sa_2_count	WT_Sa_3_count	TERC_Sa_1_fpkm	TERC_Sa_2_fpkm	TERC_Sa_3_fpkm	WT_Sa_1_fpkm	WT_Sa_2_fpkm	WT_Sa_3_fpkm
ENSMUSG00000005763	0	0	0	45.8704	28.2192	207.949	0	94.0129	-8.85749	4.4423e-07	0.000389678	Cd247	1	165788681	165877277	+	5329	protein_coding	CD247 antigen [Source:MGI Symbol;Acc:MGI:88334]	-	0	0	0	31	26	543	0	0	0	0.965925	0.563056	4.11397
ENSMUSG00000021025	12225	760.436	7235.72	844.904	694.626	656.399	6740.4	731.976	3.2031	3.09796e-05	0.00724674	Nfkbia	12	55489410	55492647	-	1610	protein_coding	nuclear factor of kappa light polypeptide gene enhancer in B cells inhibitor, alpha [Source:MGI Symbol;Acc:MGI:104741]	-	8804	840	6737	571	640	1714	841.326	49.229	499.542	58.8895	45.8752	42.9825
ENSMUSG00000024235	963.674	38.9271	408.13	26.6344	18.451	79.2734	470.244	41.453	3.49066	0.000450903	0.0336935	Map3k8	18	4331327	4353015	-	4504	protein_coding	mitogen-activated protein kinase kinase kinase 8 [Source:MGI Symbol;Acc:MGI:1346878]	-	694	43	380	18	17	207	23.7067	0.900819	10.072	0.663593	0.435586	1.85558
ENSMUSG00000026285	0	0	0	39.9517	3.25606	36.3815	0	26.5298	-7.02822	0.00265835	0.0837224	Pdcd1	1	94038305	94052553	-	1930	protein_coding	programmed cell death 1 [Source:MGI Symbol;Acc:MGI:104879]	-	0	0	0	27	3	95	0	0	0	2.32292	0.179386	1.98734
ENSMUSG00000033953	1283.05	519.631	1163.17	378.801	397.239	399.431	988.617	391.824	1.33454	0.00708991	0.139428	Ppp3r1	11	17159263	17200375	+	3228	protein_coding	protein phosphatase 3, regulatory subunit B, alpha isoform (calcineurin B, type I) [Source:MGI Symbol;Acc:MGI:107172]	-	924	574	1083	256	366	1043	44.0401	16.7782	40.0522	13.1684	13.0849	13.0454
ENSMUSG00000032688	1455.23	52.5063	660.527	62.147	34.7313	235.14	722.755	110.673	2.70112	0.00751268	0.142039	Malt1	18	65430962	65478823	+	11735	protein_coding	MALT1 paracaspase [Source:MGI Symbol;Acc:MGI:2445027]	-	1048	58	615	42	32	614	13.74	0.46635	6.25638	0.594284	0.314696	2.11248
ENSMUSG00000020395	0	42.5482	11.8143	145.01	33.646	351.943	18.1208	176.866	-3.27714	0.011065	0.169615	Itk	11	46325150	46389515	-	5354	protein_coding	IL2 inducible T cell kinase [Source:MGI Symbol;Acc:MGI:96621]	-	0	47	11	98	31	919	0	0.828299	0.245271	3.03931	0.668201	6.93017
ENSMUSG00000023274	0	23.5373	1.07403	48.8298	6.51212	351.178	8.20377	135.506	-4.02978	0.0121309	0.178269	Cd4	6	124864692	124888221	-	4032	protein_coding	CD4 antigen [Source:MGI Symbol;Acc:MGI:88335]	-	0	26	1	33	6	917	0	0.608444	0.0296081	1.35901	0.171733	9.18238
ENSMUSG00000024401	594.312	0	422.093	5.91877	13.0242	63.5719	338.802	27.505	3.60886	0.0145492	0.194552	Tnf	17	35199381	35202007	-	1639	protein_coding	tumor necrosis factor [Source:MGI Symbol;Acc:MGI:104798]	-	428	0	393	4	12	166	40.1767	0	28.6249	0.405237	0.84494	4.08918
ENSMUSG00000002033	15.2744	57.938	37.591	133.172	15.1949	525.809	36.9344	224.725	-2.60375	0.0171456	0.211698	Cd3g	9	44969572	44980431	-	3269	protein_coding	CD3 antigen, gamma polypeptide [Source:MGI Symbol;Acc:MGI:88333]	-	11	64	35	90	14	1373	0.517711	1.84728	1.27816	4.57146	0.494239	16.9575
ENSMUSG00000030742	65.2632	61.5591	0	99.1393	30.3899	1014.47	42.2741	381.333	-3.17528	0.0226019	0.238088	Lat	7	126363824	126369570	-	2767	protein_coding	linker for activation of T cells [Source:MGI Symbol;Acc:MGI:1342293]	-	47	68	0	67	28	2649	2.61336	2.31882	0	4.02062	1.16781	38.6527
ENSMUSG00000026395	186.07	152.087	258.841	244.149	160.632	1892.22	198.999	765.668	-1.94556	0.0247814	0.245229	Ptprc	1	138062861	138175708	-	18313	protein_coding	protein tyrosine phosphatase, receptor type, C [Source:MGI Symbol;Acc:MGI:97810]	-	134	168	241	165	148	4941	1.12578	0.8656	1.57104	1.49607	0.932666	10.8934
ENSMUSG00000039936	123.584	129.455	152.512	272.263	144.352	807.67	135.184	408.095	-1.59645	0.0250581	0.246838	Pik3cd	4	149649168	149702571	-	6259	protein_coding	phosphatidylinositol-4,5-bisphosphate 3-kinase catalytic subunit delta [Source:MGI Symbol;Acc:MGI:1098211]	-	89	143	142	184	133	2109	2.18774	2.15575	2.70841	4.88136	2.45228	13.6044
ENSMUSG00000030265	1477.45	1105.35	1496.12	437.989	1013.72	369.177	1359.64	606.962	1.1641	0.0274025	0.257827	Kras	6	145216699	145250239	-	5347	protein_coding	Kirsten rat sarcoma viral oncogene homolog [Source:MGI Symbol;Acc:MGI:96680]	-	1064	1221	1393	296	934	964	30.6155	21.5463	31.1008	9.19198	20.1586	7.27903
ENSMUSG00000007815	2714.67	1896.56	2563.7	1368.71	1543.37	1036.68	2391.65	1316.26	0.861959	0.0294678	0.267563	Rhoa	9	108306129	108337934	+	7494	protein_coding	ras homolog family member A [Source:MGI Symbol;Acc:MGI:1096342]	-	1955	2095	2387	925	1422	2707	40.1368	26.3778	38.025	20.4954	21.8983	14.5842
ENSMUSG00000036526	45.8231	12.6739	0	115.416	36.902	255.82	19.499	136.046	-2.81374	0.0343812	0.289993	Card11	5	140872990	141000582	-	4866	protein_coding	caspase recruitment domain family, member 11 [Source:MGI Symbol;Acc:MGI:1916978]	-	33	14	0	78	34	668	1.0434	0.271471	0	2.66165	0.806363	5.54257
ENSMUSG00000000409	148.578	159.329	46.1832	208.636	70.548	1111.36	118.03	463.515	-1.97555	0.0361295	0.29661	Lck	4	129548344	129573641	-	2929	protein_coding	lymphocyte protein tyrosine kinase [Source:MGI Symbol;Acc:MGI:96756]	-	107	176	43	141	65	2902	5.62049	5.66971	1.75259	7.99332	2.56105	40.0023
ENSMUSG00000028191	1305.26	321.375	867.814	205.677	480.812	315.562	831.484	334.017	1.31464	0.0374863	0.30279	Bcl10	3	145922804	145934356	+	4564	protein_coding	B cell leukemia/lymphoma 10 [Source:MGI Symbol;Acc:MGI:1337994]	-	940	355	808	139	443	824	31.6878	7.33922	21.1347	5.05704	11.2016	7.28934
Myeloid suppressor cells
gene_id	TERC_Sa_1	TERC_Sa_2	TERC_Sa_3	WT_Sa_1	WT_Sa_2	WT_Sa_3	TERC_Sa	WT_Sa	log2FoldChange	pvalue	padj	gene_name	gene_chr	gene_start	gene_end	gene_strand	gene_length	gene_biotype	gene_description	tf_family	TERC_Sa_1_count	TERC_Sa_2_count	TERC_Sa_3_count	WT_Sa_1_count	WT_Sa_2_count	WT_Sa_3_count	TERC_Sa_1_fpkm	TERC_Sa_2_fpkm	TERC_Sa_3_fpkm	WT_Sa_1_fpkm	WT_Sa_2_fpkm	WT_Sa_3_fpkm
ENSMUSG00000022582	22.2173	8.14753	39.739	0	0	0	23.3679	0	7.22219	0.00190173	0.0706773	Ly6g	15	75155240	75159126	+	942	protein_coding	lymphocyte antigen 6 complex, locus G [Source:MGI Symbol;Acc:MGI:109440]	-	16	9	37	0	0	0	2.61324	0.901486	4.68902	0	0	0
ENSMUSG00000030786	145.801	50.6957	327.578	41.4314	48.8409	23.7437	174.692	38.0053	2.20746	0.00952481	0.158006	Itgam	7	128062640	128118491	+	5024	protein_coding	integrin alpha M [Source:MGI Symbol;Acc:MGI:96607]	-	105	56	305	28	45	62	3.21551	1.05173	7.24738	0.925414	1.03368	0.498252
ENSMUSG00000079018	3052.1	1678.39	2299.49	1379.07	1370.8	953.962	2343.33	1234.61	0.924884	0.0307218	0.273743	Ly6c1	15	75044018	75048830	-	1677	protein_coding	lymphocyte antigen 6 complex, locus C1 [Source:MGI Symbol;Acc:MGI:96882]	-	2198	1854	2141	932	1263	2491	201.653	104.314	152.41	92.2806	86.9149	59.9718

## Sheet: Young_WT_Sa vs Young_WT_mock
Supplemental Table 3i. DEG of Young WT S. aureus mice vs. Young WT mock mice. All genes belonging to the respective pathways with a p value <0.05 are listed.
NLRP3 inflammasome signaling
gene_id	WT_Sa_1	WT_Sa_2	WT_Sa_3	WT_mock_1	WT_mock_2	WT_mock_3	WT_Sa	WT_mock	log2FoldChange	pvalue	padj	gene_name	gene_chr	gene_start	gene_end	gene_strand	gene_length	gene_biotype	gene_description	tf_family	WT_Sa_1_count	WT_Sa_2_count	WT_Sa_3_count	WT_mock_1_count	WT_mock_2_count	WT_mock_3_count	WT_Sa_1_fpkm	WT_Sa_2_fpkm	WT_Sa_3_fpkm	WT_mock_1_fpkm	WT_mock_2_fpkm	WT_mock_3_fpkm
ENSMUSG00000037860	39.471	17.6742	208.91	17.2435	19.4654	9.28176	88.6852	15.3302	2.5456	0.0128012	0.980721	Aim2	1	173350879	173466040	+	3501	protein_coding	absent in melanoma 2 [Source:MGI Symbol;Acc:MGI:2686159]	-	25	15	510	12	21	11	1.1857	0.494451	5.88145	0.474772	0.529664	0.272794
ENSMUSG00000006519	459.443	399.436	853.665	198.3	289.2	332.456	570.848	273.319	1.06322	0.025861	0.980721	Cyba	8	122424776	122432930	-	1039	protein_coding	cytochrome b-245, alpha polypeptide [Source:MGI Symbol;Acc:MGI:1316658]	-	291	339	2084	138	312	394	46.5056	37.6537	80.982	18.3975	26.5163	32.9242
ENSMUSG00000046709	85.2574	5.89139	15.5659	8.62175	1.85385	5.90657	35.5715	5.46072	2.71088	0.0365271	0.980721	Mapk10	5	102907948	103211334	-	11130	protein_coding	mitogen-activated protein kinase 10 [Source:MGI Symbol;Acc:MGI:1346863]	-	54	5	38	6	2	7	0.805613	0.051844	0.137846	0.074671	0.0158675	0.0546057
ENSMUSG00000038393	1733.57	2502.66	2257.87	3738.96	3339.7	3098.42	2164.7	3392.36	-0.647664	0.0414151	0.980721	Txnip	3	96557957	96561883	+	3123	protein_coding	thioredoxin interacting protein [Source:MGI Symbol;Acc:MGI:1889549]	-	1098	2124	5512	2602	3603	3672	58.3792	78.4886	71.2597	115.407	101.875	102.086
ENSMUSG00000034786	255.772	95.4405	156.888	90.5283	82.4962	45.565	169.367	72.8632	1.21787	0.0424137	0.980721	Gpsm3	17	34589806	34591754	+	1343	protein_coding	G-protein signalling modulator 3 (AGS3-like, C. elegans) [Source:MGI Symbol;Acc:MGI:2146785]	-	162	81	383	63	89	54	20.0293	6.96038	11.5141	6.49771	5.85177	3.49102
ENSMUSG00000042349	126.307	43.5963	615.671	31.6131	45.4192	131.632	261.858	69.5548	1.91241	0.047803	0.980721	Ikbke	1	131254343	131279606	-	9018	protein_coding	inhibitor of kappaB kinase epsilon [Source:MGI Symbol;Acc:MGI:1929612]	-	80	37	1503	22	49	156	1.47302	0.473495	6.72907	0.337915	0.479799	1.50193
Macrophage marker
gene_id	WT_Sa_1	WT_Sa_2	WT_Sa_3	WT_mock_1	WT_mock_2	WT_mock_3	WT_Sa	WT_mock	log2FoldChange	pvalue	padj	gene_name	gene_chr	gene_start	gene_end	gene_strand	gene_length	gene_biotype	gene_description	tf_family	WT_Sa_1_count	WT_Sa_2_count	WT_Sa_3_count	WT_mock_1_count	WT_mock_2_count	WT_mock_3_count	WT_Sa_1_fpkm	WT_Sa_2_fpkm	WT_Sa_3_fpkm	WT_mock_1_fpkm	WT_mock_2_fpkm	WT_mock_3_fpkm
ENSMUSG00000026395	260.509	174.385	2023.97	100.587	158.504	183.948	819.622	147.679	2.47292	0.00421211	0.980721	Ptprc	1	138062861	138175708	-	18313	protein_coding	protein tyrosine phosphatase, receptor type, C [Source:MGI Symbol;Acc:MGI:97810]	-	165	148	4941	70	171	218	1.49607	0.932666	10.8934	0.529461	0.824537	1.03355
ENSMUSG00000000290	156.305	114.293	638.611	117.831	66.7385	68.3475	303.07	84.3055	1.8532	0.0128971	0.980721	Itgb2	10	77530252	77565708	+	3052	protein_coding	integrin beta 2 [Source:MGI Symbol;Acc:MGI:96611]	-	99	97	1559	82	72	81	5.38615	3.66785	20.6238	3.72156	2.08315	2.30428
ENSMUSG00000018774	151.569	21.209	101.588	25.8652	9.26923	27.0015	91.4552	20.712	2.14477	0.0173116	0.980721	Cd68	11	69664213	69666153	-	1257	protein_coding	CD68 antigen [Source:MGI Symbol;Acc:MGI:88342]	-	96	18	248	18	10	32	12.6813	1.65257	7.96568	1.9835	0.702487	2.21029
ENSMUSG00000021356	55.2594	80.1229	111.829	34.487	32.4423	11.8131	82.4036	26.2475	1.66684	0.0205965	0.980721	Irf4	13	30749226	30766976	+	4903	protein_coding	interferon regulatory factor 4 [Source:MGI Symbol;Acc:MGI:1096873]	IRF	35	68	273	24	35	14	1.18532	1.60056	2.24806	0.678024	0.630347	0.247914
ENSMUSG00000026390	64.7325	71.8749	135.997	0	18.5385	27.8453	90.868	15.4612	2.53888	0.0208245	0.980721	Marco	1	120474538	120505024	-	1925	protein_coding	macrophage receptor with collagenous structure [Source:MGI Symbol;Acc:MGI:1309998]	-	41	61	332	0	20	33	3.53656	3.65698	6.96328	0	0.917429	1.48839
Chemokine signaling
gene_id	WT_Sa_1	WT_Sa_2	WT_Sa_3	WT_mock_1	WT_mock_2	WT_mock_3	WT_Sa	WT_mock	log2FoldChange	pvalue	padj	gene_name	gene_chr	gene_start	gene_end	gene_strand	gene_length	gene_biotype	gene_description	tf_family	WT_Sa_1_count	WT_Sa_2_count	WT_Sa_3_count	WT_mock_1_count	WT_mock_2_count	WT_mock_3_count	WT_Sa_1_fpkm	WT_Sa_2_fpkm	WT_Sa_3_fpkm	WT_mock_1_fpkm	WT_mock_2_fpkm	WT_mock_3_fpkm
ENSMUSG00000039936	290.507	156.711	863.906	54.6044	76.9346	127.413	437.041	86.3174	2.33936	0.00107026	0.980721	Pik3cd	4	149649168	149702571	-	6259	protein_coding	phosphatidylinositol-4,5-bisphosphate 3-kinase catalytic subunit delta [Source:MGI Symbol;Acc:MGI:1098211]	-	184	133	2109	38	83	151	4.88136	2.45228	13.6044	0.840958	1.17097	2.09463
ENSMUSG00000020395	154.726	36.5266	376.448	28.7392	25.9538	33.7518	189.234	29.4816	2.68584	0.00128722	0.980721	Itk	11	46325150	46389515	-	5354	protein_coding	IL2 inducible T cell kinase [Source:MGI Symbol;Acc:MGI:96621]	-	98	31	919	20	28	40	3.03931	0.668201	6.93017	0.517425	0.461799	0.648659
ENSMUSG00000015950	533.648	305.174	454.687	219.855	203.923	213.48	431.17	212.419	1.02117	0.00997294	0.980721	Ncf1	5	134220053	134229625	-	3663	protein_coding	neutrophil cytosolic factor 1 [Source:MGI Symbol;Acc:MGI:97283]	-	338	259	1110	153	220	253	15.3217	8.15993	12.2347	5.78562	5.30346	5.99679
ENSMUSG00000034116	266.824	87.1925	471.892	76.1587	91.7654	86.0672	275.303	84.6638	1.70341	0.0103337	0.980721	Vav1	17	57279100	57328031	+	3688	protein_coding	vav 1 oncogene [Source:MGI Symbol;Acc:MGI:98923]	-	169	74	1152	53	99	102	7.60893	2.31561	12.6115	1.99058	2.37038	2.40129
ENSMUSG00000031659	246.299	212.09	733.644	107.772	100.108	205.886	397.344	137.922	1.52806	0.0174983	0.980721	Adcy7	8	88272403	88329962	+	6733	protein_coding	adenylate cyclase 7 [Source:MGI Symbol;Acc:MGI:102891]	-	156	180	1791	75	108	244	3.84719	3.08523	10.7397	1.54294	1.41641	3.14642
ENSMUSG00000034855	15.7884	10.6045	7.37331	1.43696	0	0	11.2554	0.478986	4.90857	0.0175265	0.980721	Cxcl10	5	92346638	92348889	-	2252	protein_coding	chemokine (C-X-C motif) ligand 10 [Source:MGI Symbol;Acc:MGI:1352450]	-	10	9	18	1	0	0	0.737326	0.461209	0.322709	0.0615074	0	0
ENSMUSG00000074886	254.193	184.99	726.681	136.511	125.135	167.072	388.621	142.906	1.44653	0.0189494	0.980721	Grk6	13	55445072	55460927	+	4202	protein_coding	G protein-coupled receptor kinase 6 [Source:MGI Symbol;Acc:MGI:1347078]	-	161	157	1774	95	135	198	6.36206	4.31189	17.0453	3.13158	2.83695	4.09114
ENSMUSG00000020901	44.2075	104.867	231.85	0	19.4654	43.0336	126.975	20.833	2.5979	0.0283843	0.980721	Pik3r5	11	68432121	68497849	+	5550	protein_coding	phosphoinositide-3-kinase regulatory subunit 5 [Source:MGI Symbol;Acc:MGI:2443588]	-	28	89	566	0	21	51	0.837708	1.85064	4.11747	0	0.334118	0.797833
ENSMUSG00000020143	209.986	73.0532	620.177	89.0914	135.331	69.1913	301.072	97.8711	1.62437	0.0367946	0.980721	Dock2	11	34226815	34783892	-	11425	protein_coding	dedicator of cyto-kinesis 2 [Source:MGI Symbol;Acc:MGI:2149010]	-	133	62	1514	62	146	82	1.93296	0.626267	5.35028	0.751677	1.12842	0.62315
ENSMUSG00000029530	105.782	21.209	48.3361	20.1174	1.85385	16.8759	58.4425	12.9491	2.1804	0.0415097	0.980721	Ccr9	9	123678439	123784330	+	10260	protein_coding	chemokine (C-C motif) receptor 9 [Source:MGI Symbol;Acc:MGI:1341902]	-	67	18	118	14	2	20	1.08431	0.202465	0.464345	0.189006	0.017213	0.169246
ENSMUSG00000045382	238.405	131.967	315.414	132.2	94.5462	107.162	228.595	111.303	1.04365	0.0415495	0.980721	Cxcr4	1	128588199	128592293	-	1808	protein_coding	chemokine (C-X-C motif) receptor 4 [Source:MGI Symbol;Acc:MGI:109563]	-	151	112	770	92	102	127	13.8678	7.14897	17.1949	7.04831	4.98167	6.09874
T helper marker
gene_id	WT_Sa_1	WT_Sa_2	WT_Sa_3	WT_mock_1	WT_mock_2	WT_mock_3	WT_Sa	WT_mock	log2FoldChange	pvalue	padj	gene_name	gene_chr	gene_start	gene_end	gene_strand	gene_length	gene_biotype	gene_description	tf_family	WT_Sa_1_count	WT_Sa_2_count	WT_Sa_3_count	WT_mock_1_count	WT_mock_2_count	WT_mock_3_count	WT_Sa_1_fpkm	WT_Sa_2_fpkm	WT_Sa_3_fpkm	WT_mock_1_fpkm	WT_mock_2_fpkm	WT_mock_3_fpkm
ENSMUSG00000000409	222.616	76.588	1188.74	67.537	63.0308	50.6278	495.982	60.3985	3.04102	0.000539277	0.884623	Lck	4	129548344	129573641	-	2929	protein_coding	lymphocyte protein tyrosine kinase [Source:MGI Symbol;Acc:MGI:96756]	-	141	65	2902	47	68	60	7.99332	2.56105	40.0023	2.22267	2.05004	1.77855
ENSMUSG00000024669	127.886	0	170.405	0	0	3.37518	99.4305	1.12506	6.38178	0.000801004	0.980721	Cd5	19	10718143	10738974	-	2069	protein_coding	CD5 antigen [Source:MGI Symbol;Acc:MGI:88340]	-	81	0	416	0	0	4	6.50058	0	8.11782	0	0	0.167855
ENSMUSG00000005763	48.944	30.6352	222.428	15.8065	21.3192	19.4073	100.669	18.8444	2.42353	0.00719686	0.980721	Cd247	1	165788681	165877277	+	5329	protein_coding	CD247 antigen [Source:MGI Symbol;Acc:MGI:88334]	-	31	26	543	11	23	23	0.965925	0.563056	4.11397	0.285919	0.381114	0.374729
ENSMUSG00000019256	211.565	294.569	170.815	714.168	730.415	273.39	225.65	572.658	-1.34462	0.0106527	0.980721	Ahr	12	35497974	35535038	-	6163	protein_coding	aryl-hydrocarbon receptor [Source:MGI Symbol;Acc:MGI:105043]	bHLH	134	250	417	497	788	324	3.61027	4.68136	2.73181	11.1702	11.2903	4.56444
ENSMUSG00000030745	42.6287	10.6045	418.64	0	29.6615	7.59417	157.291	12.4186	3.65435	0.010925	0.980721	Il21r	7	125603429	125633570	+	3324	protein_coding	interleukin 21 receptor [Source:MGI Symbol;Acc:MGI:1890475]	-	27	9	1022	0	32	9	1.34875	0.312468	12.4136	0	0.850085	0.23508
ENSMUSG00000052013	82.0997	16.4959	498.927	22.9913	45.4192	35.4394	199.174	34.6167	2.52585	0.0153258	0.980721	Btla	16	45224315	45257670	+	3396	protein_coding	B and T lymphocyte associated [Source:MGI Symbol;Acc:MGI:2658978]	-	52	14	1218	16	49	42	2.54251	0.475756	14.4806	0.652601	1.27409	1.07378
ENSMUSG00000021356	55.2594	80.1229	111.829	34.487	32.4423	11.8131	82.4036	26.2475	1.66684	0.0205965	0.980721	Irf4	13	30749226	30766976	+	4903	protein_coding	interferon regulatory factor 4 [Source:MGI Symbol;Acc:MGI:1096873]	IRF	35	68	273	24	35	14	1.18532	1.60056	2.24806	0.678024	0.630347	0.247914
ENSMUSG00000023274	52.1017	7.06966	375.629	12.9326	37.0769	21.0949	144.934	23.7015	2.61297	0.0253034	0.980721	Cd4	6	124864692	124888221	-	4032	protein_coding	CD4 antigen [Source:MGI Symbol;Acc:MGI:88335]	-	33	6	917	9	40	25	1.35901	0.171733	9.18238	0.309184	0.876018	0.538337
ENSMUSG00000030336	112.098	40.0614	253.15	10.0587	50.9808	43.0336	135.103	34.691	1.95718	0.0273318	0.980721	Cd27	6	125232622	125237010	-	2328	protein_coding	CD27 antigen [Source:MGI Symbol;Acc:MGI:88326]	-	71	34	618	7	55	51	5.06411	1.68546	10.718	0.416496	2.08619	1.90205
TCR signaling
gene_id	WT_Sa_1	WT_Sa_2	WT_Sa_3	WT_mock_1	WT_mock_2	WT_mock_3	WT_Sa	WT_mock	log2FoldChange	pvalue	padj	gene_name	gene_chr	gene_start	gene_end	gene_strand	gene_length	gene_biotype	gene_description	tf_family	WT_Sa_1_count	WT_Sa_2_count	WT_Sa_3_count	WT_mock_1_count	WT_mock_2_count	WT_mock_3_count	WT_Sa_1_fpkm	WT_Sa_2_fpkm	WT_Sa_3_fpkm	WT_mock_1_fpkm	WT_mock_2_fpkm	WT_mock_3_fpkm
ENSMUSG00000021250	94.7304	220.338	208.91	581.968	595.085	615.971	174.66	597.675	-1.76888	0.000100426	0.771913	Fos	12	85473890	85477273	+	2352	protein_coding	FBJ osteosarcoma oncogene [Source:MGI Symbol;Acc:MGI:95574]	TF_bZIP	60	187	510	405	642	730	4.23586	9.17546	8.75466	23.8514	24.103	26.9476
ENSMUSG00000000409	222.616	76.588	1188.74	67.537	63.0308	50.6278	495.982	60.3985	3.04102	0.000539277	0.884623	Lck	4	129548344	129573641	-	2929	protein_coding	lymphocyte protein tyrosine kinase [Source:MGI Symbol;Acc:MGI:96756]	-	141	65	2902	47	68	60	7.99332	2.56105	40.0023	2.22267	2.05004	1.77855
ENSMUSG00000039936	290.507	156.711	863.906	54.6044	76.9346	127.413	437.041	86.3174	2.33936	0.00107026	0.980721	Pik3cd	4	149649168	149702571	-	6259	protein_coding	phosphatidylinositol-4,5-bisphosphate 3-kinase catalytic subunit delta [Source:MGI Symbol;Acc:MGI:1098211]	-	184	133	2109	38	83	151	4.88136	2.45228	13.6044	0.840958	1.17097	2.09463
ENSMUSG00000020395	154.726	36.5266	376.448	28.7392	25.9538	33.7518	189.234	29.4816	2.68584	0.00128722	0.980721	Itk	11	46325150	46389515	-	5354	protein_coding	IL2 inducible T cell kinase [Source:MGI Symbol;Acc:MGI:96621]	-	98	31	919	20	28	40	3.03931	0.668201	6.93017	0.517425	0.461799	0.648659
ENSMUSG00000004266	569.961	177.92	1479.58	153.754	117.719	190.698	742.486	154.057	2.27022	0.00162015	0.980721	Ptpn6	6	124720707	124738714	-	2802	protein_coding	protein tyrosine phosphatase, non-receptor type 6 [Source:MGI Symbol;Acc:MGI:96055]	-	361	151	3612	107	127	226	21.3928	6.21917	52.0459	5.28946	4.00229	7.00286
ENSMUSG00000032094	80.5209	50.6659	558.323	40.2348	29.6615	28.6891	229.837	32.8618	2.81391	0.00205603	0.980721	Cd3d	9	44981786	44987339	+	1815	protein_coding	CD3 antigen, delta polypeptide [Source:MGI Symbol;Acc:MGI:88331]	-	51	43	1363	28	32	34	4.66575	2.73411	30.3198	2.13686	1.55685	1.62644
ENSMUSG00000026395	260.509	174.385	2023.97	100.587	158.504	183.948	819.622	147.679	2.47292	0.00421211	0.980721	Ptprc	1	138062861	138175708	-	18313	protein_coding	protein tyrosine phosphatase, receptor type, C [Source:MGI Symbol;Acc:MGI:97810]	-	165	148	4941	70	171	218	1.49607	0.932666	10.8934	0.529461	0.824537	1.03355
ENSMUSG00000036526	123.15	40.0614	273.632	37.3609	38.0038	19.4073	145.614	31.5907	2.21389	0.00600973	0.980721	Card11	5	140872990	141000582	-	4866	protein_coding	caspase recruitment domain family, member 11 [Source:MGI Symbol;Acc:MGI:1916978]	-	78	34	668	26	41	23	2.66165	0.806363	5.54257	0.740111	0.744021	0.410384
ENSMUSG00000005763	48.944	30.6352	222.428	15.8065	21.3192	19.4073	100.669	18.8444	2.42353	0.00719686	0.980721	Cd247	1	165788681	165877277	+	5329	protein_coding	CD247 antigen [Source:MGI Symbol;Acc:MGI:88334]	-	31	26	543	11	23	23	0.965925	0.563056	4.11397	0.285919	0.381114	0.374729
ENSMUSG00000033016	371.027	193.237	347.774	71.8479	172.408	85.2234	304.013	109.826	1.46604	0.00798996	0.980721	Nfatc1	18	80606205	80713071	-	7433	protein_coding	nuclear factor of activated T cells, cytoplasmic, calcineurin dependent 1 [Source:MGI Symbol;Acc:MGI:102469]	RHD	235	164	849	50	186	101	5.24966	2.54626	4.61158	0.931754	2.20964	1.17976
ENSMUSG00000030742	105.782	32.9918	1085.11	30.1761	38.9308	108.006	407.96	59.0376	2.7879	0.0101788	0.980721	Lat	7	126363824	126369570	-	2767	protein_coding	linker for activation of T cells [Source:MGI Symbol;Acc:MGI:1342293]	-	67	28	2649	21	42	128	4.02062	1.16781	38.6527	1.05125	1.34034	4.01639
ENSMUSG00000034116	266.824	87.1925	471.892	76.1587	91.7654	86.0672	275.303	84.6638	1.70341	0.0103337	0.980721	Vav1	17	57279100	57328031	+	3688	protein_coding	vav 1 oncogene [Source:MGI Symbol;Acc:MGI:98923]	-	169	74	1152	53	99	102	7.60893	2.31561	12.6115	1.99058	2.37038	2.40129
ENSMUSG00000053044	50.5229	17.6742	483.361	57.4783	13.9038	1.68759	183.853	24.3566	2.93188	0.0242639	0.980721	Cd8b1	6	71322788	71337494	+	1483	protein_coding	CD8 antigen, beta chain 1 [Source:MGI Symbol;Acc:MGI:88347]	-	32	15	1180	40	15	2	3.58291	1.16728	32.1253	3.73607	0.893148	0.117091
ENSMUSG00000023274	52.1017	7.06966	375.629	12.9326	37.0769	21.0949	144.934	23.7015	2.61297	0.0253034	0.980721	Cd4	6	124864692	124888221	-	4032	protein_coding	CD4 antigen [Source:MGI Symbol;Acc:MGI:88335]	-	33	6	917	9	40	25	1.35901	0.171733	9.18238	0.309184	0.876018	0.538337
ENSMUSG00000027347	116.834	12.9611	219.151	33.05	28.7346	19.4073	116.315	27.064	2.1116	0.0265838	0.980721	Rasgrp1	2	117279993	117343001	-	5600	protein_coding	RAS guanyl releasing protein 1 [Source:MGI Symbol;Acc:MGI:1314635]	-	74	11	535	23	31	23	2.19418	0.226688	3.8572	0.568899	0.488818	0.356595
ENSMUSG00000032475	216.301	274.539	262.162	484.255	546.885	332.456	251.001	454.532	-0.854624	0.0290069	0.980721	Nck1	9	100492293	100546134	-	4792	protein_coding	non-catalytic region of tyrosine kinase adaptor protein 1 [Source:MGI Symbol;Acc:MGI:109601]	-	137	233	640	337	590	394	4.74713	5.61129	5.39225	9.74112	10.872	7.13862
ENSMUSG00000046709	85.2574	5.89139	15.5659	8.62175	1.85385	5.90657	35.5715	5.46072	2.71088	0.0365271	0.980721	Mapk10	5	102907948	103211334	-	11130	protein_coding	mitogen-activated protein kinase 10 [Source:MGI Symbol;Acc:MGI:1346863]	-	54	5	38	6	2	7	0.805613	0.051844	0.137846	0.074671	0.0158675	0.0546057
