# Supplementary figures and images for: Telomerase RNA component knockout exacerbates Staphylococcus aureus pneumonia by extensive inflammation and dysfunction of T cells
Source: eLife journal article supplement (doi:10.7554/elife.100433), 2024-08-22

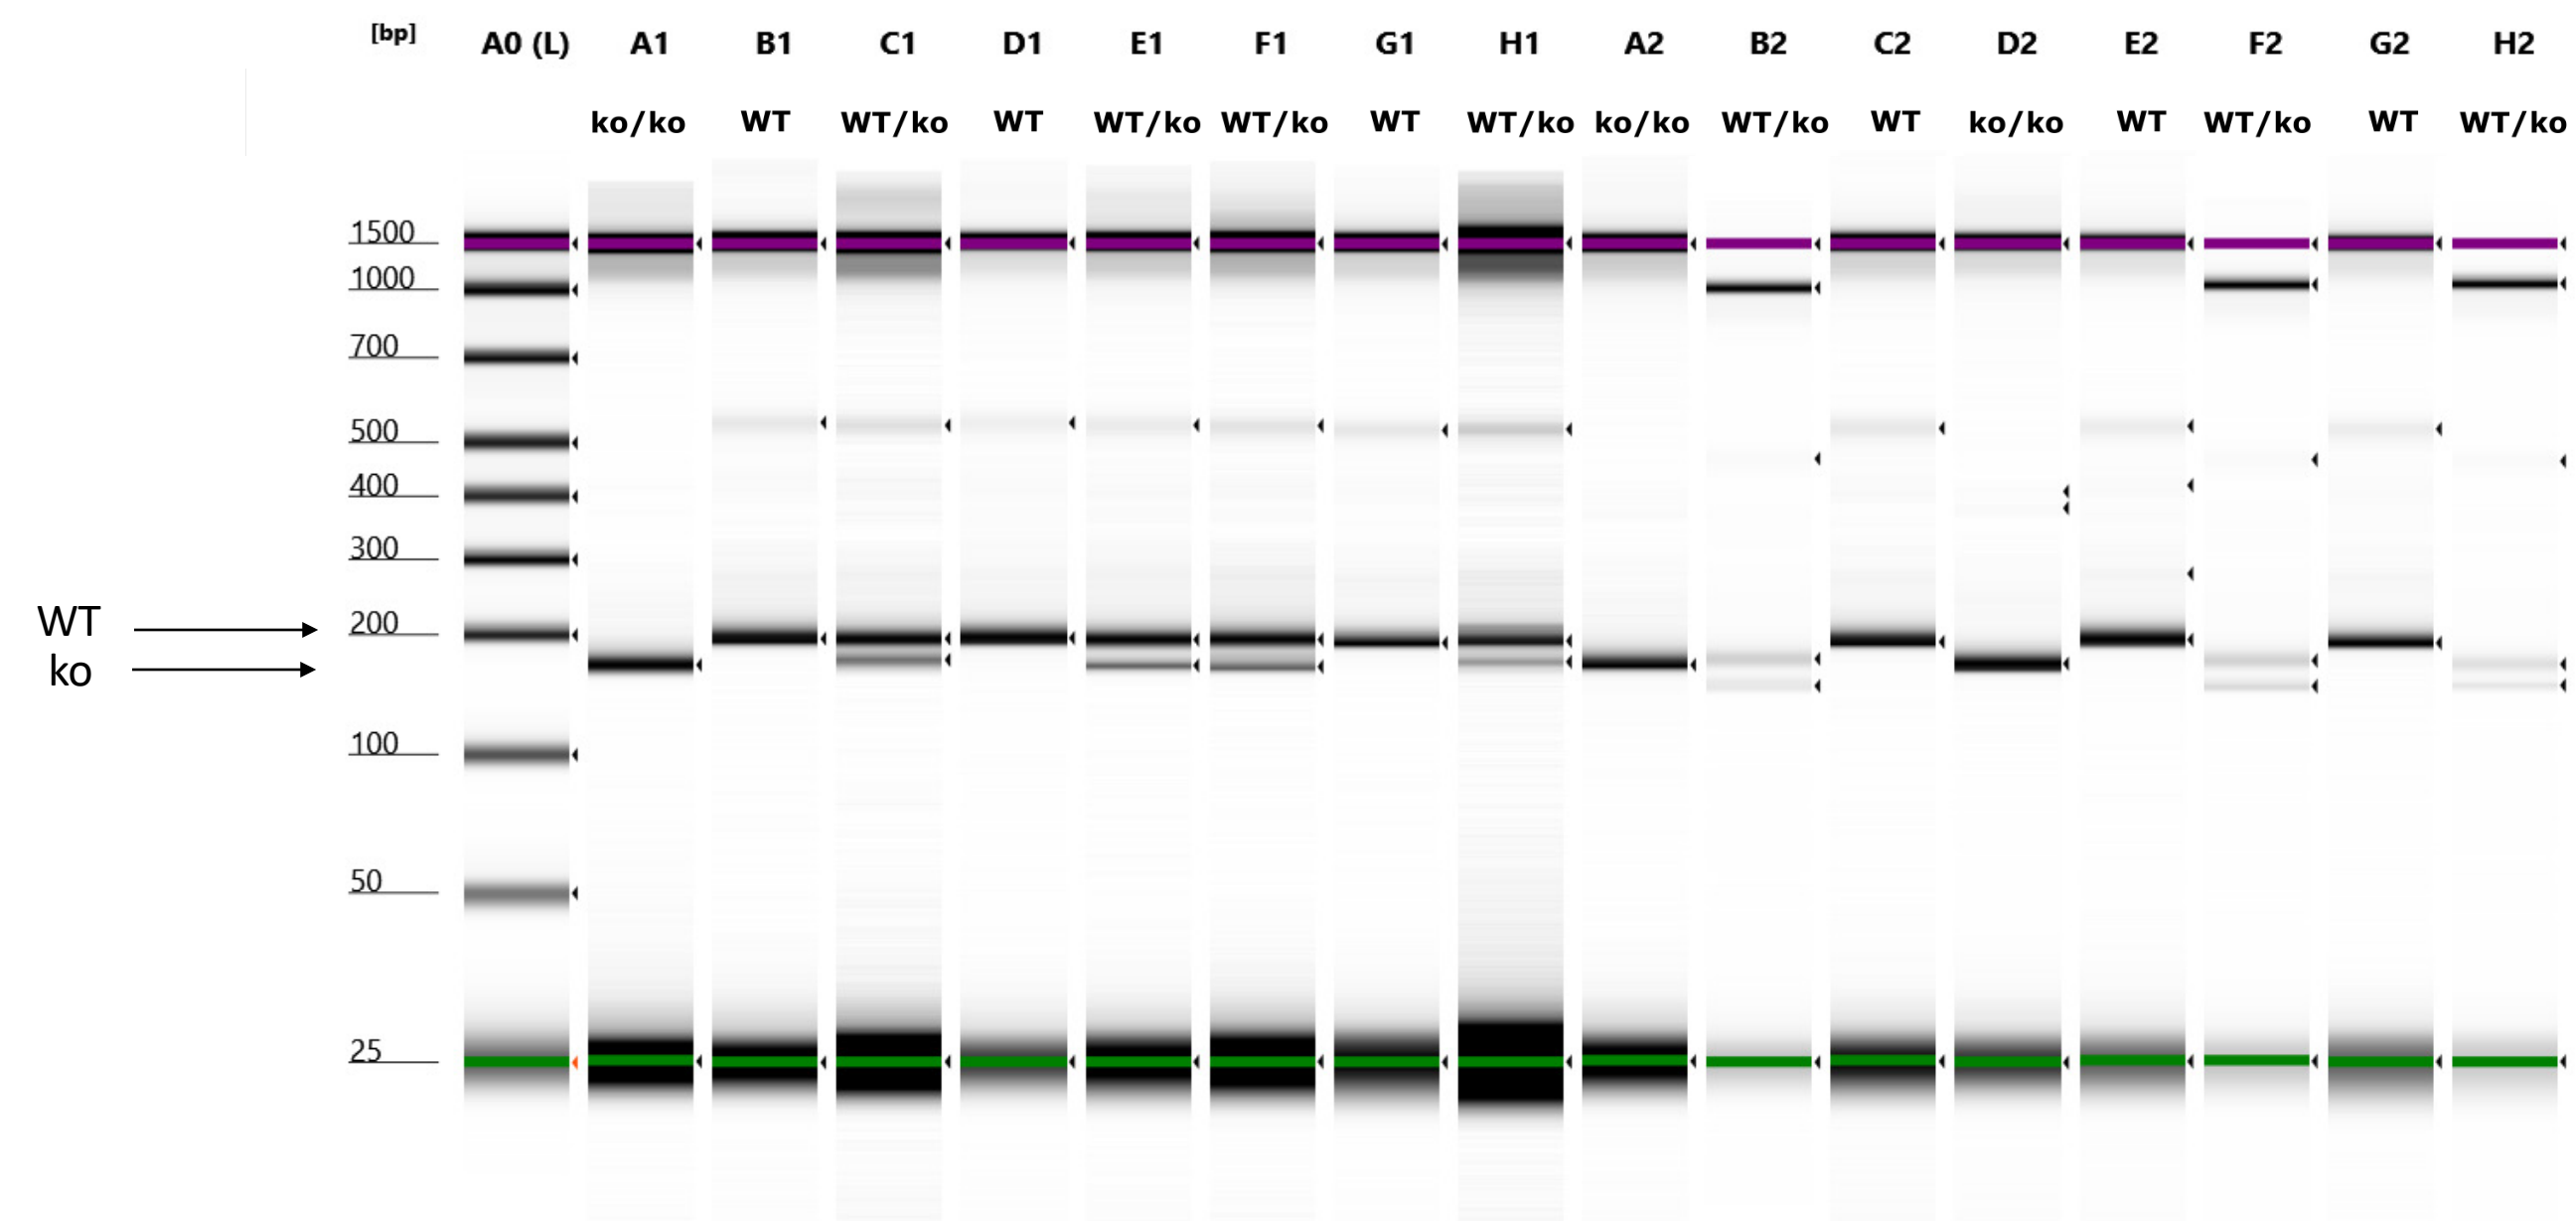

Supplement: data2 [file elife-100433-data2-v1.zip]
